# Supplementary material for: Corrigendum to “Identification of Differentially Expressed Genes in Pituitary Adenomas by Integrating Analysis of Microarray Data”
Source: Int J Endocrinol. 2018 Sep 6;2018:6069189. doi: 10.1155/2018/6069189 (PMC6146651; doi:10.1155/2018/6069189)
Supplement: Supplementary 1 — The raw data of the included datasets downloaded from GEO database. [file 6069189.f1.zip]

Archive with 5 entries (5 files):
- row data_GSE22812_series_matrix.txt
- row data_GSE36314_series_matrix.txt
- row data_GSE4237_series_matrix.txt
- row data_GSE46311_series_matrix.txt
- row data_GSE51618_series_matrix.txt
