# Supplementary material for: Corrigendum to “Identification of Differentially Expressed Genes in Pituitary Adenomas by Integrating Analysis of Microarray Data”
Source: Int J Endocrinol. 2018 Sep 6;2018:6069189. doi: 10.1155/2018/6069189 (PMC6146651; doi:10.1155/2018/6069189)
Supplement: Supplementary 1 — The raw data of the included datasets downloaded from GEO database. [file 6069189.f1.zip › row data_GSE4237_series_matrix.txt]

!Series_title	"Hussaini-2R01NS035122-06A1"
!Series_geo_accession	"GSE4237"
!Series_status	"Public on Feb 14 2006"
!Series_submission_date	"Feb 14 2006"
!Series_last_update_date	"Sep 15 2017"
!Series_summary	"Pituitary adenomas are common benign neoplasms giving rise to disorders of growth, reproductive function and cortisol production. Although recently determined to be monoclonal, very little is known about the mechanisms regulating the development of pituitary hyperplasia and neoplasia in humans. Surgical resection is the treatment of choice for most symptomatic pituitary adenomas. The goal of surgery is the complete removal of the tumor and the success of surgery is strongly affected by the presence of local invasion. However, complete tumor removal is unlikely when there is extensive local invasion. Identifying genes that control the invasiveness and recurrence of this class of tumors will provide therapeutic targets for this class of tumors."
!Series_summary	"We will determine the expression pattern of genes in recurrent and invasive and  pituitary adenomas and compare those to non-invasive and non-recurrent  tumors."
!Series_summary	"We hypothesize that the differential expression and activation of a number of genes affect pituitary adenoma recurrence  and invasiveness."
!Series_summary	"Rationale:  Preliminary result showed a differential expression of novel PKC isozymes in non-invasive and invasive pituitary adenomas. PMA, an activator of both novel and classical PKC isozymes increased the expression of gelatinase A (MMP-2) mRNA in human pituitary adenoma cell line. This result raises a fundamental question as to the functional role of novel PKC isozymes and proteases in the invasive phenotype of pituitary adenomas. The primary component of this Specific Aim is to determine whether specific genes are differentially expressed in recurrent or invasive adenomas when compared with control non-invasive tumors.  Tissue specimens from non-invasive and invasive (dural invasion based microscopic examination) and recurrent vs non-recurrent tumors will be used for microarray analysis.  Frozen pituitaryspecimens will be collected and total RNA extracted with TriZol reagent. We will  provide  total RNA (10 ug) from non-invasive, invasive, reoccurred and non-occurrent pituitary adenomas."
!Series_summary	"Keywords: other"
!Series_type	"Expression profiling by array"
!Series_contributor	"Isa,M,Hussaini"
!Series_sample_id	"GSM96620 GSM96621 GSM96622 GSM96623 GSM96624 GSM96625 GSM96626 GSM96627 GSM96628 GSM96629 "
!Series_contact_name	"Winnie,,Liang"
!Series_contact_institute	"Translational Genomics"
!Series_contact_address	"445 N. Fifth Street"
!Series_contact_city	"Phoenix"
!Series_contact_state	"AZ"
!Series_contact_zip/postal_code	"85012"
!Series_contact_country	"USA"
!Series_supplementary_file	"ftp://ftp.ncbi.nlm.nih.gov/geo/series/GSE4nnn/GSE4237/suppl/GSE4237_RAW.tar"
!Series_platform_id	"GPL570"
!Series_platform_taxid	"9606"
!Series_sample_taxid	"9606"
!Series_relation	"BioProject: https://www.ncbi.nlm.nih.gov/bioproject/PRJNA94895"

!Sample_title	"brain, pituitary: Recurrent Pituitary Adenoma_e1_le1"	"brain, pituitary: Non-recurrent pituitary adenoma_e1_le1"	"brain, pituitary: Invasive pituitary adenoma_e1_le1"	"brain, pituitary: Non-invasive pituitary adenoma_e1_le1"	"brain, pituitary: Sample5_e1_le1"	"brain, pituitary: Sample6_e1_le1"	"brain, pituitary: Sample7_e1_le1"	"brain, pituitary: Sample8_e1_le1"	"brain, pituitary: Sample9_e1_le1"	"brain, pituitary: Sample10_e1_le1"
!Sample_geo_accession	"GSM96620"	"GSM96621"	"GSM96622"	"GSM96623"	"GSM96624"	"GSM96625"	"GSM96626"	"GSM96627"	"GSM96628"	"GSM96629"
!Sample_status	"Public on Feb 14 2006"	"Public on Feb 14 2006"	"Public on Feb 14 2006"	"Public on Feb 14 2006"	"Public on Feb 14 2006"	"Public on Feb 14 2006"	"Public on Feb 14 2006"	"Public on Feb 14 2006"	"Public on Feb 14 2006"	"Public on Feb 14 2006"
!Sample_submission_date	"Feb 14 2006"	"Feb 14 2006"	"Feb 14 2006"	"Feb 14 2006"	"Feb 14 2006"	"Feb 14 2006"	"Feb 14 2006"	"Feb 14 2006"	"Feb 14 2006"	"Feb 14 2006"
!Sample_last_update_date	"May 22 2013"	"May 22 2013"	"May 22 2013"	"May 22 2013"	"May 22 2013"	"May 22 2013"	"May 22 2013"	"May 22 2013"	"May 22 2013"	"May 22 2013"
!Sample_type	"RNA"	"RNA"	"RNA"	"RNA"	"RNA"	"RNA"	"RNA"	"RNA"	"RNA"	"RNA"
!Sample_channel_count	"1"	"1"	"1"	"1"	"1"	"1"	"1"	"1"	"1"	"1"
!Sample_source_name_ch1	"brain, pituitary"	"brain, pituitary"	"brain, pituitary"	"brain, pituitary"	"brain, pituitary"	"brain, pituitary"	"brain, pituitary"	"brain, pituitary"	"brain, pituitary"	"brain, pituitary"
!Sample_organism_ch1	"Homo sapiens"	"Homo sapiens"	"Homo sapiens"	"Homo sapiens"	"Homo sapiens"	"Homo sapiens"	"Homo sapiens"	"Homo sapiens"	"Homo sapiens"	"Homo sapiens"
!Sample_molecule_ch1	"total RNA"	"total RNA"	"total RNA"	"total RNA"	"total RNA"	"total RNA"	"total RNA"	"total RNA"	"total RNA"	"total RNA"
!Sample_taxid_ch1	"9606"	"9606"	"9606"	"9606"	"9606"	"9606"	"9606"	"9606"	"9606"	"9606"
!Sample_description	"RESECTED HUMAN PITUITARY TUMOR "	"RESECTED HUMAN PITUITARY TUMOR "	"RESECTED HUMAN PITUITARY TUMOR "	"RESECTED HUMAN PITUITARY TUMOR "	"RESECTED HUMAN PITUITARY TUMOR "	"RESECTED HUMAN PITUITARY TUMOR "	"RESECTED HUMAN PITUITARY TUMOR "	"HP75- Tumor Cell Line"	"HP75- Tumor Cell Line"	"RESECTED HUMAN PITUITARY TUMOR "
!Sample_platform_id	"GPL570"	"GPL570"	"GPL570"	"GPL570"	"GPL570"	"GPL570"	"GPL570"	"GPL570"	"GPL570"	"GPL570"
!Sample_contact_name	"Winnie,,Liang"	"Winnie,,Liang"	"Winnie,,Liang"	"Winnie,,Liang"	"Winnie,,Liang"	"Winnie,,Liang"	"Winnie,,Liang"	"Winnie,,Liang"	"Winnie,,Liang"	"Winnie,,Liang"
!Sample_contact_institute	"Translational Genomics"	"Translational Genomics"	"Translational Genomics"	"Translational Genomics"	"Translational Genomics"	"Translational Genomics"	"Translational Genomics"	"Translational Genomics"	"Translational Genomics"	"Translational Genomics"
!Sample_contact_address	"445 N. Fifth Street"	"445 N. Fifth Street"	"445 N. Fifth Street"	"445 N. Fifth Street"	"445 N. Fifth Street"	"445 N. Fifth Street"	"445 N. Fifth Street"	"445 N. Fifth Street"	"445 N. Fifth Street"	"445 N. Fifth Street"
!Sample_contact_city	"Phoenix"	"Phoenix"	"Phoenix"	"Phoenix"	"Phoenix"	"Phoenix"	"Phoenix"	"Phoenix"	"Phoenix"	"Phoenix"
!Sample_contact_state	"AZ"	"AZ"	"AZ"	"AZ"	"AZ"	"AZ"	"AZ"	"AZ"	"AZ"	"AZ"
!Sample_contact_zip/postal_code	"85012"	"85012"	"85012"	"85012"	"85012"	"85012"	"85012"	"85012"	"85012"	"85012"
!Sample_contact_country	"USA"	"USA"	"USA"	"USA"	"USA"	"USA"	"USA"	"USA"	"USA"	"USA"
!Sample_supplementary_file	"ftp://ftp.ncbi.nlm.nih.gov/geo/samples/GSM96nnn/GSM96620/suppl/GSM96620.cel.gz"	"ftp://ftp.ncbi.nlm.nih.gov/geo/samples/GSM96nnn/GSM96621/suppl/GSM96621.cel.gz"	"ftp://ftp.ncbi.nlm.nih.gov/geo/samples/GSM96nnn/GSM96622/suppl/GSM96622.cel.gz"	"ftp://ftp.ncbi.nlm.nih.gov/geo/samples/GSM96nnn/GSM96623/suppl/GSM96623.cel.gz"	"ftp://ftp.ncbi.nlm.nih.gov/geo/samples/GSM96nnn/GSM96624/suppl/GSM96624.cel.gz"	"ftp://ftp.ncbi.nlm.nih.gov/geo/samples/GSM96nnn/GSM96625/suppl/GSM96625.cel.gz"	"ftp://ftp.ncbi.nlm.nih.gov/geo/samples/GSM96nnn/GSM96626/suppl/GSM96626.cel.gz"	"ftp://ftp.ncbi.nlm.nih.gov/geo/samples/GSM96nnn/GSM96627/suppl/GSM96627.cel.gz"	"ftp://ftp.ncbi.nlm.nih.gov/geo/samples/GSM96nnn/GSM96628/suppl/GSM96628.cel.gz"	"ftp://ftp.ncbi.nlm.nih.gov/geo/samples/GSM96nnn/GSM96629/suppl/GSM96629.cel.gz"
!Sample_data_row_count	"54675"	"54675"	"54675"	"54675"	"54675"	"54675"	"54675"	"54675"	"54675"	"54675"
!series_matrix_table_begin
"ID_REF"	"GSM96620"	"GSM96621"	"GSM96622"	"GSM96623"	"GSM96624"	"GSM96625"	"GSM96626"	"GSM96627"	"GSM96628"	"GSM96629"
"1007_s_at"	20295.521	18387.34	17643.07	19042.041	23075.598	22892.338	23845.404	8857.063	9473.635	10661.707
"1053_at"	1783.2793	2757.2842	1744.8898	1632.653	2692.8599	1713.0605	2357.2222	5809.607	8253.409	1607.9473
"117_at"	1010.40955	832.0749	1395.773	978.9311	1032.125	1188.472	1083.8792	446.76282	676.524	549.8768
"121_at"	5836.45	3842.0354	6117.8354	4315.7344	6611.3887	4313.4204	5402.8086	5372.6304	5269.697	4053.9988
"1255_g_at"	164.62845	98.23133	88.426056	322.77136	173.07635	58.763237	86.159645	178.5586	87.68159	52.67655
"1294_at"	2723.1477	1504.2385	3025.9941	2104.7605	3000.1328	2299.241	2722.4795	2909.654	3498.4316	1078.2976
"1316_at"	1082.9347	630.9058	1081.4375	665.06976	1103.9742	730.6094	1238.4799	567.0103	477.13297	780.09
"1320_at"	96.99578	70.493034	207.21017	104.14952	227.84456	74.61562	180.09935	1255.889	813.78046	66.77662
"1405_i_at"	26.449888	40.93596	57.486076	53.843243	84.00751	54.640118	83.28633	17.07877	80.47832	38.674503
"1431_at"	245.75331	267.7028	377.25708	573.1144	435.90738	368.71255	449.35477	200.47679	474.98376	348.01923
"1438_at"	128.31476	321.4138	134.64398	615.6339	130.32568	470.75345	490.5147	1690.5977	1123.7627	112.7513
"1487_at"	2331.3884	2846.2664	2278.633	2563.152	2650.668	2243.9885	2545.1013	2418.4624	2342.043	2029.2094
"1494_f_at"	1057.1699	930.6266	1152.3495	749.1291	1534.7477	868.8355	1403.7811	330.88092	859.1483	639.85004
"1552256_a_at"	3479.178	2333.9895	2852.7793	5083.058	3662.6812	4845.6846	3745.2888	5971.3066	6468.1035	3166.3037
"1552257_a_at"	16208.729	7692.355	15933.976	8318.792	9468.846	12302.981	9602.563	7066.3003	8650.028	3024.8547
"1552258_at"	170.43953	457.7235	1151.2577	611.4326	192.98518	1068.329	233.62515	860.65344	1479.5387	738.5936
"1552261_at"	173.39272	278.38382	776.5452	259.02286	876.7185	831.3933	771.4962	502.48233	308.11502	398.80017
"1552263_at"	790.24384	912.44714	483.24927	47.743603	303.8043	79.62933	422.87738	1129.9142	1040.8617	1140.9971
"1552264_a_at"	3502.8755	3532.6992	1845.711	3023.136	4766.44	4225.2783	4626.735	5912.3276	6783.9814	1960.8916
"1552266_at"	622.1483	119.98744	390.40695	465.6989	1261.684	715.68866	505.57666	406.5173	338.52927	721.2191
"1552269_at"	1194.9406	1130.7015	568.6262	573.55115	121.17212	873.00195	454.44812	134.0943	59.484882	214.47322
"1552271_at"	189.54395	85.23841	251.28761	243.3708	362.33575	287.91068	278.52655	363.15732	161.26459	62.111755
"1552272_a_at"	1306.1573	625.4803	1261.4209	1204.7699	1658.0095	1337.3962	959.95245	633.6818	738.5481	434.67764
"1552274_at"	5978.56	1753.7042	3656.593	4130.8716	4068.05	3789.5002	3855.0095	4062.9067	2490.1946	3390.8748
"1552275_s_at"	2290.774	1195.4701	2262.7583	4228.053	4293.3843	2202.868	3274.7773	2031.3734	1904.0702	1489.2252
"1552276_a_at"	1447.771	169.21817	861.02545	660.6882	1360.2223	1739.1562	1355.5906	614.6173	2417.0972	1232.8502
"1552277_a_at"	2469.1282	4263.1733	3409.0642	4291.04	4358.9414	3911.5815	3645.7563	13276.205	10558.716	3201.0862
"1552278_a_at"	3468.359	5251.085	2176.3232	2666.4604	2208.601	2907.0708	2255.3076	780.1253	1130.0311	3258.9724
"1552279_a_at"	4940.189	3343.3582	4274.384	4367.1084	4873.6567	4214.3813	4583.617	1999.5383	2397.5627	4894.3765
"1552280_at"	381.66562	267.95987	306.93204	310.26428	266.3688	247.54413	355.2506	217.77226	215.35176	463.21463
"1552281_at"	915.9547	906.29486	1066.1067	923.069	1186.3911	1356.7452	1219.0261	768.3201	1349.8783	894.06384
"1552283_s_at"	2388.4849	3272.5225	3344.8862	2737.2917	4392.9644	2838.7021	1455.9158	397.21326	544.24347	5084.3003
"1552286_at"	1542.637	2049.4814	1676.8163	1161.7341	1382.6189	1437.2046	1749.6346	859.9656	1160.6731	528.7644
"1552287_s_at"	1935.2703	1976.8732	1223.6484	1672.9937	2208.3403	1734.5546	1537.7922	4132.304	3375.0227	3171.506
"1552288_at"	385.82996	347.40805	630.4643	408.69696	429.65274	616.004	177.6909	232.82513	229.22589	297.50998
"1552289_a_at"	394.47394	108.170204	587.221	411.51254	577.2426	698.9701	520.21124	612.51556	484.38245	860.9798
"1552291_at"	3122.8176	3782.5244	3105.8071	3097.7593	2226.6538	2226.3955	3179.541	1853.5139	1208.4338	3788.6619
"1552293_at"	2422.6091	630.3279	2496.6465	771.89716	339.5489	902.72705	2156.4202	115.72413	60.368336	3293.687
"1552295_a_at"	6432.0444	5429.6353	5551.861	6824.105	5719.828	6126.4966	6271.833	12155.228	15376.662	9860.569
"1552296_at"	1258.0374	96.265076	1055.0361	1315.6287	829.2665	1579.6267	1134.5708	70.83957	58.057983	55.35615
"1552299_at"	1395.9497	907.1208	1454.3329	1249.5538	1919.8701	2049.3574	1281.7461	838.4119	822.9175	802.08014
"1552301_a_at"	1684.0215	966.1672	1854.7446	1345.0616	2715.889	2026.2288	1560.3942	1227.2114	1267.6595	1633.8252
"1552302_at"	417.57895	18.65308	134.3203	19.638927	619.14087	278.12982	234.0872	353.99805	404.46292	313.24677
"1552303_a_at"	1114.9788	985.0734	1371.0305	685.01514	1594.922	1099.6327	813.9317	1404.3777	1426.7769	1375.6145
"1552304_at"	638.5417	394.3778	171.88312	841.5868	525.6894	254.08862	880.0339	388.82584	250.05675	291.71378
"1552306_at"	548.71936	986.42194	690.6217	504.4466	364.31104	252.03743	529.29285	998.7028	429.16153	970.9788
"1552307_a_at"	151.54973	2560.51	915.1477	137.9709	83.67118	366.15424	495.4881	996.5631	966.55865	7609.567
"1552309_a_at"	90.96506	373.81995	125.66867	62.732136	104.83893	219.39017	667.29724	2391.6543	3583.3372	349.80777
"1552310_at"	4333.2637	2532.9927	5395.1074	5085.0947	4509.4956	3913.0063	3263.9592	2419.9065	2050.6997	5262.248
"1552311_a_at"	1205.5778	639.6582	1380.8153	1239.1283	1158.0891	488.35977	1150.8529	1255.2076	1184.5645	787.3921
"1552312_a_at"	506.37665	1084.0537	774.22235	749.0652	895.78253	1043.0157	761.2497	2624.727	4721.3384	577.01556
"1552314_a_at"	1036.0869	446.17075	920.7746	1759.2952	1676.1377	1387.9777	711.0177	1572.836	1588.9951	770.851
"1552315_at"	898.0544	716.0749	410.1096	371.0724	1219.3763	1032.6511	1179.4984	247.57622	362.0744	414.10135
"1552316_a_at"	769.27734	719.3987	654.15045	561.5437	515.6306	568.86237	1013.78424	56.89613	553.5318	409.56512
"1552318_at"	306.90094	455.30435	233.3354	58.576637	457.83545	289.35812	681.50085	51.937115	398.77054	463.63324
"1552319_a_at"	868.2598	841.5088	848.75275	690.36884	317.68234	479.12524	1149.6041	294.93518	208.03352	591.5561
"1552320_a_at"	493.37457	495.33963	853.71826	366.6655	574.2918	709.9458	591.2999	96.71303	134.7178	256.65656
"1552321_a_at"	82.832634	654.41504	84.43867	305.21103	134.09586	534.0847	124.0062	50.220524	38.004345	17.660278
"1552322_at"	161.69571	299.8987	273.45828	361.28357	549.2912	551.3059	235.42932	315.8073	148.64996	125.586266
"1552323_s_at"	780.7228	448.35995	800.1003	365.326	472.98212	1088.5175	617.41534	520.3974	521.2958	279.13776
"1552325_at"	217.93051	535.9623	271.27798	276.2273	112.193115	1020.11475	482.96716	225.30081	337.6148	467.70587
"1552326_a_at"	1312.5701	2782.3691	1132.9604	1872.8225	2423.447	2056.1284	1115.1948	64.975494	177.99126	1313.0338
"1552327_at"	1417.1211	1157.8463	1234.5038	1213.3713	2475.463	698.0639	250.46909	426.88434	32.161335	4561.9854
"1552329_at"	1337.6644	1740.5844	1080.5907	1689.7402	2301.1956	1654.7258	1552.5254	695.0966	639.5867	965.76306
"1552330_at"	2694.716	3924.2036	2706.3867	3036.4426	2723.3784	2366.738	2086.715	1061.1232	1206.4628	3260.666
"1552332_at"	943.0475	645.1014	582.4045	2609.8904	774.88824	845.4071	479.4254	2372.1458	498.75073	113.01893
"1552334_at"	1015.02203	548.9974	474.5486	1080.5249	555.7419	986.57965	388.88602	1458.2219	1103.826	70.92973
"1552335_at"	238.49393	73.21181	104.3698	252.52905	192.74088	365.54587	68.47832	512.4593	514.2608	69.11904
"1552337_s_at"	45.15937	19.039164	39.38331	124.4148	48.407616	51.096466	43.125057	23.542356	375.98416	97.46907
"1552338_at"	44.319424	27.854103	53.27757	45.52659	54.754944	48.46573	58.825985	25.914389	34.92716	20.84062
"1552340_at"	67.87304	335.8857	125.9945	86.271965	105.44065	144.07304	56.72536	43.67758	374.20126	262.73892
"1552343_s_at"	333.7239	258.80896	534.6707	368.38788	539.0627	704.28925	269.76978	490.4645	670.649	697.45245
"1552344_s_at"	3597.1199	6863.44	2131.9163	4722.1978	4569.865	3550.785	3247.9302	3595.345	3102.7283	2475.9238
"1552347_at"	2306.5264	1835.7944	2993.6575	2871.545	4576.994	2658.7385	2594.4663	2072.8408	1547.8132	2368.3557
"1552348_at"	140.70021	170.25717	246.17969	891.98303	488.628	194.00285	1032.6996	202.56824	285.91092	123.948425
"1552349_a_at"	772.2998	398.15228	304.1531	784.09753	80.01141	710.93506	665.2774	428.9385	467.37433	167.24146
"1552354_at"	93.51907	47.290836	80.928925	98.83583	115.85677	52.512836	85.97041	26.061872	93.00621	77.79656
"1552355_s_at"	138.46788	134.6763	109.61945	71.53938	190.62419	167.82924	168.45924	46.305378	79.43921	109.13727
"1552359_at"	232.411	21.076056	67.24872	56.864784	22.19479	346.9488	119.88849	247.69498	103.67716	79.76982
"1552360_a_at"	808.0624	308.90048	1074.9496	485.5273	1033.694	532.4579	912.98395	744.7824	191.09692	669.3658
"1552362_a_at"	553.45435	559.86334	720.26245	606.58984	772.6012	176.30304	676.4578	799.6795	308.1688	1180.4686
"1552364_s_at"	2026.0076	2385.5688	1470.4437	1235.3179	1175.1324	1048.8231	1262.8125	1447.5408	1431.3372	3179.5688
"1552365_at"	68.753426	305.6294	317.1402	848.3037	17.738642	408.28915	873.24023	17.118414	56.12742	497.19794
"1552367_a_at"	19.129185	22.340578	27.59434	31.805944	28.2349	70.309555	45.689083	38.921696	35.82	32.899673
"1552368_at"	234.9823	444.30035	348.36844	110.662544	618.40894	772.45355	250.0057	116.189545	224.87337	381.65094
"1552370_at"	2270.4963	578.6109	1468.8883	2710.1934	2330.592	1603.0719	2238.7021	702.7043	606.0298	1394.8334
"1552372_at"	89.394936	112.256096	55.124454	235.5446	276.0135	198.4392	277.02795	159.50336	81.86078	77.23484
"1552373_s_at"	63.128147	254.0155	50.730732	146.35527	81.37975	18.48677	384.77353	62.82833	90.96458	358.46707
"1552375_at"	526.14716	888.1391	474.69656	836.9094	466.37183	831.123	720.1466	207.9322	267.41196	431.66275
"1552377_s_at"	1484.4696	1791.1691	1359.2924	1002.351	2763.1145	1907.2013	1677.6462	2142.0063	1528.6514	2527.4792
"1552378_s_at"	220.63007	1925.0966	79.2478	82.17336	58.178596	65.215195	54.677567	119.81124	209.60146	2119.3171
"1552379_at"	208.58395	146.07744	325.9534	131.59723	336.25824	202.975	7.8175035	9.506116	193.72061	15.308152
"1552381_at"	1461.1311	587.50745	1080.7339	1475.3942	1308.06	2094.463	854.2315	603.6167	58.42371	583.8408
"1552383_at"	516.25195	1173.5392	201.76352	475.8107	472.02777	1515.4991	405.6514	1600.7013	1212.6301	428.49908
"1552384_a_at"	760.33527	385.45645	894.9018	486.3088	432.12708	803.3713	596.64996	496.83292	618.4447	382.3044
"1552386_at"	408.30908	244.69965	678.3262	376.36407	109.45356	363.4165	718.1773	238.28621	133.87114	31.615139
"1552388_at"	233.08603	321.6171	181.66185	147.90149	273.2467	154.62663	242.94893	108.424286	221.7274	159.16931
"1552389_at"	100.83649	140.72746	297.88687	481.73013	593.3556	848.1171	440.10464	502.62836	422.3152	64.27868
"1552390_a_at"	880.1199	282.27737	953.80835	1945.4332	1300.3192	1559.3683	954.3974	1153.1519	518.7943	127.77351
"1552391_at"	196.30748	439.08878	527.3537	356.08435	181.51968	589.27576	177.10835	530.77136	622.86084	319.12418
"1552393_at"	5.0824723	166.73003	39.560192	45.740837	296.90366	54.4103	28.80676	20.905754	45.81863	124.48427
"1552394_a_at"	218.05145	219.68939	67.67583	26.96181	40.89131	257.9828	266.65744	148.89627	44.679665	120.545456
"1552395_at"	159.5118	99.42507	196.20831	114.81574	179.28029	107.94787	391.75967	76.37948	142.66293	102.60574
"1552396_at"	238.50937	427.99094	153.0052	307.68246	446.12897	309.34665	321.95856	200.78996	271.61475	462.18524
"1552398_a_at"	235.1175	51.84836	598.40375	124.675865	36.252674	78.05353	135.49565	367.0474	206.02284	89.904755
"1552399_a_at"	658.46014	448.0481	579.4431	658.0748	1266.1836	584.3506	819.7137	537.5074	544.7387	598.4511
"1552400_a_at"	1062.7075	653.6063	1386.9806	701.703	1077.9945	987.55707	746.91315	425.35947	427.43787	1031.5726
"1552401_a_at"	187.9476	52.39239	366.6208	32.676567	101.53334	55.35195	31.910109	322.88113	344.08755	47.3901
"1552402_at"	69.29829	67.83199	154.3731	226.5618	332.8295	173.79366	606.42773	256.07022	368.66855	45.44517
"1552405_at"	114.57485	201.79749	401.26526	453.63586	612.49097	608.4746	275.321	61.810215	213.44652	292.26642
"1552408_at"	34.258785	14.058158	36.732964	33.892403	35.837273	233.42555	20.665672	108.33133	173.9213	12.77454
"1552409_a_at"	223.08673	142.32243	204.1777	84.72993	586.3884	165.85544	136.45018	367.09338	75.989075	125.946106
"1552410_at"	575.8226	1728.9255	462.4012	446.42096	609.6373	628.66473	968.08466	430.18307	794.62756	299.26993
"1552411_at"	1504.2448	1364.7911	2039.661	1351.0074	2465.3562	1306.8894	2337.6836	721.9668	1719.5852	1875.0621
"1552412_a_at"	280.27246	79.85849	332.87933	323.90527	67.418564	156.83537	343.19067	68.41392	198.42842	38.347332
"1552414_at"	546.94257	110.81891	692.3805	311.6178	714.3353	595.2684	765.65436	231.29771	739.61456	505.92194
"1552415_a_at"	1121.1678	543.6556	1069.0906	728.39636	1653.4318	632.3728	1052.3033	921.22473	174.31953	894.15106
"1552417_a_at"	315.67184	20.06251	48.856968	614.1328	642.22614	181.72519	125.27176	1875.478	1906.5918	335.77438
"1552418_at"	76.7018	92.946175	428.04477	160.38261	99.92911	103.81957	57.42065	89.81286	118.051414	93.57289
"1552419_s_at"	832.59686	854.20276	604.2665	605.0938	1538.052	312.45898	1709.1237	640.3438	768.25775	702.1946
"1552421_a_at"	111.177505	123.406235	146.42142	128.6142	63.160595	107.5947	57.88533	36.62458	137.01381	25.052765
"1552422_at"	293.30338	127.29305	238.09773	146.03061	686.1455	355.30826	396.2756	937.8441	644.45874	306.2913
"1552423_at"	1001.8466	604.19006	1435.151	893.6128	2213.7095	1000.60675	994.7635	1289.4866	908.3643	723.25385
"1552424_at"	88.847496	42.34507	78.625854	56.72389	450.77374	137.18106	204.37012	39.98916	44.15244	41.169426
"1552425_a_at"	1108.7615	762.6857	732.7963	643.45325	1065.1259	743.2694	603.5684	69.85088	71.223885	292.879
"1552426_a_at"	13328.654	9717.971	11273.108	11842.645	10701.416	12699.585	10210.743	6396.0664	5901.85	21926.623
"1552427_at"	39.67386	353.25745	169.25793	203.81308	75.270874	171.06242	204.26285	465.5056	45.213833	181.08575
"1552430_at"	2757.7075	4209.082	2854.4685	1604.609	3050.649	2001.8505	1465.8368	337.27753	321.91928	3079.9082
"1552432_at"	114.75192	109.456566	107.12193	114.36085	156.41974	125.235535	211.3509	86.20811	121.67812	93.170006
"1552436_a_at"	49.064854	29.706232	83.327515	49.214146	88.75923	80.092285	84.88207	45.131176	46.16565	33.118065
"1552438_a_at"	860.52405	387.35962	573.35486	565.85785	836.41675	634.7452	1119.519	195.78407	422.64877	587.1482
"1552439_s_at"	79.68721	35.227657	98.64901	1702.2216	696.0315	62.512253	69.64183	51.547474	34.114166	20.577099
"1552440_at"	395.66782	293.0995	956.56287	567.0319	1023.51935	506.72125	436.71017	451.30124	585.337	679.8762
"1552445_a_at"	330.6581	60.34286	500.89087	89.74897	451.48468	285.3488	111.315895	458.46317	393.84354	101.84317
"1552448_a_at"	226.87907	53.75568	28.840662	23.56429	106.285614	70.35811	73.29671	71.19366	19.652359	42.742622
"1552449_a_at"	20.816631	40.520493	82.99965	40.380283	70.28305	68.951706	75.932724	21.302456	30.233387	75.226395
"1552450_a_at"	1002.78546	911.40845	1637.2316	260.58923	1440.634	977.7203	1095.5891	536.06537	531.0139	701.01013
"1552452_at"	136.05197	36.73663	105.704	36.73184	107.089485	82.725655	72.660995	120.92912	134.2267	69.42288
"1552453_a_at"	44.18706	23.809706	49.486984	29.107452	84.63554	55.848724	49.151882	17.138605	35.55127	25.273352
"1552455_at"	798.1016	1027.5918	521.0611	638.22394	865.6593	481.77112	718.4201	410.14096	371.60117	6228.317
"1552456_a_at"	426.66684	98.21252	195.60461	55.621502	119.804825	468.28677	210.02472	245.22815	557.85785	486.3887
"1552457_a_at"	743.14655	446.4327	434.35843	64.82115	76.98947	686.4072	706.2746	322.309	487.19482	1259.6038
"1552458_at"	41.13069	20.116877	282.8108	138.24123	275.65402	540.1027	64.038	163.54616	324.75824	230.10326
"1552459_a_at"	78.09875	80.321304	311.59836	295.51248	865.20844	382.46295	501.00912	479.78424	71.23013	653.2723
"1552461_at"	243.12338	180.33492	403.43207	213.35437	468.811	131.87582	563.7596	205.8072	60.805214	179.09283
"1552463_at"	313.85394	283.17352	558.92645	324.09555	366.93506	368.17758	339.78223	326.89655	304.9119	482.9471
"1552466_x_at"	52.28313	14.459729	241.34546	24.549395	53.029232	34.793697	18.432014	102.48171	23.446844	17.33858
"1552467_at"	290.85614	964.284	972.8029	634.8038	219.93199	466.58392	425.34744	116.347244	268.2319	1115.1552
"1552468_a_at"	938.338	183.06273	265.5648	790.23	959.82465	714.0069	309.12372	474.07324	762.15826	259.57684
"1552470_a_at"	379.46567	639.3266	36.87608	506.7281	621.7897	533.2525	688.5297	538.0215	544.1796	445.601
"1552472_a_at"	2914.4424	2693.9294	1977.6584	1060.8683	2174.0947	1961.1532	2270.287	3874.6936	2583.9812	1245.2001
"1552473_at"	1713.3634	1209.3247	1219.4508	1613.7747	808.6896	486.46545	333.16562	1082.9518	1657.5693	498.384
"1552474_a_at"	8708.467	5714.751	12603.009	9936.225	10719.342	10042.253	13775.679	5685.889	3962.0842	6597.559
"1552476_s_at"	3218.5435	1513.8901	4519.6196	2960.657	5152.8594	4199.3877	4889.7754	2841.2737	2893.5105	155.03749
"1552477_a_at"	4358.331	2320.5784	4615.26	5524.4224	8644.952	5460.819	5931.8887	335.98456	450.55463	650.7062
"1552478_a_at"	1448.2744	609.6456	1304.3381	1745.2927	2473.2852	2031.4181	1385.3088	81.75701	481.44003	361.8407
"1552480_s_at"	144.46545	52.8799	32.849213	8.725702	38.038036	13.052625	124.12984	147.9894	27.43305	12.600035
"1552481_s_at"	988.3106	676.1231	1070.114	1144.2964	2453.3064	1353.792	1493.529	872.15845	1158.8308	821.1749
"1552482_at"	692.6526	479.1671	638.6437	388.52277	760.891	479.73358	590.72253	1002.12506	541.8466	1346.7351
"1552484_at"	256.08017	322.24304	977.19135	129.88774	337.3365	511.13928	231.99417	321.59476	728.67206	169.17255
"1552485_at"	693.2595	413.1251	707.0231	600.34607	876.68866	457.64465	779.82153	1690.0905	1689.7081	405.237
"1552486_s_at"	394.6411	691.487	684.2065	713.5103	415.06552	793.6281	945.0214	2093.1462	1848.3729	480.67642
"1552487_a_at"	24.994179	4.74282	37.93441	19.926882	23.572186	11.279547	20.190443	3939.6575	2549.5527	26.144213
"1552489_s_at"	144.79967	124.99219	322.93903	16.86621	109.670906	46.52712	160.71236	548.66876	570.47144	134.88507
"1552490_at"	653.937	422.24503	1083.5294	712.14075	817.9606	836.32336	493.48535	550.39825	691.3085	558.70306
"1552491_at"	133.11505	143.03096	791.4915	398.80582	833.45245	671.95654	610.0818	80.24603	168.66281	385.65872
"1552493_s_at"	38.744656	56.661125	139.06761	44.009598	82.318756	180.96613	71.88094	57.152607	93.29361	32.229218
"1552494_at"	190.45007	22.310802	218.73349	169.28452	51.090508	286.7904	47.008263	198.35577	70.57046	56.309486
"1552496_a_at"	1950.9923	433.12057	2187.7039	681.19745	502.9154	2966.6943	442.98517	27.750633	70.34723	35.25558
"1552497_a_at"	1694.395	1047.5576	2680.135	1374.9727	1519.4595	1217.1348	2798.4397	354.9598	1040.9054	1413.8424
"1552498_at"	784.3355	604.54926	1435.2444	657.8085	1477.3091	104.63794	1102.9125	142.61218	527.11865	167.0505
"1552499_a_at"	671.5797	690.6141	574.5076	561.26855	898.0883	444.0926	720.3753	412.76425	529.0908	632.0582
"1552501_a_at"	115.20672	1923.0856	101.49919	120.86909	119.97901	152.23589	73.026436	110.79957	181.89917	331.4354
"1552502_s_at"	486.00128	719.11725	849.0291	1046.0348	1061.0852	531.24725	465.8597	1303.8505	977.18164	334.58725
"1552503_at"	638.38745	418.62	895.43854	294.64017	658.9501	709.5787	204.63312	283.84924	278.1941	605.6428
"1552504_a_at"	1187.981	1871.5334	1304.1855	1943.484	874.38745	1508.8239	1762.1755	688.6648	309.65823	3434.3809
"1552506_at"	1805.1144	568.793	830.8074	843.6914	662.2411	252.1436	2106.3152	303.12863	55.59952	114.302666
"1552507_at"	180.36578	573.76025	54.06267	318.61313	144.70639	416.19296	180.09637	186.89609	347.0316	479.35944
"1552508_at"	57.66612	280.6854	376.094	392.47064	377.35373	456.1971	546.6231	268.27173	502.32318	76.611885
"1552509_a_at"	337.3021	562.9678	887.651	266.75955	705.86615	47.229805	867.81354	418.83743	30.61102	820.5317
"1552510_at"	2601.1953	2361.147	1931.6969	2079.7178	3979.0002	2138.6816	3733.4697	1805.7838	1807.2058	1826.942
"1552511_a_at"	41.32226	19.325373	32.02008	62.41044	84.3408	399.7571	66.92496	22.781904	27.799704	23.044374
"1552514_at"	637.57495	299.1383	702.60144	965.44775	752.6802	49.077515	139.36957	36.593246	221.91382	37.427822
"1552515_at"	609.4604	629.9678	356.18082	457.00537	979.7472	68.88898	365.32678	394.52344	75.34754	190.56242
"1552516_a_at"	8314.757	9687.589	5430.2427	7893.9253	11409.2295	9779.387	6759.2188	6242.909	6251.068	3289.28
"1552518_s_at"	309.0449	371.94812	507.43304	368.45654	444.48203	72.371445	251.78998	1142.4813	922.29944	564.34717
"1552519_at"	2313.5813	30367.854	7250.26	7266.491	18591.785	4229.5356	9399.385	225.22858	239.1159	1458.9601
"1552520_at"	1504.3695	755.91034	1890.4681	912.5094	2144.586	1056.0074	2698.49	360.58475	590.74304	870.3253
"1552521_a_at"	248.32741	244.58092	458.59448	234.59389	288.99496	102.56048	142.99214	20.72916	10.983546	26.22298
"1552522_at"	626.0763	137.81056	786.1733	625.74445	476.44998	266.8642	302.39603	190.5639	313.36374	813.57196
"1552523_a_at"	1138.206	522.70294	1333.0813	1297.0096	1271.1824	852.3819	1064.1913	545.02045	750.8958	861.7875
"1552524_at"	589.06696	100.21661	112.91928	81.076126	157.69359	208.92226	110.82059	102.15342	112.99815	89.57052
"1552526_at"	114.30553	55.0853	459.44498	113.24869	158.36627	384.09637	157.45782	74.024254	139.58203	195.5974
"1552528_at"	198.44473	309.61108	249.2788	110.419304	292.89856	88.56453	161.31235	48.08484	326.1157	32.448696
"1552531_a_at"	53.365757	205.20963	90.84572	75.4016	86.49433	281.85153	116.14348	176.4407	67.066086	373.00726
"1552532_a_at"	350.926	314.03513	112.34799	388.95782	190.6888	284.48297	69.54774	121.01707	538.3919	18.621101
"1552535_at"	503.78363	369.99414	654.6806	214.70836	440.16183	900.6811	283.94476	114.35519	123.54523	356.5611
"1552536_at"	1105.5248	749.8744	1014.95935	749.8353	979.4267	227.05731	767.67975	471.33362	590.3483	1114.8254
"1552538_a_at"	95.439964	380.89114	192.22626	355.99634	494.77948	389.29794	49.945282	69.532394	43.364388	109.119415
"1552540_s_at"	918.4764	1644.4991	1609.159	1388.1368	1010.2136	1384.5962	876.72107	584.6061	1487.0529	755.71454
"1552541_at"	205.01587	649.4026	1150.213	490.5615	905.41907	909.55676	1289.6544	778.5839	187.35847	766.7734
"1552542_s_at"	43.676117	126.242065	398.5858	355.9562	132.02382	84.31786	451.97034	52.407227	442.0094	266.55008
"1552543_a_at"	1312.1771	957.1332	2056.4885	1455.7689	1910.5691	1519.9918	1918.1619	314.50732	310.01477	714.2901
"1552544_at"	526.7217	110.29688	777.6085	196.96637	903.7048	588.134	1351.9694	104.17864	234.46494	77.29494
"1552546_a_at"	137.87585	1272.3602	778.82855	1066.2699	301.83365	412.9263	1382.0833	989.5366	1384.76	838.0801
"1552548_at"	155.17697	172.0396	103.20973	373.98483	105.759895	101.422005	321.9959	163.9329	40.29901	282.4945
"1552549_a_at"	561.89746	213.65965	747.9578	212.22025	207.86853	429.36084	250.80513	419.09888	321.84348	36.80363
"1552552_s_at"	495.71347	370.692	218.85063	614.4039	535.7266	505.2307	479.62674	193.98386	490.45798	167.12126
"1552553_a_at"	626.00574	55.2169	433.70285	80.50434	543.29395	131.05482	371.4019	142.72977	33.15295	272.04187
"1552554_a_at"	145.67229	286.91275	186.70172	90.11825	600.0042	134.5935	288.4114	29.853376	245.60739	22.335901
"1552555_at"	298.8522	255.33992	231.21466	871.53577	303.5577	373.00275	339.23306	141.79979	52.204063	126.14245
"1552557_a_at"	918.2372	604.26337	532.00806	578.8277	732.9204	873.6133	696.27625	204.57108	531.2892	701.16974
"1552558_a_at"	1257.2263	1396.7687	2065.5212	2341.3562	2452.623	936.14026	1610.244	1280.2543	1892.7172	1333.8763
"1552559_a_at"	105.5142	184.18932	227.22986	89.16682	161.68156	59.562973	90.82395	138.83783	180.45422	57.382526
"1552562_at"	1082.6527	1009.61523	1420.5106	682.365	794.9494	1170.477	784.70135	385.3944	438.50458	814.051
"1552563_a_at"	117.951324	272.33484	36.2624	33.666557	111.797676	137.515	177.34879	381.33936	173.11703	1443.2083
"1552564_at"	240.21478	569.7089	515.69403	223.57008	838.1736	557.6564	131.83357	123.20024	122.53006	484.21286
"1552566_at"	75.97419	23.58782	79.68861	25.896545	87.58495	63.96543	128.94739	21.87311	42.080063	17.241493
"1552568_at"	144.0739	142.69783	219.23839	47.94517	44.448948	52.105755	42.038998	31.682848	137.1511	33.060257
"1552569_a_at"	174.87326	484.3663	228.59256	83.64166	113.39624	68.60833	324.91147	226.32556	107.06644	55.89388
"1552570_at"	956.60486	453.46777	787.28906	620.015	679.9763	770.0246	640.2386	224.49756	248.9645	980.80426
"1552572_a_at"	21.252895	179.42972	157.86646	319.1306	184.57555	537.4299	106.95031	235.95644	226.66208	378.5384
"1552573_s_at"	770.9769	681.58295	770.5317	722.64624	740.6656	556.6581	907.047	502.05304	378.40646	950.8067
"1552575_a_at"	835.5355	383.74554	422.1695	675.0042	936.64545	831.4238	1091.5466	808.8164	401.1283	507.02676
"1552576_at"	736.7933	760.8792	895.12634	736.4797	974.28894	253.86856	607.63196	333.43954	1006.292	1074.1508
"1552578_a_at"	3428.1733	660.9508	1586.1259	2302.265	4270.882	2999.4336	4034.666	231.71567	426.62152	1495.8938
"1552579_a_at"	634.44617	452.19977	940.0094	962.84845	862.5362	1380.0685	707.8069	945.2903	759.3484	489.94623
"1552580_at"	27.335035	162.22275	72.268875	67.07411	79.078255	429.8848	84.52514	372.37964	393.44803	116.585205
"1552582_at"	78.11327	321.27435	378.85574	304.5655	198.57693	28.833868	322.59076	25.132505	64.484604	149.18806
"1552583_s_at"	425.60925	74.11886	218.04692	209.7787	334.25586	135.45705	988.2238	231.77316	124.17218	262.36148
"1552584_at"	27.304892	406.37125	719.0406	481.39557	231.02501	626.7101	546.29144	483.8428	108.173645	317.55396
"1552585_s_at"	372.22705	246.35252	609.9056	444.23434	514.7528	380.8409	698.46436	96.31871	352.9566	380.31757
"1552586_at"	1130.6124	855.99036	1179.8654	984.3025	334.96594	1108.7114	1060.3022	883.0628	1793.7335	707.29785
"1552587_at"	626.03864	620.5925	916.9743	508.18457	1052.4562	348.23364	1167.9508	30.808722	339.5912	267.13187
"1552588_a_at"	89.71738	260.46936	255.47345	89.347374	412.2717	46.257763	150.61252	238.86974	349.7684	55.390614
"1552590_a_at"	105.09648	193.60086	117.20863	381.05942	419.4002	513.9998	559.2476	33.35347	40.958294	146.31952
"1552592_at"	34.522415	408.58752	417.6923	209.31833	37.051136	36.663948	80.2907	107.06474	259.31976	66.6484
"1552594_at"	678.2071	686.1222	1911.1874	410.60703	2370.0554	4518.25	3661.9946	375.4388	645.9853	259.84467
"1552596_at"	227.74812	165.81168	717.9098	224.37114	1699.2649	233.98418	298.44458	124.12614	190.55946	172.99066
"1552598_at"	690.3234	631.2573	1181.2485	240.72192	1418.8182	883.2325	99.86467	464.68042	543.9298	740.184
"1552599_at"	469.136	409.40402	680.8752	710.1029	398.05658	929.1872	577.91345	465.93124	587.78107	279.682
"1552602_at"	1122.8492	622.02094	1297.8864	744.5317	1707.6567	1000.4156	747.86865	481.35577	1022.3634	544.8168
"1552604_at"	415.21835	341.77667	746.89417	702.7182	565.6389	710.6038	887.7067	324.5598	237.49216	398.28156
"1552605_s_at"	675.2647	496.4158	231.85622	663.5067	141.75569	215.01848	270.96356	147.2325	556.5058	195.69254
"1552607_at"	477.27942	827.8611	357.13776	704.3033	506.79315	502.14587	632.18494	97.12355	231.6815	453.51712
"1552608_at"	677.5497	64.705986	98.28647	252.61047	140.0446	37.071777	62.24533	55.293324	107.56925	68.91867
"1552609_s_at"	232.92133	94.45516	199.57367	271.85898	138.76028	327.22794	401.9368	256.33646	415.734	334.5973
"1552610_a_at"	7127.8594	11222.368	3298.084	13358.493	8963.352	7113.903	6139.0967	15568.59	19265.36	5704.2607
"1552611_a_at"	2691.2197	3319.5173	2544.714	5190.7935	3742.651	2773.8809	3886.0024	5260.4917	6721.4355	2984.3083
"1552612_at"	3109.477	5981.192	1973.1984	2411.597	3186.5195	2409.9314	3197.795	2903.926	2528.6611	2136.165
"1552613_s_at"	1660.1561	4584.051	712.2502	909.9553	746.0183	636.88403	1019.4797	1760.9956	1211.2286	896.4248
"1552615_at"	2518.3667	3963.2056	5299.4	3668.8708	5453.178	4004.1338	5214.8	1371.5817	2413.3147	3009.5435
"1552616_a_at"	496.85168	736.7077	785.16547	559.67694	1104.848	652.31696	696.5564	452.57166	167.57884	1203.675
"1552617_a_at"	8847.447	8485.161	11905.273	7473.4966	11547.267	11342.595	8225.349	7946.1455	7496.2817	5189.2954
"1552618_at"	2062.8843	2034.2404	2733.9917	2344.935	2490.198	3033.207	2040.6409	4963.6494	4519.883	1235.4152
"1552619_a_at"	249.95876	449.41513	55.710037	565.9781	135.41736	557.68384	351.26022	30774.988	29343.54	5342.7075
"1552620_at"	2073.9277	1627.45	2785.941	2305.3237	3531.1746	2187.1372	3428.6257	1225.4834	1373.03	2324.8784
"1552621_at"	2108.5474	2156.7883	2184.316	1543.9963	2851.6663	2015.8181	1331.7369	4736.849	4785.929	11010.357
"1552622_s_at"	1468.229	1276.2849	1855.0249	1015.9047	2520.8555	1293.7349	1260.4395	2839.12	2932.154	6046.7056
"1552623_at"	166.51611	67.302986	156.12311	682.96356	618.598	587.8209	630.77985	158.401	178.16939	32.392445
"1552625_a_at"	1445.3528	1837.4995	1848.9386	1534.4219	1337.0763	1211.6442	1227.0972	1901.3011	1694.1549	1625.8887
"1552626_a_at"	2575.3457	15948.904	1028.7471	2477.4827	3369.4333	1290.6287	1744.8783	215.79362	443.99994	16478.889
"1552627_a_at"	2905.471	1949.4541	2758.6138	2525.6104	3680.7961	2902.0332	3288.3218	1274.1056	980.1812	1936.7355
"1552628_a_at"	8216.088	9768.039	7687.3447	8362.884	7398.229	8996.254	8726.049	5887.189	6033.8477	10743.762
"1552629_a_at"	26.411808	60.05217	177.10942	170.41757	79.253136	95.21987	107.67121	22.052795	124.99413	39.390846
"1552630_a_at"	1083.1312	247.73454	855.5252	318.95898	917.0029	836.9054	365.61343	1304.8231	1767.3638	755.3547
"1552631_a_at"	537.2819	604.1028	426.4299	497.09558	1133.9159	789.9209	417.10983	1344.4442	1424.0142	587.86786
"1552632_a_at"	1172.7028	1759.8735	954.95337	1462.1162	1287.3214	1112.0684	943.73694	212.19846	466.5719	2787.6648
"1552633_at"	112.98356	356.50473	1190.6902	182.39355	374.56744	338.59277	517.90753	536.80505	317.25787	462.21582
"1552634_a_at"	110.601654	347.5484	131.86801	461.542	500.96075	197.00807	341.3913	494.43283	705.8916	432.32214
"1552637_at"	342.39938	161.16713	856.2704	271.39404	419.36374	396.99207	371.9412	177.842	240.09909	35.47197
"1552639_at"	327.39145	200.14294	252.69157	767.5894	78.13818	374.22986	585.1768	179.53148	393.01324	549.1749
"1552641_s_at"	654.4447	1007.633	299.61914	1152.0852	362.8049	1150.3092	570.8634	4569.8237	4290.642	1612.6234
"1552643_at"	2227.2417	2164.2031	2743.4453	2283.6519	1764.8263	1598.3004	2944.599	950.1929	1095.7607	2011.2318
"1552644_a_at"	953.7875	780.3179	795.40796	1134.0082	937.61426	652.32947	729.1525	995.3698	915.057	495.51718
"1552646_at"	1854.5153	1022.0557	748.351	1570.8557	1639.5105	1607.4698	1190.9788	1510.7323	1829.2927	1251.1956
"1552648_a_at"	91.79631	133.76318	60.597473	291.38763	36.551277	53.665245	71.47448	1303.5726	1893.9092	42.750713
"1552649_a_at"	416.68677	184.32216	67.6295	725.0605	497.2391	626.63574	349.1035	587.8395	143.32529	41.870834
"1552651_a_at"	885.96643	809.6693	1732.4066	1338.1165	1729.4391	1543.471	1051.5719	1495.7336	1565.6777	781.065
"1552652_at"	1515.0463	2114.1577	1907.4963	1208.072	2460.1548	1183.6487	1704.85	799.67346	1346.9698	929.91766
"1552656_s_at"	5397.611	3199.1187	4193.1562	4375.0645	5903.7935	5777.4326	5298.766	11700.652	10109.424	2128.5188
"1552657_a_at"	856.6522	389.63318	974.8171	944.1762	1315.1693	1029.046	1650.487	807.6776	712.96814	452.96436
"1552658_a_at"	2276.118	1131.3889	716.78406	669.60925	1367.2109	1674.8136	1428.1111	1544.0402	3322.0017	553.80804
"1552660_a_at"	1285.2827	1252.5865	1322.9604	1462.8278	1498.6763	1545.2662	1914.1871	5634.618	6082.934	725.48785
"1552661_at"	59.610447	19.414656	2.3803542	84.988266	29.745018	14.442098	20.20768	2.2651224	13.086424	3.0712547
"1552662_a_at"	379.06387	78.89225	746.90076	243.63716	605.31976	1640.5343	464.53708	22.00632	138.54517	77.82981
"1552663_a_at"	3193.6255	4032.3628	2179.5598	3028.888	4757.2188	3233.3623	3355.0454	5067.567	5745.8623	1331.6167
"1552664_at"	2296.3044	2539.0889	3656.8855	1584.9357	3364.9346	1992.3823	2936.1497	2165.5037	2573.9265	1961.3013
"1552665_at"	870.07776	702.156	952.6628	532.6479	901.9615	1076.5696	818.59827	733.8156	1175.8909	627.7544
"1552666_a_at"	17.669508	57.52714	97.29051	26.423378	91.565765	298.33777	34.938988	30.807491	42.851803	317.23605
"1552667_a_at"	270.0494	961.6722	184.16052	1057.2538	530.35675	729.79	1265.8735	30.265879	48.505226	53.216816
"1552669_at"	571.2157	723.26764	454.45288	918.0144	1173.2565	762.3177	1214.9558	615.38855	1104.1453	588.601
"1552670_a_at"	727.2032	4170.62	723.13055	298.93555	203.63046	497.54947	756.6859	904.25073	591.97437	958.87384
"1552671_a_at"	719.9421	693.6541	1232.5863	926.7144	980.46735	1410.9922	573.20044	915.4873	900.79156	1064.7432
"1552672_a_at"	90.55402	224.4339	105.339195	112.546524	182.03975	77.84909	376.44	110.64833	75.716606	99.38198
"1552673_at"	43.02099	40.82089	73.93185	40.101147	419.85706	368.11652	312.63977	148.51767	26.793987	62.273857
"1552674_at"	69.3386	127.43013	75.93394	373.12662	124.993256	180.00327	98.68067	81.69141	59.662178	243.64665
"1552675_at"	275.78088	247.5197	141.22717	225.75395	451.2845	349.89212	256.68787	151.16776	292.9453	123.306564
"1552676_at"	428.55566	474.66556	330.29266	205.28072	593.71674	983.0015	368.89258	693.60626	338.50354	35.80381
"1552677_a_at"	883.0246	305.6895	465.5992	227.5778	832.05194	280.58502	171.94646	1272.2253	372.1517	651.2791
"1552678_a_at"	2209.5828	1026.474	2781.6836	1793.0227	3438.8	2716.02	2618.3406	1760.1652	1915.5548	550.4235
"1552680_a_at"	494.9805	369.55893	980.7606	410.06506	418.77008	132.13031	620.5001	5934.196	4399.6006	636.02856
"1552682_a_at"	598.72833	789.5746	648.70746	393.77216	573.5647	768.99274	1048.54	1580.3378	1206.3508	552.906
"1552684_a_at"	1007.5009	553.2092	1341.5037	1480.6177	1623.7012	917.25055	1008.6975	309.87473	681.3108	504.40656
"1552685_a_at"	685.29956	50.62159	357.4631	436.22934	665.127	628.6016	1045.6705	506.9584	440.74936	426.2589
"1552686_at"	436.4324	399.41626	242.18056	111.803	1131.0121	290.441	590.9998	34.664883	71.78871	383.03268
"1552687_a_at"	421.10962	182.71289	484.52365	599.16504	73.97769	118.8487	710.207	201.03493	404.79166	238.0138
"1552689_at"	2619.4917	1145.1998	3252.9524	3221.2957	5158.1074	4679.6387	2713.7417	81.67078	717.1324	437.96625
"1552690_a_at"	2554.1177	645.2553	3688.1428	949.0928	2474.6277	3445.2278	1357.681	643.03827	1233.8887	174.22649
"1552691_at"	1636.8894	204.41641	638.78296	12.584816	1267.7456	194.12813	657.09424	13.370391	259.3674	212.07307
"1552693_at"	342.92264	41.27292	39.975235	186.90965	19.83412	47.48626	34.749958	29.501266	14.809382	106.3739
"1552694_at"	989.7074	1964.021	1498.8383	1093.7535	1498.0812	804.5631	785.5157	34.169052	242.02034	2233.5444
"1552695_a_at"	6644.528	12084.232	8419.847	5598.573	5785.24	6167.304	6023.2705	523.63226	799.7608	13806.915
"1552696_at"	960.6862	579.5047	849.2444	1591.8867	907.6297	1253.7478	1138.8982	2521.0417	2365.0332	710.50977
"1552698_at"	3711.1519	5210.057	2499.1423	3991.3958	3363.6926	4482.3926	4254.3276	888.3644	828.5642	1643.9955
"1552701_a_at"	1063.3639	525.2824	199.85143	165.24808	1231.5077	88.85067	257.77353	1106.6997	1445.4895	95.03781
"1552703_s_at"	519.6441	786.5383	697.31354	690.0161	573.4502	641.3443	686.6859	2372.942	1969.2339	519.25415
"1552705_at"	628.09235	484.0931	955.10175	690.6027	689.06134	856.0455	601.21747	112.655	119.02449	365.65216
"1552708_a_at"	254.3996	178.7835	694.1249	556.1521	581.0476	981.12054	722.66064	283.3166	346.72867	42.405376
"1552711_a_at"	2247.9685	4584.6357	2733.3547	3010.3481	2133.9812	3511.1648	2500.2769	1973.7917	1086.9812	4580.2515
"1552712_a_at"	10696.86	2491.377	6584.1904	6660.253	7565.7036	9205.476	6854.786	557.3935	617.305	4111.825
"1552713_a_at"	646.2071	656.6907	1183.6592	486.88312	563.9341	562.13025	1156.1417	240.99811	311.64758	781.98584
"1552714_at"	783.1623	136.75392	70.098015	184.35359	814.555	361.06174	93.824974	35.320606	168.51488	232.62318
"1552715_a_at"	202.6831	138.66	658.88556	275.64435	439.81195	313.4344	665.92706	16.506338	207.51189	331.9829
"1552716_at"	2185.183	3437.1958	1430.642	2604.824	2569.5261	2237.52	1854.9083	1246.9355	587.7863	3051.4128
"1552717_s_at"	1913.1117	1926.5917	1462.591	1962.9642	2299.878	2450.2295	1642.1877	3431.6724	4058.8433	1377.234
"1552718_at"	941.8308	672.6599	750.11005	961.1302	647.8901	786.35583	1045.2981	431.86142	505.50546	1178.2238
"1552719_at"	153.96014	50.305557	196.241	45.377735	52.419476	226.77115	95.47217	215.40742	101.20095	1058.2288
"1552721_a_at"	36.981922	95.25583	66.325096	27.787968	541.1252	64.883316	495.23697	761.3711	707.7982	120.551025
"1552722_at"	114.93536	23.440985	53.133785	366.4398	36.01805	11.566363	10.588015	40.092163	107.24567	299.50223
"1552724_at"	844.1771	589.72534	1079.6255	1450.2888	938.02686	675.64136	1047.0757	309.8051	642.0754	890.1367
"1552725_s_at"	559.3289	452.28467	765.1249	475.70703	355.82867	885.1988	797.646	425.18558	478.88745	436.96152
"1552726_at"	244.797	106.73284	47.0379	112.094574	183.7057	149.68663	139.74974	115.53184	69.33403	1709.8744
"1552727_s_at"	193.0467	29.186893	56.016228	319.35812	308.69617	167.42491	565.7537	177.29774	167.53152	4388.098
"1552729_at"	918.2769	535.1165	552.4739	839.446	1067.863	609.585	636.90314	1116.7405	795.63464	979.93005
"1552730_at"	349.08478	65.65967	205.66443	661.2675	155.55777	126.783844	444.30167	361.5459	123.050804	97.63896
"1552731_at"	40.12778	16.588018	45.69076	22.598629	35.164207	31.787163	81.219734	31.095345	22.550262	24.717993
"1552732_at"	229.42094	505.63104	492.80695	564.602	483.79477	229.6221	832.58734	199.43771	281.6725	277.4382
"1552733_at"	3798.3643	2605.46	2721.3599	3794.3677	2794.4348	2791.5757	3674.281	487.48163	491.8334	6602.6587
"1552734_at"	601.7516	336.84647	694.19507	296.85992	674.2888	644.844	819.1434	501.22815	249.0966	301.14175
"1552735_at"	1547.1503	360.63123	1053.932	807.8539	621.35205	656.0524	599.28455	549.7412	472.833	5825.3623
"1552736_a_at"	165.02097	393.65253	385.5025	84.82011	497.73288	269.66998	67.57871	121.28299	387.1801	52.972576
"1552737_s_at"	1058.1854	1529.0513	394.13092	1136.2124	1302.7217	1632.2792	968.59515	1558.7255	1106.4081	395.89447
"1552738_a_at"	313.52972	754.6738	602.5525	395.9735	273.2037	384.12823	1106.2714	381.01318	744.7847	912.0492
"1552739_s_at"	1121.1615	1166.9237	970.63947	2212.536	1876.0574	1209.6116	2267.8713	1022.95306	1162.7137	1568.9441
"1552740_at"	579.7977	733.2468	592.731	482.9376	123.71842	569.95056	120.83331	87.28933	29.500708	622.88983
"1552742_at"	1263.5417	4409.1226	2856.2078	1441.1935	1047.7737	1816.9473	1921.4514	299.3117	413.42828	7583.7505
"1552743_at"	139.86284	234.83098	188.17676	115.57915	128.29659	134.26979	152.78296	182.25063	131.36856	79.925514
"1552745_at"	69.39003	216.85541	443.62753	594.8706	409.73782	398.81958	731.66003	217.04515	333.5894	200.72249
"1552747_a_at"	277.1883	296.8999	362.10538	378.97055	455.8375	394.84912	310.70026	118.86512	370.21185	235.40361
"1552749_a_at"	443.8039	279.05298	553.0561	373.61865	527.7834	140.47812	1355.867	142.16428	150.61856	303.885
"1552750_at"	36.305676	26.22125	140.30484	110.23533	107.48541	59.442783	332.92578	75.47214	98.6909	24.036049
"1552751_a_at"	948.67505	950.2034	770.1757	295.05515	1139.856	442.83905	217.2916	476.82864	514.9502	875.74725
"1552752_a_at"	4900.635	525.74207	4216.794	2576.987	5011.8086	3410.527	5129.8916	309.66116	584.00305	8829.868
"1552754_a_at"	7525.291	606.89777	7138.842	4017.0193	7263.107	9932.364	7967.2085	122.744	56.974712	27292.674
"1552755_at"	591.5462	45.275646	53.66724	60.895653	99.19796	90.19287	125.15286	35.96834	106.44615	12.803231
"1552757_s_at"	382.80374	24.605757	951.4097	44.475056	165.36842	141.81387	114.525116	22.455359	96.05919	35.7453
"1552758_at"	69.235466	223.70412	282.51965	347.72363	148.65234	100.56126	165.06737	62.912292	539.1874	259.44635
"1552760_at"	50.80549	13.178795	27.667397	47.64251	391.65414	31.942245	172.27945	228.47209	276.5244	291.97372
"1552761_at"	2277.5146	1119.2235	2399.1362	2996.3123	1211.9559	2732.5977	2770.0327	401.59464	1415.0796	1518.3107
"1552763_at"	23.116259	31.747015	351.8028	205.40828	202.42317	216.53848	135.52945	104.685036	239.74799	252.61182
"1552765_x_at"	131.59474	490.67123	816.75183	495.01434	1085.5653	691.22284	1172.1298	261.14963	427.96616	649.2535
"1552766_at"	86.58198	57.34365	453.74704	3530.6934	769.94135	95.78927	77.76771	26.229406	24.773329	88.93024
"1552767_a_at"	1181.2235	321.46094	1136.773	11809.506	2468.0515	998.8541	1077.7683	260.09253	280.99347	352.169
"1552768_at"	92.26103	191.95876	100.80523	73.13678	118.065865	70.767654	212.72517	396.36633	58.057983	59.412422
"1552769_at"	794.5863	453.20782	566.2631	672.91705	1048.1624	753.6177	843.99274	316.18936	378.51193	388.58237
"1552770_s_at"	807.561	379.07434	787.38745	296.9634	961.62286	146.84354	1013.39764	391.72116	350.9278	992.6263
"1552771_a_at"	40.20826	26.95344	87.113976	36.64644	33.12033	30.234028	51.104702	33.68204	39.671314	15.660844
"1552772_at"	104.561905	72.358284	438.18393	445.21622	181.94951	159.32178	190.35368	200.12933	57.557285	64.71305
"1552773_at"	106.13753	324.64368	960.79767	271.04514	877.0466	382.35754	628.1877	345.9334	668.3963	313.3928
"1552774_a_at"	2282.394	3141.5366	1065.5942	1177.4496	2039.2324	1565.5825	758.35815	82.10869	32.639477	2532.4966
"1552775_at"	488.8667	59.87812	382.04803	113.0943	172.75734	68.48769	108.66815	81.739105	259.4989	336.34854
"1552777_a_at"	37.692265	437.2387	623.63007	109.76971	139.83112	113.762436	236.91136	211.94464	86.447	483.0394
"1552779_a_at"	786.31775	20.04143	375.25287	571.9863	616.663	623.9766	282.47366	170.68317	146.88994	437.7175
"1552782_at"	1587.1296	430.5103	596.7592	1519.311	185.78125	171.29791	893.3666	230.60812	290.46762	1269.2214
"1552783_at"	257.50897	73.9285	375.37967	185.16196	166.45059	20.720066	200.08379	142.953	413.3422	209.64429
"1552785_at"	1432.5032	467.97522	1582.8591	1699.0552	1307.7458	1427.558	1457.5885	296.72208	623.85046	510.90784
"1552787_at"	378.93307	271.08286	952.0616	302.52853	121.79467	51.141502	337.48477	166.22093	113.394325	564.1985
"1552788_a_at"	621.2563	1046.3752	791.47064	511.0134	1045.1654	825.79083	774.7978	469.1197	391.01108	355.30106
"1552789_at"	725.2711	1579.3334	877.7979	1492.5919	777.21063	1217.873	504.3471	318.54187	374.407	2400.1543
"1552790_a_at"	3666.2366	7059.887	4034.954	7617.194	3167.39	5099.442	5472.187	2094.4773	2481.975	6654.2085
"1552791_a_at"	192.04182	76.922676	87.135315	213.72505	352.23413	322.0102	456.23212	269.55444	91.89338	123.70097
"1552792_at"	342.9776	512.3754	77.47282	387.6827	811.6612	202.57516	886.4677	815.4373	826.9744	21.52514
"1552793_at"	148.01187	699.21765	222.36293	1097.607	753.99414	286.1576	194.49336	550.5581	154.75505	1234.9342
"1552794_a_at"	375.9601	700.0837	34.27749	434.44138	782.9313	248.20708	491.98996	232.96637	25.913668	801.5424
"1552796_a_at"	318.53662	52.40945	125.79107	374.50522	368.8009	472.6088	509.19614	198.76648	91.67838	321.65836
"1552797_s_at"	496.2169	403.55508	388.4368	627.0357	508.1887	346.12378	968.08435	178.62167	509.6605	583.7833
"1552798_a_at"	191.01276	97.40628	181.70255	113.07324	255.69183	127.42119	201.38101	87.388855	84.01679	47.006737
"1552799_at"	273.75632	355.4671	188.05011	241.24448	326.72922	220.82846	175.81154	147.50891	174.36824	155.40375
"1552800_at"	336.2734	146.69415	167.45282	425.90857	424.92407	307.05896	205.55347	203.88371	213.93646	269.92172
"1552801_at"	289.16684	259.54135	159.83162	75.378876	178.18709	182.6795	168.07077	158.27026	37.08338	39.4976
"1552803_a_at"	108.08006	135.32677	342.28625	220.95796	233.46367	185.17545	859.85004	110.97281	98.595184	305.05353
"1552804_a_at"	1091.2415	397.1266	711.35974	572.4302	376.37222	736.6295	397.30066	516.2668	898.0177	611.2982
"1552806_a_at"	934.6278	451.77252	412.41995	410.6913	612.94464	362.82336	905.951	425.94443	376.58212	28.28499
"1552807_a_at"	2101.6545	1545.6014	1919.6942	1532.3226	1424.5824	1862.3298	1199.3219	419.75293	141.04688	165.56686
"1552808_at"	253.99405	266.7028	216.60214	27.17622	295.76773	58.380795	95.13178	34.738388	76.996666	231.2905
"1552809_at"	97.88166	14.526148	277.75162	189.64595	101.28839	136.01527	430.88382	59.074818	149.10371	189.12482
"1552811_at"	663.999	819.4957	712.67224	887.30774	1293.7281	205.92908	580.3405	559.3274	720.45105	178.23361
"1552812_a_at"	1090.3073	1608.828	933.5513	1266.1278	1574.493	852.60565	1163.7883	2953.0195	2678.841	1150.5497
"1552813_at"	193.86836	107.89302	232.01091	124.13545	264.74692	69.12136	259.4896	180.65335	102.391884	538.6969
"1552814_a_at"	422.36053	343.78006	442.24417	171.50645	154.09113	61.668278	497.80392	71.58231	141.38797	873.1879
"1552816_at"	425.47296	56.296947	171.79431	84.4021	342.45792	70.27393	32.40199	167.18387	179.67152	54.783485
"1552818_a_at"	32.97648	28.10557	530.7519	40.163536	172.50189	634.5182	83.60205	17.072548	79.013054	33.772823
"1552819_at"	526.2701	389.1387	192.41922	578.98456	515.6719	538.14746	352.53494	45.150997	387.53287	447.15472
"1552822_at"	327.45917	170.39395	540.1207	229.10832	255.67375	357.9619	490.576	308.53195	192.05075	472.89014
"1552825_at"	353.70685	449.55536	945.38403	496.54794	559.18317	868.45795	973.6714	277.98038	511.06985	501.63803
"1552826_at"	11.684059	16.162132	58.349556	109.459076	49.72214	169.71593	14.703228	6.55388	41.670372	90.02978
"1552827_s_at"	122.13953	404.71976	839.27844	303.97897	761.61536	413.12408	601.21606	273.2688	300.75223	403.9417
"1552828_at"	54.725906	714.46497	861.7793	599.00824	202.23145	104.713974	681.2113	554.53577	796.98956	332.59555
"1552829_at"	2690.3696	1036.9973	4070.4866	904.91125	2455.7256	1781.5881	1696.9503	1126.9963	777.8019	1432.3696
"1552830_at"	111.585526	535.0721	293.3012	492.16965	354.14288	400.37393	470.4495	288.81955	783.7006	439.54547
"1552833_at"	37.11368	101.12572	51.63399	105.77046	217.80533	210.7003	188.98619	25.778156	93.00039	32.52716
"1552834_at"	794.42316	243.52502	434.71246	47.354534	548.31824	1213.1489	512.6605	495.45755	266.10385	330.13458
"1552835_at"	447.35092	492.4104	650.514	821.37445	853.1415	482.35583	651.165	239.51422	195.64212	521.7251
"1552836_at"	727.10156	686.06976	1105.2228	802.59894	862.85925	921.9376	269.27893	666.4188	1509.5754	711.2089
"1552837_at"	7.1436152	14.437303	49.981815	96.2105	35.120174	27.569656	48.080605	78.737274	13.222587	19.745028
"1552839_at"	148.22687	177.27321	75.33951	85.60208	286.4063	260.01328	765.85236	349.5944	96.82604	256.5392
"1552841_s_at"	35.999798	257.26627	747.9702	40.37434	707.1648	437.09375	804.7306	104.87703	373.70676	328.64178
"1552842_at"	447.106	289.58136	130.37201	507.92145	635.0574	598.8711	390.05035	88.2274	376.57825	369.81335
"1552843_at"	69.49589	31.8858	151.69171	88.57927	107.830444	54.182503	90.816666	25.827272	44.208237	75.21629
"1552845_at"	189.97179	158.62111	206.0512	76.54647	212.52377	137.49261	101.88581	138.73256	85.186966	341.44342
"1552846_s_at"	585.8005	860.56744	604.70905	631.0119	427.636	520.4455	483.35138	1862.8301	1887.3098	447.57837
"1552848_a_at"	363.7481	771.34766	334.39755	593.5577	841.7496	401.54245	875.8012	311.32767	324.89905	564.1523
"1552849_at"	90.97004	61.971115	52.625656	83.89329	76.05666	350.54947	161.31963	133.72665	54.82506	44.013885
"1552851_at"	16.814949	34.1158	26.717436	102.07197	284.02878	65.72914	204.74751	16.433765	25.16189	162.9901
"1552852_a_at"	53.204254	125.93188	365.05746	125.57745	55.143272	72.97725	34.49611	237.5129	431.1384	218.13257
"1552853_at"	300.09958	71.25263	655.4529	178.84901	972.94214	107.09346	89.009705	104.9193	84.67556	452.12585
"1552854_a_at"	838.9722	69.30964	1073.8534	343.08804	1421.9722	251.52228	381.36047	125.01016	317.932	1658.2311
"1552856_at"	106.97853	189.76454	58.071552	66.77681	322.9358	109.41474	171.34908	47.836273	143.2453	257.17947
"1552857_a_at"	461.57568	480.10382	483.58258	394.13974	588.03815	675.7238	563.17224	32.47299	166.64896	68.05096
"1552858_at"	99.79964	50.626038	197.21992	135.99387	234.24449	130.29819	90.64348	163.461	68.14273	132.42796
"1552860_at"	167.64938	126.52881	93.82554	158.655	179.1033	147.49791	314.58856	326.47272	223.52571	246.66417
"1552862_at"	41.740116	71.57561	50.708427	32.107296	54.38322	130.94937	66.62695	365.71912	267.18024	185.53564
"1552863_a_at"	5041.149	2900.49	6102.9795	3970.2754	5353.963	4293.6777	8044.0327	1875.881	2378.9763	4694.6074
"1552865_a_at"	1284.16	1083.7845	984.1734	823.81213	786.1001	1218.3821	1215.0828	461.3164	373.87735	1079.3851
"1552867_at"	306.2576	352.60956	606.9286	412.05667	628.3046	860.8353	548.9286	371.00052	418.15878	680.1974
"1552868_at"	212.51631	271.3557	360.25388	412.33447	558.92615	132.47737	1229.9749	686.30347	800.53326	278.054
"1552870_s_at"	26.752954	123.260666	143.16039	254.88722	31.54905	206.37039	261.36	235.5816	159.17966	174.14473
"1552872_at"	433.8456	838.23315	568.95825	883.94855	506.83838	1072.8694	177.54562	346.3352	1177.7233	918.06445
"1552873_s_at"	129.95477	527.4571	691.81934	608.63983	609.188	741.74274	507.43707	464.9075	1006.48425	880.2752
"1552875_a_at"	51.141087	83.27128	106.370255	145.10118	34.825943	515.33844	90.34356	258.20514	34.82065	33.96009
"1552876_at"	332.5092	249.45758	276.68375	607.4853	63.17191	405.28473	470.38126	280.94702	337.03223	101.54322
"1552877_s_at"	384.02487	47.92487	276.04358	192.89168	170.42842	120.25421	142.25508	295.41705	149.59592	68.2911
"1552878_at"	161.30377	112.57672	47.46017	120.68328	231.23512	283.15402	79.2647	22.709267	34.975994	27.024632
"1552879_a_at"	109.08639	88.07472	129.0009	107.844826	339.16708	324.50644	108.62604	19.458073	393.12488	182.48001
"1552880_at"	30.520397	1085.1984	80.72552	86.22367	45.1395	28.862158	45.47641	272.79437	83.74205	44.940716
"1552882_a_at"	252.76375	201.62445	687.62335	314.00632	1023.7559	1067.5331	136.77971	422.13635	1173.2068	373.62997
"1552884_at"	392.02866	377.52393	562.00555	388.8456	685.1615	108.65601	215.92511	284.95486	287.93948	240.0922
"1552885_a_at"	1136.7992	1103.813	820.7843	1259.762	442.2109	1175.8069	506.3449	214.16275	378.0312	786.31146
"1552887_at"	1112.4006	620.8769	1796.204	1056.7029	983.4039	1097.1945	1212.3721	394.74634	426.01068	542.6864
"1552889_a_at"	3467.8513	3078.4365	4485.373	2848.0046	5587.8	3066.7046	2991.3271	1290.5249	2039.847	2613.2603
"1552890_a_at"	337.4436	579.071	77.791534	249.72812	820.32794	235.81131	400.7248	300.5874	375.44073	98.407
"1552892_at"	235.54765	96.194496	702.8783	260.9205	1864.9767	343.54718	502.65036	215.00383	175.61943	238.1537
"1552893_at"	3971.647	2611.123	3923.0566	7232.1846	8155.7866	5081.6245	4338.2515	598.58685	946.97656	1356.3312
"1552895_a_at"	308.034	36.18695	261.08597	180.6727	321.17987	314.92786	113.66679	87.73716	43.91219	67.05529
"1552897_a_at"	471.36652	294.0603	750.9609	97.57827	467.33173	615.4385	687.3013	54.487667	68.374275	300.20627
"1552898_a_at"	29.676937	102.35346	90.599365	27.298979	277.95715	133.26665	128.3611	45.71448	50.697533	66.66986
"1552899_at"	702.1812	694.854	890.5711	1065.3785	1395.0134	994.49493	1229.9106	404.849	633.95825	428.55435
"1552900_a_at"	421.22028	571.36633	387.19766	494.33026	816.29254	723.9679	509.53906	94.17685	214.77562	623.6947
"1552902_a_at"	66.86845	44.78087	100.32607	67.3876	59.853935	113.64024	266.57883	47.51374	55.90212	32.882725
"1552903_at"	839.5459	448.3066	928.42084	216.64677	1372.3074	479.24625	458.58252	328.54782	862.38965	614.7882
"1552904_at"	217.17242	3.5222788	216.82156	6.06152	109.22159	21.738716	100.930504	153.21796	255.03685	1.9835606
"1552906_at"	40.947968	166.16208	37.622234	28.90624	38.897415	77.08589	83.85256	28.69265	158.96822	13.128812
"1552908_at"	25.172775	596.4811	158.389	281.57074	144.90631	171.2134	20.64837	88.814415	211.63895	217.15234
"1552910_at"	392.49982	62.819004	74.6587	298.9234	72.40371	250.20688	106.83191	153.04054	201.24234	458.27304
"1552911_at"	203.15134	48.44786	126.094505	124.359665	67.340965	91.88014	67.18599	55.09003	219.467	34.2617
"1552912_a_at"	221.49472	47.200676	616.0555	45.314022	591.7884	361.91406	63.964775	21.743309	42.437923	21.004705
"1552913_at"	17.061249	75.89374	141.20453	158.90791	128.27492	17.807787	22.918367	107.02247	162.38419	140.61464
"1552914_a_at"	747.68744	211.51938	221.40457	200.1088	236.08308	327.58817	565.74194	1710.1508	1855.5994	116.52054
"1552915_at"	772.4491	218.77559	835.1982	290.43878	643.36127	185.707	721.82733	413.67123	558.66473	395.34424
"1552917_at"	1147.8514	575.9673	1302.8392	1196.4438	1587.9908	802.85315	1105.1877	511.66473	722.50397	714.51483
"1552919_at"	28.847996	80.19872	126.01287	316.6146	278.97003	265.10577	459.2481	57.887306	18.987522	395.05594
"1552921_a_at"	910.66724	1511.1776	1165.5698	1041.7413	1583.9583	1321.1449	631.9597	4547.6924	4337.592	841.97015
"1552922_at"	121.75941	111.650444	545.5915	23.382328	180.72945	91.96867	89.113716	60.548553	162.19942	868.8405
"1552923_a_at"	1001.9029	845.8675	2010.3727	1172.5469	1668.3572	1393.7816	1732.4651	489.81348	248.53838	1030.0477
"1552924_a_at"	2075.5784	1199.7003	1885.4943	587.1888	1838.8141	2096.6572	1183.4113	860.51575	1431.4943	1513.265
"1552925_at"	1164.2822	155.69951	827.9655	109.03371	122.33927	590.3864	133.79305	38.430836	330.5219	84.63834
"1552927_at"	617.9661	669.81903	566.8346	584.9124	1263.7733	652.3172	823.05786	977.2568	700.4676	403.51608
"1552928_s_at"	436.05563	501.5009	323.2888	453.75958	615.4981	381.09625	667.9844	923.6207	794.81506	330.56958
"1552929_at"	119.92946	82.59161	26.117914	56.632183	354.0793	21.284468	232.14442	78.94207	39.19805	303.94016
"1552930_at"	229.32162	685.69104	1245.236	789.79626	850.62683	351.45032	807.14294	714.20886	718.248	530.05255
"1552931_a_at"	1375.2903	1344.6387	1454.2042	1332.5782	1143.8069	1211.8746	1579.149	4897.73	6861.3135	2479.4126
"1552932_at"	120.06545	334.114	124.48222	41.021362	101.72773	157.86166	238.52394	49.296875	60.435093	36.80361
"1552933_at"	79.932945	388.1922	1000.08466	606.55255	817.7424	539.73444	1589.6959	150.15259	471.09274	642.02075
"1552935_at"	1207.4979	890.0672	1168.3268	762.6957	1385.6864	1409.7488	689.75146	1504.7444	1921.4437	663.1036
"1552937_s_at"	659.9668	683.0759	1336.0182	1087.2179	1213.9166	648.3977	1387.5703	2947.02	2948.7458	1308.9105
"1552938_at"	296.7927	129.51964	379.90338	50.965797	156.51894	157.72278	489.33746	28.344	327.58264	183.15146
"1552939_at"	6.4813175	28.143904	431.26212	103.69088	201.0444	147.96748	234.03616	168.60349	316.78354	14.434586
"1552940_at"	415.94165	65.55262	619.172	423.26147	114.35272	65.46068	779.6715	22.584572	307.37595	53.75216
"1552942_at"	2057.834	1553.3396	2379.0496	1953.6682	3353.654	2162.6814	3026.1895	970.0448	1286.8986	1706.2625
"1552943_at"	191.23573	185.523	534.73047	809.06006	1164.3132	999.52716	266.78903	200.01222	175.52716	132.1414
"1552944_a_at"	841.3573	1061.5201	620.8837	389.4124	1574.2379	560.6429	825.54504	151.81534	320.95352	711.5946
"1552946_at"	161.97112	270.14532	444.53207	222.82681	84.31696	81.87094	305.92062	558.6209	229.54959	92.34256
"1552947_x_at"	87.90909	579.00116	422.74042	125.5244	938.5339	154.80704	820.68475	534.07336	767.1081	28.40024
"1552948_at"	116.29366	45.33687	61.825523	915.98254	144.06401	222.66145	147.4099	45.759075	424.12427	61.358112
"1552950_at"	346.6711	390.9293	397.00085	673.6777	520.6769	86.88137	70.90419	87.8291	428.78848	297.268
"1552952_at"	149.98979	242.00044	676.86554	115.45672	613.65735	362.74472	153.7805	332.06348	108.832466	238.52315
"1552953_a_at"	867.26746	374.5125	549.0238	699.1493	670.62067	210.58156	218.40443	484.5718	41.094448	384.75525
"1552954_at"	285.187	346.36826	613.4397	227.49147	532.1162	72.36195	192.88031	302.82632	316.42215	398.70486
"1552955_at"	808.74963	541.4931	1619.4979	291.22067	304.16965	291.93576	408.8666	339.9799	440.25568	399.51837
"1552957_at"	579.24414	423.43155	539.62006	431.21445	513.1786	594.15155	293.4052	239.16046	41.661118	240.65979
"1552960_at"	538.03674	79.82315	206.79126	792.0394	110.61385	371.75842	476.41357	72.86822	349.74042	244.01004
"1552961_at"	284.69724	99.885445	170.21204	256.9917	410.3549	523.6396	349.14883	250.10535	303.44675	200.66428
"1552964_at"	84.55417	77.2959	154.91283	106.77934	191.41405	83.47142	106.2851	57.003555	133.64122	98.107796
"1552965_a_at"	32.61931	252.48724	194.99916	300.45346	369.38953	110.23009	168.09341	227.5092	132.12282	33.278793
"1552967_at"	508.89023	469.2017	896.72003	430.0684	1173.5295	771.0269	1059.8944	267.45288	537.997	292.61276
"1552969_a_at"	700.8556	56.416927	850.6892	448.75034	720.7102	567.96136	662.52264	70.43812	183.10919	54.09224
"1552970_s_at"	879.1456	645.6186	508.8803	664.99194	533.9529	366.53683	841.3374	373.03784	245.72975	463.91406
"1552971_at"	505.20795	191.4071	517.7439	683.48065	1136.4147	516.5741	160.29494	171.80444	270.25735	161.19672
"1552972_at"	58.965862	5.2669287	97.73078	4.2271047	4.4183416	116.95377	135.76848	5.891697	136.04564	7.4384522
"1552973_at"	93.797226	43.561127	487.89304	119.10195	338.99243	132.7702	87.64828	133.74754	121.57727	68.71088
"1552974_at"	69.97216	19.577085	82.48104	64.782555	259.4404	53.127533	385.25046	311.7341	43.95601	23.137997
"1552975_x_at"	78.38054	168.16603	42.936344	41.821205	20.357979	266.99356	115.550735	36.211075	157.01321	26.710527
"1552976_at"	1834.5736	1582.4564	2397.8433	1594.547	2199.4944	2328.4978	1956.8771	846.1402	973.36707	1672.5182
"1552977_a_at"	5251.0234	6612.7153	3814.6406	4756.1816	4179.8066	4801.0615	4699.132	6637.203	6376.372	2283.7144
"1552978_a_at"	15070.702	14179.411	11958.275	15526.92	13575.122	13886.673	18959.924	9439.667	7405.514	20825.584
"1552979_at"	58.48001	486.3229	356.75717	505.8952	53.645947	210.66258	97.5726	76.75575	66.7391	38.02678
"1552980_at"	714.1204	1003.5874	1093.185	561.1571	262.18622	1027.2029	1015.17505	675.2885	1027.212	534.8994
"1552982_a_at"	327.06516	58.583942	142.04056	133.528	112.84898	37.843475	107.11994	73.58781	105.346825	98.27544
"1552985_at"	850.7004	451.32553	878.6254	670.6011	233.77757	828.0403	777.67487	162.13686	96.220276	464.9757
"1552986_at"	78.39928	84.1517	52.154995	72.02667	79.22397	45.280743	60.358	69.23401	82.13458	81.12403
"1552987_a_at"	25.601068	5.9874525	18.290901	131.01176	29.43967	91.814926	66.584755	68.51232	104.63752	15.943005
"1552988_at"	251.77724	286.6352	43.961033	267.37775	61.426533	177.52884	209.14673	119.09756	13.175394	346.8367
"1552990_at"	18.583704	18.361088	26.37871	20.83685	54.126316	30.907713	50.196102	48.184578	18.841663	10.526049
"1552991_at"	600.3229	118.19188	977.9248	62.49756	267.4946	1123.5536	546.6388	319.55545	750.3736	539.65656
"1552993_at"	14.1938715	18.400778	36.23233	18.244982	60.633366	69.823524	21.73166	18.58452	25.684267	22.742094
"1552995_at"	181.06248	135.35612	373.42896	424.1377	902.85956	326.9852	205.12051	85.6731	73.509094	55.587257
"1552997_a_at"	175.22304	507.9157	222.27351	367.9751	220.7127	473.11646	209.84265	93.19954	500.72638	761.5674
"1552998_at"	93.4506	169.22295	159.99731	116.3259	93.09957	126.75288	121.85439	23.394382	44.16866	55.07463
"1552999_a_at"	87.1085	40.789185	102.30153	97.66888	114.19781	40.242405	56.167362	38.034893	52.853832	35.06577
"1553002_at"	769.1459	503.55197	610.22577	580.6499	611.0475	542.7537	814.9883	198.16945	652.79144	248.41881
"1553003_at"	526.0487	483.47495	111.891205	231.11449	74.6541	725.73737	872.3818	247.07062	182.9793	616.43976
"1553004_at"	79.17813	52.856564	71.329025	157.44888	467.58865	271.06067	303.66504	194.8564	306.34772	372.30447
"1553006_at"	351.8585	71.99033	365.02176	88.18572	117.87844	104.62063	289.1336	311.7068	203.16399	87.253685
"1553007_a_at"	54.974525	38.566566	293.92413	34.610203	406.22324	87.05999	298.6103	173.74666	270.86304	23.841599
"1553009_s_at"	26.720493	26.733345	35.51664	29.483128	35.336174	43.558266	47.818256	24.332226	32.20249	29.079731
"1553011_at"	158.4378	260.08786	562.89905	423.87604	801.5484	337.97534	226.98088	99.18446	684.9421	777.7123
"1553013_at"	331.04852	923.777	788.4807	900.77386	990.45593	814.6594	1200.6709	419.8792	1019.4736	916.3553
"1553015_a_at"	1901.4607	1262.8994	1308.2628	1655.504	3205.364	1495.3794	2014.8896	4662.2007	8160.5425	1068.7965
"1553016_at"	773.6848	546.67426	893.91705	1123.2137	1171.1163	625.2593	884.9975	328.6392	886.163	790.28424
"1553019_at"	355.31595	518.28503	521.42584	427.07318	554.3147	641.87	644.48114	403.3987	228.04243	692.49347
"1553020_at"	418.54962	354.4778	392.8522	130.67877	634.532	319.86545	346.99933	272.48666	517.9468	590.13306
"1553021_s_at"	457.5734	498.53043	67.01197	116.55573	714.52234	263.25043	407.241	3015.8403	3608.1426	292.41284
"1553022_at"	23.746986	151.89919	17.638988	30.078518	66.12575	208.21265	228.2397	8.791268	44.091846	32.55792
"1553023_a_at"	339.34415	63.82823	378.58783	273.43802	555.48114	388.46982	275.383	69.93425	779.96606	371.2974
"1553024_at"	146.57176	219.49498	437.15817	209.19214	219.2783	606.45374	494.09573	108.95452	149.9712	311.8894
"1553025_at"	112.88106	276.07376	550.48	387.0176	269.949	425.52756	319.8059	56.710133	122.72894	304.58856
"1553027_a_at"	128.72665	200.18503	217.15038	57.25201	150.65376	68.0322	692.82	114.817665	152.14423	37.419697
"1553028_at"	95.97848	101.72829	613.74426	725.75726	395.4602	432.78726	287.49106	215.65192	247.10953	277.47025
"1553030_a_at"	2133.1404	2856.5981	2286.268	2759.118	2723.4216	3113.5322	2144.626	2206.8706	1603.5923	2073.8618
"1553031_at"	375.71814	247.73418	747.8286	398.80978	55.20953	557.84717	58.779167	205.53462	265.6069	564.9642
"1553032_at"	131.56981	41.04176	730.14636	173.24747	222.57703	122.77165	190.60866	32.983337	103.626465	69.28619
"1553033_at"	219.04822	39.749428	286.47076	299.25436	1091.5481	73.66929	559.0238	235.91425	241.94914	71.835495
"1553034_at"	1707.7711	1527.7101	881.52545	1858.2279	1286.9845	932.7889	1580.0507	1061.9287	643.785	991.2637
"1553036_at"	199.13496	206.48238	257.51764	83.97713	65.98707	83.976425	98.50447	101.85099	62.587883	176.11493
"1553037_a_at"	919.0163	521.5414	2687.8252	1208.7318	6377.8896	4841.8906	1917.7346	356.34714	214.1517	246.55925
"1553039_a_at"	155.20403	192.8949	153.01439	174.34456	180.54913	296.53665	320.22137	85.79064	173.6678	242.47873
"1553041_at"	467.60312	372.69766	667.05444	225.13176	196.04317	536.0389	207.17122	141.80124	120.040825	99.63667
"1553042_a_at"	446.6971	419.0706	137.1611	866.6709	849.1468	523.6571	378.96033	467.8099	545.3438	702.87195
"1553043_a_at"	491.57886	421.85138	710.27875	466.23935	242.11598	826.8659	1057.0543	62.76164	133.73216	108.81342
"1553044_at"	94.45925	367.16458	147.10619	101.99633	113.36516	140.32927	261.66782	32.149708	71.699776	317.11258
"1553045_at"	182.90276	89.76381	60.402122	284.27573	143.49168	169.42303	214.12103	298.27902	59.104885	30.235184
"1553046_s_at"	83.58104	233.80872	114.53065	219.5589	283.56778	272.20816	389.6429	604.7647	214.75465	91.27437
"1553047_at"	915.78217	1029.7732	1606.3677	1759.3265	1025.0093	1452.6171	1734.3545	554.63416	853.9243	1247.6022
"1553048_a_at"	1749.121	1858.6835	1142.4126	1875.3262	2715.0425	1889.7537	2262.2446	2267.7075	2434.748	1118.5509
"1553051_s_at"	448.11496	319.2879	238.8919	159.86348	177.39717	175.63678	210.85136	332.5852	143.10806	101.89725
"1553052_at"	87.675896	61.55345	122.078674	45.478226	84.15037	319.38297	419.21655	173.57425	64.26203	13.153177
"1553053_at"	82.022125	103.90048	185.9316	126.02217	193.57603	47.043846	186.60005	95.0132	64.5437	43.29226
"1553055_a_at"	388.9315	77.913864	112.34431	110.17881	88.157135	285.172	91.16032	813.0531	1714.8325	62.78554
"1553057_at"	392.69498	404.7964	1091.7717	274.38303	523.1113	742.048	1345.0244	317.79974	401.1549	255.47937
"1553058_at"	610.5193	282.34146	216.08359	145.72699	169.52753	97.27555	210.44418	138.51164	93.52158	22.91522
"1553059_at"	77.00141	28.339493	359.01196	74.56141	175.19872	235.36452	122.250725	32.119682	133.00038	90.19206
"1553060_at"	281.8182	210.86208	185.75308	164.99467	83.38849	414.78235	230.3786	196.14975	240.88802	378.4481
"1553061_at"	67.19413	43.363953	142.03319	46.211258	165.99237	66.087456	173.59631	127.92383	62.253323	42.77704
"1553062_at"	281.46408	738.12866	189.0681	114.37884	182.16016	170.01997	167.89041	428.48453	83.42157	101.80766
"1553063_at"	490.24655	463.10574	610.29596	607.48505	65.2892	599.8483	827.24146	368.5417	352.85773	50.54314
"1553064_at"	251.64029	140.9334	172.08313	479.99728	280.0814	236.68413	624.26337	143.48235	87.62921	143.1019
"1553066_at"	276.9575	220.7589	771.90326	465.66245	373.32715	393.4531	40.206413	69.94788	97.90996	330.7906
"1553067_a_at"	735.0155	649.19934	652.84607	1208.4802	1327.3743	484.22043	856.3038	381.8642	332.50198	793.3788
"1553069_at"	89.621704	94.59004	317.51535	411.17947	161.10806	50.638237	380.61273	441.0556	307.47958	252.2131
"1553070_a_at"	54.594418	165.16064	129.47995	106.37532	126.51435	337.67947	143.11899	62.996407	104.23473	36.081863
"1553071_a_at"	282.16525	87.92873	75.60213	231.68521	128.58997	285.6507	48.9602	55.70309	64.18503	94.941124
"1553072_at"	507.9166	269.22794	315.14682	353.12314	216.71156	62.825146	132.39746	413.96478	482.45804	122.92237
"1553074_at"	31.941095	90.03406	22.058313	19.99899	39.311417	24.596153	37.281292	27.53144	21.563976	19.249626
"1553075_a_at"	126.01615	111.26316	129.9302	23.846891	154.9287	15.59447	209.40813	42.956173	102.16991	46.082832
"1553076_at"	42.935383	24.59728	51.72909	46.833607	102.60245	154.70293	79.46088	194.98648	166.34709	100.93147
"1553077_at"	52.098022	245.61082	49.015106	39.572693	80.8072	59.491848	69.68703	41.453346	58.365955	28.5837
"1553078_at"	794.8295	26.623238	383.6396	134.06898	400.61407	376.73175	161.39369	97.06277	445.36038	31.70743
"1553079_at"	76.76422	110.6832	228.59229	170.65062	394.6393	55.684994	145.0942	25.015818	382.7065	22.764648
"1553080_at"	106.13367	349.5642	45.63605	241.9053	318.31982	347.0013	407.0663	178.10379	386.08063	196.35648
"1553081_at"	203.68192	143.81903	502.5488	830.91693	208.5769	188.71667	353.79083	496.68466	248.7761	74.04702
"1553082_at"	121.55243	112.78964	49.12448	35.144245	52.9073	35.05798	53.9977	22.05063	359.2162	31.762587
"1553083_at"	926.9843	158.47038	629.763	196.67503	1213.4967	194.651	311.55035	83.08058	411.22516	216.83887
"1553084_at"	353.1732	44.056328	162.51862	496.55927	65.659096	421.84647	541.48553	117.75269	287.73834	412.8644
"1553086_at"	246.01907	25.832235	150.94229	37.78962	128.59125	62.79239	145.52483	25.914003	40.320393	27.294168
"1553087_at"	190.86613	81.96776	1269.5166	958.7354	426.12534	186.05092	1343.3184	162.73119	520.54987	523.83844
"1553088_a_at"	3012.5103	2442.1445	4427.291	2475.2476	2379.3516	2772.4543	2611.5095	1549.8904	2764.852	2136.602
"1553089_a_at"	64.83966	21.610193	72.93566	70.52708	98.320175	112.82768	75.71523	60.51842	58.612976	49.569935
"1553093_a_at"	101.588356	27.852922	76.8733	35.27176	24.443935	58.444218	56.558323	50.971184	98.520195	1345.8531
"1553094_at"	1779.0035	620.1076	2282.2024	452.99133	172.98831	1776.3228	203.34361	113.94257	170.89775	66.901215
"1553096_s_at"	898.1428	1377.2631	826.07477	1218.9059	1301.0543	1093.836	269.6541	1234.0055	1498.9824	955.1319
"1553099_at"	1928.6486	4096.8677	1905.2273	2067.6667	2504.8137	2030.7771	1493.6279	1275.3303	1204.085	1441.3168
"1553101_a_at"	18361.678	18278.043	16477.164	16611.44	20708.223	17714.98	16988.7	17366.09	19261.973	12674.671
"1553102_a_at"	3451.7458	285.54608	4606.378	9734.958	5743.064	9113.891	3395.9573	871.9423	765.84393	60.15943
"1553103_at"	2766.947	7913.7886	3567.8342	3382.13	2852.6165	2722.571	3275.7905	3387.0776	3239.787	8669.619
"1553105_s_at"	345.80685	653.0341	734.2883	163.69916	764.7833	857.6878	1512.0438	5106.1016	3247.118	3391.265
"1553106_at"	1023.35345	818.0555	443.8845	634.7669	959.3086	497.91367	678.75476	1954.405	1438.231	410.44745
"1553107_s_at"	1392.1239	1486.7065	2202.101	1208.7487	1107.0515	1013.1214	2190.7551	2090.3318	2169.8447	1097.4373
"1553108_at"	891.69977	657.4506	713.8292	1017.7649	1111.7957	1282.8815	984.5626	1659.7731	1239.972	737.27435
"1553111_a_at"	2891.6016	3589.166	3225.5789	3669.8313	1117.9635	2911.4927	3128.4846	1650.1558	1156.6161	11348.792
"1553112_s_at"	5945.4556	2367.5684	2418.863	4071.0354	3052.0962	3840.2769	3202.2527	3198.42	3789.583	2453.0837
"1553113_s_at"	4154.186	1821.1398	2052.8452	3504.7007	856.4935	1697.4944	1414.7213	2025.382	1784.3188	3126.2886
"1553114_a_at"	204.37968	148.829	770.6707	167.6789	508.87463	570.5273	883.1861	98.41085	262.55658	132.61642
"1553115_at"	100.515366	65.25114	125.677704	118.95649	85.68649	104.153366	98.860825	156.70966	118.28882	77.24726
"1553117_a_at"	646.6479	1371.1459	842.92694	815.612	1052.485	1081.8438	838.51685	6716.8086	5953.99	749.3606
"1553118_at"	2985.772	2894.0166	1848.498	3316.2246	4984.346	3929.0273	2221.185	1725.752	1583.5377	5002.6772
"1553120_at"	293.88977	33.639572	161.13266	49.332314	356.71106	224.9937	634.7638	1230.5209	1255.1178	12.018731
"1553122_s_at"	392.62814	443.59897	436.8222	585.8684	332.63507	405.42636	308.7234	761.3044	296.79645	478.33038
"1553123_at"	987.0929	576.1368	698.91693	973.008	1325.0187	386.5003	997.49585	1320.3668	1395.494	583.0916
"1553125_x_at"	822.02844	607.4748	652.75024	1038.5747	1152.8921	734.5743	861.76794	891.481	450.5457	399.17953
"1553126_a_at"	53.91657	241.26353	26.464159	95.466095	433.84897	50.75729	221.12755	197.00346	69.16179	116.89977
"1553127_a_at"	681.93726	590.17126	283.7487	548.5968	644.3159	421.5465	653.75385	384.62393	490.21793	406.71756
"1553129_at"	255.11607	318.55466	270.2105	143.49203	544.2152	219.15259	287.6329	7.374387	22.212524	206.09673
"1553130_at"	1079.7452	1136.3704	826.40735	1028.202	1367.0925	2095.7842	1180.921	1057.4302	699.95355	289.72412
"1553131_a_at"	63.802086	343.4256	198.24861	68.20551	75.52497	122.17236	166.17653	155.27467	194.06879	140.90974
"1553132_a_at"	627.06866	184.25255	18.050177	369.4747	255.78151	186.13252	216.45763	9.915548	177.11699	27.62903
"1553133_at"	870.0786	1077.9711	1427.97	1129.21	661.49493	764.8695	1139.9786	94.091034	102.70824	1010.45496
"1553134_s_at"	438.48148	51.140095	248.46008	249.20659	43.825703	206.75076	39.560883	23.34273	247.69427	566.156
"1553136_at"	134.73433	166.53986	99.01749	208.66348	114.875656	597.3886	343.509	609.0264	313.34506	261.77145
"1553137_s_at"	686.3899	615.94543	188.81416	611.91	216.49942	624.6258	381.88556	428.49316	876.4977	359.65527
"1553138_a_at"	58.871098	90.14898	43.27467	35.663662	97.641304	268.2844	35.79909	358.0686	679.6258	105.04767
"1553139_s_at"	5767.766	2566.4526	3608.3835	3709.6472	5614.967	4227.847	3083.4485	2004.3118	2261.5725	1715.6912
"1553140_at"	69.62629	232.90584	316.52518	263.42123	566.18866	357.22784	277.33606	314.05167	111.06759	287.5351
"1553141_at"	1011.12244	1002.0137	1172.466	1760.441	1377.2625	1587.0557	918.9471	598.005	992.2229	836.83307
"1553142_at"	825.4399	413.94833	289.3144	239.60023	375.2007	367.7924	622.46594	401.8731	346.44995	602.7335
"1553145_at"	2493.403	3744.57	2073.8977	1841.1377	3079.8113	1616.7773	1817.5605	683.8666	668.739	4302.823
"1553146_at"	40.85842	44.855427	94.1931	32.463856	132.75195	65.231	89.80108	220.29587	23.673447	50.74079
"1553147_at"	131.70937	178.435	129.25435	48.73519	106.33079	311.24408	45.41786	27.764956	64.065956	51.89818
"1553148_a_at"	4525.9814	3986.7107	3063.6216	4380.0547	3558.5286	4162.126	4198.866	1994.9221	2126.9536	2989.0894
"1553150_at"	838.82166	1004.5362	736.2627	505.73587	674.7815	742.76135	732.65	626.92957	331.62747	338.8248
"1553151_at"	383.45123	149.62767	235.8112	58.8428	308.87885	271.24802	50.397236	80.118454	66.10641	50.144005
"1553153_at"	1354.1184	759.95905	1664.7471	993.61035	2415.8608	2108.069	2798.6936	1666.7375	2131.4302	1370.0533
"1553155_x_at"	1162.5868	676.837	1166.3295	946.85565	1553.9192	1404.0492	1167.7343	742.4946	1962.0277	849.1604
"1553156_at"	117.487885	33.99036	37.782238	33.406254	48.736343	140.57889	69.617744	23.76083	204.00084	24.62371
"1553157_at"	218.93779	82.65052	454.2485	235.56967	483.54907	567.37427	108.53696	331.80774	329.02234	51.118935
"1553158_at"	757.3806	2764.2683	906.09674	1183.2848	340.7254	1007.20135	991.21173	1274.8878	1012.811	1153.9376
"1553159_at"	380.09113	128.16974	173.56442	108.021866	416.18253	513.50146	444.41104	80.63179	440.589	88.44841
"1553162_x_at"	2284.77	1867.1448	3476.53	4295.5483	4823.3228	2807.8516	3254.667	1917.865	2747.501	2263.667
"1553163_at"	1348.3239	821.3035	787.75604	875.7548	1638.0209	695.3132	1238.0195	55.714752	460.86932	898.381
"1553165_at"	374.8701	397.54355	692.08575	45.8758	519.22784	563.784	286.801	498.37808	661.54016	825.72986
"1553166_at"	1204.7966	106.83562	1164.9879	440.14212	1005.70654	894.43256	910.07007	1393.8213	1588.3881	970.047
"1553167_a_at"	377.44452	521.18054	750.6107	417.83612	594.58295	692.7044	512.1968	1215.2745	1213.3899	824.33295
"1553168_at"	142.21426	138.09637	689.1433	126.86901	168.58987	215.81099	133.86652	443.53244	281.9551	273.55582
"1553169_at"	50.064766	34.392235	82.95572	51.47892	62.221443	71.65584	88.90957	50.01763	111.638275	33.451492
"1553171_x_at"	71.63677	70.26803	117.31649	35.271706	103.835754	62.28004	84.9169	43.780796	75.67322	59.04427
"1553172_at"	1681.2524	781.09717	2290.328	2203.681	1831.9435	2209.6223	1589.2972	2113.6277	1796.5004	985.54376
"1553174_at"	89.02317	149.52448	172.48805	50.353012	175.80844	386.4264	143.413	89.15232	173.28093	63.234257
"1553175_s_at"	928.63446	29.810705	111.624016	254.60149	298.61652	2638.7693	1106.6868	464.48663	415.0853	206.60097
"1553176_at"	659.3298	259.7039	105.09521	277.14136	465.64804	558.18085	477.6276	154.36357	294.53574	290.41748
"1553177_at"	288.23117	290.62888	848.5163	275.491	567.8844	347.8719	429.15656	200.68124	541.4722	272.49664
"1553178_a_at"	587.2936	704.70026	1193.6345	1252.4208	2293.3225	1533.7837	607.2675	825.5367	766.14954	529.3731
"1553179_at"	133.28568	78.27188	760.7576	71.23662	86.87767	1121.1172	89.719635	55.972385	36.091034	56.968166
"1553180_at"	211.36313	151.67598	297.76	167.53519	210.42038	428.2309	204.57903	128.4515	196.5096	70.70394
"1553181_at"	744.42975	666.23157	1901.8248	1279.3246	1250.5137	1217.9072	1607.9741	422.8604	799.2133	1009.72784
"1553183_at"	68.53692	41.465374	41.19741	480.70807	75.28544	40.93772	71.05689	36.735054	398.54535	19.055643
"1553185_at"	2011.1835	1590.5538	3405.3005	1242.8766	2514.056	2543.543	1438.5989	1630.3007	1366.7831	4344.1724
"1553186_x_at"	1928.4452	1732.3954	2635.3726	1506.0769	3635.205	1859.342	1696.7411	1619.2858	1193.6393	5291.822
"1553188_s_at"	60.46631	35.72919	82.46928	88.44683	125.11434	40.99688	54.725754	52.501934	99.83629	22.742893
"1553190_s_at"	458.77377	194.25613	1049.4026	948.8142	1364.9078	887.0533	1057.5094	368.05658	844.83167	467.25177
"1553191_at"	95.95321	153.44215	355.4694	33.994045	249.27937	13.114787	225.20209	317.46817	466.5969	165.11105
"1553192_at"	359.30777	77.96344	345.28564	714.47943	512.2801	309.03885	437.87848	310.81863	276.27417	1015.9352
"1553193_at"	435.6289	191.74918	656.364	629.2083	478.3278	436.03503	501.14874	228.84543	375.88934	1733.4515
"1553194_at"	1925.2234	310.0989	1389.761	1150.3219	2647.7434	1499.4011	2025.7124	209.15614	21.9322	711.1462
"1553196_a_at"	81.439384	61.585308	66.08655	79.73918	113.138275	74.97676	146.69853	33.795494	15.355431	64.64363
"1553197_at"	321.5611	196.53662	298.36017	82.92219	410.64563	62.666317	168.76996	215.40569	48.11606	212.21426
"1553199_at"	127.62576	195.56532	80.10255	66.72438	30.498772	59.016247	53.7334	45.523407	46.301727	95.04375
"1553202_at"	882.9014	307.15256	505.32553	1596.6481	891.8366	595.15607	609.9536	293.85834	436.28302	771.1201
"1553204_at"	850.1852	729.8057	1549.8727	649.98486	794.59393	907.0464	1538.913	102.861084	748.98926	993.16345
"1553205_at"	1571.869	1088.636	1532.6732	2037.6974	1963.2148	1523.5554	2162.1953	546.75385	1317.6354	1073.2416
"1553207_at"	834.8261	453.45697	1446.471	1594.1053	1500.1843	1463.7062	1312.9807	528.6615	907.9579	803.4405
"1553208_s_at"	935.78107	566.35065	1633.4125	997.7925	993.8454	802.99304	1279.0364	178.7511	538.4348	939.1798
"1553209_at"	210.2208	280.80115	483.6777	572.6698	945.5257	490.02698	1210.269	377.4728	531.90735	628.6115
"1553211_at"	60.620876	175.96861	55.206203	52.06869	110.89878	73.623474	78.86216	37.570065	25.856266	156.58974
"1553212_at"	920.61816	1890.276	1616.0442	1471.2195	768.10315	1204.2853	1052.2429	899.25525	500.22034	747.09406
"1553213_a_at"	37.48042	21.544014	59.79465	31.20879	57.099464	47.15878	130.59576	22.316542	27.938145	23.503561
"1553214_a_at"	283.50928	142.13882	280.9516	223.22214	468.32843	286.38312	486.62335	188.0129	72.5472	655.48816
"1553215_s_at"	275.81815	164.28531	246.72098	437.57053	258.1726	1636.0854	241.75334	147.59193	694.87366	167.84212
"1553216_at"	350.5139	750.73615	397.05765	1214.8007	823.8393	446.46884	504.26724	528.9609	670.15643	634.68585
"1553217_s_at"	796.0773	916.70056	506.96365	834.921	910.89307	899.3056	1088.7305	627.62915	524.95624	823.6221
"1553218_a_at"	15073.173	14777.579	14241.2705	15732.718	17070.27	14339.666	12423.205	6695.326	6793.01	6933.4863
"1553219_a_at"	179.9651	91.82421	180.53587	526.49817	202.1382	484.06412	178.22324	1265.9972	422.46445	87.93187
"1553220_at"	1001.23553	503.91592	1159.9592	826.1531	1636.4072	1770.527	1113.6445	660.33026	862.11005	811.012
"1553221_at"	1247.8682	1727.6042	1607.593	1108.4171	1780.2637	2033.3898	1567.9158	818.56915	934.8358	1717.3489
"1553222_at"	1865.7533	1466.4979	1703.3027	1880.4835	2359.6123	1598.9861	1831.4403	1530.0538	1773.1206	1357.525
"1553224_at"	156.0125	209.37521	806.58954	265.27753	720.28107	130.74275	462.92053	43.730152	668.8763	102.019165
"1553225_s_at"	1248.2968	1506.6274	935.0116	1863.4269	1623.5487	2219.3452	1101.7704	984.66296	668.7317	916.6246
"1553226_at"	236.55728	639.4519	1113.5554	447.29578	84.23872	78.53835	783.3337	51.261436	84.98073	90.19858
"1553227_s_at"	2476.131	2469.62	2162.92	1742.2987	1953.8713	1993.4982	1750.04	1559.4825	1341.1521	1343.8982
"1553228_at"	390.43378	442.85757	637.37164	624.1465	458.13397	94.82408	701.38196	110.98539	43.869392	31.211374
"1553229_at"	421.93414	390.7234	941.8112	126.42543	1112.7324	1014.2914	547.77496	572.04285	124.10578	220.76442
"1553232_at"	688.2989	484.93625	1272.046	1027.6221	687.9724	767.0133	853.1928	675.54456	215.86035	103.95732
"1553234_at"	708.1541	1049.2347	1189.0114	191.86871	857.30597	151.3647	437.8009	375.0623	418.32132	219.82553
"1553235_at"	354.64236	207.27762	231.51556	361.79	127.76781	204.4087	65.309296	85.187515	73.94224	51.03815
"1553237_x_at"	1535.1047	1044.4858	1305.6603	591.32605	584.7321	1298.9266	1024.8077	500.78125	764.32117	560.661
"1553238_a_at"	1448.0491	673.0751	1289.6935	897.8668	992.4345	1253.9298	1447.7367	970.14923	1307.7799	1361.1901
"1553239_at"	776.2719	795.2964	740.68384	899.4476	1613.6771	607.11163	779.453	742.8766	1007.75385	751.7381
"1553241_at"	851.9379	406.18204	936.2433	816.1166	389.2865	423.66895	341.06808	423.95914	303.07718	1373.2799
"1553243_at"	1484.7877	552.3785	3263.4297	1412.1145	4301.3154	2789.093	3176.5894	617.7953	574.77264	397.21762
"1553244_at"	58.652077	22.109528	52.7249	185.73282	231.27579	63.608955	68.5796	1001.6681	661.9971	14.04252
"1553246_a_at"	876.8682	481.48383	1114.436	472.2899	1416.8544	748.0069	150.14009	942.4753	650.2827	543.079
"1553247_a_at"	742.5649	349.5738	786.0504	1012.6619	737.4563	584.55554	774.2198	265.69302	254.08444	988.6128
"1553248_at"	92.39475	423.31906	946.7943	75.11228	538.6973	262.6742	472.76596	353.4601	327.85342	635.0938
"1553249_at"	132.17055	288.69547	643.962	567.0112	155.63992	258.94193	369.39893	140.54114	191.30383	423.22534
"1553252_a_at"	878.8772	1182.2142	1014.3436	493.35727	1241.8698	594.2953	888.0988	1178.7048	1007.57697	904.41876
"1553253_at"	1469.2228	1315.4089	958.99786	1111.4142	1473.3855	1353.982	1750.3795	530.24097	305.11844	1717.7673
"1553254_at"	323.56232	212.36423	447.28708	1029.0908	1474.0806	899.5973	435.85065	374.28235	287.91443	153.04758
"1553255_at"	194.35234	95.99553	185.14265	96.88472	592.7378	271.6361	599.0009	201.77383	145.57852	320.48605
"1553257_at"	20307.908	1069.2031	8376.677	8301.422	20303.268	17053.633	15872.141	489.27286	137.47598	825.5555
"1553258_at"	120.09072	261.1454	150.60815	105.42022	179.57887	230.70665	120.57222	125.587456	684.27594	74.96855
"1553260_s_at"	1253.5948	527.24677	1431.217	341.40244	999.28546	1067.994	753.84784	499.02408	630.05725	666.2706
"1553261_x_at"	179.86282	162.61191	133.66583	304.84363	159.81416	197.66862	35.70381	558.21155	459.46414	238.55162
"1553262_a_at"	390.4845	369.09616	1758.8029	1593.9463	1221.7311	1937.9877	2009.4812	1279.2983	1569.6425	1828.8492
"1553263_at"	651.8574	594.59753	1232.3489	2286.63	3552.2263	1651.365	1795.6259	546.2421	680.95306	125.972916
"1553264_a_at"	6716.269	4632.2495	7416.811	8827.573	11157.795	9219.635	8054.009	504.35455	654.98145	1737.6982
"1553265_at"	129.1163	24.371485	424.57574	90.816666	227.18687	199.7915	257.98734	394.1856	284.303	176.66014
"1553266_at"	52.654297	77.95984	25.923815	86.606995	100.97089	16.131758	24.908976	8.082677	5.8580823	70.461235
"1553267_a_at"	639.6604	161.29912	532.44977	444.64493	756.6956	568.17725	283.59143	396.8675	456.74643	143.23225
"1553268_at"	257.91614	154.62733	288.69885	522.8301	399.96118	56.06547	424.2182	385.1749	663.3735	408.19153
"1553269_at"	792.48615	237.3816	356.28735	201.18294	842.62445	425.05133	628.9175	572.4143	372.17642	325.34103
"1553271_at"	439.2334	165.02298	238.26825	40.750313	66.63123	461.15686	384.45496	261.3642	27.185429	389.6139
"1553272_at"	1007.12274	1652.2988	671.782	383.87717	1059.595	691.53455	499.25296	530.0137	745.7415	817.29126
"1553274_a_at"	1149.6375	1097.6377	1440.7997	750.5603	1335.2272	1258.8324	994.6698	3270.542	2902.6714	712.5047
"1553275_s_at"	388.66086	388.42526	373.04022	457.76865	365.21863	337.56454	656.95526	397.88867	315.4933	659.128
"1553276_at"	19.323128	43.64207	77.959564	19.69382	22.248089	64.496315	117.888855	87.46259	45.197685	12.714685
"1553277_at"	434.84766	281.1969	377.6619	292.0787	423.57684	264.7456	256.14465	198.91974	386.64944	183.46246
"1553279_at"	116.42117	101.94192	284.81772	142.29565	218.29225	387.8349	292.26462	229.70107	288.10437	452.95026
"1553280_at"	942.3172	1147.8938	1065.279	1022.6786	688.50995	776.304	918.1001	710.9822	768.7178	655.0574
"1553281_at"	69.769485	99.09958	191.26039	98.13161	74.289	100.404434	63.55164	65.589645	122.69508	51.1224
"1553282_at"	68.05446	82.21027	89.11344	52.21287	97.263855	133.76799	129.15842	68.40368	49.381092	68.02321
"1553284_s_at"	2190.1028	2467.1602	1529.6056	1372.4429	2134.7126	1797.3275	1299.6859	892.4702	1213.7614	1287.285
"1553285_s_at"	165.11156	155.7154	287.6585	368.04626	180.9825	382.10956	305.37646	233.15181	50.422405	73.510574
"1553286_at"	1125.1154	1516.9617	1685.2511	1482.0469	2268.2463	1721.4624	1749.3043	974.11414	1022.267	1019.5813
"1553288_a_at"	1338.0546	967.68463	2115.8276	1850.7831	1521.2383	2654.9775	2071.1147	929.8614	847.74884	815.0054
"1553292_s_at"	968.5378	1669.3893	925.9527	703.67206	1195.1686	580.03564	509.69012	290.35684	335.9203	1868.3981
"1553293_at"	420.20923	295.4641	227.67987	90.808556	79.62927	352.25464	49.515247	243.01804	105.89019	170.5699
"1553295_at"	54.679775	20.06227	7.762352	31.49921	24.730907	24.380684	165.66508	16.383427	166.44327	80.06644
"1553296_at"	202.02094	200.09714	2231.5413	248.14362	82.86614	360.18805	87.69005	158.37596	30.61547	164.77522
"1553297_a_at"	1662.9552	1287.4586	2090.283	2026.7261	2210.1584	1253.4944	2321.4136	629.8737	1132.2574	641.369
"1553298_at"	41.402653	41.951202	56.807648	26.363085	38.836914	62.80911	76.98603	167.90381	162.86136	187.10287
"1553299_at"	237.89677	109.253494	306.1471	29.431583	21.074167	347.74472	200.51389	33.545414	266.9717	11.924665
"1553300_a_at"	50.55821	471.28125	489.7465	435.35776	304.8201	380.69138	267.61832	782.62085	1029.9283	653.2164
"1553301_a_at"	754.2119	1660.1685	717.49036	644.3816	324.5479	898.69293	639.75494	299.37732	511.6856	873.709
"1553303_at"	608.94775	1253.5015	283.03107	186.55414	288.58994	342.0576	915.5029	71.497696	132.61336	756.6443
"1553304_at"	690.7454	675.87726	794.224	533.37463	810.08606	976.1184	823.3519	762.6125	1016.6344	530.73346
"1553306_at"	133.91533	87.234665	473.72415	75.15179	675.59875	457.39697	492.8371	92.53649	552.067	1067.1664
"1553310_at"	325.20645	494.47006	118.385895	620.9905	66.02034	239.9395	378.6233	22.22392	153.1974	415.243
"1553311_at"	198.93556	117.04082	36.257324	442.4443	65.34196	297.7383	42.046535	15.716933	314.95355	244.84433
"1553313_s_at"	710.42505	526.226	893.59894	668.0846	979.20013	293.4197	620.4313	925.7011	1216.8346	438.59714
"1553314_a_at"	113.05234	80.41339	332.67102	147.75044	903.34314	114.87281	249.67392	145.09473	152.09048	214.06871
"1553315_at"	61.54267	255.81302	60.56482	105.05552	628.90234	290.68118	48.58785	447.6606	694.28503	49.125145
"1553316_at"	442.5628	21.52436	410.6741	224.7205	266.20404	248.39893	203.17674	188.52274	50.102604	233.78323
"1553317_s_at"	37.222164	175.08337	267.7948	141.88832	34.702053	323.6724	354.9024	18.114132	14.148968	182.69554
"1553318_at"	283.00906	651.2027	79.3861	988.9808	814.34424	1014.2223	564.3741	642.89264	619.9098	141.30212
"1553319_at"	219.32916	135.24756	516.00854	158.53873	682.5356	70.5767	479.3454	29.746561	362.75034	424.906
"1553320_s_at"	78.96832	59.182648	106.833694	7.8955207	179.10625	43.290634	45.36261	15.592758	169.43541	58.929417
"1553321_a_at"	354.80334	433.60486	632.2003	657.27576	860.6374	896.3761	236.40771	129.35843	383.6154	201.98335
"1553322_s_at"	1435.2562	876.6896	1137.8191	808.2679	1496.0236	896.7035	1113.5669	2893.8628	2151.7952	353.9909
"1553323_a_at"	802.2186	358.48672	1475.3907	869.8437	1530.7319	881.64966	909.17474	97.90186	121.66899	966.1803
"1553325_at"	241.87105	518.11633	496.77286	207.6834	698.60913	502.23334	411.36874	220.97295	916.44684	332.02692
"1553326_at"	725.78766	57.587498	737.9844	562.42737	313.8453	745.2009	1015.1328	287.69257	641.3748	183.9624
"1553327_a_at"	99.11479	166.17941	246.60492	140.79855	616.9621	93.65619	119.00217	51.8253	64.64769	58.841846
"1553328_a_at"	303.74496	133.80534	206.15692	188.59572	162.09038	207.62502	482.0927	217.0855	445.46075	414.83698
"1553329_at"	79.086555	237.3192	549.71655	422.544	362.1229	365.2505	151.5531	278.52814	253.51614	100.764885
"1553330_at"	464.1713	55.696796	342.24857	133.75014	416.3988	203.05577	496.15228	106.42888	45.57333	62.193214
"1553333_at"	116.598946	16.941038	40.810192	175.2125	68.176865	13.856878	48.834698	6.3340435	146.7752	16.944212
"1553335_x_at"	920.7155	122.88897	441.45105	49.225365	776.2779	510.75677	258.34988	259.13577	437.32797	429.74225
"1553336_a_at"	243.67978	573.40405	432.30045	617.2349	185.43689	669.5666	180.24391	721.9045	699.44824	61.402218
"1553338_at"	768.51825	500.44464	567.7293	1284.2075	1134.8285	1330.6432	1242.3948	1507.1489	1441.9574	383.66583
"1553340_s_at"	193.30138	501.94943	472.63486	404.04135	246.55058	118.367004	204.81125	99.35089	346.934	754.50555
"1553341_at"	209.6854	83.82038	192.88751	79.00792	673.4291	210.76501	545.19824	81.08755	165.66045	27.35112
"1553344_at"	45.43086	11.42061	188.17409	26.464905	77.76378	324.95905	271.48294	9.705777	82.54945	42.791718
"1553346_a_at"	806.6084	1062.7463	780.2301	565.27277	1142.4335	1172.8276	730.50604	840.6946	991.4201	612.1709
"1553347_s_at"	1286.3762	1167.9656	1707.6792	1987.716	2290.389	2642.9363	2173.1743	523.6669	617.51715	472.00226
"1553348_a_at"	1729.4059	1660.2031	998.3587	1652.2308	1618.054	1169.4913	1228.7124	1882.5461	1846.9164	2211.5488
"1553349_at"	906.1608	325.36478	920.4365	569.6776	860.23834	906.7017	375.19858	855.58453	434.71436	2063.2334
"1553350_at"	1960.4005	1188.0209	2147.1921	2296.4397	2474.0864	2000.1033	1886.1213	49.076385	79.19293	1112.4303
"1553351_at"	395.00464	198.05261	422.04782	638.209	87.71512	469.0094	572.5162	17.80444	146.87656	739.62354
"1553352_x_at"	563.63916	243.58966	203.93439	91.84553	109.56346	127.57228	115.49553	167.59871	509.21225	94.07631
"1553354_a_at"	1998.7568	350.92767	2826.2937	189.84344	1782.9996	1246.2196	937.41095	100.790695	121.92214	208.32692
"1553355_at"	127.656456	120.25476	279.1122	65.620804	144.23254	145.10074	277.37192	22.983982	44.6557	89.05929
"1553356_at"	227.48726	39.28154	87.64416	48.46597	70.21528	57.678406	277.1217	26.15978	50.12402	20.405266
"1553357_at"	548.9907	234.95924	80.285164	44.16333	749.38965	854.05646	79.49047	19.854815	52.81095	741.1287
"1553359_at"	206.61142	125.85228	250.28189	210.32922	381.36542	192.22133	388.41254	87.24175	206.86147	80.68366
"1553361_x_at"	372.7783	102.72394	270.4742	193.33333	305.64276	223.27702	285.60623	99.592995	154.87498	125.43676
"1553362_at"	5.6090527	64.11994	28.934324	22.51113	180.8225	146.17603	109.87741	65.69607	25.45095	51.465916
"1553363_at"	103.77209	340.17783	100.74506	518.16846	94.1319	41.37243	177.3123	80.625885	94.73189	266.37778
"1553364_at"	62.32685	203.04317	91.14382	412.38873	419.258	181.74985	366.9035	10.1410475	328.23883	31.942133
"1553365_at"	409.26526	58.96841	57.843353	166.99413	232.0566	284.05417	212.00015	269.7755	373.13654	39.37963
"1553366_s_at"	984.9479	1827.8442	993.0871	139.40187	326.27414	303.94223	385.9847	161.75874	129.31773	2651.5095
"1553367_a_at"	970.6994	253.68217	1284.7098	1091.6605	1169.8505	576.86383	1068.9015	703.04083	1448.3489	141.75815
"1553369_at"	113.695854	112.82672	147.7854	46.836933	83.422325	88.7817	43.92635	35.08364	76.67554	306.94907
"1553371_at"	2285.7405	488.11182	1493.5835	1206.6742	2368.1135	1616.1587	1480.589	95.460526	198.89981	439.83655
"1553372_at"	103.77056	185.3906	267.1771	178.33757	151.46753	236.38985	117.69738	603.2056	232.7401	141.8113
"1553373_at"	574.1621	243.99586	482.50458	197.4788	732.79974	549.7865	486.80432	284.5861	623.7335	321.82553
"1553374_at"	69.36901	23.181452	138.77216	137.4386	25.653336	46.213345	93.70095	23.322195	24.628977	239.00706
"1553375_at"	1027.5057	112.51019	307.29056	324.24127	808.3428	1365.4753	999.4492	207.49617	54.929558	105.50244
"1553376_a_at"	224.44026	64.973755	521.31573	195.1399	230.90796	317.00586	79.06348	292.16385	532.8348	49.46405
"1553378_a_at"	116.991615	160.1724	974.965	447.90424	930.47394	411.75967	954.31415	56.413956	67.66676	501.2
"1553380_at"	164.726	17.806591	52.103256	49.693066	32.810905	19.88434	128.77487	40.354996	58.70275	37.800312
"1553383_at"	57.30974	106.578514	43.74022	43.493797	58.150135	53.27421	30.467836	147.53316	27.817602	14.543016
"1553385_at"	64.66323	93.54196	107.83717	90.11062	126.45686	57.883686	183.07436	278.1575	46.0378	36.803032
"1553386_at"	66.072815	305.01746	749.6307	390.34952	76.507164	467.8343	362.039	299.27588	339.01163	1021.31726
"1553387_at"	458.24823	414.81638	658.0967	497.39273	1018.4195	256.53757	125.12577	270.34094	532.6659	559.87195
"1553388_at"	41.265926	31.806942	507.13693	85.90772	160.54645	160.74596	105.26315	143.05022	204.45474	248.27473
"1553389_at"	179.44353	317.9964	570.85846	672.4255	610.3894	706.77057	553.6536	472.86935	449.06943	653.431
"1553390_at"	180.00476	277.8526	108.701805	356.84714	76.47018	499.9245	128.35226	57.504734	381.84253	60.002747
"1553391_at"	97.9905	549.6214	55.741814	371.46518	338.06018	52.417797	37.48159	153.87198	174.9712	154.9057
"1553392_at"	235.27943	238.94247	37.55331	36.482048	339.0368	45.18427	31.96745	145.04898	366.64166	30.296736
"1553394_a_at"	477.4568	352.15637	52.986496	194.49927	232.26408	486.8264	494.9229	149.99272	80.66277	342.29944
"1553395_a_at"	1351.9398	539.7855	1708.3578	806.11584	2074.715	1031.8503	1929.1492	338.50296	460.56387	890.15405
"1553396_a_at"	5946.3667	2582.6648	4289.7017	5110.5747	5797.9507	4258.9424	6371.1855	375.61	67.09972	1066.9343
"1553397_at"	1997.2439	1625.551	2689.9243	2266.9756	2455.038	2236.1013	2823.4314	962.29736	1125.4691	1622.0964
"1553398_at"	88.67991	239.36287	446.1334	267.4914	147.82797	233.03087	480.05905	179.31467	77.78182	350.2306
"1553399_a_at"	72.77776	603.2975	1149.1068	392.62982	587.3067	934.9566	149.3775	61.071556	155.12784	855.2588
"1553400_a_at"	1764.141	1185.6252	2049.1594	1330.3945	2046.4794	2451.1975	1376.2167	647.5756	613.5904	1901.5758
"1553401_at"	728.62604	302.4532	427.06094	407.67245	311.96027	641.23364	454.1119	245.67433	431.24802	471.00894
"1553402_a_at"	508.0927	37.787254	731.3225	69.51532	70.47622	65.32374	134.32483	192.24725	279.44055	164.16655
"1553403_at"	56.43922	34.026466	135.0586	38.476864	86.52229	86.45533	79.1399	49.51958	61.33382	48.852478
"1553405_a_at"	1028.074	426.69684	616.5823	562.47034	780.0615	675.33594	1258.0017	194.01967	256.31357	409.11743
"1553407_at"	352.13443	177.85133	389.34476	411.5056	537.49066	211.78603	466.7775	91.7142	631.5574	592.64264
"1553409_at"	59.697166	57.296413	84.63924	71.650085	227.00641	36.80919	47.266594	17.825346	27.66694	24.466988
"1553410_a_at"	51.571266	190.59422	195.44395	36.844955	59.751556	73.41592	76.31544	35.277287	31.987522	77.55032
"1553411_s_at"	173.83278	97.59421	168.09569	343.08588	218.68585	378.24594	306.01755	215.42868	377.8708	397.8119
"1553412_at"	319.42798	80.12516	327.5747	436.58633	118.33463	761.0927	436.08853	60.192474	94.47277	869.73206
"1553413_at"	90.31972	72.01083	93.31973	125.790245	119.22942	94.1168	52.60878	48.377914	107.51467	35.046387
"1553415_at"	1237.6941	1049.8065	1023.0837	1673.174	1906.9365	896.4326	918.0263	87.86734	67.539604	150.79138
"1553417_at"	761.33185	340.12296	898.2649	469.8369	454.07513	623.4234	970.74664	295.46677	450.4102	573.5883
"1553418_a_at"	165.2125	42.073875	163.07784	280.3496	62.619183	29.198158	204.7437	393.90115	100.62899	275.57278
"1553420_at"	348.38177	21.273949	129.99739	265.87045	151.34247	439.3023	149.03009	153.23483	253.14067	190.67523
"1553422_s_at"	980.429	1237.5123	510.25293	70.03983	629.2003	719.9353	136.88403	157.17168	716.5929	6010.3457
"1553423_a_at"	23.899048	193.52882	108.6194	192.24754	40.63597	409.11084	141.57101	508.0964	356.2674	55.954884
"1553424_at"	159.10185	87.32393	93.33181	76.53889	144.60513	86.0368	280.48654	103.47363	58.109673	234.11398
"1553425_at"	355.4703	526.37213	1084.9712	720.314	350.23392	105.093506	152.3208	393.83307	91.24401	341.69504
"1553426_at"	555.98694	480.04385	1239.7936	473.4798	1356.4512	946.5757	942.81195	261.8465	240.86557	519.02905
"1553427_at"	104.69267	284.53726	120.776985	369.416	98.056915	73.648315	476.25977	146.33643	60.025555	51.497177
"1553428_at"	274.56052	112.1325	512.3722	221.50487	215.99348	75.223755	579.16077	21.052834	387.84296	272.82947
"1553429_at"	219.6243	319.2915	417.1433	631.96594	176.00273	206.04393	920.39124	106.331696	390.0515	362.4495
"1553430_a_at"	316.74393	84.11634	101.88117	82.00817	381.1212	68.16545	597.07965	344.05502	791.66376	305.5265
"1553432_s_at"	438.25458	428.8764	125.490036	559.12024	711.30597	354.68356	284.912	52.688274	60.48437	427.49234
"1553433_at"	374.93958	178.4464	456.48245	119.43444	24.969355	194.37503	123.12967	70.7398	24.37113	30.524286
"1553434_at"	149.14793	111.02334	65.27494	472.5725	549.95026	136.79399	170.13446	63.94281	313.74393	202.26682
"1553435_at"	305.552	180.32703	102.11641	37.27808	175.83427	261.84708	129.57945	59.96062	200.80153	431.46494
"1553436_at"	93.22739	310.03854	737.63837	512.93756	1229.6542	505.58585	589.0592	72.40957	472.69205	914.5114
"1553437_at"	1066.1416	773.382	1062.2535	897.9847	1381.5791	1365.1428	1616.7667	418.93005	679.5135	714.91077
"1553438_at"	1931.2428	546.8792	1286.7667	1006.99225	357.9895	893.1573	2126.806	416.5339	733.34894	330.50754
"1553439_at"	585.7273	454.643	272.52933	188.79793	486.37332	297.85617	434.05032	304.55048	278.38977	455.61844
"1553440_at"	226.6785	17.530277	164.543	31.931759	475.49097	128.24036	372.58926	49.882824	20.015697	19.669167
"1553441_at"	8.7390585	4.1662	8.680598	14.109256	220.04356	19.450415	22.765368	7.3986807	72.18539	5.5899096
"1553442_a_at"	1306.0398	111.17676	1452.6731	426.06552	2844.6052	2832.1484	1753.6003	359.78653	409.478	64.453804
"1553443_at"	289.67386	130.0447	168.28708	258.0808	731.60345	332.7482	532.3118	370.2189	287.31198	187.49954
"1553444_a_at"	240.73553	164.1522	165.64525	232.19809	221.45534	194.32297	563.85016	136.15605	147.07153	88.095825
"1553446_at"	1008.4561	411.85852	1042.1064	385.99243	1232.623	717.1018	166.79176	283.3839	295.20676	466.08
"1553447_at"	472.276	310.79602	768.92633	34.337307	361.01947	405.24963	410.81613	49.787193	107.91881	44.761677
"1553448_at"	26.160795	26.875051	26.125717	16.373772	35.581367	32.258736	26.658747	38.9072	59.062332	30.314486
"1553449_at"	626.1934	441.8182	1310.9717	895.65894	1007.60895	1134.3788	662.64136	772.1523	560.02985	639.5377
"1553450_s_at"	778.70667	103.626656	885.13525	704.86176	1386.177	568.1707	152.15874	483.51733	681.52045	143.27391
"1553451_at"	90.26687	45.47316	50.80358	43.82354	56.87717	32.31506	41.641964	33.144207	28.433058	64.18667
"1553452_at"	316.6368	321.58	386.29227	475.9299	735.0644	491.49768	296.4786	237.96808	586.30066	485.17087
"1553453_at"	961.88525	560.99164	1152.161	739.92847	824.2121	242.99194	919.29645	508.0183	564.88354	1322.5376
"1553454_at"	228.95232	162.43704	73.17375	326.21744	215.84851	283.58868	121.67347	117.50279	214.2663	196.85947
"1553456_at"	155.49698	268.717	135.17285	309.69467	189.23488	157.11781	618.74976	353.73358	131.14192	460.28058
"1553457_at"	79.66706	371.4777	92.22928	47.562725	117.8807	85.1613	136.81837	32.39027	68.932625	85.09913
"1553458_at"	694.9563	724.21014	522.89246	193.59091	1487.4929	790.66376	1232.1732	420.44177	158.15514	259.301
"1553459_at"	79.71496	316.63046	70.72582	89.397415	96.095695	51.370777	158.34259	91.79979	80.49311	119.02037
"1553460_at"	46.27871	31.978756	61.90009	32.885994	78.739975	96.1156	66.82031	23.850874	237.04985	28.686005
"1553461_at"	256.21875	306.89957	290.34076	244.76372	31.383974	126.80153	237.74524	71.22466	237.1464	228.98976
"1553462_at"	241.39748	139.198	623.64716	309.4539	492.75748	497.84555	473.01355	460.2079	317.7313	467.03903
"1553464_at"	415.2749	300.93115	122.646	409.3639	836.97406	1398.6848	738.6958	811.6065	721.74426	512.89294
"1553465_a_at"	53.227108	87.87132	53.089455	33.551376	81.592384	47.988483	66.88783	58.05026	52.73055	570.3713
"1553466_at"	919.9383	921.4697	549.82245	886.87524	1028.313	986.5888	886.4786	579.38617	686.34283	836.3624
"1553467_at"	673.1535	182.91101	125.34386	274.37274	913.42676	175.3987	228.40218	16.671658	454.38623	75.46251
"1553468_at"	19.730265	46.442806	168.05493	215.1655	546.22864	381.96017	80.32411	246.3694	417.50952	312.10657
"1553470_at"	67.81739	24.006487	669.7563	267.94696	484.68387	229.98936	507.37036	109.318016	96.777405	18.93151
"1553471_at"	84.35828	247.58347	841.8939	435.49173	356.43695	285.6229	389.11258	482.02188	446.16846	458.32803
"1553472_at"	1040.2484	620.6715	1004.0926	500.65167	1170.8339	548.8703	580.9747	53.318943	699.6933	230.20694
"1553474_at"	8.104729	26.751001	35.0413	74.0165	286.828	36.714314	125.11905	11.815123	297.44052	9.153599
"1553475_at"	47.499344	73.19897	125.43396	91.8991	148.26204	67.2605	58.756226	26.62945	51.35357	22.593176
"1553478_at"	556.0047	55.576023	229.74266	169.29695	156.53279	111.78552	187.01834	151.63286	131.38998	136.55894
"1553479_at"	2425.035	1580.5486	2266.3367	3275.4946	3198.727	2323.86	2252.6606	276.24585	401.33426	2730.8286
"1553482_at"	23.664675	13.106764	39.653534	37.335686	57.938515	38.088104	51.83194	13.836037	27.961027	11.436208
"1553483_at"	46.578976	251.68887	227.9141	170.0967	163.62692	180.55786	48.35524	47.30067	64.902954	620.66785
"1553484_at"	246.91437	142.74039	374.7201	132.05621	403.94955	59.96805	214.63441	279.91995	398.4255	198.98596
"1553485_at"	196.6482	170.26205	259.58994	572.24255	500.20914	179.2318	946.80096	259.88345	470.69696	61.025116
"1553486_a_at"	415.33612	207.59662	592.8623	55.547543	537.19916	322.09946	650.0485	38.476254	483.7548	241.11098
"1553488_at"	80.45326	96.427734	102.67148	108.94059	142.46835	201.99216	101.33064	106.897705	98.73798	75.57475
"1553489_a_at"	49.114918	74.44832	113.942535	63.82087	42.148804	72.603546	111.23967	26.31394	49.10359	43.143005
"1553491_at"	407.67743	731.10925	1001.59906	727.61743	242.27087	666.6055	380.8181	490.5733	762.94354	624.6333
"1553492_a_at"	133.40575	88.49178	125.41335	384.3493	148.1202	170.73682	135.75935	37.73997	44.716316	175.40787
"1553493_a_at"	546.6158	384.77698	959.9251	380.94257	257.38507	508.01285	187.74043	461.6971	408.1607	600.31274
"1553494_at"	26.841742	31.321695	410.03217	37.725834	63.355392	50.55926	19.675917	37.634544	167.44403	10.824278
"1553497_at"	180.79907	55.038315	76.615265	81.982124	496.34128	192.83665	32.50104	47.5852	87.85663	113.092316
"1553498_at"	94.1683	364.24518	857.6291	324.66904	826.34814	384.3152	211.85179	274.89648	740.2199	95.17389
"1553499_s_at"	1149.8134	861.94434	1927.2422	1384.2987	1466.3428	854.95087	625.69196	492.1893	644.43384	963.5051
"1553500_at"	320.88696	50.90805	450.16016	816.33673	416.4862	137.97035	453.0201	66.739555	273.74634	302.1396
"1553502_a_at"	457.28247	581.30756	245.47969	592.75433	160.5937	494.4849	744.8857	366.4262	1066.7621	150.25267
"1553504_at"	672.3313	436.33698	470.65152	645.8479	547.3705	814.151	692.8248	414.83438	382.42365	433.70337
"1553505_at"	641.1302	343.87915	910.267	645.39386	1253.2635	535.99866	1106.7252	475.03268	553.3723	168.18169
"1553506_at"	695.2703	332.50284	480.48477	394.75446	664.20087	328.679	346.74805	62.23741	175.88902	223.84056
"1553507_a_at"	1659.4055	1510.4276	3382.6836	869.09906	2703.4124	2493.4766	1775.9757	539.3326	797.661	892.10065
"1553508_at"	198.49377	373.4713	530.45416	666.6958	430.94778	939.9041	608.6971	507.4103	604.6545	499.75592
"1553510_s_at"	3482.6294	4938.44	3549.6453	4420.9155	3886.3313	3834.2854	4331.947	5030.942	4975.3955	3840.3335
"1553511_at"	1034.4875	995.8841	393.50275	1259.1954	324.91367	1170.3761	1128.0541	444.42392	778.12585	888.4404
"1553512_at"	484.453	393.57083	247.96153	290.67206	268.89316	611.4501	230.84398	57.23456	451.1195	66.91172
"1553513_at"	317.4256	18.290665	96.97088	156.51607	52.448982	76.23306	200.60347	37.78116	29.178867	29.621504
"1553514_a_at"	676.99054	488.44397	762.35016	529.22095	809.558	811.91284	793.0779	739.4666	530.9332	508.96317
"1553515_at"	512.21045	239.57349	215.94229	523.08795	794.4288	183.11569	709.82166	461.87326	434.70834	528.29846
"1553517_at"	292.4519	44.97943	137.09982	66.052704	128.04991	68.95849	87.84081	121.64492	160.42006	55.69275
"1553518_at"	564.84576	60.794262	177.53654	422.3407	166.51907	274.67627	47.000977	255.77258	293.15143	425.96866
"1553519_at"	28.341246	81.62238	56.8895	48.375957	129.73726	86.70635	67.5206	40.304287	62.50823	301.9185
"1553521_at"	121.627205	173.41917	441.60123	517.5555	274.24136	297.032	101.35449	417.4256	618.2943	381.72156
"1553523_at"	513.77356	454.79	601.355	254.86858	803.8893	727.0483	805.9327	470.11014	499.23877	214.63396
"1553524_at"	332.45047	26.19953	344.4499	369.27252	717.8182	359.85474	240.35867	161.43275	470.68234	48.012386
"1553525_at"	85.269485	59.294724	112.76184	100.65462	226.1221	163.00621	244.46487	145.89697	62.29887	416.84628
"1553526_at"	166.80708	164.24072	244.05951	434.06793	302.9961	793.9014	279.29208	437.9551	365.8195	984.64966
"1553527_at"	734.92755	420.8071	604.34814	597.1256	743.32007	578.7063	541.35095	325.77704	686.5171	541.86566
"1553528_a_at"	1122.0831	487.12805	696.0434	526.04144	869.5319	727.1199	799.7616	2410.6472	2191.0225	622.98944
"1553529_at"	709.4102	263.0413	865.16296	508.35712	645.5484	394.93903	809.5657	390.90454	520.65533	254.34166
"1553530_a_at"	3615.6453	26600.377	5862.1475	3014.257	4019.6682	4966.153	5492.144	50497.633	67241.86	13433.12
"1553531_at"	85.60934	108.94228	389.79324	293.0109	571.5181	188.31819	720.3016	27.998026	61.16333	233.48691
"1553532_a_at"	1008.22345	672.2238	264.11548	637.03674	926.1695	586.11426	258.1217	465.6815	768.449	436.63248
"1553533_at"	568.9458	551.53796	1109.8234	709.348	1619.2914	871.49786	618.4177	345.86023	545.5054	316.9908
"1553534_at"	851.0379	484.31747	857.6095	729.2175	1111.9695	882.2572	466.222	75.58781	429.55914	466.35846
"1553535_a_at"	3063.6804	5321.2856	3385.474	4855.4834	4098.742	5221.581	3814.0054	13997.731	17881.846	3181.3696
"1553536_at"	572.0349	552.8559	942.3487	496.26883	985.1929	390.45035	845.9091	486.61075	560.92834	442.75458
"1553537_at"	271.8082	49.85589	89.66506	68.59865	90.875046	81.31893	51.85581	38.335762	68.41506	36.65725
"1553538_s_at"	187817.5	144545.02	180564.19	154206.94	206280.52	167160.31	181402.73	95680.64	103669.25	157491.52
"1553539_at"	109.67703	39.81223	143.62585	101.88583	233.61176	157.52423	184.1198	44.590973	131.54662	106.584404
"1553540_a_at"	779.33264	333.51425	1181.6504	774.7775	1323.4342	1138.8463	180.8756	176.17174	693.95374	588.9215
"1553541_at"	61.201004	156.98505	226.8094	65.37821	268.38104	296.38806	639.2997	97.66301	381.4806	77.29332
"1553542_at"	1034.9984	722.0963	846.2077	632.5069	831.9618	887.918	692.05536	781.3552	767.30914	814.8462
"1553544_at"	720.0306	445.31845	306.61316	778.23096	1409.6915	943.6518	920.83246	574.9192	893.6191	524.041
"1553545_at"	407.11984	139.6378	47.162624	96.56855	58.612698	89.18788	98.529335	29.699871	32.318924	22.19326
"1553546_at"	13.18781	19.130842	19.416174	14.1919155	19.209309	66.89688	12.659219	16.647106	40.036713	14.852917
"1553547_at"	388.99524	342.07028	924.4947	426.27698	782.0209	713.62524	457.0415	344.63425	323.29013	696.58575
"1553549_at"	481.9969	81.97997	642.5643	273.6886	1010.12823	650.3876	560.0534	83.38575	248.91731	172.8786
"1553550_at"	107.6728	56.545834	106.84041	89.119774	79.89946	102.810135	90.94067	104.55668	100.47654	67.15055
"1553551_s_at"	153547.2	127212.766	156935.8	128449.77	171748.06	123892.35	154981.36	104060.9	108380.445	146143.72
"1553552_at"	47.368595	138.873	110.5215	116.67664	77.38992	235.865	348.70737	61.125614	89.38777	352.255
"1553553_at"	220.35161	469.15485	251.25128	550.1562	1070.5477	635.2719	768.5521	279.88156	556.57385	545.7702
"1553555_at"	238.81961	301.61127	612.2284	668.34607	294.55093	606.97375	989.078	112.373215	861.2744	700.24646
"1553556_at"	488.87445	273.2533	56.789288	571.89825	171.88312	163.62392	349.71384	44.898518	280.40482	150.4958
"1553558_at"	237.87668	263.27142	760.9737	99.88386	67.74187	219.11127	48.198692	193.66325	425.67697	304.2092
"1553559_at"	390.40912	431.03342	712.95325	788.91754	475.1766	588.0549	802.09174	656.9517	1747.7491	347.0585
"1553560_at"	175.00656	270.5474	478.92697	215.1959	786.36096	157.10664	322.11948	43.014668	478.43243	273.80002
"1553561_at"	448.13525	438.54968	899.8773	391.97464	1015.71313	716.6266	387.03427	415.9763	556.7337	485.66418
"1553562_at"	998.7216	770.6846	1960.9358	1175.6063	676.03674	936.1774	759.33234	460.69107	281.08563	910.3578
"1553564_at"	2206.5876	718.8442	1540.9889	1074.6057	2258.1711	2079.7585	1771.4991	324.19183	456.24597	858.3109
"1553565_s_at"	146.11703	93.2705	431.57666	60.43229	228.55605	349.82562	104.79387	1231.591	1408.678	50.92824
"1553566_at"	1789.9639	725.62665	1623.373	1653.8967	2143.6057	1997.7777	1901.5824	631.07214	662.23895	773.2128
"1553567_s_at"	166493.33	136343.03	158329.78	145492.75	182561.89	138541.97	164433.9	107695.01	128592.09	140352.0
"1553568_a_at"	394.20633	644.2194	781.023	496.64395	739.07184	793.1689	409.73074	435.1235	888.0988	590.2298
"1553569_at"	202382.34	150247.94	205999.66	168417.5	229434.36	176424.42	214036.94	120830.06	151924.83	163973.92
"1553570_x_at"	210179.38	158787.17	217416.56	178243.34	224365.1	177986.7	220380.7	127569.195	163071.08	172534.28
"1553572_a_at"	1419.752	536.5097	1368.4332	2749.4138	3335.8433	1500.8285	2964.3804	974.9681	1392.8453	41.51485
"1553573_s_at"	59.160374	33.22725	101.5091	51.88857	93.34562	110.52888	119.34294	28.15456	77.12826	54.69557
"1553574_at"	324.2821	323.2554	409.58505	531.2663	634.8712	414.19943	477.66122	556.1571	645.76196	282.2086
"1553575_at"	2295.8765	1048.5553	1437.682	1509.5664	1349.0216	1437.2981	705.36456	9479.612	7661.6445	3279.3865
"1553579_a_at"	281.5245	24.722462	631.9072	283.2447	736.6091	560.9984	464.14218	308.03302	487.4986	544.3749
"1553581_s_at"	3765.201	5191.784	4474.8804	3499.3462	2705.7349	3792.5476	3002.471	8193.544	4879.814	2835.8254
"1553582_a_at"	885.0899	960.46954	1034.3177	634.338	1079.3215	827.3549	885.9024	592.3054	1337.8896	586.4166
"1553583_a_at"	1482.9097	676.7784	1342.5815	1175.9078	2163.1082	1488.4775	1715.1272	844.22833	738.7781	872.2046
"1553584_at"	154.30948	391.50473	680.37354	524.2521	939.2477	360.68134	246.77367	141.28587	391.04156	389.7825
"1553585_a_at"	505.04315	450.56583	82.02469	62.810875	217.43967	400.53333	69.50378	242.67908	450.12817	34.467445
"1553586_at"	1664.754	182.86179	1877.3951	817.679	559.59344	636.73035	1248.8025	227.19826	809.5847	451.68927
"1553587_a_at"	1036.3009	895.5073	1532.7139	1612.891	1449.3636	1319.1583	1859.9652	7777.727	7120.584	30.891308
"1553588_at"	214751.75	171762.56	214262.44	196256.75	212711.38	178235.83	226996.19	109865.98	127123.09	173130.55
"1553589_a_at"	406.5188	344.6137	267.00366	434.92917	89.35937	197.45807	330.91464	66.97961	241.29823	473.6339
"1553590_at"	110.07742	124.029045	294.88223	196.39322	218.76303	140.75516	251.57852	96.65934	182.47188	412.3924
"1553591_at"	400.45123	75.771576	175.78651	139.6086	198.29643	163.89563	212.57968	157.48643	407.61105	75.976875
"1553592_x_at"	85.32709	120.186264	264.23544	114.792046	191.8396	143.5893	116.143074	157.77744	520.37164	49.492325
"1553593_a_at"	76.830925	393.82483	658.04877	638.38135	1378.8029	292.4314	624.88165	59.075558	71.924736	1966.3739
"1553594_a_at"	1808.9751	1694.8698	2170.159	2133.5894	2591.6484	2425.9211	2815.6487	1520.4418	1676.4496	1329.8239
"1553599_a_at"	448.8757	637.93915	180.56618	615.0949	201.4108	434.64008	48.98063	298.79388	57.03632	916.7206
"1553600_at"	4175.7036	807.6479	2451.4023	4453.9604	3853.2417	3292.8147	4365.021	307.43393	54.971714	1675.7562
"1553601_a_at"	4217.0796	521.69446	3429.0356	7771.3154	4422.787	4490.4443	5106.006	43.556896	75.03175	3953.6265
"1553602_at"	487.9164	618.0218	966.5561	408.73184	1145.9293	590.99493	778.6226	80.6706	491.2646	700.5867
"1553603_s_at"	1878.8335	1593.6068	807.95996	2077.209	1714.4438	1816.9683	1279.153	2096.5364	1756.431	2621.5288
"1553604_at"	2.9942768	112.661644	132.64745	1.4855937	42.42045	103.49894	20.273321	1.6677532	63.283073	52.604218
"1553605_a_at"	5.90024	15.939148	8.799603	7.4614797	16.192093	117.38088	150.92326	74.04105	11.392645	14.80685
"1553607_at"	95.068436	179.04732	213.92522	152.74055	116.481186	215.45837	77.33836	113.6146	103.18231	5.553629
"1553608_a_at"	314.12292	118.11693	179.67278	30.510233	164.6741	114.09113	140.38826	95.240486	164.71169	49.064808
"1553611_s_at"	725.93524	2515.1846	462.05807	2001.6116	533.6759	1066.2267	645.0429	868.9063	423.19855	1384.6335
"1553612_at"	938.5682	680.8784	1043.2709	933.99316	872.62775	935.8582	1104.8627	813.7234	522.0142	918.2948
"1553613_s_at"	105.64738	293.58804	385.90317	372.72568	239.21313	176.34781	774.2379	385.7909	394.44763	188.92267
"1553614_a_at"	428.9968	472.05807	332.92554	449.93137	111.89587	108.82607	141.93439	126.121376	41.995415	98.27443
"1553618_at"	345.4218	463.8392	400.4163	473.09558	321.3872	736.10693	461.69336	108.52268	190.14984	203.97525
"1553619_a_at"	77.95494	309.44977	894.46027	276.89197	365.7042	101.661545	609.5416	144.58948	552.1506	559.0629
"1553620_at"	49.282978	23.604628	42.264786	40.655502	31.384401	36.92874	95.41789	29.600458	49.5377	15.376242
"1553622_a_at"	569.35986	314.8033	618.29114	1283.8374	1280.9012	589.5481	656.4936	283.81305	196.89449	304.12616
"1553623_at"	174.63512	171.25426	129.78633	153.1811	120.829	237.11522	327.4931	128.04738	35.097557	73.66834
"1553625_at"	1.9825326	105.631805	21.485153	16.935852	108.98458	145.53111	310.98877	19.950687	32.043037	112.95688
"1553626_a_at"	226.8521	280.51706	475.9595	160.29521	261.4105	68.73043	622.5489	155.13467	276.81476	249.0958
"1553627_s_at"	34.140224	293.59482	154.00012	535.429	45.667446	406.00833	105.06753	83.39818	140.01671	360.96442
"1553629_a_at"	61.996975	44.733986	94.34548	116.58777	96.41893	53.671303	63.912903	28.922623	86.02726	47.3721
"1553630_at"	1127.8042	555.2936	790.07	1661.2819	734.9534	1031.8239	943.7841	89.40219	27.497421	192.06035
"1553633_s_at"	733.593	483.15912	448.63916	245.38553	800.7522	370.15335	519.5028	126.14036	199.68848	856.077
"1553634_a_at"	1051.2517	216.3259	342.1437	394.44498	610.0704	737.35004	1031.3225	145.43852	687.1257	308.07108
"1553635_s_at"	361.06934	349.88568	811.9892	1114.2084	666.7763	826.7221	674.05994	180.08401	148.21834	344.7721
"1553636_at"	21.740765	51.038548	107.42225	17.719038	93.582	14.654829	67.48707	40.52825	24.215117	42.37485
"1553637_s_at"	991.79596	280.50815	1155.884	610.1876	1165.5076	874.4522	1253.411	427.5716	560.48096	781.26227
"1553639_a_at"	1124.6826	724.586	1663.8019	1171.9642	2368.595	1883.1968	1678.0367	277.94098	117.8862	223.43842
"1553640_at"	295.06683	107.54651	134.43016	194.4911	373.24005	261.6279	121.61296	200.33415	159.83414	2916.758
"1553641_a_at"	182.29967	323.40274	672.91174	123.8225	199.64598	59.80362	341.46295	66.53275	81.3442	139.6467
"1553642_at"	1499.8561	1491.8232	1888.9362	1600.3755	3177.4739	2238.1013	1875.0624	1303.1086	1879.684	1672.0468
"1553644_at"	956.5824	419.75458	1242.6218	978.2625	411.32086	691.0586	630.3557	780.94415	659.2723	679.40875
"1553645_at"	608.224	527.0464	29.27512	20.461643	46.36639	232.47282	950.4559	21.089855	43.419735	22.63151
"1553646_at"	675.9415	307.80402	852.74365	989.38654	735.5965	971.60565	889.7868	688.6061	364.37772	775.32007
"1553647_at"	1863.3173	1182.9205	1328.3336	1957.5859	2414.886	1551.1094	1616.2452	1761.2354	2458.4429	1604.4164
"1553651_at"	22.744759	199.45728	264.39505	336.51245	412.41467	37.166977	434.73947	305.6663	684.3449	171.12126
"1553652_a_at"	361.6554	51.04884	118.84117	186.70648	355.96698	25.256506	367.52676	1075.3446	563.0256	369.0603
"1553654_at"	2210.5835	2084.412	1731.7167	1932.7683	2127.8381	2415.9717	1975.4373	439.3885	613.68427	947.1683
"1553655_at"	505.6652	588.17053	562.19324	278.60645	881.7514	496.01276	700.9145	148.72159	285.48386	372.8516
"1553656_at"	1273.4791	560.5166	862.42786	738.1868	1402.1567	1150.397	995.8833	118.92686	229.91336	1144.6376
"1553657_at"	815.821	1077.0875	425.38733	558.16345	587.4115	387.006	1608.2952	63.95661	344.84372	199.23311
"1553658_at"	392.1326	674.3016	739.5889	493.22714	981.80475	407.25998	692.93317	344.28415	660.93634	555.9615
"1553660_at"	128.77983	74.54739	507.6778	222.10832	200.57048	206.23967	97.848854	505.04565	139.11716	144.41739
"1553661_a_at"	284.22446	188.4351	371.2962	401.06384	726.6951	336.1159	769.8322	133.42657	630.1574	361.22974
"1553663_a_at"	378.57455	112.0624	1298.2665	226.2274	326.4689	2275.4668	556.625	131.77293	120.33376	129.93518
"1553666_at"	786.87103	389.08765	1225.2297	800.79175	1430.4604	671.67474	1055.5671	957.8945	520.63574	252.01076
"1553668_at"	1258.3397	741.0682	1184.7441	875.9583	1291.3273	1008.8403	868.1457	1075.0131	976.1042	840.03827
"1553670_at"	140.6176	346.58286	1062.505	205.75829	846.03296	371.18433	771.85846	173.73544	514.68933	654.14124
"1553672_at"	470.04413	597.23645	432.43097	412.96213	733.79755	813.3597	340.40262	952.91583	1526.7281	694.824
"1553673_at"	464.82346	314.04074	103.766945	245.40146	86.75414	328.4058	135.88406	499.20618	64.657776	135.84387
"1553674_at"	484.33917	381.8399	268.0827	615.8777	230.10486	820.29645	468.8485	308.81213	74.78134	381.5465
"1553675_at"	541.5545	350.95377	727.4133	402.8587	961.2698	694.5713	724.2335	417.5757	355.36838	426.1182
"1553677_a_at"	14330.15	14200.677	10633.136	8325.492	11239.952	10879.47	11186.781	8817.876	7126.442	13383.344
"1553678_a_at"	5998.2544	41020.84	11293.635	4274.4473	4494.864	8400.511	9092.276	77672.555	93442.18	21480.406
"1553679_s_at"	902.9767	646.01886	507.41525	894.5732	863.5977	704.5807	582.3378	1639.191	1934.7793	582.70337
"1553681_a_at"	631.2505	1066.6945	1560.8693	990.4319	1539.8864	566.1692	1138.8191	354.60052	1187.0057	852.12823
"1553682_at"	1620.962	1016.325	1621.7954	1480.6827	1288.539	1804.6243	1635.4524	62.335087	305.24115	1044.5177
"1553683_s_at"	2398.321	1084.1963	3212.1897	2545.509	1876.5566	2592.5735	3882.2551	199.48152	338.70602	2199.8342
"1553684_at"	1005.6994	603.4684	1043.5275	1081.6855	912.7067	897.8061	1490.4791	346.49948	224.01323	812.0096
"1553685_s_at"	1222.3508	1159.5332	642.6465	1445.8573	1584.7505	1321.4895	1334.0754	4457.299	3574.7754	465.4438
"1553686_at"	465.17435	724.3557	314.2025	646.0759	944.2434	553.2545	899.1261	395.4323	548.82153	329.3816
"1553688_at"	301.5869	287.56735	471.07498	199.87619	318.33716	508.51175	685.6923	400.99966	984.4959	773.10736
"1553689_s_at"	2088.165	1719.3156	2038.3036	2321.7688	2665.2625	1456.3407	3592.9792	2205.7205	3003.371	1871.0183
"1553690_at"	533.60156	844.6559	1100.267	685.59186	1327.5128	904.83984	803.2619	1291.6573	1360.0569	811.28625
"1553691_at"	212.21364	178.5179	47.136177	51.310276	237.43651	287.05627	357.48758	921.31604	337.4888	439.46805
"1553693_s_at"	1195.7611	747.98444	1561.9706	649.6504	860.1488	1308.758	971.3655	518.9809	552.1017	3405.315
"1553694_a_at"	4543.022	2324.0583	2396.372	3758.8667	4008.6826	4578.109	3044.9675	7140.5234	5803.971	1901.6606
"1553695_a_at"	1338.9016	86.344086	891.3082	830.7392	1310.0837	952.63666	1015.2905	1508.1295	1780.94	1015.25916
"1553696_s_at"	1479.9583	1794.5735	807.189	1297.1833	1249.404	1149.1562	852.354	1023.0193	568.3115	2697.4507
"1553697_at"	290.3079	264.31525	697.3133	307.92358	469.19467	667.9985	432.58862	658.2665	235.2865	434.08124
"1553698_a_at"	331.55133	425.68573	427.66394	628.47003	135.84882	649.2855	384.54135	476.65118	534.95764	217.98921
"1553701_a_at"	345.6132	1338.4382	702.2748	955.6265	1543.294	458.41794	244.95041	117.933655	150.01706	85.30162
"1553702_at"	1107.558	832.526	988.4348	1122.1097	2218.8752	1122.0696	1557.0265	742.5614	1346.2203	618.9753
"1553703_at"	14844.637	21204.084	22803.83	16838.01	21153.898	16978.314	17677.043	8405.468	7126.814	26449.91
"1553704_x_at"	9174.099	12425.674	12676.093	10641.715	11307.926	11660.908	11031.366	5829.2876	5340.0015	16600.643
"1553705_a_at"	122.1064	194.23682	105.747025	371.55804	554.33777	409.1452	130.73318	83.39995	379.90002	193.00203
"1553706_at"	68.83092	37.75199	86.90587	139.03778	436.34332	53.526253	566.4037	276.11304	381.99072	423.17654
"1553708_at"	304.88968	254.52065	136.17043	393.22333	565.7046	441.95023	218.02383	685.5551	566.95624	588.0713
"1553709_a_at"	5192.035	4410.9097	7109.6904	5023.7256	6081.374	5099.641	6047.1562	8888.242	7894.954	4643.296
"1553710_at"	628.1093	215.112	767.6513	839.5317	759.1843	900.3617	638.7786	18.79871	32.79435	958.306
"1553711_a_at"	1568.5679	243.05995	1349.9122	1780.0204	2642.475	1355.7689	807.64923	471.25702	259.62598	2005.7789
"1553713_a_at"	446.63217	410.34692	226.89717	169.55305	532.01074	621.60864	498.59763	1520.8519	2498.4412	469.10806
"1553715_s_at"	6542.6475	9558.762	8254.483	9918.315	8526.434	7832.0005	10073.162	3542.9617	3337.824	5940.2676
"1553717_at"	586.90454	1066.4323	93.5257	232.21263	771.6523	1456.4563	614.8348	848.3351	614.0241	579.453
"1553718_at"	8471.2295	5266.363	6786.919	4956.146	13878.423	4961.165	8872.579	2336.5244	3184.8643	4636.024
"1553719_s_at"	1215.6526	1468.0144	1772.9037	1326.7998	1838.429	1522.11	1323.9054	1086.5928	882.79565	1526.8081
"1553720_a_at"	7170.292	3558.6982	3086.4858	6729.7036	3520.8464	5561.9556	4412.474	80.93921	96.07699	9186.487
"1553721_at"	40.33708	399.2538	207.81741	356.34103	268.71198	394.3612	362.7945	280.50955	215.25525	80.48175
"1553722_s_at"	248.3783	230.53159	425.10837	506.05057	320.0766	386.1017	319.95056	248.7007	517.54016	427.80185
"1553723_at"	497.6675	98.935555	186.94676	103.84884	560.90906	351.03693	443.9401	130.65237	235.45908	116.18969
"1553725_s_at"	2283.233	1356.1227	1627.1038	1673.1027	3221.869	2817.4792	2288.2812	6135.1704	5891.396	489.91205
"1553726_s_at"	215.0446	287.16235	221.59296	113.546486	183.96669	345.9091	327.93744	319.57288	271.31064	502.10645
"1553727_at"	2865.6826	1714.0042	1501.4398	433.44818	2631.6438	3295.845	1391.5513	27.36182	105.653885	172.84369
"1553728_at"	631.7537	1050.0112	685.2661	731.96136	655.2941	759.6313	1096.4733	354.6862	529.6609	712.7511
"1553729_s_at"	414.29453	287.39203	428.10828	211.32901	259.02765	95.286865	70.633606	44.83269	336.42596	23.437256
"1553730_x_at"	833.2276	334.16846	1026.6903	916.41583	1128.0735	1155.9354	326.3924	236.16133	1536.407	893.72266
"1553732_s_at"	785.24774	1044.5328	1300.1292	312.00055	1605.5582	463.88177	1223.5195	1740.4348	2238.2048	1552.8158
"1553734_at"	468.34338	1260.7208	659.747	1104.6584	343.7614	734.44684	756.43085	34.764996	34.67969	459.76028
"1553736_at"	271.28732	267.3324	556.7319	393.74747	217.48883	76.328224	342.5255	188.41289	190.415	336.54138
"1553739_at"	169.0365	101.73753	202.46115	39.73904	233.19557	124.14504	19.77663	47.67251	125.438446	107.89051
"1553740_a_at"	451.15167	140.16171	164.93367	90.137634	503.93073	547.4845	139.88101	959.8717	1107.37	134.86015
"1553741_at"	82.861755	191.04614	60.395386	49.059597	80.27386	120.86223	418.0593	122.27148	236.13107	36.460564
"1553743_at"	1634.6183	983.97876	1609.6342	2910.8604	1169.4396	1774.1007	2155.9426	1122.0482	795.69775	955.65106
"1553746_a_at"	500.87363	108.531334	52.15528	1585.5702	241.53671	252.86378	215.20139	113.84256	304.18076	7812.612
"1553747_at"	64.54847	237.50827	104.999535	394.6483	101.04343	75.658646	327.74432	45.75533	394.90707	74.31644
"1553749_at"	984.51434	729.6427	1106.6919	1513.6779	1319.141	891.8808	1310.8854	520.8235	741.6175	1430.3643
"1553750_a_at"	772.04254	503.7564	750.4165	542.8814	974.1598	567.8114	593.88	1420.45	912.78094	413.19693
"1553752_at"	123.52043	110.996315	71.588326	72.495995	91.24271	140.67995	94.39579	306.7925	115.14114	58.131065
"1553755_at"	170.18501	83.708755	127.94649	67.695274	104.79091	138.13264	195.3026	59.33516	87.84529	80.3755
"1553756_at"	82.85109	52.074814	163.13257	117.2435	227.71309	135.14128	108.24142	175.34914	185.6895	152.63795
"1553757_at"	76.68909	60.259594	111.31129	145.29517	165.87279	124.923645	238.0973	287.16132	42.32571	181.57748
"1553759_at"	204.8062	172.40646	191.4962	202.08418	213.08817	50.707096	149.06425	177.86357	50.248016	145.4447
"1553761_at"	46.52916	33.110214	63.985535	45.57295	101.42954	84.26353	50.455555	80.32474	64.5852	25.624958
"1553764_a_at"	463.1225	181.54114	379.9124	254.6591	574.9292	292.15573	373.25827	17919.016	15731.471	305.55078
"1553765_a_at"	876.13464	177.78299	342.1521	834.8794	1142.6948	631.5842	1250.315	14.431831	24.638958	200.5744
"1553768_a_at"	829.2658	863.952	150.04785	666.98846	875.3524	200.59366	1105.7551	1827.4058	3501.8958	391.29584
"1553769_at"	65.9313	106.67114	162.6522	180.64723	152.43312	85.21353	601.68225	111.22558	155.24335	369.96863
"1553770_a_at"	621.954	618.40204	261.32147	628.42664	194.97903	217.72163	715.21906	122.358345	96.72244	330.9251
"1553772_at"	311.02414	384.97247	288.7616	443.9976	460.46512	421.8781	513.09296	247.9811	319.98508	491.9525
"1553775_at"	187.83017	739.48883	213.04933	139.9159	308.59128	364.89944	180.01889	411.646	447.1783	1251.1237
"1553776_at"	18.293194	82.646706	18.404097	57.49112	199.79398	16.974451	328.75092	75.66662	10.517755	24.643082
"1553778_at"	829.26227	1174.4341	267.16806	951.2968	1302.9595	1028.5638	2212.7607	933.7977	1185.2333	371.35788
"1553780_at"	1315.5988	176.52052	570.4601	751.52374	1026.1709	185.97855	117.97001	644.4877	183.70085	663.12146
"1553781_at"	59.04086	34.256084	171.51811	69.989235	211.71143	122.40519	68.89817	41.726265	20.823362	2.9991107
"1553785_at"	123.42571	230.58705	107.874626	122.8477	1146.4017	407.72397	147.53	36.50087	51.16016	321.53198
"1553787_at"	1260.1814	776.1204	1103.5729	970.0326	1408.5272	1371.7087	1051.4839	927.6735	713.3264	1479.5448
"1553789_a_at"	750.3495	2227.5703	729.2139	1122.1324	719.61523	1035.897	997.453	478.3805	120.97372	444.665
"1553792_at"	265.5794	181.8267	30.0869	245.07675	329.5026	160.76878	157.19641	166.3903	119.96049	574.5288
"1553793_a_at"	712.6571	1026.1582	1372.0021	1217.7079	2342.6484	606.4917	1362.6779	461.95447	786.5427	1945.0005
"1553794_at"	422.18704	247.80206	688.92413	432.56927	200.13614	360.09723	724.8698	248.61604	69.780045	656.07916
"1553796_at"	288.22336	5040.66	573.0627	407.49854	170.85579	1034.3981	488.66968	199.79	630.0591	6926.6875
"1553797_a_at"	43.18868	9484.071	837.00885	246.68834	736.1914	1237.7318	380.07346	69.87509	38.839405	18922.102
"1553798_a_at"	302.9201	553.82684	514.4036	491.30453	837.3996	665.87067	293.99002	93.148186	236.29886	323.8073
"1553799_at"	420.89755	237.44623	284.09464	299.72653	68.08305	300.30014	337.86856	180.88324	71.19452	292.654
"1553801_a_at"	794.27014	674.83356	439.33246	450.56754	302.5096	638.82733	486.17224	380.31754	170.28632	808.1634
"1553802_a_at"	228.42937	266.64023	438.5428	267.30063	380.9167	219.56586	731.144	188.7528	611.1066	109.39082
"1553803_at"	2503.5098	2055.4844	6401.246	811.9312	3688.605	1716.9536	6881.213	1316.382	1726.7854	1819.3651
"1553804_a_at"	874.7637	418.0383	431.76	133.87587	202.80864	420.16162	816.7988	313.41217	105.39216	254.60104
"1553805_at"	553.9957	886.597	1224.1683	869.4396	910.11273	1671.8585	849.54956	655.69415	798.95557	1099.4014
"1553808_a_at"	18.151903	48.381763	35.84258	24.78926	37.07119	58.57355	33.306534	36.331154	23.685177	22.018108
"1553809_a_at"	1363.716	705.574	1060.7411	1564.481	1277.5986	928.8555	1128.5725	594.90625	452.75653	810.68884
"1553810_a_at"	407.52048	405.7347	672.7245	257.80365	647.2122	666.70447	315.3853	1649.1268	1435.3033	374.35385
"1553811_at"	125.8945	224.39381	331.1583	237.18071	29.881773	242.7202	343.51205	116.5884	31.193287	151.07132
"1553812_at"	124.350525	47.629116	109.78403	56.846817	148.1379	276.80338	74.046524	88.36695	117.260216	30.922401
"1553813_s_at"	88.11827	163.6144	366.05377	282.6349	549.5943	92.24289	74.15497	77.92309	455.8637	152.05295
"1553815_a_at"	825.3166	943.9785	900.94006	1073.0078	883.99835	625.8891	504.33795	323.17978	152.10359	884.5771
"1553817_at"	81.629135	263.95618	84.6591	134.89977	72.401085	70.444336	167.23822	146.95744	230.07632	101.87246
"1553818_x_at"	59.088696	57.87683	166.90073	88.36159	134.30145	398.50122	298.29126	39.182293	55.485165	53.47715
"1553821_at"	181.80913	52.67828	438.36816	132.49518	60.61265	62.18485	448.19427	217.02473	321.03537	358.64557
"1553822_at"	47.71592	30.1082	20.085224	17.666101	13.274184	21.403812	17.55831	32.900387	11.57537	66.848076
"1553823_a_at"	409.9855	435.66013	839.1503	746.05273	664.46735	710.6959	920.8511	419.14462	860.36084	423.12943
"1553826_a_at"	152.68315	67.25597	294.21625	221.8119	343.33878	134.2341	136.56544	78.20061	124.053635	145.76971
"1553828_at"	408.5799	198.08768	471.1715	420.7308	1065.6996	280.50214	1023.76056	355.52704	787.0165	400.30362
"1553829_at"	42.482723	15.844213	50.16912	81.3333	180.95166	130.47919	32.166668	32.380978	23.486696	36.096287
"1553830_s_at"	18.958588	59.79376	30.237352	49.25801	75.08468	62.038044	17.78595	17.481483	20.218657	18.150305
"1553831_at"	1188.699	791.37756	1282.5568	1125.8823	1785.6616	1308.5739	1921.3585	926.16046	1065.4569	956.06525
"1553832_at"	314.8981	386.4831	1010.14215	1004.1061	1127.3062	1225.7941	594.7266	719.3024	628.5771	759.5265
"1553834_at"	91.86654	14.172546	16.89573	242.8649	284.79538	156.70815	8.8054085	38.740555	299.4045	17.895187
"1553835_a_at"	502.8623	23.97528	163.61418	101.77605	93.73025	30.854517	75.10164	31.15971	39.109146	49.05332
"1553837_at"	61.38372	31.933142	67.986465	64.12612	69.63876	75.99405	77.581375	62.03186	54.045383	33.77152
"1553838_at"	138.19049	22.553125	129.8971	28.334276	97.66382	30.67856	288.98083	13.38496	31.969954	57.108173
"1553839_at"	169.17395	292.9515	679.75696	135.85887	274.0186	118.91159	202.75488	354.52902	199.29741	210.0812
"1553840_a_at"	221.27872	651.18054	575.2838	965.26337	758.7924	734.45703	401.52173	269.82364	180.17398	504.35553
"1553842_at"	60.82303	86.68235	195.92224	138.96614	740.74854	857.2371	344.19397	235.15872	287.0552	132.02666
"1553843_at"	129.00273	493.36716	106.457405	95.01499	113.12488	110.688	130.8337	115.34722	135.99966	59.24572
"1553844_a_at"	153.60901	418.8637	274.03558	381.82242	452.7408	605.8109	137.58092	272.24954	94.85966	175.94577
"1553845_x_at"	611.41364	507.01633	385.89706	321.6655	480.2152	657.3971	363.76968	570.4158	505.50998	1004.1512
"1553846_at"	48.2944	292.0378	127.06495	84.48015	366.95966	145.78175	151.82983	244.1601	93.93231	1139.3145
"1553847_a_at"	363.573	78.19818	914.47614	150.81656	145.67813	358.7375	170.78615	239.85683	252.89417	328.9214
"1553849_at"	96.03505	16.62195	63.58743	62.028435	87.76047	398.54495	184.43329	323.83533	301.6154	36.36874
"1553850_at"	515.65784	370.1248	1569.9786	1429.5972	1281.6525	457.34103	966.5884	56.155823	47.751514	190.4622
"1553851_at"	214.93669	125.493484	49.20766	21.753218	208.74585	404.8306	45.38184	11.793472	106.09028	10.784837
"1553852_at"	838.42004	459.3559	705.5627	660.07416	807.91296	949.9556	689.82513	762.27954	463.18652	741.1206
"1553856_s_at"	831.2899	204.72197	407.97186	1011.7704	1579.1694	994.6106	654.7958	214.68564	555.1643	487.1144
"1553857_at"	2530.6802	2411.945	2187.7073	2426.859	3256.4932	2192.5452	2114.533	37.581703	68.380424	1114.6146
"1553858_at"	1409.7151	1069.583	1633.9049	1610.6792	1081.8638	1170.0524	528.4428	1937.6409	1451.6221	1570.8162
"1553859_at"	735.48376	105.337555	624.08075	5007.8174	521.4	229.44876	778.548	106.29094	109.54304	166.2021
"1553860_at"	79.2697	55.469585	71.3687	102.856316	161.52368	58.025356	106.07203	22.694143	137.57697	37.19805
"1553861_at"	122.22372	98.13135	48.105766	432.344	340.1582	425.10458	325.0669	118.41539	117.76746	78.699295
"1553863_at"	228.85951	93.39123	290.19446	518.24756	610.39813	314.24368	628.6895	301.08102	669.4672	276.39066
"1553864_at"	44.73975	43.821976	40.56166	53.401913	138.34761	61.77275	366.7557	201.80605	433.77356	81.19014
"1553865_a_at"	510.0821	735.28564	1446.117	1297.2686	1547.2773	682.5992	780.26135	481.89368	620.3342	206.3973
"1553868_a_at"	49.991646	14.124025	14.785369	171.32764	10.766359	3.3771143	100.677826	4.3924556	15.008873	133.44727
"1553869_at"	112.83189	180.26895	233.90178	218.51268	529.777	414.19174	513.1121	186.11595	603.429	312.11237
"1553871_at"	730.1204	987.362	1238.5526	1566.747	1540.2859	1291.5769	1262.4039	356.16025	192.40285	652.41437
"1553872_at"	831.3155	433.1083	1003.82477	968.1796	779.88727	1092.6472	1083.9586	872.40497	1033.1912	740.39276
"1553873_at"	30.047697	32.41716	121.935715	212.57146	52.539223	29.845507	57.222332	26.303122	47.406578	270.41315
"1553874_a_at"	36.08979	275.46338	45.603127	89.53639	146.2754	61.460426	146.36649	25.527067	25.122414	69.718285
"1553875_s_at"	411.99637	183.69693	687.2499	476.9308	747.82495	869.6267	672.384	130.62747	549.69617	581.28705
"1553876_at"	13.670855	30.127462	43.488823	256.7456	111.79614	17.769312	31.413021	25.41449	161.67151	26.678635
"1553878_at"	157.06508	178.08878	441.14255	209.48871	137.62967	399.94385	452.77686	304.65765	485.17603	322.20093
"1553879_a_at"	796.2741	449.16965	97.37425	351.39636	309.41113	58.586857	1021.72766	285.31732	220.98923	87.84199
"1553880_at"	382.49252	74.833595	465.10794	188.6595	141.61433	181.18402	130.74693	59.86863	62.117413	67.369446
"1553881_at"	608.8564	1079.5427	1525.4382	915.2287	1094.576	1206.9523	981.7735	955.38257	887.1612	1064.1644
"1553882_at"	111.30533	67.13011	356.25247	30.825872	266.21765	286.1717	63.371616	19.483541	214.95999	120.7729
"1553883_at"	3.7335694	41.314102	242.05545	120.94306	141.52792	31.674557	197.16017	56.50358	63.05402	105.43948
"1553885_x_at"	293.79782	179.53217	173.2404	13.618358	111.879524	308.32394	96.5939	141.6803	186.69221	155.88513
"1553886_at"	20.872389	13.114023	16.0069	16.847301	21.656332	177.88188	19.288866	22.041279	27.210205	27.7293
"1553887_at"	355.5729	140.67502	549.7098	356.43466	768.20984	625.7352	394.73508	411.27933	285.7218	161.42
"1553888_at"	153.76146	476.6242	1014.58435	788.3751	795.8698	327.15176	1208.7188	642.59186	389.06073	826.06946
"1553889_at"	72.035194	36.64822	40.24691	60.9761	93.6878	73.75053	77.24445	41.395054	76.04559	40.738747
"1553890_s_at"	203.18233	175.80154	1206.1837	241.06482	604.07025	868.39966	278.8036	120.59211	94.46748	752.09296
"1553891_at"	733.3458	325.01523	235.90492	701.8487	1349.0345	516.3037	1520.7375	345.54752	511.87912	453.86844
"1553893_at"	316.0335	733.66565	379.9453	861.69293	812.98694	580.45874	561.59595	78.15405	781.74023	521.60455
"1553894_at"	370.3026	527.1105	694.0131	354.4318	258.04517	380.0404	329.93063	184.7212	484.86374	1001.0998
"1553895_at"	966.19037	501.44653	984.4854	933.5895	1032.1632	199.74994	827.40356	357.32748	244.97324	356.38623
"1553898_a_at"	38.02695	27.43874	55.78604	43.40634	57.992294	38.160976	26.758024	36.58074	30.129602	200.69588
"1553900_s_at"	653.2149	677.15497	531.2948	767.3246	956.0379	699.46954	1175.4685	786.88995	412.0638	766.44147
"1553901_x_at"	978.84015	1246.2095	1281.156	578.0952	422.22937	955.5691	639.7937	1020.09875	508.17136	1227.7335
"1553905_at"	323.17343	740.2317	1046.958	344.59882	747.7606	796.73596	92.15584	58.614933	62.19397	303.53815
"1553906_s_at"	3023.473	2116.7163	3229.2397	1875.0437	850.20074	1224.7839	3245.9448	149.50978	246.68625	1435.6249
"1553907_a_at"	103.69287	169.56427	126.43993	102.29183	118.74865	78.087395	301.15088	34.50861	75.07295	291.1606
"1553909_x_at"	1093.9086	656.19403	835.0536	915.05176	1987.3031	598.7856	958.29004	1021.77716	215.21535	1337.7886
"1553910_at"	432.21072	294.87192	586.6924	590.63983	755.68097	216.71837	333.8888	275.75195	578.824	289.69702
"1553911_at"	85.35903	85.28535	172.56982	71.284935	46.125504	126.0166	60.698334	73.276886	45.740852	81.74774
"1553912_at"	232.3338	10.763087	141.87756	73.34518	127.388054	605.48206	58.00238	38.881615	331.09378	101.31161
"1553914_at"	602.1895	102.40391	453.07758	438.94318	600.23346	614.22485	294.61017	322.83484	112.91348	341.5618
"1553915_at"	8.419527	10.1431	7.848654	340.14502	46.750195	46.923782	24.419222	8.613792	390.5536	58.899357
"1553917_at"	1015.6009	779.86743	1270.5653	767.4189	1126.6312	1275.5632	1016.72107	615.8034	951.4261	503.0593
"1553918_at"	401.7391	63.32365	604.8233	559.90845	108.68976	978.35254	232.10872	249.97603	145.34517	33.35498
"1553919_at"	518.03674	252.39113	584.8645	222.57523	130.34747	55.042007	209.56618	152.86537	134.84325	56.810116
"1553920_at"	195.60808	38.139698	213.69508	149.65366	319.53143	136.87898	105.8547	107.503586	201.14525	311.13574
"1553923_at"	844.5002	315.52112	436.37805	494.51837	571.54156	436.52203	263.92233	362.42133	551.40814	437.5974
"1553924_at"	41.388348	58.23606	93.41711	19.550264	32.00332	52.177395	102.71966	33.86144	21.528357	13.697357
"1553927_at"	148.72543	108.7457	176.27657	135.25029	191.89352	146.56673	157.36542	94.55086	165.09499	86.68546
"1553928_at"	1088.7098	1404.0508	1546.6304	1384.7906	2011.1238	2267.2568	1700.1755	2199.6924	3282.0698	2369.9414
"1553929_at"	49.212074	40.870262	182.8659	64.13985	136.0547	290.66226	77.79542	48.691135	189.77827	35.5804
"1553930_at"	222.72958	92.87482	120.02471	266.96027	60.240147	45.555992	143.72644	19.343245	308.4977	138.63783
"1553931_at"	382.37305	351.08524	406.4823	688.253	152.76093	266.80914	929.1958	349.71112	317.57944	222.86693
"1553934_at"	22.621712	48.14118	90.170334	321.94235	82.32046	86.11002	97.456665	176.26282	26.111864	126.00167
"1553935_at"	40.40544	52.613003	36.386005	48.309944	52.411083	66.573654	61.675385	82.446106	73.85195	60.548992
"1553936_a_at"	71.28009	248.20326	314.72543	259.02505	654.33514	342.61484	428.45724	58.832085	53.45641	523.4021
"1553938_a_at"	49.748524	424.9716	488.52686	230.6504	383.2171	291.57172	171.15785	240.03964	323.65192	30.990177
"1553940_a_at"	1042.3251	479.89902	941.6712	379.32532	974.23804	1107.0028	1018.62354	1006.1199	959.22394	244.63567
"1553943_at"	2522.2888	671.5445	2003.3344	973.3408	2753.6292	1616.1849	1054.2787	928.8204	1469.1233	1229.9918
"1553944_at"	197.69218	143.20102	85.950966	45.521393	102.098465	34.64842	132.93066	128.2993	22.667536	154.66052
"1553945_at"	712.8333	382.95303	374.63324	637.5048	152.11845	864.15216	237.04092	330.82187	317.64557	339.3491
"1553946_at"	147.34084	372.2198	625.54285	306.06247	223.04951	494.87976	212.46436	40.38034	150.58292	91.20311
"1553947_at"	2008.428	1210.3591	735.7569	1434.8009	1192.0898	1638.5623	3699.0154	2459.2827	3065.9822	765.30896
"1553949_at"	103.4153	86.34127	92.28527	68.93428	213.50816	109.66932	92.889854	41.01327	40.35978	170.18727
"1553952_at"	429.17407	104.4546	203.75726	179.77083	901.65625	558.40704	375.86673	512.12866	655.3563	360.24252
"1553954_at"	5787.056	4411.493	4341.3667	6064.805	3135.639	4327.3877	6080.631	5205.2705	2888.5232	5189.9917
"1553955_at"	15072.755	11657.823	16519.611	12413.353	13567.91	12094.328	15215.328	3231.944	2426.8794	6912.7363
"1553956_at"	3034.1033	2575.4106	2523.006	3777.576	2869.4248	2827.8635	3816.0242	8667.538	8378.732	3764.7961
"1553957_at"	1287.6451	2506.8545	1353.5414	1839.2905	1461.055	908.4256	1210.6907	601.2899	764.1062	2012.7859
"1553959_a_at"	10536.718	5949.956	11274.024	9053.878	7216.2114	11181.253	10626.012	9427.551	10104.253	16579.018
"1553960_at"	2392.4473	1571.676	3385.624	3305.0173	2751.2349	2666.3057	3518.6755	2099.049	1780.7238	2691.1777
"1553961_s_at"	3316.6191	1616.7273	2151.662	2930.8613	2721.9917	2151.4802	1293.7734	2317.8342	1977.3324	1822.5773
"1553962_s_at"	1188.6926	4192.867	545.0227	3075.8018	1727.554	1033.7487	3043.228	2389.407	2595.1309	1020.8131
"1553963_at"	5.712611	16.117779	67.224785	13.677199	35.63187	10.453477	15.163739	3.5307415	7.982734	14.558457
"1553965_x_at"	13.834279	47.314972	48.8589	58.481075	53.992393	22.470753	178.04126	19.349697	26.582693	31.396406
"1553967_at"	1399.8301	1205.9838	1288.4196	1295.0682	1707.3424	1336.6005	1488.6978	965.72034	2038.7854	826.0441
"1553968_a_at"	2843.66	2052.8909	2649.339	2293.9482	3073.8103	2672.1523	3339.3567	3517.667	4546.793	2211.524
"1553970_s_at"	1416.9758	9983.244	944.09106	469.7304	306.3695	978.4748	2155.1604	373.75574	338.0156	3338.7568
"1553971_a_at"	3828.6753	6782.0337	4153.939	5254.377	5132.1978	6811.1035	4900.357	3584.1802	2783.6326	15729.582
"1553972_a_at"	1923.7782	2624.6106	1284.8385	1109.8948	877.40753	1764.6665	1305.3296	4213.315	5016.079	616.4634
"1553973_a_at"	197.10133	190.09088	565.4892	335.10355	755.7876	437.6322	812.63873	345.4783	751.11725	94.62529
"1553974_at"	2320.422	8459.875	1897.6523	2123.9438	2405.25	1975.8213	2471.3	2875.239	1518.4779	3226.7195
"1553976_a_at"	6872.23	9801.182	8522.832	10166.265	7126.145	9393.124	8865.163	7126.4287	6964.514	6703.71
"1553977_a_at"	4739.863	3677.7795	2413.294	1877.8706	2396.4006	3105.8247	3862.8857	71.63923	307.55673	1843.3424
"1553978_at"	2825.1663	3117.2869	3966.8196	2197.96	3124.9019	3241.8289	4219.6313	2953.7808	3730.1763	3570.4883
"1553979_at"	3862.2432	8387.403	3149.405	4371.7847	2909.4104	2927.4773	2299.6033	7329.187	6139.705	8235.306
"1553982_a_at"	61.963547	170.00406	94.53964	115.41491	797.85834	81.871956	404.43512	335.31735	99.824646	360.87338
"1553983_at"	909.69916	478.2325	1326.6238	878.22876	661.7584	636.5012	654.65546	1662.0522	1870.5863	818.6936
"1553984_s_at"	2750.489	1953.309	2012.8387	2172.7131	3243.158	3519.6167	4124.4175	15105.805	15049.827	2459.66
"1553986_at"	14151.172	4465.301	9898.457	11103.722	5013.979	6769.4536	6941.4873	2740.8694	1389.6903	326.63104
"1553987_at"	6376.6367	7693.347	7019.5703	5901.53	5361.9146	7618.3784	6295.139	4175.4355	4431.6133	7256.6143
"1553989_a_at"	318.1594	516.4992	555.4905	539.7877	1271.9325	778.618	639.21	335.40616	375.68082	430.47882
"1553990_at"	1024.5181	1523.7258	1316.8734	1176.7208	1661.3644	918.31976	1249.6318	730.1598	762.6423	1050.9366
"1553991_s_at"	1199.0651	562.15295	822.63165	896.0999	1316.6694	889.88477	774.6734	1140.764	1543.6128	338.39154
"1553992_s_at"	1921.5026	2188.321	3246.2935	2302.9187	2703.199	1428.2891	2423.8179	1286.8223	1129.4028	860.40454
"1553993_s_at"	13359.05	15056.441	17780.266	14510.386	16304.803	14951.718	16102.088	7268.189	8200.743	4700.8447
"1553994_at"	2593.6284	697.2911	1554.2715	1670.1556	478.09604	1484.6572	1207.4066	3589.3845	4735.382	8511.416
"1553995_a_at"	3939.2668	532.0498	3234.0996	2034.6318	50.801823	1805.8491	2183.7068	8189.921	15241.128	10142.641
"1553997_a_at"	5907.3687	12788.204	10143.335	7068.7188	8940.593	6696.777	5009.122	4574.696	5258.7476	6933.889
"1553998_at"	22474.152	11563.412	23464.793	29117.234	23624.012	27204.805	23673.395	627.7179	367.2993	16009.572
"1554001_at"	1122.5312	1224.8617	1955.4734	1725.7959	750.3657	991.1472	1358.9789	1872.895	881.245	1961.3759
"1554003_at"	1247.8815	1441.8541	642.46063	1229.6589	1888.5735	1832.1372	2779.059	2527.4292	2400.5615	1760.6766
"1554004_a_at"	396.46658	464.76886	55.45899	592.66736	857.43787	96.02353	343.28485	4560.7944	4547.2847	26.739927
"1554006_a_at"	201.73633	689.2992	1144.2609	481.61438	1857.6282	304.722	281.33752	444.70395	197.70023	139.95409
"1554007_at"	48902.65	50160.99	61725.53	50157.02	48589.543	47790.188	56828.37	1760.7906	1698.7859	81301.38
"1554008_at"	502.85202	156.40187	633.246	74.28984	281.48117	163.26512	565.55255	1678.8896	1838.4525	45.574535
"1554010_at"	114.74881	357.54553	110.36195	1063.2725	817.89404	345.90775	998.7347	2232.5244	2159.949	781.2713
"1554012_at"	10.504565	43.2589	19.61878	32.14808	37.110474	35.511158	115.482765	15.5032215	24.204676	12.5262575
"1554014_at"	1145.5122	2035.9844	1259.9353	1049.4375	1426.0311	900.03595	1463.7241	1122.7568	569.3829	2406.5034
"1554015_a_at"	1616.4972	1960.2603	1382.5575	1493.3414	1974.2195	1523.8691	1473.5989	1563.4678	921.5744	2224.143
"1554016_a_at"	3824.2585	2965.266	3434.4233	3220.7898	5120.517	3219.2546	3963.6047	5344.7236	5305.909	1177.0522
"1554017_at"	1775.559	816.243	1637.9867	2420.701	2049.5208	2170.5227	1978.273	385.90442	268.61264	1607.461
"1554018_at"	161.51245	119.69984	88.65206	194.84091	563.353	110.244354	309.83997	480.64355	392.25046	198.43529
"1554019_s_at"	1059.224	882.08905	1574.0557	507.3282	783.0495	817.01245	401.62445	886.7694	900.88	840.75574
"1554020_at"	380.59924	755.9476	691.04645	94.64136	1011.75806	329.41125	316.80945	1297.4078	788.17487	626.06964
"1554021_a_at"	7081.8237	6345.461	6250.0264	6576.239	5965.526	6641.6606	4755.612	6725.2056	4997.6685	9440.16
"1554022_at"	589.5046	37.852356	181.1454	38.043453	46.902596	58.469547	342.73804	197.23389	44.743027	21.346418
"1554023_s_at"	1492.3885	349.94733	183.8486	701.0159	354.08517	437.9601	1289.7451	746.6998	703.29425	542.3317
"1554026_a_at"	544.7322	111.52553	485.09875	31.801943	202.20334	497.47546	744.6937	293.4223	341.38004	236.40167
"1554027_a_at"	780.41425	428.3113	336.13098	430.2245	318.08087	714.6073	480.35568	373.17062	471.66937	254.14226
"1554029_a_at"	1931.359	2554.1692	1245.5374	1875.6666	1623.1636	1894.6863	1340.2659	2285.171	1856.845	1411.5156
"1554030_at"	676.94403	557.49976	431.4731	404.64905	239.0996	568.5535	538.7769	630.673	757.51117	837.6791
"1554032_at"	44.9043	36.838223	57.57103	51.464653	36.825203	26.576996	56.208138	23.555222	84.74097	42.93797
"1554033_at"	79.531296	74.23818	97.492935	69.32945	58.08341	82.696106	80.763626	55.955254	67.721214	56.48354
"1554034_a_at"	38.49844	460.83527	63.52434	45.630985	76.55474	22.110249	186.59984	33.72538	31.062368	357.79626
"1554036_at"	907.23065	433.3099	427.618	307.51868	326.43237	293.6825	562.6364	1093.4238	1131.8007	358.76944
"1554037_a_at"	373.0735	400.83118	566.00806	510.45514	522.87537	401.2056	494.18723	940.37067	613.3874	309.36838
"1554038_at"	1294.5325	1043.9885	219.45381	516.7192	539.5732	619.2913	805.4856	622.44836	618.2542	1022.2474
"1554039_at"	1594.4421	1024.9359	1242.3693	1233.738	2289.4214	1279.1002	1718.0667	413.66223	1460.857	1595.7665
"1554041_at"	354.76562	381.26486	549.3289	632.1514	311.43445	387.10516	427.96188	386.73105	340.85474	220.72192
"1554042_s_at"	98.131516	132.18512	155.52026	204.67496	299.54227	134.7212	105.5583	254.49858	965.02106	219.65114
"1554043_a_at"	1416.606	702.286	1190.9012	806.96277	1159.7152	1106.3898	925.4776	325.32394	736.17285	827.9717
"1554044_a_at"	440.5753	175.9902	381.05078	481.80035	377.88345	474.55554	978.9027	317.17798	434.52142	549.5702
"1554045_at"	806.5788	94.77767	459.7725	84.04088	74.40572	518.96375	95.25056	261.21948	479.18997	452.88892
"1554047_at"	25.45546	320.59283	210.75235	58.95682	76.22342	217.68393	483.55	575.05225	299.36777	78.32339
"1554049_s_at"	192.89543	1687.6862	227.99487	193.32985	213.64899	236.46356	115.48068	213.9702	291.38992	926.01074
"1554050_at"	1735.8695	830.8173	1128.8425	1004.13763	1391.5961	310.7014	1850.5509	553.0593	777.92706	1017.53174
"1554052_at"	1124.1184	1522.5039	939.3242	1333.4708	1499.9528	1395.5023	1227.22	5171.916	4491.2935	514.8135
"1554053_at"	304.88272	1294.8589	543.24133	288.19363	123.28574	71.41346	636.7729	636.9426	941.24304	1169.0553
"1554057_at"	3266.1755	4134.797	2959.5986	2949.4202	3689.7537	3247.4558	3983.0408	1790.0905	1533.8065	3803.9963
"1554059_at"	1314.9458	1624.1156	1694.6254	1132.0242	2079.8625	1319.2032	1851.7831	875.89105	934.8058	723.03064
"1554060_s_at"	401.29745	1411.5416	594.63086	643.2882	890.83966	758.1456	664.1084	43.81637	230.61761	276.01126
"1554062_at"	663.71204	531.9821	629.38184	445.33337	494.9362	721.97266	93.45024	226.83885	542.43054	587.74835
"1554063_at"	661.94934	1220.8556	734.2973	543.07	471.60938	971.0756	646.87305	633.7327	760.78	1049.0515
"1554065_at"	54.012154	82.770134	801.6628	155.81024	187.57726	136.33499	113.93977	117.0289	95.363106	346.36978
"1554067_at"	477.43765	1077.5048	744.59076	825.0004	242.62651	395.1507	504.75668	283.37314	212.22389	1457.8021
"1554068_s_at"	564.6582	1004.2507	817.35645	722.8844	444.6238	323.9508	902.2424	86.369705	105.70814	1135.5509
"1554069_at"	546.3044	606.23926	430.86188	782.2162	1112.3772	253.10869	77.22229	50.0666	37.926235	2520.6777
"1554071_at"	44.774326	151.38863	43.569942	49.125732	423.9418	24.629868	298.18912	99.63142	247.54814	321.0712
"1554072_s_at"	84.65349	203.8736	267.65204	276.356	470.55215	340.25076	174.31532	17.826593	361.30682	478.17578
"1554074_s_at"	1275.9442	661.9002	1263.1707	889.4068	1862.7534	791.82074	2178.3413	123.81005	586.603	633.3267
"1554076_s_at"	2281.5898	1758.9519	2402.8328	1878.4503	2365.8716	1526.827	2003.7537	2161.2205	2274.836	2075.005
"1554077_a_at"	2274.3606	1527.2062	2483.5483	3309.1108	2450.5276	2430.5984	2395.764	2413.64	3964.691	803.93616
"1554078_s_at"	12187.697	16559.393	11518.502	13710.006	9701.445	13661.264	11749.611	15367.296	16882.092	13219.187
"1554079_at"	2403.977	6313.946	1770.091	3402.0493	4290.1426	2892.706	2867.3503	926.34564	1018.49457	6054.244
"1554080_at"	2046.2551	2765.0872	2442.9822	2207.9365	1434.2819	1240.7825	2946.1802	1872.1857	2199.0103	3185.2754
"1554082_a_at"	2443.6304	1874.4491	2731.359	2874.574	3593.7808	4346.366	1645.2584	6369.544	5964.1294	2034.2773
"1554084_a_at"	3093.6165	2049.9375	3760.0613	3550.6611	3237.8467	4703.1426	3513.9978	4580.53	3693.7852	2398.863
"1554085_at"	1808.1472	1358.0375	3071.266	3125.3445	1196.2214	2647.494	2095.476	1959.9255	2578.163	1959.0771
"1554086_at"	546.8636	569.2495	553.53326	741.1807	417.88867	431.53003	464.4299	641.7269	834.9302	692.55414
"1554089_s_at"	21154.61	20355.12	20049.686	19969.395	18799.791	18930.455	19716.52	11309.737	11495.8125	18334.527
"1554091_a_at"	1713.7297	1267.9644	2677.0603	1521.587	3221.1885	1700.5656	2367.56	915.9622	1358.1207	1915.7483
"1554093_a_at"	5745.19	5238.6484	9321.872	9162.032	6104.8115	6456.979	6653.798	4891.999	4811.727	8333.12
"1554094_at"	919.2286	60.706837	216.60954	140.37466	264.8607	124.51468	102.8023	461.8963	273.4223	51.531128
"1554095_at"	606.31525	631.02515	893.2845	621.9347	576.4207	552.57544	876.122	1223.9146	766.2306	803.90295
"1554096_a_at"	309.5446	247.16559	177.75378	145.04596	55.610962	82.02713	151.84067	573.9109	478.01926	212.891
"1554097_a_at"	819.51697	754.15247	1286.2972	943.9328	1485.917	473.35275	1240.6177	2070.018	3545.8145	637.15216
"1554098_at"	363.57697	434.9116	308.3751	485.0158	369.61353	358.48825	573.25574	312.87457	529.4372	572.57855
"1554099_a_at"	1507.0265	983.96216	1622.2034	1152.6378	603.4458	1214.7097	763.1244	496.31525	309.20007	1153.3381
"1554101_a_at"	597.42035	750.5997	430.1133	312.92548	58.314835	166.09198	353.85538	689.51935	613.99634	524.57135
"1554102_a_at"	1050.5688	1445.804	767.64935	1118.8542	764.2123	689.9104	927.7985	1258.1425	1680.8759	1709.4381
"1554103_at"	1694.2567	1230.7733	1094.041	1449.7203	1757.078	1389.6926	1040.1732	597.7608	815.8817	1500.2386
"1554105_at"	2497.063	2630.6838	2011.6594	2313.724	2142.971	2623.5774	1905.4062	2471.1665	3313.7246	2458.931
"1554106_at"	1523.3407	1971.6926	1441.1354	1153.8073	1504.6497	1174.9845	1408.097	1805.6018	1828.7191	1503.6565
"1554108_at"	486.0424	521.0824	436.39142	582.8595	413.77924	108.428154	439.6862	69.01406	288.92987	560.8372
"1554110_at"	154.02245	222.16733	174.26541	152.90779	168.67386	129.39737	667.6542	482.7681	816.9108	78.333534
"1554112_a_at"	1171.6191	650.24023	230.44292	1243.0609	1572.3794	567.95215	742.4932	1627.9907	1486.8596	1192.7786
"1554113_a_at"	4200.992	5322.109	5097.467	5971.53	7184.2983	7025.6846	5719.7935	1406.6637	1636.4987	3689.0957
"1554114_s_at"	534.76135	362.94226	508.6743	434.98334	570.1574	411.91077	878.0315	305.5059	503.34177	314.78607
"1554115_at"	1146.798	1004.10834	920.77374	911.33295	1301.8755	440.51227	1378.6351	342.96796	1279.2621	593.2341
"1554116_s_at"	89.9524	362.8608	69.70151	862.8155	391.16476	178.82492	167.11736	374.4588	423.6643	462.1628
"1554117_at"	386.33527	284.21863	568.2881	216.37488	739.1723	696.5474	306.1537	155.10448	389.91937	506.2702
"1554119_at"	1082.3976	754.38354	497.63202	930.8048	1260.7402	981.3634	1075.9587	964.5984	1485.1794	748.69037
"1554121_at"	29.993044	53.30056	245.93272	57.838024	167.1448	45.888256	258.76474	41.652325	115.83526	242.83904
"1554122_a_at"	940.0391	311.93433	1635.8668	527.22504	553.5966	450.073	363.83163	386.51175	102.583244	1242.506
"1554125_a_at"	482.9408	415.24863	309.87396	26.106602	392.7742	336.2759	291.56033	42.354286	306.44318	198.7162
"1554126_at"	514.5978	664.43494	2105.3442	742.2712	279.63715	1469.2612	1646.7627	3467.6826	2757.1619	779.24475
"1554127_s_at"	957.98315	523.32184	1525.017	646.20135	97.39044	236.75122	1175.2976	3661.492	3068.6362	565.5613
"1554128_at"	770.9904	889.27386	1125.7687	991.7248	991.77637	943.8072	833.6899	975.7873	613.87555	571.30615
"1554129_a_at"	205.49248	71.05591	232.85844	137.52193	370.88803	247.1692	263.0933	106.90915	96.88336	115.80347
"1554131_at"	26.236807	74.585815	152.92201	13.383076	241.3238	20.973427	10.275128	37.258015	20.819149	4.6100717
"1554132_a_at"	865.9336	423.13077	1115.0057	1010.80975	592.1456	1199.2887	1026.6394	755.84814	594.1728	618.89246
"1554133_at"	23.289448	9.895246	51.97256	277.17062	22.133139	45.787544	35.35885	88.95	193.78679	30.014206
"1554140_at"	242.78926	442.97394	398.16855	248.29195	627.22174	583.17377	732.3092	405.23737	146.21964	202.1867
"1554141_s_at"	839.62244	992.77185	1279.2743	1470.2517	1369.9517	1660.9526	1143.0691	517.78064	505.7737	73.238884
"1554142_at"	17.202478	191.54001	341.75787	23.775333	119.361725	288.52112	41.436626	123.513176	28.074245	75.97796
"1554143_a_at"	883.6448	388.83337	1341.0667	874.6865	725.30884	570.38947	584.28644	269.4448	225.02419	1448.5469
"1554145_a_at"	6963.8315	6111.2544	6282.2603	6505.524	9070.515	7480.669	8455.912	2102.6042	2352.8113	2718.0579
"1554147_s_at"	1366.3352	5929.264	1691.093	2054.631	3080.925	2542.6428	1642.9479	246.1586	476.65506	3293.6729
"1554148_a_at"	3481.6272	3692.445	3005.6428	2849.8757	3730.2358	2832.6858	3622.8904	2840.8906	3045.1494	3374.8972
"1554149_at"	13791.741	10080.014	18990.002	12280.188	16281.098	12955.273	17861.467	10596.848	11009.432	8134.3
"1554151_at"	307.07718	310.31943	439.68735	222.63025	79.0943	640.89087	228.23709	611.82074	999.6881	724.8134
"1554152_a_at"	1458.624	2077.8513	887.16583	1900.5201	3066.9136	2813.0898	1298.6986	3281.7178	2887.4922	914.75745
"1554153_a_at"	7644.62	2608.099	13137.759	7845.841	9883.754	10100.934	6812.8647	3069.5315	3196.1116	2784.2036
"1554154_at"	3364.9553	2173.3887	4054.7012	2218.2385	5951.1177	2353.3137	2610.5066	3843.813	2866.9192	4700.164
"1554155_at"	1442.5956	1802.3248	1458.6217	1765.5438	1355.1722	1021.31335	1393.7382	1764.5618	1712.0281	1606.1349
"1554156_a_at"	78.46376	13.326345	37.901936	15.5299225	64.63531	24.992973	66.680954	21.625576	148.93323	40.126385
"1554157_a_at"	318.44803	308.00345	736.27673	716.33044	130.28178	637.9909	738.71405	262.08685	545.0849	380.27344
"1554158_at"	27.198729	244.08887	60.810123	16.101603	52.178265	102.964	303.47784	327.40646	50.619408	178.85052
"1554159_a_at"	2063.7573	2785.7747	1918.8821	1987.1183	3301.655	2752.1697	2305.1616	1961.7655	1653.1819	1075.6034
"1554160_a_at"	1754.1973	2352.2493	1348.4202	1503.2878	1590.9097	1388.3612	1808.3613	1246.1123	1224.99	2041.5979
"1554161_at"	1729.4846	2487.2534	1678.1714	770.1319	1686.8517	898.98553	397.84613	151.15852	115.72977	2536.0068
"1554163_at"	619.495	294.20828	423.77115	660.9618	324.61398	450.1618	781.4065	828.5794	595.1907	245.89818
"1554165_at"	141.10727	62.440697	136.96622	57.778416	78.57988	296.36682	128.04007	314.90564	227.6501	66.1721
"1554167_a_at"	7336.0244	9589.323	7768.8813	8139.165	8304.694	9320.917	8657.545	11982.951	12394.242	5329.4263
"1554168_a_at"	2499.6775	4813.223	1369.3391	1946.997	1922.5078	814.0159	2631.3767	7997.546	6880.831	4681.6875
"1554170_a_at"	2279.5376	2115.1938	2035.713	1789.9366	1733.6096	1375.9283	1600.0974	1873.4855	2713.999	1429.5258
"1554171_at"	1940.0671	1623.676	2610.0881	1896.6158	170.61198	2405.8438	1184.1726	2169.1726	2222.1248	1480.5428
"1554172_a_at"	1310.7098	922.0282	605.81024	1637.5015	2250.2996	1683.1487	1061.1489	1237.1357	1017.8643	873.06354
"1554173_at"	585.9321	348.2918	796.0349	755.1353	526.1143	327.77963	989.04626	746.7536	534.86096	221.67639
"1554175_at"	546.305	464.21786	652.85425	214.68124	226.45055	688.8912	490.45227	286.38834	227.73274	766.0998
"1554176_a_at"	601.4082	266.00238	489.7698	452.7593	324.2266	613.98535	540.11774	369.16098	208.08968	1097.0343
"1554177_a_at"	548.0277	466.0612	332.16946	735.7434	902.71277	471.29773	866.946	319.51163	550.7089	1126.2634
"1554178_a_at"	2887.9324	4165.9966	2524.4915	2038.4935	2153.908	2619.4126	1580.8175	1190.4191	591.93665	4560.678
"1554179_s_at"	1078.8998	391.62534	1389.1172	538.9037	1204.0452	1414.3833	556.74146	544.0883	1695.6954	753.3122
"1554181_at"	106.21847	168.44682	145.22415	134.25208	148.29762	128.0983	874.15686	486.89197	175.01039	94.11446
"1554182_at"	223.42845	45.53305	153.44739	161.60602	203.17574	112.13837	97.41219	142.49771	213.01233	258.78888
"1554183_s_at"	928.57245	693.2335	1574.763	1886.9131	1052.9148	1964.989	1278.3018	959.62646	828.513	1026.3635
"1554185_at"	743.97107	2778.8013	1060.3309	934.69696	1110.9193	1056.6195	896.14056	449.3994	454.43127	863.8996
"1554187_at"	468.052	918.9092	494.77097	470.10873	588.2118	761.3689	499.70676	221.11423	93.092705	621.33264
"1554188_at"	85.59465	99.71298	112.42171	56.581146	95.77925	100.30898	107.288086	174.81139	56.18072	117.14495
"1554190_s_at"	43.86262	51.42455	57.747265	99.92609	129.50407	46.749023	81.52996	52.61519	28.167501	23.832424
"1554192_s_at"	1096.3113	1331.9022	703.57745	924.26605	1810.9567	1666.2351	443.3792	1805.1101	1107.3557	477.94824
"1554193_s_at"	2192.2217	507.7225	1712.9065	970.30835	1741.6161	1293.0189	2105.4167	949.77655	1248.3721	27.562105
"1554194_at"	39.674297	30.994368	69.24764	40.307613	94.59478	45.894077	121.3314	30.96636	360.52594	82.46005
"1554195_a_at"	180.8647	64.14821	111.08056	132.02858	130.57117	185.96432	123.56442	223.48428	151.38441	71.14446
"1554196_at"	90.37982	102.84324	97.23524	135.829	45.737686	129.33076	382.83972	122.492805	262.6604	69.228455
"1554198_at"	692.02716	485.35205	204.56902	226.81396	557.8468	329.71646	650.881	102.53658	683.223	571.54333
"1554199_at"	83.38435	53.866684	691.86255	396.71002	652.03296	373.9246	115.60265	50.3694	51.89013	23.532066
"1554201_at"	485.72696	207.90181	332.56458	427.6758	655.4839	422.0866	417.5217	507.55075	542.20184	1272.7014
"1554202_x_at"	1669.1187	1081.3444	2129.127	1259.0819	2754.391	2059.4136	2511.532	761.7889	1215.4017	1327.9958
"1554203_at"	1092.3716	414.82297	996.2972	502.80133	1123.0991	737.9515	1016.8259	526.288	1044.1333	524.11536
"1554205_s_at"	1367.1344	1234.32	1467.0387	1857.733	1445.8984	1806.8809	1532.1923	856.8685	1155.4159	845.4578
"1554206_at"	171.06354	90.58946	31.349953	50.42977	159.94595	113.6855	43.763363	93.07031	167.55264	60.488083
"1554208_at"	2029.2302	1238.0289	1254.271	1403.0146	2351.3157	2239.1306	2882.7139	1114.847	1564.7733	1372.1879
"1554210_at"	24.359089	18.878242	98.099655	369.55554	60.562653	28.646091	46.451027	16.475267	27.762804	18.053633
"1554212_s_at"	284.2865	500.1556	835.09906	285.7429	504.09232	345.60184	650.17114	363.26163	179.11806	365.02875
"1554213_at"	126.293655	276.0715	755.0288	159.80043	220.58545	213.26112	146.90361	1095.7141	834.427	772.3616
"1554214_at"	151.3966	92.581825	629.0071	113.06702	69.02043	83.97736	229.18991	228.68271	470.6859	272.0501
"1554216_at"	24.161888	73.04712	17.923618	14.998774	52.327225	19.968285	20.21729	64.828255	20.579649	11.122994
"1554217_a_at"	414.27838	397.8663	649.20337	547.8696	773.19763	640.9035	330.6881	1085.7578	707.9758	621.0276
"1554219_at"	1689.7263	1299.839	2626.2217	1969.6022	2048.775	1122.6293	2460.1506	894.4526	199.16536	2135.5542
"1554220_a_at"	1044.6259	503.1196	1505.3414	1260.7268	608.78906	1501.0692	1916.7955	649.2344	656.4242	701.3874
"1554222_at"	323.7508	783.2616	1131.9148	1025.5907	1238.0326	906.322	1025.1099	126.19462	222.55852	389.50186
"1554224_at"	453.86053	71.7317	591.792	136.59273	215.21674	55.622368	221.11377	67.00218	129.69318	123.51171
"1554225_a_at"	672.53394	59.64969	576.83295	561.1918	125.05389	494.5336	1048.7784	20.298876	347.3386	640.69037
"1554228_a_at"	1066.1582	1015.79443	811.0146	1492.686	339.76215	1774.6473	173.20438	419.62143	307.95792	770.1548
"1554229_at"	1957.1919	3317.054	2118.2493	2611.996	2738.703	2275.8188	2826.4395	1361.2678	1050.6923	1049.7628
"1554231_a_at"	725.5035	1456.872	738.48315	940.41675	1457.3256	854.24133	1328.947	637.5162	301.07712	251.37595
"1554232_a_at"	326.17163	64.42845	526.0799	258.00424	106.12716	666.09766	209.69171	191.36392	219.44656	536.6114
"1554233_at"	555.12994	154.70604	258.6733	451.29633	425.38388	438.947	342.59027	116.17057	541.32996	333.05286
"1554234_at"	644.61597	796.6162	647.8831	655.36835	467.71927	188.12102	126.01185	309.56683	320.9557	1430.9548
"1554235_at"	309.01062	78.09469	439.95337	332.0532	306.88065	593.40656	500.8298	41.462112	17.275913	137.67973
"1554237_at"	587.39276	576.84595	511.50958	493.61954	858.4927	355.637	666.2949	577.85895	751.43665	348.7441
"1554239_s_at"	3757.0857	5514.5815	3756.542	3852.0466	4680.483	3194.8271	5631.221	2728.4565	2782.8838	2374.1672
"1554240_a_at"	541.6635	407.49377	1036.4164	665.44885	973.3822	1014.33527	852.21875	393.1057	143.74081	450.01343
"1554241_at"	10138.44	16234.849	18603.463	15046.324	22321.508	17047.75	15987.6045	18711.877	18906.494	41457.707
"1554242_a_at"	1359.5574	3469.114	355.31845	728.1852	1012.7357	850.1996	771.1032	547.2971	675.7999	20107.4
"1554245_x_at"	1156.7872	915.80804	235.25406	231.19684	1037.6693	1285.6819	843.63184	1134.4263	1784.4751	649.3176
"1554246_at"	1918.688	1361.5579	1230.4952	1875.8743	2332.4724	2601.2908	2313.8108	88.12692	97.9322	236.56296
"1554248_at"	778.9129	741.2093	1214.6957	959.3811	892.2456	930.51825	635.86456	547.13434	36.321938	995.5867
"1554249_a_at"	2979.5452	2236.2825	3608.12	2646.889	4623.662	4213.0776	4061.3489	2283.1965	3795.1057	1127.0675
"1554250_s_at"	645.5223	185.7071	430.3858	428.91516	391.343	425.28952	535.8382	874.43555	403.54892	538.8593
"1554251_at"	1505.5732	1034.0355	1278.907	1127.338	1758.46	1001.78546	1842.2062	4303.6455	2990.832	2446.8794
"1554252_a_at"	507.63818	370.5238	174.4423	511.1193	474.0003	243.72353	185.37292	230.06303	522.56177	130.6397
"1554253_a_at"	625.2146	536.0682	1328.4403	1291.409	1274.3651	1179.1722	2051.6616	659.1611	890.366	733.6556
"1554256_a_at"	1842.1279	995.94135	1379.7688	1324.6647	1119.2682	1059.6941	2240.6038	897.2678	634.3831	1451.2012
"1554258_a_at"	180.37067	709.94305	640.3287	147.91742	1025.503	1309.7426	714.7514	148.87434	834.4976	824.2839
"1554259_at"	149.06416	124.48344	223.14766	170.07864	284.94818	207.36954	207.83095	336.2936	235.53949	145.14804
"1554260_a_at"	2139.466	2449.3318	2895.5576	1429.1636	2797.36	2849.5415	1363.8967	3571.508	2948.6572	1683.8082
"1554261_at"	303.66074	28.113613	103.76742	40.838886	430.50818	485.64194	65.70854	198.65608	331.8103	233.61534
"1554262_s_at"	372.54932	122.45125	117.00939	307.11057	638.44806	159.07404	127.38607	149.39775	164.53705	104.976555
"1554264_at"	199.94649	85.17052	54.385365	177.66086	18.089943	222.08673	176.77977	421.85895	219.3899	421.60092
"1554266_at"	1145.022	1351.433	437.87207	323.11368	243.54118	887.86255	808.9802	573.71893	364.5631	1392.6412
"1554268_at"	822.5033	386.31467	256.30658	641.103	903.2921	521.0641	968.9266	224.51366	581.0946	360.73422
"1554271_a_at"	591.84814	759.2875	263.89444	795.64325	237.73141	360.93787	419.54272	5012.326	3834.9395	483.5319
"1554272_at"	194.90746	67.52774	21.542604	34.569603	27.426355	39.46921	32.50607	11.388876	55.52364	24.58286
"1554273_a_at"	360.56747	940.04803	43.42864	243.1483	96.95193	226.48616	156.09827	1958.796	2185.813	31.094143
"1554274_a_at"	716.84436	651.1577	1232.9082	966.9187	939.5749	1288.843	1246.5912	1168.4363	1394.409	578.94824
"1554276_at"	123.13671	28.990864	477.8717	279.63968	231.81976	49.2783	499.31946	84.32498	119.3575	109.5912
"1554277_s_at"	261.1255	43.890087	97.397285	35.80692	35.15651	134.3239	29.829884	498.81067	478.83017	130.06609
"1554279_a_at"	323.29947	1042.6868	418.24997	383.9761	440.36816	226.25394	490.91907	600.46454	562.09125	583.82056
"1554280_a_at"	509.74753	542.2071	80.34859	493.7922	743.4736	82.88024	393.4886	302.40036	551.63416	658.295
"1554281_at"	427.1219	113.020744	557.1026	143.62292	122.40777	51.420723	91.66596	19.015343	154.43199	35.98432
"1554283_at"	976.75275	561.29913	872.86597	922.91064	1116.5295	715.7987	819.17993	754.4487	1090.5972	646.19635
"1554285_at"	1094.1057	444.39508	1001.1625	987.0251	1248.1254	775.75385	1283.3467	617.1643	791.4853	785.16595
"1554286_at"	171.58755	299.67645	138.74188	40.029392	97.141884	361.81732	166.79851	140.00713	405.4498	677.3287
"1554287_at"	600.57214	930.2311	592.34015	653.7505	1092.0948	862.26117	537.71735	779.6255	1411.3512	841.1482
"1554288_at"	192.11975	93.95136	214.96248	343.68332	251.22273	311.5058	57.075966	50.692223	54.044205	31.044897
"1554290_at"	1162.3597	531.574	747.2137	785.5738	873.5934	1069.0482	968.1176	364.02386	203.04056	1363.3003
"1554291_at"	167.50142	329.7726	144.61214	247.14455	409.6789	608.44305	425.87863	248.67622	574.30035	690.88196
"1554292_a_at"	847.2353	774.5037	332.22412	901.1994	1176.7704	727.1778	475.56042	907.6553	968.76843	679.1672
"1554293_at"	405.32043	396.37195	757.46783	587.8951	679.0984	1033.7306	478.4601	635.09064	754.38293	566.3317
"1554294_s_at"	224.82013	266.3602	506.58762	369.89603	226.71274	643.5667	397.01028	713.2589	668.84644	331.25974
"1554295_x_at"	592.6562	611.7926	1104.2828	680.2426	1349.9283	520.27106	919.53015	981.28186	674.3757	396.40524
"1554296_at"	35.897095	67.138626	75.44106	16.851702	94.302864	14.859486	281.77338	18.735695	10.310908	33.658337
"1554298_a_at"	42.189636	126.97942	222.56517	74.17008	42.84383	16.99284	142.56331	137.88432	250.2559	98.990005
"1554299_at"	103.23054	171.00006	144.4762	494.6398	140.67061	362.78714	60.305553	94.20465	67.05711	65.33378
"1554300_a_at"	74.365776	67.60993	386.88898	197.20514	115.69654	89.1528	224.48836	59.373787	42.624332	55.89024
"1554301_at"	265.87308	244.78297	621.55023	66.204605	522.9902	77.75339	563.94446	344.89655	433.19543	207.94237
"1554302_s_at"	419.28513	311.4324	749.23926	325.8684	608.58887	623.1236	104.88673	207.282	296.33997	228.11945
"1554303_at"	352.09277	406.35434	784.8671	382.53473	575.6405	97.94871	110.299255	348.0198	413.68625	410.886
"1554305_at"	131.98927	366.7412	213.86714	187.67093	202.08688	608.6198	283.42862	461.44907	174.48703	232.41194
"1554306_at"	348.95743	36.251896	80.29016	54.823227	59.184895	210.0912	375.15683	53.725452	246.1115	225.64977
"1554307_at"	284.2714	56.95624	86.98844	262.36722	471.827	75.67625	480.41855	198.86671	42.094418	400.99966
"1554308_s_at"	618.53235	238.94061	83.23262	158.20013	47.64403	75.13749	368.44012	254.29619	128.31589	102.556
"1554309_at"	305.40305	53.27792	26.701618	274.90802	403.7369	550.41034	366.1875	291.2145	359.78717	81.354454
"1554310_a_at"	1748.2893	704.5317	1121.5819	1023.2392	1744.2844	1788.9639	876.16284	1791.9137	2230.448	938.147
"1554311_a_at"	1123.1632	1604.5409	711.305	1275.5057	2204.7078	1952.3425	1391.5918	1931.6846	2885.5793	258.35077
"1554312_at"	1869.2865	1296.6284	2358.8845	1518.2239	1989.5474	1694.9379	2247.4822	923.3707	1383.9877	1590.7732
"1554314_at"	88.35918	148.52328	115.381935	9.083837	6.786591	156.80258	5.344943	142.2725	250.69836	210.49464
"1554316_at"	1075.81	755.1532	1411.9077	823.3263	1429.638	1244.6813	676.79755	978.7001	1069.104	897.7374
"1554317_s_at"	1213.5961	979.32355	949.3134	786.76984	1462.2145	1380.319	1019.7109	1296.2639	1633.3234	1129.5355
"1554318_at"	1908.1437	1123.3677	2532.5168	1974.1298	2831.4983	1620.9777	2667.5688	462.16922	990.96246	1049.8325
"1554319_at"	8.152684	7.5439863	13.41625	44.47241	24.153826	14.294784	5.954849	10.123059	27.758646	8.186611
"1554321_a_at"	2769.2654	2750.403	2083.2095	3131.7773	2379.5183	2727.3428	2711.7205	2407.795	2552.7896	1553.0359
"1554322_a_at"	92.4134	127.49392	141.43387	211.366	292.17017	172.57414	209.47871	340.34317	477.44562	349.1715
"1554324_s_at"	653.81274	791.5984	227.24402	898.7157	800.5889	828.3742	602.9597	405.19733	285.37268	1025.6472
"1554325_at"	31.88317	53.278763	130.8729	26.285595	51.769516	41.78096	41.427452	31.762308	29.061888	22.576742
"1554327_a_at"	1475.6979	2059.707	1620.4177	1890.2651	2711.3694	2347.1777	2190.622	5806.8154	7101.7715	1377.1335
"1554328_at"	260.26273	14.5871935	426.21503	226.89757	435.15295	182.10416	141.64926	205.99211	235.03601	326.90854
"1554329_x_at"	303.9101	282.6137	444.91513	507.4456	313.0177	211.06775	426.0632	299.66193	271.1284	225.9878
"1554331_a_at"	837.16565	552.94745	384.26663	548.59314	1205.7948	1011.6772	1368.4382	141.95618	752.8212	144.84279
"1554332_a_at"	1272.0602	605.20654	449.00394	679.21277	866.1243	832.8009	1055.5161	190.65047	313.3582	453.72314
"1554333_at"	1225.4203	1921.322	868.4502	2115.4197	2117.9414	1068.0043	901.7984	385.1307	436.25647	2507.9714
"1554334_a_at"	5989.7036	8428.6875	5257.0596	10200.165	10507.415	6033.4604	5832.096	826.0427	1086.5078	10553.275
"1554335_at"	140.8523	95.41136	119.630104	47.077667	40.545513	53.02678	59.079372	17.172438	42.9595	419.23022
"1554337_at"	98.469444	283.0951	557.0683	328.86847	164.58417	379.69098	620.00116	220.8538	569.6564	373.4538
"1554339_a_at"	826.91144	1814.5193	776.98444	1370.7042	961.5675	1003.936	834.8496	1404.275	972.689	1008.17316
"1554340_a_at"	42.996796	30.485487	28.08554	39.520267	88.97145	61.378914	98.254974	203.72351	109.84802	47.313236
"1554341_a_at"	1206.858	548.81616	1479.6345	1577.4581	984.58765	1030.9583	1212.93	848.09064	562.9288	1034.0287
"1554342_s_at"	1720.3087	1126.8066	1858.5629	2839.3164	2168.2615	1621.0752	3476.083	1479.2412	1679.4154	1521.7529
"1554343_a_at"	215.93869	406.60785	262.9083	1164.35	431.49765	225.78804	200.27196	93.481964	90.69063	95.21063
"1554344_s_at"	2791.88	2229.3787	3341.9092	2356.415	2740.8699	2589.7405	3349.4575	2351.0002	3777.0872	2845.3352
"1554345_a_at"	1043.5698	1812.8828	1433.971	1870.5541	1004.26086	1291.6771	1358.8761	1748.3613	924.65936	1483.6603
"1554346_at"	151.207	96.26792	197.07634	126.457375	193.235	72.09716	187.92479	273.57532	84.65374	174.74944
"1554348_s_at"	1016.1391	914.4732	1696.3323	1198.5923	2020.0741	1671.9072	1079.8949	849.2777	607.4865	590.82825
"1554349_at"	41.42771	77.14812	369.2667	110.61133	87.525375	96.41672	159.5673	70.77256	106.232765	330.691
"1554351_a_at"	6120.922	7030.51	4134.5503	4633.325	5010.649	5766.665	4719.237	7460.7144	5869.1426	5530.4487
"1554352_s_at"	2978.7559	1495.5427	3205.689	2436.0422	2711.8362	2125.4175	3181.1052	1753.7959	1474.5698	3407.9678
"1554354_at"	114.583626	26.075432	31.201752	57.632942	76.36467	79.58936	389.94684	14.565717	246.6551	6.597019
"1554355_a_at"	359.36557	64.08516	205.63075	507.55728	351.31644	377.933	643.9088	32.93959	169.35457	65.77786
"1554356_at"	294.4745	32.288048	91.25333	180.90538	126.0562	63.777767	388.614	648.75244	483.9451	39.505234
"1554360_at"	345.39145	65.6586	610.0144	529.8837	1059.0781	499.56345	544.7245	730.0823	1170.8899	80.94251
"1554362_at"	513.4507	189.1463	121.837456	671.6478	647.8417	121.95936	437.2044	67.734985	291.747	471.6325
"1554364_at"	143.28452	202.81844	152.79274	13.587907	41.779297	31.01455	315.76123	27.81583	283.95224	221.79918
"1554365_a_at"	5416.1396	8661.625	3549.0693	4129.0933	4717.997	4369.338	3812.987	7667.954	7247.486	5419.6504
"1554367_at"	794.5949	664.96246	1362.2694	1390.8513	1493.277	1430.4524	1539.2039	594.629	690.79596	617.8764
"1554368_at"	67.58697	26.701504	141.65633	25.86868	31.406778	165.9917	28.248764	9.665515	16.981918	144.31003
"1554371_at"	202.32988	333.588	150.37251	491.22284	498.02283	435.20874	719.6976	749.0038	449.5712	215.65825
"1554372_at"	829.72314	451.3746	901.16907	246.83282	593.04974	587.5728	516.8048	594.64557	848.15967	813.92487
"1554374_at"	202.13219	81.225494	154.53676	120.27681	110.3133	144.49622	100.55156	78.82569	179.91818	336.43204
"1554375_a_at"	21.12417	67.394615	55.69116	17.731384	86.847046	72.195496	54.29687	37.983166	288.5231	53.03953
"1554376_s_at"	1437.804	596.4925	924.56555	598.25635	783.1204	1044.2196	898.73956	811.04956	691.123	677.04
"1554377_a_at"	1284.863	287.761	2183.6216	1114.9039	3554.0232	2237.9275	2353.0034	64.75183	51.31849	293.8379
"1554378_a_at"	45.8396	144.79123	53.40348	101.128876	57.64404	43.77317	39.13052	399.26965	131.6149	34.53527
"1554379_a_at"	185.98924	147.86089	120.19044	157.28546	231.54573	486.27655	483.7212	114.28034	98.78947	194.51833
"1554380_at"	98.380226	41.924152	47.603218	92.52255	54.79403	105.81102	59.318764	78.378784	91.98432	84.50366
"1554382_at"	173.02985	344.07684	936.632	86.243835	190.36302	550.7488	162.56177	52.626427	578.18567	260.44144
"1554383_a_at"	133.03621	104.318665	140.58095	111.05086	221.34538	184.59631	214.99747	2864.7288	2763.7576	141.32095
"1554384_at"	224.99362	204.34808	262.89822	261.27676	160.60342	13.725218	284.86847	27.737444	285.15274	225.76709
"1554385_a_at"	585.0085	896.0752	1017.9002	616.54877	1088.2136	749.461	1014.2957	473.0388	807.1568	751.7386
"1554386_at"	64.59132	91.71057	81.092834	159.35498	151.24916	79.06651	62.646786	57.6395	25.911165	102.863464
"1554388_at"	1442.9421	987.8575	668.9298	646.49677	879.8928	1254.0327	478.9004	792.761	592.7193	1525.4014
"1554390_s_at"	3360.383	8065.9683	4657.0044	4546.095	7626.567	6272.9277	7087.491	18415.543	20211.031	1564.5792
"1554391_at"	821.74243	150.32306	470.23077	368.08832	828.3386	443.9087	144.19827	261.47067	257.95416	403.21875
"1554393_a_at"	2267.6807	461.90588	2098.083	2519.5725	2281.7637	2743.684	3467.1355	966.74384	1739.615	840.659
"1554394_at"	617.06213	286.86676	178.90448	144.05212	46.72157	194.95605	742.762	246.38799	201.77786	111.22682
"1554396_at"	697.99786	546.2307	1721.03	1003.8728	1081.3761	1646.3246	1556.8654	980.1399	1827.4072	1033.3765
"1554397_s_at"	2185.7349	1660.4357	1855.6257	2750.2434	3341.0522	2698.8833	2428.8774	4354.4707	4821.537	648.2714
"1554398_at"	23.52474	207.85414	120.02682	28.82034	58.19681	57.258682	46.60639	134.07741	33.311	93.44403
"1554400_at"	424.39584	383.70764	456.72937	268.71967	386.5794	627.23517	126.570076	591.3675	499.4033	354.27438
"1554401_a_at"	81.097626	72.75355	321.8998	100.474686	150.97041	253.04462	150.5109	180.37666	46.678856	50.88054
"1554403_a_at"	34.720467	24.900204	73.27145	69.26354	23.974487	72.47352	87.41338	11.457917	65.05419	123.42665
"1554404_a_at"	48.72966	34.309174	56.821987	48.034233	57.521324	49.20759	48.22271	34.846924	43.529514	33.661022
"1554405_a_at"	88.72668	120.32183	92.9807	134.48386	198.70148	116.54735	156.67511	113.85308	112.38112	69.43355
"1554406_a_at"	568.9072	451.12436	756.0311	198.03572	889.3852	773.95294	706.5363	277.5819	497.32962	227.61676
"1554408_a_at"	262.453	1571.9998	181.3366	344.01605	857.79724	353.04312	100.75061	24056.549	21499.668	428.72208
"1554409_at"	24.606932	78.29636	300.84106	67.0399	296.4132	381.12747	55.698193	336.5644	480.3093	196.06798
"1554410_a_at"	4245.9785	4354.9585	4410.1616	4854.5044	4420.7744	4042.7703	4359.774	5858.4688	5868.432	2912.5183
"1554411_at"	648.9246	307.32825	1057.0785	637.50354	560.0919	1170.5386	1102.9198	538.2197	869.3543	512.2568
"1554413_s_at"	498.35867	402.47095	538.4321	239.92757	271.2053	343.50992	364.45358	245.42923	300.58112	297.66052
"1554414_a_at"	3956.8125	8697.65	2861.4995	4688.8438	5080.9814	3874.8674	3181.9854	4350.5493	4322.143	7811.104
"1554415_at"	1197.573	1312.151	844.5689	716.74133	663.941	673.5653	833.28796	1592.7571	1213.6013	870.2261
"1554417_s_at"	3258.59	4102.8735	2298.3223	3657.4546	3839.6626	3836.1123	4550.758	8422.158	8361.597	2116.1665
"1554418_s_at"	36.94981	261.95312	356.88947	461.92212	255.26527	196.37993	810.9939	177.91435	356.93427	373.17212
"1554419_x_at"	64.47506	413.10992	849.17957	98.352646	146.42203	97.944824	218.99185	36.747326	146.79265	90.81178
"1554420_at"	168.92285	121.61553	351.5114	236.54482	366.29037	169.99457	1198.4954	681.80896	789.74835	86.60099
"1554423_a_at"	20900.287	27624.46	18020.79	20913.662	22627.875	23687.53	20417.06	18765.363	17593.47	18190.709
"1554424_at"	920.92944	392.82162	566.16016	742.38135	1210.9933	1604.712	221.60728	1207.9437	1164.9255	587.8688
"1554428_s_at"	1846.7368	1743.6649	2779.0059	2257.682	3345.071	2436.569	2379.328	2094.2625	2496.343	1902.31
"1554429_a_at"	5726.41	3766.6191	6760.4873	6655.412	5978.8457	6987.7744	6222.2666	4079.733	3640.0586	3983.534
"1554430_at"	3072.6223	1508.5728	1074.8231	2124.3433	2467.9177	1610.3356	1737.0049	239.80214	250.26118	1475.3999
"1554432_x_at"	3907.3286	3229.7012	2390.0093	4403.2354	2929.2336	3335.764	2607.8884	2186.8694	3356.7524	2558.9592
"1554433_a_at"	3780.81	6360.113	3546.254	4574.0054	4678.556	4622.8765	2878.1282	4072.4604	4871.457	4269.227
"1554436_a_at"	606.801	166.1091	503.07712	114.12947	640.48956	602.90533	486.6227	133.00168	193.2862	245.90472
"1554438_at"	122.32128	191.39249	84.2916	306.1819	43.574226	161.21736	39.880913	921.5359	750.8504	20.769224
"1554440_at"	28.362425	360.42804	124.365715	69.45575	102.14201	96.83646	77.05712	172.66037	42.438522	276.87646
"1554441_a_at"	2400.893	1910.1647	3044.7026	3003.5017	3968.408	3625.4355	3709.8708	9732.15	9496.03	1597.7297
"1554442_at"	3264.9832	1806.1777	2884.5	3228.1829	5128.3	2217.694	5146.33	219.56334	1223.9814	3046.8213
"1554443_s_at"	721.45056	611.74066	712.1897	674.7123	1559.5616	292.5887	1205.3461	318.1801	700.272	268.68887
"1554444_s_at"	1675.2906	1432.8179	1747.1162	1603.4739	2476.593	1477.3589	2965.007	1431.1317	1469.7867	1022.57886
"1554445_at"	56.508106	57.50249	137.41371	240.67105	624.74457	280.77557	254.08931	980.44257	715.6639	319.02652
"1554447_at"	1677.023	4266.6777	4143.493	2956.1455	4037.7131	1295.6127	2376.508	1167.5033	1095.0302	4437.8467
"1554448_at"	718.44714	278.15933	631.56256	857.8405	634.87836	229.61171	450.86807	460.1513	566.29047	718.56274
"1554449_at"	425.13547	762.4617	510.8746	553.03125	382.16574	622.01965	269.73947	751.4894	717.0532	380.60324
"1554450_s_at"	1633.1245	2647.9878	1471.543	1881.0659	1216.0961	1013.1344	1373.6746	3385.5007	1800.036	1209.2312
"1554451_s_at"	2493.0579	2745.239	2794.5056	3158.587	3366.917	4249.7896	3475.8396	4919.931	5301.453	1646.197
"1554452_a_at"	2418.0188	5851.9214	3668.9922	2005.4303	1835.563	2591.645	2843.2478	2771.0286	2244.3223	1694.5399
"1554453_at"	83.03001	335.97043	526.5847	211.60925	455.6042	322.0813	792.3419	286.15634	435.6019	438.12177
"1554455_at"	986.085	1039.5259	449.48517	1275.7422	756.1329	545.42944	459.4708	1119.1019	592.0513	2696.4282
"1554456_a_at"	1746.5607	2329.8306	1981.9183	1379.9388	1449.6128	1550.0941	1013.261	2230.9578	1440.774	3165.8433
"1554459_s_at"	99.439705	22.179344	56.605404	72.52751	71.07374	281.11752	75.7248	37.95774	65.72334	22.44275
"1554460_at"	139.20564	210.54124	93.662865	75.091545	122.903625	214.96242	400.68982	93.434235	117.42127	183.10988
"1554462_a_at"	12515.464	16101.009	4770.886	10309.056	8536.951	8159.281	10859.2	1586.1787	1591.5917	29497.475
"1554464_a_at"	1252.1609	643.5576	1014.56726	1181.1005	1236.2224	1200.0356	2106.7693	12083.422	10659.605	808.7774
"1554465_s_at"	385.24466	695.75854	430.14047	364.41144	556.0998	691.91815	606.64465	1179.2921	890.45905	573.09863
"1554466_a_at"	3073.0308	4925.5557	4246.146	4312.418	2671.4988	3412.9775	4068.6187	5319.7754	7236.7285	3767.7837
"1554468_s_at"	1178.0334	983.7547	958.6942	1498.2378	1258.9951	1937.9705	1268.1495	1304.8519	1470.126	944.7552
"1554469_at"	1088.865	724.959	475.40247	724.6858	1085.1201	969.79645	942.5219	683.47864	768.9802	800.4798
"1554470_s_at"	2932.9062	1696.0544	2715.7432	2947.1895	3812.2297	3166.704	2373.471	1797.2268	1762.5198	1173.6112
"1554471_a_at"	2650.8647	1044.3599	4027.1052	2746.6917	3730.7683	2458.0828	4285.3076	3047.1797	2552.966	2052.9978
"1554472_a_at"	2441.0876	1385.1584	2416.5042	2437.8206	1374.0739	1935.7656	1182.9268	1455.4205	1318.456	2998.9536
"1554473_at"	685.1046	452.7775	841.09155	102.35861	452.86804	686.4174	265.19418	538.8588	165.1035	515.2564
"1554474_a_at"	608.36115	989.23926	964.49774	645.43304	1127.7242	454.77554	792.4905	15090.954	14041.0625	761.2545
"1554475_a_at"	650.13416	1201.0162	842.5682	525.0666	799.04724	895.47974	1221.9014	742.90906	297.27383	614.1196
"1554476_x_at"	2541.6033	4581.306	4265.793	1906.5317	1997.1392	3625.136	3386.467	1161.0093	1018.911	1290.4131
"1554478_a_at"	592.459	479.48187	468.77084	556.3389	713.1206	592.79596	526.4107	621.3889	449.9281	440.19202
"1554479_a_at"	4524.303	3755.1868	6490.808	4406.775	4707.4956	5676.32	4325.727	3236.0752	2659.0425	3509.3892
"1554480_a_at"	2707.3635	1911.7119	2463.595	4358.9004	2333.3738	2508.7402	3325.6062	2487.2603	1787.712	1381.4071
"1554481_a_at"	409.03467	56.421673	711.80804	258.9843	430.54486	471.21063	645.6841	83.62258	135.65591	1158.9512
"1554482_a_at"	3254.346	9323.071	2784.6392	3511.7183	2931.7046	4567.3784	3352.1167	6670.596	5914.6255	6365.419
"1554483_at"	1650.7357	826.2865	1635.0696	1528.3042	2055.6746	1650.7991	1778.9197	891.9848	1268.6099	251.5357
"1554485_s_at"	66.62791	48.987164	78.83243	70.785675	207.69022	76.63762	742.49554	18.64078	22.088322	34.01508
"1554486_a_at"	625.3535	886.8324	607.5291	522.09094	711.10614	586.3487	528.46814	236.89703	567.1	490.09525
"1554487_a_at"	374.2784	381.82944	211.14539	71.87972	135.37334	98.33553	287.47266	133.39966	169.27745	63.18996
"1554488_at"	581.79065	468.9505	1424.1757	1010.5047	173.59119	415.28937	263.20627	643.0185	790.5407	1018.6065
"1554489_a_at"	1775.7045	3037.7932	1989.888	2921.642	2860.9795	1869.0544	2042.1461	2363.8254	2139.7324	959.0738
"1554491_a_at"	101.32688	336.99792	533.30414	498.1548	112.00778	299.47592	584.7	57.297318	482.58932	361.31677
"1554492_at"	88.05637	61.240868	29.21472	15.874015	21.94771	34.270855	9.341374	98.08053	14.290984	42.83119
"1554493_s_at"	1002.4872	1930.6255	642.37744	1113.3467	1692.4268	1589.4137	712.3903	2030.9794	2327.5583	756.3435
"1554494_at"	643.6647	475.7949	236.11868	427.00772	456.06143	306.65985	732.69244	703.9409	333.7054	332.02057
"1554495_s_at"	304.2508	491.65128	605.48883	259.6773	200.61282	555.67487	484.17978	431.1573	92.284874	514.87744
"1554496_at"	1144.1761	72.347755	1540.0023	1475.4347	1388.666	1638.2152	1727.1838	534.3832	739.4936	418.8603
"1554499_s_at"	557.94226	602.12195	659.1435	937.5575	973.4359	1171.5496	491.6392	831.79913	718.08563	249.5969
"1554500_a_at"	638.9464	739.25446	169.60335	1068.3099	563.973	468.95514	336.51102	347.9469	299.12573	2604.9978
"1554501_at"	748.75696	503.2871	777.2093	555.8316	841.96936	859.00305	801.86633	641.0799	1220.4956	865.1011
"1554503_a_at"	1037.307	509.5898	959.9185	485.71912	936.6785	933.44147	976.33685	506.74963	110.48351	337.7015
"1554504_at"	105.43279	193.47806	203.10475	103.18496	34.524036	105.5118	255.83429	8.320276	204.53041	434.76587
"1554506_x_at"	214.91785	219.75932	555.34503	545.16785	599.7857	463.60574	552.74896	146.19727	423.41974	1201.0717
"1554507_at"	12.751521	126.62449	321.74057	50.0703	539.87823	41.94301	154.3581	103.16354	267.43793	1412.0056
"1554508_at"	451.13812	869.87695	338.2004	479.2384	132.66286	421.7624	635.3028	623.36926	762.2444	342.8171
"1554509_a_at"	2078.1548	343.96393	306.48514	1336.6007	1017.8579	2051.3293	1679.7668	2294.5088	2254.6516	312.6576
"1554510_s_at"	18898.457	16447.258	15256.409	22947.695	20970.578	19928.873	21131.535	17292.057	18651.006	12831.557
"1554511_at"	121.89076	69.74864	221.78252	76.63391	112.60135	81.667564	174.5059	79.41414	140.01062	705.3742
"1554512_a_at"	177.39629	27.25191	104.157875	365.75723	301.275	457.66492	106.4013	359.04977	236.6211	61.997505
"1554513_s_at"	260.68314	283.1755	498.90918	291.96576	537.11487	634.2334	381.31686	1321.1182	1201.8588	567.98755
"1554514_at"	136.88374	215.66144	397.71844	717.14984	99.41621	158.04887	89.63444	339.04446	257.26755	307.52493
"1554516_at"	2899.268	878.3869	2930.1643	2636.4255	4717.1553	3341.2358	3193.707	842.6742	465.27188	2066.5515
"1554517_x_at"	2958.2578	978.0797	3612.879	2502.0356	4555.242	2724.3093	2978.128	287.85577	277.94867	1767.1072
"1554518_at"	1134.9558	810.38763	948.4478	1415.9117	2028.9885	1878.8851	1420.9703	1440.4296	1622.8243	435.46667
"1554519_at"	171.28395	475.1988	778.3689	519.95074	974.10406	851.55707	498.09326	186.29546	466.75558	107.48964
"1554520_at"	1565.2998	1778.7975	609.0738	1287.5082	1466.4697	759.741	774.3429	387.78738	324.58987	895.2194
"1554522_at"	491.02448	186.34384	399.61246	405.01407	305.5628	633.37726	211.81038	574.3209	431.2477	541.29987
"1554523_a_at"	1800.809	1119.3967	1140.2383	941.38635	2134.7104	1141.5004	1601.886	1539.5842	1960.1921	1153.3417
"1554524_a_at"	177.14427	284.56454	302.64197	30.690062	113.05829	316.23853	194.98616	44.240963	12.511926	88.90243
"1554526_at"	184.2152	81.45579	755.06525	193.85278	233.3897	250.17885	69.41566	19.729458	195.38586	5.201741
"1554528_at"	1204.4344	5586.14	2458.9734	1826.3456	3140.2854	1566.0524	1381.6344	36.045155	125.610016	4827.835
"1554530_at"	89.18	29.852386	43.45553	60.533684	108.781044	69.35535	83.8577	41.25648	27.27462	62.43624
"1554531_at"	1588.5964	80.87858	1281.0011	1135.6594	2282.783	1197.1027	1029.8096	161.91371	115.38851	1514.7207
"1554533_at"	596.57367	351.18002	518.9521	257.7874	152.8439	532.991	340.8534	254.1515	338.48743	341.8109
"1554534_at"	743.72107	292.37277	718.88806	432.69327	1054.9296	717.1729	835.7726	539.3495	464.8192	770.93713
"1554536_at"	15.051862	19.296589	37.13624	307.3243	175.30348	50.751144	292.84552	27.064428	30.616484	10.067093
"1554537_at"	455.85687	800.73553	250.06905	557.5767	858.7286	666.65906	1562.3961	495.54254	449.48993	830.07996
"1554538_at"	1106.7288	771.8682	500.6704	719.9378	1225.6583	614.9711	310.02795	462.77603	774.5032	933.177
"1554539_a_at"	109.9416	180.1633	285.23996	388.3664	962.3764	477.70465	394.18472	279.17368	493.71667	75.28834
"1554540_at"	83.17349	49.33045	421.6297	26.898262	25.157679	149.47865	25.985605	63.45524	112.496994	247.92284
"1554541_a_at"	2791.5015	288.21667	1181.8491	2101.9336	2109.7454	1382.8698	1379.7169	82.017815	45.500652	46.3406
"1554542_at"	421.48138	720.4066	806.27606	393.9896	587.5952	203.51443	999.31976	716.99365	1215.701	546.14954
"1554543_at"	1373.7344	783.1166	1837.2614	991.1372	1710.2539	1498.974	1273.4232	651.54144	987.64716	1432.0145
"1554544_a_at"	7195.0244	3694.126	4735.145	4885.2603	3368.0925	8537.804	2894.4026	2453.4753	2707.5142	1104.6493
"1554545_at"	1041.3069	1653.4062	597.1053	737.5423	1222.1821	957.0287	1223.9713	439.7498	526.8462	1129.7845
"1554547_at"	6355.625	5528.228	8851.577	5195.1187	3027.366	5047.99	5208.106	526.0572	820.2064	12414.012
"1554549_a_at"	566.1822	1165.6055	651.08295	691.4638	813.50726	659.42487	614.8687	497.33862	781.6831	791.0594
"1554550_at"	27.402283	43.842896	49.465496	37.900085	53.20308	146.96123	265.99564	99.7003	32.657387	24.37293
"1554553_s_at"	3277.5437	4858.5166	2913.7869	2995.8567	3266.5337	2863.1257	2898.9246	5502.6836	5146.949	3804.5535
"1554554_at"	206.7338	147.31853	365.1766	596.24225	82.00715	202.78404	256.5747	156.94801	366.11407	102.58476
"1554555_a_at"	3492.9817	4085.7063	2371.5215	2278.7488	2417.9697	2259.3687	2200.321	991.7684	989.6234	1847.6488
"1554556_a_at"	826.5404	811.93994	259.3879	479.3476	260.35922	714.5122	233.58655	1460.1028	1279.7155	2048.111
"1554557_at"	122.402824	947.56683	384.47183	529.3668	481.62244	527.80725	393.0181	1195.3137	625.50507	827.1757
"1554558_at"	289.6847	180.02155	442.95703	21.934908	176.5451	330.152	391.68396	246.06625	499.6635	358.23328
"1554559_at"	384.09265	511.8431	166.64908	2718.6143	1279.116	250.8024	1028.4265	151.04254	962.8488	176.2833
"1554560_at"	148.42227	51.424934	407.545	70.75479	394.4466	129.23077	440.48404	109.84761	107.94678	259.79044
"1554564_a_at"	112.53972	40.841805	177.88365	82.201454	186.4996	166.41501	123.654816	134.60234	94.95695	515.7011
"1554565_x_at"	211.66306	115.78627	418.6447	162.53714	379.8571	176.52242	201.53316	398.86816	139.50612	1438.505
"1554566_at"	894.1665	719.91724	1087.154	832.0096	1703.5415	1368.1187	1091.9379	405.39438	1128.9086	328.17883
"1554568_at"	327.53473	295.21957	425.32	420.83997	218.05641	191.08942	189.14525	245.94048	211.38338	182.21552
"1554569_a_at"	802.6363	695.26794	982.8251	1048.4636	877.2866	1152.7465	1123.7656	448.36902	886.8144	438.9717
"1554571_at"	247.1434	444.197	598.13007	334.85675	215.01276	433.07675	449.42902	178.69131	501.1113	208.51067
"1554572_a_at"	2013.1227	1049.0614	1807.6351	1383.9926	1888.5049	1398.695	1572.5759	9493.866	7871.452	1560.5664
"1554574_a_at"	18215.408	18658.684	20716.629	19724.26	17894.809	24484.645	23304.85	21464.098	24531.576	10812.121
"1554575_a_at"	1292.9966	1407.5565	1005.9624	1809.3788	2081.1985	2238.2664	1055.0721	747.4163	1195.4705	1240.4886
"1554576_a_at"	240.36385	137.43562	184.14581	937.37555	218.51924	274.25125	230.17754	3613.0828	4613.5806	220.09052
"1554577_a_at"	12481.275	14631.04	11412.728	14772.375	14539.874	15348.725	13207.506	10207.823	9573.245	8496.816
"1554578_at"	676.7277	145.34685	127.03329	141.29901	621.0601	728.6088	455.84036	329.43265	536.2152	344.96072
"1554579_a_at"	452.1169	390.23245	342.45926	327.02127	506.85345	614.5801	1014.36615	56.287643	251.28307	213.41798
"1554580_a_at"	121.297066	61.56352	171.31453	284.17273	268.19553	106.19361	140.3598	407.14957	733.99744	415.10486
"1554582_a_at"	783.77	1034.2463	1016.9398	1030.7015	1192.8469	1176.1432	1411.8654	312.8262	138.49583	502.13217
"1554583_a_at"	228.75432	58.406773	850.30237	148.75227	944.80035	615.0484	658.67596	126.77226	42.77043	387.35532
"1554584_at"	341.61566	323.00644	551.4721	402.5652	847.1629	70.90331	886.29694	324.96133	374.72913	223.47464
"1554586_a_at"	663.9038	1187.6656	144.08144	2084.176	146.50429	989.01263	1341.4695	749.3809	2011.167	2857.5496
"1554588_a_at"	950.0365	1890.088	1142.6395	1483.5574	1532.8767	860.38934	1370.5399	947.4904	400.55368	970.03925
"1554589_at"	249.39946	207.44875	266.19806	595.44507	304.0006	364.10614	59.16677	787.0275	771.0603	280.84854
"1554591_at"	1991.5499	765.51984	1803.0477	1145.7534	2101.4707	892.50806	1478.7838	778.6902	1112.6459	1024.4106
"1554592_a_at"	482.65146	608.594	279.42615	67.68504	60.518375	470.5072	154.85957	52.14396	83.828606	346.09683
"1554593_s_at"	668.72	717.6854	307.59232	39.12867	588.60443	1169.6564	46.034714	41.082977	101.72019	173.08145
"1554594_at"	86.792015	238.30096	46.190094	217.21513	34.88879	263.30225	17.224031	190.72531	236.6003	292.31
"1554595_at"	2987.294	1951.8949	2801.4731	1725.1475	2706.318	1812.5272	2447.234	1577.8695	2565.105	3713.4377
"1554597_at"	2051.2188	2367.4275	2004.5438	1498.633	2218.7468	1995.3314	1337.8124	2906.6475	3334.8787	3978.6814
"1554599_x_at"	2751.5928	2952.8464	2441.4172	2100.1877	3393.5664	3359.839	1775.6829	4070.205	4111.7866	3396.3315
"1554600_s_at"	6870.086	4452.5264	7598.843	4239.171	6494.2676	8338.26	4808.9863	35255.375	39284.168	2348.0774
"1554601_at"	365.20105	241.5919	247.06624	327.29233	510.05753	448.1547	145.45813	210.48988	82.015785	455.08804
"1554602_at"	482.31863	742.273	647.1365	1006.93567	870.9415	666.92377	782.50305	679.95374	997.27203	842.09393
"1554604_at"	459.5941	314.7181	317.47577	493.77817	118.45174	125.22553	263.147	35.74719	108.114105	316.06107
"1554606_at"	3029.01	3282.977	1683.0078	2516.3723	2932.412	2160.5474	1589.4552	1657.7001	1509.3724	680.6073
"1554607_at"	475.03946	367.3077	104.51702	337.9237	158.34795	342.12915	104.849525	210.44174	403.17642	761.9372
"1554608_at"	410.71698	480.45816	229.81386	246.87863	144.68274	82.78023	387.12048	361.58066	244.45943	843.92896
"1554609_at"	2269.2568	1531.6603	2396.5044	3380.1238	1821.6038	2150.524	2528.1013	445.32275	417.1771	2374.0166
"1554610_at"	169.69888	116.64054	238.54016	623.2455	294.9919	330.8849	125.24595	190.15833	381.93103	64.24917
"1554612_at"	34.399418	68.91794	532.99255	343.3699	132.46373	86.489	144.35645	283.89325	222.59357	67.47892
"1554613_a_at"	361.4875	571.99347	422.5499	277.4339	258.31738	304.41864	513.9032	438.05704	428.71518	227.86998
"1554614_a_at"	481.74652	477.88235	1123.535	879.4729	1524.2622	1060.4631	91.64383	842.86835	828.4336	423.67
"1554615_at"	46.292946	43.659985	43.37954	149.65335	127.716576	53.119915	86.157936	43.81694	40.70436	113.79042
"1554616_at"	1346.9053	917.40643	2082.143	1631.4877	3071.2683	1250.6562	2611.4783	717.0157	1298.2513	1363.5292
"1554618_at"	1018.09155	762.33167	1519.615	698.85846	1458.172	1531.5786	828.4936	212.34393	470.34644	782.8946
"1554619_at"	80.960205	274.34253	112.28448	153.42052	111.00714	179.3212	146.24666	136.33694	114.50447	9.893938
"1554621_at"	468.242	380.5435	225.94354	970.72766	304.39117	740.33875	531.5091	691.2556	507.60602	625.9399
"1554623_x_at"	387.84613	400.61862	391.5585	116.43202	689.9104	432.3738	392.5341	280.80286	305.49893	711.0407
"1554624_a_at"	512.0019	212.3007	211.86977	62.0473	468.13977	387.38495	388.90674	29.271635	742.8485	125.58179
"1554625_at"	1266.3713	1166.5952	1687.054	1425.0677	1520.6682	1078.1306	1386.4926	799.7599	747.2875	957.8802
"1554627_a_at"	4422.383	4363.6323	6967.318	3983.6897	6421.225	6003.396	6108.202	8177.3057	7491.595	2577.815
"1554628_at"	616.6768	3146.8074	953.34686	1081.7252	1135.8435	905.93	886.5946	1217.6677	1306.3625	815.3058
"1554629_at"	1054.7366	346.53806	597.2046	598.1773	333.70935	585.54034	636.80676	155.47418	69.0511	628.21436
"1554631_at"	405.35464	344.1987	380.7085	485.066	630.7436	526.8903	544.68524	488.21094	610.46704	346.27567
"1554633_a_at"	1876.0182	2743.786	2297.0457	1123.3196	2965.069	1878.515	992.3279	23.96176	314.21625	969.62964
"1554634_at"	420.76138	354.7652	407.49844	468.75983	585.7761	268.63116	1015.63055	225.69186	89.71373	185.28926
"1554635_a_at"	79.29064	219.25713	113.323845	149.21342	75.141754	282.08154	284.3752	67.78076	95.0484	100.086
"1554636_at"	1591.761	265.03424	1101.8898	844.72186	1092.7487	1226.5992	638.8588	248.50621	160.92209	2322.0823
"1554637_a_at"	1095.482	1016.51886	1570.3336	968.5221	1729.5992	1402.0	1114.3425	1015.06256	877.9813	1454.414
"1554638_at"	773.9774	507.83176	797.8791	77.21628	1223.0781	886.652	537.5411	615.2114	562.1635	1134.5966
"1554640_at"	685.5708	592.62085	319.47003	862.35254	1156.0137	480.40967	522.855	633.1888	1165.556	265.43213
"1554641_a_at"	252.70613	51.58828	94.87636	123.342804	486.2211	54.636723	162.25761	75.35163	68.44646	389.21643
"1554642_at"	948.0519	812.6396	1053.0734	1306.9325	1553.9307	1134.7612	1001.89636	417.9672	878.8761	936.64307
"1554643_at"	549.86346	387.11798	683.6	99.954926	832.15344	473.1835	458.97055	23.660566	21.410763	149.09802
"1554646_at"	576.07056	442.28006	487.31927	690.9336	708.31335	374.23492	483.954	405.39267	842.78516	740.8819
"1554648_a_at"	467.43735	112.6504	276.18536	130.896	617.5029	127.06018	645.7788	254.16249	421.83392	350.09473
"1554649_at"	314.69684	365.6172	469.46658	486.22974	618.7058	465.5566	627.52814	329.01718	486.45694	781.659
"1554650_a_at"	193.1324	105.19703	70.98593	168.09303	152.90001	150.8753	187.63713	360.80804	184.68333	250.20761
"1554652_s_at"	725.6443	74.988556	113.64817	148.56458	146.71182	468.09488	124.05773	259.4944	60.6507	459.62662
"1554655_a_at"	101.15921	93.79807	88.10952	119.79423	92.94995	114.06817	410.74023	38.23718	86.00615	53.874004
"1554657_a_at"	100.811676	781.46075	153.17188	124.384865	104.144875	199.8631	92.18764	192.43741	462.05975	788.3996
"1554659_at"	435.76575	449.1508	634.75745	451.01392	686.94244	576.0786	392.44238	500.11746	688.8106	649.0908
"1554660_a_at"	157.13504	638.2281	100.10239	558.14075	308.1642	724.9901	246.71461	425.09946	467.59387	833.21234
"1554661_s_at"	1582.8448	1596.6859	1713.2224	1316.8271	1948.5887	1941.1917	1612.4121	1471.218	1355.8495	1874.4822
"1554662_at"	130.62234	49.95466	174.2582	70.821754	84.32337	162.43591	117.0746	52.604805	96.88976	90.41646
"1554663_a_at"	390.76337	42.47461	286.4291	29.364859	140.94775	411.43726	390.24005	19.575193	155.69237	95.35615
"1554664_at"	100.64752	232.28702	421.9382	29.93141	238.6235	193.07545	102.571815	99.76184	415.77182	305.50055
"1554665_at"	469.48904	134.03725	546.91113	301.20364	145.87074	52.869606	195.93983	58.061287	19.007545	331.2728
"1554666_at"	783.1009	640.58954	1002.85876	809.0523	654.8503	946.23755	784.7655	426.42957	110.21491	496.72702
"1554667_s_at"	1538.7097	2849.526	1850.5668	1655.7968	2341.222	1781.0875	1981.1364	3350.9907	2368.9692	1787.6609
"1554668_a_at"	49.59795	314.7905	181.01027	100.49847	319.1379	135.17056	116.633705	64.96965	284.82965	46.727245
"1554670_at"	609.7812	849.247	627.5686	485.34134	722.86664	427.81085	516.06586	512.757	463.44946	1111.7819
"1554671_a_at"	2247.2622	1773.7498	2536.5347	1611.7465	4545.7505	2470.7668	2616.4375	828.79553	1063.8245	655.4857
"1554672_at"	469.1552	381.007	332.2527	440.60397	800.2921	549.9813	580.53754	435.30566	394.38388	394.84982
"1554675_a_at"	464.56973	594.65137	665.1309	356.96674	395.31946	735.2529	174.6545	259.98816	517.6409	62.567673
"1554676_at"	32.46489	293.60037	90.26739	321.04742	225.23804	544.88165	64.906624	256.6499	323.45236	311.6943
"1554677_s_at"	199.36765	1001.03156	864.68384	992.0628	2041.7871	672.35425	716.9208	452.07367	200.9511	773.97687
"1554678_s_at"	8851.898	8687.882	11161.336	13202.835	11026.315	10067.364	8583.794	15989.922	11962.063	12539.176
"1554679_a_at"	13114.3125	4148.3403	3502.9536	6084.6865	5333.6216	6165.9023	9405.538	28238.195	29870.166	8244.762
"1554680_s_at"	1045.9514	723.70984	697.26355	489.67252	689.3721	958.11554	1143.4395	77.94853	566.03766	577.5599
"1554681_a_at"	69.16417	91.503296	161.34003	63.337654	257.66077	181.05603	82.42882	49.925896	65.277245	36.721508
"1554683_a_at"	461.2289	1001.57697	116.546936	1059.9203	941.5719	456.91858	950.2558	636.8767	482.23898	244.48833
"1554685_a_at"	532.697	63.366837	438.42627	69.28817	194.95609	313.7187	117.93876	153.74724	4531.228	105.08677
"1554686_at"	356.56052	438.2913	567.2758	365.45874	491.991	392.1557	340.151	273.27286	161.09222	354.75293
"1554689_a_at"	510.22205	595.87854	1310.5876	1017.8497	1417.6454	1073.9762	1170.8647	1378.8331	1087.9352	1697.4581
"1554690_a_at"	1870.1869	1850.0264	1182.6964	1067.5778	1399.7924	1512.6093	1723.4653	3387.2188	2518.9282	1902.3169
"1554691_a_at"	3388.5188	6004.153	3132.0933	5005.1694	6376.182	4474.0713	4708.9814	5672.3184	7797.277	1590.7463
"1554692_at"	590.0313	400.31393	677.2907	83.75775	330.62375	569.6411	919.6639	367.22314	738.53485	611.32086
"1554694_at"	52.511963	36.43647	102.81286	96.60249	67.14111	109.93945	28.22063	38.431026	57.307793	46.362995
"1554696_s_at"	1340.5776	2338.9272	89.29557	403.3727	4731.5347	734.4857	1271.9531	37903.164	34761.047	1296.697
"1554697_at"	694.4348	71.567024	344.9803	58.051357	266.60907	152.09543	77.98451	79.29261	122.891785	31.78963
"1554699_at"	749.8738	338.6437	762.7419	560.12036	247.44054	903.81885	628.741	57.026764	175.3733	688.2084
"1554700_at"	143.24963	13.382141	37.143818	133.24246	21.424067	20.18115	150.0703	19.029053	209.41699	56.000668
"1554701_a_at"	702.80835	528.0739	375.13025	586.87445	1405.3549	706.3622	1545.5814	660.6427	551.91705	547.3688
"1554702_at"	445.7693	396.31577	887.9095	753.7265	836.41876	762.56824	831.0054	202.08714	195.12175	622.73004
"1554703_at"	283.7339	1336.7242	78.10953	76.55635	128.57268	278.0509	378.72253	2048.654	2369.8728	1677.4248
"1554704_at"	30.038391	246.11432	458.68723	200.4426	512.72034	49.82637	152.33614	728.8175	770.9107	35.975925
"1554705_at"	38.851	62.63116	196.69911	76.85397	136.22984	105.906364	109.78123	219.60915	60.390656	36.87147
"1554706_at"	666.3865	178.8243	35.505516	1405.2812	1052.156	121.23744	426.38818	128.8093	133.33833	165.08087
"1554707_at"	643.55853	557.9274	875.6634	616.5867	704.83716	819.9099	419.21146	567.2032	907.6806	509.02557
"1554708_s_at"	1680.6602	1510.877	962.314	1854.9591	1498.2266	1315.4283	1199.3759	254.42549	456.176	1387.0465
"1554710_at"	108.646935	51.469833	269.01346	60.258617	66.59873	352.1425	72.93304	107.600204	59.599487	286.63748
"1554711_at"	541.9612	159.41354	199.32117	89.66584	96.84403	88.980286	171.8124	226.6317	204.40396	91.670265
"1554712_a_at"	392.23825	97.804375	621.2436	384.61694	1351.663	391.62906	851.9442	623.765	615.9812	436.05603
"1554714_at"	41.046005	26.846558	42.599846	36.506878	59.562054	34.28014	44.985397	22.086987	37.536026	69.01818
"1554715_at"	138.81567	59.167706	111.099365	116.69419	97.78649	108.06532	48.458656	65.98883	99.49982	71.04618
"1554716_s_at"	109.1437	95.1699	496.99442	78.982544	179.2001	358.36017	177.21344	116.922745	79.04123	417.4529
"1554717_a_at"	631.74915	609.1377	1073.3009	446.52338	1590.9744	404.0299	1208.7687	120.43575	472.30365	17.607712
"1554719_at"	49.457104	347.02612	456.7058	72.28091	311.57825	321.4877	355.65155	319.9279	320.568	68.10995
"1554721_a_at"	4246.4365	2878.624	4766.394	3086.4905	3678.9548	3881.153	4233.5703	5386.791	4213.3896	4029.9797
"1554722_at"	28.898756	27.592337	56.975903	59.894707	45.728832	35.823944	260.2586	24.740435	40.08796	151.61438
"1554723_x_at"	22.481384	33.288013	52.91713	14.082716	49.08682	11.089726	92.435036	11.6693735	73.69584	95.75042
"1554724_at"	299.0263	41.93389	67.57917	77.36377	47.869946	143.2589	127.349556	145.50017	168.56676	184.80998
"1554725_at"	66.53265	40.032845	218.96326	17.407003	86.82352	121.46607	450.68466	11.85884	33.645023	19.54852
"1554726_at"	722.71625	1079.055	778.34863	729.94525	948.16675	1048.4204	930.46625	786.1244	757.32764	805.1589
"1554728_at"	55.885975	36.102566	67.077126	43.211105	99.6563	81.04197	65.2373	160.00703	629.99414	177.3794
"1554730_at"	1300.3113	591.7483	572.1976	593.89136	1726.3353	333.4926	953.17114	853.39795	805.8725	871.3131
"1554732_at"	120.89722	247.42343	961.8475	307.72693	1202.6095	177.48102	232.94023	19.667856	28.025352	277.86978
"1554733_at"	291.0376	29.598291	69.51158	202.06532	55.601685	351.38248	59.090385	38.715218	164.34155	36.587193
"1554735_a_at"	84.73838	245.80666	120.56403	81.14335	84.681526	125.89287	182.44774	88.67454	63.862312	649.2754
"1554736_at"	277.4243	19.460478	78.970146	298.8344	83.59243	91.13668	121.27397	70.99188	42.48364	42.361824
"1554737_at"	405.50497	106.821144	639.641	294.7227	722.77795	207.4454	478.06985	361.07562	90.12802	82.427925
"1554739_at"	38.503147	218.89157	291.86838	109.66427	68.474525	170.41313	217.84978	198.27132	46.111954	12.204775
"1554740_a_at"	3498.8813	2869.7666	3040.5532	4853.1855	3629.4402	5015.5103	3747.4275	2714.517	2525.202	1801.7959
"1554741_s_at"	2518.3376	1468.4991	2692.9194	2262.622	817.79565	2255.9292	3002.588	237.68156	416.736	4014.8955
"1554742_at"	369.3521	130.73024	386.72827	70.933846	348.9053	458.6785	390.20648	260.3803	271.3104	318.01416
"1554743_x_at"	544.6857	302.90588	751.965	880.27026	827.9114	696.83545	601.3472	330.31665	412.42612	99.20607
"1554744_at"	385.99667	483.23117	111.60405	42.546223	599.9324	718.74384	391.5559	34.336517	624.6937	333.06177
"1554745_at"	387.30145	292.91403	182.49934	512.72656	131.67677	534.12836	125.51898	77.806015	897.07874	331.4639
"1554747_a_at"	10771.356	11936.152	10396.146	11186.123	15692.856	18778.104	10565.286	18920.625	17214.305	4199.1123
"1554748_at"	5717.729	1019.4616	12217.495	14466.492	12907.131	9442.212	6941.446	259.80453	606.29083	386.68607
"1554749_s_at"	1035.6472	381.505	1406.5287	2828.6606	1964.9573	2134.784	747.13043	647.1321	1074.543	367.17896
"1554751_at"	35.393333	123.57628	79.89034	69.08781	52.35645	22.642103	153.82516	31.931528	120.059494	29.311495
"1554752_a_at"	113.39606	66.71908	158.0596	104.40329	234.12013	113.83198	146.77467	51.67717	112.649376	95.38269
"1554755_a_at"	636.70233	2252.4785	1093.1735	561.5731	1211.7596	266.35867	1144.5616	335.19824	48.064896	5010.8916
"1554757_a_at"	2226.1812	1243.4385	1355.1497	1624.3788	1422.6189	1828.3304	1648.4661	2910.7947	3949.928	1689.2572
"1554758_a_at"	658.78516	882.7082	1134.1249	703.16547	1464.7952	963.54865	740.2676	476.22144	682.29486	118.83992
"1554759_at"	72.731705	104.387665	99.53157	199.88951	467.40692	247.50107	334.7665	81.326096	80.1393	339.24545
"1554761_a_at"	1314.3109	1819.7986	1078.4108	906.5464	1359.0566	1318.378	1521.2317	3651.893	3933.922	917.7811
"1554762_a_at"	1365.4062	1071.2941	686.3732	849.8677	182.9741	935.8009	907.91797	5415.285	6258.9614	486.34125
"1554763_at"	68.904076	37.666786	243.14293	64.08449	228.18785	58.743893	433.61542	100.02194	81.018105	70.67402
"1554764_a_at"	206.11821	20.434057	10.997376	10.365134	28.694983	165.0163	10.680646	8.555448	244.11598	8.060675
"1554765_a_at"	241.2711	53.9523	87.04957	70.320015	499.86423	62.704567	521.87103	31.99534	141.64136	54.711056
"1554766_s_at"	211.3566	540.8186	766.20013	617.52875	541.845	695.2978	435.1115	348.63644	398.19	429.69867
"1554767_s_at"	2680.3923	1995.1918	1824.9784	3038.9658	2702.0251	2242.9185	2868.8035	2348.8008	1805.6438	1550.4464
"1554768_a_at"	2176.2139	1250.9268	2021.7451	1820.3408	2838.9084	2091.9766	2457.174	20601.947	17072.469	1215.8418
"1554769_at"	279.56827	598.7839	400.82428	834.4587	624.13794	780.694	826.6634	383.38644	362.40076	596.3723
"1554770_x_at"	720.98645	787.34467	675.17474	786.1	802.1805	1046.9799	245.96938	604.22485	567.915	452.51196
"1554771_at"	668.79755	597.7183	62.494766	731.5125	211.61345	346.97217	56.16145	415.676	44.197773	1229.474
"1554772_at"	527.73047	327.62186	632.36816	397.39478	477.65225	227.0711	603.88513	314.19824	429.09726	529.73035
"1554773_at"	66.31234	49.101364	134.09137	80.08904	60.081852	52.397568	80.379776	37.196804	112.26329	50.450027
"1554774_at"	1209.5347	878.0325	1067.9314	1642.2767	1253.7675	460.5135	866.99866	721.08344	581.3496	720.32025
"1554776_at"	78.139854	169.21837	82.54018	66.245705	92.732796	56.274475	61.854305	23.437744	339.37918	32.611393
"1554777_at"	143.48903	253.92247	561.3786	167.78206	162.42079	171.67226	445.7593	357.95584	240.38678	171.46716
"1554778_at"	297.11188	128.87807	35.405228	200.48352	4.8918543	222.55461	63.950104	167.96701	199.53792	185.92381
"1554779_s_at"	122.486565	39.773285	386.13553	185.11781	288.5741	236.75354	217.65955	147.02882	184.01657	154.99213
"1554780_a_at"	1204.9476	1044.5638	1102.9132	980.3081	1118.3604	871.5869	1607.6425	1798.8225	2718.7996	1620.9688
"1554781_at"	55.840614	407.97058	373.33044	457.409	397.017	314.06717	659.3259	97.85474	182.81816	292.76782
"1554782_at"	116.16887	66.97843	890.4428	242.11292	587.9659	78.78575	311.9541	149.16878	261.70654	288.44202
"1554783_s_at"	200.24638	19.001457	290.06616	423.08453	38.8128	762.22955	541.4286	1169.7367	1127.2397	40.391216
"1554784_at"	2375.546	856.7435	2299.9675	1593.7008	1965.0072	2131.4963	1931.6063	330.3125	357.89972	2722.7534
"1554785_at"	212.01276	186.2716	545.80634	304.87607	325.768	696.89905	292.37656	335.09332	265.83267	20.639341
"1554786_at"	501.81085	303.6889	474.36685	319.35074	769.1717	230.12006	379.90894	166.65617	113.82916	378.9476
"1554787_at"	172.59883	90.43004	53.124393	162.3537	366.5462	125.82292	47.32301	33.24546	42.485332	37.14288
"1554789_a_at"	9297.631	2433.7483	8608.398	10404.78	5579.3	12494.146	10469.608	152.53976	100.29662	4353.698
"1554790_at"	584.41675	370.89493	728.34174	243.92924	1025.6298	625.1436	143.58112	535.3481	536.48926	536.85956
"1554791_a_at"	354.21387	1782.0829	2188.2744	1281.0933	2360.3728	2528.48	1683.99	245.05443	230.13028	506.12164
"1554793_at"	166.59944	40.50435	139.14525	161.31133	96.52444	138.59164	177.0386	179.2413	117.45303	134.45334
"1554794_a_at"	1086.7875	1115.0692	666.1458	678.9481	783.5269	1427.7137	874.70337	2097.9814	2328.8994	603.13245
"1554795_a_at"	193.85664	332.72635	253.7099	182.31473	717.03687	200.73346	366.6986	2064.5164	1800.3485	106.90787
"1554796_at"	712.41876	407.10083	249.69688	464.06912	268.84518	516.52527	429.1479	105.89833	368.07123	489.84552
"1554797_at"	128.67558	479.4152	474.9652	479.6265	460.2163	379.92273	395.56152	172.83716	211.50839	5441.372
"1554798_at"	148.1018	358.05487	97.13788	126.94189	157.40674	174.02203	188.54916	287.25842	817.3036	140.79523
"1554800_at"	1201.4358	624.2832	755.50183	918.8875	848.8805	1366.3851	628.2487	610.6458	734.3184	502.35562
"1554801_at"	2388.6682	17637.656	468.31958	9417.414	160.25098	667.3376	747.5964	435.41068	275.8933	45151.65
"1554803_s_at"	143.73306	175.12953	144.88226	169.09357	249.46576	170.94714	169.00742	92.349106	86.70371	558.13354
"1554804_a_at"	986.22906	1057.8303	1066.9985	789.2762	2609.056	1251.2557	2937.1895	1523.3427	1325.0536	905.597
"1554805_at"	700.38116	412.02466	238.38159	190.98613	633.53955	1085.4741	960.0464	657.5739	463.74426	427.80853
"1554806_a_at"	9581.867	3037.8948	9316.617	7329.3647	8825.176	8760.328	9718.783	2987.7808	3345.3887	3776.8894
"1554807_a_at"	3796.9358	1888.1212	2686.7158	4637.057	5477.8184	3916.206	3723.954	3651.297	3147.225	2521.5266
"1554808_at"	562.0949	215.99222	243.17688	21.170984	299.49332	164.81865	82.09699	334.67972	250.4491	508.7104
"1554809_at"	1483.5319	1363.3551	1822.5876	1262.6975	983.6444	1150.7001	1891.9128	538.5013	472.34503	1059.3374
"1554810_at"	352.3745	246.98793	132.56744	145.03334	419.06433	58.178932	349.02158	411.041	442.3474	565.4603
"1554812_at"	497.3559	408.75192	998.6049	527.3646	689.3839	752.47974	651.04315	586.1738	636.2509	751.50085
"1554813_at"	458.8869	334.51944	348.24988	371.816	466.50143	449.47717	351.847	184.87381	73.49862	155.61188
"1554814_at"	157.1692	80.40348	103.56236	84.755165	75.657524	94.53042	69.64566	103.209435	86.322845	50.126217
"1554816_at"	74.02399	27.056387	123.82579	61.474865	488.51688	66.49885	171.50714	103.30513	37.693283	245.92403
"1554818_s_at"	525.01904	1295.6521	678.25446	1208.1793	327.72522	594.6973	774.1241	609.917	371.65704	793.3927
"1554819_a_at"	146.1586	117.92008	297.98996	199.88441	235.61385	159.04584	142.04675	405.88657	1488.2855	120.27499
"1554820_at"	206.80693	235.94995	498.08337	323.65118	29.364748	94.487	330.1819	235.4089	382.34552	144.5315
"1554821_a_at"	1828.7473	1287.0059	1404.7697	1272.3508	1224.6086	2148.2124	1377.5215	2256.3882	2045.893	760.7787
"1554822_at"	384.2552	267.71225	403.46075	330.71155	173.32634	215.11313	99.660255	410.5522	378.20593	256.80392
"1554824_at"	1120.8707	599.68915	830.1472	551.09436	933.2071	696.4779	403.59644	315.58206	468.90134	1194.079
"1554825_at"	370.7213	338.2589	182.03519	53.15422	54.84061	92.21971	665.9878	250.3936	274.47876	409.08658
"1554826_at"	237.99911	368.05374	162.14995	264.56165	260.07056	1034.7804	1070.708	503.39728	688.10706	449.78696
"1554827_a_at"	77.00882	68.50872	61.108593	51.180424	69.17813	155.92589	86.20278	338.66794	135.5872	79.70488
"1554828_at"	337.61447	241.93767	72.023026	53.511364	48.09681	111.35036	57.823254	63.589073	209.7564	80.711975
"1554830_a_at"	2177.3083	500.62912	1260.5773	1952.6307	4082.275	1975.5215	1918.6958	915.47437	790.8075	888.96185
"1554831_x_at"	591.843	535.94403	866.7489	1057.3352	472.14276	877.7921	898.66644	326.89297	365.9265	556.4027
"1554833_at"	773.08307	174.2919	173.3242	492.53107	185.5285	432.2222	567.30884	613.1937	1193.7059	651.6849
"1554834_a_at"	2833.0657	2402.941	2048.4023	1966.695	2529.524	2277.9702	2889.7551	661.4432	789.22015	1745.3353
"1554835_a_at"	114.955826	519.5695	36.665447	49.343433	144.04991	153.57324	311.63007	1773.9656	2015.1014	71.17537
"1554836_at"	145.0466	35.446774	30.292496	29.246027	63.65571	73.10195	28.52115	23.99164	23.801573	275.37723
"1554837_a_at"	213.7781	98.14123	79.46688	155.45232	114.036095	466.86917	326.4391	108.67199	443.26535	424.36163
"1554839_at"	891.63495	503.64886	890.7313	1007.63385	874.6661	906.77155	962.086	850.7873	1341.5764	693.3729
"1554840_at"	835.2713	899.084	1310.8689	1061.1874	1523.3837	1127.9475	1012.80194	582.5297	861.55835	1122.9846
"1554841_at"	426.42026	329.4573	630.50574	830.765	430.07867	255.89857	289.2503	503.19815	532.9306	292.21646
"1554842_at"	1339.0436	1207.3705	1269.7051	1517.6528	1974.8569	1161.2098	1764.4746	431.73813	1768.2004	1139.229
"1554844_at"	252.42001	271.8827	311.81607	363.30417	367.41187	315.69083	359.18478	323.72992	464.3122	318.48553
"1554846_at"	735.7518	159.88763	316.77634	392.44052	341.59674	479.33908	440.89215	53.65029	34.458176	354.11575
"1554847_at"	461.21426	133.65071	137.66118	292.0618	478.04614	333.54608	276.4328	197.16454	74.575356	125.60127
"1554849_at"	48.970226	23.6718	71.25813	52.592472	205.30632	67.82761	521.6222	168.0041	40.51093	83.80046
"1554850_at"	526.8665	248.88356	293.5623	554.2428	639.71246	579.7514	305.9941	129.45287	470.01978	490.96994
"1554852_a_at"	999.0313	1284.8633	730.45184	1118.3251	1133.4935	971.87054	1186.3021	246.4362	672.35376	1033.9795
"1554853_at"	37.81718	110.36894	311.76422	70.545555	119.066795	546.43756	99.86437	345.2014	221.99982	213.10703
"1554855_at"	59.988735	20.874136	84.14379	32.934776	102.01483	37.80111	53.981888	17.522617	57.63928	35.736557
"1554857_at"	752.09576	656.155	1155.4681	847.87964	834.46155	546.39856	1098.1736	513.0706	605.9837	383.69208
"1554860_at"	443.9593	389.09857	824.1586	155.16283	634.03076	616.73944	685.4557	264.3166	446.63617	492.82367
"1554862_at"	69.10683	145.46982	68.15954	161.18268	81.13307	105.01461	78.93168	55.574722	59.28686	63.26851
"1554863_s_at"	114.22323	39.331306	92.25686	61.05978	91.19396	99.35856	249.80528	33.989162	123.13832	145.53792
"1554864_a_at"	768.78143	682.9689	854.7694	1550.7006	1205.2668	977.23755	879.2062	676.9042	943.4248	881.4162
"1554865_at"	250.02701	202.73296	42.12983	17.919813	37.04654	45.95137	25.420893	134.8008	329.56848	34.494453
"1554866_at"	353.95184	281.0006	211.85144	398.6826	658.8127	410.60748	672.28687	214.76534	565.5281	290.84094
"1554867_a_at"	341.37885	220.61531	313.21698	30.781204	49.61619	644.8321	225.4726	1548.8037	2239.8862	22.567818
"1554868_s_at"	23503.852	18665.072	20811.969	24624.117	24322.959	21674.299	24383.889	22946.488	19912.215	13734.011
"1554869_at"	755.807	662.0007	1396.1665	900.9528	1333.386	1187.2961	1038.741	484.36154	804.7455	868.9626
"1554871_at"	192.426	35.00472	39.018234	93.52216	204.39658	343.48175	270.73343	75.832085	272.81912	187.80568
"1554872_a_at"	1955.2089	736.762	1553.3882	1416.4996	1858.7251	1725.7795	1840.322	63.33013	217.03918	126.502205
"1554873_at"	393.26907	471.9253	347.2754	450.81616	712.1865	480.24963	47.41172	858.61456	707.56995	729.9252
"1554874_at"	335.3432	8.596252	166.3117	165.21759	496.36734	76.261765	621.0597	190.89738	276.95395	259.04327
"1554875_at"	39.082123	32.98682	40.923363	38.792927	87.383896	154.83586	54.928432	171.40446	34.92925	21.243736
"1554876_a_at"	34.92063	314.48517	100.3899	200.94626	562.8834	318.11108	273.62924	162.60059	92.8056	66.30793
"1554878_a_at"	1915.273	896.55334	1164.5925	2849.7722	3062.9456	1895.2944	1837.0962	4454.2505	4217.459	379.58368
"1554880_at"	136.69334	562.4808	712.0153	149.24814	757.0919	940.20514	849.5965	95.381325	877.76544	190.38971
"1554882_at"	104.219574	23.968014	76.865105	163.78572	39.360134	49.168373	45.419193	217.13196	222.65564	138.49306
"1554883_a_at"	1515.531	1835.627	1515.4575	1542.9841	1447.7075	1505.372	1358.0521	3038.6492	2533.3809	986.1945
"1554884_at"	13.06848	6.839314	20.968863	23.284325	23.258059	40.911236	39.909515	86.72483	36.575592	14.599948
"1554885_a_at"	295.16986	622.1297	311.43433	640.9471	454.84872	45.405403	48.107155	3127.563	2630.874	171.33492
"1554886_a_at"	181.51108	176.67036	744.4271	337.955	978.90625	614.8383	700.16876	337.20383	495.76117	86.484695
"1554887_at"	58.605194	105.66229	32.297646	30.263208	93.36395	20.322287	73.19102	22.231821	34.471764	20.359913
"1554889_at"	475.0512	160.31122	272.3434	339.02173	408.96042	304.22946	533.7175	117.18015	309.09842	329.6897
"1554890_a_at"	1676.9843	1925.2238	2220.0398	1452.8013	1986.343	2114.2896	1001.67487	3118.7578	2267.1667	1147.2699
"1554891_at"	99.24679	24.769537	82.685074	46.93051	68.17067	56.483673	82.52192	60.69697	86.69349	46.458965
"1554892_a_at"	166.92392	148.42415	424.88977	280.88168	521.5757	171.37274	508.10938	241.38148	118.219444	129.4479
"1554894_a_at"	1717.9644	2120.5396	2731.457	2021.5499	2380.2302	1854.1355	2139.7493	2108.636	1884.6998	1272.683
"1554895_a_at"	158.45576	42.396366	74.26426	79.99298	104.63169	68.67895	72.31174	334.42117	259.3012	50.185093
"1554897_s_at"	708.203	771.99396	776.4307	939.82263	801.03064	553.2653	909.3598	769.7183	680.4115	111.11022
"1554899_s_at"	1339.3275	770.2196	875.85034	773.43555	562.2813	1245.287	2428.2354	207.12943	407.56808	80.13942
"1554901_at"	47.499985	157.421	482.77832	244.82602	129.91115	326.5328	396.826	302.902	212.57361	354.52002
"1554903_at"	176.29231	367.56918	652.65704	463.28845	149.68501	940.89716	226.44434	659.7483	824.7841	424.76324
"1554905_x_at"	589.9512	168.37392	1212.8353	76.56147	530.66797	950.7688	677.3809	831.3316	1537.588	573.5244
"1554906_a_at"	398.59418	279.2125	356.383	225.86781	528.71625	715.44965	521.41034	372.99146	85.82413	832.39594
"1554907_a_at"	1196.3778	749.9589	1640.4258	881.716	1343.6675	1400.4935	555.1311	348.27676	423.79288	1203.2004
"1554908_at"	554.1719	73.21373	423.28287	31.427351	457.36115	601.82684	106.426414	62.62553	165.06064	587.70795
"1554909_at"	256.41986	53.31063	143.85818	319.15024	478.0711	145.57953	196.761	69.18968	467.33188	84.62065
"1554910_at"	161.0101	27.381737	61.46892	61.367466	352.25464	216.71454	174.3671	172.48984	282.7614	40.86884
"1554911_at"	766.4379	158.10257	926.34515	123.43917	177.04214	156.6681	967.4347	67.54081	195.99269	130.87067
"1554912_at"	431.47394	201.78082	36.318066	549.9536	110.705605	70.61219	88.25974	186.79459	20.313341	32.440872
"1554914_at"	338.5849	248.85231	171.04362	292.67474	635.64746	479.62213	641.137	360.33777	395.03198	390.29944
"1554915_a_at"	1317.2577	878.9273	959.24194	2150.3005	1622.1118	1427.3943	1513.2272	2633.3564	1655.153	984.8827
"1554916_a_at"	761.09186	370.03452	401.94156	547.78326	710.8404	366.30673	685.25934	836.3857	904.8862	452.07086
"1554918_a_at"	1446.5771	1220.0935	618.0274	472.31424	580.745	761.8104	840.5955	3557.0015	3870.692	55.58592
"1554919_s_at"	2838.9863	2753.3865	3534.4226	4067.0452	5385.419	2818.5437	2435.4346	400.5477	763.4531	1730.7874
"1554920_at"	7.5939703	33.22338	124.941124	72.045944	49.896286	26.318516	20.922907	9.63083	11.956099	79.80747
"1554921_a_at"	518.43585	318.52203	448.49268	334.28253	19.628304	217.24582	429.89078	305.73065	223.06584	273.8405
"1554922_at"	235.2945	274.85046	22.438944	223.20517	366.1546	88.0259	302.82288	302.93204	162.38509	231.28285
"1554923_at"	29.211807	27.03534	43.447052	47.767506	44.387886	82.36001	40.370026	33.723614	47.974068	19.283714
"1554927_at"	103.804924	53.77797	127.54331	105.32334	137.25676	116.2252	116.136795	49.785477	98.53718	64.395096
"1554929_at"	285.96915	164.8772	347.38364	129.58751	232.04419	215.33595	100.06028	11.743172	314.54272	240.83604
"1554930_a_at"	2483.1147	2515.321	1786.5707	2294.192	2006.0604	2069.9329	2954.5332	6560.284	7316.6484	1465.9233
"1554931_at"	199.28519	349.63138	323.69904	26.395416	392.88992	460.6205	225.0488	204.89609	250.10277	268.15875
"1554932_at"	95.55652	21.703789	38.63782	79.741264	52.155434	60.706093	27.716732	13.739149	18.681778	40.49164
"1554933_at"	652.7979	444.1923	583.56866	350.61478	401.54614	637.34247	468.49457	629.06024	585.3095	961.25055
"1554934_at"	775.9028	608.4914	890.2412	1010.6881	1435.0865	1061.2773	1081.2582	426.6509	537.09906	843.5693
"1554937_x_at"	543.6438	326.06107	172.08492	287.0132	681.4518	781.7157	503.58603	410.31683	708.88666	257.03067
"1554938_a_at"	755.0148	433.12775	1000.5475	1466.1846	1645.5151	1458.9056	1701.4651	619.76465	537.0863	1224.9303
"1554940_a_at"	51.985176	73.5529	169.31818	60.55315	79.70122	86.01151	63.828773	28.622107	42.51377	799.99207
"1554941_at"	59.620373	353.08563	99.29324	119.058975	56.865017	38.066345	69.304794	37.312164	67.78616	122.054245
"1554942_a_at"	281.29755	106.49795	185.29143	403.32712	499.7352	248.28917	187.35072	159.15582	436.76663	120.327286
"1554943_at"	921.5424	513.4613	915.38	910.0071	780.3911	1064.8418	1165.0792	522.7296	1301.8665	665.1214
"1554945_x_at"	643.7587	415.6768	694.3651	332.38226	419.06918	355.8016	397.08273	367.74286	527.30054	623.6747
"1554946_at"	524.7829	142.22081	62.668877	176.16585	521.4724	94.8273	568.4457	92.10622	66.769684	179.08331
"1554947_at"	315.39093	124.99188	190.1408	602.134	179.79262	322.7413	230.0304	143.86467	280.9965	168.18584
"1554948_at"	654.20056	501.2273	165.0012	358.7837	843.92444	399.0353	403.8841	732.7625	552.0475	691.7435
"1554949_at"	567.8299	444.6838	442.2306	367.01553	410.18497	131.24269	749.1618	78.90439	250.35316	380.49033
"1554950_at"	103.115875	284.3485	155.45851	37.323265	222.02542	106.646225	200.05525	40.13327	536.1698	350.6353
"1554951_at"	75.350365	15.025463	256.38486	190.44122	96.87044	288.03885	125.82798	343.32883	131.78859	231.7879
"1554952_s_at"	183.48833	49.83328	81.378654	80.17215	158.93517	154.95102	55.539852	95.58744	127.51181	68.404945
"1554953_a_at"	372.5802	107.93973	908.0896	195.12422	564.1113	457.02734	940.69257	388.68857	345.94614	662.2353
"1554954_at"	100.72195	282.88644	546.6657	258.25653	135.12213	108.24093	231.01823	38.07618	238.5481	114.96361
"1554957_at"	338.6787	432.3904	560.0917	45.74612	552.3189	888.35455	1238.31	520.19196	540.78064	439.43594
"1554958_at"	818.2284	127.124214	539.3307	631.7145	1281.4733	712.72614	1209.953	479.0602	624.00635	500.7579
"1554960_at"	386.8649	68.84312	541.3434	76.10083	240.18639	93.66639	342.26056	256.0431	54.819633	143.98613
"1554961_at"	119.85343	108.04022	121.33713	61.810238	145.48552	187.75133	140.77058	301.60757	174.40475	76.55769
"1554962_a_at"	802.59625	839.9426	540.13965	362.37976	478.0545	644.8508	145.15948	727.2584	392.17645	767.1572
"1554963_at"	339.805	291.76172	552.2167	70.99874	157.83755	54.329494	321.2241	130.93762	330.0046	154.41951
"1554964_x_at"	224.14198	20.27946	136.2943	168.55109	68.61294	57.945175	51.036804	115.46642	119.411224	88.32768
"1554965_at"	708.6687	461.0656	1209.6422	983.7737	996.82983	629.3226	1029.3293	167.12717	537.20825	296.7422
"1554966_a_at"	2556.0078	3238.399	1915.1426	2520.9177	2410.1106	2000.4688	2020.4779	14124.056	12085.584	733.56274
"1554967_at"	297.2421	286.29388	871.62463	239.55609	707.1809	531.2295	254.37369	185.38484	780.3828	78.388084
"1554969_x_at"	76.41977	330.79462	322.935	433.10834	549.6604	343.8606	301.16016	519.23096	503.9079	194.36858
"1554970_at"	24.614525	47.294205	109.62101	38.880623	116.12059	44.00025	38.22536	78.54707	38.030094	30.094553
"1554971_at"	342.15433	217.36345	485.8882	225.0021	545.3062	264.5642	298.533	249.27652	261.42978	330.73898
"1554972_at"	302.57336	332.5677	810.5911	523.5513	723.1708	452.17715	359.31445	446.94785	441.99432	267.81778
"1554973_a_at"	854.7392	1136.9391	954.3015	1148.8945	1430.4241	991.9731	1242.8943	808.829	456.68228	727.5412
"1554974_at"	664.728	57.76856	270.14758	291.85474	88.36241	70.28061	97.49907	107.06512	70.178215	217.41154
"1554976_a_at"	28.35559	51.716267	52.974464	68.83269	159.07817	79.19927	332.67322	38.4738	122.07575	8.914975
"1554977_at"	180.4424	531.5457	653.73065	104.18369	378.17755	639.7541	530.1865	544.49457	144.86438	787.9286
"1554978_at"	212.84978	532.1133	243.23479	436.3431	560.4882	547.6365	259.50494	384.7517	570.22955	1871.3219
"1554980_a_at"	1203.4181	692.7885	1235.1119	852.01904	1063.4603	1257.1854	1037.946	1320.894	1846.2334	1271.7511
"1554981_at"	24.764317	8.404641	216.70218	20.791103	30.389023	65.18695	43.66132	67.712204	36.712112	181.83708
"1554982_a_at"	25.645945	18.695889	64.6522	45.07123	44.36107	20.454971	47.131977	7.7214546	70.0666	23.017778
"1554983_at"	432.0603	94.73915	192.38744	99.915306	459.26526	119.19689	195.87773	65.006676	106.39295	218.75099
"1554984_a_at"	460.04913	388.04367	598.91425	339.21036	915.23456	863.9854	986.446	266.62384	472.57098	108.488846
"1554985_at"	993.6803	1373.7251	1217.1692	1436.9232	1324.5251	593.02167	704.00055	465.39224	248.86215	739.03973
"1554986_a_at"	3705.0583	2110.7727	3560.2988	2932.8254	4295.7827	3458.1204	3686.0662	2027.4441	2084.9072	1324.194
"1554987_at"	617.3504	503.41736	1173.4991	666.3195	70.117714	678.1814	1014.1358	531.5069	615.4846	578.59393
"1554988_at"	64.38902	12.199217	28.828196	11.978473	18.135021	23.101748	11.807251	28.718243	41.149296	11.265285
"1554989_at"	433.21198	168.19543	624.8075	463.9837	548.11835	394.4652	482.60892	816.53906	450.8965	503.0671
"1554992_at"	511.8452	766.1334	796.3494	764.6265	900.67334	275.14554	688.7956	765.27655	1185.3501	80.760025
"1554994_at"	207.76476	89.13315	345.2036	116.039696	378.38107	75.685524	432.498	324.0406	264.90207	59.336815
"1554996_at"	45.316032	118.08118	169.59497	44.37737	51.40458	57.540382	60.942265	183.59319	42.647327	32.781597
"1554997_a_at"	304.36716	42.816494	1195.9391	23.470127	384.30148	2308.6226	1114.5488	257.84848	680.5202	116.02889
"1554999_at"	351.97385	162.95682	136.25407	156.38959	39.13258	35.321	677.5713	58.96187	233.85252	512.4648
"1555000_at"	373.26392	436.30682	510.46884	99.4073	305.74728	468.9113	247.16614	226.46729	426.57794	700.2804
"1555001_at"	653.8391	527.33734	621.2101	455.0801	833.9399	864.5281	1075.2389	311.78458	687.15106	746.67017
"1555002_at"	148.52234	5.226021	32.154728	53.732063	341.54385	202.97395	21.02315	19.968184	35.0478	20.08641
"1555003_at"	108.86234	76.007645	219.19315	98.9578	71.82393	185.56572	562.5931	220.75258	319.13147	289.58615
"1555004_a_at"	432.38647	311.40125	767.4378	638.14374	907.30426	269.98047	559.039	1677.1011	2062.4966	432.40628
"1555006_at"	165.98802	825.1602	69.88502	87.67554	112.197205	103.404945	69.90626	267.4809	204.91579	271.64096
"1555007_s_at"	917.024	7708.3433	827.0591	1098.2305	1337.937	466.29147	840.6033	994.01105	1200.2867	1532.2552
"1555009_a_at"	602.9308	78.30021	283.46808	1093.1287	759.0922	349.84076	706.92267	929.0903	1257.2281	191.6929
"1555011_at"	66.13365	68.19728	70.79471	154.64961	326.27274	78.847115	747.1507	107.304665	247.63751	40.56056
"1555014_x_at"	761.9735	385.02377	597.61865	615.6864	498.3431	670.7035	703.2592	698.03705	262.6006	443.39056
"1555015_a_at"	1423.2744	2362.9182	1509.106	1692.5586	1253.2114	1282.8912	1692.0984	1298.5305	1318.0265	1096.5453
"1555016_at"	706.5332	672.33734	1023.2602	460.58984	993.2608	757.7153	518.9403	494.76483	1095.6155	491.66656
"1555018_at"	263.03467	119.62399	324.67926	353.74637	26.934662	39.030907	72.65955	29.498287	301.9484	25.08625
"1555019_at"	432.36673	465.33682	136.00009	405.1652	900.1433	746.2511	547.8815	52.03857	75.80636	288.2201
"1555020_a_at"	1012.61145	501.93585	1114.2582	663.7693	2057.8376	1282.681	838.28906	236.92453	293.45877	551.3866
"1555021_a_at"	1161.9419	1399.9314	1366.1056	1323.533	1581.3699	1206.3644	1758.3083	945.6243	1206.0219	951.77014
"1555022_at"	355.00006	386.6799	365.49606	117.220726	310.25156	168.86937	92.12219	453.41254	687.80206	322.00543
"1555024_at"	325.9482	125.50757	218.49243	447.20517	485.515	555.34045	503.67444	226.27605	262.67886	160.85413
"1555025_at"	90.06484	45.306374	575.3152	227.46722	416.7105	56.61853	111.05489	90.54127	286.23532	95.69339
"1555027_at"	390.8578	212.35327	313.32065	422.0485	217.85928	147.0181	627.0536	322.4856	65.51193	33.493156
"1555028_at"	145.19077	148.94128	137.96724	373.09656	127.86514	311.6823	145.6168	45.637543	339.07657	285.40125
"1555031_at"	74.35488	45.22295	328.60803	55.903004	481.31784	96.008835	323.4395	54.876038	196.43985	254.34918
"1555032_at"	646.10394	140.48651	456.64243	381.18768	297.13867	163.527	224.31558	274.27762	724.51337	589.2646
"1555033_a_at"	79.20777	27.222586	33.823296	31.093538	132.49623	71.34481	116.65266	230.55522	153.05782	16.576754
"1555034_at"	190.61916	312.30322	247.44542	225.0198	107.51607	27.111263	46.88512	21.939718	56.023144	202.90945
"1555035_a_at"	29.32018	27.981123	66.75276	66.19696	95.465294	131.6966	80.13099	18.519117	68.57974	23.973518
"1555037_a_at"	80669.234	24741.379	65548.12	20134.38	71692.97	65310.805	58769.805	7845.376	6804.056	5673.1543
"1555038_at"	41.42127	12.06181	103.675964	82.46409	49.85021	20.59123	103.44566	15.743511	19.358747	19.310225
"1555039_a_at"	1419.6709	948.08307	708.7231	944.7374	701.9284	772.4622	872.3005	2037.6622	1971.854	118.20909
"1555040_at"	591.7793	119.15491	382.0968	251.11024	483.42694	358.97543	262.66476	238.37358	345.63647	415.64124
"1555041_a_at"	10078.097	5667.0317	8923.274	4421.1714	5758.715	7410.7983	14166.674	4626.8687	3708.1594	1911.508
"1555042_at"	831.6914	542.1139	405.97946	675.7775	481.44684	547.5107	267.58368	313.26407	713.8184	654.53467
"1555043_at"	537.0525	468.61243	673.3652	530.59686	232.6751	322.0751	715.2267	184.5568	307.84186	387.40997
"1555044_a_at"	63.35567	38.050053	90.30386	92.753815	71.60037	112.237595	71.09465	35.398586	83.05455	62.903
"1555046_at"	87.20065	7.3353567	123.386765	9.801977	55.523346	188.51707	141.79744	210.69814	199.33788	144.68033
"1555048_a_at"	772.43054	55.862938	539.76917	428.20905	1019.1987	351.1951	726.38794	18.787647	27.9035	354.74847
"1555049_at"	659.3184	198.98318	794.41846	98.5218	637.30707	304.4889	769.8805	238.63197	228.87758	52.689304
"1555051_at"	95.57867	191.43437	218.55925	42.075138	449.14737	186.62094	375.64966	31.96483	263.04755	365.9537
"1555052_a_at"	2206.1697	580.17426	2475.8867	1976.4429	2128.3328	3866.4365	3140.7783	465.29565	634.9497	413.20023
"1555053_at"	239.62955	197.84544	681.0325	439.7921	340.8958	784.634	896.74524	263.91858	134.95697	353.21475
"1555055_at"	42.075516	0.7109759	18.2675	175.06097	74.68791	108.50925	107.28132	94.773415	50.213375	8.049043
"1555056_at"	624.2976	336.3035	413.44247	410.59946	730.7603	671.9419	669.30115	441.44427	766.79553	531.17566
"1555057_at"	319.1886	433.69345	530.7679	542.52734	497.1188	447.90625	90.064835	291.58307	354.4807	835.25995
"1555058_a_at"	4558.4272	13313.3125	8561.6875	4369.901	5529.0483	5369.8735	4651.8745	6744.5806	4904.9375	4845.029
"1555059_at"	344.12094	165.98863	284.24106	372.5791	170.72711	250.17876	96.3075	198.23279	463.03345	294.79614
"1555060_a_at"	711.1752	521.51245	540.1404	65.29106	105.830124	396.0657	917.05804	99.375015	39.654457	90.10688
"1555062_s_at"	754.61456	524.2186	846.38367	1094.28	1294.3221	860.79156	986.03265	1274.3708	1334.7175	632.9082
"1555063_at"	815.81744	1082.4644	1280.9838	634.8714	787.2943	1772.3256	1186.2869	665.3681	642.2055	464.4776
"1555065_x_at"	788.01874	757.1451	1413.1049	899.5659	1132.3436	1083.3923	971.73956	427.28256	604.3649	782.8485
"1555068_at"	159.75938	22.496553	94.13452	350.64328	98.884315	76.2053	352.63553	248.81163	237.6926	111.79945
"1555071_at"	130.90115	169.28745	14.13512	77.145134	377.0109	277.55753	182.70544	87.87973	198.29564	108.70324
"1555073_at"	345.53622	286.23456	360.3147	415.02872	778.87384	454.88	792.4145	180.83716	260.62793	177.85123
"1555074_a_at"	344.2738	405.30005	880.8181	363.3491	701.68384	527.1575	582.39056	360.61798	434.5941	1222.0696
"1555076_at"	1239.9174	556.57947	1583.9607	1186.5734	1607.3248	472.6919	1599.9716	713.94196	705.1256	724.92334
"1555078_at"	852.12964	695.9287	417.93228	348.92743	982.9668	1386.9344	339.84625	402.632	182.83743	1071.4595
"1555079_at"	28.42384	206.17863	80.53632	43.350296	122.620834	24.590267	52.741833	107.7386	176.5048	374.07272
"1555082_a_at"	1702.9059	2824.7	1626.8096	1954.7953	2081.4463	1368.4031	1495.2025	761.62933	504.5932	731.9262
"1555083_at"	609.46783	566.8334	399.32446	323.51495	730.7127	1238.8512	331.86264	235.92471	759.29443	964.46765
"1555084_at"	601.52014	322.67715	430.94095	228.74355	504.29062	554.6319	531.1354	64.19608	303.95032	139.40071
"1555085_at"	522.536	326.1043	270.39438	548.0975	523.9729	405.13577	725.4424	37.722683	335.17725	393.6506
"1555086_at"	1787.6298	1015.16644	381.8535	1013.8857	509.55423	993.82495	1211.5333	1066.9132	1459.9543	2655.672
"1555088_x_at"	2696.7466	1742.4442	1580.1144	2447.407	2376.6323	2664.5288	1844.6799	1503.1328	1283.8949	3100.2173
"1555090_x_at"	2402.4275	3409.1877	1548.3176	2187.3342	1373.9634	2207.215	1972.5216	885.99634	910.21204	1548.7896
"1555091_at"	385.6966	323.72757	311.36404	480.2796	624.42	160.55676	867.6231	668.8667	345.60706	62.32029
"1555092_at"	723.4349	500.52356	876.6932	795.13403	671.7529	578.09186	846.8118	255.55019	708.38477	569.075
"1555095_at"	267.09985	347.87616	424.4433	31.857439	58.43963	109.37105	263.8073	47.54552	18.683361	68.58426
"1555096_at"	975.2627	748.3893	623.2867	291.56747	309.64185	959.9835	899.6002	99.17843	529.1676	607.53723
"1555097_a_at"	327.69357	285.42935	148.47974	415.63754	505.20618	263.3962	352.05872	692.22754	1055.2919	33.681324
"1555098_a_at"	1568.1592	1938.1237	1695.8613	1934.3148	1982.7761	1856.9811	1578.6403	59.016182	655.1074	961.0618
"1555099_at"	944.3229	395.3173	1182.1532	385.66843	1446.2542	880.98206	1538.2589	319.12082	553.0172	377.8149
"1555100_at"	750.22546	904.60913	1477.8184	1105.473	984.92944	1283.9713	915.2424	547.7222	505.42093	513.619
"1555102_at"	4.603715	4.812024	54.068577	3.420209	12.862224	11.710159	17.59048	5.1101866	24.017042	11.75632
"1555103_s_at"	260.27914	173.5583	32.204815	92.37013	59.93269	66.6464	32.569027	229.02196	132.75728	26.920664
"1555105_a_at"	896.2548	1030.2526	1168.9834	1215.9045	1104.6659	1357.0718	1473.5253	2320.4727	1659.5922	1120.6836
"1555106_a_at"	1614.7543	467.14368	1204.9492	1796.0233	1329.9059	1204.9747	1665.55	5196.212	3960.4778	607.78674
"1555107_a_at"	425.17493	739.72614	526.1762	514.0648	864.2396	641.8369	490.39102	504.68204	1273.0024	1173.2904
"1555108_at"	761.85443	268.0292	266.75592	348.3417	765.1543	728.6644	368.0402	299.19736	370.4002	242.08623
"1555110_a_at"	107.3901	64.71954	97.91137	73.33957	43.70161	125.28117	117.30446	82.86724	72.37061	56.32077
"1555111_at"	41.041206	18.243687	74.076904	7.354633	27.497326	21.096245	14.773389	63.041172	41.24154	175.28204
"1555112_a_at"	4887.1914	8432.801	5479.223	5629.7505	5720.8604	4984.959	5490.7065	516.5919	773.0213	2362.9817
"1555113_at"	508.75833	464.25024	795.6883	412.5834	982.28345	408.76685	1037.1837	296.24973	358.26364	594.8667
"1555114_at"	74.01355	90.13818	149.65263	425.3654	70.063545	69.84128	78.26983	32.137463	290.35666	164.14261
"1555116_s_at"	27.003931	49.238983	236.21233	62.70623	58.87354	45.19265	183.60228	29.064089	55.13617	47.964058
"1555117_at"	638.4858	53.021023	404.368	249.59337	687.38983	191.64517	148.89194	402.3574	358.06796	283.49744
"1555118_at"	208.22687	264.04202	254.35919	667.7084	93.203636	47.82511	350.5736	84.48471	20.495726	297.70648
"1555120_at"	77.3538	234.02048	114.82191	46.20702	159.43301	105.99083	238.32362	62.616524	243.36324	116.587166
"1555122_at"	497.71622	983.246	563.6217	536.9139	1039.8474	746.904	589.8091	853.4981	668.0853	1166.3737
"1555123_at"	578.8166	326.06183	810.052	393.12613	798.5714	683.66534	466.51746	217.53438	442.96744	810.94855
"1555124_at"	312.70346	116.20557	515.73694	369.35968	651.14044	473.95145	143.92082	429.4458	624.8145	760.75397
"1555125_at"	2393.9202	2549.092	3054.85	1882.8337	2168.7048	2452.5686	2196.6877	1073.9775	1375.4683	1008.7998
"1555127_at"	493.2226	277.18292	415.6635	488.95734	423.16235	610.6259	666.8483	298.88998	42.45786	587.8533
"1555129_at"	968.5477	879.0793	1402.5334	685.6353	1170.0964	1069.2821	877.99554	623.4741	1202.1699	826.1749
"1555130_at"	142.26692	97.577896	159.24355	297.14456	282.1014	296.79123	266.80023	58.288315	143.15297	120.92773
"1555131_a_at"	1338.6605	1381.8326	2392.5496	3063.9648	3263.145	2400.7322	3338.326	1051.848	1478.0499	1619.5593
"1555132_at"	490.85394	324.43185	172.35341	222.24774	211.77942	757.0789	406.991	483.27576	204.98549	287.26346
"1555133_at"	291.47504	82.52018	35.1158	73.07469	408.97162	514.29504	60.235653	244.5834	169.39272	55.946384
"1555135_at"	334.05234	231.56837	55.55722	127.102974	105.87762	302.10718	95.362175	199.33162	110.59139	311.65106
"1555136_at"	57.612534	166.70494	122.40621	517.18	51.132675	54.698635	416.01556	169.73857	50.217354	130.23933
"1555137_a_at"	618.5342	192.27942	758.9245	116.02785	284.87292	350.2296	404.1699	1429.7644	1541.6335	295.46027
"1555139_a_at"	125.43797	46.135166	753.4744	504.55313	514.61847	158.54573	159.6884	170.04427	654.633	194.85861
"1555140_a_at"	1286.6283	1421.0791	1040.3302	1571.0634	2178.7244	1173.2863	1015.2254	1098.649	623.2589	1472.1748
"1555141_a_at"	779.8227	393.8489	534.92914	475.71414	812.2301	304.5078	944.55396	148.45245	80.83652	566.7673
"1555142_at"	42.437775	14.699404	76.97434	209.16551	56.575623	30.725708	235.79736	21.852459	212.75938	68.98297
"1555144_at"	605.0816	230.52625	491.46368	158.52179	614.81165	241.30084	108.50735	423.75653	43.256107	539.9488
"1555145_at"	879.5432	820.999	525.546	307.28134	1268.8824	1359.3765	479.0584	450.69278	696.8866	366.50034
"1555146_at"	305.76532	166.08821	59.64232	461.95862	439.41193	42.635002	196.8376	61.97003	48.54789	65.41249
"1555148_a_at"	621.03864	307.65253	480.2431	864.5729	396.54565	529.2077	231.79099	89.21884	26.925581	87.88989
"1555151_s_at"	65.933624	17.713987	37.37557	79.13019	129.82129	56.34868	26.89829	18.325853	169.72014	91.72319
"1555153_s_at"	283.3571	53.44157	204.04655	44.311455	624.9027	344.83118	511.02393	376.29724	445.4166	154.95967
"1555154_a_at"	452.10626	357.55887	163.07224	305.30365	446.15448	450.20334	241.40584	2608.7605	2201.1582	392.84778
"1555155_at"	1480.1622	936.63	2282.0576	1500.685	2337.7568	929.1724	2641.9998	338.77383	2252.5608	1345.6334
"1555157_at"	665.44293	152.29518	869.0994	664.44794	978.76917	827.54285	793.6766	334.16882	434.5121	623.2522
"1555158_at"	392.48453	488.31177	627.6107	575.8998	400.76825	527.8154	421.89066	120.84119	276.5024	70.31648
"1555159_at"	468.9873	280.06006	569.6721	324.6469	841.6806	380.3528	707.83636	267.91727	613.6208	544.99884
"1555162_at"	41.893585	27.933105	58.917583	36.605793	64.95338	82.73624	37.102642	19.743202	98.2209	44.925648
"1555163_at"	451.38794	268.52176	243.0451	167.30841	474.22614	509.43768	327.46246	304.6331	491.13263	418.94403
"1555164_at"	47.379967	78.108574	54.224197	46.273716	81.01507	428.95035	453.13586	35.431164	86.97574	372.9369
"1555165_a_at"	311.92438	742.0721	561.73016	516.0764	537.47626	446.69305	299.71066	440.538	509.4586	381.8787
"1555166_a_at"	498.91193	1067.5653	560.46	823.0376	794.8272	833.2084	456.08688	231.98906	145.54482	383.95212
"1555167_s_at"	375.94373	662.7547	67.086105	124.16389	1304.224	414.96158	321.1608	4403.765	6123.0425	43.518
"1555168_a_at"	891.91547	148.16081	460.5786	416.20294	1036.5155	859.0476	1036.011	537.6364	300.63574	592.9093
"1555169_at"	158.43456	421.48358	94.697	75.81673	446.5804	309.6787	275.56454	260.17892	422.40802	226.9959
"1555171_at"	647.2213	250.51973	399.4368	174.89612	600.71576	1025.4583	431.54443	290.4633	472.64847	59.28083
"1555173_at"	64.32718	426.60278	47.707554	493.1825	504.39316	245.49689	103.2095	264.33075	83.90814	52.925327
"1555174_at"	38.599083	387.94635	566.6357	132.57251	175.97768	76.93553	120.07884	55.738373	112.57425	106.67741
"1555175_a_at"	822.4541	476.91116	727.13495	324.05112	673.5615	816.3856	923.6544	615.06885	369.09088	216.03604
"1555176_at"	725.8316	525.2925	684.86694	665.0619	435.07687	708.5683	666.64075	356.52713	808.437	282.1192
"1555177_at"	552.3347	51.705845	600.32056	528.00366	357.86447	350.31714	603.0488	313.00232	230.98352	42.084255
"1555179_at"	55.794395	21.330313	177.9126	133.8242	84.495834	189.84174	98.91179	103.22124	51.969196	23.90228
"1555180_at"	638.13074	82.40523	1098.0654	510.49716	171.37561	139.42708	187.20345	468.32712	314.1821	514.2635
"1555181_a_at"	2505.0576	3034.4067	3778.278	3379.085	4642.0845	3468.395	2757.1045	2636.6729	3594.162	2927.1292
"1555183_at"	67.48414	322.7585	36.00428	42.0564	90.85809	74.11555	30.994995	400.24014	105.008194	18.971687
"1555185_x_at"	165.86906	946.5345	1224.4435	164.28139	265.12833	1767.07	1195.9166	1279.5144	964.1248	86.14506
"1555186_at"	17.155071	126.43445	287.56696	239.94058	163.45712	40.088245	332.2002	296.1309	325.43152	58.629177
"1555187_at"	796.9431	500.50372	825.62354	839.50287	1353.0629	404.27423	1195.3009	266.1659	209.23347	603.32245
"1555188_at"	941.78436	417.0379	483.9655	876.2065	851.97156	927.7743	1181.4739	657.5491	488.30847	747.74646
"1555189_a_at"	257.62378	130.51442	490.1494	483.3927	357.6704	64.4677	367.83167	60.500214	139.14055	107.20133
"1555191_a_at"	407.86087	781.5845	102.74638	81.49364	484.75064	664.1506	1313.6431	210.33759	191.86873	493.54532
"1555192_at"	63.39579	42.920834	368.0796	85.25632	255.22545	323.9792	218.01382	29.718477	345.3499	361.9157
"1555193_a_at"	793.9728	1829.293	79.87827	1346.0996	1154.9337	686.27136	814.0754	1324.665	1029.2008	1487.9719
"1555194_at"	351.31616	222.43301	209.64064	165.05736	193.0834	390.5532	275.86893	126.05585	296.19373	884.0058
"1555195_at"	223.26689	47.413017	548.3361	265.05258	678.0355	49.161846	89.47679	37.37159	107.456535	225.91689
"1555196_at"	609.84265	321.25723	1108.8436	543.87335	741.86115	633.43317	167.55199	368.01752	486.85193	646.2241
"1555197_a_at"	221.54367	528.76624	131.98251	55.05455	81.48562	76.24327	125.81916	32.11023	41.763153	55.863003
"1555198_x_at"	2521.9453	2950.7585	1909.9414	1503.0394	598.958	1348.0084	1844.9524	432.31915	334.24585	725.36346
"1555199_at"	163.6641	155.44647	471.6104	196.91333	310.62146	372.62592	52.158726	57.46777	228.7934	238.12766
"1555201_a_at"	1918.8206	1250.0535	1721.2598	2224.7961	1835.9896	1951.4116	2496.2803	2135.7532	2028.8816	777.71
"1555202_a_at"	1426.7097	1853.6626	1249.8363	1416.449	1993.2222	1220.8854	1645.4406	1644.1906	1630.6123	1060.2874
"1555203_s_at"	2494.8828	1006.98145	1254.0918	3881.018	4185.1963	3260.5188	1753.1807	302.79318	67.08437	573.36804
"1555204_at"	76.94582	53.224304	168.0483	39.800182	70.34467	38.235813	83.10462	50.16522	63.198097	48.11033
"1555205_at"	538.0491	363.04315	757.431	762.77356	1019.95764	707.07477	684.33026	525.07697	764.9593	612.0167
"1555206_at"	911.88043	666.1662	1484.0052	470.95477	852.2101	470.41748	925.5669	575.23737	906.48175	274.59348
"1555209_at"	985.5243	471.45636	319.17136	647.9287	1527.7534	619.5876	771.304	922.3306	570.2149	408.74234
"1555210_at"	273.19913	103.52504	100.46982	228.31354	99.74672	308.81342	183.58496	244.04512	86.40154	446.4453
"1555212_at"	620.1108	425.45926	1087.9315	956.31116	667.8807	668.19147	805.6288	109.602486	592.68774	433.874
"1555213_a_at"	103.05178	44.16001	440.70987	95.233154	180.94063	272.76755	135.37714	35.22714	104.21811	47.83112
"1555214_a_at"	56.73496	34.030933	52.680603	55.691193	68.89684	89.87841	47.511597	35.426155	53.997	33.91707
"1555215_a_at"	1237.7031	998.21265	1959.9366	2067.9365	2264.4194	1243.9982	2243.5674	508.66434	1062.0131	1148.3264
"1555216_a_at"	70.51374	846.4937	536.3176	650.0181	187.4263	141.7914	802.78015	519.1476	466.69852	270.28412
"1555217_at"	191.83061	31.920527	61.22123	290.48633	507.23068	77.5977	387.63278	124.14385	160.27548	664.44904
"1555219_at"	290.18304	136.63419	542.3416	445.8957	679.03796	334.0645	659.28864	105.839264	135.32988	343.72122
"1555220_a_at"	29.613745	27.45378	61.789024	87.58472	44.59696	98.12691	38.175056	58.48377	113.87164	57.024963
"1555221_at"	129.14449	51.145634	56.855587	109.494446	256.47522	88.77447	29.337852	83.59173	43.714176	30.998438
"1555222_a_at"	720.34	761.97797	1314.023	1094.3676	1205.7158	1360.2866	823.0266	1104.9308	937.394	820.59814
"1555224_at"	189.57286	132.50182	90.107635	88.31326	328.8261	52.549274	69.87267	15.926261	46.61051	84.563416
"1555225_at"	397.8374	1152.7386	336.465	895.3479	437.9733	1437.1722	409.79834	1089.2494	1203.0651	1607.1498
"1555226_s_at"	24352.395	19652.625	22988.904	31890.434	29466.23	26776.592	33273.19	20537.943	22024.38	16049.414
"1555227_a_at"	485.66696	60.03264	57.95584	29.663443	98.84674	259.4494	270.78113	157.6911	273.0391	175.93365
"1555229_a_at"	91.07881	359.4915	116.35841	152.83502	194.10889	61.73227	584.7555	6013.807	6051.1826	191.18686
"1555230_a_at"	365.0665	20.212208	352.37244	365.51648	228.75714	113.60245	35.286022	40.967216	86.30656	19.517971
"1555231_a_at"	1599.3385	641.00256	1779.9017	798.04675	1380.147	1329.8253	2372.3777	179.37794	134.96135	567.66345
"1555233_at"	52.72762	301.33893	40.144604	76.23368	78.61693	285.60992	114.136635	733.4985	349.27286	67.09315
"1555234_a_at"	542.87994	701.67883	126.75746	142.74678	1045.9862	63.14106	81.11486	1018.34973	698.40204	70.28767
"1555235_s_at"	259.63348	23.696583	62.207275	30.104795	56.38565	181.00487	56.373146	41.419994	634.5486	56.814552
"1555236_a_at"	146.65045	107.245926	196.03297	96.12829	197.95172	657.9692	198.92561	59.62534	109.57914	572.3689
"1555237_at"	502.55508	315.61417	355.97778	401.94897	93.443245	474.15482	505.39706	331.2324	456.99966	42.830544
"1555238_at"	1277.0543	890.7172	1419.5907	1194.74	1271.0425	995.0864	1645.0253	958.4949	831.24054	718.9906
"1555240_s_at"	613.271	527.5443	270.4953	611.25885	983.075	748.405	1334.6334	2535.4285	3132.5127	99.26086
"1555241_at"	1239.0874	1547.9736	1453.5665	1182.0203	1114.497	567.7421	1219.544	1660.0967	1472.7604	1525.3418
"1555243_x_at"	1357.1945	1464.4336	1618.6926	1079.3478	1179.8657	1360.1544	1268.785	1330.8475	989.49426	1263.7618
"1555244_at"	229.16887	209.05032	228.36023	75.78918	329.33777	432.57693	109.927025	142.22295	360.6232	142.0371
"1555245_s_at"	194.18689	95.24336	48.242325	1303.0626	54.484936	75.56064	60.829838	53.81966	54.31074	58.80234
"1555246_a_at"	309.30133	489.71094	124.727875	267.96826	1021.17334	352.27438	83.31468	127.300545	319.76266	88.8949
"1555247_a_at"	690.6292	353.46054	596.5301	716.6951	946.0734	526.69214	730.1553	692.47534	515.42804	104.75457
"1555248_a_at"	2500.3096	2845.083	3344.318	3412.7988	5832.4204	5227.024	2678.3372	732.22797	1341.7006	606.0694
"1555250_a_at"	1544.7186	726.8583	1092.6902	991.31744	903.97424	951.02844	932.4091	359.09247	177.14214	1349.161
"1555251_a_at"	84.48608	33.958294	131.69865	57.17454	133.71964	101.73025	109.34026	94.58246	96.14676	31.604836
"1555252_a_at"	896.39935	88.95886	287.67126	2114.622	186.70305	137.06462	1298.4835	72.60396	142.83055	61.60516
"1555253_at"	1905.2705	102.49301	2304.8628	19.010717	524.65845	1511.9579	1355.4696	131.51443	15.200654	119.35496
"1555255_a_at"	3977.0815	2137.811	3669.5186	5447.8706	4726.094	3927.6638	4590.7095	1547.6528	1718.7296	4385.4663
"1555256_at"	70.09939	159.92203	185.13158	168.60675	69.80918	199.94307	78.281456	36.63656	259.2391	126.92183
"1555257_a_at"	821.8177	364.01157	477.57645	507.53046	1126.1252	821.4414	1203.9811	166.21738	199.56349	228.205
"1555259_at"	426.70184	352.76425	335.09714	348.4001	769.3062	539.4052	637.6878	1045.2261	1198.8998	633.79205
"1555261_at"	1155.4651	975.0698	792.6198	602.96027	327.35556	1065.8823	664.83203	959.04626	802.4862	2051.0674
"1555262_a_at"	413.90475	439.6409	665.19604	686.9498	341.67365	503.57922	480.1882	312.83228	441.13586	352.2366
"1555263_at"	45.981327	11.212256	67.52649	39.165485	40.77426	42.068768	94.55773	21.89191	37.39485	245.19685
"1555264_a_at"	151.31392	279.88043	146.54924	111.91572	232.24663	525.1621	316.62573	124.1499	76.58856	698.43335
"1555265_at"	68.45458	111.12653	42.029877	41.549248	54.085808	364.58444	171.05478	272.96152	223.6815	152.07457
"1555266_a_at"	3207.1355	3783.386	3005.3313	3536.224	5826.6553	4122.045	3829.407	5636.8794	5938.229	1372.0925
"1555267_at"	742.058	438.41315	1091.0499	843.7327	1584.6525	542.65326	1087.429	286.86575	719.9878	299.71567
"1555268_a_at"	1580.1821	1297.3925	201.5542	1581.7292	2082.5247	1624.5541	1511.0017	707.8089	583.9131	409.1879
"1555269_a_at"	587.2668	1115.8427	741.4655	961.8777	1419.0981	1106.8976	1146.5957	795.1905	822.6564	823.8328
"1555270_a_at"	2833.312	14233.842	2813.0469	3783.21	7035.3467	5513.478	3854.5127	6295.956	10353.776	16400.385
"1555271_a_at"	975.4245	443.16812	1071.154	506.8145	1231.5952	353.1954	1134.8464	253.8335	568.172	404.4054
"1555272_at"	1542.33	2238.5425	1458.2395	939.62445	1632.1632	1453.15	2382.8877	1878.0597	1305.5468	2713.1099
"1555273_at"	295.08908	79.44637	163.69417	506.95255	539.71747	284.05722	44.019558	310.1391	88.40508	591.52814
"1555274_a_at"	1587.2897	1736.1	1095.9059	1636.5547	1904.4556	1193.059	1244.1025	1473.7609	964.7385	1131.2717
"1555275_a_at"	388.9523	220.64459	483.55557	48.47457	704.90686	63.371456	103.35664	50.7735	317.1741	52.031628
"1555277_a_at"	579.8433	108.988205	704.4973	79.10017	1060.9364	237.66547	622.74945	158.66489	78.15805	501.33075
"1555278_a_at"	15327.076	7949.8564	11651.707	15324.959	14547.94	17549.53	12274.841	28221.924	24862.215	8723.271
"1555279_at"	1552.4103	1047.2401	1076.0779	1881.9036	1130.5505	1660.1925	1492.2926	1166.5602	907.5577	1547.9327
"1555281_x_at"	1415.1028	1266.1556	1009.08435	2034.4059	1211.4424	1888.3569	1611.5127	1341.6467	1257.0216	1485.2823
"1555282_a_at"	1280.2163	46.004692	1498.441	888.0075	2376.0103	63.53674	789.0058	76.02093	62.646763	49.87863
"1555284_at"	318.56488	316.02292	676.915	41.509644	419.5802	263.06448	58.486763	327.09518	224.35124	373.69052
"1555286_at"	320.94186	28.836252	267.01	75.08924	53.558838	52.21837	23.295488	23.33649	80.740555	42.55109
"1555288_s_at"	3156.6448	1989.1045	2538.4158	3346.4663	3024.5857	2495.2458	2515.399	2442.0625	2521.5588	2254.825
"1555289_at"	689.71454	355.61386	1135.7169	790.751	840.25995	1125.0973	556.9047	288.46237	899.4602	737.24976
"1555291_at"	204.18738	351.5748	454.838	604.2439	335.6838	57.890816	242.0365	198.3667	190.01195	60.916203
"1555292_at"	2417.617	803.9162	1672.3475	1097.7739	1588.0139	914.5717	1755.7345	1298.865	1013.32227	1195.4062
"1555294_a_at"	1610.995	1800.917	510.48657	1432.0704	2998.268	1582.7964	1501.6323	2363.6504	3227.7021	312.7802
"1555298_a_at"	39.295555	339.3782	159.6901	136.97461	232.42194	311.89645	190.91032	112.3814	241.66162	112.4996
"1555299_s_at"	371.17468	250.2317	520.55316	56.184025	334.86157	361.26978	236.57611	45.3288	179.83336	336.3849
"1555300_a_at"	642.20013	751.3068	557.3345	721.0337	656.81635	438.0701	603.71735	252.8716	429.676	718.38464
"1555301_a_at"	407.3092	348.83893	285.0147	425.65002	637.70276	427.8007	261.617	908.27747	745.0435	399.33325
"1555303_at"	1462.2892	664.34644	1377.8839	529.91614	1387.6531	1386.6782	1118.7179	367.95587	460.48376	1197.6826
"1555304_a_at"	744.878	559.1179	708.9717	916.70337	955.6433	165.0743	762.9383	349.4218	236.3952	1089.5085
"1555305_at"	401.64114	358.84103	711.38727	662.7896	604.6063	471.009	855.94836	185.1633	501.16098	415.61432
"1555306_a_at"	13134.979	1357.7283	6360.379	10796.17	5614.577	11364.932	6605.2812	1247.5052	967.5344	1434.3035
"1555307_at"	281.2175	20.94503	283.1061	68.17328	137.986	161.29895	304.65527	170.68915	152.67253	70.72685
"1555308_at"	667.3466	109.09508	829.9914	776.9356	943.22314	445.0681	614.5323	732.9243	638.0395	861.89685
"1555309_a_at"	45.504448	49.62686	102.37452	46.85508	131.31662	46.685677	147.30643	51.994587	116.09002	27.088335
"1555310_a_at"	6758.8296	2411.5874	7937.2817	8296.216	6415.332	7512.225	6902.539	683.4296	251.92123	11108.4375
"1555311_at"	834.6142	1833.7526	2325.0002	822.31976	967.696	1480.3845	897.241	695.5505	1166.355	1433.72
"1555313_a_at"	1179.0225	206.16841	2327.2666	2428.5745	5934.43	4056.4924	2473.0896	12.64022	190.78976	112.29277
"1555314_at"	478.08066	206.40279	451.85938	156.39789	400.60297	271.55276	130.36769	163.79405	81.44092	240.13332
"1555315_a_at"	175.91924	226.85896	615.1848	266.76083	262.9284	152.81467	124.30749	12.614904	258.74408	137.24365
"1555316_a_at"	701.18304	250.07272	1332.6431	342.95276	260.95923	1033.9698	560.6531	227.54071	544.7648	190.77269
"1555317_at"	40.568066	137.64767	162.01932	122.16722	384.98264	22.484287	59.200554	31.89157	32.57653	103.37852
"1555318_at"	191.18217	198.92531	384.41782	56.973442	139.79805	42.287304	293.5259	182.94565	180.63876	234.83522
"1555319_at"	364.47684	321.0916	844.8819	780.9491	678.62897	489.99164	388.0712	604.93506	592.5426	397.3119
"1555320_a_at"	644.2483	492.09296	596.1318	85.72898	1036.6666	201.30774	578.6292	52.918182	401.95645	237.76938
"1555321_at"	301.162	331.7372	410.23795	196.6427	563.15826	141.79721	234.11871	110.75945	267.22058	1078.1145
"1555322_at"	578.2204	351.95206	1418.5978	388.48773	303.27597	769.23224	77.309	48.402985	435.0477	611.82684
"1555323_at"	504.6904	510.2965	435.0797	334.09637	299.14835	129.96245	405.3659	303.82504	560.30334	763.8695
"1555324_at"	49.474773	226.51274	132.63997	42.773003	150.86449	183.88011	91.4122	139.98964	247.90161	43.550083
"1555325_s_at"	548.85254	712.1703	742.2633	633.12146	773.61	704.5497	540.68036	1001.7439	1083.3619	1380.6837
"1555326_a_at"	2214.575	852.54144	1612.8751	1553.9022	2427.8887	2535.699	2028.753	18556.697	18305.29	3212.3062
"1555330_at"	124.62846	173.23083	189.61751	112.74357	864.43896	663.7323	57.232445	171.99901	301.9839	224.66884
"1555332_at"	65.39913	260.99747	75.25457	710.4426	524.9495	588.36945	122.31858	129.87946	184.03442	29.000154
"1555334_s_at"	5195.1636	9434.548	3557.985	4099.035	4378.657	4823.764	5579.6465	8425.449	8460.821	4618.8545
"1555335_at"	95.08172	474.42337	188.11308	263.5644	143.88708	163.47879	450.91693	49.624462	346.09494	246.17291
"1555336_a_at"	379.61456	117.55856	124.088715	401.27133	162.60333	83.6976	35.420906	101.83331	376.68716	346.36957
"1555337_a_at"	1954.2947	2044.3938	1482.5247	1788.7969	2518.611	1599.0607	1841.6504	2656.2427	3106.5508	1221.9084
"1555338_s_at"	131.15437	145.01228	389.50385	110.835556	58.795856	166.35283	184.98186	80.70409	51.04298	115.99632
"1555339_at"	42.111786	65.016075	47.061802	170.07434	273.0195	62.13911	291.14975	80.67407	38.666374	43.311604
"1555340_x_at"	118.34819	47.76551	74.45783	49.676056	250.29709	88.949646	70.971436	35.23305	93.40285	29.070278
"1555341_at"	42.14724	11.481489	24.877022	14.607942	30.198866	177.084	24.84388	17.106216	33.98739	166.5736
"1555342_a_at"	45.24177	32.477833	46.892307	55.39635	65.29292	59.92558	80.6608	42.447144	249.55962	36.466442
"1555343_at"	112.86631	79.53232	318.4061	58.19237	267.99332	196.4241	79.17459	102.064735	182.74747	83.18241
"1555344_at"	490.0985	158.7514	743.02405	63.49401	753.4635	39.97245	936.9541	48.779057	77.15598	188.30128
"1555345_at"	146.55124	98.69709	49.701443	37.490154	31.57058	31.147493	110.15146	37.16966	117.2988	46.205948
"1555346_at"	57.6295	219.2781	342.05258	171.65475	430.71753	78.90502	157.74446	277.61047	315.60638	152.17636
"1555347_at"	540.76306	516.4896	298.85165	394.4416	424.37573	566.3234	264.7769	651.77313	582.1756	658.43054
"1555348_at"	1493.1859	1112.8992	1231.0624	1181.0447	2108.1917	1950.008	1587.273	669.5156	1324.128	937.47003
"1555349_a_at"	1700.1023	801.089	1511.3997	1073.9005	153.38426	1035.6039	1970.8787	267.69592	87.53634	122.31978
"1555350_at"	746.8585	368.7393	300.90997	478.16318	1203.3284	837.2825	521.349	676.59033	805.47894	379.64453
"1555351_s_at"	727.8654	841.52405	817.142	1088.3947	1375.436	1214.8442	1587.3998	1242.731	1544.1898	387.38208
"1555352_at"	198.97653	146.29004	121.247284	64.74104	361.63824	66.00579	403.80338	342.2447	62.720524	129.79228
"1555353_at"	479.69962	246.0312	570.3357	100.223625	1043.2302	239.92165	394.5909	457.56216	378.6038	443.44186
"1555355_a_at"	319.16235	405.2127	231.69101	387.665	242.42407	86.189445	142.31262	5114.7466	5900.926	164.4315
"1555356_a_at"	278.0452	252.43068	294.05103	507.8078	205.03612	277.77167	336.6341	128.04887	160.33176	153.8231
"1555357_at"	226.78426	15.649642	319.26276	10.217414	13.899047	342.9578	20.660854	21.077402	122.86097	63.096256
"1555358_a_at"	5191.466	2799.8267	1354.5013	2889.0884	1663.1099	1980.9183	3603.8223	2552.0115	2716.16	5215.845
"1555359_at"	1364.8599	1069.914	835.8944	496.2395	1585.2094	731.97675	846.1333	1360.2465	1448.7759	748.6634
"1555360_a_at"	2809.1956	1753.0402	1967.2926	3328.794	3300.9492	3270.8352	2151.3274	5973.075	3672.0618	1563.4363
"1555363_s_at"	1624.1378	3974.5488	2352.959	3075.326	1679.7476	896.0331	2501.817	47.21489	79.69665	5604.136
"1555364_at"	33.76192	109.016304	438.90286	212.77705	328.49698	191.48431	131.84988	167.45604	283.93524	183.55533
"1555365_x_at"	192.84576	262.0716	292.69797	22.619902	94.84645	34.525864	327.7831	163.83423	422.3578	382.1133
"1555366_at"	478.73215	47.15053	75.451645	102.41707	121.66085	389.25586	102.82588	27.930336	393.9042	209.52435
"1555367_at"	41.999397	206.56512	437.64316	314.96194	714.25665	336.8941	351.93866	287.40952	157.97444	57.89915
"1555368_x_at"	901.2027	620.73566	962.3016	909.345	511.70303	763.6606	1261.8129	107.76882	705.89374	519.49023
"1555369_at"	60.316685	51.31567	212.50656	309.64603	295.0722	150.98676	103.29203	84.58971	56.697567	77.83323
"1555370_a_at"	3086.9424	12221.547	4377.2607	17282.154	7477.5596	7472.119	5618.7314	348.88983	565.81	23671.834
"1555371_at"	47.812653	118.57741	651.62585	222.24905	930.0669	86.66776	884.70416	35.92005	394.66684	30.92589
"1555372_at"	3084.0483	4156.762	2594.6062	1738.5199	2678.333	2794.3552	1786.7656	2548.6458	2108.0432	3090.4412
"1555373_at"	526.3261	495.5638	641.6683	300.74542	237.3568	137.90738	806.4952	196.97353	557.00024	674.49713
"1555374_at"	1476.8689	764.0194	1021.38153	1173.289	1272.525	1383.011	1941.632	833.5082	995.8995	1196.2426
"1555375_at"	88.318115	15.615605	138.92165	281.4763	294.99472	455.06122	54.52056	243.26508	10.227858	13.584424
"1555377_at"	421.2726	553.6808	958.1782	146.35571	294.36954	714.6453	621.55005	283.0359	317.9972	151.53423
"1555378_at"	200.28972	372.33432	157.40903	841.7564	95.920006	169.2619	229.19016	1353.0688	1121.6565	132.73653
"1555379_at"	349.69507	57.626427	101.95924	115.62154	201.36096	80.02679	116.67204	85.98048	183.80385	44.30448
"1555380_at"	643.09845	657.1373	643.2991	73.31007	1369.7561	710.4007	1018.7488	290.77948	273.5316	255.56502
"1555382_at"	58.41623	52.200172	170.89113	121.50602	129.47137	248.45049	232.21973	105.04748	7.932992	105.72199
"1555383_a_at"	103.09066	74.39218	311.69138	106.96594	466.63455	394.71848	388.48904	103.53459	42.13994	230.50757
"1555384_a_at"	2946.5547	5205.135	2235.5173	2527.4126	1729.4586	2846.6074	2103.663	4322.408	4145.6616	2197.8188
"1555385_at"	1668.3052	1239.2114	2987.0454	2807.8542	4192.936	4232.987	2683.0625	572.8314	696.99835	939.00195
"1555387_at"	1067.8114	692.1609	1309.3049	908.7159	1108.6287	1143.1428	728.73663	607.322	807.0608	665.5911
"1555388_s_at"	1905.8678	1982.4722	964.39923	1331.4432	753.6421	1027.6525	1111.9779	1900.8179	1374.1078	2842.6357
"1555390_at"	668.5482	480.4461	1178.943	756.86115	844.7131	559.11993	859.0442	1166.0491	1546.9751	723.1334
"1555391_a_at"	331.03592	37.934315	432.69116	445.8783	235.15585	444.7461	441.35388	25.226627	16.847239	439.3506
"1555392_at"	155.40509	27.242794	132.75394	61.19254	134.0028	67.88374	66.35966	201.45778	30.815979	161.19653
"1555393_s_at"	1017.1902	548.5583	767.8191	798.9227	1141.3262	270.20584	1041.59	336.4387	324.5973	714.1621
"1555394_at"	38.612324	205.98314	198.09027	325.17325	370.88376	83.140076	348.13123	148.22836	108.761955	263.86984
"1555395_at"	66.9231	224.54028	233.7347	97.28208	153.0296	463.0284	470.85507	463.40695	136.59645	509.98044
"1555396_s_at"	64.345146	67.20944	87.58333	144.68532	38.48678	82.05595	35.89048	49.83381	67.14861	69.658356
"1555397_at"	350.2942	222.16328	114.81968	464.8577	637.7171	296.55417	196.99294	32.06472	200.26486	276.76526
"1555399_a_at"	1966.1666	1159.0757	1469.5211	2543.4504	2955.4326	1593.6083	2163.0347	1241.7793	1441.6635	1417.627
"1555400_at"	354.5064	217.34448	491.1545	493.98352	338.64386	132.3653	355.4029	384.73502	456.99167	370.37054
"1555401_at"	252.01497	556.5393	164.10544	242.40878	667.37225	645.29706	561.47815	508.7205	287.54697	426.75497
"1555403_a_at"	228.99162	176.01715	141.34697	199.2544	138.9588	358.406	100.60031	110.4399	215.91843	141.95036
"1555404_a_at"	289.08627	388.49063	176.1458	271.36816	220.7278	385.905	421.74286	242.61958	329.56662	309.55722
"1555405_at"	225.99203	329.44415	284.20602	345.3323	102.44077	51.558483	142.38432	219.97543	367.95737	273.88586
"1555407_s_at"	484.40482	250.45508	599.9472	354.358	776.0952	1107.859	535.72894	420.53864	605.5274	350.3545
"1555408_at"	1572.8726	827.30414	1451.3125	593.54083	2042.4012	1201.7452	1472.3925	396.40894	472.3107	792.4914
"1555409_a_at"	1515.3096	900.978	506.2035	1013.40485	1554.2434	1192.0094	1277.0084	666.61	423.76892	413.67618
"1555410_at"	555.15894	885.81995	686.95355	555.7143	614.0274	647.9952	834.9763	528.11835	759.52106	98.646034
"1555411_a_at"	3929.4177	5460.8135	2971.441	3540.6648	4896.183	2791.8784	1552.6307	7189.5444	7271.0615	5800.9956
"1555412_at"	15.3820715	23.03759	17.961546	448.09155	29.813503	21.492704	26.75947	22.03052	34.34999	12.423081
"1555413_s_at"	100.83887	49.277042	427.37073	211.43965	349.83823	459.35422	76.81508	43.014053	77.80908	49.806175
"1555415_at"	107.534134	87.836136	593.7958	119.267746	86.76869	110.18845	102.971954	214.16216	177.54344	243.89777
"1555416_a_at"	78.32683	326.09158	210.73044	70.417984	99.61486	368.82635	499.59448	212.27687	384.1751	112.46557
"1555417_a_at"	246.84053	27.630003	285.56964	90.05484	168.106	540.0956	294.54138	136.99782	180.952	65.077095
"1555419_a_at"	23736.525	25788.434	22386.85	19611.734	28574.574	25501.508	29637.744	5850.125	5838.071	55236.492
"1555420_a_at"	869.63525	1061.504	960.2063	1584.4026	983.51117	795.1146	1110.213	1045.3448	1002.30145	665.05304
"1555421_at"	240.04422	254.70708	354.6512	15.079523	60.70951	36.52182	135.0711	59.583977	25.233677	170.63129
"1555423_at"	461.72247	520.9119	144.1889	611.5129	235.02046	630.8893	296.83496	397.4294	319.37677	381.3633
"1555425_x_at"	419.19104	116.28465	145.99294	132.93404	348.1407	539.8304	221.52626	377.8082	103.37691	239.64534
"1555426_a_at"	3483.6196	3711.5698	3052.3765	3035.8416	4005.1968	4370.6514	3131.0667	2913.849	5181.243	1781.4453
"1555427_s_at"	1568.8306	1710.4852	1031.2502	1556.6565	1476.3055	1334.0675	832.07623	7961.982	7296.122	1166.038
"1555429_at"	661.26465	365.90842	131.90503	84.924835	81.320786	71.56685	130.47261	298.89127	681.44745	261.751
"1555430_at"	88.47547	59.746296	32.461567	33.8599	58.267097	52.35093	96.44688	70.94748	19.02237	17.8354
"1555431_a_at"	164.83226	11.53764	94.93636	37.992985	38.58044	216.7969	184.43964	34.018524	371.856	19.438707
"1555433_at"	440.9743	348.43344	658.6117	189.09772	253.9588	470.334	380.3494	73.57964	744.98834	348.07388
"1555434_a_at"	957.7397	882.9827	1283.945	980.0136	1804.1901	1429.0271	988.89923	5362.7554	8413.509	825.13025
"1555435_at"	340.5143	255.51262	691.53015	456.0044	698.6736	770.69977	475.1155	153.51836	136.02502	251.00967
"1555436_a_at"	1260.4813	1178.8151	1458.8507	1189.4362	1452.4568	1746.3448	959.9595	1603.1066	1181.9625	2659.791
"1555437_at"	989.25146	475.2833	839.09204	1129.0797	958.90985	1669.9119	1259.6356	786.8098	722.0618	621.99835
"1555439_at"	859.1335	729.6427	96.68282	308.17078	146.01164	586.7717	536.77734	668.7548	549.5465	1462.2959
"1555441_at"	991.6842	125.70557	473.91382	255.73692	572.2981	416.4138	695.8799	41.882015	320.5253	233.20914
"1555443_at"	843.71173	305.63513	240.75644	888.4182	316.1047	264.10654	660.60455	86.88285	156.04832	105.624886
"1555444_a_at"	29.720833	19.798655	116.59438	19.123892	50.542595	30.38757	34.71608	18.236904	25.810118	22.641989
"1555445_at"	59.528248	66.8399	414.07538	75.905685	133.1233	49.583626	110.812546	67.42067	80.78213	38.320484
"1555446_s_at"	1044.8606	1946.0131	1377.9453	701.97723	1386.713	1296.2212	1077.1932	2054.2085	1633.5781	1701.1466
"1555447_at"	864.84436	624.7615	1027.597	622.68976	1177.563	894.4917	1184.9662	551.5147	937.49365	894.0683
"1555448_at"	531.6846	801.4679	653.37146	389.13348	699.6645	686.82916	540.902	1039.7565	579.59753	560.01
"1555450_a_at"	1129.2959	1257.3917	1473.607	1494.2281	489.3268	1008.1732	1309.3063	1337.8208	1509.4379	2220.8403
"1555452_at"	1514.4674	1002.8304	1182.7714	1327.8746	1299.2507	1505.6396	2016.6465	964.78906	1371.1666	1253.8003
"1555454_at"	42.148552	30.041954	86.69771	21.847517	33.71075	257.29297	37.215527	136.80086	32.155544	35.98944
"1555456_at"	476.851	331.79147	74.871956	235.02971	500.57944	213.0748	231.05177	52.716965	60.06058	275.10297
"1555457_at"	83.32966	64.04387	88.90122	209.22093	82.043205	111.07732	43.004433	226.99155	37.99959	84.10467
"1555460_a_at"	6728.3784	16398.762	4638.114	7505.3647	7995.377	5953.963	7174.9297	4820.3	5388.5293	10066.021
"1555461_at"	1380.8722	2415.4377	1185.8657	1491.2078	1224.9681	1717.1573	813.98413	1358.4744	1554.9626	3749.3545
"1555462_at"	223.04625	100.472336	1724.6527	880.27936	561.69495	146.52922	1101.9524	207.12764	281.05347	725.7668
"1555463_a_at"	307.04727	372.12393	56.271065	108.48499	501.17062	264.27063	205.96576	388.5509	537.90204	314.78262
"1555464_at"	765.7016	455.57126	730.64044	707.1787	1212.3469	1143.1398	1082.3605	678.6856	515.12994	384.44675
"1555465_at"	385.2378	296.90176	590.9627	795.0594	1498.1251	780.4997	327.26294	614.45605	424.25217	109.40866
"1555467_a_at"	2122.9893	1481.9292	1272.3104	2523.1506	1206.3202	2845.8484	2049.1555	4057.0803	4128.4355	1519.7635
"1555468_at"	713.5549	688.89264	318.3476	514.0042	673.4707	681.10297	700.2835	269.9008	919.76447	76.64189
"1555469_a_at"	3395.0881	2210.2114	3234.8086	3146.4656	5682.4653	2991.0515	3370.8486	1407.894	1615.89	1754.556
"1555470_a_at"	1802.3505	1580.2942	2181.3147	1540.6583	2151.9668	906.56476	1444.605	2077.518	2915.868	1224.6133
"1555471_a_at"	8972.907	9341.2705	6527.6445	12459.817	10411.05	8338.695	10908.44	1357.4797	1241.4626	7435.491
"1555472_at"	56.573624	327.83353	150.25676	71.91976	129.94437	88.13095	74.2269	47.41633	186.98708	34.98356
"1555474_at"	1154.1688	1301.2958	1400.4921	1401.5334	1429.871	943.167	1105.4402	528.86224	777.4518	958.85706
"1555475_x_at"	370.45258	541.2125	409.2059	497.65433	1914.301	693.21106	262.42062	190.4499	180.69595	367.96085
"1555476_at"	771.368	340.9358	614.9289	386.03543	477.43222	221.24883	340.30743	385.2174	228.67441	388.3746
"1555478_at"	732.8209	469.1707	592.8129	214.63396	1490.8235	592.9035	972.1215	870.55054	663.5322	833.8769
"1555480_a_at"	703.5907	664.01276	458.95685	860.5741	1118.5444	942.2475	690.13776	6885.0	6910.825	823.36273
"1555483_x_at"	92.608444	405.60892	166.6957	1130.3049	778.80383	816.8407	858.9456	1412.3094	1690.9578	397.92563
"1555485_s_at"	585.60205	385.68085	591.7171	86.44347	741.08704	418.50317	69.55165	375.82318	189.48924	534.98303
"1555486_a_at"	1163.7275	1044.4241	1936.2045	1194.2886	1349.4845	1032.3737	1360.9742	4036.653	4135.1904	812.9532
"1555487_a_at"	4162.1655	10698.309	4360.5806	4101.7837	4194.48	3696.935	4404.546	1357.9021	1617.5876	3843.1838
"1555488_at"	635.8018	260.74484	522.4428	170.57494	425.42926	347.6135	105.750015	108.374374	387.14868	578.1378
"1555489_at"	935.01215	435.9112	552.40686	652.3853	647.34204	483.3578	550.5988	474.5406	311.32602	763.99146
"1555490_s_at"	41.66807	56.43721	48.028503	45.521202	65.5438	131.75397	268.31927	230.14122	169.87798	122.5959
"1555491_a_at"	2862.5305	3460.6235	2721.951	3324.3552	3133.167	2173.4287	3518.4675	1988.0938	1672.844	2544.8318
"1555492_a_at"	27.548708	33.283524	31.51851	29.59711	124.284454	27.070642	35.988445	16.570875	213.27568	26.747618
"1555495_a_at"	7230.3535	7891.2427	9749.153	7486.031	8094.209	8439.271	7690.0283	7409.639	6213.3887	5729.687
"1555497_a_at"	1105.355	745.3165	1139.773	1113.8082	952.5901	570.45465	1891.1844	366.80597	344.88623	501.3705
"1555498_at"	38.114017	115.792816	65.28387	27.322807	79.0557	23.100487	42.6371	89.14401	36.051308	114.67674
"1555499_a_at"	220.71019	814.4296	908.10767	1045.4261	1181.9719	1395.1942	1486.6868	1076.0798	1225.9005	736.6163
"1555500_s_at"	461.0815	702.04675	291.80844	847.386	429.9442	840.1541	430.86716	2007.8696	3106.382	53.26948
"1555501_s_at"	1460.3351	1630.5813	989.9561	1476.8479	2074.2532	1603.3315	1302.577	2576.6458	2157.5195	1397.4835
"1555502_at"	186.89659	38.131012	388.6276	97.06101	98.5523	473.3404	239.47372	101.87014	142.3867	181.74927
"1555503_a_at"	1504.7728	842.2239	1533.444	1873.8783	3277.2036	1643.8925	1885.9026	774.7214	1016.70355	629.48785
"1555504_at"	10.682189	15.8533325	14.021583	93.40163	18.985561	24.151615	22.508907	14.498033	11.98203	13.091886
"1555505_a_at"	374.23364	64.71777	563.03705	550.3899	595.04474	150.5565	103.51085	37.88789	53.280663	379.17575
"1555509_a_at"	73.253044	86.810326	426.95847	71.51566	92.011	46.86001	317.85852	59.222637	60.908707	31.38669
"1555510_at"	29.2359	26.338415	75.988144	112.49035	81.94927	142.61832	45.439117	21.935673	193.519	33.39861
"1555513_at"	198.81512	12.13816	612.41113	220.44069	439.51404	215.40955	28.87792	78.731544	51.166332	344.77405
"1555514_a_at"	3588.8757	4201.515	2670.096	2862.3381	3800.7156	3270.3901	2145.3826	3917.8625	3202.5818	3496.7424
"1555515_a_at"	719.3098	794.7745	44.57771	197.33138	877.2593	186.6612	250.11398	1197.2002	1667.3572	78.22179
"1555516_at"	378.72137	396.9198	627.6634	533.60754	85.39659	581.87805	653.0995	149.68904	446.5286	414.3149
"1555517_at"	38.831623	16.427887	472.62894	59.822414	46.82819	101.357445	21.10897	252.78511	37.442394	360.1949
"1555519_at"	27.84854	180.78534	70.166565	239.00897	50.840355	29.445898	34.963615	12.045779	222.75798	46.03046
"1555520_at"	618.85095	608.93097	822.66974	800.6822	830.20734	605.6065	460.1363	373.76413	669.8982	526.424
"1555522_s_at"	3395.5574	2850.1023	2674.9082	2802.5933	2342.1917	3554.0254	2837.5942	6575.8447	4481.914	1745.1727
"1555523_a_at"	1529.6211	830.1965	1301.1132	1590.0536	1720.3192	1831.8097	1955.4424	1236.6182	1559.3405	1110.1809
"1555526_a_at"	636.547	714.8991	951.51105	2170.4243	1233.8785	975.5675	772.35736	1112.7314	1158.2517	411.1399
"1555527_at"	14.201007	161.15599	75.11514	38.17257	24.848028	17.259993	38.720833	8.720715	31.596909	189.93285
"1555529_at"	697.47894	533.32733	1227.3052	876.9891	903.7564	1323.9338	1403.8108	341.32535	958.7336	838.3939
"1555533_at"	28.134247	65.02453	34.354424	50.037853	31.398012	37.3724	31.036499	162.49626	17.573238	74.16575
"1555535_at"	40.576496	61.578682	161.05455	172.4539	122.11536	174.06432	109.148285	204.4213	49.456863	70.07208
"1555536_at"	674.2038	58.177372	536.39136	123.98004	352.94208	312.97104	276.459	3752.7603	5777.2373	540.3462
"1555538_s_at"	227.49725	375.6015	119.363	37.135296	315.53107	28.039886	358.96225	312.58817	244.90576	266.16968
"1555539_at"	79.73246	268.11346	75.37662	152.91306	139.87863	99.59732	104.60806	303.5678	85.29817	267.07803
"1555540_at"	38.2894	71.01952	135.80223	150.99174	138.03238	70.4213	62.116318	75.72506	39.46637	103.854195
"1555542_at"	454.6963	152.95128	54.816998	95.697914	127.62517	151.39581	226.91833	1321.5479	1408.1324	41.784966
"1555543_a_at"	4203.0034	2557.247	3290.6667	4172.0283	3776.96	5521.8994	3641.9902	3969.151	3105.0723	5464.8535
"1555544_a_at"	1480.5222	386.13315	1539.851	680.6508	2316.8782	2551.71	2091.8125	148.349	167.50978	3511.2134
"1555545_at"	352.68176	45.287342	569.54114	434.54953	355.9313	452.40466	462.37036	110.70616	186.63985	293.30063
"1555546_a_at"	610.3593	284.49677	110.86019	511.30972	804.9557	647.56055	718.18414	90.11007	387.78604	244.1569
"1555547_at"	104.75878	231.3734	273.93576	325.76114	101.158745	271.5128	77.8952	166.09543	399.67282	282.59042
"1555548_at"	326.6409	173.41507	244.50519	466.78717	216.56969	710.462	210.71286	351.46072	257.55005	220.84473
"1555550_at"	300.00015	109.72401	231.05603	806.2718	625.5965	126.8551	207.0456	732.1902	104.65677	75.34841
"1555551_at"	228.77519	361.70865	340.48575	74.41089	400.25992	159.3623	401.27005	73.22719	74.84801	108.38999
"1555553_a_at"	226.47646	165.5293	121.836006	130.52585	288.73032	175.1856	295.96698	195.77394	233.50473	507.6192
"1555554_at"	390.48062	648.99	1411.0312	1052.6912	1672.2267	1397.1018	1555.5071	392.06598	479.14233	932.08545
"1555555_at"	213.0834	154.46852	58.22296	292.9188	430.56808	361.83093	23.158913	184.59657	246.47118	182.76688
"1555557_a_at"	543.4047	296.34393	219.06046	345.07114	273.5981	226.13571	249.1934	373.02686	41.14528	161.9237
"1555558_at"	46.59247	50.847965	108.152855	27.852184	108.32411	22.129013	37.9507	53.703827	63.47482	40.0454
"1555559_s_at"	219.9279	286.29852	135.70709	53.723434	881.2675	376.27878	142.84761	905.9302	723.12177	254.63113
"1555560_at"	216.09547	6.1824937	15.5395565	15.306071	35.615833	38.56208	194.55194	29.9577	144.87486	311.8346
"1555561_a_at"	630.05676	1988.1001	981.0329	551.91864	472.49402	847.51404	867.185	918.0128	988.4276	2114.174
"1555562_a_at"	1220.5636	1126.7373	865.9797	500.2691	1187.9238	854.096	1044.1871	695.42267	758.67	858.9853
"1555564_a_at"	374.04013	728.8832	280.14734	252.6279	218.97147	519.8232	299.13538	1078.6833	451.41663	350.16034
"1555565_s_at"	3947.9373	2880.122	3839.085	2577.7207	4182.999	3777.2693	4450.769	4841.322	5077.718	2625.6338
"1555567_s_at"	135.4546	85.61932	133.08798	46.33856	159.62819	131.64932	271.42798	58.029182	81.66996	35.776066
"1555568_at"	879.0823	521.90405	936.2334	80.66556	646.49255	342.69037	853.4774	338.8379	413.33276	711.6285
"1555569_a_at"	423.95032	656.5991	385.47867	146.59856	884.9212	577.29584	149.31369	553.1279	482.51517	50.546658
"1555571_at"	771.4464	302.5587	643.03955	393.66116	1018.6424	439.02402	254.62836	129.7005	31.163198	381.42496
"1555572_at"	30.253187	22.329477	126.60264	30.233685	413.75912	61.84735	210.20584	138.9043	29.879879	42.868607
"1555573_at"	401.13925	103.91044	622.8656	303.07516	346.11758	206.11545	277.17984	553.18567	289.83646	488.34198
"1555575_a_at"	35230.086	46655.65	31007.666	27013.914	26936.086	29094.898	32314.445	32181.54	34348.3	50745.86
"1555578_at"	569.70795	282.5223	844.83813	581.7249	493.01065	914.488	593.0081	290.72125	363.02594	1882.5941
"1555579_s_at"	10676.805	4806.495	7472.7017	6731.9863	4112.6143	11212.198	9313.15	3847.9746	4581.922	27159.24
"1555580_at"	1121.9185	700.3651	654.0858	715.96545	691.00055	746.6187	622.27606	1071.6674	465.71512	185.39658
"1555581_a_at"	22.147432	30.469723	127.54121	91.06467	102.97529	98.350914	257.13077	49.31314	44.464397	98.15983
"1555585_a_at"	56.678783	78.73876	217.14876	42.25635	121.659325	159.17998	186.23564	83.84605	178.63057	43.78217
"1555586_at"	169.80215	335.3661	1084.775	574.35645	956.34	154.03778	482.02817	233.68991	336.81638	289.2303
"1555587_at"	160.75043	133.90118	187.56206	92.25853	247.01535	166.92358	169.73413	144.56465	127.519394	149.17513
"1555590_a_at"	116.410355	119.48054	241.18867	166.0768	324.5352	256.2392	195.61697	116.99644	247.1413	174.89812
"1555591_at"	215.87733	330.4207	109.38107	582.93634	250.79262	556.30145	136.36491	530.451	154.21423	321.29654
"1555594_a_at"	1267.3273	2103.4436	1710.7576	1046.4006	1299.6832	1154.2689	1789.428	4722.327	5803.384	836.93207
"1555595_at"	489.70016	1135.0713	121.00466	882.032	450.08923	651.07477	714.6546	712.73126	400.40335	532.8104
"1555598_a_at"	714.92737	725.7279	612.9764	794.5164	1111.1309	1430.7966	889.5186	536.4342	540.01636	532.0363
"1555600_s_at"	303.5802	7072.9707	148.19598	605.65265	594.6661	132.35666	57.74734	263.71143	146.8708	311.08215
"1555601_at"	27.395176	50.935047	16.53041	32.658703	24.165037	26.568357	196.53197	16.179203	24.48049	17.78518
"1555602_a_at"	70.7783	103.35743	415.8544	5350.247	340.32596	2869.9778	167.41934	25.652098	23.316324	551.8905
"1555603_at"	256.1626	356.2495	166.27509	22.847633	209.17462	405.5368	134.63358	31.987398	44.477406	201.56502
"1555605_x_at"	62.33957	60.83415	105.39464	56.916286	77.50477	232.04341	157.96811	127.16003	257.84296	27.379435
"1555606_a_at"	1784.0038	1798.0597	1924.2927	2275.1868	2880.8064	1889.921	2580.4387	485.2611	1025.5979	1100.3523
"1555608_at"	1230.4066	382.31573	204.66379	1478.2897	684.69696	645.5385	457.8209	438.84946	203.52261	1727.7556
"1555609_a_at"	1879.3606	1864.7876	1733.6213	1329.5479	2576.4978	2653.7773	1720.0646	1524.8887	1162.1455	464.93652
"1555610_at"	61.691883	111.8472	37.268223	149.2415	12.020029	40.019176	178.13824	6.4044566	13.241594	103.37703
"1555611_s_at"	2901.914	2720.0781	1812.2811	2211.1863	3418.3188	2502.437	2303.244	3427.9033	3363.5378	1588.9739
"1555612_s_at"	748.32153	526.7578	425.32153	323.4676	865.1804	1068.0946	955.426	404.08862	797.7868	57.43493
"1555613_a_at"	77.54366	337.96722	42.118553	349.11304	109.61285	56.33726	38.981876	23.389336	31.029646	176.5328
"1555614_at"	112.43807	487.9062	646.4143	174.82605	307.85474	412.78735	233.6024	351.38846	267.14966	368.10306
"1555616_at"	1481.0686	1748.0527	4727.52	1258.2756	2950.4417	1055.0505	4065.9016	29.916426	546.7011	1864.1598
"1555617_x_at"	1671.0037	1956.4736	3489.25	1798.2062	3214.858	2028.1831	3601.3574	447.12518	989.76605	1733.1268
"1555618_s_at"	5159.8804	7823.435	4243.4707	6095.9917	7179.095	6045.893	5488.456	24382.62	19545.1	3466.209
"1555620_a_at"	314.60062	305.18112	257.48004	286.0046	311.39035	294.73532	264.81412	380.36807	241.17625	272.2384
"1555623_at"	173.59784	176.95627	470.45026	206.6429	47.529556	242.32893	316.74527	22.942644	24.970968	12.6254425
"1555624_a_at"	315.43488	480.10287	653.3311	541.6859	448.6267	192.3186	30.05576	810.00476	1790.1185	274.81754
"1555626_a_at"	605.005	47.323265	332.87546	792.4134	535.548	485.74115	815.47516	151.33293	136.43506	342.18033
"1555627_s_at"	1010.7987	840.8843	1148.0029	1322.8292	1313.2802	1283.1953	1370.1722	533.2584	130.27377	755.10333
"1555628_a_at"	546.57367	65.00872	130.32114	103.34383	87.58233	72.46366	235.62042	152.07957	438.95264	370.81662
"1555629_at"	113.01239	57.24396	152.25365	82.450264	130.42467	119.46639	101.426476	81.37585	79.95679	129.61578
"1555630_a_at"	2498.4312	1470.8595	820.96765	2317.7148	759.8834	1329.9568	2829.047	40236.016	41878.93	690.98285
"1555631_at"	365.34024	187.46825	300.25146	103.036766	181.3665	583.24146	224.11542	84.808014	134.39415	88.248604
"1555632_at"	1060.477	1072.2587	1915.6864	1254.0548	1447.4928	1152.4894	1928.4536	845.09906	801.38257	868.6166
"1555634_a_at"	650.60834	477.72995	1798.2509	875.8865	1402.5656	1341.1167	1191.5194	809.35284	994.7359	973.7028
"1555636_at"	282.93243	69.678986	272.50247	172.04268	476.40857	427.65378	400.18396	87.4777	130.14276	152.42152
"1555638_a_at"	1119.6195	525.41614	619.8008	464.74988	1466.0316	742.91797	1257.0212	265.7611	54.73695	267.31772
"1555639_a_at"	1351.6412	1238.6318	1271.5604	1202.7604	1868.3324	1639.5093	1180.2058	3006.7168	2700.7332	542.6805
"1555640_at"	41.38326	68.57027	64.1303	180.47368	150.17578	257.9339	72.18792	37.30621	27.483257	18.400549
"1555643_s_at"	343.29242	371.09933	412.98007	517.68176	875.5526	493.70837	581.5952	253.79926	252.84511	178.53543
"1555645_at"	171.09357	92.66573	129.41354	126.17395	205.68855	106.84763	174.95668	55.66354	168.47174	71.206345
"1555646_at"	131.06415	18.39079	254.68005	123.07369	74.74301	41.235725	130.56671	63.760532	81.07579	72.97108
"1555647_a_at"	40.53788	129.46872	401.241	62.660603	305.76453	99.00923	423.88983	26.954306	402.25522	115.89814
"1555648_at"	204.51886	84.53336	135.70302	197.88405	192.8582	247.19579	219.7742	60.029736	93.89849	48.844524
"1555650_at"	551.8436	448.04855	193.63469	746.6423	1179.5908	637.12805	1081.705	675.11847	948.80524	614.18805
"1555651_at"	378.0218	574.0653	630.24884	169.20888	367.3482	444.91193	429.9448	210.8971	507.45282	296.52823
"1555653_at"	176809.9	129768.086	170809.8	146599.78	193379.2	141851.52	176224.17	35557.957	45398.7	123976.195
"1555655_at"	63.584927	34.782482	61.218502	45.060154	55.063183	54.49472	118.91392	35.350666	36.37104	38.123695
"1555656_at"	1317.111	379.41806	472.6825	1111.5939	1612.6727	679.1352	2954.9617	505.30725	569.31586	488.6943
"1555659_a_at"	359.05203	288.09018	473.20242	62.367054	98.223595	506.702	736.7968	85.54316	387.23233	255.58899
"1555661_at"	136.04832	364.056	111.07613	341.1794	918.7646	58.482353	181.84784	406.64954	736.3751	474.61853
"1555662_s_at"	80.8971	17.820797	37.0548	132.91992	125.042305	45.776283	84.42849	57.0445	378.52945	303.04254
"1555664_at"	739.0323	235.9307	158.37788	228.54834	656.5199	364.677	449.37927	44.973057	156.03575	98.04469
"1555665_at"	51.611637	27.393415	63.123913	36.020535	55.72604	90.95059	71.71544	74.137375	49.210583	20.303352
"1555666_at"	389.50714	74.89787	85.35321	56.481647	63.485374	484.2094	155.08844	81.870705	207.54398	28.591042
"1555668_a_at"	644.09076	517.8925	677.00226	686.0187	992.26526	499.68216	617.84076	385.6782	291.78754	578.59204
"1555671_at"	555.1784	309.65314	704.9608	750.3527	732.9705	1044.1002	333.1512	183.52316	352.75742	581.18774
"1555673_at"	91.56115	606.2248	491.2284	203.41263	107.62778	557.80237	477.78424	355.76154	632.9891	315.8795
"1555675_at"	405.30972	253.93741	402.2011	674.8436	271.265	279.91693	202.28038	552.14685	1032.128	216.29129
"1555676_s_at"	148.94843	52.913982	374.4206	96.88604	46.6421	200.0294	318.02222	151.61728	54.971462	151.2032
"1555677_s_at"	53.460938	112.46102	57.65641	322.382	250.24306	443.43094	219.6579	569.1999	847.416	77.68996
"1555678_at"	129.48845	323.43964	269.02975	187.68263	362.29828	671.1328	166.49744	153.23734	58.51271	205.30244
"1555679_a_at"	1909.8751	2131.5837	1924.1439	1088.0239	2161.1987	1407.0033	1733.6537	2294.7058	2178.9915	1454.3717
"1555680_a_at"	296.02347	465.7064	296.5094	107.43578	157.53119	80.44526	348.9631	989.9828	2011.1855	71.74346
"1555681_at"	721.18976	662.31146	955.6831	351.52136	1108.8899	374.11557	827.3451	308.76343	802.99774	918.7623
"1555682_at"	515.6105	141.16272	129.06062	88.72923	386.53983	265.12585	641.7807	39.29791	108.18867	155.9783
"1555685_at"	338.09006	248.23505	194.40477	301.0	265.24036	709.2098	60.756016	299.76248	108.811485	297.9056
"1555687_a_at"	49.992676	134.38516	56.19991	19.768814	190.8519	45.29022	34.00939	54.876026	429.70584	36.153698
"1555688_s_at"	69.46925	177.83803	112.01682	59.182365	204.56915	100.78895	168.19453	382.41083	333.54196	204.44157
"1555689_at"	23.426434	184.51698	231.88461	41.961666	274.66418	47.63494	146.94576	12.610099	10.242795	19.278122
"1555691_a_at"	256.19055	476.40466	1418.9958	726.8005	706.4196	327.67316	280.739	167.85059	83.082664	487.84735
"1555692_at"	52.28861	26.851728	153.59276	34.50188	89.282005	27.162874	66.69229	30.833069	18.559639	24.759945
"1555694_a_at"	574.37396	85.83119	961.88885	236.59499	592.2901	310.3428	714.4347	582.6055	759.2676	131.52243
"1555695_a_at"	125.15038	95.02373	106.28647	189.78139	197.16182	167.30911	338.54913	86.84098	170.50659	278.9721
"1555697_at"	428.3367	408.9092	571.0196	1148.5155	1618.7462	1374.9955	558.5863	222.15645	1098.2854	880.7397
"1555702_a_at"	1929.327	574.46326	1823.8574	1732.1241	2523.0793	1843.4779	2184.311	1357.4299	1905.257	1249.9138
"1555703_at"	582.94037	324.8794	1371.9652	986.6086	1362.4604	810.1886	1047.8876	479.70972	239.7887	68.49173
"1555704_at"	1014.2802	600.58575	1135.0542	1129.1276	1637.755	1023.4439	838.8625	814.3726	847.0837	913.17944
"1555705_a_at"	1452.4325	2144.1167	280.8709	224.41011	322.7242	390.47385	1407.0112	7280.244	7326.6963	205.57681
"1555707_at"	134.01305	691.00085	187.69164	351.4478	243.45024	322.64203	162.80344	243.7317	447.33823	1746.0284
"1555708_a_at"	117.1213	59.26654	21.573057	30.14483	34.881218	112.04853	32.027847	40.697193	14.638458	203.20879
"1555710_at"	35.50454	40.341698	54.467484	39.227615	198.9461	15.802237	295.80826	9.6065035	44.798813	4.09475
"1555711_x_at"	46.20568	177.02403	66.55547	230.39687	243.45673	90.70828	107.17425	194.73332	70.5472	242.5982
"1555713_at"	769.93005	792.77454	1411.5317	524.721	1164.0558	446.53552	1185.4093	433.81604	150.7369	172.82341
"1555715_a_at"	1225.5022	760.43243	916.85944	1706.0685	2004.0338	1155.1562	1533.1643	882.6726	629.5115	1049.1329
"1555716_a_at"	720.8807	1213.5244	677.4349	571.1523	1691.712	1077.4883	1108.253	971.0854	692.4592	893.30414
"1555717_at"	56.253166	39.869354	23.499508	18.550488	16.793856	18.377405	25.068632	5.337016	14.5132475	21.4426
"1555718_x_at"	44.408195	63.985043	73.45842	60.13367	295.97003	239.50075	58.19759	17.34545	31.230463	17.13694
"1555719_a_at"	728.9351	3314.531	932.85913	690.1831	1289.917	720.9165	680.0633	108.68237	148.25478	1264.0804
"1555722_at"	536.94366	351.98358	923.0599	458.06592	493.71182	458.3749	404.8591	405.20016	462.86713	281.2891
"1555723_at"	610.22675	307.3973	358.8653	421.27155	789.00665	335.0915	503.08032	339.62488	710.8206	734.0322
"1555724_s_at"	609.429	4006.198	518.84406	890.35535	521.2205	1676.6562	9063.495	13167.608	9765.872	1200.2438
"1555725_a_at"	6430.459	13861.733	3856.7031	3864.9617	6862.4346	4695.968	20349.582	363.24844	218.60493	3944.8901
"1555726_at"	381.15833	23.151472	61.949818	18.379404	170.16118	40.195732	74.69171	111.06904	21.799295	16.822151
"1555727_at"	363.66122	171.51492	491.2854	124.214516	393.37753	173.24062	341.81155	149.87378	320.3908	36.343212
"1555728_a_at"	1215.8146	1268.0717	1194.3756	907.12274	457.34375	1611.608	1846.0492	319.4129	214.35077	343.5352
"1555729_a_at"	864.55005	835.0095	529.89325	917.85	948.0648	887.01495	449.54996	841.5447	360.19885	658.1829
"1555730_a_at"	43362.293	33399.12	36517.207	46000.12	55213.082	47751.473	49315.312	80714.54	85974.45	24190.307
"1555731_a_at"	410.49643	242.50114	60.197227	483.29285	324.0764	448.72488	556.9747	716.37115	792.1346	308.04895
"1555733_s_at"	513.73584	389.90384	38.94355	300.94083	187.7531	973.76056	382.74786	568.69946	366.26242	72.00731
"1555734_x_at"	558.66895	732.55273	527.10516	561.11163	715.0612	708.96655	745.25037	848.89264	883.4311	368.3635
"1555735_a_at"	2500.004	2102.8438	1513.7258	2467.022	2918.1025	1814.702	2153.15	5046.57	4206.5684	1719.3708
"1555736_a_at"	1922.1517	1968.143	1984.5751	2651.0266	2197.1184	1960.8245	1981.6544	6564.874	11029.128	1809.8362
"1555737_a_at"	420.04733	483.86646	638.4255	384.41272	211.88313	409.42212	589.36884	212.74599	544.5697	710.1153
"1555738_at"	81.897354	241.7315	59.400635	99.24953	102.75701	134.78882	86.68148	665.49255	383.32895	102.14787
"1555740_a_at"	156.0804	98.15689	143.2179	67.45116	192.37486	52.01786	107.61568	78.73605	101.2644	33.65527
"1555741_at"	626.14435	484.9316	577.05585	261.24365	755.63	619.189	674.8299	359.35834	295.40555	570.04596
"1555742_at"	1047.2432	872.9737	1420.5815	1283.0239	1423.9983	1091.49	1444.8671	681.35645	668.7649	723.6063
"1555743_s_at"	1405.371	2902.355	935.7882	1864.6971	369.1646	713.8849	1363.4568	333.86688	977.8033	6435.0063
"1555745_a_at"	324.9186	180.30414	460.9124	345.2021	790.24316	804.3328	92.22545	178.16008	225.92862	539.98395
"1555746_at"	666.3367	678.0143	995.86456	705.1654	553.5221	210.79416	1251.4513	639.73883	189.67593	670.12177
"1555748_x_at"	1046.0206	574.10645	1093.673	1400.0458	1115.9275	1408.0636	1355.0284	603.7737	503.21432	486.72513
"1555749_at"	116.43272	27.801668	171.07954	38.685314	593.0593	109.72675	41.90087	338.49155	83.62838	152.17787
"1555751_a_at"	3082.855	3197.5193	3229.354	2770.895	3062.3037	3843.516	3808.7422	3850.9084	5389.9863	9749.238
"1555752_at"	597.8264	760.01135	1311.587	911.875	970.0757	1259.3276	1491.9847	569.0359	817.4327	1252.5118
"1555753_x_at"	152.08322	53.554626	112.03995	52.603382	103.993385	80.33638	358.93152	45.3233	42.22547	63.60006
"1555754_s_at"	2769.4395	438.7734	2895.7573	2511.5623	6855.366	2942.341	2041.6433	1038.8822	1025.0923	322.3592
"1555755_at"	36.05383	211.15668	428.62918	411.67078	270.39417	358.43005	234.41623	38.96405	391.7422	343.2799
"1555756_a_at"	157.06042	235.31296	362.72116	150.64523	193.5947	221.65218	12.523101	161.86075	24.953602	102.07521
"1555757_at"	230.95103	215.50952	741.6219	83.33606	360.76852	626.06726	78.06082	127.133385	372.99326	488.7145
"1555758_a_at"	183.08911	1582.4497	277.596	410.63254	1158.449	507.30847	158.25566	23550.607	18437.746	1136.0731
"1555759_a_at"	688.0387	362.14194	252.25888	222.85545	1150.1648	636.19684	498.9118	350.57504	980.97003	180.39899
"1555760_a_at"	2754.6458	1377.6245	1893.9843	2060.6858	3088.6533	2264.376	2632.8896	5368.945	5896.566	1402.0203
"1555761_x_at"	1498.8966	958.5984	1306.0314	955.0395	1670.9592	862.1722	1400.688	1483.7952	1914.1536	458.8872
"1555762_s_at"	1727.4247	1275.2721	1513.7148	1335.6083	1672.7882	1277.5854	1363.7169	5793.902	4743.396	2191.5696
"1555763_x_at"	915.774	881.8398	734.4772	730.68536	1258.3732	612.2598	1113.2856	368.58795	308.55255	495.80322
"1555764_s_at"	8185.4424	12491.03	11180.639	10943.555	8559.339	9368.135	9558.967	11774.089	11698.9795	7950.312
"1555765_a_at"	150.30704	1090.8706	1535.4473	2170.648	2539.4329	2466.2532	2425.0327	229.44482	122.972374	3074.1663
"1555766_a_at"	1429.3501	2875.317	979.8518	2060.1506	2404.6975	1183.7078	1983.4878	516.91547	301.1374	618.24164
"1555772_a_at"	937.3694	201.49191	255.7068	1631.4591	923.7229	518.7468	782.94055	3673.5337	3110.7673	320.64465
"1555773_at"	79.78345	66.793816	81.20611	53.12972	82.62844	170.44221	106.63819	55.54979	106.10504	199.09694
"1555774_at"	466.7264	575.63617	827.33716	712.7675	1028.4028	746.3831	640.43646	688.9059	581.67993	322.17386
"1555775_a_at"	511.68536	282.91336	1648.7172	826.67096	1007.9497	801.514	999.8909	290.79544	546.9097	999.4676
"1555777_at"	532.9395	303.8357	544.29004	518.0628	714.62695	606.09125	933.86487	49.233753	444.94293	227.62534
"1555778_a_at"	148.32623	423.9501	419.37134	396.58194	63.437294	434.29172	1120.2101	226.05104	55.210167	357.79498
"1555779_a_at"	883.52936	1040.7277	1527.3341	855.4763	515.0847	1429.0483	1653.941	1334.1052	2065.8455	1463.776
"1555780_a_at"	11888.293	9830.087	10555.959	14177.67	10456.024	10924.923	12879.082	17393.514	13179.824	15837.829
"1555781_at"	2310.516	1066.157	1589.1295	1784.4802	1903.3536	2119.2725	1904.2484	4024.884	3848.783	2240.3909
"1555783_x_at"	2051.962	1167.2721	2348.569	2348.3633	1737.4374	2043.4121	2888.0137	2838.2568	4383.512	1694.5674
"1555784_s_at"	1726.436	1530.1523	939.49286	1636.1273	2135.5117	1569.7157	1263.4717	4386.7656	4864.916	1093.8673
"1555785_a_at"	398.3233	244.75284	170.47961	125.398735	722.62537	827.3798	295.30396	1022.0099	827.0083	464.30383
"1555786_s_at"	5299.9424	3638.6829	8179.1904	6201.509	10041.756	4299.384	8082.0083	2718.8674	4620.1025	6029.383
"1555787_at"	858.6427	325.225	1034.9934	829.7697	1858.1611	733.9644	1121.2117	452.21954	566.09937	742.8066
"1555788_a_at"	434.6975	714.99225	975.1877	337.58704	692.6609	931.94946	59.638	2016.9073	2035.0464	283.24573
"1555789_s_at"	7978.165	6646.754	5864.306	5623.1377	7817.3374	6967.115	7221.699	12275.72	14866.843	2578.5938
"1555790_a_at"	13058.638	11979.4375	8218.837	13242.99	13155.053	11175.082	12446.047	9274.638	6320.2026	16097.791
"1555792_a_at"	56.9987	92.053986	365.4781	201.04337	153.58186	317.22372	179.78935	240.71916	375.4772	99.073395
"1555793_a_at"	3657.8342	2020.183	3091.7808	3302.052	3306.4612	3733.5193	2639.4165	1833.151	1408.7646	3376.1467
"1555794_at"	27.324461	73.7559	73.31294	64.1757	26.711794	240.43077	39.69693	23.175638	26.05604	8.118773
"1555797_a_at"	5614.4424	8216.793	3362.3528	5063.8984	4888.4478	5697.586	4077.8271	14781.015	17192.152	3098.822
"1555798_at"	135.4317	794.9311	167.9006	29.50494	28.924799	70.986374	47.110306	35.680733	71.33523	526.05566
"1555799_at"	524.0949	215.0869	723.23645	720.3605	283.1869	121.93782	421.437	100.70219	138.60791	496.59305
"1555800_at"	80.65732	1925.4725	610.03986	48.59366	471.87222	91.21436	301.6502	25.526846	14.024502	1046.5165
"1555801_s_at"	500.5756	2160.3826	759.964	471.098	1049.387	396.4649	616.0777	199.84798	41.348763	1072.3615
"1555803_a_at"	1801.6656	1226.1656	2414.0806	1604.6678	1755.4817	1833.407	2856.6301	3608.481	3281.649	2008.8129
"1555804_a_at"	22.77083	42.307835	37.23522	84.31097	40.386196	33.257343	31.080929	16.221422	24.604921	18.162014
"1555807_a_at"	616.1762	85.896065	977.04047	756.6946	1126.7355	266.34702	499.58655	390.77148	93.54969	501.7851
"1555808_a_at"	1550.6884	1025.1818	1364.9655	1566.1122	1489.8132	2163.8062	2191.7852	1242.1693	1348.3408	1420.3912
"1555809_at"	199.4732	153.50343	188.12575	344.95743	186.25554	158.92834	506.60455	603.27563	138.81136	137.67531
"1555811_at"	1750.7255	1110.6716	3000.32	2084.6025	2265.179	1691.5929	2571.9204	486.59576	1525.9487	257.61606
"1555812_a_at"	2697.9146	4323.6836	2575.3176	1993.9025	1963.8892	2898.2214	6699.119	499.12106	688.9629	1492.541
"1555814_a_at"	26652.182	18714.75	19072.137	27426.99	28378.766	27299.057	30289.352	66419.43	66447.914	16822.807
"1555815_a_at"	4555.135	3834.5493	4626.2896	4758.0024	5305.6284	5954.872	5428.423	3202.3677	4043.4907	2337.0388
"1555816_at"	31.971844	4.749357	14.044694	29.528553	29.20531	17.88131	182.58241	141.40347	343.08902	222.33148
"1555817_s_at"	31.602182	42.883816	38.36123	15.938774	206.75098	80.67612	144.26099	9.008883	40.71353	12.877398
"1555819_s_at"	58.618973	41.495018	88.957726	916.03217	543.40515	658.5939	89.604774	91.015686	77.20788	158.08026
"1555820_a_at"	2082.3433	3094.0527	3519.2874	2669.3855	3822.0073	3253.0967	2879.5278	2425.4268	3042.1194	2151.5967
"1555821_a_at"	792.8676	1636.0293	762.5009	1012.9304	1137.5638	1235.5215	1404.4313	1326.9497	1602.8175	690.2426
"1555822_at"	668.8656	249.83397	972.7402	246.29709	421.63528	882.6016	487.6983	91.41863	76.72739	292.52325
"1555823_at"	9555.238	8249.043	7623.9146	10293.395	10001.491	7684.297	8621.725	6085.505	7642.539	6506.231
"1555824_a_at"	2850.8875	2160.7053	3376.107	3360.414	3045.348	3938.3428	3663.3735	2583.4888	2544.0828	3872.3716
"1555826_at"	503.57236	412.40012	817.8399	705.527	567.6789	872.71545	543.4112	5381.722	4688.8193	526.2739
"1555827_at"	560.7016	506.73373	949.2836	662.9684	814.611	619.9137	577.0696	754.9124	652.45087	764.91064
"1555829_at"	1521.8044	887.11786	497.34622	1245.1185	1026.6398	1520.717	912.13434	200.15594	268.38718	522.7647
"1555830_s_at"	1832.73	1318.2275	1070.7749	1780.7578	1630.5192	2503.4746	992.6283	3407.4463	4127.234	936.0207
"1555831_s_at"	11077.702	5937.7485	9047.907	9980.527	12694.877	9674.031	10883.721	9056.873	8093.5615	4948.6445
"1555832_s_at"	970.9208	3011.747	786.60425	1489.941	562.1927	855.20184	2218.6333	15941.648	16789.686	3629.311
"1555833_a_at"	7297.2207	9327.324	7033.3745	7989.4585	9487.811	9626.048	6716.5986	4112.479	4107.789	7851.7734
"1555834_at"	2077.472	1764.5822	1815.0378	1914.8615	3381.9417	1810.5186	2122.3125	760.8891	911.27734	4041.5364
"1555836_at"	529.1725	370.83807	559.14264	322.65414	700.8175	588.009	527.3323	608.7123	617.1397	563.0912
"1555837_s_at"	13832.206	11635.473	13787.075	13766.301	11853.697	14016.275	12187.803	20604.316	15272.928	19812.904
"1555839_a_at"	101.713684	231.83281	37.953033	318.31064	159.58647	208.08171	52.168736	71.06077	158.67409	88.16645
"1555841_at"	2231.165	2702.9275	1820.1545	3697.6948	2827.2363	2489.9075	2354.775	8850.796	5879.4443	1130.2974
"1555842_at"	3696.7842	4496.6187	1477.1117	2695.7092	5148.384	3238.4458	1522.3041	3421.4717	4407.3013	1222.0248
"1555843_at"	1693.4287	1528.5182	1713.0746	1192.5961	1370.863	1817.2218	1684.54	712.0759	1518.7594	3191.1562
"1555844_s_at"	16773.09	16412.014	17093.371	19356.809	18116.834	14100.955	16430.2	32411.555	26445.203	19323.83
"1555845_at"	1728.1064	1957.8839	2896.0493	2512.8335	1261.0408	2880.5852	1784.6628	1349.7332	788.7232	1947.8607
"1555846_a_at"	2347.1433	3092.7192	1477.0337	2716.235	1751.709	2860.4253	1849.1666	2190.1946	1320.3623	2450.1545
"1555847_a_at"	2080.6233	1619.3649	1500.3008	1228.6661	2878.4194	1822.7493	1829.3375	3097.2583	3534.7556	1726.1182
"1555848_at"	5152.7427	5114.258	4112.689	4988.687	3849.8657	3907.754	3758.619	1532.9321	2048.6501	4691.4463
"1555851_s_at"	72260.055	64887.344	78060.89	76477.78	62741.97	74313.375	83315.16	20849.883	17695.07	55874.832
"1555852_at"	1179.2699	3436.3918	626.87537	2660.885	2832.039	1687.1136	971.46436	3290.0564	2522.895	1423.9796
"1555853_at"	773.9424	286.7874	535.4009	771.2328	881.82947	735.2578	540.8815	675.4671	818.4026	511.56818
"1555854_at"	382.33286	6.7050123	120.97191	47.34648	569.47375	29.134182	832.13727	190.41492	192.99786	202.22029
"1555855_at"	58.231274	20.068333	71.02992	22.464334	63.015404	92.76299	91.19704	23.067263	47.21837	15.489657
"1555856_s_at"	65.29028	232.5313	79.097435	239.20401	117.722595	121.42293	115.36278	52.28439	70.227554	307.9446
"1555858_at"	3387.9265	1774.2311	3254.5183	2524.776	4431.31	2738.987	2719.2139	2982.224	3187.9321	2124.6704
"1555860_x_at"	5183.579	2560.3782	5282.381	3371.809	6422.8594	4129.0894	3870.2695	3427.6553	2822.1287	3580.5737
"1555862_s_at"	23.92818	24.704018	130.68501	66.78519	63.825745	672.2146	41.407227	49.122795	53.467632	29.989351
"1555864_s_at"	6004.63	7675.38	5434.893	5974.4595	5281.9487	6776.501	6408.448	9455.799	6959.5845	5557.12
"1555865_at"	1769.1696	1115.3961	1749.0504	1787.9252	1558.647	1152.894	1127.2435	91.56721	305.02396	1367.5989
"1555866_a_at"	4287.9463	3815.1191	6314.7944	5128.748	5482.575	4603.7134	4728.147	2156.306	1963.4484	4086.9895
"1555867_at"	431.77908	1701.3562	1596.2013	6439.17	4253.2607	7498.309	5223.1377	250.62668	94.878044	9842.888
"1555868_at"	2734.3015	3682.4258	5244.0894	3893.5127	3355.6033	3153.5718	5546.6743	557.5743	892.6461	2394.853
"1555869_a_at"	36.479313	26.59585	29.213612	71.41627	95.521454	71.3442	81.64488	27.47134	101.93138	41.74895
"1555870_at"	2525.8167	1353.2925	3271.8538	2117.9753	2960.6172	2769.1094	1731.5514	1135.1887	1184.4392	2330.1304
"1555871_at"	134.25645	384.76465	1110.3348	381.66913	129.03995	394.21628	408.60666	337.50903	118.81743	740.8738
"1555872_a_at"	1350.5481	1512.4663	1495.0227	1326.1794	869.97174	974.33105	652.1831	444.7876	52.903435	4165.68
"1555874_x_at"	2006.9773	2117.793	2212.9595	2513.5461	1979.6447	1596.834	1744.7797	590.7835	382.36853	4153.1465
"1555875_at"	1629.4706	1307.8328	1638.2773	429.3463	1361.1165	2336.6577	1059.5813	1805.2987	1148.7598	382.30502
"1555876_at"	149.70717	369.65897	248.38365	77.11157	111.45121	112.743355	380.09546	55.265507	528.31885	294.536
"1555878_at"	497.80008	210.4607	510.38367	239.07431	457.20212	454.1065	346.90497	3766.9297	2575.8992	532.6171
"1555880_at"	89.894196	58.618214	44.223286	96.58528	72.95618	73.77568	272.53906	76.20115	31.350765	35.31823
"1555881_s_at"	7567.613	2102.4602	7607.8145	8178.082	7264.2827	8403.877	7994.4414	7072.3057	10890.58	5269.7466
"1555882_at"	6220.831	3955.5789	6355.5244	4535.17	5701.606	6565.5674	3736.7993	1662.2704	1426.4812	6177.8286
"1555883_s_at"	4358.6626	3102.392	4149.1245	3999.2925	4210.9185	4964.7056	3502.5623	1302.6754	1324.5583	4851.107
"1555884_at"	42.22817	15.978406	24.936527	15.078805	63.186733	29.023682	106.542274	18.5992	211.07414	146.75381
"1555886_at"	2039.0117	853.4084	1491.1359	1979.1564	1953.505	2244.099	2325.436	1401.771	1533.5854	1044.166
"1555888_at"	904.6774	1156.7904	1308.2113	847.67786	1225.5719	906.4641	1103.3066	633.4904	450.96237	822.46875
"1555889_a_at"	10342.509	6137.5244	13000.638	8023.978	11735.531	10376.27	18073.83	36037.062	37570.586	8148.9062
"1555890_at"	234.30669	114.70319	191.54152	548.2986	207.75514	64.989075	35.337387	172.63655	237.58385	327.46567
"1555892_s_at"	440.94794	1423.277	893.8542	879.3339	1318.8584	1901.3661	369.87012	448.22528	677.82104	3961.7734
"1555893_at"	1019.12787	640.95575	1878.3398	1034.7877	2113.9844	1234.9336	1452.0703	221.61996	499.9258	949.0611
"1555894_s_at"	2960.2705	1156.5596	3067.041	2578.0486	3236.8193	2190.2065	3484.3545	3648.5127	4408.9565	2839.626
"1555895_at"	90.503845	74.712715	55.435112	86.990166	117.56392	88.19967	53.564358	123.633766	241.85268	70.41932
"1555896_a_at"	5887.825	2804.2136	3828.6348	2830.548	1337.3959	6752.6094	4830.886	4251.2603	5489.1094	1905.0049
"1555897_at"	1430.439	591.09283	1277.1354	1348.748	1696.7877	1300.375	1065.0017	1371.0259	1081.1312	1796.0072
"1555898_at"	346.35513	265.0329	142.68903	330.6321	874.59985	265.17657	338.23352	403.39777	325.08978	842.4759
"1555900_at"	4040.8755	3778.0051	3114.8896	3891.6394	3728.1824	3254.5884	3337.2769	3410.0364	3321.3574	2306.3647
"1555902_at"	1654.5046	5332.7476	1961.8416	2328.4253	1969.42	1734.5237	2060.8884	654.9636	690.09375	2394.5554
"1555904_at"	1314.8927	1578.2809	669.004	836.9493	679.8752	845.27356	1000.19507	535.5601	511.33496	2403.031
"1555905_a_at"	701.2143	317.59787	585.032	778.1497	682.61615	457.54196	763.2899	1073.6542	1305.8397	708.7842
"1555906_s_at"	2825.679	1548.86	2063.0725	2191.8442	3096.1946	2055.9707	2299.6194	4519.6626	3935.692	3026.65
"1555907_at"	886.7566	8339.454	2715.6912	1994.387	183.57454	3486.585	138.21996	4121.1743	3912.4944	913.6223
"1555908_at"	371.78357	809.8404	831.7327	753.7377	1085.0035	1188.1738	1021.098	1397.4397	802.2969	980.00745
"1555910_at"	3050.9714	3681.5422	3739.7744	3504.483	2410.2705	2901.4504	3150.3162	3757.5857	3619.193	3059.1511
"1555912_at"	1579.6985	1019.7949	3000.8406	2561.98	3162.9749	2681.6367	2230.7302	752.1342	443.38635	1225.7914
"1555913_at"	2895.6282	4420.402	2469.2876	2089.82	2724.4778	2699.7864	2121.026	2969.2808	2801.7026	3607.8489
"1555914_a_at"	1120.1637	77.34585	654.06006	539.2454	786.2061	768.07574	496.60544	71.358536	77.46379	419.10358
"1555916_at"	5978.529	2986.3784	5885.713	7653.55	6344.439	6416.5786	4360.2783	4665.558	4485.2603	3239.1294
"1555920_at"	542.44257	929.3442	472.0301	449.8659	1094.8333	419.2803	636.122	1457.8224	1118.9692	790.1615
"1555922_at"	2251.936	1049.7058	1247.3347	977.26	1830.2822	1958.2759	2494.5168	1230.1251	228.89381	497.06827
"1555923_a_at"	761.23773	38.2051	870.83386	177.74966	1177.8541	900.1451	1072.2372	226.65141	457.28964	455.30017
"1555925_at"	127.88799	129.76222	372.25586	218.88791	551.8489	136.92625	20.694618	278.28632	98.761696	78.060585
"1555926_a_at"	508.01144	108.148476	282.37317	324.0751	381.94098	215.27567	305.52448	34.14967	342.86734	277.52106
"1555928_at"	23.340519	28.832012	39.510845	16.888277	62.566418	32.53104	28.102442	8.202145	29.941147	16.188917
"1555929_s_at"	15.104412	345.0897	353.568	275.83786	67.26942	19.57118	52.401245	12.315985	35.254505	82.75511
"1555931_at"	753.2871	502.4167	211.11383	128.15935	1295.5596	819.9397	207.83328	39.02523	129.15446	620.8636
"1555932_at"	55.14917	34.774445	143.02985	14.700124	554.6121	367.25024	117.482285	25.794327	183.41182	24.705317
"1555933_at"	1787.6119	1005.90533	1777.1266	1662.8446	2022.9606	1909.41	1440.1927	1932.7178	1798.8441	1456.6992
"1555935_s_at"	1984.975	349.39938	155.91434	171.22351	192.61148	508.76498	1178.2758	57.83468	97.12863	1248.2847
"1555938_x_at"	251.6301	39.08881	38.683758	37.459885	351.64554	302.29266	298.36234	908.0256	566.8011	149.78896
"1555939_at"	13.591677	12.166494	24.752241	102.31975	300.56314	31.798906	61.40617	12.528948	105.49266	153.42546
"1555940_a_at"	94.72281	75.20751	35.0953	67.41982	119.93857	118.45453	71.48789	88.74215	42.631905	64.27742
"1555942_a_at"	496.46573	90.03373	142.18945	386.18564	740.8021	500.6322	148.93022	459.748	721.0221	237.07556
"1555943_at"	156.99593	1075.7516	1062.3508	842.87756	935.11206	1047.8086	1012.7886	2114.8892	3284.3027	654.42975
"1555944_at"	223.96767	138.25449	136.23332	604.4989	300.88922	183.37392	218.78668	404.51956	660.95905	1624.6504
"1555945_s_at"	7557.18	8917.553	6689.9985	6395.1006	6402.508	6091.775	4937.018	8822.873	7221.0073	8490.708
"1555947_at"	771.29956	388.01724	94.70077	452.80374	515.6947	951.80927	51.51174	249.20561	679.8204	355.41345
"1555948_s_at"	6111.469	7414.05	5303.542	4936.8022	4880.7256	5557.6665	4538.5083	5196.944	3671.3726	5575.6357
"1555950_a_at"	8714.905	1301.3468	7232.3525	7769.1123	8428.184	6613.805	6444.6387	2121.1116	2740.4448	3334.3293
"1555952_at"	182.78603	82.10824	89.309586	59.235798	166.7449	100.24082	202.41544	593.2078	1225.4885	111.489876
"1555953_at"	82.17532	260.50174	145.73886	67.822876	108.41866	484.49323	84.10184	593.1637	592.8996	42.21908
"1555958_at"	560.7998	107.32187	889.8791	584.7731	635.8015	1764.7039	874.9708	176.1749	365.1001	880.8637
"1555960_at"	713.61163	642.0415	567.74976	382.0229	625.8779	1226.6974	649.76044	1942.448	1561.0715	1145.2153
"1555961_a_at"	63908.617	90102.44	73466.72	56972.5	56622.28	53367.44	69934.99	57092.215	66481.18	61224.086
"1555962_at"	4774.3433	2383.2097	3479.3862	4692.186	4042.781	3918.682	4147.7124	794.41473	987.84595	1043.5022
"1555963_x_at"	2969.1384	1983.3478	2111.642	3461.6182	2817.5137	2514.9617	3383.6765	903.2842	472.0585	966.1685
"1555964_at"	1150.3969	1103.2357	1041.659	743.24896	953.5329	958.93866	1120.149	1012.87476	859.9501	609.1114
"1555967_at"	6226.9775	3568.7043	7740.8716	5060.5425	6996.977	6836.5264	6215.566	4429.867	4554.313	2333.982
"1555968_a_at"	9331.637	4204.649	8832.289	8186.7847	10373.993	9334.365	7186.8584	4707.1216	3608.157	1522.2596
"1555970_at"	1179.4688	1240.2177	812.89984	165.68355	1171.9148	655.28265	791.9707	1052.4824	603.8881	919.52057
"1555971_s_at"	3426.431	3784.7065	4473.3037	4251.7085	4464.154	3664.2285	4288.851	5359.364	4980.743	2444.5933
"1555972_s_at"	1141.4829	880.4456	794.2912	901.8704	1354.7651	1176.5421	678.2106	1378.5884	997.24133	64.92671
"1555973_at"	1174.043	836.5075	1536.6349	1075.8619	1864.91	1266.0308	1043.2006	1083.9741	601.18805	1271.4481
"1555974_a_at"	1118.6345	542.9644	546.17267	1162.9358	987.3355	648.89856	819.9872	805.3832	1067.1831	644.0496
"1555976_s_at"	59.15045	240.3828	345.58478	48.268257	70.887215	48.18605	25.780424	880.0302	682.23376	26.451551
"1555977_at"	491.7529	297.5348	630.6912	390.11618	479.44888	41.00116	212.21297	2008.2354	2810.1057	149.12558
"1555978_s_at"	601.4422	348.2058	725.8945	496.21472	837.52997	305.86096	385.4248	1399.7413	1596.3152	130.28358
"1555979_at"	40.60583	28.464493	195.31029	78.84545	112.27643	37.834797	59.385258	52.132587	33.0586	62.577484
"1555980_a_at"	886.2447	327.57843	222.51938	1122.1934	191.11015	243.35657	156.13474	98.830536	204.87611	758.67065
"1555981_at"	1286.3625	2110.6753	1854.5099	1345.1555	2967.231	2515.0566	1251.5171	1994.3782	2650.5022	570.4293
"1555982_at"	2110.0032	4854.1733	1764.6373	2985.0574	1410.6311	1290.6252	1723.5941	796.3965	1435.4532	949.79535
"1555985_at"	451.65643	470.37958	619.1828	660.16754	837.7897	799.2492	930.278	40.9359	400.06775	135.16623
"1555988_a_at"	586.40735	188.07549	322.08145	96.654076	362.63058	517.3085	443.01666	510.766	432.69003	341.8855
"1555989_at"	7892.5635	3426.5222	3331.0493	1771.5277	12384.177	2612.2866	3850.316	2938.724	2232.8848	11109.385
"1555990_at"	3247.5725	393.34857	3440.004	6674.917	4143.392	6551.213	6334.0674	46.904167	403.37503	1173.9269
"1555991_s_at"	5368.0703	661.93915	4954.034	11044.31	4846.6826	9962.718	8724.151	254.23248	429.4521	1523.1917
"1555993_at"	2371.0117	2143.8115	2415.633	2185.8945	2905.6692	2692.359	2465.7244	59.269867	443.10422	5104.8223
"1555994_at"	109.75688	113.328224	99.88536	109.983154	234.88065	59.234367	208.71901	86.574844	90.73379	118.01049
"1555995_a_at"	279.91882	704.3249	686.26544	126.58299	199.28142	172.78275	217.56763	188.97647	432.95767	726.3946
"1555996_s_at"	1003.50726	1370.6874	426.0894	847.621	1114.4417	1023.654	659.5961	2521.095	2057.4363	1106.545
"1555997_s_at"	1770.6864	507.1573	463.52695	1089.5223	1524.4017	1341.8975	809.3672	165.73613	601.7676	351.68417
"1555998_at"	1455.6482	1257.838	1270.6702	1920.5414	1961.4417	1539.8221	1063.365	894.0399	1142.5913	2331.4622
"1556000_s_at"	4063.2922	2144.1685	3765.557	4355.782	4669.2207	5604.8647	2176.03	3781.2422	4164.3755	5404.821
"1556001_at"	1953.0775	1602.0143	1796.8987	2463.7258	3304.3857	2314.5667	1984.7548	1211.3846	916.57135	2278.8489
"1556003_a_at"	81.4553	46.48717	66.50928	46.87078	377.4347	39.858948	112.061195	150.2587	75.72632	106.00972
"1556004_at"	239.7492	265.69556	612.1608	109.45021	881.00104	233.09523	280.45093	306.5173	203.69188	94.05132
"1556006_s_at"	902.06305	1088.4392	574.81287	524.7554	1126.3501	621.7134	453.7505	1933.3989	1785.5837	897.1733
"1556007_s_at"	3117.7766	2511.5737	2303.7615	1731.154	3262.4097	2031.2583	1308.0554	4967.8804	3986.9631	4677.6045
"1556008_a_at"	675.67944	193.30724	323.528	17.453661	351.77213	312.98718	457.4951	464.2484	201.38437	1520.3352
"1556009_at"	597.06854	669.6189	770.537	397.49643	471.87973	957.81287	605.2575	658.5204	742.13184	460.60947
"1556012_at"	53.445515	54.25396	93.68612	47.657623	70.58271	117.283875	110.73203	164.80739	33.679634	55.935852
"1556014_at"	332.3428	629.6097	776.1549	232.38907	588.5196	362.82205	473.16928	184.76839	229.36755	179.28372
"1556015_a_at"	851.0278	702.3761	947.39136	1123.8383	1006.3635	1266.115	1199.3873	1176.0785	1789.1099	1499.0828
"1556017_at"	416.59805	67.95394	431.73245	104.47768	275.0979	116.29488	75.5932	48.87295	96.652626	262.20554
"1556019_at"	450.52032	860.40594	577.7104	831.8022	791.93823	1105.5067	790.1663	265.99933	341.49512	896.1229
"1556021_at"	668.2559	632.0805	1278.8081	1426.2231	369.7088	1448.4015	737.01575	1388.7612	794.351	2550.525
"1556024_at"	1458.6417	965.68256	694.44775	679.77936	1416.6698	1088.0021	991.97797	900.65625	896.73846	1492.9989
"1556026_at"	1325.0759	378.2522	538.1666	936.9444	1261.0758	665.0107	335.25204	8.632941	276.04218	643.4245
"1556029_s_at"	6475.881	1098.9819	4576.714	3612.4873	6339.249	6719.8804	5608.764	405.64236	920.60297	1849.8491
"1556030_at"	740.8983	488.897	98.70715	158.15114	1095.5416	601.9562	1029.0146	306.1264	786.57385	549.5268
"1556033_at"	2692.1194	2749.246	2144.7231	1811.1067	3107.357	2220.628	2344.205	1825.0736	1759.0192	1545.6624
"1556034_s_at"	775.1704	1378.3191	866.04297	5631.2803	3132.7458	1442.7773	2122.7214	1403.4222	2382.3623	643.2822
"1556035_s_at"	5860.737	5666.0054	5839.46	3586.828	6994.4473	5161.3413	2704.5957	3470.3083	2947.7473	4108.7075
"1556037_s_at"	372.14453	298.75308	826.0005	307.5429	309.82867	492.74084	441.63712	477.0164	1844.3762	275.20224
"1556038_at"	298.47913	76.03223	156.86592	426.93826	544.6662	453.99863	157.90422	67.13911	55.390877	823.85846
"1556039_s_at"	5022.2515	2347.1267	8061.7476	3823.2134	6157.5933	8089.8013	6197.657	1052.1774	498.16852	8157.513
"1556042_s_at"	7656.2617	1541.7931	4529.8623	3308.0457	5552.808	4993.6597	4077.009	1537.3	3011.5369	1141.3165
"1556043_a_at"	59.55445	1217.781	1525.813	914.7164	1101.9116	574.3414	73.69629	443.4618	355.60367	1085.1353
"1556046_a_at"	1593.9473	368.0053	625.6169	3708.1138	3286.6365	1133.4445	572.7236	254.16402	338.2615	1485.8608
"1556047_s_at"	9950.725	7353.4487	9459.072	12242.588	8382.173	10200.725	6313.7886	1426.9479	1415.1829	5213.6113
"1556048_at"	839.2304	635.6597	837.1206	760.4828	1068.5797	600.17175	756.1944	476.66962	650.911	848.1977
"1556049_at"	1616.407	1208.3334	1907.1049	245.86166	2386.8225	1293.9889	1129.38	1029.7615	1387.4191	1763.6267
"1556051_a_at"	2150.752	2353.3994	1888.3507	1997.9762	1567.6288	2191.2441	503.6641	1370.2196	1324.9972	5075.489
"1556053_at"	2000.5333	1101.4802	1326.7617	976.40155	2174.3218	1476.125	1320.9927	2424.6404	1538.5864	3210.7405
"1556054_at"	835.90344	1531.1602	823.6617	665.94916	1070.0558	945.76514	629.4014	958.2187	398.01367	466.23685
"1556055_at"	374.01907	490.09082	501.75018	229.00067	517.624	156.71489	701.2068	523.98456	529.72394	877.66003
"1556056_at"	1881.452	3910.7017	2599.6206	2405.3855	2233.1677	2246.1895	1655.791	1400.2789	1576.1559	2022.2528
"1556057_s_at"	1228.716	1109.6138	2562.3027	2498.863	4861.8716	4570.288	2244.9863	38.621376	191.36198	65.14485
"1556058_s_at"	1317.8159	349.09375	1061.8751	962.0068	1777.0845	845.1705	285.70566	1961.5334	1624.67	494.047
"1556059_s_at"	5164.5894	2454.8462	5834.3594	5362.456	5627.824	5384.547	4667.304	5514.6636	5935.3755	4271.2695
"1556060_a_at"	9154.235	15365.948	10094.866	7690.2	10771.978	9407.907	5902.861	10902.344	10170.091	10443.461
"1556061_at"	926.1091	356.64886	1066.6757	1728.147	917.5956	607.2211	690.91284	1287.5203	736.4671	652.8695
"1556062_at"	364.90063	38.300385	292.91486	561.1569	331.40363	15.081241	167.34447	180.80702	339.48743	314.93915
"1556063_s_at"	399.89703	310.32056	999.57336	533.7903	184.16002	509.73898	745.2381	497.61255	1017.5619	515.4329
"1556064_at"	1039.3153	1233.6107	91.7287	350.0435	481.28107	505.13986	197.78438	680.9955	136.40192	497.15668
"1556065_at"	223.65277	619.9449	359.19437	643.5296	725.7952	60.573612	126.62431	366.93378	226.62242	207.14946
"1556066_at"	982.34924	1434.1934	1788.0605	1826.7405	2572.9526	1669.1316	1205.3505	763.79956	956.4307	1435.2059
"1556067_a_at"	1204.6039	1363.8721	2473.258	1505.203	3110.31	2046.4401	2357.4077	1436.7427	675.6724	1590.0482
"1556069_s_at"	630.7287	552.68964	693.92224	521.5097	1097.2517	723.292	301.4042	143.34439	249.01247	905.47876
"1556072_at"	146.03908	75.23683	91.2212	62.397007	87.733536	169.1812	141.37767	133.78885	225.61531	137.68413
"1556075_at"	645.04645	427.88385	621.75037	711.2311	243.70735	451.95096	252.1429	408.3123	139.53831	148.74474
"1556078_at"	1468.5876	313.11447	1324.5706	1375.9227	1372.956	1347.919	985.5745	1027.636	692.462	722.53613
"1556081_at"	684.50995	234.6285	637.4509	663.6815	1184.9227	1013.3816	922.5402	331.786	457.29523	423.1129
"1556082_a_at"	250.64487	448.14334	715.8493	779.4014	976.85846	1061.8615	704.64355	637.2105	672.00073	636.0006
"1556084_at"	382.48187	495.1149	614.7578	622.82666	1006.11847	987.44934	478.31528	176.80838	121.147995	296.13736
"1556086_at"	741.43256	423.01065	418.40457	457.91635	242.6746	481.18103	236.44186	76.54542	446.85858	393.89194
"1556088_at"	804.3937	736.4379	531.88904	418.6278	652.3159	183.8634	146.38245	970.09125	577.17255	1813.2178
"1556090_at"	666.2327	64.1026	355.63086	452.67026	501.30792	567.1189	73.37827	1024.8552	608.9142	1222.0729
"1556092_s_at"	189.1943	69.36704	282.75406	63.20312	273.2331	76.61374	98.405304	155.77766	72.81356	36.901657
"1556095_at"	1701.4572	200.9283	2122.3982	1792.9415	2357.1265	2293.6812	1307.3699	20.467564	14.889395	68.832054
"1556096_s_at"	5917.9336	880.5746	8742.77	5756.229	9417.409	8657.699	5134.96	69.48703	48.286205	29.64602
"1556097_at"	830.8606	223.95135	943.86017	912.3944	649.35236	680.3016	641.846	381.13272	263.13004	875.90094
"1556099_at"	66.04749	17.24546	54.866844	172.88147	118.45694	60.492268	94.21964	169.76793	23.168098	12.396651
"1556102_x_at"	1577.9728	1041.1663	551.08673	219.71384	800.8517	976.04706	337.61966	2087.694	2021.2863	818.40204
"1556103_at"	1123.0823	1550.0306	859.96204	974.50037	1938.7188	1581.3186	620.61743	1219.8602	1077.5449	1468.561
"1556105_at"	687.05817	431.3782	714.395	740.029	631.5014	731.82477	538.99725	620.48364	730.20905	1419.9261
"1556107_at"	857.2037	656.21295	1292.5005	422.65167	475.8908	778.14514	136.83353	276.3444	504.19162	204.47752
"1556110_at"	618.37634	400.72696	414.56726	388.0296	361.0152	166.6818	142.85768	481.64987	340.3973	749.5707
"1556111_s_at"	834.40875	1132.0197	966.4695	640.74695	910.69806	881.66833	1003.8544	847.3918	713.32544	773.21594
"1556113_at"	64.742966	651.8901	196.62172	370.82803	688.03015	140.48938	129.48326	738.3766	343.08145	472.0581
"1556114_a_at"	568.40295	528.68115	190.98474	748.6944	745.8258	847.4331	1077.5421	556.1575	756.1474	500.39572
"1556116_s_at"	197.26862	295.49817	245.24481	149.14725	159.5669	245.51329	124.90085	866.14734	954.15204	303.21762
"1556117_at"	930.16547	504.68582	1149.4487	649.55444	649.8554	779.34717	261.2445	250.91231	341.25165	226.80432
"1556121_at"	3546.929	2781.3015	4049.7163	4123.9634	4482.7764	3905.2852	4739.2383	3175.869	2869.5017	6736.6533
"1556122_at"	705.78723	776.2443	637.7771	643.06244	521.87744	478.95093	687.99445	586.8238	956.44684	296.60028
"1556123_a_at"	648.5985	1152.3862	186.5005	431.57492	396.3613	194.41808	243.21573	574.5503	1143.2458	787.23413
"1556125_at"	405.28348	298.566	478.69247	228.51367	388.41205	278.35168	820.191	116.28328	488.71826	640.82526
"1556126_s_at"	589.8593	911.9225	866.20074	591.28674	663.4965	882.1636	536.6161	631.3246	649.2875	1603.8767
"1556127_at"	323.08975	64.05184	285.80832	62.685368	84.84347	155.06987	121.5471	508.66046	211.5346	254.95929
"1556128_a_at"	869.71204	997.47815	1724.8666	1437.8848	1131.4054	427.4366	686.4064	1102.2117	1151.5583	153.71635
"1556129_at"	3785.4414	3062.9622	2088.3323	2008.1392	2373.7808	2324.962	1612.558	1164.8899	1613.8501	2096.6152
"1556131_s_at"	1354.3159	754.60876	1170.4626	638.6326	1398.5854	763.1966	922.1839	739.63086	887.19525	1149.4083
"1556133_s_at"	19.656017	11.79768	25.764383	64.86597	23.029207	99.79442	34.20296	57.893253	47.866283	105.05544
"1556134_a_at"	80.73931	240.6241	25.702688	20.018892	82.23995	313.41357	139.4905	387.72934	240.40892	1693.9828
"1556136_at"	1134.6923	708.4133	763.92255	1170.7114	1019.7483	1018.39764	805.57556	553.53754	604.4796	379.67337
"1556138_a_at"	105.380226	533.4483	178.35211	158.37105	196.49826	651.7392	147.8847	980.7232	716.2912	58.256516
"1556144_at"	948.99963	739.9952	1128.4636	1042.22	1615.6407	874.39233	877.0596	390.74167	732.46387	680.4747
"1556145_a_at"	564.39716	125.342674	327.62357	443.45273	905.6429	434.51053	205.81856	36.41405	45.08437	869.41254
"1556147_at"	1335.0222	2756.2717	2061.815	1475.3229	2388.6567	1850.3998	1803.781	255.47772	407.5519	2077.8723
"1556148_s_at"	2917.677	3418.2083	3593.3745	1932.5441	3141.986	2565.3916	1736.3918	448.6255	882.5138	1763.7432
"1556149_at"	595.5045	638.5507	419.09824	861.10785	1063.0477	677.9212	647.635	776.9128	331.37256	1035.3136
"1556151_at"	10672.43	9041.174	12530.084	8771.899	8703.634	9492.001	11294.994	3801.9675	3713.6445	39897.953
"1556153_s_at"	365.566	538.8406	867.0205	324.69574	393.34363	455.71323	908.4229	517.9056	209.67711	260.31625
"1556154_a_at"	878.10657	375.42017	55.463844	999.757	615.3197	814.1937	997.4916	390.22952	863.11285	501.6785
"1556155_at"	743.3654	370.3388	736.9647	619.0956	757.14874	810.5451	469.27438	452.8965	406.50687	955.6069
"1556156_at"	150.94627	40.467487	571.89905	329.18362	176.43616	86.49983	91.603065	42.027443	258.93796	260.94635
"1556158_at"	632.03906	426.60968	751.8475	542.09357	632.53253	537.47784	363.70923	236.60759	43.727924	686.9537
"1556159_at"	118.39121	13.467813	432.85007	240.9193	147.2295	72.94044	137.73001	38.004936	342.58698	440.18314
"1556160_a_at"	511.0465	324.45273	1277.4177	735.8726	814.6091	1283.7828	554.39014	568.12946	481.66428	992.1529
"1556161_a_at"	58.311558	73.01163	63.238873	76.105774	100.801674	108.80447	118.58529	29.64243	63.14852	43.46673
"1556162_at"	1093.4896	1064.849	1729.0333	815.2719	1409.3137	1409.5624	1159.5537	621.6876	1035.1895	861.9014
"1556163_a_at"	439.18738	98.562096	72.56226	158.52461	67.17433	213.04684	100.347984	161.57362	142.58626	48.688465
"1556165_at"	256.815	674.4518	1304.1683	340.40033	806.3569	1031.191	840.01666	949.95447	1142.5958	648.7966
"1556166_x_at"	405.297	371.98218	254.05318	472.86734	649.39294	729.74854	500.9349	270.75372	444.26816	261.16998
"1556167_at"	412.98917	296.82895	308.82043	46.33334	353.44742	314.9493	443.6448	56.17681	11.271492	127.83243
"1556168_s_at"	31.43446	44.98813	64.1445	38.12113	103.670425	57.404377	70.280876	40.779976	76.007	69.34333
"1556170_at"	210.12337	184.90985	70.52834	160.0775	369.07513	146.00386	248.25688	99.168335	189.07309	99.94463
"1556171_a_at"	319.55325	561.35297	740.18243	532.8543	86.18532	104.234604	384.6756	49.45071	147.14748	111.537865
"1556172_at"	978.58234	229.41537	887.126	270.2205	810.0619	807.68097	817.10583	594.5243	522.6188	316.9842
"1556173_a_at"	999.23444	575.83295	871.4987	1011.44196	1962.328	863.76495	993.5248	1118.7765	1328.0219	346.84155
"1556175_at"	54.97683	96.9294	164.57478	68.38923	93.7795	272.0867	230.48871	53.765247	187.79137	64.767006
"1556176_at"	1024.062	743.3887	1069.4125	763.2323	1199.8533	1790.9458	1216.3135	1492.0966	1585.7025	910.8574
"1556178_x_at"	1479.0471	1199.2982	1364.8143	1298.2722	1375.6014	1033.1117	1042.585	2729.945	2471.6555	942.36255
"1556180_at"	3794.201	7662.129	4518.961	4436.593	4578.2637	3933.0017	3911.3862	1534.7418	1734.9617	2417.3877
"1556181_at"	529.26624	186.2517	390.24118	667.48175	198.00822	866.5942	372.26254	100.60759	181.13527	540.97253
"1556182_x_at"	840.2443	286.2656	1204.8397	480.67755	1179.7781	1336.3517	1299.1158	352.60413	483.25092	530.17
"1556183_at"	669.84875	1611.5555	1704.814	1467.7803	2271.861	1466.0922	1709.9554	759.5581	1540.2761	1422.0114
"1556185_a_at"	118.72631	472.92496	402.94528	217.07446	414.6383	597.02344	384.27084	121.856575	10.959244	370.22232
"1556186_s_at"	1938.2347	1069.4484	2364.93	1337.7484	2374.2383	4278.653	2601.0579	2399.7307	2039.8876	2114.0938
"1556187_at"	45.031727	176.85927	196.4478	380.14514	163.7183	51.44041	76.45868	42.025482	136.60405	61.911667
"1556188_a_at"	1111.1483	883.6361	1539.1167	1297.7155	1687.729	1096.2899	1259.3945	345.0248	740.97974	1004.66113
"1556190_s_at"	63.480553	250.40149	116.87852	48.6347	378.29807	683.14264	83.44231	498.87283	441.9477	451.08127
"1556192_x_at"	748.51965	750.3412	1079.7686	288.0703	1163.5984	891.3454	183.7027	385.77292	654.73535	182.46887
"1556194_a_at"	4613.9033	2697.3408	3692.534	12935.034	4036.5938	3598.7446	3711.4136	1664.5718	1153.5382	4124.544
"1556195_a_at"	1640.6604	2417.925	2487.5334	1577.8121	2354.9446	2251.5166	1808.7134	467.12082	108.674545	1350.4779
"1556199_a_at"	243.68222	123.04077	72.393196	203.69072	71.69736	99.71304	359.3731	21.89789	61.778126	95.94268
"1556200_a_at"	104.70384	38.58138	348.01273	64.07093	142.67857	82.09515	135.14838	16.397009	53.944294	17.889828
"1556201_at"	126.73456	339.2684	495.01355	654.36707	534.5087	490.94193	515.1717	211.21165	507.7409	326.0716
"1556202_at"	775.38464	468.59665	373.54965	318.30453	851.9459	144.8177	102.559944	1424.7334	1364.9136	393.93802
"1556203_a_at"	827.42896	682.30237	511.74426	127.7479	531.7966	556.92145	166.4019	2704.0205	1613.2325	781.27954
"1556204_a_at"	385.418	387.41034	76.72078	92.34564	495.9777	376.8929	402.42477	504.38455	148.28537	628.1251
"1556205_at"	1415.319	1778.439	1166.1321	2028.4242	1132.2019	1868.546	1276.192	1111.2279	1330.2277	822.1426
"1556206_at"	39.748096	215.90704	123.97241	48.44172	143.45401	58.00444	87.712585	36.06228	88.3629	39.556683
"1556207_a_at"	22.026327	15.576172	19.764715	12.146845	169.99384	4.7645774	274.13025	18.794485	13.008234	21.840643
"1556209_at"	28.62708	27.360165	48.983448	41.710148	53.2003	28.723347	51.675247	19.444849	43.806126	26.845234
"1556210_at"	7.994005	29.89497	31.899712	119.397514	13.861816	18.169664	13.145988	25.454538	34.048527	357.42325
"1556211_a_at"	752.1241	399.59268	926.0326	840.3135	1353.4426	1200.0594	604.9451	1088.2716	717.7544	2060.26
"1556212_x_at"	440.98203	37.560333	15.68045	64.75215	173.61897	345.13492	224.04466	144.32874	249.94391	838.68384
"1556213_a_at"	240.43909	324.51227	82.56759	684.71204	223.0593	102.176636	394.42807	541.4659	813.9382	101.1022
"1556216_s_at"	498.78268	842.4054	446.83667	742.6458	560.43286	160.81401	447.9228	960.02277	741.9325	653.6917
"1556220_at"	48.50553	28.271837	37.482777	48.760124	61.91708	72.29733	104.92306	312.8543	256.33005	106.6134
"1556221_a_at"	268.19766	149.95425	92.55403	171.70409	1122.1637	76.20621	393.1193	614.5805	893.5225	49.412895
"1556222_at"	445.32913	548.8626	484.47223	530.69244	718.72394	581.9184	172.20117	399.39215	566.3436	963.71246
"1556224_a_at"	959.6139	229.16396	1314.4109	1166.6123	911.2201	245.56612	246.76991	48.71158	529.36005	445.7604
"1556226_at"	856.7544	388.0552	649.5423	299.5815	511.31436	466.29257	91.32981	714.3382	838.30566	894.9851
"1556227_at"	395.33472	392.96695	330.8254	804.77655	200.10007	687.91187	184.59723	476.06677	685.74603	1128.2897
"1556228_a_at"	1517.034	1724.9186	1697.9904	2052.666	1020.7856	1103.6433	1826.5123	1499.3528	1353.3638	1715.4813
"1556229_at"	67.91989	240.48314	83.87399	81.19008	101.13514	114.72225	88.16018	614.34863	471.14774	69.94631
"1556231_a_at"	188.86343	508.4636	426.11584	723.6465	693.3868	505.21167	665.44696	580.52155	316.07596	214.50267
"1556232_at"	636.3825	612.36633	746.9028	500.78558	1259.4886	391.56577	782.6412	361.92252	210.68646	575.959
"1556233_s_at"	269.81674	848.6384	412.8052	117.294945	686.59283	210.34727	568.221	204.08385	156.81943	422.90262
"1556235_at"	902.7264	367.0014	1667.8499	1231.414	889.5751	2267.7664	2446.7803	288.12906	421.61853	2081.512
"1556236_at"	1000.4939	1185.3274	1311.8312	992.4931	1688.4203	1184.6377	1358.2253	663.93005	500.9755	1739.8322
"1556238_at"	32.95401	157.5068	139.87099	13.229206	104.72145	347.67966	15.129003	70.87527	76.69465	9.7457695
"1556239_a_at"	86.61904	50.103394	38.558945	85.55678	62.714714	33.851803	48.012566	43.779816	37.586227	48.950665
"1556240_at"	272.4825	111.49746	34.543266	153.2536	48.927147	59.055683	186.89409	177.97917	499.26334	280.76138
"1556242_a_at"	799.0257	673.71857	1261.2123	176.065	841.3187	268.3719	1745.2866	1708.7394	2526.9126	522.2428
"1556244_s_at"	649.22327	1866.4932	919.76874	1220.6359	370.49747	799.8092	355.34406	281.81482	529.9756	2006.4155
"1556247_a_at"	130.39648	60.64309	101.371056	122.49282	197.248	90.8475	99.272705	53.48311	67.54529	30.21404
"1556248_at"	1016.5277	78.22658	711.0377	1072.0925	290.31412	1188.4602	2917.038	146.91956	65.75397	92.73547
"1556249_a_at"	1326.5083	727.1317	1123.8707	1165.9751	1886.2355	1358.7432	1306.189	686.59	1021.83466	369.42523
"1556250_at"	1695.6931	918.31256	1274.0441	1408.7993	1103.6707	731.4025	1776.1577	449.87082	765.0194	1426.8267
"1556253_s_at"	822.0211	811.51843	666.7692	397.47266	414.71136	451.62198	540.9374	174.03426	282.31274	562.26154
"1556255_a_at"	142.41248	777.05963	625.3984	1003.84534	315.47943	249.95354	324.57874	60.81379	89.847176	749.50104
"1556256_a_at"	563.22186	448.5995	500.51273	651.6317	107.31311	424.1969	769.87036	386.53885	197.47311	293.29105
"1556257_at"	561.7812	131.84642	73.353775	53.604897	812.302	143.6005	298.23828	284.3707	246.87845	1062.4072
"1556259_at"	738.7387	124.66052	1358.3951	892.9871	1829.8074	909.60815	545.7784	294.1098	519.0223	879.093
"1556261_a_at"	401.78903	46.605064	822.9759	543.39215	187.5936	270.39377	109.134026	148.11484	61.77138	358.57812
"1556262_at"	28.21041	51.135456	593.03656	151.30983	560.84125	384.2448	65.03176	59.31956	16.754683	54.522785
"1556263_s_at"	140.23643	201.6009	677.6479	218.61931	374.51355	1009.5888	34.990704	27.398722	19.098469	20.251404
"1556265_at"	276.39145	185.83298	180.34999	935.4084	220.56802	936.65814	319.0888	428.69458	62.974693	619.7429
"1556266_a_at"	126.864265	107.2539	170.32814	134.19742	67.516914	406.69543	144.77946	316.10526	141.39935	86.448616
"1556267_at"	68.58733	223.37338	133.984	61.257317	189.14665	220.77727	222.4557	57.364147	345.48007	69.56699
"1556269_at"	680.8392	663.6511	417.24603	809.7034	721.97003	828.4889	1157.222	82.36426	426.20898	1214.7943
"1556271_at"	53.256744	115.90547	111.03123	497.28326	671.4548	100.70258	155.48878	40.75922	77.20211	449.70355
"1556272_a_at"	653.13477	559.7686	805.65405	113.24985	646.236	571.6175	733.81085	410.13687	750.01184	476.0049
"1556274_at"	525.4895	127.22127	1163.5072	937.1686	758.8446	579.725	249.5199	404.74854	271.06818	154.33469
"1556277_a_at"	2665.7944	1577.983	984.59705	723.4406	1235.3398	1376.3114	1176.9515	1386.4548	771.91296	2351.7595
"1556279_at"	223.74629	233.9977	427.424	357.10175	696.0	242.41	574.7688	378.20862	354.0099	630.9645
"1556281_at"	680.38403	565.05804	623.1281	968.58514	1058.541	367.81793	549.41724	213.91931	419.48404	587.8649
"1556282_at"	113.00967	291.92133	113.51844	47.652306	388.35544	235.59103	182.66324	180.57034	136.90828	349.04633
"1556283_s_at"	995.0074	2183.3352	1278.3517	1130.1755	1400.0404	1112.7593	1178.4908	5448.989	5833.1523	1241.5746
"1556284_at"	134.31818	23.233084	152.44514	380.7169	155.04231	349.55484	177.26797	98.051384	228.25339	205.65884
"1556285_s_at"	17931.488	3845.8088	13913.5205	10878.505	11883.306	16258.104	19565.574	13253.328	10590.41	10993.85
"1556287_a_at"	43.934525	63.779644	79.55415	32.493996	33.099106	35.31575	63.28151	16.026201	78.84968	12.156517
"1556288_at"	31.85177	16.890842	27.997211	22.78893	24.747404	26.477308	46.19078	12.015012	34.830975	11.102676
"1556289_at"	61.126656	198.77815	489.1476	148.60104	40.900967	61.690952	50.81629	198.49396	92.10279	40.561817
"1556291_at"	1708.3228	1277.187	1451.4498	2361.38	3285.8157	1222.1494	3482.5977	99.91169	1369.9196	1442.8824
"1556292_s_at"	1257.1163	720.0305	1541.7456	993.88556	1339.0076	953.09076	1986.4243	122.80027	462.0358	835.4932
"1556294_at"	581.9657	324.11566	727.5109	87.385704	960.8787	731.5099	668.82526	317.9158	438.51932	374.15683
"1556296_at"	1218.547	1102.1685	170.07837	917.23285	1720.7538	681.6306	559.85034	598.2761	688.6594	576.3252
"1556297_a_at"	33.490456	35.62297	524.02673	261.4955	212.80563	97.16221	86.65928	89.935974	39.323746	51.440254
"1556299_s_at"	115.261444	78.62501	124.435265	64.52338	139.52492	142.50351	104.43536	223.10257	115.3217	60.784306
"1556300_s_at"	255.50577	58.097992	440.3942	162.7176	331.91315	261.06992	114.307144	12.578664	19.438644	100.15142
"1556301_at"	771.5275	1390.8848	1038.7206	1017.31525	655.74457	1676.0684	693.101	809.90735	888.27203	624.1702
"1556304_s_at"	155.30515	275.03543	742.8202	683.1604	854.99164	329.7235	247.06436	466.37033	213.10474	491.76572
"1556306_at"	1109.2281	1575.1124	615.32776	777.1437	840.19055	801.66046	491.84528	624.488	928.575	2088.2498
"1556308_at"	6137.9756	3308.7605	7263.4854	5333.6406	5064.8467	7223.7285	8662.565	1377.3778	1332.8602	3574.406
"1556309_s_at"	98.453026	250.34021	268.22348	164.69139	91.311035	83.97987	916.2425	88.34482	96.73151	77.94365
"1556312_at"	284.17557	969.79785	229.76843	756.84686	365.25714	135.33452	166.47884	42.098454	109.37665	98.45814
"1556314_a_at"	99.74981	866.9504	117.62907	508.54282	587.10815	636.9916	187.41122	20.745625	239.72621	579.97205
"1556316_s_at"	272.97278	255.35538	93.822266	62.419315	320.75903	59.925495	173.09784	49.280445	32.053833	135.4302
"1556318_s_at"	469.854	454.35233	645.8253	435.70712	802.35126	501.62634	181.69264	61.21699	55.920975	722.5999
"1556319_at"	546.1217	398.39462	1478.173	932.7558	808.82513	536.7449	911.66986	527.7889	224.16022	856.3184
"1556320_at"	240.7384	169.04434	185.44029	166.44093	276.09058	207.32642	385.63785	135.08646	127.7069	163.76666
"1556321_a_at"	1237.6176	775.3294	1524.9247	909.2762	1141.1484	825.3658	713.47943	1011.18286	1260.3181	3176.3054
"1556322_a_at"	830.23474	898.2342	1130.3927	780.5605	1546.8877	934.7348	1091.9851	1850.8221	1549.8252	1432.4994
"1556323_at"	634.2346	333.90558	208.32715	560.03186	279.12512	589.6481	217.63852	322.4263	125.0393	614.77435
"1556325_at"	235.37164	574.3025	521.13104	407.76636	806.11975	725.87054	726.3529	188.23033	196.34222	903.3298
"1556327_a_at"	258.05435	81.50737	145.80243	91.02293	624.42126	146.81084	144.26065	55.173847	105.89534	130.66887
"1556328_at"	1610.8555	157.35054	642.61163	46.686012	31.184357	459.93167	29.234041	125.79426	29.152216	125.60233
"1556329_a_at"	3536.9348	152.95647	1968.5648	164.55775	352.33823	2584.0974	267.60397	8.277657	95.31385	83.847435
"1556331_a_at"	1552.766	1195.3252	1325.0369	524.29694	1337.4843	469.49454	634.402	128.07864	80.7884	838.82416
"1556332_at"	580.7225	30.090086	558.4746	396.3082	601.3423	873.0859	506.52234	499.6588	221.03285	483.28375
"1556333_at"	79.83128	504.6695	526.0894	523.4141	650.9448	408.41724	140.00883	359.26263	70.8194	36.512573
"1556334_s_at"	22.12069	44.776436	125.13995	107.4207	72.85629	50.882023	30.789888	25.24138	46.894817	22.62417
"1556336_at"	3053.6802	1622.5945	3537.9395	2332.0867	2771.9663	2371.669	1612.7574	2149.6133	1724.6682	4801.789
"1556338_at"	1130.1603	504.13998	1801.876	953.40735	1224.7941	1403.7709	787.9001	803.4344	775.55383	1400.4882
"1556339_a_at"	779.5601	235.9053	698.31195	114.82776	951.5212	358.27762	715.2964	655.7102	395.76868	921.7985
"1556340_at"	343.7982	86.33341	243.00285	224.88431	312.56607	165.63876	290.04587	85.79461	89.2583	97.48569
"1556341_s_at"	5516.8794	1881.2546	3258.0574	4790.604	2712.3206	4480.769	3176.3584	2452.6938	2472.1082	1553.7455
"1556344_at"	160.73294	206.12991	56.6222	72.12362	593.4156	439.62225	70.60305	774.4331	912.07434	232.09895
"1556345_s_at"	2304.9048	2068.8552	2362.1013	1509.4017	3178.147	2561.0437	2290.7415	1385.1832	1892.1836	2562.0332
"1556346_at"	87.053894	494.87964	267.33737	433.3068	377.58292	187.23624	116.33385	1309.5203	746.15076	528.95123
"1556347_at"	183.49597	282.70792	188.74245	46.674057	102.15183	105.74995	477.13577	17.885288	125.3304	726.4671
"1556348_at"	30.89933	373.2512	681.8444	167.37053	138.02951	228.85236	59.20181	572.7996	430.36075	38.554348
"1556350_a_at"	156.95273	319.4585	113.49142	347.3842	233.46336	85.520134	41.843086	224.47656	20.556948	89.43543
"1556351_at"	187.13676	162.9666	44.803627	46.27335	283.28607	150.65321	22.571817	127.67443	40.090706	7.2255077
"1556352_at"	3538.435	2134.2388	3730.4204	2292.6492	5817.4224	2900.339	3017.892	6589.4995	5718.2495	8165.061
"1556354_s_at"	475.5382	185.76381	306.70312	79.96273	265.27667	21.841797	89.36825	161.8549	119.4564	18.921246
"1556355_x_at"	1500.762	424.05664	1336.1047	500.6818	1479.4928	907.97925	1387.4535	223.46284	628.2512	262.09503
"1556356_at"	247.81236	671.6351	252.76105	387.0675	408.09433	280.63177	285.1343	529.52325	84.376335	357.38593
"1556357_s_at"	12.14238	8.331542	143.24536	16.89158	83.08166	85.86753	107.67921	124.30657	33.195766	155.0953
"1556359_at"	681.4508	284.77927	198.09668	85.24572	430.85406	79.9777	169.906	824.09125	440.04617	791.628
"1556361_s_at"	251.41325	186.07857	16.395578	388.0659	273.76523	132.67288	236.06099	118.31324	181.68048	86.80012
"1556362_at"	99.25645	323.54517	183.02829	44.57157	473.16147	233.71007	1439.0441	334.47702	559.0214	204.73318
"1556364_at"	860.23486	142.56366	343.11072	325.2416	99.466034	198.18988	166.12012	63.460743	159.01837	2271.8735
"1556365_at"	440.6335	272.21503	1264.6832	699.24243	1253.7372	417.7888	1003.8613	255.11464	135.02486	353.8902
"1556366_s_at"	9.696064	7.354631	11.585264	101.627975	11.964285	31.437052	42.507523	14.003887	235.31538	6.7375407
"1556368_at"	538.71844	44.97637	134.63116	86.67826	213.40398	97.80778	218.95515	111.38339	439.31534	69.90894
"1556369_a_at"	34.837902	235.81584	54.30091	187.98692	139.34012	52.42641	75.824745	34.68677	55.8284	39.749496
"1556371_at"	21.052734	133.78421	68.007515	32.363163	60.990788	255.34505	62.579784	20.62656	21.92856	13.81599
"1556373_a_at"	1107.3475	666.3956	1273.026	584.94495	1299.624	711.54553	911.6005	773.6311	482.74677	2525.8733
"1556374_s_at"	1065.5342	380.67017	1514.5907	965.2752	1457.6809	1042.6798	872.8201	169.41435	701.80005	562.437
"1556375_at"	788.1328	466.64273	655.8249	475.97348	504.3488	675.97174	654.87146	671.0214	494.89072	1374.5574
"1556377_s_at"	310.34814	378.00787	618.5786	164.56148	103.57508	148.09683	192.24615	91.00452	42.96559	1292.6149
"1556378_a_at"	163.72673	185.6056	26.33967	164.38701	45.163784	57.583687	59.494526	34.066532	58.32322	20.628094
"1556381_at"	75.974976	237.13158	476.1842	120.53783	127.72432	104.372246	72.372154	215.13004	228.39854	1179.6765
"1556382_a_at"	57.003094	110.51659	218.7709	260.82413	407.43057	44.186684	80.9389	266.34683	272.28073	1012.5749
"1556383_at"	685.7029	327.5412	978.7257	957.5779	721.02014	1028.8566	362.9654	1307.1869	1255.563	529.0675
"1556385_at"	1464.9755	648.2763	1730.1234	817.16895	1797.6235	1027.0308	1353.2336	985.5545	1066.5474	889.0879
"1556387_at"	497.38138	618.3137	533.99414	351.49106	680.3475	586.4896	373.1215	296.64606	265.75073	621.84607
"1556388_a_at"	327.83575	444.6741	965.0663	342.56927	973.96375	329.12762	825.4607	429.85278	537.1054	696.2638
"1556389_at"	720.7199	2217.047	662.8599	1129.4393	1111.0005	1050.6989	239.98343	1003.68866	1394.4021	793.3098
"1556392_a_at"	36.924526	174.20563	58.227135	141.1526	248.54823	69.782974	295.10895	94.38153	253.95097	213.15788
"1556393_at"	620.42114	392.67065	783.74414	219.89722	619.50116	528.00165	616.00806	559.0797	388.01773	615.7653
"1556394_a_at"	63.65462	61.77284	70.15945	115.98368	121.08053	71.13515	171.66505	41.06647	29.999811	85.981674
"1556395_at"	37.29612	21.713295	33.83067	31.465536	8.2138195	36.074966	25.50321	9.905426	12.185381	15.360782
"1556397_at"	192.34279	349.95416	328.3886	113.34486	216.67001	184.59105	226.29216	80.57068	159.11884	134.8164
"1556398_a_at"	792.6049	1435.4662	1256.9972	952.30817	880.45575	932.65784	1219.3489	111.28351	214.8364	869.1022
"1556400_at"	296.70874	120.54152	147.27711	156.45178	533.6829	346.285	119.298706	213.05312	203.90956	242.59523
"1556401_a_at"	60.880985	33.23676	47.113953	87.64411	229.18512	44.88125	306.93973	39.112823	92.30588	38.344036
"1556402_at"	456.7757	210.80878	677.7874	33.908497	609.0334	298.04575	106.597015	129.25703	52.59182	74.72894
"1556404_a_at"	264.6036	362.25974	351.2638	115.503204	201.01105	220.22025	242.24385	134.58311	33.090767	367.19775
"1556405_s_at"	111.045074	178.9476	418.16733	422.9935	303.4742	92.95308	837.3094	114.23178	716.6566	242.08705
"1556406_at"	127.0951	21.07281	60.984215	69.50609	67.12764	46.99017	68.33226	25.695316	137.89365	47.684273
"1556409_a_at"	750.6896	265.98013	207.8226	169.78268	848.3636	318.23233	516.71466	943.21826	873.8088	565.6764
"1556410_a_at"	212.22356	28.001808	69.277374	138.8771	275.51398	133.16246	87.75356	7.8973637	59.369167	118.27456
"1556411_s_at"	460.37222	336.7433	161.34976	514.9583	365.49637	684.9414	491.7437	71.17045	105.27888	119.245964
"1556412_at"	1129.2021	438.38736	204.53558	301.3019	497.81448	934.57196	663.99316	612.5145	583.8079	771.65857
"1556413_a_at"	237.83829	491.34732	520.34106	561.47784	948.3328	885.94073	150.42708	157.89978	445.38742	255.50444
"1556414_at"	572.82996	620.0793	1115.7916	761.23975	650.86847	892.9179	1026.3348	818.8162	813.488	400.64224
"1556416_s_at"	2160.333	2216.6895	2749.4438	1731.5662	3120.1338	1796.6493	1522.3951	2588.9775	2263.6633	19421.873
"1556417_a_at"	571.4459	60.668568	427.9531	74.16989	183.28127	489.826	575.36334	280.94724	336.57596	100.11985
"1556420_s_at"	169.08076	213.26837	102.259056	239.46729	352.21527	577.87024	157.8268	152.55128	230.62335	569.17957
"1556421_at"	811.54913	225.27779	526.712	193.76642	51.539383	166.43854	111.320915	19.394394	12.0085745	92.00554
"1556422_at"	1899.7277	2111.9983	3387.9973	2894.039	3419.695	2552.9558	3271.8237	971.6032	1146.4911	2062.1191
"1556423_at"	1223.7985	551.3375	480.32327	881.51404	1440.3555	767.13116	661.6204	803.92523	631.8572	674.86084
"1556425_a_at"	1421.1155	1036.4943	1228.4485	817.49744	1183.8094	1345.1631	907.1609	2108.4993	2003.5444	3186.7178
"1556426_at"	457.41083	201.04863	680.6133	635.72345	742.614	776.70544	728.44727	380.68933	605.3247	622.5029
"1556427_s_at"	133.49918	442.0601	1189.7415	873.60596	1344.1086	1011.72565	1323.2877	7483.4155	3898.137	762.4018
"1556429_a_at"	256.72015	23.825596	96.75494	92.618195	60.453922	68.59256	101.33424	680.41656	407.89233	52.328262
"1556432_at"	217.9559	446.0215	478.63818	59.620144	788.3278	510.52774	579.18335	359.44516	69.85503	684.1187
"1556434_at"	532.405	519.4797	469.31082	463.61856	461.74893	546.1523	552.0524	691.2278	710.1622	829.5975
"1556435_at"	89.321106	387.4782	440.70624	508.02353	675.3009	583.71704	632.1803	243.62587	260.95126	118.15377
"1556436_at"	1413.7433	829.3128	1164.9814	1188.6927	1504.8909	712.4638	1213.8171	360.26157	708.4182	1448.1653
"1556437_at"	368.05453	147.6239	126.66809	275.37158	452.89194	370.86414	226.84967	347.37134	225.539	46.4504
"1556439_at"	280.36868	97.46309	354.96057	429.32547	120.058525	487.9582	115.590385	56.27108	219.45622	259.04443
"1556442_x_at"	2535.81	3453.7256	4625.887	1586.2826	3910.0122	3624.356	3244.7769	4858.085	3747.067	7157.3706
"1556444_a_at"	100.46305	1467.506	1973.8492	1396.7864	1221.8384	539.875	121.77945	108.63495	106.32086	23819.209
"1556445_at"	102.63923	181.08943	322.32767	309.15045	341.82532	59.93064	53.453495	82.43012	203.24338	285.50552
"1556447_at"	32.63692	65.23731	167.1447	418.66446	212.0455	198.36665	157.55992	86.966965	13.994092	70.974525
"1556448_a_at"	41.70871	26.48046	111.4692	28.419453	92.55804	32.448616	48.217876	33.56434	34.486725	22.98021
"1556449_at"	731.4849	983.7394	278.03418	585.7725	1132.8198	802.51013	301.7018	134.42375	373.52643	992.1552
"1556451_at"	521.43304	121.68012	189.11401	162.75336	314.21304	221.56812	186.26918	411.64163	598.1064	1040.0217
"1556452_a_at"	635.80646	116.801414	625.9441	790.1015	382.00336	421.4433	460.46936	307.7612	576.7858	123.39852
"1556453_at"	80.84406	43.06118	62.027794	115.82052	69.298836	50.90166	63.101875	40.574467	34.9376	36.771004
"1556454_a_at"	53.27962	231.00578	49.23085	20.92432	360.2109	445.3864	59.02864	42.702686	28.098549	180.41759
"1556456_at"	272.2581	605.5978	127.4028	193.8584	242.9913	85.01155	97.12082	49.79522	137.45108	103.95394
"1556457_s_at"	229.82443	62.92608	216.5068	452.4691	347.25473	193.51363	75.51519	194.99469	302.0567	221.06203
"1556459_at"	80.968155	452.32654	227.45589	184.38036	175.46031	264.2166	190.72226	61.358757	59.55933	55.36991
"1556460_a_at"	470.6151	396.5209	127.22371	93.02062	198.75397	401.8325	104.036545	129.16373	154.31544	417.61163
"1556461_at"	313.30618	312.82925	86.781685	139.0083	506.4599	41.781403	42.698803	179.7312	175.98634	359.9145
"1556462_a_at"	165.09671	510.15585	496.7274	41.222572	112.63177	229.54555	460.0288	200.7481	64.21636	888.7256
"1556464_a_at"	1491.3734	781.9191	1761.5098	1280.4376	1408.5658	1256.6803	1555.0774	606.77185	1304.2451	1102.0968
"1556465_at"	214.5669	232.58737	319.8888	116.54643	133.5161	533.79193	262.68182	378.23975	359.22562	19.406353
"1556467_at"	569.16754	449.05536	665.5987	130.35638	1125.3066	627.61615	870.37067	400.6205	396.091	583.6498
"1556468_at"	141.85895	155.75418	153.70534	133.36044	318.11194	48.0669	189.49773	123.24949	124.744545	143.87936
"1556469_s_at"	205.1836	458.90747	446.2869	412.76456	508.56342	551.78845	678.88153	113.52898	473.74185	83.36159
"1556471_at"	129.19649	74.825874	942.95935	138.58562	136.23657	187.22838	220.97606	47.491936	118.80847	39.7554
"1556472_s_at"	82.061195	77.7408	105.26598	441.16895	55.519356	98.22731	83.04988	39.37227	27.74438	41.77197
"1556473_at"	413.5262	64.50115	421.9089	349.15295	647.1979	649.0369	361.1258	63.96575	107.56364	238.28668
"1556474_a_at"	906.629	148.57567	1190.9036	974.76807	1862.2628	998.5052	903.22424	240.2858	354.7324	46.15223
"1556476_at"	794.0835	277.92874	1454.2498	1205.8029	1762.2914	856.622	1128.5184	164.98605	152.19542	203.67088
"1556477_a_at"	411.29254	258.52322	506.53036	143.52275	56.448566	428.50723	544.52484	51.185562	321.97864	403.01944
"1556479_at"	788.45306	706.0163	586.98816	514.2365	316.5382	632.1644	1000.00696	153.79233	453.98135	739.11304
"1556480_a_at"	105.43963	100.130066	106.64996	98.358055	159.23743	98.57857	127.85713	38.54	84.536156	77.73497
"1556484_at"	1741.9911	924.47003	1683.7306	982.786	1941.897	985.2716	1397.2062	500.20822	370.75458	1582.5681
"1556486_at"	698.2577	458.0088	272.407	410.02213	950.3617	172.81282	199.85342	121.41386	349.327	223.80904
"1556487_a_at"	1158.6951	1527.1387	1209.1598	876.1037	1684.3279	1203.5526	1144.8027	370.2911	330.35294	930.7494
"1556488_s_at"	931.47943	705.34644	982.40094	1254.1212	808.237	894.5206	540.1641	28.117521	30.343994	956.14777
"1556489_at"	66.23173	148.86351	78.08564	35.20877	180.23528	91.449524	48.56865	20.283127	28.789925	39.770546
"1556490_a_at"	84.44041	186.63011	90.5795	32.96982	102.834145	76.317566	136.18767	35.305668	32.367462	46.600365
"1556491_at"	340.62723	108.26462	311.8547	100.383675	459.91388	439.29926	212.14117	150.6381	159.88171	200.54994
"1556492_a_at"	507.93857	289.57092	151.98695	314.4584	79.654015	52.894543	40.556778	237.28973	290.78955	485.7931
"1556493_a_at"	584.467	1011.86584	1061.0521	225.30244	810.27	641.5167	35.60325	408.56784	578.29535	2833.813
"1556494_at"	487.49326	101.55774	154.47275	372.7153	182.95287	573.3276	134.72575	30.604448	36.03241	128.94492
"1556496_a_at"	102.943535	85.19664	172.44446	70.60393	167.91145	118.53035	314.80264	258.68915	314.94653	88.63903
"1556497_a_at"	49.352535	31.89759	150.62018	29.94122	299.0761	133.99123	302.76993	35.725853	42.005543	85.85405
"1556498_at"	107.50853	68.317665	57.613144	208.15512	144.59586	90.70913	61.814846	91.99594	107.08889	171.67735
"1556499_s_at"	2099.5437	9334.992	943.4799	817.37695	1042.2087	2822.2322	4672.555	69290.05	63667.684	2156.2573
"1556500_a_at"	220.7718	103.46411	615.96326	45.457184	90.83371	277.12665	410.24246	119.98561	47.397854	63.038303
"1556502_at"	387.36124	61.363407	129.22491	68.54602	226.19958	53.79917	447.19055	174.43355	114.00464	215.02615
"1556504_at"	92.72542	83.5066	139.73196	119.967674	49.197815	38.93016	172.78477	84.75381	59.094006	62.26576
"1556505_at"	541.65027	580.8008	824.5526	350.3119	652.13464	667.6583	1290.7258	291.4035	502.8285	669.79095
"1556507_at"	4355.805	2109.7205	2991.2551	3342.7754	4734.4336	4022.5532	4658.9277	2465.896	3564.5378	3550.141
"1556508_s_at"	361.637	121.73111	855.44604	266.54953	638.10693	666.62756	292.45615	239.85033	397.27124	270.05392
"1556510_at"	125.34795	34.60327	86.99931	112.094246	81.31132	59.761402	221.32686	158.44568	109.69849	1231.8263
"1556511_a_at"	36.820976	33.800537	130.02557	116.58274	155.10628	53.381336	248.02818	57.697163	50.972706	2066.8718
"1556513_at"	661.6167	55.860672	503.03824	102.527855	232.39421	140.97978	529.3011	255.2877	316.93848	84.68865
"1556514_at"	37.203075	54.342888	103.2518	34.09334	90.82403	47.75964	53.596966	57.651455	44.619785	31.114588
"1556516_at"	516.81445	377.8541	525.9538	419.99707	718.2378	614.24194	537.06354	290.86475	103.98757	310.26315
"1556518_at"	428.80927	191.3114	294.33167	158.13045	154.0919	251.85286	233.88203	146.6754	221.41835	160.22147
"1556520_at"	934.4428	556.2521	915.10596	1262.0112	1758.6855	555.7556	164.04323	232.78526	491.56802	610.4066
"1556521_a_at"	543.39105	269.4085	72.50346	399.30096	57.27868	283.05695	663.21893	267.60498	240.5639	128.29524
"1556527_a_at"	290.09055	212.522	233.14046	160.5518	267.3798	338.97507	863.09576	465.17584	327.52524	894.9404
"1556528_at"	32.01285	32.425552	451.36606	147.69077	563.377	93.61406	40.876717	36.36242	319.56046	78.41653
"1556529_a_at"	40.152866	45.8671	91.62638	65.27974	32.15079	200.1033	138.91864	162.32219	109.10468	20.04024
"1556531_at"	246.64624	56.56066	673.3222	101.71405	753.3577	57.861927	121.499985	259.74518	58.612022	296.4163
"1556533_at"	1377.0908	1063.3293	1786.4839	1952.2003	2369.9749	1549.0769	1979.4757	954.97504	1569.2695	1152.4537
"1556536_at"	38.862766	78.45937	187.3982	91.506516	814.6312	58.229935	253.77718	104.5304	35.902805	35.108524
"1556538_at"	633.34644	45.511772	532.7864	446.96118	937.23035	926.39264	77.363235	703.44275	324.60977	124.01
"1556540_a_at"	1246.1421	840.6806	1270.5463	1040.4354	1406.293	1319.0319	1498.6451	772.3687	425.80615	747.0751
"1556541_s_at"	106.780014	14.133492	53.67813	80.875175	59.64912	6.02681	43.77919	93.53415	148.49052	11.7081
"1556542_a_at"	241.5176	81.31583	327.98087	558.2546	750.3015	518.0897	312.71408	388.02304	207.11679	605.1458
"1556543_at"	169.09488	366.3127	562.4177	77.28013	309.5823	401.99017	118.29955	446.08582	451.46707	2377.5312
"1556545_at"	440.51617	594.72986	768.3369	529.2144	1779.4436	725.7988	898.26886	461.3138	681.0363	572.27374
"1556551_s_at"	6628.989	12901.003	4774.1304	7108.205	7693.7456	7345.187	6198.6284	5706.931	7450.1616	7657.884
"1556552_a_at"	87.9246	122.47291	222.36505	374.41537	78.123405	75.82672	296.50772	39.571518	111.82589	243.33966
"1556553_at"	135.2241	452.07187	69.16144	562.0319	391.7944	62.794544	648.35297	511.762	224.54	406.8122
"1556554_at"	47.26428	128.43288	74.5535	78.135925	175.51877	81.06443	86.41213	26.91603	48.321217	38.621372
"1556555_at"	547.2413	994.16046	1256.2997	1042.3771	853.1525	807.9925	1151.6843	411.3045	1194.4841	729.9421
"1556558_s_at"	39.327198	43.704643	58.055977	41.33427	67.79529	58.474636	66.79753	79.393456	40.835346	34.56148
"1556560_a_at"	91.64327	70.93169	164.53734	294.1283	113.02222	82.918816	144.11449	325.43503	315.21957	206.56488
"1556564_at"	442.07507	331.4445	643.1701	401.54874	763.8527	432.2685	92.321396	89.36816	376.72217	104.850914
"1556567_at"	127.49976	89.749954	199.83377	184.63223	180.62811	77.77938	265.44833	610.3554	100.1857	81.65758
"1556568_a_at"	949.2346	1129.852	720.59155	434.37335	728.48114	441.9882	614.20074	729.70953	706.28204	1485.0055
"1556571_at"	152.09325	194.62357	47.02831	189.11159	72.27926	51.723003	74.05032	188.16429	45.209106	350.43222
"1556573_s_at"	108.54088	89.55281	149.13898	139.61908	135.98071	116.31693	112.27737	52.53667	69.47473	97.999115
"1556578_a_at"	547.3693	549.0665	595.4758	207.49767	53.707367	842.50946	680.7978	299.27332	457.7657	59.325672
"1556579_s_at"	3821.359	3136.087	3279.646	2164.8704	2650.7224	1900.1078	1370.6677	659.5208	613.54944	1445.8352
"1556580_a_at"	302.8801	328.25507	428.67438	239.96127	261.50836	137.00838	99.7327	148.0678	41.592445	240.64035
"1556581_at"	1459.8066	1500.2325	454.6446	800.76587	861.56635	931.3816	869.9841	847.56995	705.3076	639.05743
"1556582_at"	3266.625	2760.5212	3821.8088	3545.1697	3990.5547	3138.7341	3399.5261	1963.6312	3144.0679	4107.017
"1556583_a_at"	570.61676	1466.1693	581.2003	297.43857	390.1302	676.7461	955.4008	274.21832	225.80379	519.8112
"1556584_at"	1161.8501	922.5452	1307.9377	1155.5903	1473.277	755.02356	1029.3029	110.216156	67.88609	894.8792
"1556586_x_at"	1044.2306	1667.3309	2052.74	1423.8748	2735.9949	2239.664	1520.3143	421.1561	824.88354	1402.6353
"1556588_at"	2430.5437	1800.8915	3047.1238	1820.303	3627.67	2398.1216	2164.4011	1245.526	1815.3379	2128.0833
"1556589_at"	654.00964	344.18048	975.58875	439.64502	624.4621	441.96655	437.38464	297.23483	832.67017	804.7654
"1556590_s_at"	248.17372	72.55483	43.55499	26.913559	33.731518	209.9159	48.889553	88.49654	89.74026	944.25195
"1556592_at"	17.346771	43.53251	24.62112	19.036541	99.16323	19.51486	348.847	129.12762	32.421364	6.395251
"1556593_s_at"	189.20494	325.08002	889.9565	764.6847	672.56	414.27567	551.3774	430.025	101.32396	410.15967
"1556595_at"	408.67618	432.69778	777.7461	538.96655	575.15576	626.0685	629.401	186.35005	374.59814	738.6627
"1556597_a_at"	744.6746	819.19434	861.7341	906.78644	1172.0531	1299.2812	293.91476	1070.5232	856.54974	964.4151
"1556598_at"	94.264595	6.0488343	10.978896	23.815506	24.209206	52.149	8.975703	7.49558	4.925943	8.1784725
"1556599_s_at"	263.05148	130.79988	355.18167	21.751268	26.962154	203.14572	399.90686	107.12671	29.212296	294.69592
"1556601_a_at"	630.9189	632.9025	825.5692	939.8161	967.5131	870.2811	403.6076	305.13284	178.13397	402.41208
"1556602_at"	40.29591	633.60974	496.59558	268.93677	477.83655	368.47595	470.26978	156.02614	24.060843	3341.2253
"1556606_at"	834.0952	444.0345	661.5235	475.50644	242.59477	388.08405	347.76965	181.1782	545.2548	582.1782
"1556607_at"	224.59625	596.11053	639.3662	579.077	534.101	272.98145	596.15485	558.7769	650.02423	264.54245
"1556608_a_at"	21.614704	46.124527	41.087357	45.15154	121.16386	128.77605	81.13663	256.28345	351.2031	40.242626
"1556609_at"	111.25676	110.88867	203.95816	151.80342	756.8062	394.86804	34.132206	221.299	182.93626	168.46548
"1556613_s_at"	1351.0844	849.68225	1732.8286	582.56287	431.37616	1419.6278	1634.9048	1401.8201	739.55865	3227.7507
"1556616_a_at"	520.908	270.03934	230.58673	105.876816	85.32376	22.016562	265.23312	469.24097	374.075	94.39245
"1556617_a_at"	45.6013	21.70095	78.52725	62.741898	81.457375	86.79746	124.77884	26.073404	67.607216	71.39362
"1556618_at"	553.2744	519.15704	441.29422	902.04663	1022.4297	788.2426	424.58966	191.02852	480.30457	613.3622
"1556619_at"	908.4195	527.4785	949.2644	733.52856	863.4638	802.1632	793.07477	155.7441	206.63863	308.15402
"1556620_at"	1454.146	998.8813	1209.2844	1372.7603	2088.9695	1148.9249	1110.3367	890.7889	1081.4011	811.05115
"1556621_a_at"	490.7331	590.25024	982.9606	95.39147	1414.9631	189.60347	1108.5469	440.6102	483.34467	1520.2167
"1556622_s_at"	25.065426	24.851116	256.88342	27.217636	120.36209	215.32036	57.27469	126.741486	106.909775	31.454561
"1556623_at"	32.491116	14.642751	58.754482	60.2176	410.06213	48.364777	53.705242	31.69737	61.20561	131.81076
"1556624_at"	32.55625	137.24896	29.494297	8.907245	42.086147	87.69583	52.443924	130.31851	193.11235	144.30196
"1556625_a_at"	54.605045	19.569847	159.74574	21.817385	63.381527	135.08376	124.99864	82.84486	39.728836	21.373676
"1556627_at"	501.81995	66.153275	585.7753	687.6911	1099.9249	641.2031	347.6189	361.60364	493.79373	868.03485
"1556629_a_at"	5785.266	1901.8257	5965.482	2922.6128	5641.0386	3813.6235	3304.1003	491.9312	588.39276	7287.871
"1556630_at"	198.2966	38.79422	561.8019	44.315277	72.007	196.72801	141.85963	277.5047	112.34647	25.534698
"1556633_at"	1323.8046	1416.2931	1356.4229	2068.4944	2923.8218	2557.798	1518.7866	378.32202	638.1082	2052.126
"1556636_at"	1054.1002	794.25604	1001.2418	1064.8312	1135.9891	1220.0673	1033.349	160.37148	466.7084	1220.0635
"1556638_at"	515.9328	546.9824	669.0892	505.03766	921.9401	699.1471	645.6427	424.19907	549.42267	968.65906
"1556639_at"	459.84116	62.379303	116.280815	137.1295	136.1504	135.18524	211.12537	329.3008	86.46109	75.514015
"1556641_at"	10784.324	3301.351	34724.504	8914.555	10207.781	12332.48	8485.443	193.87637	180.81934	10682.37
"1556643_at"	49.00527	264.7553	557.9401	312.95474	187.17192	376.2866	134.08272	477.08273	546.6657	196.98856
"1556645_s_at"	716.9975	449.54498	821.1115	418.1601	1885.5399	1091.106	830.2798	464.11172	137.3226	311.07382
"1556646_at"	6648.3286	9387.139	4811.9834	6861.222	4514.2812	6597.6055	4414.681	7936.7017	6745.105	9775.665
"1556648_a_at"	169.81982	34.04583	546.474	319.48438	374.52658	230.68642	93.921486	49.34868	496.73364	28.734398
"1556649_at"	224.45781	157.78261	226.34259	364.5938	356.17233	177.57974	471.7288	97.575455	646.904	198.70691
"1556650_at"	440.25708	1010.32996	81.64738	84.932884	1038.4695	338.1699	88.55401	62.25243	114.25385	1727.6907
"1556651_at"	447.36572	235.87541	197.07674	59.62763	65.882324	548.09155	261.79593	51.044415	85.08486	298.77206
"1556653_at"	347.50076	301.33832	55.526657	78.37436	269.86758	107.4531	311.76236	59.920998	77.462006	288.62418
"1556654_at"	228.48688	356.00406	40.957268	35.096264	40.958134	106.542786	90.274506	285.27933	68.04509	851.3611
"1556655_s_at"	530.15	278.72043	119.431175	318.5976	184.50787	476.42447	236.57706	370.04358	416.59015	629.46045
"1556656_at"	837.71924	516.1813	759.8577	1002.19794	354.567	728.8063	188.63503	632.58575	670.8563	590.37964
"1556657_at"	675.11115	694.85443	735.3589	566.43286	938.7312	781.53436	845.10986	500.15186	635.74243	1057.4424
"1556658_a_at"	276.83447	542.8945	957.43207	226.78334	583.1667	441.06534	222.4245	325.5892	323.71393	618.508
"1556659_at"	422.3791	461.38422	155.59116	202.40395	1687.5867	542.99774	929.9079	52.264404	294.8303	520.1842
"1556661_at"	1004.95776	799.56586	549.5151	612.40564	200.23912	892.186	996.87823	238.70793	493.3676	509.92932
"1556662_at"	168.8589	183.39474	445.21344	604.96704	461.01678	167.39322	908.8467	409.1999	91.55642	112.89091
"1556663_s_at"	145.07748	43.59063	85.528625	60.23092	293.03894	41.90705	373.20154	23.734703	26.091652	139.96263
"1556665_at"	53.413998	545.4818	750.94543	456.40036	734.99225	806.5922	435.17566	323.97342	55.21582	300.02127
"1556666_a_at"	331.0889	213.80734	430.96313	181.51645	67.51218	214.12103	439.05612	94.16218	341.23218	423.92673
"1556667_at"	400.95276	462.4777	99.24282	61.934006	97.96498	440.88953	453.05396	213.65762	373.4224	44.15853
"1556669_a_at"	68.12567	43.62937	91.80719	62.40988	70.717606	99.33348	112.35154	50.770226	52.18749	44.80842
"1556670_at"	97.63006	50.573402	151.87878	110.04653	128.90463	76.78566	65.0462	80.71894	69.20345	306.15253
"1556671_s_at"	408.02457	265.48312	586.41284	478.26163	980.0225	451.84534	536.6161	69.89118	842.74506	547.06384
"1556672_a_at"	1072.6344	819.89996	1014.7497	923.14984	1090.3514	1214.1514	518.8526	981.52026	840.1625	1515.4274
"1556675_s_at"	882.94147	528.6667	1429.4419	763.25824	1157.5347	808.32697	866.628	364.21152	564.4879	408.24673
"1556676_a_at"	409.63202	438.01093	646.6218	592.3029	94.86717	270.88654	519.75635	71.20893	25.019037	123.82878
"1556677_at"	349.42657	272.9305	401.86157	72.78171	143.72945	481.92606	431.53558	234.55882	520.1732	404.68875
"1556678_a_at"	520.511	814.8499	531.31134	496.65134	334.8873	539.377	225.05602	207.13452	247.68478	1548.3167
"1556679_at"	497.2747	469.46136	635.0687	483.7469	1426.5293	1446.901	144.64545	308.7458	830.0333	563.6258
"1556682_s_at"	116.669586	429.52072	913.5357	599.0759	734.8961	773.54	153.67592	222.60684	594.22046	1270.8335
"1556683_x_at"	39.863697	571.24036	148.2146	407.28903	181.5484	118.848404	40.425247	361.64212	312.39255	109.77854
"1556684_at"	38.982933	670.04706	248.22862	549.7755	254.31091	88.116325	455.66412	201.13457	52.803383	836.4291
"1556685_at"	754.61285	607.3101	612.35144	387.75076	917.87256	801.29333	599.19183	26.278902	37.63898	2577.92
"1556687_a_at"	427.16708	381.69897	761.5878	170.83655	500.86047	945.16016	641.39264	595.6423	398.9128	495.56305
"1556689_a_at"	152.93452	164.06317	228.69249	115.707756	178.80908	270.72293	101.95945	45.715534	75.36996	43.777916
"1556690_s_at"	1693.9381	1437.6588	1557.6694	944.3981	1502.378	1624.7974	1161.3469	686.39606	1347.2823	2268.458
"1556694_a_at"	578.4114	216.43668	114.3902	445.8123	122.58576	405.16098	424.76526	268.61224	262.34543	347.50775
"1556695_a_at"	242.61014	137.7458	147.59627	116.725945	231.9353	498.38028	369.51248	194.7999	406.78632	158.56143
"1556696_s_at"	107.21668	264.0881	55.332596	108.080215	187.23384	90.05109	346.53552	206.72392	372.14725	27.994379
"1556697_at"	179.15016	698.0365	58.043156	30.808348	88.7128	48.784794	90.18479	101.720245	13.335233	303.4055
"1556698_a_at"	140.63947	1931.5426	423.78683	796.3536	577.309	337.10718	629.86816	292.8973	27.646286	1639.928
"1556699_at"	148.70221	347.62122	649.71423	58.758343	188.93385	112.18812	82.8842	412.27707	202.18506	102.64724
"1556700_a_at"	79.38622	21.395359	55.343956	362.15695	231.33476	38.356113	132.65959	203.22981	91.56933	244.30382
"1556701_at"	670.1171	133.8149	231.89319	126.10483	566.4973	127.98966	228.39331	89.74356	179.6525	102.757614
"1556704_s_at"	136.81995	213.30324	351.52628	47.4491	368.50153	29.564148	248.04755	240.07329	575.74835	35.232254
"1556706_at"	990.0621	1068.2567	1717.7628	905.92065	650.4777	921.6741	1310.1344	287.02222	259.33356	1577.2621
"1556709_a_at"	277.0396	341.89395	294.05167	100.09313	282.18	606.9609	272.53278	138.32748	553.47546	127.917465
"1556711_at"	71.336945	49.09778	60.21121	101.886604	82.0269	76.33421	97.9722	48.85606	217.96999	19.01454
"1556713_at"	303.28946	68.09189	248.85466	51.35375	114.08065	321.2055	379.0014	106.34746	178.95468	222.24251
"1556715_at"	900.1891	1152.6808	614.7192	819.9418	153.47845	486.8914	149.74475	127.55378	66.9859	927.3078
"1556717_at"	1317.3013	926.9934	1246.9896	367.8202	1209.3274	1013.3749	1288.133	416.95154	594.1335	664.0113
"1556718_s_at"	170.08185	117.50822	915.7341	226.55247	435.4991	332.0249	182.1995	42.223125	165.98543	195.55789
"1556721_at"	1233.4409	758.8291	1177.5469	1181.6229	1638.9058	733.74084	1434.2804	958.3463	835.6006	1386.4191
"1556722_a_at"	1229.8008	937.1174	1239.2029	777.5468	1207.1681	1562.5061	301.9822	1042.8826	752.3864	907.27655
"1556724_at"	253.92455	344.00806	266.267	83.09599	162.77008	462.23483	201.57709	197.41576	529.705	416.0259
"1556725_a_at"	610.6422	928.3317	902.14484	928.4021	1798.8367	1064.2317	124.54172	480.71756	633.0418	1046.6008
"1556727_at"	398.6801	204.73709	351.69214	682.7469	547.00354	946.81256	753.4884	461.73926	781.072	708.0819
"1556728_at"	415.66034	342.37454	195.42055	379.27466	456.02075	400.27142	217.83846	422.05045	146.11531	430.69754
"1556730_at"	1016.08264	1144.5753	1430.9596	1030.8293	1433.5886	468.05484	1590.8544	253.29645	767.10706	1061.8933
"1556732_at"	915.75916	697.70874	934.83203	709.7753	1556.4369	932.775	587.0363	961.1311	1008.6652	881.5904
"1556734_at"	465.30734	730.93524	1215.2217	513.96155	1253.6315	693.724	1222.2476	198.00468	531.09784	402.60123
"1556735_at"	481.0331	333.9677	793.93555	1429.5443	1340.6492	1841.5645	295.07935	482.78418	453.36298	720.7075
"1556736_at"	898.6376	101.87962	463.91534	904.8523	184.2614	203.42717	160.30801	79.59942	74.33483	78.50169
"1556737_at"	475.83994	151.46927	890.9648	953.43695	632.47754	540.24304	362.7609	121.6271	553.7322	185.93515
"1556739_at"	318.2327	145.61218	338.75125	264.98578	384.59958	376.71655	225.71175	173.04419	221.3981	247.52597
"1556740_at"	51.48788	44.995556	85.02452	61.043186	55.164856	63.576054	72.04602	40.00949	68.356766	20.791912
"1556742_at"	1723.3506	909.915	1106.6794	1109.271	1677.7533	1023.829	576.371	295.39978	509.37976	1191.8832
"1556743_at"	11.228662	189.47453	225.58678	264.29816	87.13492	282.20963	151.71603	383.81903	115.6604	165.85406
"1556744_a_at"	822.55493	87.44971	667.6906	268.4817	1114.5718	819.60565	260.66495	1642.0682	1212.0844	690.4984
"1556747_a_at"	1130.192	647.53534	936.1962	822.8777	876.44354	1189.7316	1822.5715	788.99866	1024.9843	100.505936
"1556748_x_at"	1599.8857	957.5968	318.25027	868.6244	423.3042	1285.5105	521.1282	719.3063	941.73505	68.116356
"1556749_at"	31.795015	31.556253	41.643818	24.77603	39.366104	41.812916	43.243885	15.479574	26.92839	46.623333
"1556750_at"	37.57984	105.903404	31.976383	91.83274	82.33843	43.841442	43.093628	408.81003	748.0847	148.20465
"1556753_s_at"	187.44789	154.73438	438.782	156.6688	235.98456	291.70923	278.9119	138.0361	574.2734	179.2183
"1556754_at"	804.5784	922.55774	783.436	1239.0055	642.0075	717.67377	642.3047	263.64563	1137.9357	797.8816
"1556755_s_at"	894.0388	235.30072	508.40674	295.08966	1310.7144	1803.1396	561.2495	149.81668	962.9806	513.8741
"1556757_a_at"	66.791504	45.97861	226.05779	21.78205	271.4274	368.04227	61.849594	237.70444	207.74788	108.4357
"1556758_at"	80.49824	192.57196	92.00628	35.59174	38.428825	84.143265	81.90395	337.3159	73.02852	65.60737
"1556759_at"	36.825726	124.15506	81.327385	16.095053	19.892422	99.55227	16.59881	138.08717	48.335808	55.67744
"1556760_a_at"	164.57927	41.217285	121.620735	76.55772	163.19998	108.97112	126.06004	291.69464	92.84024	39.690174
"1556761_at"	158.6728	29.302109	24.98431	17.636984	47.535583	227.1734	27.01655	17.118658	57.81142	230.45801
"1556762_a_at"	74.38897	38.295734	52.895565	186.24876	80.98302	607.452	101.11904	318.49207	120.99723	204.0718
"1556763_at"	1118.2102	1250.0807	1721.5732	428.45892	1452.1543	1041.223	856.091	162.8915	98.03345	185.17813
"1556764_s_at"	2610.918	2407.014	1811.5564	867.9981	2686.034	1834.7133	878.90405	438.7412	480.9732	380.10165
"1556766_at"	106.44642	122.035736	490.23706	98.02377	111.070625	144.26735	190.41473	676.41656	558.27545	32.504898
"1556768_at"	919.30945	680.62146	961.99664	1324.2466	1571.0258	964.71234	1366.3301	786.11505	717.36566	1098.9955
"1556769_a_at"	25.248009	44.479797	57.191498	200.83922	53.25496	235.5187	74.89899	177.19426	180.48058	38.25472
"1556770_a_at"	680.82697	400.86142	411.00925	414.3174	303.5668	202.88661	215.64032	690.22986	440.6509	529.4569
"1556771_a_at"	1019.5447	1529.5096	1369.0327	437.82803	1094.8955	610.9097	1875.5999	29.019888	248.85791	222.0744
"1556773_at"	676.1473	347.1593	509.89114	250.25581	199.15285	222.91745	357.33142	157.39378	370.2082	220.73279
"1556775_at"	43.725544	44.71264	39.25049	35.182823	641.24805	77.29856	78.90727	16.003847	129.01617	21.362635
"1556776_a_at"	130.16914	178.80214	162.80934	96.99047	152.57169	348.1608	370.21848	50.589237	49.80114	770.18756
"1556777_a_at"	852.06067	383.7174	476.76422	696.45575	401.42166	1520.1974	648.7339	255.5327	255.60251	1004.0898
"1556778_at"	197.68697	552.4902	53.879143	161.26216	622.6736	221.54454	167.44029	107.62369	244.43054	1064.8536
"1556779_s_at"	514.1301	928.0032	91.21879	260.21628	555.55585	626.4061	441.73322	347.25137	199.94371	943.71844
"1556781_at"	138.76039	301.64703	111.32728	42.2201	368.89697	99.668076	447.2234	55.257717	237.34564	466.09482
"1556783_a_at"	184.07494	73.7929	367.41342	292.8101	378.78674	31.543005	216.70866	292.50336	191.86237	298.3955
"1556784_at"	169.75186	519.22327	775.3109	700.2244	621.51434	658.0984	981.6363	564.5268	463.70413	445.07376
"1556786_at"	27.953077	62.223488	63.625797	103.79361	400.7476	50.252766	316.31027	423.41733	20.896029	168.06659
"1556787_s_at"	424.433	539.76874	1024.3109	668.752	732.1836	625.7679	458.72867	248.63274	203.0909	453.26474
"1556789_a_at"	1633.1029	1625.4581	1487.1428	1438.0881	1702.5464	1551.9749	1381.9893	468.84256	328.56476	1036.6129
"1556793_a_at"	273.19095	54.616867	504.45346	133.68076	201.10811	147.80365	204.06265	216.50717	63.177486	87.98033
"1556794_at"	42.605167	546.936	37.761852	263.32605	293.5203	234.65941	418.95767	316.14905	534.3582	272.7101
"1556796_at"	612.921	68.68346	284.34497	313.5591	1285.4443	107.21158	258.11075	45.89038	55.367645	94.050934
"1556797_at"	1113.5197	2485.8604	1681.147	1627.222	2318.5488	1245.732	2216.3809	358.76956	1272.1743	1130.696
"1556798_a_at"	379.6558	1711.7233	99.976456	831.17206	395.90747	364.02213	365.14523	169.7594	319.16208	300.27792
"1556800_a_at"	283.49295	270.6915	115.340164	51.67445	469.90826	47.95526	88.124405	281.74002	277.69745	593.22156
"1556801_at"	811.38184	815.37604	1064.8502	718.2496	1187.26	656.27795	1249.3755	387.95084	529.05115	70.44966
"1556803_at"	535.62775	673.48126	1073.511	707.2339	991.0617	784.843	659.1655	50.89626	322.67993	774.6374
"1556804_s_at"	520.6199	612.2906	691.9481	390.52127	550.5783	316.23816	574.30054	165.35423	37.42318	574.5237
"1556805_at"	254.11838	59.327335	176.9718	163.46251	512.30194	95.0259	101.5082	85.3488	131.2331	506.0487
"1556806_at"	323.0046	651.68805	188.84714	137.60432	126.66805	478.21536	768.2809	1235.1566	1292.8168	1315.4602
"1556808_at"	1188.88	883.3579	1314.7598	1376.0397	1385.4266	945.9955	1076.2764	679.4179	659.2621	1608.455
"1556809_a_at"	70.208595	242.2263	167.11078	391.9472	94.30268	207.78177	79.89864	50.902008	76.46607	802.17694
"1556810_a_at"	49.220695	39.4859	90.852615	85.95366	337.96756	400.38162	153.98433	186.0523	242.41933	235.82011
"1556812_a_at"	200.12117	160.03094	192.029	136.19907	500.142	118.68122	106.30292	53.146328	152.12816	247.81702
"1556813_at"	60.376614	512.2855	642.4379	184.86261	97.8211	292.95068	538.6715	381.08057	402.97687	339.08716
"1556814_a_at"	265.89865	345.42792	72.15507	363.91696	84.76097	590.1517	202.68352	63.85455	22.443527	296.03543
"1556815_at"	159.74506	16.696318	159.72444	104.12517	516.2501	28.075445	271.37848	41.829678	349.4387	460.40445
"1556817_a_at"	90.17439	172.46924	57.255512	246.78363	175.67532	62.86216	261.2738	111.18119	33.913635	212.49979
"1556818_at"	1130.7821	675.0093	1222.9813	722.6326	1370.926	962.08636	720.41846	881.47644	701.3755	2320.7925
"1556820_a_at"	177.96886	283.45312	558.55695	219.44115	668.77594	187.06662	317.1468	886.01733	917.5732	1274.2369
"1556821_x_at"	398.1231	215.62717	944.54895	131.0168	445.11035	437.69974	808.36945	3484.3738	1906.852	2826.707
"1556822_s_at"	119.728004	42.899685	68.49447	158.99464	179.77132	254.0707	161.29793	38.800797	85.63107	36.84343
"1556823_s_at"	237.05891	217.72426	115.75982	161.82475	85.81575	113.30059	125.948	124.419334	98.54338	81.71957
"1556824_at"	1168.1708	1053.6132	1530.712	1157.8279	1967.0177	1455.0999	1834.6484	500.99347	1086.954	936.4645
"1556826_s_at"	127.19242	34.60207	209.01245	64.56907	230.9916	118.27306	98.36459	604.81287	551.9399	56.134148
"1556827_at"	418.5383	493.19858	402.49884	747.91406	616.4403	508.34222	477.75266	438.55682	603.60175	223.68651
"1556828_at"	40.83096	94.92809	618.94135	46.508293	390.17026	248.58383	251.32472	33.526745	107.627464	131.77611
"1556829_at"	853.95807	415.9159	1033.2698	396.5224	1031.7252	537.5695	860.63275	494.4196	818.5725	846.0611
"1556831_at"	447.2294	596.3419	1007.0968	930.3536	694.87366	1258.43	454.95096	725.361	747.9937	2001.4546
"1556832_at"	155.95708	57.110065	21.557667	16.312004	260.7946	26.175838	321.07846	38.944412	46.79427	138.69977
"1556834_at"	16.845806	363.64734	31.225355	16.418352	57.731922	309.55734	136.83084	55.763004	175.17332	177.1675
"1556835_s_at"	956.7186	730.2239	2014.0479	1366.4319	1534.2467	1091.687	1338.2913	270.33307	876.1559	994.8574
"1556836_at"	49.03306	68.99384	433.34247	432.25443	95.70289	57.548237	259.23886	79.742935	125.04833	278.99057
"1556837_a_at"	29.331614	33.082977	44.27485	35.96192	44.495625	46.36004	47.147903	27.944254	49.7184	16.503326
"1556839_s_at"	696.6519	259.21936	729.78204	524.1767	680.1485	704.5828	914.16797	344.45898	1182.3865	438.01068
"1556841_a_at"	101.39657	19.088701	194.31253	231.82042	58.098354	226.34116	93.88364	27.241524	506.43732	53.264385
"1556842_at"	57.895493	214.48076	73.218864	34.607864	58.09699	135.88191	45.358353	138.02295	160.0162	39.56089
"1556844_at"	41.793262	65.27471	163.54575	110.92616	441.13107	417.0515	210.98264	16.574718	54.920616	402.6843
"1556846_at"	340.63364	978.6511	1854.3843	1131.8328	1688.9717	709.13434	836.68024	224.56117	625.3846	889.3001
"1556847_s_at"	107.86998	61.787773	81.460205	248.08527	168.34084	61.80254	119.73793	138.81555	81.42034	181.71443
"1556849_at"	200.90936	70.12051	309.04608	13.866988	361.86563	368.48022	44.01531	281.9791	179.00531	206.82254
"1556850_at"	599.4059	547.8831	378.64078	176.64041	921.1159	543.22217	832.6016	472.6795	94.33373	805.029
"1556851_at"	59.507862	25.461641	75.37864	59.868515	344.60156	55.045246	52.91191	21.398441	52.92318	47.585903
"1556852_a_at"	134.89311	195.35434	349.6297	1156.8599	313.20203	1397.027	793.3034	617.6518	370.5169	761.78314
"1556854_at"	86.21787	74.526146	90.514755	70.020134	72.305786	87.72728	129.06558	60.571384	44.9805	52.585518
"1556855_a_at"	254.35736	222.43132	133.27687	204.69476	156.50836	302.67285	404.63452	146.54308	157.45139	333.47073
"1556856_at"	268.98923	271.091	546.45593	196.545	421.21964	382.60443	110.424416	180.36491	187.9216	122.883865
"1556859_a_at"	88.57351	52.50917	119.70369	83.94531	108.45083	192.07428	149.44939	103.7347	63.913536	99.35271
"1556864_at"	354.29803	727.49567	1086.4471	437.65097	1053.5796	128.09895	243.3673	917.11487	375.8965	791.6092
"1556865_at"	567.0225	49.946365	37.38819	42.99788	42.479607	78.97283	207.57973	320.3953	539.8359	245.74774
"1556867_at"	69.262695	488.97455	248.48988	193.30334	465.00037	435.35623	122.23502	376.0349	65.6315	463.4984
"1556872_s_at"	42.346222	49.644775	102.87794	74.145226	71.0272	155.8374	65.75776	20.443424	32.41822	103.272575
"1556873_at"	11.045094	95.97878	16.242628	13.858939	25.611334	103.42735	13.718139	113.28497	29.093733	7.9956098
"1556874_a_at"	928.0217	535.7968	1083.7203	567.865	549.5293	866.24255	883.5896	397.21326	533.2786	674.0344
"1556876_s_at"	633.0928	217.8146	645.6629	436.51996	396.215	523.5088	702.13904	170.57526	320.7486	172.21858
"1556877_at"	388.37628	602.00214	448.03473	384.9598	263.532	256.43756	683.079	234.26744	168.26266	248.81232
"1556879_at"	296.88586	277.45514	525.4991	298.0411	591.7058	225.16023	605.0363	182.0158	373.61053	792.82074
"1556881_at"	183.78632	676.62604	470.6257	665.4506	956.7561	826.4918	557.4859	254.00186	362.5727	603.3221
"1556883_a_at"	34.444553	25.3241	46.745605	42.73468	102.58741	65.39026	79.00966	16.645885	26.579142	24.034262
"1556884_a_at"	167.54335	33.81475	195.11523	189.05006	19.423939	120.43761	121.58499	20.509008	23.491299	189.38574
"1556885_at"	68.00328	369.26578	60.90851	109.87165	68.8277	16.374895	61.567467	459.3763	618.5921	608.894
"1556886_a_at"	148.08115	237.10776	640.538	366.88977	715.85547	92.32677	180.54176	683.5715	721.72614	113.638565
"1556887_at"	512.2639	268.94482	361.05658	703.66205	841.8506	804.1601	172.97876	276.632	688.0852	534.08075
"1556888_at"	438.67645	208.1701	53.765842	90.33403	394.86624	31.927073	680.96094	37.880417	328.23026	247.83533
"1556889_s_at"	69.8075	40.40095	202.28848	175.17036	11.804344	205.5677	176.84837	3.5540016	33.66497	37.703125
"1556891_at"	615.0726	454.21103	1306.7758	545.70636	789.2288	716.243	725.80334	296.88293	126.567566	337.30203
"1556894_at"	96.176476	50.77914	471.31888	114.67061	405.93375	84.07549	823.9849	263.75937	378.15616	165.81866
"1556895_a_at"	842.05115	639.10455	952.3064	466.96356	586.1263	690.5268	249.33218	245.04066	235.36887	284.25568
"1556896_at"	227.46245	189.71292	320.31177	250.47034	494.0234	52.25531	228.06136	110.64782	50.160683	438.69714
"1556898_at"	216.57124	110.64315	80.41656	267.16776	307.59204	304.74463	118.02635	195.01437	141.80846	336.89615
"1556899_at"	640.34174	426.2452	456.30356	546.26776	854.64435	592.3067	437.8022	300.5881	349.28632	324.18124
"1556900_at"	2089.0874	1418.5751	1091.0471	1768.4196	2795.3926	2004.1246	2569.7017	265.1898	541.179	1507.4503
"1556901_s_at"	59.794346	254.09242	24.804882	21.208807	100.66889	89.519135	17.771349	39.641777	51.415684	12.688902
"1556903_at"	566.5772	408.18756	864.3792	565.76825	639.5645	539.4573	631.1557	292.92633	528.35266	599.7142
"1556904_at"	37.05257	1201.312	127.20505	115.73735	75.780174	384.27698	455.93707	34.002792	41.70758	2167.4119
"1556905_at"	115.19948	497.739	539.90674	516.3422	396.87213	561.83435	130.91068	336.9896	116.84405	411.51443
"1556907_at"	742.53595	409.26968	314.6831	643.3329	1069.5342	349.36194	1406.0006	363.7397	530.949	308.69986
"1556909_at"	183.25778	74.13979	139.6729	202.9341	117.54736	71.71978	421.15924	53.54124	52.245853	124.82229
"1556911_at"	589.8155	523.2443	954.06494	508.2753	654.8466	495.3527	483.67532	458.3282	717.0274	275.85083
"1556912_at"	48.171783	17.370464	128.77962	296.9435	144.98866	72.799446	57.04525	175.03496	205.16599	36.153027
"1556913_a_at"	162.68944	452.83722	402.22873	646.16223	697.3452	440.0392	486.12756	182.51747	209.61285	326.95264
"1556914_at"	242.79724	102.9262	267.1019	247.98233	319.79074	99.74529	366.37732	27.942085	85.49075	132.62187
"1556916_a_at"	67.90579	72.84476	301.15823	50.835182	351.95438	167.40167	354.30475	155.82877	36.71787	110.486404
"1556917_a_at"	482.78726	243.15434	543.3575	515.4125	164.90392	146.82018	281.09348	538.11035	536.2237	262.52408
"1556919_at"	2058.9214	1050.7642	2123.1875	1505.4652	2144.145	2108.5232	1817.1287	349.30002	876.90564	1309.6583
"1556920_s_at"	26.81418	32.927032	54.89947	25.499811	87.58888	89.33318	40.83134	15.00026	39.727455	16.795738
"1556921_at"	190.22478	151.29124	93.537834	326.0326	65.32785	333.87344	750.9535	245.0762	343.41513	34.910255
"1556923_at"	413.017	53.54002	214.1329	210.00264	94.40631	124.00971	82.438416	142.57516	19.467567	345.20334
"1556924_at"	184.79024	289.92804	606.8769	669.97235	1183.7622	699.7315	611.4111	428.81192	869.17584	524.0132
"1556925_at"	331.66946	432.5718	370.61548	212.98814	604.6223	622.55707	421.9936	463.66943	581.9867	376.9837
"1556927_at"	64.98596	106.347466	96.59875	66.59339	56.18717	37.514507	219.78549	51.92623	85.913666	431.835
"1556928_at"	1317.5024	1013.4647	2137.866	1609.1968	2241.5454	507.66205	2887.0085	501.201	246.93411	799.9294
"1556929_at"	1169.068	890.016	1314.0459	1220.0929	1847.2493	1045.9374	1565.2803	488.94052	926.2659	1131.1711
"1556931_at"	466.47607	299.01804	281.42575	399.80783	825.5949	440.7281	226.95657	441.51358	752.9464	563.1129
"1556932_at"	163.05307	82.58646	205.60072	72.60179	103.443954	96.77164	96.19708	257.97696	321.56735	141.91104
"1556933_at"	216.87772	32.092278	595.61774	45.899178	252.14082	249.2485	307.99274	144.3279	88.69247	155.05635
"1556935_at"	199.19911	163.39386	717.0684	52.842342	301.50677	183.81221	569.70496	345.23962	385.18805	238.45131
"1556936_at"	39.622784	93.39959	35.766315	240.80412	323.75836	15.405466	36.426476	5.835281	157.47136	957.0118
"1556937_at"	590.4827	53.456024	353.25168	309.94278	932.42645	102.30378	114.65245	98.8025	219.15135	557.8347
"1556938_a_at"	238.83072	25.958136	278.44727	433.48627	72.737854	155.18343	441.0535	124.97222	339.5233	164.17445
"1556940_at"	555.03766	1255.2084	367.8714	371.93155	204.62437	974.9405	577.1806	283.17252	107.75758	681.60535
"1556941_a_at"	599.45264	1875.1927	604.174	486.75812	374.40146	829.01184	344.01895	45.87234	259.23114	1226.2874
"1556942_at"	562.9516	421.08997	180.08177	589.28723	397.2267	482.75903	276.62347	343.5269	455.96695	2710.654
"1556944_at"	110.1167	516.2094	217.09741	61.549305	932.47723	748.98285	723.69916	739.0766	616.5607	105.906
"1556945_a_at"	96.72029	87.1952	339.3528	253.67412	426.0466	334.11554	149.45686	97.577484	190.04167	103.00551
"1556947_at"	287.24973	321.86942	129.32272	287.77008	795.8564	168.41893	91.96389	139.97906	685.5205	1006.0361
"1556950_s_at"	862.43774	689.47736	1227.6757	847.6333	1235.1593	795.39014	1069.2133	707.1104	650.19543	1107.9816
"1556951_at"	1265.2455	688.7913	736.4848	529.92926	1378.4615	970.57916	698.28156	524.54425	748.3241	1177.0083
"1556952_at"	110.11046	520.8358	133.15695	286.9457	266.8908	371.4213	446.49863	772.4108	529.6765	577.24274
"1556954_at"	773.7403	561.44385	366.35672	399.3395	506.1866	548.0787	569.9027	420.1206	472.933	235.79468
"1556956_at"	1404.6257	1036.8428	2177.795	1232.7732	1733.4204	1600.0145	1871.1738	737.8482	1269.1726	914.84424
"1556958_at"	509.26288	411.53333	535.63916	338.157	515.9375	362.137	598.16345	525.7855	745.04474	891.25244
"1556959_at"	2592.767	710.16486	2695.852	1722.9348	2112.3276	2074.347	649.66077	491.99982	1098.4655	1114.204
"1556960_a_at"	80.29331	79.47062	89.774826	67.883835	75.62687	88.468895	147.04688	65.53117	81.42887	44.531563
"1556962_at"	133.18472	559.5526	204.43285	95.073906	220.85544	669.7902	203.87976	266.59476	359.38434	807.8223
"1556963_at"	573.15686	366.30835	899.7949	665.9853	518.1779	897.7577	648.87775	650.8378	790.70294	384.56924
"1556964_s_at"	92.93786	211.04852	489.44632	192.8284	520.77795	319.13086	72.688324	362.8028	397.47586	326.7017
"1556967_at"	32.362793	21.607746	30.050781	26.004921	22.501818	19.621986	70.23015	13.421499	16.625235	17.007952
"1556969_at"	61.782455	39.011093	119.71187	59.450745	208.50606	88.04375	69.26248	51.18524	137.06035	69.9264
"1556970_at"	786.22266	336.53366	387.02377	574.7127	744.2358	1004.5155	572.1034	316.21634	245.53493	137.51985
"1556971_a_at"	553.9417	170.9837	1232.1049	1320.8309	1481.9247	928.1331	1515.121	323.4604	284.42676	313.83777
"1556972_at"	418.43427	345.60388	1059.6698	388.07437	151.17326	231.47139	258.37708	64.44318	468.92987	275.27417
"1556976_s_at"	1323.0273	1104.2994	1848.4547	910.477	1010.34753	1220.6207	707.36346	934.81836	1304.3248	1116.6179
"1556978_a_at"	1107.7109	376.86902	262.7261	913.0455	510.45807	650.83295	1031.0977	265.79535	649.9138	788.7045
"1556980_at"	33.085293	36.59497	94.11745	37.832882	65.32801	47.766197	49.1277	28.488983	81.62291	522.1598
"1556982_at"	1312.4855	1046.2262	1642.4202	1340.4886	806.06116	749.4939	957.16345	619.40094	760.8296	1410.3694
"1556983_a_at"	965.3903	258.5423	1060.6134	524.2462	846.1678	688.45575	722.38794	353.19397	543.24133	32.365784
"1556984_at"	1160.6261	876.3969	1322.067	758.8864	1343.3163	1490.8496	406.1487	810.21875	829.4317	1401.6069
"1556985_at"	114.91114	78.178825	231.36836	262.75046	188.68819	217.46248	122.02187	171.06331	66.97925	1051.3479
"1556986_at"	805.43726	471.17813	747.51996	288.65668	673.96014	561.74615	705.3468	305.76816	242.52986	249.99069
"1556987_s_at"	170.76794	100.0414	182.02533	157.0031	318.9509	154.91338	279.9119	93.85249	135.95082	201.7359
"1556988_s_at"	5734.4404	3482.3252	5301.0537	7573.8486	5434.3975	3170.032	5205.0635	4800.8037	2243.2024	7425.923
"1556989_at"	1207.9894	720.48975	852.6599	278.76886	738.9493	710.1258	351.7177	87.74996	203.35977	428.29846
"1556990_at"	18.823744	29.950256	184.36911	164.21426	51.95817	90.619415	135.94954	174.43938	58.508217	39.98951
"1556992_at"	203.61891	138.8392	307.65668	585.09937	625.5996	436.02206	266.88486	52.296135	144.52554	233.9659
"1556994_at"	285.5971	219.73761	764.85406	704.61694	1047.683	269.67093	162.3505	465.589	283.1341	291.70807
"1556996_at"	48.917934	15.974638	269.8338	116.04917	213.09752	73.55869	118.406265	21.877443	56.665794	15.485055
"1556997_a_at"	627.3303	124.995674	1405.8115	888.6196	897.4504	1162.3691	1028.6284	256.74042	83.32597	249.14095
"1556999_at"	160.9778	364.4646	800.53986	903.9577	646.6909	522.51587	1179.208	60.342052	532.0703	390.25958
"1557000_at"	1265.9855	845.9358	1047.5465	1124.1898	1425.743	1314.8015	1746.6439	1130.9457	920.16003	871.15247
"1557002_x_at"	1484.3176	589.82355	573.3177	366.70316	521.98834	334.0662	581.10443	434.9468	540.41376	122.632065
"1557003_at"	783.9762	1257.6676	835.4544	1077.2344	644.23517	1308.6542	276.3125	439.98447	229.10255	607.0744
"1557004_at"	47.262943	197.34808	626.3971	114.04009	661.4272	108.41412	835.6508	95.39159	721.8101	100.08484
"1557007_a_at"	252.96274	111.329834	684.9452	320.71515	589.98535	665.33215	969.56885	65.837746	315.4073	205.65663
"1557008_at"	1408.5728	1153.0118	1724.753	1067.269	2479.359	1025.4525	1691.1031	1009.2753	1395.1652	769.10547
"1557009_a_at"	41.784164	13.66714	72.343925	19.182774	115.73073	28.785074	387.88477	24.846409	32.403236	11.31223
"1557012_a_at"	292.48557	214.89189	333.90686	413.52692	261.52704	498.73148	115.02079	18.411217	51.511707	518.085
"1557014_a_at"	289.35812	534.4406	754.4044	1270.351	1090.3585	370.95447	698.309	9.157165	9.965473	18.045927
"1557016_a_at"	631.7435	425.53775	146.2622	397.63837	596.05475	652.09174	556.9704	416.33722	499.1797	218.35321
"1557017_at"	88.370316	8.251393	10.890791	23.011782	26.4894	15.75203	19.344128	62.73335	44.352036	11.945678
"1557018_a_at"	431.06155	397.99634	134.80939	395.21008	561.7256	369.04883	458.81052	308.981	189.57285	271.74127
"1557021_s_at"	858.18787	580.9171	750.1779	481.48468	752.27734	433.60526	685.0682	295.1624	331.07507	636.9858
"1557022_at"	83.69883	300.1496	202.37964	59.176586	965.0485	899.2248	1023.7971	59.008472	109.3374	105.67948
"1557024_at"	194.20609	260.07755	43.866627	149.77122	249.12132	450.63013	188.3518	173.69298	245.11047	221.30353
"1557025_a_at"	713.66455	739.74255	1127.5374	751.9471	1553.53	220.94304	745.3061	308.83295	564.4797	511.00986
"1557026_at"	409.6136	442.62842	227.8195	188.60835	1002.44727	173.37387	271.8192	169.89867	393.4086	632.95825
"1557027_at"	121.48455	218.32578	222.66751	94.08932	151.91084	100.75619	268.13232	258.73456	95.11707	14.188349
"1557029_at"	359.59827	54.027008	80.42799	223.36086	132.11359	421.63025	56.430824	386.08072	213.43738	300.92114
"1557030_at"	129.34593	22.841032	319.65753	16.362581	68.81718	133.99397	71.90209	50.93136	53.618317	162.19437
"1557031_at"	117.20857	96.6507	494.02405	241.10513	358.54953	102.57685	119.710526	49.708725	247.79758	292.6328
"1557034_s_at"	271.72763	139.28561	217.55873	186.22208	270.53604	607.4247	250.93903	627.926	484.25867	117.481895
"1557036_at"	726.2672	269.3537	519.5265	271.13998	578.67896	841.47284	435.62018	1442.3132	1117.1686	587.4318
"1557037_a_at"	534.11115	389.28693	63.977108	432.92288	101.4159	80.1211	108.807076	171.97653	234.75525	405.0989
"1557038_s_at"	216.54752	733.6162	1087.3121	501.4156	513.0529	429.92957	575.89777	623.7561	618.7193	1130.9446
"1557042_at"	274.6709	371.25452	982.6315	116.864136	382.17133	165.66489	173.2087	193.88501	647.3508	419.96805
"1557044_at"	677.3065	334.57718	1061.157	451.33096	836.56116	751.6997	733.67065	129.36215	61.63057	421.11505
"1557046_x_at"	410.02252	434.45197	680.4097	426.3986	865.4604	761.79834	770.9235	277.97342	337.06015	583.2504
"1557047_at"	2102.2964	1808.2103	3529.292	1707.9642	2485.9841	1691.6191	2609.0059	1099.7905	1681.6663	1592.0735
"1557049_at"	4412.0605	1086.0474	3846.5469	1609.8558	6008.9385	3812.4678	3656.4119	1631.3851	1924.5256	1270.5428
"1557050_at"	72.36435	11.519958	150.61667	153.12581	48.53998	10.917413	155.61848	74.62799	90.58792	110.56198
"1557051_s_at"	270.22314	220.8498	357.97223	225.57982	122.75668	387.57794	290.6802	197.25996	332.75278	136.2501
"1557052_at"	256.9957	133.3559	534.08167	29.39633	68.8802	64.85706	236.81247	50.517994	30.215149	209.17747
"1557053_s_at"	2976.7134	4908.0825	3028.2795	4301.8706	3151.167	3072.7556	2017.6072	4443.907	3425.6091	3917.0146
"1557055_s_at"	15203.232	8681.044	14655.939	6919.3174	14622.719	9899.224	9007.924	2824.93	2377.1238	12132.807
"1557056_at"	109.49902	127.36755	478.14426	488.95828	744.63385	171.04448	141.85753	65.23688	327.97302	248.18982
"1557057_a_at"	239.41858	126.16617	160.14919	354.5382	46.807747	225.17212	12.634037	11.06469	324.5893	112.86489
"1557059_at"	1269.4498	1451.7969	1291.3203	1187.6658	1686.9594	1122.0354	1452.7788	683.01135	1131.9716	973.38586
"1557060_at"	488.25693	487.64	289.5919	381.82632	342.77127	80.999916	571.3695	322.03568	571.0314	136.95636
"1557062_at"	397.17157	358.8924	390.3236	429.79016	451.71423	418.10556	272.68042	324.86438	297.30682	403.56836
"1557063_at"	509.8473	700.27594	547.06116	374.31665	906.20764	128.52649	713.1261	509.09457	563.5804	925.803
"1557064_s_at"	1875.3307	1255.3344	1608.446	1500.2849	2193.0447	2150.4224	1775.0187	643.7574	1133.6375	3117.7312
"1557065_at"	3296.364	2788.8801	2615.783	2101.7148	2436.4258	2966.2112	1441.439	1720.2251	1246.48	5182.9395
"1557066_at"	530.66296	642.9191	702.47424	675.9136	548.11005	787.15875	337.33612	364.57812	366.01642	1441.6516
"1557067_s_at"	4369.619	6203.419	4181.0786	3762.0823	3780.9805	4334.221	3070.3164	4639.327	3855.0566	4297.972
"1557068_at"	86.36427	22.047932	43.29312	58.65156	157.87744	43.723305	55.51259	77.47533	40.272434	14.1501875
"1557070_at"	368.75006	347.98654	685.5681	497.6841	1011.69116	83.24949	391.3762	447.4266	573.1345	693.00446
"1557071_s_at"	731.8233	634.7735	507.8045	563.5336	128.40013	784.461	448.14816	222.86615	679.3183	1601.0066
"1557073_s_at"	4300.166	2935.7356	4265.3193	4677.2935	5329.005	3999.6394	3730.8176	2688.4832	2261.4043	6233.9233
"1557077_a_at"	970.7851	670.4704	496.21017	698.6091	1353.333	928.58203	1001.64044	1099.1438	1238.746	728.20544
"1557078_at"	245.63667	457.94186	112.94302	325.76068	284.6076	146.56702	192.36551	1474.8645	3157.104	17.892187
"1557079_at"	127.311745	306.1508	396.1737	154.77489	296.68936	36.261494	157.33824	80.35473	377.8231	22.15749
"1557080_s_at"	862.0601	664.8538	636.08264	1168.114	561.928	1854.0674	1475.705	181.22531	239.41887	731.04987
"1557081_at"	4214.006	3529.8096	3778.4353	1771.7057	3325.3372	1962.1632	2134.911	2819.4814	1762.6158	10892.173
"1557085_at"	30.050812	83.516	257.77673	82.05119	158.77495	126.2488	112.86336	32.91587	97.449356	135.55116
"1557089_at"	721.35736	2642.3506	473.97223	874.2651	956.7738	832.0259	1066.4669	316.23285	467.68756	6119.8394
"1557091_at"	1358.3922	256.40204	3201.3733	1487.5295	2302.116	2061.6753	2180.0325	1476.2247	534.84644	1875.6895
"1557094_at"	246.25523	159.58455	373.21756	161.63934	103.97317	108.80613	458.04068	91.04774	18.330492	409.85205
"1557098_s_at"	3887.7942	1553.8085	2490.945	4278.064	191.0271	2427.1907	859.7645	44.722523	71.62467	163.19366
"1557099_at"	722.6536	867.2797	356.42926	610.9928	1241.9757	690.09625	458.28674	78.35524	30.073769	1367.0403
"1557100_s_at"	4502.875	3198.5032	1121.9401	2039.1499	1720.1173	1525.8544	2377.3008	2192.0652	3106.3196	2762.7488
"1557103_a_at"	3592.1985	1602.8433	3319.981	3479.447	3200.728	2694.1055	2836.707	1431.912	1408.3307	1243.0905
"1557104_at"	359.04684	57.505142	97.859634	172.68579	51.720955	337.6721	279.05176	110.566536	259.34613	124.712685
"1557105_a_at"	128.0744	200.93053	126.36298	140.98856	107.09189	110.22497	186.21439	99.01798	58.041965	348.70087
"1557107_at"	720.8307	348.3114	299.21768	162.18913	399.05615	99.83417	270.4608	19.05989	191.93967	362.5869
"1557112_a_at"	1735.2018	1607.4928	2476.9875	2120.4934	2268.4727	1958.9169	2654.8494	1370.9684	1116.1698	1774.2137
"1557113_at"	1168.9918	530.0594	685.70404	1855.221	1113.7671	1160.8583	1168.0138	329.76688	468.8567	348.95914
"1557114_a_at"	1736.6189	2202.7522	1920.7877	1283.3009	1736.1686	2298.5676	1856.7603	651.8718	1528.518	2261.9697
"1557116_at"	1773.9264	1177.1646	1925.4653	2301.851	1992.9904	1713.3561	1734.5747	1549.0792	1642.9315	1242.4615
"1557117_at"	585.00867	458.46558	131.2091	595.2983	310.6576	224.73566	130.90076	136.60533	35.921413	535.0833
"1557118_a_at"	1091.5985	583.3787	1188.6334	699.96576	348.2973	903.45026	409.4462	22.751244	396.70032	1090.9756
"1557119_a_at"	2537.304	3912.2634	3199.5813	1695.6539	1945.6791	2209.2878	2044.1606	410.6396	584.689	1728.1602
"1557120_at"	748.2286	594.8696	1276.3407	727.9884	1151.6855	1684.1693	906.82153	935.1991	708.2208	745.9324
"1557121_s_at"	2618.8433	1827.4244	3153.2568	3056.3003	2662.2163	2859.947	3159.2732	1654.6888	2034.3853	2028.5354
"1557122_s_at"	568.0683	737.56384	540.73126	464.49078	563.2942	797.7675	398.76605	203.15018	592.21936	4878.4375
"1557123_a_at"	1882.1001	833.1795	1362.4156	1565.379	2011.5312	2064.4014	1656.2441	549.2833	818.0778	1059.3678
"1557124_at"	1286.5723	596.7694	1160.1403	995.1995	917.0599	1393.1938	969.10565	1324.2089	1572.8202	668.01855
"1557126_a_at"	98.84833	192.19833	549.87555	61.352306	273.3767	443.12842	111.608795	225.00194	298.66605	47.48974
"1557128_at"	101.33093	24.796185	158.52522	58.75409	430.21176	31.380215	84.28505	2022.303	1929.6052	18.475378
"1557129_a_at"	40.66996	279.27637	358.3122	115.72048	376.78967	333.56702	277.13852	1929.4696	1325.7672	20.703314
"1557131_at"	123.76185	75.50136	779.8176	240.54794	1077.7267	274.2683	958.8661	37.43068	78.50682	61.740364
"1557132_at"	1342.3768	2081.4387	2153.0273	1943.3896	1792.8048	1223.8948	1651.6752	175.0706	181.58801	5220.771
"1557133_at"	1083.2225	1542.6158	1354.1818	1560.0502	3077.9316	1174.979	1119.381	36.958633	65.65434	6588.629
"1557135_at"	618.0537	514.8847	1012.4893	416.59476	712.462	939.9177	1061.5226	371.0269	835.2788	442.82352
"1557136_at"	440.8593	274.11185	368.36075	241.056	120.726494	156.65218	786.0016	169.97827	334.29416	306.88382
"1557137_at"	11764.609	7556.6445	8573.218	13498.889	9599.499	9616.323	10440.277	1089.2908	763.224	9088.161
"1557139_at"	77.81599	16.131348	57.50514	148.77675	165.02559	79.9611	434.64453	155.41997	135.25092	28.438364
"1557141_at"	2160.4814	1696.4906	3260.6306	2280.9905	3533.4158	2068.2676	2768.6104	931.3633	1092.1992	830.4553
"1557143_at"	856.6417	393.70016	1011.00726	820.1231	1485.7328	1389.4211	950.6818	395.5654	778.7302	2598.2847
"1557145_at"	672.60974	413.37506	827.43884	408.27344	1210.7931	761.00085	544.23083	893.4296	641.47784	335.24
"1557146_a_at"	231.89258	71.04455	206.65948	173.631	198.89453	106.79852	115.97412	91.81692	159.81485	1221.9896
"1557147_a_at"	138.7767	91.22735	393.5838	512.9167	206.80305	321.207	330.6022	428.9025	573.2338	331.789
"1557148_at"	264.9811	896.17975	503.9765	706.2376	1181.1467	468.71326	557.82117	88.35025	276.53687	602.2315
"1557149_at"	569.237	525.51495	762.71155	83.60394	594.12897	397.719	481.95648	326.1745	334.03073	770.3892
"1557151_at"	38.03359	51.29199	61.929966	112.60655	35.328068	54.896774	101.14906	23.247906	47.393986	30.761124
"1557154_at"	460.58148	307.99966	513.4317	463.12524	155.19597	273.2602	247.68822	95.54071	490.92145	628.66223
"1557155_a_at"	67.18156	160.69762	393.44788	33.50576	475.0246	292.0211	676.7906	191.06848	373.42218	28.915783
"1557158_s_at"	2276.9058	1661.6584	1810.4204	1661.1489	3203.5042	2316.9226	1519.1028	1132.5658	1157.843	824.6872
"1557161_at"	76.001175	138.00151	46.302277	43.367374	173.88373	541.9161	280.79468	36.89444	64.23616	15.891813
"1557162_at"	726.3608	100.193085	874.40674	428.2856	227.43517	1003.4709	678.57043	259.62012	147.49245	86.17079
"1557164_a_at"	185.63852	145.03867	218.54765	117.1339	253.04033	91.15908	235.00873	458.20142	164.6116	134.92883
"1557165_s_at"	1336.4849	879.3463	3116.3882	2521.4675	2384.822	2149.9548	2078.7517	1899.4702	1773.4407	2878.8289
"1557166_at"	456.39224	296.15555	558.174	543.4753	962.5214	244.5398	285.99475	459.94708	562.367	672.72754
"1557167_at"	27.989878	53.02458	213.1967	709.4003	24.001068	62.27553	67.118866	321.76532	344.1945	38.93948
"1557169_x_at"	399.18457	312.71585	338.27765	494.99045	341.8563	495.49432	212.18419	317.41928	455.31305	318.76715
"1557170_at"	568.01874	1068.8529	1094.6824	652.46936	1069.782	617.0245	1291.3759	552.1704	909.84753	1163.1418
"1557172_x_at"	582.7749	1230.7196	909.2504	1535.811	1094.3677	1670.1624	407.58575	542.0774	474.62155	1328.9723
"1557174_a_at"	2876.5852	2295.1047	2698.727	2534.7065	2699.8684	2328.938	2286.1064	803.7847	296.67053	1760.0541
"1557176_a_at"	812.06915	2937.6218	695.52386	320.1134	109.435555	924.11194	168.22722	173.20824	466.7681	2797.138
"1557177_at"	312.26538	222.58395	121.08498	201.49455	340.128	401.79788	572.1717	179.67632	272.10703	76.82974
"1557179_s_at"	417.49887	960.68225	882.83905	509.82404	111.37416	809.5331	193.53989	333.9812	56.571922	1043.5695
"1557180_at"	354.06522	28.509535	233.80997	199.88507	177.31729	435.15024	299.01764	10.585642	223.8226	261.22858
"1557181_s_at"	194.0403	122.85009	61.749676	392.1417	350.74326	2095.1594	784.62024	47.412697	42.976048	655.9185
"1557185_at"	1415.5786	756.6107	878.96497	366.47055	678.6381	1207.6813	697.5072	537.7194	621.04755	321.12762
"1557186_s_at"	1702.5249	2219.1702	1251.6011	603.24255	1206.3408	892.33606	773.74347	1349.1516	3345.8782	1547.8754
"1557189_at"	1529.7798	830.5996	1069.4525	973.01733	1038.0343	1304.7048	986.68665	679.1651	1130.2324	1028.1622
"1557190_at"	1076.3461	1244.8395	548.1825	477.24835	351.609	1001.505	1081.5023	530.8461	403.95233	739.81525
"1557192_at"	953.2277	807.697	1890.4739	1044.6176	1284.6344	962.3188	624.2089	684.61945	1113.2687	1145.1764
"1557193_at"	1329.9852	2449.8855	1801.6813	919.41187	2001.9691	1210.0974	1158.704	1295.8025	1238.8943	3581.068
"1557194_a_at"	1482.5662	1148.7493	1904.1527	1262.9467	1981.9276	1035.0547	2082.6333	472.87872	985.2892	1009.71606
"1557195_at"	428.80444	295.0708	18.945406	512.9245	523.8285	196.94835	123.20753	233.69778	55.500183	302.83038
"1557196_a_at"	1340.423	1077.2072	1194.0835	1423.6427	1446.1519	1650.8783	818.5766	515.432	827.7001	990.8179
"1557197_a_at"	422.89597	72.53596	566.93036	100.15177	326.80606	48.26187	120.425804	401.34186	530.92145	271.53162
"1557203_at"	1348.902	815.7516	1606.8015	2995.7507	4116.5366	3201.8	3370.8254	510.29202	815.4425	639.7373
"1557206_at"	178.17464	235.61255	465.70743	33.032696	58.77825	236.7452	62.99843	116.07995	112.16614	7.4781966
"1557207_s_at"	1564.5265	382.83798	1147.1226	1294.4196	1174.7582	994.3447	1317.2334	500.76266	776.1737	1218.561
"1557208_at"	323.29257	194.3806	186.15701	528.54285	769.01965	223.6902	165.41537	115.981735	21.569443	143.81285
"1557211_a_at"	92.6777	118.650185	301.78427	170.73338	339.1319	118.53245	120.67347	241.10686	504.32092	135.30537
"1557212_at"	833.99384	429.70758	367.68344	914.4985	949.63513	1484.7839	580.61334	479.94254	649.29584	863.2913
"1557214_at"	130.3434	48.369583	42.898216	106.1628	202.6413	120.78861	177.77444	32.38819	102.046394	229.02652
"1557215_at"	71.09053	140.19972	347.2242	610.0892	64.13531	143.30637	226.31929	39.580864	38.086975	54.385437
"1557217_a_at"	25.304892	195.10675	182.88104	91.54982	187.45427	164.91292	190.65286	1218.1024	1373.4181	5.1332974
"1557218_s_at"	40.20303	35.026405	52.500298	36.972763	69.16134	37.605682	101.024086	1619.5106	1623.2241	24.259125
"1557219_at"	193.94069	142.62465	236.71956	90.86501	512.6085	77.69753	676.5768	252.56023	591.0461	499.10355
"1557222_at"	1513.818	5359.978	1900.5555	1187.3168	1627.9124	1106.2158	1441.4818	189.46588	176.75523	1304.1027
"1557223_at"	814.8756	291.58972	1195.5862	618.5394	974.0976	921.6887	810.6474	594.4339	319.12286	492.2965
"1557224_at"	1437.718	977.8835	1484.8009	1301.3307	2397.6975	1512.5297	1607.2583	529.88104	547.4086	2381.9707
"1557225_at"	303.96432	89.09705	134.0168	108.17469	180.45403	139.21506	95.71411	67.25195	128.56287	53.080482
"1557226_a_at"	95.22568	97.06255	548.7131	115.11822	378.27258	147.06754	233.27362	52.492054	521.3973	85.603386
"1557227_s_at"	2043.7164	3407.5857	2269.275	2339.3257	2270.9048	2066.9248	2081.9167	5242.579	4554.62	1980.514
"1557228_at"	1713.2007	1583.2004	1292.5463	1633.6833	1735.5416	1476.5797	1116.1152	1758.5935	1832.4745	1480.0271
"1557232_at"	2837.0623	1241.2515	2416.3103	2534.1938	2480.8008	2639.1934	1671.0143	351.2323	649.0133	1623.2394
"1557233_at"	202.39606	45.21034	339.81796	499.21924	366.40775	406.9037	149.89607	368.51144	328.77792	42.75703
"1557235_at"	251.4187	271.9281	191.91154	187.4202	183.17924	33.265923	97.00522	196.63025	62.89905	71.24429
"1557236_at"	505.15836	268.61008	267.4258	522.8871	626.88763	117.55395	516.64886	654.1834	424.22833	345.40854
"1557238_s_at"	763.0638	175.8555	1019.6687	326.08194	824.43823	681.8541	687.46027	590.21185	221.13878	1483.368
"1557239_at"	631.4583	697.46	1065.3611	92.48643	245.2187	282.9214	90.92553	256.12537	104.185905	707.6533
"1557240_a_at"	786.2842	1025.234	1322.9884	618.7646	808.7465	625.9607	758.665	463.92374	465.33167	687.2273
"1557241_a_at"	505.67035	260.87363	321.6936	218.26956	564.7172	275.65683	310.75317	560.3549	742.3679	216.98882
"1557242_at"	553.6364	398.0878	393.04755	82.30981	127.05463	231.2347	322.22098	1525.9338	1439.1487	587.9341
"1557244_a_at"	485.6557	578.57074	526.5896	386.31036	452.57938	481.8802	728.8694	130.846	310.9284	676.23175
"1557246_at"	1406.5122	1240.571	1272.4354	384.51727	841.23145	951.5661	534.34076	446.94696	633.30963	1859.727
"1557248_at"	1023.8383	97.732956	984.6426	611.29016	544.4277	993.4742	523.8583	110.11673	465.77838	941.2958
"1557252_at"	465.03415	74.457664	647.45154	488.63828	1014.5774	908.0305	684.00867	408.0999	712.0476	1034.3962
"1557256_a_at"	610.11	5290.2007	1034.8046	308.00473	28.700584	268.72372	984.28864	37.320362	165.0031	9114.724
"1557257_at"	443.5647	214.74893	716.2673	450.79736	636.7184	608.03394	195.90074	387.70398	286.13327	354.53583
"1557258_a_at"	1272.972	1224.2277	2065.946	1689.2444	2854.7944	1657.2008	1217.282	1470.1403	2082.0344	1562.7284
"1557260_a_at"	1387.1501	605.8965	877.6241	893.37885	663.05084	659.00085	922.6665	401.24478	255.78433	1242.4928
"1557261_at"	3513.0662	1083.3512	2744.425	2536.7415	3926.6826	3307.2983	1587.7788	912.50574	616.72864	1965.0887
"1557262_at"	315.9755	320.76187	280.5832	243.3304	635.9831	506.61728	620.3915	416.26428	376.97464	1033.4705
"1557263_s_at"	284.2424	363.31445	329.27972	291.2438	485.1182	287.39612	435.47797	445.62473	167.98311	1953.1781
"1557265_at"	3358.6753	1385.0577	5026.0015	2809.2178	4534.006	2664.9321	2654.6692	688.9293	640.42303	1365.2731
"1557267_s_at"	453.53497	241.1121	160.09904	146.19386	337.97162	135.72583	164.31671	734.17444	389.96204	175.78543
"1557270_at"	467.90582	341.36392	499.78635	411.02917	1078.0323	992.1551	593.75934	929.6214	653.1882	949.4078
"1557274_at"	744.0795	657.07764	832.0459	709.2323	487.61755	868.90186	772.7049	92.163574	401.84473	562.7313
"1557275_a_at"	1009.14166	679.6966	824.6505	1015.06226	2038.5458	1049.9722	1281.7008	530.1808	450.66333	252.73465
"1557276_at"	2628.7695	1264.3586	2797.953	1073.7489	1881.5505	1116.1661	3867.8389	900.2434	1394.2634	1524.2557
"1557277_a_at"	113.81685	248.71622	154.589	228.94391	298.56943	107.31355	243.5828	10.790738	271.66174	212.08691
"1557278_s_at"	610.46906	333.00394	778.0736	206.82664	258.05963	564.59534	271.8276	402.4831	412.33795	683.9545
"1557279_at"	1257.4935	1321.5875	1758.2914	2181.9966	1979.7683	1353.847	2080.3154	614.15125	823.8014	1486.1383
"1557280_s_at"	521.2766	803.5681	519.7934	1255.9048	832.7891	930.9864	765.03394	167.8918	206.96146	877.7943
"1557283_a_at"	108.70705	149.11246	520.8409	529.27795	289.3863	638.16156	568.0558	709.65826	632.9673	505.09723
"1557285_at"	62.19358	106.11061	33.498245	74.74405	85.0256	24.520174	66.718666	33.05442	205.5811	4.5927796
"1557286_at"	644.30066	589.40906	605.9801	440.0034	110.95905	69.93088	703.8373	1014.6459	2391.9746	472.13925
"1557287_at"	661.51324	45.522675	534.567	135.84698	133.89296	246.0185	63.085632	104.300674	151.34396	43.91029
"1557289_s_at"	1337.2383	1001.1066	1202.0852	463.75833	1704.6888	1004.2244	653.2508	418.54916	575.0871	2616.1594
"1557290_at"	89.55507	32.99932	67.853775	45.29003	115.38366	317.93857	112.295555	33.279465	259.6746	224.69383
"1557292_a_at"	1175.7104	306.11566	667.4278	916.85425	1133.3195	591.9816	810.33887	342.96646	736.9923	639.6851
"1557293_at"	544.04144	1089.798	950.9721	205.04433	967.99384	698.3499	352.22397	404.5284	510.84998	1160.778
"1557295_a_at"	26.887041	19.022482	383.58713	55.587784	73.48646	81.166275	41.931503	323.60635	21.634533	162.415
"1557296_at"	42.779167	173.05327	45.626347	42.66197	279.58344	158.85783	48.473484	32.129482	210.84848	50.88112
"1557297_at"	134.12721	50.013783	132.16966	46.34693	88.756004	208.5513	94.24394	74.91745	455.9484	24.723932
"1557300_s_at"	702.40936	856.39813	776.2706	1109.2692	1001.755	1080.4651	705.1816	716.7197	613.1065	3332.2085
"1557301_a_at"	23.358013	139.87973	28.87437	86.828674	102.31807	87.04296	79.93414	181.54082	254.93134	53.98932
"1557302_at"	2377.3257	3017.9822	3660.391	3173.2227	2997.0337	3361.3586	3264.4072	1796.1063	1312.5386	4234.124
"1557303_at"	804.6651	391.85165	184.48805	620.6289	250.08441	779.334	515.07825	1051.9089	1036.0065	577.34406
"1557305_at"	587.2117	453.1798	651.7911	290.52118	599.23206	573.8201	161.81256	297.54477	633.15265	501.28598
[truncated: 5,573,073 more chars]
