# Supplementary material for: Corrigendum to “Identification of Differentially Expressed Genes in Pituitary Adenomas by Integrating Analysis of Microarray Data”
Source: Int J Endocrinol. 2018 Sep 6;2018:6069189. doi: 10.1155/2018/6069189 (PMC6146651; doi:10.1155/2018/6069189)
Supplement: Supplementary 1 — The raw data of the included datasets downloaded from GEO database. [file 6069189.f1.zip › row data_GSE22812_series_matrix.txt]

!Series_title	"Transcriptomic dysregulation in aggressive and malignant prolactin tumours"
!Series_geo_accession	"GSE22812"
!Series_status	"Public on Mar 16 2011"
!Series_submission_date	"Jul 08 2010"
!Series_last_update_date	"Oct 28 2014"
!Series_pubmed_id	"21251114"
!Series_summary	"Pituitary tumours are generally benign. However, many are invasive and some of these are aggressive with high proliferation and recurrence rates. Only metastatic tumours are considered malignant and are rare (0.2%). To identify molecular events associated with the aggressive and malignant phenotypes, we combined a comparative genomic hybridization and transcriptomic analysis of 13 prolactin (PRL) tumours classified as non-invasive (NI; n=5), invasive (I; n=2) or aggressive-invasive (AI; n=6). Each tumour showed copy number alterations which appeared to be varied and discrete in the NI and I tumour groups, and more numerous and extensive in the AI tumour group. Allelic loss within the p arm region of chromosome 11 was detected in five of the AI tumours. This region contains the cytobands 11p15.2, 11p15.1, 11p14.3, 11p14.2, 11p14.1, 11p13, 11p12 and 11p11.2. Furthermore, an allelic loss in the 11q arm was also observed in three of these five tumours, which were considered malignant based on the presence of metastases. The comparison of genomic and transcriptomic data showed that allelic loss impacted upon the expression of genes located in the imbalanced region. An original data filtering strategy allowed us to highlight five genes (DGKZ, CD44, TSG101, GTF2H1 and HTATIP2), within the missing 11p region, potentially responsible for triggering the aggressive and malignant phenotypes of PRL tumours. Our novel combined genomic and transcriptomic analysis underlines the importance of chromosome 11 allelic loss in aggressive and malignant PRL tumours and led us to propose a new strategy to find markers of progression in rare tumours."
!Series_overall_design	"Transcriptomic analysis of Codelink Human Whole Genome Bioarray was performed for 13 prolactin tumors: 6 aggressive-invasive, 2 invasive, and 5 non-invasive."
!Series_type	"Expression profiling by array"
!Series_contributor	"Anne,,WIERINCKX"
!Series_contributor	"Magali,,ROCHE"
!Series_contributor	"Catherine,,LEGRAS-LACHUER"
!Series_contributor	"Nicolas,,NAZARET"
!Series_contributor	"Séverine,,CROZE"
!Series_contributor	"Gérald,,RAVEROT"
!Series_contributor	"Catherine,,REY"
!Series_contributor	"Carole,,AUGER"
!Series_contributor	"Emmanuel,,JOUANNEAU"
!Series_contributor	"Philippe,,CHANSON"
!Series_contributor	"Jacqueline,,TROUILLAS"
!Series_contributor	"Joël,,LACHUER"
!Series_sample_id	"GSM563806 GSM563807 GSM563808 GSM563809 GSM563810 GSM563811 GSM563812 GSM563825 GSM563826 GSM563829 GSM563834 GSM563837 GSM563844 "
!Series_contact_name	"Joël,,LACHUER"
!Series_contact_email	"lachuer@univ-lyon1.fr"
!Series_contact_phone	"04 72 91 34 93"
!Series_contact_department	"U842"
!Series_contact_institute	"INSERM"
!Series_contact_address	"16 avenue du Doyen Lépine"
!Series_contact_city	"BRON"
!Series_contact_zip/postal_code	"69676"
!Series_contact_country	"France"
!Series_platform_id	"GPL2895"
!Series_platform_taxid	"9606"
!Series_sample_taxid	"9606"
!Series_relation	"SubSeries of: GSE32191"
!Series_relation	"BioProject: https://www.ncbi.nlm.nih.gov/bioproject/PRJNA153907"

!Sample_title	"prolactin pituitary tumours_agressive-invasive_1"	"prolactin pituitary tumours_agressive-invasive_6"	"prolactin pituitary tumours_agressive-invasive_3"	"prolactin pituitary tumours_non-invasive_11"	"prolactin pituitary tumours_invasive_8"	"prolactin pituitary tumours_agressive-invasive_4"	"prolactin pituitary tumours_invasive_7"	"prolactin pituitary tumours_agressive-invasive_2"	"prolactin pituitary tumours_non-invasive_12"	"prolactin pituitary tumours_non-invasive_13"	"prolactin pituitary tumours_non-invasive_10"	"prolactin pituitary tumours_non-invasive_9"	"prolactin pituitary tumours_agressive-invasive_5"
!Sample_geo_accession	"GSM563806"	"GSM563807"	"GSM563808"	"GSM563809"	"GSM563810"	"GSM563811"	"GSM563812"	"GSM563825"	"GSM563826"	"GSM563829"	"GSM563834"	"GSM563837"	"GSM563844"
!Sample_status	"Public on Mar 16 2011"	"Public on Mar 16 2011"	"Public on Mar 16 2011"	"Public on Mar 16 2011"	"Public on Mar 16 2011"	"Public on Mar 16 2011"	"Public on Mar 16 2011"	"Public on Mar 16 2011"	"Public on Mar 16 2011"	"Public on Mar 16 2011"	"Public on Mar 16 2011"	"Public on Mar 16 2011"	"Public on Mar 16 2011"
!Sample_submission_date	"Jul 08 2010"	"Jul 08 2010"	"Jul 08 2010"	"Jul 08 2010"	"Jul 08 2010"	"Jul 08 2010"	"Jul 08 2010"	"Jul 08 2010"	"Jul 08 2010"	"Jul 08 2010"	"Jul 08 2010"	"Jul 08 2010"	"Jul 08 2010"
!Sample_last_update_date	"Sep 16 2011"	"Sep 16 2011"	"Sep 16 2011"	"Sep 16 2011"	"Sep 16 2011"	"Sep 16 2011"	"Sep 16 2011"	"Sep 16 2011"	"Sep 16 2011"	"Sep 16 2011"	"Sep 16 2011"	"Sep 16 2011"	"Sep 16 2011"
!Sample_type	"RNA"	"RNA"	"RNA"	"RNA"	"RNA"	"RNA"	"RNA"	"RNA"	"RNA"	"RNA"	"RNA"	"RNA"	"RNA"
!Sample_channel_count	"1"	"1"	"1"	"1"	"1"	"1"	"1"	"1"	"1"	"1"	"1"	"1"	"1"
!Sample_source_name_ch1	"agressive-invasive prolactin pituitary tumour"	"agressive-invasive prolactin pituitary tumour"	"agressive-invasive prolactin pituitary tumour"	"non-invasive prolactin pituitary tumour"	"invasive prolactin pituitary tumour"	"agressive-invasive prolactin pituitary tumour"	"invasive prolactin pituitary tumour"	"agressive-invasive prolactin pituitary tumour"	"non-invasive prolactin pituitary tumour"	"non-invasive prolactin pituitary tumour"	"non-invasive prolactin pituitary tumour"	"non-invasive prolactin pituitary tumour"	"agressive-invasive prolactin pituitary tumour"
!Sample_organism_ch1	"Homo sapiens"	"Homo sapiens"	"Homo sapiens"	"Homo sapiens"	"Homo sapiens"	"Homo sapiens"	"Homo sapiens"	"Homo sapiens"	"Homo sapiens"	"Homo sapiens"	"Homo sapiens"	"Homo sapiens"	"Homo sapiens"
!Sample_characteristics_ch1	"tissue: prolactin pituitary tumour"	"tissue: prolactin pituitary tumour"	"tissue: prolactin pituitary tumour"	"tissue: prolactin pituitary tumour"	"tissue: prolactin pituitary tumour"	"tissue: prolactin pituitary tumour"	"tissue: prolactin pituitary tumour"	"tissue: prolactin pituitary tumour"	"tissue: prolactin pituitary tumour"	"tissue: prolactin pituitary tumour"	"tissue: prolactin pituitary tumour"	"tissue: prolactin pituitary tumour"	"tissue: prolactin pituitary tumour"
!Sample_characteristics_ch1	"tumor stage: agressive-invasive"	"tumor stage: agressive-invasive"	"tumor stage: agressive-invasive"	"tumor stage: non-invasive"	"tumor stage: invasive"	"tumor stage: agressive-invasive"	"tumor stage: invasive"	"tumor stage: agressive-invasive"	"tumor stage: non-invasive"	"tumor stage: non-invasive"	"tumor stage: non-invasive"	"tumor stage: non-invasive"	"tumor stage: agressive-invasive"
!Sample_characteristics_ch1	"gender: male"	"gender: female"	"gender: male"	"gender: male"	"gender: male"	"gender: male"	"gender: male"	"gender: female"	"gender: female"	"gender: female"	"gender: female"	"gender: male"	"gender: female"
!Sample_biomaterial_provider_ch1	"Neurobiotec Banque (Hôpital Neurologique, 59 Boulevard Pinel 69677 Bron cedex, FRANCE)"	"Neurobiotec Banque (Hôpital Neurologique, 59 Boulevard Pinel 69677 Bron cedex, FRANCE)"	"Neurobiotec Banque (Hôpital Neurologique, 59 Boulevard Pinel 69677 Bron cedex, FRANCE)"	"Neurobiotec Banque (Hôpital Neurologique, 59 Boulevard Pinel 69677 Bron cedex, FRANCE)"	"Neurobiotec Banque (Hôpital Neurologique, 59 Boulevard Pinel 69677 Bron cedex, FRANCE)"	"Neurobiotec Banque (Hôpital Neurologique, 59 Boulevard Pinel 69677 Bron cedex, FRANCE)"	"Neurobiotec Banque (Hôpital Neurologique, 59 Boulevard Pinel 69677 Bron cedex, FRANCE)"	"Neurobiotec Banque (Hôpital Neurologique, 59 Boulevard Pinel 69677 Bron cedex, FRANCE)"	"Neurobiotec Banque (Hôpital Neurologique, 59 Boulevard Pinel 69677 Bron cedex, FRANCE)"	"Neurobiotec Banque (Hôpital Neurologique, 59 Boulevard Pinel 69677 Bron cedex, FRANCE)"	"Neurobiotec Banque (Hôpital Neurologique, 59 Boulevard Pinel 69677 Bron cedex, FRANCE)"	"Neurobiotec Banque (Hôpital Neurologique, 59 Boulevard Pinel 69677 Bron cedex, FRANCE)"	"Neurobiotec Banque (Hôpital Neurologique, 59 Boulevard Pinel 69677 Bron cedex, FRANCE)"
!Sample_molecule_ch1	"total RNA"	"total RNA"	"total RNA"	"total RNA"	"total RNA"	"total RNA"	"total RNA"	"total RNA"	"total RNA"	"total RNA"	"total RNA"	"total RNA"	"total RNA"
!Sample_extract_protocol_ch1	"Total RNA was extracted from the human pituitary tumours using Trizol (Invitrogen, Carlsbad, California, USA), according to the manufacturer’s protocol."	"Total RNA was extracted from the human pituitary tumours using Trizol (Invitrogen, Carlsbad, California, USA), according to the manufacturer’s protocol."	"Total RNA was extracted from the human pituitary tumours using Trizol (Invitrogen, Carlsbad, California, USA), according to the manufacturer’s protocol."	"Total RNA was extracted from the human pituitary tumours using Trizol (Invitrogen, Carlsbad, California, USA), according to the manufacturer’s protocol."	"Total RNA was extracted from the human pituitary tumours using Trizol (Invitrogen, Carlsbad, California, USA), according to the manufacturer’s protocol."	"Total RNA was extracted from the human pituitary tumours using Trizol (Invitrogen, Carlsbad, California, USA), according to the manufacturer’s protocol."	"Total RNA was extracted from the human pituitary tumours using Trizol (Invitrogen, Carlsbad, California, USA), according to the manufacturer’s protocol."	"Total RNA was extracted from the human pituitary tumours using Trizol (Invitrogen, Carlsbad, California, USA), according to the manufacturer’s protocol."	"Total RNA was extracted from the human pituitary tumours using Trizol (Invitrogen, Carlsbad, California, USA), according to the manufacturer’s protocol."	"Total RNA was extracted from the human pituitary tumours using Trizol (Invitrogen, Carlsbad, California, USA), according to the manufacturer’s protocol."	"Total RNA was extracted from the human pituitary tumours using Trizol (Invitrogen, Carlsbad, California, USA), according to the manufacturer’s protocol."	"Total RNA was extracted from the human pituitary tumours using Trizol (Invitrogen, Carlsbad, California, USA), according to the manufacturer’s protocol."	"Total RNA was extracted from the human pituitary tumours using Trizol (Invitrogen, Carlsbad, California, USA), according to the manufacturer’s protocol."
!Sample_label_ch1	"biotin"	"biotin"	"biotin"	"biotin"	"biotin"	"biotin"	"biotin"	"biotin"	"biotin"	"biotin"	"biotin"	"biotin"	"biotin"
!Sample_label_protocol_ch1	"Total RNA (2 µg) was amplified and biotin-labelled by a round of in vitro transcription (IVT) with a Message Amp aRNA kit (Ambion, Austin, Texas, USA) following the manufacturer’s protocol."	"Total RNA (2 µg) was amplified and biotin-labelled by a round of in vitro transcription (IVT) with a Message Amp aRNA kit (Ambion, Austin, Texas, USA) following the manufacturer’s protocol."	"Total RNA (2 µg) was amplified and biotin-labelled by a round of in vitro transcription (IVT) with a Message Amp aRNA kit (Ambion, Austin, Texas, USA) following the manufacturer’s protocol."	"Total RNA (2 µg) was amplified and biotin-labelled by a round of in vitro transcription (IVT) with a Message Amp aRNA kit (Ambion, Austin, Texas, USA) following the manufacturer’s protocol."	"Total RNA (2 µg) was amplified and biotin-labelled by a round of in vitro transcription (IVT) with a Message Amp aRNA kit (Ambion, Austin, Texas, USA) following the manufacturer’s protocol."	"Total RNA (2 µg) was amplified and biotin-labelled by a round of in vitro transcription (IVT) with a Message Amp aRNA kit (Ambion, Austin, Texas, USA) following the manufacturer’s protocol."	"Total RNA (2 µg) was amplified and biotin-labelled by a round of in vitro transcription (IVT) with a Message Amp aRNA kit (Ambion, Austin, Texas, USA) following the manufacturer’s protocol."	"Total RNA (2 µg) was amplified and biotin-labelled by a round of in vitro transcription (IVT) with a Message Amp aRNA kit (Ambion, Austin, Texas, USA) following the manufacturer’s protocol."	"Total RNA (2 µg) was amplified and biotin-labelled by a round of in vitro transcription (IVT) with a Message Amp aRNA kit (Ambion, Austin, Texas, USA) following the manufacturer’s protocol."	"Total RNA (2 µg) was amplified and biotin-labelled by a round of in vitro transcription (IVT) with a Message Amp aRNA kit (Ambion, Austin, Texas, USA) following the manufacturer’s protocol."	"Total RNA (2 µg) was amplified and biotin-labelled by a round of in vitro transcription (IVT) with a Message Amp aRNA kit (Ambion, Austin, Texas, USA) following the manufacturer’s protocol."	"Total RNA (2 µg) was amplified and biotin-labelled by a round of in vitro transcription (IVT) with a Message Amp aRNA kit (Ambion, Austin, Texas, USA) following the manufacturer’s protocol."	"Total RNA (2 µg) was amplified and biotin-labelled by a round of in vitro transcription (IVT) with a Message Amp aRNA kit (Ambion, Austin, Texas, USA) following the manufacturer’s protocol."
!Sample_taxid_ch1	"9606"	"9606"	"9606"	"9606"	"9606"	"9606"	"9606"	"9606"	"9606"	"9606"	"9606"	"9606"	"9606"
!Sample_hyb_protocol	"Ten micrograms of biotin-labeled aRNA was fragmented using 5 μl of fragmentation buffer in a final volume of 20 µl then was mixed with 240 µl of Amersham hybridization solution (GE  Healthcare Europe GmbH, Freiburg, Germany) and injected onto CodeLink Uniset Human Whole Genome bioarrays (GE Healthcare Europe GmbH, Freiburg, Germany). Arrays were hybridized overnight at 37°C at 300 rpm in an incubator. The slides were washed in stringent TNT buffer at 46°C for 1 hour, then a streptavidin-cy5 (GE Healthcare) detection step was performed. Each slide was incubated for 30 min in 3.4 ml of streptavidin-cy5 solution as described previously (Fevre-Montange et al 2006), then was washed 4 times in 240 ml of TNT buffer, rinsed twice in 240 ml of water containing 0.2%Triton X-100, and dried by centrifugation at 600 rpm. "	"Ten micrograms of biotin-labeled aRNA was fragmented using 5 μl of fragmentation buffer in a final volume of 20 µl then was mixed with 240 µl of Amersham hybridization solution (GE  Healthcare Europe GmbH, Freiburg, Germany) and injected onto CodeLink Uniset Human Whole Genome bioarrays (GE Healthcare Europe GmbH, Freiburg, Germany). Arrays were hybridized overnight at 37°C at 300 rpm in an incubator. The slides were washed in stringent TNT buffer at 46°C for 1 hour, then a streptavidin-cy5 (GE Healthcare) detection step was performed. Each slide was incubated for 30 min in 3.4 ml of streptavidin-cy5 solution as described previously (Fevre-Montange et al 2006), then was washed 4 times in 240 ml of TNT buffer, rinsed twice in 240 ml of water containing 0.2%Triton X-100, and dried by centrifugation at 600 rpm. "	"Ten micrograms of biotin-labeled aRNA was fragmented using 5 μl of fragmentation buffer in a final volume of 20 µl then was mixed with 240 µl of Amersham hybridization solution (GE  Healthcare Europe GmbH, Freiburg, Germany) and injected onto CodeLink Uniset Human Whole Genome bioarrays (GE Healthcare Europe GmbH, Freiburg, Germany). Arrays were hybridized overnight at 37°C at 300 rpm in an incubator. The slides were washed in stringent TNT buffer at 46°C for 1 hour, then a streptavidin-cy5 (GE Healthcare) detection step was performed. Each slide was incubated for 30 min in 3.4 ml of streptavidin-cy5 solution as described previously (Fevre-Montange et al 2006), then was washed 4 times in 240 ml of TNT buffer, rinsed twice in 240 ml of water containing 0.2%Triton X-100, and dried by centrifugation at 600 rpm. "	"Ten micrograms of biotin-labeled aRNA was fragmented using 5 μl of fragmentation buffer in a final volume of 20 µl then was mixed with 240 µl of Amersham hybridization solution (GE  Healthcare Europe GmbH, Freiburg, Germany) and injected onto CodeLink Uniset Human Whole Genome bioarrays (GE Healthcare Europe GmbH, Freiburg, Germany). Arrays were hybridized overnight at 37°C at 300 rpm in an incubator. The slides were washed in stringent TNT buffer at 46°C for 1 hour, then a streptavidin-cy5 (GE Healthcare) detection step was performed. Each slide was incubated for 30 min in 3.4 ml of streptavidin-cy5 solution as described previously (Fevre-Montange et al 2006), then was washed 4 times in 240 ml of TNT buffer, rinsed twice in 240 ml of water containing 0.2%Triton X-100, and dried by centrifugation at 600 rpm. "	"Ten micrograms of biotin-labeled aRNA was fragmented using 5 μl of fragmentation buffer in a final volume of 20 µl then was mixed with 240 µl of Amersham hybridization solution (GE  Healthcare Europe GmbH, Freiburg, Germany) and injected onto CodeLink Uniset Human Whole Genome bioarrays (GE Healthcare Europe GmbH, Freiburg, Germany). Arrays were hybridized overnight at 37°C at 300 rpm in an incubator. The slides were washed in stringent TNT buffer at 46°C for 1 hour, then a streptavidin-cy5 (GE Healthcare) detection step was performed. Each slide was incubated for 30 min in 3.4 ml of streptavidin-cy5 solution as described previously (Fevre-Montange et al 2006), then was washed 4 times in 240 ml of TNT buffer, rinsed twice in 240 ml of water containing 0.2%Triton X-100, and dried by centrifugation at 600 rpm. "	"Ten micrograms of biotin-labeled aRNA was fragmented using 5 μl of fragmentation buffer in a final volume of 20 µl then was mixed with 240 µl of Amersham hybridization solution (GE  Healthcare Europe GmbH, Freiburg, Germany) and injected onto CodeLink Uniset Human Whole Genome bioarrays (GE Healthcare Europe GmbH, Freiburg, Germany). Arrays were hybridized overnight at 37°C at 300 rpm in an incubator. The slides were washed in stringent TNT buffer at 46°C for 1 hour, then a streptavidin-cy5 (GE Healthcare) detection step was performed. Each slide was incubated for 30 min in 3.4 ml of streptavidin-cy5 solution as described previously (Fevre-Montange et al 2006), then was washed 4 times in 240 ml of TNT buffer, rinsed twice in 240 ml of water containing 0.2%Triton X-100, and dried by centrifugation at 600 rpm. "	"Ten micrograms of biotin-labeled aRNA was fragmented using 5 μl of fragmentation buffer in a final volume of 20 µl then was mixed with 240 µl of Amersham hybridization solution (GE  Healthcare Europe GmbH, Freiburg, Germany) and injected onto CodeLink Uniset Human Whole Genome bioarrays (GE Healthcare Europe GmbH, Freiburg, Germany). Arrays were hybridized overnight at 37°C at 300 rpm in an incubator. The slides were washed in stringent TNT buffer at 46°C for 1 hour, then a streptavidin-cy5 (GE Healthcare) detection step was performed. Each slide was incubated for 30 min in 3.4 ml of streptavidin-cy5 solution as described previously (Fevre-Montange et al 2006), then was washed 4 times in 240 ml of TNT buffer, rinsed twice in 240 ml of water containing 0.2%Triton X-100, and dried by centrifugation at 600 rpm. "	"Ten micrograms of biotin-labeled aRNA was fragmented using 5 μl of fragmentation buffer in a final volume of 20 µl then was mixed with 240 µl of Amersham hybridization solution (GE  Healthcare Europe GmbH, Freiburg, Germany) and injected onto CodeLink Uniset Human Whole Genome bioarrays (GE Healthcare Europe GmbH, Freiburg, Germany). Arrays were hybridized overnight at 37°C at 300 rpm in an incubator. The slides were washed in stringent TNT buffer at 46°C for 1 hour, then a streptavidin-cy5 (GE Healthcare) detection step was performed. Each slide was incubated for 30 min in 3.4 ml of streptavidin-cy5 solution as described previously (Fevre-Montange et al 2006), then was washed 4 times in 240 ml of TNT buffer, rinsed twice in 240 ml of water containing 0.2%Triton X-100, and dried by centrifugation at 600 rpm. "	"Ten micrograms of biotin-labeled aRNA was fragmented using 5 μl of fragmentation buffer in a final volume of 20 µl then was mixed with 240 µl of Amersham hybridization solution (GE  Healthcare Europe GmbH, Freiburg, Germany) and injected onto CodeLink Uniset Human Whole Genome bioarrays (GE Healthcare Europe GmbH, Freiburg, Germany). Arrays were hybridized overnight at 37°C at 300 rpm in an incubator. The slides were washed in stringent TNT buffer at 46°C for 1 hour, then a streptavidin-cy5 (GE Healthcare) detection step was performed. Each slide was incubated for 30 min in 3.4 ml of streptavidin-cy5 solution as described previously (Fevre-Montange et al 2006), then was washed 4 times in 240 ml of TNT buffer, rinsed twice in 240 ml of water containing 0.2%Triton X-100, and dried by centrifugation at 600 rpm. "	"Ten micrograms of biotin-labeled aRNA was fragmented using 5 μl of fragmentation buffer in a final volume of 20 µl then was mixed with 240 µl of Amersham hybridization solution (GE  Healthcare Europe GmbH, Freiburg, Germany) and injected onto CodeLink Uniset Human Whole Genome bioarrays (GE Healthcare Europe GmbH, Freiburg, Germany). Arrays were hybridized overnight at 37°C at 300 rpm in an incubator. The slides were washed in stringent TNT buffer at 46°C for 1 hour, then a streptavidin-cy5 (GE Healthcare) detection step was performed. Each slide was incubated for 30 min in 3.4 ml of streptavidin-cy5 solution as described previously (Fevre-Montange et al 2006), then was washed 4 times in 240 ml of TNT buffer, rinsed twice in 240 ml of water containing 0.2%Triton X-100, and dried by centrifugation at 600 rpm. "	"Ten micrograms of biotin-labeled aRNA was fragmented using 5 μl of fragmentation buffer in a final volume of 20 µl then was mixed with 240 µl of Amersham hybridization solution (GE  Healthcare Europe GmbH, Freiburg, Germany) and injected onto CodeLink Uniset Human Whole Genome bioarrays (GE Healthcare Europe GmbH, Freiburg, Germany). Arrays were hybridized overnight at 37°C at 300 rpm in an incubator. The slides were washed in stringent TNT buffer at 46°C for 1 hour, then a streptavidin-cy5 (GE Healthcare) detection step was performed. Each slide was incubated for 30 min in 3.4 ml of streptavidin-cy5 solution as described previously (Fevre-Montange et al 2006), then was washed 4 times in 240 ml of TNT buffer, rinsed twice in 240 ml of water containing 0.2%Triton X-100, and dried by centrifugation at 600 rpm. "	"Ten micrograms of biotin-labeled aRNA was fragmented using 5 μl of fragmentation buffer in a final volume of 20 µl then was mixed with 240 µl of Amersham hybridization solution (GE  Healthcare Europe GmbH, Freiburg, Germany) and injected onto CodeLink Uniset Human Whole Genome bioarrays (GE Healthcare Europe GmbH, Freiburg, Germany). Arrays were hybridized overnight at 37°C at 300 rpm in an incubator. The slides were washed in stringent TNT buffer at 46°C for 1 hour, then a streptavidin-cy5 (GE Healthcare) detection step was performed. Each slide was incubated for 30 min in 3.4 ml of streptavidin-cy5 solution as described previously (Fevre-Montange et al 2006), then was washed 4 times in 240 ml of TNT buffer, rinsed twice in 240 ml of water containing 0.2%Triton X-100, and dried by centrifugation at 600 rpm. "	"Ten micrograms of biotin-labeled aRNA was fragmented using 5 μl of fragmentation buffer in a final volume of 20 µl then was mixed with 240 µl of Amersham hybridization solution (GE  Healthcare Europe GmbH, Freiburg, Germany) and injected onto CodeLink Uniset Human Whole Genome bioarrays (GE Healthcare Europe GmbH, Freiburg, Germany). Arrays were hybridized overnight at 37°C at 300 rpm in an incubator. The slides were washed in stringent TNT buffer at 46°C for 1 hour, then a streptavidin-cy5 (GE Healthcare) detection step was performed. Each slide was incubated for 30 min in 3.4 ml of streptavidin-cy5 solution as described previously (Fevre-Montange et al 2006), then was washed 4 times in 240 ml of TNT buffer, rinsed twice in 240 ml of water containing 0.2%Triton X-100, and dried by centrifugation at 600 rpm. "
!Sample_scan_protocol	"The slides were scanned using a GenePix 4000B scanner (Axon, Union City, USA) and GenePix 3.0 software, with the laser set at 635 mm, the laser power at 100%, and the photomultiplier tube voltage at 60%."	"The slides were scanned using a GenePix 4000B scanner (Axon, Union City, USA) and GenePix 3.0 software, with the laser set at 635 mm, the laser power at 100%, and the photomultiplier tube voltage at 60%."	"The slides were scanned using a GenePix 4000B scanner (Axon, Union City, USA) and GenePix 3.0 software, with the laser set at 635 mm, the laser power at 100%, and the photomultiplier tube voltage at 60%."	"The slides were scanned using a GenePix 4000B scanner (Axon, Union City, USA) and GenePix 3.0 software, with the laser set at 635 mm, the laser power at 100%, and the photomultiplier tube voltage at 60%."	"The slides were scanned using a GenePix 4000B scanner (Axon, Union City, USA) and GenePix 3.0 software, with the laser set at 635 mm, the laser power at 100%, and the photomultiplier tube voltage at 60%."	"The slides were scanned using a GenePix 4000B scanner (Axon, Union City, USA) and GenePix 3.0 software, with the laser set at 635 mm, the laser power at 100%, and the photomultiplier tube voltage at 60%."	"The slides were scanned using a GenePix 4000B scanner (Axon, Union City, USA) and GenePix 3.0 software, with the laser set at 635 mm, the laser power at 100%, and the photomultiplier tube voltage at 60%."	"The slides were scanned using a GenePix 4000B scanner (Axon, Union City, USA) and GenePix 3.0 software, with the laser set at 635 mm, the laser power at 100%, and the photomultiplier tube voltage at 60%."	"The slides were scanned using a GenePix 4000B scanner (Axon, Union City, USA) and GenePix 3.0 software, with the laser set at 635 mm, the laser power at 100%, and the photomultiplier tube voltage at 60%."	"The slides were scanned using a GenePix 4000B scanner (Axon, Union City, USA) and GenePix 3.0 software, with the laser set at 635 mm, the laser power at 100%, and the photomultiplier tube voltage at 60%."	"The slides were scanned using a GenePix 4000B scanner (Axon, Union City, USA) and GenePix 3.0 software, with the laser set at 635 mm, the laser power at 100%, and the photomultiplier tube voltage at 60%."	"The slides were scanned using a GenePix 4000B scanner (Axon, Union City, USA) and GenePix 3.0 software, with the laser set at 635 mm, the laser power at 100%, and the photomultiplier tube voltage at 60%."	"The slides were scanned using a GenePix 4000B scanner (Axon, Union City, USA) and GenePix 3.0 software, with the laser set at 635 mm, the laser power at 100%, and the photomultiplier tube voltage at 60%."
!Sample_data_processing	"The relative intensity of the raw hybridization signal on arrays varies in different experiments. CodeLink Expression Analysis v4.0 software was therefore used to normalize the raw hybridization signal on each array to the median of the array (median intensity is 1 after normalization) for better cross-array comparison. The threshold of detection was calculated using the normalized signal intensity of the 100 negative control probes in the array; spots with signal intensities below this threshold are referred to as “absent”."	"The relative intensity of the raw hybridization signal on arrays varies in different experiments. CodeLink Expression Analysis v4.0 software was therefore used to normalize the raw hybridization signal on each array to the median of the array (median intensity is 1 after normalization) for better cross-array comparison. The threshold of detection was calculated using the normalized signal intensity of the 100 negative control probes in the array; spots with signal intensities below this threshold are referred to as “absent”."	"The relative intensity of the raw hybridization signal on arrays varies in different experiments. CodeLink Expression Analysis v4.0 software was therefore used to normalize the raw hybridization signal on each array to the median of the array (median intensity is 1 after normalization) for better cross-array comparison. The threshold of detection was calculated using the normalized signal intensity of the 100 negative control probes in the array; spots with signal intensities below this threshold are referred to as “absent”."	"The relative intensity of the raw hybridization signal on arrays varies in different experiments. CodeLink Expression Analysis v4.0 software was therefore used to normalize the raw hybridization signal on each array to the median of the array (median intensity is 1 after normalization) for better cross-array comparison. The threshold of detection was calculated using the normalized signal intensity of the 100 negative control probes in the array; spots with signal intensities below this threshold are referred to as “absent”."	"The relative intensity of the raw hybridization signal on arrays varies in different experiments. CodeLink Expression Analysis v4.0 software was therefore used to normalize the raw hybridization signal on each array to the median of the array (median intensity is 1 after normalization) for better cross-array comparison. The threshold of detection was calculated using the normalized signal intensity of the 100 negative control probes in the array; spots with signal intensities below this threshold are referred to as “absent”."	"The relative intensity of the raw hybridization signal on arrays varies in different experiments. CodeLink Expression Analysis v4.0 software was therefore used to normalize the raw hybridization signal on each array to the median of the array (median intensity is 1 after normalization) for better cross-array comparison. The threshold of detection was calculated using the normalized signal intensity of the 100 negative control probes in the array; spots with signal intensities below this threshold are referred to as “absent”."	"The relative intensity of the raw hybridization signal on arrays varies in different experiments. CodeLink Expression Analysis v4.0 software was therefore used to normalize the raw hybridization signal on each array to the median of the array (median intensity is 1 after normalization) for better cross-array comparison. The threshold of detection was calculated using the normalized signal intensity of the 100 negative control probes in the array; spots with signal intensities below this threshold are referred to as “absent”."	"The relative intensity of the raw hybridization signal on arrays varies in different experiments. CodeLink Expression Analysis v4.0 software was therefore used to normalize the raw hybridization signal on each array to the median of the array (median intensity is 1 after normalization) for better cross-array comparison. The threshold of detection was calculated using the normalized signal intensity of the 100 negative control probes in the array; spots with signal intensities below this threshold are referred to as “absent”."	"The relative intensity of the raw hybridization signal on arrays varies in different experiments. CodeLink Expression Analysis v4.0 software was therefore used to normalize the raw hybridization signal on each array to the median of the array (median intensity is 1 after normalization) for better cross-array comparison. The threshold of detection was calculated using the normalized signal intensity of the 100 negative control probes in the array; spots with signal intensities below this threshold are referred to as “absent”."	"The relative intensity of the raw hybridization signal on arrays varies in different experiments. CodeLink Expression Analysis v4.0 software was therefore used to normalize the raw hybridization signal on each array to the median of the array (median intensity is 1 after normalization) for better cross-array comparison. The threshold of detection was calculated using the normalized signal intensity of the 100 negative control probes in the array; spots with signal intensities below this threshold are referred to as “absent”."	"The relative intensity of the raw hybridization signal on arrays varies in different experiments. CodeLink Expression Analysis v4.0 software was therefore used to normalize the raw hybridization signal on each array to the median of the array (median intensity is 1 after normalization) for better cross-array comparison. The threshold of detection was calculated using the normalized signal intensity of the 100 negative control probes in the array; spots with signal intensities below this threshold are referred to as “absent”."	"The relative intensity of the raw hybridization signal on arrays varies in different experiments. CodeLink Expression Analysis v4.0 software was therefore used to normalize the raw hybridization signal on each array to the median of the array (median intensity is 1 after normalization) for better cross-array comparison. The threshold of detection was calculated using the normalized signal intensity of the 100 negative control probes in the array; spots with signal intensities below this threshold are referred to as “absent”."	"The relative intensity of the raw hybridization signal on arrays varies in different experiments. CodeLink Expression Analysis v4.0 software was therefore used to normalize the raw hybridization signal on each array to the median of the array (median intensity is 1 after normalization) for better cross-array comparison. The threshold of detection was calculated using the normalized signal intensity of the 100 negative control probes in the array; spots with signal intensities below this threshold are referred to as “absent”."
!Sample_platform_id	"GPL2895"	"GPL2895"	"GPL2895"	"GPL2895"	"GPL2895"	"GPL2895"	"GPL2895"	"GPL2895"	"GPL2895"	"GPL2895"	"GPL2895"	"GPL2895"	"GPL2895"
!Sample_contact_name	"Joël,,LACHUER"	"Joël,,LACHUER"	"Joël,,LACHUER"	"Joël,,LACHUER"	"Joël,,LACHUER"	"Joël,,LACHUER"	"Joël,,LACHUER"	"Joël,,LACHUER"	"Joël,,LACHUER"	"Joël,,LACHUER"	"Joël,,LACHUER"	"Joël,,LACHUER"	"Joël,,LACHUER"
!Sample_contact_email	"lachuer@univ-lyon1.fr"	"lachuer@univ-lyon1.fr"	"lachuer@univ-lyon1.fr"	"lachuer@univ-lyon1.fr"	"lachuer@univ-lyon1.fr"	"lachuer@univ-lyon1.fr"	"lachuer@univ-lyon1.fr"	"lachuer@univ-lyon1.fr"	"lachuer@univ-lyon1.fr"	"lachuer@univ-lyon1.fr"	"lachuer@univ-lyon1.fr"	"lachuer@univ-lyon1.fr"	"lachuer@univ-lyon1.fr"
!Sample_contact_phone	"04 72 91 34 93"	"04 72 91 34 93"	"04 72 91 34 93"	"04 72 91 34 93"	"04 72 91 34 93"	"04 72 91 34 93"	"04 72 91 34 93"	"04 72 91 34 93"	"04 72 91 34 93"	"04 72 91 34 93"	"04 72 91 34 93"	"04 72 91 34 93"	"04 72 91 34 93"
!Sample_contact_department	"U842"	"U842"	"U842"	"U842"	"U842"	"U842"	"U842"	"U842"	"U842"	"U842"	"U842"	"U842"	"U842"
!Sample_contact_institute	"INSERM"	"INSERM"	"INSERM"	"INSERM"	"INSERM"	"INSERM"	"INSERM"	"INSERM"	"INSERM"	"INSERM"	"INSERM"	"INSERM"	"INSERM"
!Sample_contact_address	"16 avenue du Doyen Lépine"	"16 avenue du Doyen Lépine"	"16 avenue du Doyen Lépine"	"16 avenue du Doyen Lépine"	"16 avenue du Doyen Lépine"	"16 avenue du Doyen Lépine"	"16 avenue du Doyen Lépine"	"16 avenue du Doyen Lépine"	"16 avenue du Doyen Lépine"	"16 avenue du Doyen Lépine"	"16 avenue du Doyen Lépine"	"16 avenue du Doyen Lépine"	"16 avenue du Doyen Lépine"
!Sample_contact_city	"BRON"	"BRON"	"BRON"	"BRON"	"BRON"	"BRON"	"BRON"	"BRON"	"BRON"	"BRON"	"BRON"	"BRON"	"BRON"
!Sample_contact_zip/postal_code	"69676"	"69676"	"69676"	"69676"	"69676"	"69676"	"69676"	"69676"	"69676"	"69676"	"69676"	"69676"	"69676"
!Sample_contact_country	"France"	"France"	"France"	"France"	"France"	"France"	"France"	"France"	"France"	"France"	"France"	"France"	"France"
!Sample_supplementary_file	"NONE"	"NONE"	"NONE"	"NONE"	"NONE"	"NONE"	"NONE"	"NONE"	"NONE"	"NONE"	"NONE"	"NONE"	"NONE"
!Sample_data_row_count	"54359"	"54359"	"54359"	"54359"	"54359"	"54359"	"54359"	"54359"	"54359"	"54359"	"54359"	"54359"	"54359"
!series_matrix_table_begin
"ID_REF"	"GSM563806"	"GSM563807"	"GSM563808"	"GSM563809"	"GSM563810"	"GSM563811"	"GSM563812"	"GSM563825"	"GSM563826"	"GSM563829"	"GSM563834"	"GSM563837"	"GSM563844"
1001	71.2151	73.0544	57.6532	87.6616	104.9775	57.1424	80.8029	72.1403	70.8541	54.13	95.572	89.6609	72.4527
1002	2.1647	2.6127	2.2946	3.3357	3.6407	4.0483	4.239	4.1035	4.7021	3.8893	5.8557	4.9594	5.0163
1003													
1004													
1005													
1006													
1007													
1008	78.017	67.6899	60.9173	87.9725	107.9673	52.8528	73.9808	66.9401	71.9426	50.8354	95.3759	79.5764	84.6822
1009	1.7615	1.5229	2.6993	2.0755				1.2668				1.818	
1010	1.1679	1.12	1.2448	1.5154	2.2507	2.1056	2.9417	2.1408	2.7804	2.334	2.9516	3.1673	2.4514
1011													
1012			3.1255			1.2059							
1013													
1014													
1015	87.0365	69.6584	66.5332	85.0886	109.8939	61.3919	79.0385	68.6933	74.6964	55.4649	97.2202	79.0347	70.466
1016													
1017													
1018													
1019													
1020													
1021		1.5894	2.3836	2.9133	3.7691	3.5548	5.0232	5.0778	4.8418		5.0521	4.2845	5.7438
1022	86.7561	63.7058	61.7344	84.3502	104.4359	60.3779	78.2194	74.6143	72.8399	56.5453	102.3042	77.338	66.2905
1023	1.2721	1.4058	1.5881	2.6868	2.0537	1.2266		1.6165				1.5211	
1024													
1025													
1026													
1027	9.5617	6.4626	18.8636	19.912	33.746	16.4577	55.3074	21.453	54.1629	37.4615	59.1933	36.9728	27.0956
1028													
1029	86.2662	80.698	58.8558	97.8814	121.119	61.8312	78.6926	71.5133	76.929	52.4945	100.7031	79.8532	73.1262
1032	16.5466	11.4921	14.8268	17.7993	30.165	25.2026	51.1119	44.5275	57.3513	27.3505	73.2417	66.2729	45.2228
1033					1.1382								
1034													
1035													
1036	86.0975	75.3688	59.6869	90.7793	120.0322	66.5671	84.6221	80.2232	77.8364	57.3123	103.1908	81.6518	68.37
1037													
1038													
1039													
1040				0.9293				1.3063					
1041													
1042	3.7254		1.0024	1.4739	2.3737		1.3722			2.7899	2.4292	3.6521	2.4524
1043	81.714	78.1337	59.5639	92.763	112.6725	60.3946	77.78	70.4812	70.1933	55.0341	99.7908	73.5464	75.6547
1044													
1046													
1047						1.012							
1048		1.1115				5.3272			2.7216		2.8906	2.2686	
1049													
1050	63.617	81.514	63.566	96.2556	104.4432	69.0311	86.3414	80.8272	77.5045	56.3004	109.0481	86.3907	63.6073
1051	0.9535	0.8236		1.677		1.5898		2.8026	2.3887		4.1759	4.1756	
1052	38.1817	47.9954	37.4573	33.8793	36.0674	15.6147	14.65	22.9446	16.3885	17.4823	21.1445	24.3662	17.8858
1053													
1054													
1055													
1056													
1057	100.171	82.8603	68.2106	102.5094	110.2658	60.288	81.1386	73.5738	76.6786	57.5008	98.4267	77.0274	63.4184
1058	1.4938	2.4173											
1059	2.2845	1.7387	1.5505	4.0014	1.7818						1.479	1.411	
1060	2.6547	2.3379	2.1405	3.1848		3.2956	3.7204	3.0359	4.703	3.5253	4.6952	4.1255	3.406
1061													
1062													
1063		1.0524			1.2952	1.7313	1.5574						5.3481
1064	96.9389	78.5668	74.8511	102.9959	104.4286	62.5781	81.5769	76.5888	75.8514	56.6185	102.2498	79.8174	70.3795
1065	1.6992	1.4025	2.4447	1.9191	1.7185	2.6537	3.0847	2.8063	3.0803	2.414	3.0867	3.0337	
1066	1.2711		0.6956	0.8291									
1067													
1068													
1069	1.4092	0.8424	0.8799	0.9565	1.331	1.6732	1.4648	1.3185	1.4845		1.6602		
1070													
1071	95.7106	74.5326	79.165	101.8745	107.7842	66.726	86.652	73.4725	85.4605	63.7019	114.3584	88.2466	76.4752
1072	0.8371		1.394	1.5715	1.688	3.9434	2.5031		1.9735	2.1558	2.9364	2.0467	2.043
1073													
1074	3.5658	2.556	2.6318	2.7276	3.0567			2.1316		2.1106			
1075		1.1559											
1076													
1077													
1078	93.3706	83.0709	82.3271	103.5494	107.6697	67.8506	93.16	78.6701	79.9224	60.6685	107.8316	89.1712	77.1767
1079													
1080													
1081													
1082	2.2979	1.7943	2.4538	2.2147	2.992	2.9903	2.7938	3.0236	3.154	3.221	2.7269	3.6245	2.1508
1083													
1084													5.116
1085	96.0242	71.2793	82.1407	96.152	107.4337	64.2851	86.6478	77.2277	70.108	59.0285	104.2308	82.1336	75.2959
1086	4.2528	4.8533	9.5028	9.7083	13.4182	16.7434	41.6927	25.0079	14.1117	9.4272	16.5368	29.2116	6.0287
1088													
1089			0.6689										
1090	1.847	1.57	1.6388	2.0686	1.7187	1.8409	1.9632	2.56	1.7626		2.0007	2.3522	
1091													
1092	92.3825	80.0849	81.053	102.2752	101.1241	57.9902	82.2272	79.0163	68.7338	53.2483	96.7596	81.6052	73.7873
1093									1.1143				
1094													
1095	2.4587	1.074	7.8065	4.3969	2.345							2.5469	
1096	1.4601	2.223	1.0864	1.6226	2.8655	3.1969	5.3427	6.4172	3.3974	7.8123	6.2513	2.5887	4.3705
1097	0.9619	5.4203		1.6288		2.7288	4.269		2.0232			3.3488	
1098													
1099	68.9316	64.1054	75.9847	99.764	109.2065	55.4264	77.9142	72.1867	70.3489	53.6806	90.6199	73.505	76.7102
1100	1.5467			1.2227			1.6452	1.2257					
1101													
1102													
1103	1.6294				1.3691	1.0924		2.433				1.8212	
1104													
1105			0.7876										
1106	78.9066	77.5763	81.2672	96.38	116.7717	64.4715	83.2439	69.2598	68.9786	54.4091	98.8027	78.2623	69.6549
1107													
1108	5.2486	4.0799	4.6239	5.465	6.3455	3.9734	3.7139	3.8608	3.0963		3.345	4.3812	3.2136
1109													
1110	1.004		2.7361	2.3597	3.3872		4.3517	1.5148			3.4493	2.0963	1.6813
1111	1.6515	1.3457	1.7255	2.1441	2.6278	1.6544	2.3072	1.802	2.8887		2.5	3.1201	2.5725
1112													
2001				0.7913	10.0541				1.6248	1.2567			
2003													
2004			0.9129	1.3022		1.1649	1.6137	1.5341	1.5086	1.6628		2.3083	
2005													
2006	4.2359	3.473	12.487	9.4162	6.4763	16.0873	22.354	13.6592	22.7656	30.51	27.1285	28.0384	46.3815
2007													
2008													
2009													
2010													
2011													
2012	2.2073	2.1534	1.2091	1.4089		1.3628	1.459	1.3587	1.8991	2.2295	1.8976		4.1325
2013													
2014													
2015													
2016									1.4403			1.3659	
2017	1.4088			0.8386					1.5442				
2018										1.5783			
2019	87.358	82.092	65.8288	98.0674	73.2257	167.1217	261.7121	191.1282	211.0797	152.5865	227.7862	229.1535	610.2275
2020	89.9053	93.0253	93.6256	171.2879	172.4639	133.1705	277.6325	198.2531	234.3704	237.8129	331.3428	246.2048	379.5866
2021													
2022													
2023													
2024													
2025	0.8469												
2026													
2027		0.898	0.9439	1.3134	1.6975		1.2026						
2028													
2030													
2031													
2032													
2033	7.8228	5.6651	12.1114	15.2169	5.1814	40.0862	32.3517	19.2746	80.227	7.7529	10.2378	26.7679	48.8019
2034	76.3892	60.3802	46.9687	154.0235	93.4147	82.5844	180.0996	101.7685	95.749	106.0914	130.6892	117.1154	192.4961
2035													
2036	0.8908	1.038	0.6169	0.9436									
2037													
2038													
2039													
2040	1.433	1.8978	2.6962	2.2502	2.6905	5.922	3.186	5.8434	2.5906		3.6471	3.0325	
2041	9.5087	8.2976	8.1128	13.2309	12.9467	12.4433	15.4671	11.0787	27.4782	7.7718	22.5951	16.2475	37.1085
2042													
2043													
2044	16.6783	10.0862	7.4813	12.4642	10.6903	3.8796	4.8001	6.6587	5.1162	7.8712	12.9813	11.4634	3.6506
2045		0.8399											
2046													
2047	158.1872	157.3555	114.5902	226.1839	297.4522	220.0998	470.2146	453.0916	318.5482	349.3663	440.5911	474.5828	540.3066
2048	18.46	15.0141	26.2011	34.7778	25.2578	95.5	39.9674	206.5743	27.4738	12.6527	28.7393	39.9357	110.6843
2051			0.6166										
2052									1.1515				
2053					1.2848			1.4285	1.7928				
2054	2.983	3.8613	1.0365	2.8834	2.5575	3.574	3.8806	5.9553	5.1147	4.0046	3.1235	5.1289	6.8644
2055		1.2592		0.7318				1.6803	1.4704				
2056	1.4757		1.0233	1.4746	1.3924	1.2458		1.2803	1.6831		1.814	2.0622	
2057													
2058													
2059	4.3978	4.2966	1.9389	4.4982	3.0408		1.6491	2.2999	2.1597	2.545	2.3902	3.4835	
2060	2.0668	1.4093	0.778		1.1228	1.2155		1.3682					
2061	121.0938	141.2429	49.1384	151.1355	132.4936	115.3389	302.7018	225.101	273.8032	251.8498	305.5968	250.2033	323.9274
2062	8.0679	8.1349	11.6743	14.2749	8.8402	14.1872	18.8389	17.0804	23.415	8.226	19.4896	20.9895	25.0431
2063	1.0788	0.7407		0.9273		0.9964	1.6231	1.1289	1.2933				
2064													
2065													
2066	74.0624	57.2881	65.7994	66.5345	72.0022	23.8915	23.1024	36.9697	28.809	35.7919	40.6719	56.0336	28.0432
2067													
2068						1.3893			2.2728				2.0027
2069	1.8967	2.0299	1.8482	1.7694	1.5227	1.5628	1.291	1.0936	1.9982		1.4922		2.949
2070	15.9052	13.212	14.0227	10.8877	14.204	4.6554	4.7404	7.8233	5.2195	6.6928	5.962	9.4741	4.9623
2071													
2072	60.683	48.4069	56.6838	53.9263	61.7615	17.2353	18.026	30.3764	20.5155	28.9969	29.6893	36.6987	31.5943
2073	3.5983	4.0958	3.1264	5.8458	4.5245	0.9958	1.734	2.1308	3.0202	2.3008	3.5402		
2074													
2075						1.1174							
2076	4.7778	3.7525	5.1621	6.8776	5.1355	6.4875	5.5515	4.3443	8.6442	8.837	7.3427	8.2933	11.3411
2077	1.5999	1.7439	2.2527	2.6717	2.3684	3.1325	4.2999	3.6488	3.5864	3.0234		3.2618	3.3642
2078													
2079													
2080													
2081	1.8957	1.578	2.5235	2.992	4.0544						2.3547	2.5146	
2082													
2083	1.4816	2.0003	1.0337	1.3663	1.3949	2.1068	3.1095	5.2232	1.8011		2.1559	3.9185	
2084													
2085													
2086													
2088													
2089	1.422	0.7894	0.8101	1.4021	1.0595	1.1738	1.9323	1.2971	1.3165			1.6092	
2090								1.1744					
2091	0.8028												
2092	2.9334	3.0677	11.7473	6.5442	4.619				1.4283			2.2074	
2093	1.1106												
2094	1.4774	0.9158	1.561	1.335	1.5449	2.7078		1.5382	2.8343		2.4013	2.1491	3.2093
2095													
2096													
2097													
2098					1.3016		1.3523						
2100													
2102	1.4221												
2103	10.5067	12.2508	10.4505	19.2774	17.3548	25.749	29.7096	29.7072	57.9731	44.4124	37.7438	40.1333	80.4786
2104				0.8171					1.8398				
2105	1.4843	1.2752	1.4865	2.3178	1.7816	4.7084	31.1661	1.868	2.1043			1.846	
2106	34.62	84.0408	47.595	99.7638	103.6306	150.0418	262.7824	224.0943	175.8941	102.222	309.4668	283.695	124.9348
2107			0.9875	1.4685									
2108	1.0994		0.7018	0.8242	1.7278	1.3126	2.2732	1.4381	3.1916		3.2673	2.6201	3.2055
2109													
2110	1.0151	1.1474	1.3572	1.1817		1.571	1.8326	2.383	3.2635				3.3276
2111	2.4085	2.3602	1.8276	3.4834	2.5349	1.3174	1.4733	1.8824	2.4348		2.9763	1.6735	3.3673
2112	1.6867	3.8099	2.5235	4.6707	2.532	1.4549	2.0845	1.3225	1.6213		2.3251	2.1734	1.8286
3002													
3003									1.4084				
3004													
3005	17.7927	13.6786	14.0477	23.5969	28.202	58.7026	65.8352	73.1206	79.7489	60.2116	89.3953	106.5893	196.6791
3006									1.2759				
3007													
3008		0.8296		0.9511									
3009													
3010													
3011													
3012	39.5861	26.5546	30.1608	51.7451	68.7291			1.8261	2.0651	1.7662	2.3828	2.7285	5.8576
3013													
3014							1.4897						
3015	3.0571	3.0244	2.7425	3.7212	4.6329	4.5138	5.4629	4.6462	5.4432	4.9292	6.0274	5.0239	4.8778
3016													
3017	0.8277		0.9541	1.2071	1.6195	1.4445		1.7741	1.3221			2.5946	
3018													
3019	20.6753	14.0637	14.9782	25.9188	28.7011	16.1266	21.0964	22.3538	24.0828	19.6266	22.9941	27.8331	60.4829
3020						1.0498		1.215					
3021		0.7936									1.609		
3022	11.0968	8.2496	10.1778	10.9036	13.6652	5.0677	4.4163	8.4391	5.3883	5.694	8.4851	10.4198	3.1725
3023	13.5036	13.8	12.8189	12.1537	14.1358	5.4079	5.2088	9.7982	6.9751	8.8726	8.3655	10.6098	
3024													
3025													
3026	6.9834	5.1225	4.6425	8.5561	11.7095	228.1332	296.2496	282.6609	294.7629	229.245	340.2738	366.4712	814.7666
3027	2.1538	2.483	2.5596	4.3428	4.4561	4.9616	6.0664	5.3396	6.2211	4.5134	5.397	6.2575	3.5181
3028													
3029													
3030													
3031				0.8875									
3032													
3033	49.4961	36.1684	33.8496	63.4244	79.5913	5.5223	7.0728	7.0227	6.1469	5.4358	6.8342	7.0033	13.1167
3034													
3035													
3036	2.5957	1.2144	0.8809	1.791	2.0019	1.2339	1.9215		1.8082	2.1483	2.3475	1.6833	
3037	1.0595		0.8844	1.2517	1.5084	1.9857	1.6577	1.8234	1.2915		2.1484	1.7622	
3038	0.9211							1.6907	1.1527		1.8903	2.5203	
3039													
3041	1.8898	1.0924	1.9995	1.0959	2.1071			1.4706	1.6963		1.7221	1.6247	
3042		0.6426		0.9362									
3043	1.1319	2.2568	1.0645			1.7901	1.8388	2.0226	1.5458				1.6101
3044	1.2503		1.5315	1.6068		2.1301	5.5621	2.6098	5.2332	3.5137	5.2623	3.1257	
3045													
3046													
3047	64.8246	47.1143	42.2939	78.9007	99.2077	2.0002	3.1089	2.9024	3.0983	2.5074	2.6215	3.0764	8.3989
3048	1.1009		1.4256		1.1596			0.9527					
3049									1.4538				
3050													
3051													
3052													
3053													
3054	5.8798	5.2802	5.2949	8.7206	10.8327	158.9323	161.7005	213.7108	185.3252	150.9053	186.381	214.0048	391.5305
3055	1.0907	1.8219	1.6833	1.996	3.6154	1.7811		2.2935	5.3115	3.4032		3.5102	
3056	1.308	1.167	1.5402	1.7727	2.6353	1.4288	1.6354	2.1188		1.9944	2.3056	1.9392	1.8207
3057													
3058	2.5547	1.616	3.0179	4.3418	2.5919	5.4872	3.9572	4.0487	9.2496	2.2732	2.0113	6.0291	6.1994
3059													
3060													
3061	8.8585	5.6377	6.2307	9.4044	11.3196	193.9731	260.939	230.2405	263.8287	204.691	288.5314	308.6733	664.6748
3062	0.844												
3063											1.4615		
3064													
3065													
3066													
3067													
3068	27.6117	18.2603	20.548	32.3462	35.1795	83.1584	116.9189	115.5041	95.0929	77.2979	105.1294	116.8905	282.0932
3069													
3070													
3071	18.4643	13.8629	16.6405	14.9305	14.1236	7.3423	6.9965	11.3041	8.0482	8.0285	9.2188	12.4483	5.7121
3072													
3073													
3074													
3076		0.8494	1.1035										
3077				0.6932									
3078													
3079													
3080													
3081													
3082	43.5641	28.2052	34.6267	49.1939	65.4286	27.7595	37.7647	35.2831	34.2435	28.8012	31.3497	40.6242	113.6974
3083													
3084	0.9981		1.6558	1.0971		1.4457						2.1001	
3085	1.0836	0.7687		0.8066				1.535	1.8569	2.087			1.857
3086													
3087													
3088	0.9284												
3089	6.0369	5.4857	6.8008	8.9295	10.8351	147.3794	185.5725	202.0224	188.5764	149.9168	196.2359	215.9213	431.9437
3090													
3091	2.6433	4.079	6.3802	5.7859	7.5152	6.0329	14.6832	8.2976	10.1856	7.8153	11.0134	7.9867	6.7515
3092													
3093													
3094	1.274	4.3588											
3095													
3096	95.1116	73.1748	83.9298	123.6627	152.4413	9.8569	13.2262	15.5021	11.0906	8.6851	9.9839	14.3179	25.4603
3097													
3098			0.684										
3099	1.9392	4.287	2.2406	3.4493	6.1395			1.584	1.6749				4.2054
3100													
3101													
3102													
3103	16.4645	15.7871	19.8314	27.0533	31.4199	47.8884	65.6919	59.9169	64.7349	56.5004	63.8153	75.0663	197.919
3104	1.4828	1.9335	1.6773	1.8268	1.0587	1.1907	1.5709	2.4221	1.6789		2.9178	1.5831	2.0876
3105													
3106													
3107								1.5495					
3108													
3109													
3110	38.0883	21.6468	33.5586	43.4294	56.2883	1.6864	2.52	2.5248	2.344		2.2232	2.3999	6.0507
3111	1.5613	2.8523	1.75	2.8173	2.0034	1.1375	1.4766		2.128		2.4086		
3112													
4001													
4002													
4003													1.8982
4004	7.1924	7.3372	10.528	12.4949	16.8293	8.4209	16.0727	12.1234	13.8336	11.5139	14.7261	15.9991	11.041
4005	1.3745	1.4848	1.3258	1.792	1.3397	2.0059	2.9653	2.5253	2.5857	1.9459	3.9923	4.0047	3.378
4006													
4007	5.7499	2.7238	2.8185	5.054	4.544	4.4336	4.9465	8.2712	6.1544	3.8161	5.1657	5.2463	3.5592
4008													
4009													
4010													
4011													
4012									1.0632				
4013				1.2238	1.5597	2.2671			1.7736		2.2839	1.9726	
4014	2.0716	5.5863	0.9821	1.9299	2.8157	7.3897	1.4324	4.1339	2.1473		4.507	3.2078	10.9855
4015													
4016	0.7859		0.8621	1.012		1.35	1.5669				1.5769		
4017													
4018			0.7027	1.526		4.2999	2.6579	1.8248	1.7611	2.5158	1.9566	2.2932	2.7342
4019			0.7392	0.989									
4020									1.3687				
4021	4.5604	3.5421	4.316	4.8332	4.6438	2.6554	4.2597	3.6399	4.6765	4.6633	4.1753	3.3078	5.296
4022													
4023													
4024													
4025		1.8631		0.8542						1.7826		1.6207	
4026	2.9976	2.3185	2.9432	3.5868	4.1638	5.2819	6.5522	6.9698	5.6871	6.026	9.1225	9.0547	4.5208
4027	1.4211	1.1842	2.545	2.9481	5.5418	2.6101	9.144	3.0671	9.8372	5.759	9.4474	5.1942	3.2539
4028			0.8279	1.1508		3.2203		1.0763	1.1748	3.3103			3.6569
4029													
4030													
4031	3.5256			1.4534	1.7872	1.5259						2.6576	
4032				0.7971					1.1351				
4033	2.5412	2.3124	2.2549	3.5055	3.2841	3.3267	5.3308	6.408	5.2451	4.4239	6.3627	3.9726	6.7439
4034						1.6148							
4035	4.9765	4.4007	2.8623	4.8488	7.7842	1.0956		2.8179	1.8543	1.3787	3.0772	1.7522	
4036													
4037	1.2195	0.8557	0.9653	1.2184	1.8275	1.7893	2.0866	2.3928	2.5396		2.6501	1.6715	
4038													
4039	1.6299	1.676	1.3259	1.9805	1.0918	3.7361	2.8012	1.9114	2.9286	1.6663	1.8802	1.5631	
4040	1.9071	11.4808	1.5812	5.7849	5.8208	6.6291	5.1432	6.0696	6.2868	9.2296	4.814	10.0971	9.116
4041													
4042	0.9001	0.8609				3.1703	1.4837	3.8252	1.6582	2.2476	3.1182	2.2556	1.9995
4043													
4044													
4045													
4046	2.8548	2.5538	3.916	3.748	4.693	6.7938	9.4018	5.134	8.8652	7.0669	8.8375	6.8828	4.1479
4047	3.0317	2.7925	1.0655	1.1439	3.6082	6.4742	6.624	8.768	9.2811	5.7536	6.3304	8.9147	5.8624
4048	0.9918			0.9241		1.4756	3.9554		1.5266				
4049	1.1599	1.6333	1.3954	1.7373	2.1881	1.3274	1.6982	1.2848	2.0602			1.6384	2.8622
4050													
4051		3.6236	0.7166	3.2138	1.2904			1.8781					
4052													
4053						1.4951							
4054		0.8843					1.8397	2.0381	2.912				
4055							1.3388		1.9577				
4056	5.409	6.217	4.8567	8.1086	7.5834	10.0009	7.0037	10.4661	9.3697	10.0356	10.3433	7.2285	16.6731
4057													
4058													
4059	1.5008	1.0328	1.3553	1.0831	1.8281	1.6224	2.8222	2.92	1.5063	1.8502	2.2819	1.7899	1.8966
4060													
4061	1.1161		0.8698	1.1283	1.0896	1.3792			1.5351			1.5097	
4062	12.6365	7.3303	10.3005	8.2019	10.5966	28.8696	14.7688	20.9553	25.2569	28.6842	37.3979	21.256	72.6603
4063	2.2979	1.7533	2.4827	3.1974	2.3661	2.7151	2.8815	3.1249	3.5036	3.4521	3.2014	2.7963	5.7
4064													
4065	7.3877	5.631	6.9141	8.04	7.375	9.2856	11.6086	10.9249	9.143	8.9498	11.7893	9.2357	5.017
4066	1.013		0.8442		1.2967	4.8224	1.3889						
4067													
4068	2.5196	2.7156	3.8285	2.5919	3.3311	3.1286	4.26	3.9564	4.4035	2.8739	4.3374	3.9626	2.7284
4069		0.887						1.289					
4070	2.9384	1.7428	1.0882	3.3063	3.6494	1.4863		1.663	1.5928		1.8177	1.9248	
4071													
4072										1.7528	1.5359	1.3639	
4073													
4074													
4075		3.0413		2.6286		1.4173	1.9177	1.893	1.9447		1.9271		2.9573
4076													
4077	2.2375	2.0018	3.3144	2.7687	2.1877	1.954	2.2716	3.6237	2.429		2.4641	2.3635	7.5407
4078													
4079		0.6462											
4080													
4081													
4082	0.899		1.4019	1.1098	1.3225	1.1993	1.8081	1.5979	1.3507		1.8501		
4083	6.1294	3.7923	2.2604	6.3337	8.6351	3.7999	6.1417	7.6292	4.6647	6.0804	8.9216	10.37	3.3993
4084	3.9527	5.3713	3.953	4.8191	2.4395	8.9573	3.8772	5.8274	5.0184	3.6642	3.5526	4.4565	5.5983
4085						1.3404							
4086													
4087													
4088													
4089	2.0105	2.2593	1.07	1.6566	1.9449	2.261	2.0454	2.7892	2.2956	3.6547	3.3476	2.6259	3.1435
4090			0.9252			1.256							2.3299
4091	1.0173	0.9796	1.0057	1.2885				1.5574	1.2016		1.7878		
4092	1.0179		0.9987	1.0314				1.6267	1.1261			1.6729	
4093			0.7408										
4094		3.139											
4095			1.2405										
4096	2.0431	1.2409	4.3362	2.5385	2.292	2.4099	1.5086	1.894	2.3804		2.3945	3.9116	3.2339
4097	1.7366	3.0135	3.5101	6.1253	5.6034	1.6633	2.2917	3.1067	2.3644		3.2396	2.6977	
4098	2.3675	2.2223	0.9978	2.7873	2.9124	1.6277	2.29	2.1791	3.969		1.9103	2.1417	5.1655
4099				1.0101									
4100													
4101													
4102	1.1027				1.4723						1.6126		
4103				0.9253		1.1525		1.7044					
4104			0.8793	1.2225		2.584	1.8977	1.6793	1.8802		1.709		1.783
4105	1.834	2.9943	1.605	1.7243	1.5499	3.0758	1.9408		2.2222		2.0536	1.8653	4.2185
4106													
4107													
4108	1.472	1.1106	0.8251										
4109	1.018		1.2511	1.22	1.391			1.1499					
4110	3.2211	2.9882	3.852	4.2467	5.5344	7.5688	6.1188	10.3953	6.4205	7.213	5.7276		14.4195
4111													
4112	1.7932	1.5367	1.9101	2.0547	2.1176			1.1959					
5001	0.7716		1.8296	1.5886	1.9592		2.4966	2.0541	5.8287	1.6927		3.2157	
5002										1.6355	1.893	1.5726	
5003													
5004													
5005	4.0914	3.0703	2.3706	5.8761	6.2876	6.7343	10.1213	9.8889	5.29	6.2845	9.6496	13.7759	3.3443
5006	2.4431	2.2949	2.0134	3.643	5.1285	7.9588	9.5865	7.9358	14.9949	11.8188	16.4448	16.1553	9.9578
5007	1.1265	1.4425	1.2484	2.1502	1.5571	1.1891		1.5413			2.0565	1.6629	
5008	2.9678	2.0736	4.0734	4.3903	2.6215	6.0476	7.7081	2.3107	8.9383	6.6036	5.0237	6.6431	7.1545
5009													
5010		0.8608	1.0461	0.7608					1.4818		1.4982		3.363
5011	1.538	1.4506	2.105	2.6319	3.1281	2.6261	1.601	2.4619	2.042	1.648	3.0973	2.6668	2.1006
5012													
5013	6.2337	6.7093	7.7159	10.0304	11.7332	13.5436	16.4217	14.9019	15.7799	11.8633	16.5466	15.2545	11.8108
5014	0.7647			0.9135									
5015	1.8263	1.7288	1.2061	1.0912	2.116	2.3489	1.7321		1.7332	2.5141	3.1315	1.5001	3.8389
5016				0.7407									
5017													
5018													
5019													
5020													
5021													
5022			0.7892							1.3801			
5023						1.1664							
5024		2.6953		2.2432				1.7825					
5025		1.9359		1.1055		2.1338						1.4913	
5026													
5027													
5028													
5029	1.8785	2.0248	2.8243	3.2821	3.2908	6.4423	4.5385	5.5471	4.4743	3.5503	4.0474	3.5035	5.2571
5030	6.3896	5.5713	6.1229	5.7358	6.7086	3.1209	3.1367	5.4391	3.4521	4.3815	4.9141	4.9133	2.1868
5031													
5032													
5033													
5035			0.958	1.0878			1.5554	1.3258	1.534	1.6436	1.618	1.5106	
5036	4.113	3.8908	3.4962	6.0537	7.9176	2.7282	4.3942	6.9876	4.8921	2.7645	6.0244	7.2536	3.0904
5037	1.3476	2.1125	1.9267	1.1955	2.4227	1.2901	1.6874	2.2191	2.5335				
5038													
5039		0.8628	0.8269	1.2675	1.7535	2.1333	3.596	2.1013	1.9323	2.4525	2.7673	2.9968	
5040	1.5845	1.2377	1.6835	2.3617	2.1668	2.0708	2.0478	2.411	1.849	2.5771	2.0665	2.416	
5041		0.9653	0.7465										
5042													
5043	5.4485	6.8439	4.5646	6.7233	8.5003	10.323	13.989	18.3383	13.8806	12.9677	9.9332	11.4518	25.3546
5044		2.447			4.5703			2.4414	1.3757		1.8338		1.7806
5045	1.874	2.4034		1.2709	2.1395	1.4201	1.7274	5.8716		3.0908	2.6745	3.2892	4.0575
5046				0.7775									
5047	0.7141			0.9157									
5049	1.2237	1.7342	1.0182	1.3845	1.4637							1.6253	
5050	6.9961	9.1994	5.0787	8.8312	7.7214			2.2312	2.6042	4.4534		4.0926	
5051								1.4553					
5052										2.9316			
5053	2.0348	2.3899		1.4281	3.5417	2.7386	1.8924	8.3465	2.3426	3.3281	3.125	3.3615	4.5378
5054													
5055								1.5493					
5056													
5057	1.3727	2.2418	1.6806	2.008	1.8714	1.6092	1.9513	1.6433	3.0646	2.5809	2.3209		4.2487
5058													
5059	3.213	1.9957	4.9998	4.338	8.0954	5.3983	17.7013	6.0668	12.6207	10.0659	13.4432	9.5106	5.8855
5060	1.749	1.253	1.3903	1.4529	1.7656	1.7935	2.3728	2.0961	2.6019		2.1745	2.1327	2.8387
5061													
5062	3.7677	3.2972	3.6099	4.8531	4.8535	5.6767	8.5999	7.4864	7.4838	6.5526	7.6498	7.546	5.0558
5063	1.3469			0.8633	1.471				1.2522		1.6146		
5064	4.3031	2.9761	3.1433	5.1262	2.9706	4.0673	2.8181	3.4722	3.7013	2.583	3.0243	1.9927	7.8623
5065	0.9195												
5066							1.2649					1.5924	
5067													
5068													
5069	10.1811	6.5511	9.5075	10.6109	10.9123	3.4004	3.4749	4.9462	7.2962	3.4088	6.8977	10.4813	2.3045
5070	2.1573	1.7976	1.3802	1.3318		2.8303	1.7078		1.8185			1.8865	3.558
5071	3.8271	3.2575	1.9221	3.5976	2.883				1.9596		1.8769	1.7433	
5072	4.9676	3.4274	3.6672	3.3801	4.258	2.3903	2.483	3.9661	2.8233	2.7123	3.4204	3.5784	
5073						1.1213							
5075	1.6391		0.8055		1.4917	1.572		1.7436			1.4876	1.4123	
5076				0.794		1.2582							
5077													
5078	6.7468	4.3334	4.6917	3.9195	4.8478	6.1292	8.2378	9.1085	10.5202	7.4642	9.9859	7.4738	9.1596
5079	2.1419	1.5229	1.4341	1.3916	2.2504	7.0216	2.6438	2.9733	3.051	4.2767	2.9438	2.5977	2.0847
5082	0.9089												
5083		1.6504	0.8159					1.1221					
5084													
5085				1.0624									
5086													
5087													
5089											1.6907		
5090			0.7587	0.8957									
5091								1.277					
5092								1.4206					
5093			1.9472	1.1513	1.212			1.124	1.531	3.0949			
5094													
5096													
5097													
5098				0.7972									
5099	1.7324	1.6024	3.2299	2.2078	2.8113		1.3599		1.4871		1.8415	1.3579	
5100	1.4683	1.2911	2.2615	1.7996	1.2065								
5101													
5102													
5103													
5104			1.3315										
5105													
5106	1.7194		1.5521	2.3294	2.8641	1.3891	1.153	2.4707	2.3207		2.0573	2.2803	
5107													
5108	1.8403	1.7931	2.0723	2.2328	2.587	2.3408	2.6603	2.0672	2.3028		2.7208	2.6039	1.9956
5109				1.098					1.2857				
5110	0.9507	1.0609	1.2645	1.1368									
5111	1.6304	2.0096	2.4204	2.8859	2.6857	2.4114	2.6738	2.7789	2.1516		2.6971	2.519	2.5611
5112													
6001	1.9557	2.0587	2.4176	2.7742	3.6518		2.6713	2.9474	2.9764	2.6985	5.6489	3.78	2.8187
6002													
6003													
6004	1.295	2.0232	1.7865	2.2249	2.7072	2.856	3.7608	2.9965	3.5922	3.1605		3.6793	2.1455
6005													
6006			0.8534	1.0758									
6007	1.4063	1.8931	1.8395	1.8386	3.5805	2.7987	2.5715	2.6996	3.0467	3.0841	3.9724	3.4083	2.5763
6008			0.8254	0.9269									
6009				0.9903					1.8992				
6010	2.7377	2.2182	2.8327	3.1988	4.3521	3.4476	7.8848	2.4166	6.6437	5.6659	6.869	4.5568	3.6607
6011		0.8103	0.9999	1.4965	1.3616	1.1757	2.3499	1.8476	1.9356		2.2879	2.0048	
6012		0.8907	1.0155	1.408	1.2519		1.4989	1.4025	1.2768			2.36	
6013	6.4741		5.7986	5.4211	5.8746	3.0158	3.1747	4.3791	4.2003	3.5363		4.9506	
6014													
6015	0.8383	1.4417	0.9602	1.2016	2.2726	1.4016	2.2162	2.1537	2.5364	1.8684	2.2885	1.861	1.9524
6016	1.4958	1.6262	1.7251	2.1149	3.1128	3.4498	4.2425	3.5437	3.9575	3.2585	4.2903	5.173	2.6879
6017													
6018												1.2319	
6019		3.9322	1.8723	4.6797	2.414	2.9902	1.9652	3.4653	3.9318	3.543	5.753	4.3843	
6020	2.0465	1.2902	2.8283	1.5333	2.3473							2.3982	
6021	2.9398	2.6709	3.1519	4.6309	4.879	6.3093	9.1707	7.1622	7.9378	5.7013	6.9519	6.6264	
6022	0.8509		1.4403	1.0877	1.1358	2.1125	1.916	1.7233	1.2312				
6023	15.5121	10.3657	9.8885	27.8658	19.8838	58.6245	53.1752	84.9716	48.9357	21.0846	31.3432	47.0687	116.9535
6024													
6025	2.4807	1.0329	1.845	1.7299	1.8505	1.4268	1.4086	1.1792	1.3447	1.406	1.6191	1.9128	
6026													
6027													
6028													
6029	1.7773	2.8187	1.2395	2.325	2.3912	2.8047		2.001	1.8214	2.3609		1.8703	2.6511
6030	1.401		1.2463	1.4594						1.4347			
6031													
6032	1.6301	1.6258	1.8353	1.8807	2.4888	2.4029	2.6267	3.7509	2.5934	2.1699	2.9902	3.7533	1.6775
6033											2.7218		
6034	3.6169	3.1891	2.555	2.2723	3.7208	1.0634	1.6889	2.4552	2.029	2.1088	2.2895	3.096	1.7548
6035													
6036		1.6708			3.1531			3.7177					
6037	1.8296	1.5623	2.0614	2.6338	1.9429	3.4601	3.5733	2.5441	3.9164	3.0493	4.2188	3.0832	4.6031
6038							1.3679	2.7079					
6039													
6040													
6041	0.7537		0.7506	1.064		1.216	1.3169	1.4485			1.5179		
6042					1.2777	1.0909	3.184	1.2931	2.6991	1.7863			
6043	3.5882	3.0175	1.7222	2.9837	3.4512	3.3284	3.0208	3.068	5.117	5.0383	5.9473	3.976	9.5642
6044	24.2167	18.5696	20.6339	24.252	27.5541	46.386	39.6007	52.4579	36.1565	41.0338	58.2858	37.6961	62.7517
6045	0.9329	1.29		1.1501	1.8741	1.3853	2.9904	1.7908	1.9667		1.7454		2.8
6046													
6047													
6048													
6049													
6050													
6051		3.4175	0.752	1.2784	2.8475	15.7637	3.9795	6.326	3.8783	3.4611	2.6094	3.0411	8.1739
6052													
6053	2.0414		2.5913	2.4324	8.5108	14.0885	8.2443	8.1018	9.0546	15.3492	24.8843	10.0299	
6054													
6055	21.0009	21.5364	19.6704	23.2812	28.4766	1.1461	1.4032	4.2073	3.2983		5.4745	5.4769	
6056	1.8258	3.4076	1.0349	2.0276	1.8163		1.5252	1.6846	1.7123			1.7071	
6057	26.9432	17.0828	4.0225	23.1052	49.3098	13.2796	63.5291	46.4377	58.7268	21.0002	34.938	44.9339	50.5023
6058	1.3474	2.4248	1.6344	2.0687	2.3488	3.2006	2.277	4.528	4.0859	3.6818	3.2508	4.2348	5.5431
6059	0.8257												2.5867
6060				0.9273									
6061	0.8962	1.4925				2.44	1.4776	2.5372			1.9063		
6062													
6063													
6064	1.3915		0.7051	1.1969			1.5733	1.7563	1.4755	2.0143		1.2594	2.9597
6065													
6066													
6067													
6068													
6069													
6070													
6071	1.5372	1.6306	1.7006	1.8266	2.4385	2.0834	2.6682	1.9601	2.2987		2.6483	2.482	
6072	4.2758	2.0204	20.7476	7.3046	2.2847	15.4834	7.174	11.8903	3.0312	3.7475	5.8376	2.8664	25.6493
6073													
6074													
6076													
6077	2.3922	3.3128	2.0925	2.8026	3.0064	9.9732	6.0997	5.1289	15.082	9.5735	12.014	9.1562	4.2508
6078	8.185	15.509	0.9587	3.3848	11.4125	14.9526	10.3035	35.6564	34.3452	17.3803	9.4135	10.3112	13.0784
6079			1.5869	2.6974	3.1002		4.3134	7.8633	1.5355	1.9348	3.6181	1.5173	3.8099
6081	1.2946	1.7603		2.3219	1.3735	1.9703	2.3269	3.7746	2.1792	2.4589			4.0458
6082	0.8697	1.0487	0.9523	0.7479									
6083													
6084		0.7843	0.7064										
6085	1.761	1.5539	1.8699	1.6968	1.9721	0.9681					1.5998		
6086	8.8757	3.3784	31.5088	15.8912	6.8969	125.2214	35.7976	31.7313	42.9118	11.5655	16.3302	26.0465	65.762
6087													
6088						1.148							
6089	1.2791												
6090		0.9908	0.7578	1.6754		1.8327		2.0555	1.7101	3.4392	1.8281	2.1151	2.6571
6091													
6092	1.7364	1.7657	2.4411	2.6908	2.9016	2.3272	5.8969	2.2048	3.3819		3.3011	3.0144	
6093	3.5027	3.2073	6.1365	3.2148	2.5065	2.7487	2.4237	1.8628	2.4722		3.1385	2.2841	9.7326
6094						2.684							
6095													
6096													
6097	13.5996	10.1358	14.843	12.4939	14.6548	3.8361	4.3297	6.4992	5.0641	5.5428	5.869	8.3865	6.8405
6098													
6099	4.8116	5.2058	4.5878	5.1717	7.3922	6.567	9.8101	12.727	8.1172	7.519	9.6012	8.8687	17.8013
6100	11.0532	11.2447	18.992	20.9056	19.8657	16.5763	22.7904	30.131	24.1166	20.6557	22.7776	23.5997	34.6678
6101	8.4281	9.3364	8.9286	7.2195	9.2338	5.2312	3.1742	6.7199	4.4137	4.3393	4.9276	5.1006	5.82
6102	1.2901	1.0993	1.2097	1.4558		2.1157	2.9883	2.102	2.772			2.5867	
6104	6.7279	7.2791	9.5834	9.8698	9.1725	3.6349	3.8726	4.4988	4.6909	4.5434	4.5993	5.2817	8.7144
6105													
6106	1.6223	2.4449	6.7154	2.2348	3.7509	3.7194	2.6177	4.4881	2.681	2.977	6.4249	3.3701	3.3609
6107	3.8136	3.6217	3.2095	5.1308	4.9699	3.3511	4.4453	6.5297	8.2762	3.3636	3.1849	4.3835	15.065
6108													
6109	2.5944	3.1816		3.4186	2.3941	7.8552	1.7223	4.8167	2.6942	3.281	2.3892	4.265	
6110		0.8568	1.3658	1.0004	1.2731				1.414		1.6091		
6111			1.2662			2.4401							4.8278
6112													
7002													
7003													
7004													
7006													
7007	1.196	1.3524	1.1041	1.1359	1.6741							1.7715	
7008	1.439	1.44	1.6896	2.4938	2.377	2.4548	2.4893	3.4134	2.9692	1.8766	2.9287	3.2144	4.3142
7009													
7010													
7012													
7013	1.3895	1.3596	1.3313	1.6631	1.7311	1.5441	2.0141	1.4659	2.6587	1.8552		1.9024	
7014													
7015													
7016													
7017													
7018	7.6318	6.5568	6.3098	10.4675	14.2242	17.6833	15.9699	28.3461	14.8343	12.5851	15.7348	20.4365	36.1881
7019													
7020													
7021													
7022		0.6595											
7023			0.8497										
7024	0.8672		0.7058										
7025	2.9378	3.7639	2.6703	4.9652	4.7177	7.4205	9.9906	8.9935	9.6923	6.2404	7.549	7.7653	
7026	12.8366	12.4459	14.1398	14.9625	15.4604	7.6219	6.7722	12.1871	8.5362	9.4046	10.3701	14.4892	4.5062
7027		1.0487						1.5023	1.3622			1.787	
7028													
7029													
7030									1.2467				
7031													
7032													
7033													
7034	0.9244	1.0877		1.0462		1.5219	1.592	2.1556	1.6807			1.5696	
7035	5.3813	4.564	2.9412	1.8062	6.1582	6.8904	10.101	11.3847	7.1871	16.8301	22.6678	7.9216	6.1926
7036													
7037	17.5068	25.7059	30.6804	40.181	40.5006	30.0898	68.4834	65.5868	42.4556	33.4287	56.2509	60.7769	23.4874
7038	0.7887			0.9664				1.8391	1.4913	1.5347			2.3258
7039													
7040	0.8319	0.977	0.7572	1.0328									
7041			0.8957	1.0044	1.2674	1.6056	2.3963	2.1816	2.1097	2.027	3.0664	1.7656	1.7365
7042						1.3751		1.4995	1.3658				
7043													
7044	3.0087	3.0852	3.9272	4.2768	4.8331	5.358	8.4476	6.2627	7.2169	5.2059	6.9446	7.0665	4.1156
7045							1.3738	1.1406	1.2619				
7046	0.8719	1.914	0.9796	1.5943	1.6372	1.1122	2.652	2.4946	2.685	2.0191	3.1083	2.6629	
7047	140.8251	131.3832	112.279	96.4684	143.1946	49.2569	45.8867	67.4716	52.3478	56.5026	65.8863	86.1002	65.3134
7048													
7049					1.8306	1.4082		2.3515				3.5675	
7050	1.3332	0.7514	0.8884	0.8768	1.5284		1.9846	1.7506	1.6803		1.4974	1.7009	
7051													
7052													
7053	1.6595	0.8305	1.2562	1.5606	1.2971				1.234				
7054	12.4566	13.5778	12.4103	10.7343	11.7869	5.1267	4.6819	7.6359	4.5965	6.171	6.8339	9.5338	2.1352
7055	0.9876	0.8501	0.8118	0.8857		1.5249	2.2307	1.5956	1.7819		1.6559		
7056	4.1669	8.2444	1.6843	4.9345	7.3737	6.6136	6.7486	5.855	5.6375	7.7341	13.6559	6.3646	8.3538
7057													
7058													
7059													
7060													
7061													
7062													
7063	2.2431	1.6651	1.8286	1.669	2.1135	1.228	1.6178	1.7327	1.5225	2.368	2.1615		
7064	2.3314		2.4077	3.6071	1.4034								
7065	1.8705	1.9494		2.309		4.98		3.0057					
7066													
7067	1.0815	0.8669				3.4004							
7068	0.9533							1.2244					
7069					1.1093								
7070													
7071													
7072													
7073													
7074	1.22	1.1562	1.1548	1.4646	2.4732	2.1643	6.0937	2.7187	5.0016	4.0194	5.8209	4.016	2.9684
7076				0.832	1.4863		3.142	1.748		3.7359	2.3768	1.6924	
7077													
7078								1.3838					
7079													
7080				0.9451		1.4398	2.5514	1.4522	1.3623			1.657	
7081				0.7018									
7082		0.8039						1.9754					
7083	2.3485	3.0439	4.9437	2.4904	3.7713	1.0871		1.4466	1.7018			1.4738	
7084			0.7966										
7085	3.4178	3.5703	1.1912	3.9725	4.4615	2.413			1.4655		2.2656	2.633	
7086	0.772												2.0639
7087	1.0667	1.0851	1.5138	2.8788	2.6637		3.9849	8.1674	2.6783	3.6706	2.5727	2.8407	2.5314
7088													
7089						1.1461							
7090	7.9584	6.2067	10.6397	10.295	9.9812	8.7215	17.306	11.4995	12.1332	9.8624	11.9344	11.9221	8.8252
7091													
7092	1.4375												
7093	4.1843	4.1977	9.5902	11.5714	13.589	7.6705	23.7042	12.4851	15.2276	11.6295	17.8084	14.687	
7094	0.933	0.9174		1.0839	0.996		1.3699	2.8969				1.654	
7096													
7097													
7098	1.6056	1.6012	1.3138	1.349		1.4633		1.2048	1.623			2.23	
7099	1.8998	1.002	2.8931			2.0225	1.7213	2.1626	1.6185				4.2771
7100	2.3817												
7101													
7102	0.8819	0.7841	0.8015	1.1436									
7103	0.7676	0.8064	0.874	1.3926									
7104	1.1927	1.3371	1.579	2.7222	1.8323	2.5282	2.5622	2.868	2.149		2.1906	2.7654	2.1145
7105													
7106						2.4488							2.2429
7107		0.8257	0.8211	0.898								1.5814	
7108													
7109	8.5502	8.1987	14.3326	13.9336	13.7939	13.3441	16.9445	12.6816	14.4221	13.202	12.8114	13.6972	20.3413
7110													
7111	4.0777	3.7023	8.1567	8.0219	8.0028	7.7782	7.6729	14.7439	7.2894	10.0933	12.6102	9.6104	11.1592
7112													
8001	7.9225	7.8945	8.1775	8.0696	9.4689	3.1708	2.2034	4.9603	3.7452	4.6301	5.1462	5.9644	4.7387
8003				1.7604					1.539				
8004		0.8097		2.4579		1.3696	1.431	1.8344	1.9642				
8005													
8006						1.0646			1.793		2.092		
8007													
8008													
8009													
8010	1.4554	1.4207	1.0489	1.4473	1.5394	1.1668	1.6868		1.8915	1.769	2.0254	2.4886	
8011			0.745	1.2698	1.1767								
8012													
8013													
8015	2.7548	3.3186	2.8413	2.6029	3.1341	1.7503		2.0876	1.2991		1.8329	1.9119	
8016	4.6947	3.6759	4.8026	5.1033	9.3063	4.5454	3.8472	5.2564		6.3896	7.3213	11.7129	
8017													
8018				1.1392	1.4564	1.3028	1.6299	1.2302	2.0384		1.7025	1.3323	
8019		0.8033		0.9489									
8020													
8021													
8022									1.0857				
8023	3.9394	1.7488	3.7427	1.2567	2.8521			1.3972		1.8436	3.5866	3.1022	
8024		0.8566		0.7502				1.15	1.7522	1.4375			
8025	3.2881	4.3119	3.0705	3.7241	3.9236	5.0155	5.153	5.2321	5.5566	4.6136	4.8596	4.1336	10.0789
8026													
8027													
8028	1.2082	2.3769	0.983	2.0335	2.1723								
8029		0.8534	0.621							1.6607			
8030													
8031						1.1054							
8032	0.8151			1.1632			1.249		1.6179		1.7051		
8033		0.937	0.6811	0.8646			1.5858					1.4483	
8034									1.2907				
8035	1.7508	2.2328	1.8028	2.0949	1.8697			1.5988		1.7874	1.4755		
8036	6.3401	4.7701	4.5528	9.6508	8.0249	11.6563	38.7664	12.5681	23.4348	15.3496	25.651	29.0461	30.3464
8037			0.6226					1.2368			1.5603		
8038	0.9667			0.8633		4.6643	2.5951	2.6722	1.4869	1.8505	1.7788	1.7819	
8039			1.0093	1.3288	1.219	2.7081	2.2827	1.2612	2.9359		2.2577	1.3375	2.544
8040													
8041													
8042													
8043	1.7637	1.6887	1.7868	2.4566	2.1008	2.6484	2.1969	3.68	2.3768	2.5215	3.5938	3.2632	
8044	0.8039												
8045		2.0481		1.7985					1.4285		2.5858		
8046	4.7992	5.3181	3.3907	4.0465	6.061	3.2931	2.2417	3.6265	3.9709	3.0134	2.9004	3.1623	6.5372
8047							1.4997	1.683	1.3715				
8048	1.1127		0.8706	1.1962		1.6354	1.5004	1.5105	1.6182			1.8607	
8049	1.7907	1.7922	1.8503	1.9805	2.0268	1.4727	1.7248	2.2776	1.6073		1.9692	1.8681	
8050				1.0482	1.1221						1.5009		
8051				0.7473	1.3242								
8052	1.9203			0.9489			15.148		20.1638		3.3261	1.7102	
8053								1.2619					
8054													
8055													
8056	1.4574	1.3058		1.6727	1.3634	2.2874	2.8391	3.409	2.328	3.2105			2.3485
8057	18.6096	19.9679	18.0179	24.0572	23.2825	11.461	13.072	18.5806	13.5777	14.6795	19.0882	22.9967	5.2878
8058													
8059							1.1927						
8060		3.3652	2.7705	3.6345	3.2109	1.999	1.8806	2.8253	2.9725	2.8199	3.4243	2.5908	5.1899
8061													
8062	0.8759	1.2068		0.7694	1.4214								
8063	0.8918	0.8599											
8064													
8065	4.2896	3.9065	5.3314	5.6912	6.5495	8.7781	12.1646	9.8127	8.1915	6.9941	11.5004	11.0652	4.1228
8066								2.2169					
8067	6.0967	4.5572	6.9952	3.1287	4.4894	1.7899	1.6313	3.1216	2.2355	4.8391	2.9355	7.2045	3.8981
8068													
8069													
8070	1.6208	1.843	3.1232	6.1407	3.5572	1.3817	1.9966	2.8474	2.2195	1.8778	3.2889	2.7372	2.0048
8071	2.9627	2.8108	3.1423	3.3578	4.1758	1.1949	1.1749	2.1876	1.4222	1.7859	1.9715	2.3145	
8072													
8073		1.184				1.6273	1.492	3.3417	1.5965	3.4235			3.4697
8074	4.8533	6.0178	4.0084	6.7567	4.3254	7.6407	9.479	9.5311	9.4112	9.1108	9.7282	9.7345	16.3689
8075													
8076													
8077													
8078	5.4849	7.2094	8.9582	7.4025	7.668	7.9407	9.7464	8.3148	8.6147		8.7346	10.3733	7.8805
8079													
8080			2.3081	1.4417		5.8982	1.4745	2.3044	1.268		1.3682	2.0054	3.2839
8081	13.0104	10.7949	10.3409	13.8974	14.8186	21.3291	22.0834	26.621	25.9847	18.0361	19.7597	18.1629	46.2418
8082	2.9531	1.2955	0.6756	1.2063			2.1427	1.8442	1.876	1.7822	2.5153	1.8333	2.9806
8083													
8084			0.8577	1.3502	1.437	2.0278	2.6076	1.9064	2.1798			1.9107	2.8276
8085													
8086													
8087	1.0652							2.8081					
8088	26.7137	19.7799	12.2065	14.2303	23.7125	37.0389	31.592	33.4756	35.1878	26.6204	38.0912	33.1636	48.8964
8089		0.7985		0.8995	1.1494		1.5662						
8090	0.91				1.836								
8091													
8092													
8093													
8094	4.3378	4.0669	0.9345	1.6578	2.0902	2.3352	5.1772	19.3225	13.9613	5.3701	4.375	4.6326	7.0592
8095	2.1684	1.5388	1.7915	1.8999	1.8223	2.7684	7.2775	3.7565	2.5324		4.9204		6.0096
8096													
8097			1.6408	1.8357		1.768							1.6904
8098			0.8369	0.7443		0.983	1.5167	1.248	1.2842				
8099	1.161	1.5397	1.654	2.1978	2.2186	1.971	2.6548	2.9094	2.5923		2.8773	2.7518	
8100	1.3736	1.4833	1.4944	2.3653	2.2377	1.2744	1.942	1.7026	1.8033			2.2207	1.8476
8101		1.6802		1.6658			1.7224	1.1443	1.4863			1.8089	
8102		1.1369											
8103	1.5111	1.6165	2.8585	2.8171	3.3671	2.8296	3.9	3.9481	3.2745	3.339	3.8522	3.8141	2.8291
8104								1.5452	1.3899				
8105	6.361	3.3094	3.5883	12.8379	3.9797	5.0542	6.9069	2.7987	16.6871	7.0944	4.447	9.3077	11.9418
8106			0.8353		1.2018	1.6147			1.1568			1.5445	
8107	8.8713	5.5348	10.3866	8.9884	8.8713	6.6187	11.0083	7.3033	8.2925		8.4955	8.5806	12.2993
8108	7.8736		18.4122	6.7049	30.391	10.0754	9.3243		19.4401	34.3927	25.5097	31.4552	19.0023
8109		1.1049				2.1721	1.7599		1.3068	2.5109			6.8649
8110													
8111						1.0132							
8112	2.1165	1.41	1.4412	1.8809	1.7259				1.0411			1.547	
9001													
9002													
9003													
9004	1.1194	1.6423	1.0774	0.81		1.1144		1.3844	2.0011	1.8577			3.4498
9005				1.767									3.2301
9006													
9007													
9008													
9009	0.9399	0.8399	0.8786	1.1758	1.3966	1.1462			2.3523	1.6363		1.9538	
9010			0.8817	0.8955								2.1203	
9011		4.4026	3.2338	6.2852	6.7646	4.8608	5.0324	10.0047	8.6331	7.5121	9.7046	10.0083	4.7724
9012											1.399		
9013													
9014													
9016		1.6633		1.2511		8.5091	1.4272		3.8364		1.8691	2.4648	11.1037
9017													
9018	1.0004	1.1492	0.9178	1.9192	1.7537		1.534	1.1517		2.5156		1.9965	3.5947
9019	11.5667	9.798	9.0257	7.3189	10.1181	20.384	15.2202	23.1096	12.7536	18.7079	20.9583	19.6097	24.4899
9020	1.249	1.0408	0.8786	1.0184							2.1328		
9021						1.16							
9022				0.8064									
9023													
9024													
9025	9.6589	14.3797	2.5487	6.2425	8.0273	5.962	13.2108	6.3205	15.2257	14.7102	21.4834	13.0106	6.3732
9026	25.9688	23.5282	12.0882	18.9502	33.0377	23.9759	41.0824	49.5287	46.1614	37.7141	55.3783	60.5923	44.1681
9027				0.8692									
9028	2.5888	3.0856	3.6758	5.1069	5.3528	4.6094	8.9081	8.5967	5.9328	4.9096	6.5216	8.6858	3.0492
9029													1.9623
9030	0.882	1.0634	1.0342	1.2568	1.1238	1.3167	2.0698	1.4807	1.3		2.3526	2.0615	
9031			0.6485			1.7502		1.1656					
9032	7.6303	4.7786	14.0448	18.5894	9.4145	12.2423	32.4524	5.7941	34.5691	9.0542	19.7489	37.8927	11.6574
9033	1.3365	1.4203	1.3739	2.7574	1.3781	3.9077	4.2489	4.131	5.1324	3.8974	4.9917	2.8532	10.3925
9034													
9035	1.1666	1.3702		0.8824				1.7021	1.2994			1.5929	2.1723
9036	3.5551	3.2553	4.7164	3.5816	5.464	6.3193	7.918	6.8495	7.2083	5.8357	7.7242	6.6109	5.0799
9037													
9038													
9039	2.9819	3.0977	3.2743	4.0522	4.4699	7.1092	9.2375	7.662	7.653	6.305	7.7356	7.874	4.247
9040													
9041									1.0641				
9042													
9043													
9044													
9045													
9046	1.5224	2.4323	1.9533	3.2062	2.0926	2.2957	3.0744	3.4408	3.3066	4.5403	2.3001	2.6825	1.8808
9047	1.0087			0.8762		1.6138						1.1142	
9048													
9049	1.7122	2.1681	2.9388	5.2087	2.937			1.186					
9051	4.9457	3.5269	6.056	7.95	9.6803	6.8948	21.7044	15.7456	15.2098	10.4028	18.2327	11.8983	6.6233
9052													
9053	0.7837	0.7513	0.8704	0.6972		1.4672		1.2268			2.4594		
9054	0.7694	1.1411		1.2018			2.1743	3.845					2.6165
9055	1.631	1.1167		1.2594	1.0912		1.9671	5.1461	1.6881			2.1962	
9056													
9058							1.2728						
9059									1.372				
9060	7.9367		1.3229	1.2998	3.1649	2.2324	2.8333	2.6299	3.937	5.0443	4.0703	2.8829	
9061	8.8555		7.4049	6.0257	8.1603	15.4562	8.6448	11.361	10.2297	7.6068	10.7702	10.2834	105.1058
9062	4.1181	4.4311	4.8532	5.5636	5.8189	8.3273	13.1297	10.3165	9.1723	8.122	10.5733	10.7039	6.3984
9063	1.4411	1.0917	1.0022	1.5035	1.376	2.1409	5.5205	1.6487	2.4782		2.9422	2.4256	
9064	3.3608	4.3175	3.2656	4.3948	3.5697	1.1913	1.2175	1.6742	1.6002	2.7695	2.6669	2.265	
9065													
9066				0.942									
9067	4.0963	10.2857	2.605	4.4949	7.3824	5.8419	7.4042	10.0306	7.2715	7.8825	5.6549	8.2184	6.5899
9068	2.4846	4.9661	1.4294	1.8232	2.4464	2.5821	2.8045	5.8627	4.1473	5.6033	2.9618	2.6145	4.1568
9069													
9070													
9071											1.408		
9072													
9073	1.4318	3.761	1.5151	6.3876	5.6236	9.7904	4.9125	10.5444	5.6192	2.7491	6.5271	9.0856	2.4409
9074	5.3278	7.8809	7.8582	11.8823	8.4696	8.0057	7.1695	8.3457	10.4871	6.2764	10.7405	13.1271	10.2282
9075	1.062	1.2055	2.3822	3.3614		2.3013	3.3791	1.7641	2.5454	1.7573		1.7932	4.8759
9076	0.9762		0.79	0.9814									
9077	24.3387	24.5482	24.0272	21.269	31.9673	11.5289	8.4663	10.3364	9.7747	10.2661	10.4541	18.3241	10.7423
9078													
9079								1.3522					
9080													
9081	2.831	3.2467	2.3431	4.1407	2.8866	1.9404	2.0426		2.6338	1.9569	2.178	2.7051	6.1327
9082	3.6	4.8151	2.8395	4.9863	4.8428	3.4235		6.3069	4.006	5.3908	3.0672	4.5219	6.8327
9083	3.9703	2.1098	3.1995	3.2047	5.3301		3.3261	1.8311	2.6803	2.2313	2.7637	3.2454	
9084													
9085	0.9032		0.6836	1.8586				2.6599			1.6476		
9086													
9087													
9088		1.0459	1.1489	1.0383			1.208	2.2419				1.403	2.3017
9089	2.3601	3.5864	4.3752	3.3476	3.6929	2.9127	2.925	3.4237		3.3244	3.8227	3.2374	8.9316
9090	1.4297	1.0903	1.3091	1.9322	1.8526	1.6726	2.3548	1.9072	2.457		1.8501	2.1829	
9091			0.8701	1.3398	1.1797	1.4123	3.04	1.5769	2.8019		3.0506	2.3942	
9092				0.7209									
9093													
9094	5.6302	2.4429	3.2112	2.1999	4.5398	2.023		2.5197	1.1946		2.0006	2.0543	
9095													
9096		1.3136	1.197	1.6108	1.1905	1.4065			1.5671				3.8072
9097			0.6757	0.8286									
9098													
9099													
9100													
9101													
9102		2.02		1.084		3.4135	1.6583	1.7223	1.8195				4.5304
9103	1.7526	3.3404	1.2069	2.1379	2.0873	2.5874	1.8889	5.6193	2.1516	3.1674		2.5839	9.1425
9104			0.9973										
9105													
9106	2.2183	1.3494	2.6933	2.4754	3.6352	1.9866	4.5588	3.8367	2.758		2.625	1.948	
9107			0.716										
9108													
9109	1.4081	1.5602	1.5758	2.2593	2.3547	2.7256	2.2672	3.0424	3.0859		2.4851	1.5104	5.0352
9110		0.7197	0.8067	1.0565	1.5352	1.4052		1.1336				1.4185	
9111													
9112													
10001	0.9649	1.1312	0.9372	0.7797	1.5105	3.1897		3.4924	1.6014	2.3476	2.6481	2.3177	
10002	3.3409	3.165	3.3042	3.2062	4.1655	1.5076	1.6197	1.9938	2.0207	2.287	2.3754	2.6081	1.8958
10003	0.8359	0.9466		0.8898								1.8224	
10004													
10005			1.4449	1.4784	2.0671	1.5839	2.51		3.1275	2.1829	2.7358	2.3404	4.0089
10006	1.0321		1.2641	1.239	1.4057				1.2264			1.9109	
10007	0.9052	1.5011	1.2535	1.7338	2.0724	2.2639	3.1561	2.4895	3.7054	2.8964	3.2639	1.9433	2.3602
10008	4.5874	4.7898	3.356	3.224	7.6465	1.3839		3.6144	2.6671	3.3056	3.8851	3.2643	2.4752
10009													
10010													
10011	4.3632	8.0448	3.0068	4.2373	4.992			2.5584	1.8546	2.9782	4.4618	3.2691	2.0814
10012													
10013	1.5744	1.2676	1.103	1.6514	1.6289	1.6656	1.5857	1.705	1.7567	2.0425	2.46	1.9965	3.6549
10014													
10015			0.8685				1.3349						
10016													
10017													
10018													
10019		1.0734		0.7771					2.9212	1.9557		1.9119	
10020	2.0584	2.6268	0.9109	2.8268	2.5992	2.4912	6.3964	6.9301	2.0713	4.4521	3.1142	2.3805	5.882
10021						1.1864	1.2387	1.4086					
10022	1.616	1.8317	1.643	3.0473	1.6205	2.9071		3.1194	3.3168		2.7875	2.7438	3.9026
10023													
10024	1.4451	1.3822	1.7195	1.8489	2.2716		1.6872	1.7305	1.6468		2.3266	1.6807	
10025		1.3233		1.2995		1.5067	1.5308	2.0463	2.2643		1.6216		
10026	3.3302	6.7974		2.7768	3.3034	4.7779	4.3969	4.2618	6.9886	6.3923	4.0932	4.0779	10.126
10027	0.9249	1.1571	1.649	1.5933	1.0537	3.0554	4.4054	2.3604	2.2531			1.7699	4.9997
10028		0.7872		0.8377		1.078		1.2845	1.2216	1.4668			
10029													
10030													
10031			0.6985								1.8359		
10032													
10033	8.0583	15.3699	3.7824	9.8909	9.7417	14.1108	18.3087	29.8375	18.3484	18.9374	14.6207	12.4835	20.2378
10034	4.6402	1.9268	1.8222	3.6267	6.0185	4.6963	3.5405	3.4035	3.4086	3.9111	4.6122	3.6819	4.8094
10035											1.6057		
10036								1.1829					
10037													
10038							1.392						
10039							1.6595		1.2795				
10040	1.5761	1.6875	1.5467	1.5971	2.0531	1.8245		2.3617	1.8739	2.091	2.7611	2.1024	2.9055
10041													
10042	1.5457	1.8123	0.9509	1.3098	1.4274	2.3739	2.244	2.61	2.1795	2.0572	2.6786	2.8368	
10043	3.1571	2.7264	6.4031	4.826	10.6277	7.4403	31.4781	9.1331	20.6745	17.2096	22.599	15.1786	
10044													
10045													
10046													
10047				1.153		1.0889		3.649					2.5082
10048	2.4757		1.5635	2.1351	2.5863	2.0225	3.7326		3.9855	4.3536	4.1151	2.7557	4.4521
10049													
10050													
10051	1.1627	1.0432	0.7471	0.9087	1.1355								
10052	11.323	15.0319	13.664	12.9424	23.8834	1.4599	5.2275	5.7215	5.9503	6.2272	6.9672	11.6852	3.04
10053													
10054													
10055	1.0192	1.5321	2.2262	2.5003	5.698	6.54	17.3998	7.1551	4.1585	3.4235	6.8381	9.4979	
10056	4.0075	0.9495	2.5606	5.6653	6.4917	1.2999	1.4051	2.8177	2.8563		2.9898	5.2813	1.8749
10057													
10058													
10059													
10060	1.8483	1.7809	1.548	1.5103	1.8285	2.1456	2.8746	2.0147	2.0886		3.2248	3.0243	
10061	1.2667	1.9188	1.8482	1.2352	2.3474	1.6021	3.6621	3.9584	2.837	3.0846	2.6596	2.4703	4.0059
10062			2.0874	1.4241		2.0601	3.1072	1.8703	3.5253		2.7311	3.1971	2.85
10063													
10064													
10065	1.4558	1.5498		1.3092	1.3083			1.3295	1.4231				2.6722
10066	1.6147	1.1868	2.1449	1.7293	2.7572	2.1474	6.7973	2.0024	5.5502	4.1487	6.665	4.0495	1.805
10067	1.3037								1.5897				
10068						1.0818							
10069													
10070	23.6128	60.902	3.0536	10.044	2.4257	80.3164	9.7614	30.6982	36.6681	32.0656	46.4528	42.0519	49.3807
10071													
10072													
10073						1.3347							
10074													
10075													
10076													
10077													
10078	2.9258	2.2914	2.3521	3.482	3.4017	3.0493	5.8217	3.6504	3.1955	2.881	3.4065	3.6933	3.03
10079	2.7648	1.2355	4.8406	4.6667	2.9214	1.2844	2.9518	2.3996	1.7853	2.9643		1.943	2.6667
10080													
10081	213.4172	191.6946	167.4321	178.1864	219.6488	83.8946	71.8106	109.3338	97.3735	109.0441	135.8643	149.1865	89.9767
10082	7.1526	4.1163	12.7932	6.3962	7.9577	8.5059	7.8826	12.1057	9.7762	14.0763	16.2081	12.1163	7.8629
10083	2.4525	2.0767	1.9447	1.7346	1.4666	1.8313	1.6628		1.3781				2.5141
10084													
10085	2.8551	2.9843	2.0084	2.7324		2.2323	3.6462	5.3156	3.5368	2.7649	3.93	3.6656	5.6058
10086													
10087	1.4915	0.9741	1.1678	1.2068	2.1687	3.3694	5.3938	2.9059	5.1239	5.0126	5.1563	4.5131	
10088	6.3375	6.0488	5.8697	6.9414	5.3289	2.1398	2.0561	3.6563		5.2163	3.9945	4.8912	3.5747
10089	13.2203	6.635	2.5659	3.1589	7.3562	14.9588	8.0188	9.4343	7.9726	6.2948	7.2898	7.9402	26.9726
10090	0.8314			3.5322					2.2133				
10091													
10092													
10093	2.0135	2.9214	2.6555	10.0429	3.6218		8.5443	4.1315	4.6013	6.605	5.8778	6.6522	23.9801
10094													
10095													
10096	2.8703	3.7268	1.9468	2.9748	1.8722	4.5016	2.6386	4.5022	4.6441	4.883	4.5301	3.0387	3.3046
10097	9.1019	9.2472	7.8919	12.0956	14.2289	10.9898	13.7741	13.5116	15.4463	15.5363	19.5713	16.3121	30.74
10098													
10099													
10100													
10101	1.39	0.8891	1.3627	2.0296	1.3886		1.3403	1.4701			1.8965	1.5721	
10102													
10103			0.638	0.9917	1.0579								
10104	1.6758	2.7996		3.07	3.323	2.2018	1.5468	1.6658	1.8732			2.4832	1.7804
10105						0.9435							
10106													
10107								1.259					
10108	1.5852	1.4276	1.5331	2.2401	1.9454	2.8625	3.5214	3.0233	3.0464	2.8594	3.4758	2.6152	4.0756
10109		1.5797		0.8916	2.3582	1.8228	2.089	3.5784	1.9218		3.1776		4.3111
10110													
10111		0.8899	3.4918			1.7337							
10112													
11001		0.878	0.7763	1.5404							1.5285		
11002	46.1623	40.7007	35.2327	48.3908	82.384	62.5656	68.6041	87.6328	74.6506	87.2776	105.8215	114.3828	188.1342
11003				1.0193	1.0484	1.0556			1.3608				
11004		1.2906	0.8156	1.4493			1.3827		1.8881				2.0279
11005	2.5986	2.0473	1.3282	2.0411	2.4963	6.584		4.4562	4.807	4.333	7.1335	4.8596	6.272
11006	153.7563	178.8336	147.7358	159.6505	213.6021	59.7387	52.4328	91.3108	70.1931	78.5841	97.567	108.5686	77.4335
11007													
11008	1.5546	1.8643	3.7058	3.1793	7.4714	4.6494	14.9608	4.3784	14.0859	9.5058	14.05	7.5142	3.9493
11009	4.8107	8.8084	4.1418	7.8051	8.9168	8.9446	8.311	13.1966	6.6756	7.9177	7.2996	9.0214	14.991
11010	5.4137	5.9136	2.2862	2.9501	4.4889	4.8971	3.0455	3.3766	5.4295	5.0045	6.3513	5.7756	3.5912
11011	4.3007	4.0643	3.7632	5.2822	5.7197	9.6493	4.1364	4.9305	9.1421	7.5753	13.9073	8.1308	14.4297
11012		0.926				1.0618		1.2232					
11013													
11014													
11015													
11016	6.255	6.0541	8.0735	13.2733	12.9451	13.6913	14.5246	22.0412	12.9872	16.5468	16.0677	21.8802	18.5159
11017	0.8789	1.1212	0.8565	1.1926		1.1706							
11018	1.2342	1.1736	0.7914	1.8188	1.7391	1.8643	2.1031	1.9322	2.6524	1.878		2.3513	
11019	3.5542	2.6925	1.3913	3.0887	4.8008	2.8891	4.949	10.0361	5.5829	5.0894	6.4003	4.487	8.0602
11020	1.1308	1.1271		0.8609		1.5251		1.4147	1.2191		1.853		
11021	2.0447	1.1592	1.1037	1.6202	2.0769								
11022													
11023	0.8057		0.8907		1.1389	1.0887	1.4062	1.5137			1.8806	2.0398	
11024											1.7569		
11025	0.9934		2.1745	1.2423		7.7225	3.6288	3.8538	3.9047			1.6307	5.0205
11026	9.5611	10.8156	7.5856	9.8203	15.1282	23.4574	21.6631	34.3387	16.7729	14.8023	27.3674	29.4937	22.3092
11027													
11028													
11029		0.797										1.3612	
11030	3.2249	3.9567	1.8291	3.0893	3.8369	2.4882	3.4268	4.6702	2.4479	2.8346	3.1269	3.0395	2.9501
11031	1.6072	1.0648	1.4375	1.7174	1.7597		3.868	9.1659	3.9181	2.4074	3.8524	2.9613	
11032													
11033	2.2151	3.2366	1.934	2.3944	1.7582			1.838	1.705	1.9678	1.6892	1.5868	
11035	1.181	1.3668	1.6349	2.2008	2.245	3.3792	3.9836		2.7298	3.7654	4.668	3.4066	4.8478
11037	1.9343	2.3901	2.0335	2.653	2.5889	2.3172	2.3593	2.7353	3.0567	1.9605	2.374	2.3439	
11038	2.8346	2.1368	3.0576	5.6994	3.968	13.0078	13.863	15.3664	11.3799	11.7304	7.9613	11.5163	11.7846
11039	4.725	7.2994	6.0185	4.5312	5.9669	20.7698	18.5492	27.5725	12.3064	11.873	15.646	15.1715	25.5695
11040	1.6859	1.5958	1.022	1.8052	1.745	1.6949		1.3432	1.6072		2.092		2.0548
11042	0.9152		0.8614	1.0862	1.1829	1.3432	1.3324	1.7055	1.791			1.4018	
11043						1.3814							
11044	14.1587	10.4847	2.9961	4.17	8.2135	18.521	9.9208	12.2825	10.3709	7.9765	16.888	13.399	17.6544
11045	7.1296	4.7248	2.7466	9.4488	5.6532	13.5141	19.8661	11.6739	11.7587	16.1871	19.2422	13.4138	19.3868
11046	3.0246	4.1982	2.0239	2.6545	3.2371	2.6619	2.1412	3.0435	3.2061	3.6709	3.505	2.8328	2.8462
11047	4.997	9.6	4.3669	6.878	5.512	7.5397	6.8027	11.9934	8.5587	3.9061	7.4313	8.4533	7.2411
11048													
11049													
11050													
11051	5.7994	16.4553	6.6227	9.8696	7.9268	3.6215	7.2154	17.7644	9.901	5.6315	6.1719	4.5254	11.0902
11052	3.7822	3.1399	2.098	2.6128	2.6916	9.8926	6.0158	7.8173	5.2179	7.2946	5.6891	4.8931	
11053	4.5363	4.3914	5.6045	3.5223	3.2198	7.5835	5.9038	6.1631	6.2702	6.0574	5.8697	5.8825	9.2833
11054	2.3762	3.999	2.0841	2.8287	2.929	2.1195	2.9774	5.1684	3.4396	3.5651	3.1177	3.1687	2.4317
11055	4.2176	13.6085	2.0794	3.9169	2.1477	2.9555	3.405	3.2368	3.2311	3.0118	3.2922	3.3459	2.5179
11056	1.3856	2.4577	1.1911	2.2045	2.8307			1.7258					
11057	5.5014	3.6492	3.0492	5.1513		8.3708	6.6221	12.49	5.8246	4.787	5.0239	8.1424	3.628
11058	1.4029	2.5884	0.9549	1.4204	0.9788	1.1848	1.8378	1.8176	1.8149	2.0016		1.5792	
11059	3.0797	8.628	4.2186	3.8852	4.1534	19.0363	10.0582	21.8649	16.5748	12.4191	22.4888	13.1305	24.5785
11060	64.3102	47.7134	31.651	50.053	42.9275	49.8467	82.5136	72.0045	61.7156	107.3538	92.7833	97.6405	121.6776
11061	6.3204	11.1946	22.6583	8.6973	10.2304	9.9523	8.7391	12.8719	8.4164	6.3085	8.7943	8.0448	60.8148
11062													
11063	1.1025	1.7421	1.2137	2.4012	2.2476	1.2942	2.3435	1.904	2.2171	1.9206	2.5329	3.6905	1.713
11064													
11065		0.7276	0.6366	1.7411		1.9206		1.4505					
11066		0.8112	0.7732	1.1387					1.0909				
11067	2.0749	3.7891	1.6921	3.3009	2.5951	4.4355	3.2301	5.2766	4.0861	2.4639	2.9344	2.3635	6.6154
11068													
11069		1.0511				1.146							
11070													
11071	1.1358			0.9407									
11072		0.8037	1.0213					1.3875	1.2858		1.9406		2.0891
11073									1.2183				
11074	1.9764	3.398	1.6192	2.0031	1.4989	2.8391	3.0908	3.7795	2.7088	3.2089	3.1685	2.3635	7.167
11075	1.3011	0.8022	1.3083	0.8724	1.4898	5.923		1.698	1.5345	4.1373			11.676
11076	1.1301					1.5351					1.2988		
11077	17.1485	16.2409	17.7607	15.6727	15.6281	7.776	7.6514	11.5094	7.6605	8.8107	8.247	9.9451	4.0447
11078													
11079	1.4136	6.4902	2.682	5.1874	4.4877	1.1136	1.3137	2.0138	2.6571	2.6854	2.3954	1.8363	1.5044
11080	3.0713	1.547	0.9481	1.492	2.9662	5.0366	2.9939	4.4903	3.7666	3.1405	4.908	4.1788	7.0249
11081	2.7662	2.1641	2.2369	2.3685	3.11	3.6796	2.8866	4.3453	3.5191	4.1802	5.9818	2.8894	
11082		0.8528					1.7581	1.6399	1.8843				
11083													
11084	1.1592	1.3379	1.0901	1.4736	1.8883	1.7972	2.0038	2.0535	2.1071		2.1636	2.1678	
11085				0.7384									
11086	10.1173	7.8509	5.8592	9.655	8.993	28.6876	22.6862	27.1051	23.143	24.2267	27.6096	27.3904	31.184
11087	2.5502	2.5682	2.4133	3.0125	3.5375	5.0937	6.9869	5.7688	5.0153	4.2302	4.7348	5.2813	3.0793
11088	11.4124	15.3841	5.5169	10.6252	17.1477	6.8773	12.3898	11.6456	18.3142	14.4868	12.2065	10.8119	15.983
11089	2.5374	2.8421	3.2848	2.6428	2.4625	4.2939	3.9609	6.1313	5.9556	9.1541	6.0225	4.0304	6.1637
11090	4.5833	4.9927	7.0803	9.4918	7.2614	9.3651	11.8424	12.0269	9.4843	7.2605	9.0564	9.2946	18.5949
11091													
11092		0.9251	1.0061	0.9404									
11093	2.5291	2.9522	6.5263	6.9808	5.0499	5.9796	6.4237	4.297	7.5793	3.1574	5.1465		7.8599
11094	1.5441	1.7539	0.8297	1.9033	1.6975	2.6597	2.6759	3.2699	2.193		1.4926	1.9895	3.1686
11095	6.8359	11.2943	10.9777	12.728	15.3349	15.6502	20.4003	21.4056	16.4367	17.5118	21.5509	22.5839	29.6906
11096	1.8572	1.9133	1.9344	3.1334	2.7384	1.8939	2.6848	2.2132	3.3146	2.8027	2.7114	2.6311	
11097	1.32	1.4662	1.7148	2.0309	2.1428				1.0775				
11098													
11099	1.5374	1.4279	2.3667	2.5562	2.738	2.8705	3.6421	2.9711	3.1489		2.9818	3.2333	3.091
11100													
11101			0.8272	0.9652		1.8502	1.4536	1.216				2.0181	
11102	4.1652	5.2183	6.2597	8.1037	7.822	9.4727	13.3485	11.1144	9.6356	6.7726	9.4415	8.4796	7.4887
11103	7.081	2.0526	6.4246	7.4015	3.5198	7.2775	5.2426	7.4264	7.1039	6.1691	5.8607	3.671	
11104													
11105									1.1152				
11106			1.0339	1.2971	1.3544						1.6923	1.7162	
11107	3.0201	3.2082	4.0369	3.5383	8.0294	4.3759	8.1143	12.22	9.0997	10.9449	5.3807	6.2103	13.6811
11108	8.3295	5.906	6.933	8.8179	7.01	4.4521	4.333	6.5428	3.796	7.9342	4.2909	7.154	6.7034
11109	3.3057	4.4518	2.747	3.6151	3.2474	4.0237	5.0463	6.0265	5.1963	4.1817	4.5599	4.0388	13.7836
11110	6.9814	5.0205	4.4939	5.7926	5.9453	5.3416	7.9867	9.8339	7.1015	7.747	4.9808	6.952	15.956
11111													
11112													
12001													
12002													
12003		1.3869	0.7924	1.0439									
12004													
12005						1.6214		1.3553	1.2302				
12006				0.8451		1.5977							
12007	17.6144	17.7132	16.3153	17.7142	22.3706	7.8442	6.8338	11.4331	9.3029	9.9066	10.6805	11.5993	5.9499
12008													
12009													
12010	1.9572	1.9927	1.6442	2.2272	1.9062							1.8941	
12011													
12012	0.9093	2.1034	1.4743	1.1447				1.8818	1.4609		1.921	2.0312	
12014	1.244	1.8451	1.9787	1.9142	2.465	2.3283	3.2613	2.8415	3.4236	3.0668	3.0874	2.4794	2.2833
12015													
12017	1.0297	1.5963	1.7228	2.2665	1.0593	4.3489	1.4231	5.2775	3.8422	2.6992	4.7628	6.4985	
12018				0.7326									
12019				0.9072									
12020													
12022													
12023	3.5087	3.0537	3.2167	3.7479	4.0237	1.8808	2.2951	2.8232	2.7959	2.8389	2.4488	3.9042	
12024									1.2071				
12025		1.6018				1.473	1.1364	1.3434					
12026	1.2359												
12027	1.5275	1.6085	1.4284	1.5966	2.0565			1.7092		1.5382			
12028													
12029													
12030													
12031		0.944			1.2387							1.4114	1.8525
12032													
12033													
12034													
12035	2.0961	3.0681	2.2718	3.3646	3.4549		4.9577	4.4879	3.9362	3.0994	4.8778	4.4506	2.7471
12036													
12037		1.2792	0.8478	0.7391									
12038													
12039													
12040	2.011	2.4778	2.2108	2.8075	2.8208	3.3772	3.8761	3.8285	3.8938	2.8989	3.6664		2.2879
12041	1.8474	2.1203	3.3156	3.1466	3.508	2.9758	3.2216	4.8067	2.7051	2.1056	3.5983	4.0292	1.688
12042													
12043	1.1941	1.3077	1.2637	2.2953	1.7594							1.723	
12044								1.4644					
12045					1.0972								
12046	2.2117	1.9688	2.3686	2.4571	2.4544	4.0937	4.5332	4.3353		3.8368	5.5578	4.7632	2.9699
12047	5.3628	4.7985	5.5271	8.3097	8.4898	1.002	1.8199	4.9883	1.9513	2.8646	3.6794	2.4635	1.7707
12048	17.8006	21.3582	19.5271	19.8668	24.6555	16.0486	12.6528	24.201	13.6115	14.3357	20.3115	25.1415	12.4903
12049	17.6978	17.3376	15.339	15.7169	16.9736	5.296	3.7723	7.8099	4.8649	7.7744	7.5141	11.9137	3.5461
12050	1.3477	2.0714	1.6054	2.5728	1.6899		1.9352		1.2708		1.6435	1.262	
12051													
12052	1.6378	2.2202	1.6266	1.8715				1.3759	1.4295				
12053									1.2812				
12054													
12055													
12056													
12057	4.0941	3.8031	3.6035	2.907	4.016	1.6953		2.456			1.6338	1.4625	
12058	0.9718	0.9347	1.221	1.1367	1.1525	1.9194		1.8914		3.5139			2.9702
12059	0.9027												
12061	20.5348	35.3991	53.2461	79.2162	51.6601	75.3889	95.2815	105.8633	42.9265	29.8961	71.0551	97.2841	40.0032
12062				0.877		1.7231		1.2497	1.1723				
12064													
12065		0.868		0.8162									
12066	4.2526	1.9244	4.3051	3.1917	2.8012	5.2951	3.9185	3.9537	3.3892	2.7844	5.8234	3.4223	5.6769
12067													
12068			1.1637					1.1308				1.7506	
12069													
12070		1.3785	5.1827	4.0726	2.4157						1.7113		
12071													
12072													
12073	1.3606		1.1895	0.8322		1.0885	1.4751	1.2613	1.1643		1.8663		
12074	0.8378		1.5574	1.1371	2.5937	1.1767	8.5452	1.88	5.5396	4.0509	6.5698	3.6801	
12075	1.4207	0.9528	1.4219	1.4313	1.3621	1.7123	1.4181	1.0955	1.4273			1.5533	
12077	2.3239	2.031	2.5853	2.9432	3.4572	4.1776	5.4976	4.5937	3.3195	4.3862	5.314	5.0466	3.7035
12078													
12079													
12080													
12081		1.0874		0.8772		1.1412		1.5834	1.4297				
12082													
12083													
12085	11.821	11.9906	16.1693	18.7923	17.3797	20.7112	31.3576	21.0179	27.3402	20.0592	23.1899	24.2101	19.5505
12086	1.0563	1.1111	1.9454	1.7627	1.8473	1.1906		1.1832	1.7673	2.4079		1.7062	
12087													
12088	4.4704	3.4413	8.7862	10.9736	7.8406	9.3145	11.2525	11.4191	7.85	6.3366	8.0762	10.9869	5.3407
12089	1.5983	1.731	2.1234	2.3356	2.1913	3.2497	3.3323	2.5102	2.7492	2.6352	1.6298	2.6869	
12090													
12091	2.4156	0.9675	1.5305	1.8332	2.0753	1.1461			1.0841			1.9246	
12092													
12093							1.175						
12094	1.3784	1.752	0.9785	0.8457									
12095													
12096	0.8758	0.9365	0.7802	1.0938	1.5552	1.5671	1.3705	1.9398	2.014		1.9737	2.0046	
12097													
12098	1.2562	1.2577	1.2409	1.457	2.6727	2.4095	4.0755	3.3886	3.1499	3.7014	4.5188	4.0289	3.8462
12099													
12100													
12101													
12102													
12103													
12104													
12105													
12106	2.9111	2.5421	3.2026	4.2341	5.1703	5.9441	11.2556	5.1629	10.1401	8.4529	8.9018	9.3411	13.7186
12108													
12109	1.5511	1.6135	1.9759	2.1257	2.6311	2.6225	2.9084	2.8646	2.1166		2.6399	2.5266	2.7745
12110													
12111	1.3482	1.0198	3.1187	4.9902	3.5219		2.1287	2.3325	1.8995		2.0313	2.6734	
12112													
13001	3.1207	2.6649	3.3777	3.0987	3.421	1.4452		2.3696	1.9088	2.3381	2.6835	2.2408	
13002	1.6758	1.7993	1.1277	1.5642	1.7397	1.9007	2.1895	1.9529	1.9692	1.5017	2.7632	2.162	
13003	2.2519	1.737	1.6911	1.5965	1.8185			1.1424				1.527	
13004	3.7549	4.5276	4.5445	6.2058	6.1294	8.0412	10.6025	10.1595	11.2406	8.4318	10.8291	10.0229	10.3485
13005									1.126				
13006													
13007													
13008		1.8106	0.9014			1.1425							
13009	4.9206	6.027	6.7032	9.9625	10.7242	12.7364	17.6812	15.4377	16.371	12.4338	17.1981	17.329	12.0422
13010													
13011													
13012	1.9117	3.6601	1.913	2.54	2.4094			1.9215	1.9916	1.5535	1.9132	2.2219	
13013		0.851											
13014													
13015		0.8574		1.6257									
13016	4.4065	3.3829	1.654	2.5101	4.0859			1.6993			1.8099	1.8212	
13017		1.6738		1.6051	2.1219	1.6623	2.2162	2.7534		2.0333		1.7048	3.6622
13018													
13019													
13020	1.2171												
13021													
13022													
13023						1.3233	1.3062				1.5605		
13024													
13025													
13026	1.0356		0.6913					1.8059			1.6266	1.6538	
13027													
13029													
13030													
13031	1.8002	3.3057	1.06	1.4649		3.6176	1.5764	1.5527	1.9868	6.1359	1.8953	2.0844	1.9989
13032													
13033	13.2457	15.9136	8.2783	10.3163	12.2778	30.1212	27.4799	44.001	18.686	21.5316	19.4848	20.7265	54.7116
13034	25.1206	29.0644	23.0723	21.4582	26.5074	10.4527	10.4171	14.2209	12.3276	13.8162	16.0562	16.6974	11.0472
13035					1.0568				1.5289				
13036		0.8777											
13037						1.0029		1.3769					
13038	2.3763	2.7698	3.896	3.2517	3.3993	4.9584	8.5602	6.4621	5.0448	5.0062	6.4129	7.9552	3.5259
13039													
13040	1.9414	2.3714	1.6477	2.012	2.0881	1.8992	1.9536	1.7213	2.6832		2.4234	2.7943	
13041	95.9894	76.893	38.6444	106.7633	104.0533	150.3812	242.2914	215.6101	90.3559	114.3467	186.7007	235.5538	33.9792
13042	3.6608	9.207	2.4425	4.9018	4.5304	3.1242	5.3895	1.4345	3.797	4.2184	5.1025	4.4888	7.5814
13043	6.1958	5.5849	4.9979	5.0273	4.9794	2.227	1.7022	3.7649	2.4854	2.741	3.4456	4.0337	
13044													
13045	14.6384	13.9525	10.2537	14.2617	11.9157	3.5854	2.9967	6.5469	4.6689	5.3535	6.5965	8.6234	2.4251
13046													
13047													
13048													
13049	0.7404	0.9592	0.7799	0.9349	1.2326	1.1657	2.1525	1.4239			1.8025	1.3311	
13050	5.688	7.4311	6.7804	7.2756	8.8044	9.0327	12.7471	12.415	10.3602	8.9371	12.8348	11.9747	
13051													
13052													
13053													
13054													
13055													
13056													
13057												1.2842	
13058	12.8938	11.9146	10.9305	9.7212	13.5902	6.274	4.4857	8.215	5.0137	4.6249	7.5093	7.6094	4.0375
13059	2.7535	3.8753	3.1999	1.5826	6.2731	10.5465	7.1356	4.1141	4.415	4.3138	5.2539	10.1542	2.5116
13060	1.3853	1.7659	1.5621	1.9235	1.9999	2.9615	4.4868	3.3025	3.6644		2.8974	3.369	
13061	4.48	5.3306	4.8309	5.5686	6.5491	8.474	8.9617	9.9085	8.8516	7.5886	9.1304	9.4697	6.4176
13062													
13063				0.8245			1.6544			1.5438			
13064	1.4252	1.7638	1.9137	1.5398	1.9783		1.9946	2.196	1.9443	2.7315	2.4335	2.1739	
13065													
13066	0.8474	1.0437		0.9144									
13067													
13068													
13069		0.872			1.031								
13071		1.0481		0.8135	1.2366	1.0805		2.0645					
13072												1.4912	
13073													
13074													
13075													
13076	0.9649							3.2757					
13077		0.8388											
13078			0.6921	0.8768		1.2163			1.2039				
13079				1.1106		1.636	1.3431	1.6726				1.3528	
13080	3.808	3.4596	3.7341	4.338	4.1521	2.0306	1.4968	2.4395	2.0665	2.085	2.3766	3.0653	1.4778
13081	4.9056	9.1161	1.3846	7.3067	4.9572	5.2712	4.8527	5.8123	6.2159	7.5629	5.11	7.5437	12.6949
13082													
13083													
13084													
13085		1.296		1.0391	1.2683			1.0151					
13086			1.2036	1.5957									
13087	1.2729	0.9012	1.4653	1.6229	2.2993	2.2062	3.0052	2.0602	2.5324	2.3238		1.5465	
13088													
13090													
13091		0.9326	1.0642	1.1202	1.4006	1.219	1.492	1.6721	1.6217		1.7845		
13092													
13093													
13094	0.891		2.1763	1.3794	1.3457	3.6026	1.3039				2.0313		1.9645
13095	2.4066	3.2816	4.5724	4.0624	3.7371	3.1428	4.7294	4.9502	4.4649	4.1103	4.2904	5.0799	2.4306
13096	2.1786	1.9556	2.1971	1.7621	1.4438				1.1401				
13097													
13098	1.3367	1.5446	1.9531	1.8391	2.2175		1.617		1.0791			1.8839	
13099													
13100	1.2612	1.2934	0.8602	0.9466		1.5243	1.7412		1.7735		1.9664	2.4927	3.4808
13101													
13102													
13103	1.1055		1.0583	1.1971	1.7881			1.2658				1.5019	
13104													
13105				0.7231									
13106			0.9705	0.7902	1.6325		3.1419	2.1122	2.1807			1.6896	2.3239
13107				1.0276			1.2995						
13108													
13109	1.4728	1.9936	2.4326	2.6351	2.5785	2.3933	3.11	2.7546	2.5237		2.4362	2.4885	2.103
13110	43.5723	37.6893	53.7935	57.714	79.6702	75.9867	95.284	91.8962	74.9374	80.1109	84.0545	89.6699	126.5208
13112		2.1244	0.8935		1.8462								
14001		0.9249		0.9239		1.0439					1.818		
14002	9.4717	20.8604	3.591	12.5263	20.8322	29.5274	17.7577	47.0883	32.7939	36.9275	35.9703	31.8325	33.8852
14003													
14004						1.4196	1.6151		1.2848			1.8547	
14005	2.629	2.3215		2.9021	3.1798	4.5363	2.6983	4.7003	3.722	4.2629		3.6406	7.4753
14006	2.8199	1.5081	1.9779	5.0317	10.9634	2.3252	6.347	2.7873	7.5828	2.9318	4.1662	5.4456	14.3987
14007													
14008	1.8933	3.5224	4.503	5.4669	4.2643	3.9408	4.83		8.1827	4.7937	6.2689	6.294	8.3942
14009		1.0904	0.7767	0.825									
14010													
14011				0.8792				1.1681					
14012		1.0372		1.0149		1.2459		2.3989					
14013	0.8986			1.1028				1.7506					
14014													
14015				1.1098						1.6191			
14016	3.722	2.5592	12.8611	37.6187		13.5518	1.6022	9.1326	1.233	3.2494	8.9823	4.3876	5.9436
14017							1.2959						
14018				1.3318	1.3326								
14019		1.211	0.7999	1.2716	1.9894							1.5685	2.4984
14020	2.7008	2.9295	0.9558	3.5237		5.5972		1.6713	3.0749	3.0775	2.174		35.4526
14021													
14022	2.489	4.5405		2.1272	2.4573	3.3193	3.3266	4.1171	3.8044	4.3527	3.9029	4.8924	
14023													1.9007
14024	1.4162	1.2148	0.9922	1.6133	1.6645	1.3777	2.0828	2.4366	2.2088	1.5155	2.2675	2.4829	
14025													
14026	1.7169	1.9378		2.1355	1.566	2.4719	3.0306	2.3439	2.696	3.3724	2.264	2.079	
14027		0.6476							1.4482				
14028			1.1937	0.9949	1.3392		1.6612	1.4501					
14029	0.9583	0.9376	1.9781	0.8902	1.3806								
14030													
14031													
14032													
14033	6.7021	7.8648	7.2886	7.2845	12.564	8.9396	21.0453	9.326	18.0293	12.2002	21.7207	12.913	6.6635
14034													
14036	1.3944	1.7509	2.6013	1.1988	1.2312		1.3675	1.5469	2.2171	2.0146	2.2581	1.9248	2.0694
14037	6.0896	9.8017	0.6652	2.3373	6.8762	4.1831	9.4282	4.8369	8.2392	12.4424	9.85	5.3085	
14038	1.015	0.9824	1.2134	1.5911	1.535	2.4696	3.875	3.2825	3.0009	2.1104	3.5868	3.1719	
14039													
14040	2.4829	3.2419	2.0519	2.645	3.2385	3.8873	7.45		7.0311	5.0202	5.629	4.4439	7.137
14041		2.455	6.6379	2.5482	1.4418				1.2241				
14042													
14043													
14044		0.885	1.7318	3.3938	2.4027		7.0749		2.595	12.4295		3.8615	3.557
14045	1.1165	1.0884	0.7911	4.0428		5.0015	1.5377	4.133	1.2338		1.4085	1.1783	3.7714
14046													
14047	4.3199	4.0285	1.7645	3.0352	7.3225	14.8764	6.6709	14.5758	4.7393	6.0653		6.0454	16.0084
14048		1.8472	1.1313	1.4479	1.5615	1.9537		1.5136	1.2101		1.5728	2.4382	
14049													
14050							1.2178						
14051	6.278	6.8182	4.1834	3.2681	3.2509	8.8703	4.6251	3.5128	2.9215	3.9378	5.3216	2.0399	
14052													
14053	5.6655	5.7271	6.4011	6.5729	8.1517	12.1685	15.0226	10.0884	11.5678	8.0911	14.6605	12.6396	7.9148
14054	2.1347	1.3078	1.9213	2.1083	2.3932	2.1278	2.4213	2.1895	2.7797		2.8979	2.612	1.883
14055	8.6534	6.4832	6.0834	6.9305	8.94	10.3273	9.6619	15.1521	11.0064	14.571	17.6232	8.6787	15.8668
14056	2.4455	2.8139	2.2592	2.1101	3.0553	1.1022		1.3109	1.3441		2.4252	2.0978	
14057	10.4098	9.001	8.2183	6.8569	5.5235	21.7243	17.6665	16.4356	14.7372	15.1305	7.6014	19.4353	13.5
14058	196.1041	164.6794	268.8944	282.8801	277.1086	323.3812	471.5019	333.5273	291.0262	309.6024	502.1223	308.3269	616.0782
14059													
14060	0.8606			1.1495		1.8975	2.5832	3.5728	2.0993				
14061	1.6487	1.4246	1.4979	2.1943	1.5867	1.86	1.5728	2.3463	1.706	1.7323		1.5001	3.7088
14062		0.9061		0.8029									
14063	1.6705	5.1755	1.3943	2.8138	1.6536								8.8535
14064	3.2173	3.9792	4.0318	5.3824	5.0512	2.3678	2.8771	1.6511	3.1038	2.3537	3.1679	2.5434	2.2595
14065		2.2633	2.0173	2.9604	3.0724	3.6675	5.66	3.6052	2.988	3.7272	4.9856	4.0101	
14066	1.2689	0.7214			1.0378								
14067													
14068			0.7223										
14069	2.3811		2.7553	7.1267	3.9404	3.6718	4.5743	2.8726	6.4879	2.9187	3.5171	3.5764	
14070													
14071	2.767	2.3348	3.0044	3.5884	3.4753	1.6821	2.8725	2.1249	3.0292	3.9103	2.8471	2.358	4.6207
14072							1.5262						
14073		0.7397											
14074								1.3587					
14075	9.935	14.0594	7.1075	7.8447	8.2312	19.4116	8.9991	22.5228	7.4641	8.7261	14.8296	6.5615	7.9824
14076			1.0586	0.6857									
14077	0.7381				1.2194								
14078				1.0209									
14079	1.7702		1.4425	3.4563	2.3777	1.5544	2.0098		1.2193				
14080													
14081													
14082		0.9832	1.2748	1.3252	1.1828	2.31	1.2949						
14083	2.4771	1.9347	2.5672	3.6374		3.0249	2.6138	2.1711	2.8449		3.1166	1.9774	3.5694
14084													
14085													
14086	12.2407	13.3494	5.8306	17.1491	11.4108	25.9406	18.5468	30.6761	27.4407	24.872	21.3764	27.0698	64.137
14087													
14088													
14089	6.2851	6.7439	6.1555	6.3261	8.8856	11.468	13.6452	23.9442	12.7774	12.7868	9.7346	10.8087	14.919
14090		0.6954	0.8405	0.9947	1.8827				1.2956			1.1766	
14091													
14092	3.07		1.2694	2.2871	4.4341	7.4493	2.3821	8.3262	3.021	4.5046	7.0861	4.7132	5.0871
14093	2.5944	1.4583	7.0611	5.6655	10.2	3.6637	14.4067	4.2216	9.5837		9.2992	7.0453	2.7838
14094													
14095				0.8153									
14096	1.4321	1.4348	2.3538	2.3295	2.7541	3.3254	7.2986	4.351	2.9322	2.0503	3.7043	3.7481	
14097	0.9541		1.1237	2.1968	1.4651	2.0288	3.4484	2.0525	3.5154	1.9703	3.3724	2.8908	
14098													
14099	1.211	1.8765	1.7646	1.9606	2.3663	3.148	3.5784	2.8931	2.9192		2.9504	3.1296	
14100	3.0643	2.1209	4.7906	5.7046	5.8219	9.7351	4.8412	7.7685	4.4001	4.4286	4.2386	4.6498	5.3503
14101													
14102	1.0058	0.8346	1.1596		0.9862								
14103	2.6596	2.5207	4.0116	4.3322	6.5008	18.5699	19.5133	20.5032	20.7032	12.4211	23.2881	19.4471	20.1744
14104	3.1718	5.6626	3.2384	4.5557	7.2027	9.3562	7.8907	15.9123	8.1254	9.1262	6.2737	8.0779	9.3349
14105													
14106	8.2258	7.0725	8.3534	10.8995	13.3802	10.8416	22.0034	18.5439	19.7009	12.1665	20.9294	21.0114	18.5343
14107			0.6057			3.1381			1.3688				
14108													
14109		1.5002	0.6744	1.7444	2.125								
14110				0.8439				1.1878	1.4339				
14111			1.1275	1.3589	1.3443	1.5968	1.224	1.4082				1.9098	
14112	2.7561	2.8552	2.5273	5.044	3.6282	4.8753	5.1426	3.91	3.7675	2.9458	4.6663		2.8824
15001													
15002								1.9189	1.298		1.4156	1.4766	
15003	5.7583	5.9624	1.8635	5.2429	4.9319	16.4964	10.6497	15.3824	12.6572	15.2326	15.9225	12.9806	32.9524
15004													
15006	1.7088	3.2947	2.7009	1.9871	2.0832	2.9625	5.5638	3.0381	2.7507	3.779	3.2457	4.3878	3.8635
15007	1.0789	1.7143	0.8123	0.9881	1.8176	2.9405	1.9963	2.842	3.1307	2.113	2.4341	2.0044	3.972
15008	1.0397	1.1689	1.1697	1.6655	2.1696	1.7661	3.0672	3.0617	2.5974	1.7275	2.7313	3.0312	
15009	1.8833	2.3385		1.9987	2.6317	1.5526	1.4129	1.5626	1.6747	1.7039	2.1895	2.0595	
15010	1.1898	1.4006	1.3941	1.6282	2.0571	2.4185	2.7565	2.5813	2.2676		2.7752	3.2855	
15012			1.4861	1.2958	2.0761			1.5604	1.6033			2.1088	
15013		1.1628	0.811					1.4145					
15014												1.7314	
15015	3.3222	1.169	0.9496	1.3375	2.0719	1.2138						2.1913	
15016	2.1589	1.8481	0.7711	1.3167	2.1732	2.5068	2.3495	3.1643	1.1764	1.8064	3.7089	2.6661	3.2731
15017	1.7969	2.69	1.0599	2.1927	3.4268	4.0861	3.83	3.8188	7.0025	7.1832	7.1471	5.134	3.715
15019													
15020	28.655	47.3867	31.8638	51.0077	69.5132	52.5576	97.5476	120.2578	70.6946	49.5803	73.7243	76.7468	159.2088
15021													
15022													
15023	1.7254	1.9431	2.4787	4.9519	3.4191	4.7583	6.9811	6.5559	3.3953	3.1275	4.6797	6.7412	
15024													
15025	236.7878	249.6458	215.4012	217.5427	318.535	181.7481	157.0307	228.7953	199.0765	220.8868	265.0597	324.5633	192.4422
15027	3.453	3.2293	7.0045	4.2845	8.0989		4.9192	3.8357	4.5765	4.1761	5.144	7.7312	2.8711
15028	10.5638	12.0795	11.3416	14.4017	15.7933	9.8147	24.0058	19.9725	23.176	19.7491	16.8101	18.9063	17.9021
15029	2.1396	2.6505	1.822	3.4955	3.6735	2.294	1.8031	2.3957	2.2554	1.9326	3.5279	2.9911	
15030	4.7577	6.0234	3.2622	3.6474	5.7217	7.6229	7.2587	11.0089	6.2299	7.1488	7.629	5.7827	8.7902
15031						1.6202							
15032	2.7628	3.5291	5.9055	5.0921	4.2501		1.7624	2.0386	2.1697	3.349	2.8656	2.8018	
15033	1.9486	2.089	1.6555	2.3149	2.6515	1.7566	1.7231	2.3239	1.7842	2.0114		2.2461	
15034	2.7449	3.9498	2.8788	3.3635	3.3645	5.4785	6.4429	5.7935	6.8473	4.797	5.6556	5.5244	8.8681
15035	5.2904	9.555	11.5709	5.6076	8.4846	29.5851	10.5722	17.3169	13.3314	14.4304		12.8284	23.4245
15036													
15037	3.2229	3.2371	4.2094	4.5853	4.9082	6.0543	10.2288	8.495	6.328	5.6892	7.5813	7.4638	3.3779
15038													
15039													
15040	4.8765	4.6521	3.388	4.7637	5.5355	10.133	10.1012	14.1607	8.0672	9.5309	8.5189	7.3817	5.4378
15041	1.5934	1.0603	4.0966		2.2973	1.6936			1.3673		1.7406	1.7506	
15042	4.2645	3.0243	5.3179	5.9886	7.9757	15.2106	13.8467	9.7641	6.9043	9.5103	13.8281	7.1729	19.364
15043	1.0072	1.6819	0.5693	1.3669	1.7083					1.5904		1.5951	
15044		2.2716	0.7514	1.726	11.6926	2.8139	2.0919	8.0889	9.8529		5.8359		2.5163
15045	14.3809	24.1605	9.6646	13.4698	14.1756	14.7666	39.6654	30.4937	34.2637	19.4314	37.3742	23.8328	39.0062
15046	2.3955	2.7837	2.0255	2.5081	2.6352			1.1393	1.5999			1.9812	
15047		1.1122			1.9939				1.1501				
15048	2.0055	2.6233	2.7612	4.2933	4.1339	4.6656	6.8471	6.6467	4.6522	3.7376	5.2748	7.3747	3.9608
15049	0.9386		0.9509	1.5162		2.3403	2.0005	4.433	2.924			1.8388	2.4946
15050													
15051													
15052	2.205	1.8094	1.4833	1.24	1.4305								
15053													
15054	0.7775												
15055						4.7879							
15056	6.0928	4.7758	6.3338	5.3355	9.1994	6.4619	8.7256	8.758	6.3033	5.5046	9.0082	9.0078	
15057													
15058	2.174	5.7873		3.009	2.7482	5.5826	7.0024	8.2305	3.0168	3.2642	2.9833	4.6169	6.1879
15059	0.8164	1.2635		1.5841	1.2304	1.5774	1.9796	2.58	1.7596		2.267	1.2774	2.0456
15060													
15061													
15062													
15063													
15064					1.6795								
15065	0.8729		0.8165	0.8059	1.1798	1.1199	1.2864						
15066	1.0064	3.2182	0.8613	0.8379	1.3352			1.3674					
15067		0.8244											
15068													
15069	19.9662	12.7287	12.7106	20.5826	23.489	52.9862	64.0359	71.8883	47.2522	43.0908	28.2708	43.1435	109.9758
15070						1.4214		1.814	1.9506		2.1148		
15072	1.0748		1.1169	3.738	1.2525	13.229	1.7687		1.5293				4.6138
15073	1.0779	1.2367	1.095	1.5405	1.0713				1.1837				
15074	10.9287	11.0478	13.096	9.8078	12.6461	5.2712	6.0494	7.6255	5.309	6.3973	5.9835	9.3367	5.0204
15075	1.28	1.5071	1.2112	1.6203	1.7077	1.6664		1.4602	1.6307	1.8939			1.753
15076	1.2907	1.3536	1.0183	1.4425		1.3047			1.5417			1.4717	3.2728
15077		1.3084	0.8725	1.2809			1.4551	1.8973	1.5517		1.6982		2.5953
15078	0.9389												
15079	8.5356	8.9177	3.2929	4.7193	9.6235	3.4604	4.9636	11.551	5.5099	4.8392	5.5356	8.1976	3.3467
15080													
15081													
15082	0.996	0.8635		1.0627	1.2027			1.0458					
15083	54.4342	62.6354	67.7384	94.4463	90.0445	91.3665	137.1746	111.3109	93.4178	106.7735	135.3068	124.9758	
15084													
15085													
15086	9.4536	10.1875	7.5778	10.067	9.9929	16.7621	15.9982	12.329	18.6958	15.3643	11.0867	11.3493	17.0846
15087	2.0948	0.8515		13.8572	1.209	5.4224	19.3898	4.4406	36.978	2.2228	3.8904	15.1496	
15088													
15089													
15090	1.3159	2.8932	0.8945	1.3292	2.243	1.8894	1.8501	1.5668	2.2701	2.8684	2.7056	2.1592	2.2279
15091		1.8506	1.5974	0.8698		2.2629		2.5467				1.438	2.7596
15092	1.1422	0.9631			1.8256	1.0839		2.1773	1.423		2.2199	1.5214	
15093							1.1484						
15094									2.047				
15095													
15096				1.1825	1.4381								
15097													
15098	1.4313		1.6072	1.5085	1.6899	1.0799		1.2131					
15099													
15100	1.1767		2.6532	2.97	1.2583	3.9482	7.5792	5.3611	4.5803	16.7586	15.7085	3.5291	6.381
15101	1.7848	2.0247	4.0541	1.8532	2.2415				1.2749		1.5752		
15102													
15103													
15104	3.1169	2.2892	2.8321	9.1528	5.6981	6.4763	4.2295	10.2042	4.8628	3.7623	6.646		13.6344
15105		1.3584	1.2498	0.8693									2.7676
15106													
15107													
15108	1.0922	2.0633	0.8836	1.1073	1.3734	2.5389	2.4069	2.011	2.2745		1.9757		2.3986
15109	2.5921	0.9034	3.7595	4.8685	4.1051			2.2219				2.2281	
15110													
15111	0.9178	1.5002	2.902	2.449		2.4281	2.9447	4.1864	2.3544			2.243	4.9223
15112	4.3349	3.829	4.104	5.8194	6.8738	5.7863	5.7646	6.5099	6.2425	4.4977	5.2515	4.8742	
16001	1.6289	4.0724	0.7967		1.4412			2.4949			1.9851	2.4051	
16002		0.8011	1.1903	1.0208	2.1398		2.6157	1.2871	3.2239	1.6994	3.4531	2.3248	
16003	10.9287	12.6526	10.6165	20.2931	23.3528	19.722	14.6902	22.6186	19.951	23.5207	28.4492	30.7479	29.4455
16004	9.8019	16.0162	8.5109	12.6105	14.3095	15.5913	10.4982	8.6528	17.7187	18.8032	21.1128	18.1771	31.7367
16005	1.1651	1.6069	0.7766			1.2744					1.4503		
16006													
16007	1.4773	1.4701	0.8116		1.1294								
16008													
16009	1.6668	1.7032	1.5891	1.7823	2.9684	2.0605	3.3501	2.3301	3.6182	2.6364	3.418	3.4932	
16010	7.7636	4.3918	8.7914	14.0259	14.4691	18.3746	16.6821	13.7107	23.8963	15.1685	25.5182	24.3154	19.7478
16011	32.739	32.7903	8.0416	30.9351	15.1998	23.6395	45.8359	67.3442	77.3958	78.6471	73.3283	48.6305	11.7057
16012	0.9979	1.5504		1.0232	1.4039	1.432		1.4726	1.3936				
16013													
16014	3.8637	4.6452	4.1683	6.6537	6.5246	5.6704	7.9743	9.5979	6.4339	6.6314	5.9118	5.6559	8.8131
16015													
16016													
16017	4.6832	9.7434	4.9877	13.5201	17.17	4.2917	18.2271	17.9746	10.9721	10.2959	12.9143	10.7119	31.1219
16018	1.1148	1.1648	1.153	1.3148	1.6924	2.0413	2.5368	2.3411	2.1674	2.0703	2.5781	1.9885	
16019	0.8554	4.5346		0.9822					1.5562			2.5387	
16020	1.9189	1.8543	2.0681	2.4605	2.6982	3.2049	4.6425	3.5727	3.1208	3.0595	3.8174		2.2693
16021	3.3302	3.2818	1.9646	1.8638	1.842	9.1464	3.1355	5.2024	3.226	7.9149	6.4338	4.7995	9.898
16022	1.5005	1.8283	1.3568	2.602	2.2107	2.3321	3.5021	2.4553	2.7441	2.7796	3.0213	2.9893	2.3536
16023													
16024	1.8021	4.4111	1.3995	2.5224	2.4578	2.5198	1.9399	3.2823	2.0021	2.7966	3.1988	2.8883	4.9362
16025		1.4646				1.037							
16026	2.0002	2.5944	1.5721	2.8816	2.1798	2.8306	3.4122	3.941	3.79	2.97	5.15	4.1084	3.6182
16027						3.1594							
16028	0.7508	0.6561	0.8999	1.1954		1.219			1.424				
16029	4.8538	5.1471	6.2921	7.5135	6.801	6.2968	9.5038	7.4725	8.6861	6.3757	8.167	8.3759	
16030													
16031	2.3733		1.2968	1.4485	2.3326		1.6422	2.6492		3.7952		3.4497	
16032													
16033													
16034													
16035	19.4968	22.7973	10.7215	12.019	17.5969	42.9719	40.2958	47.3768	58.7186	38.8512	43.1882	37.0254	74.0634
16036													
16037	1.988	1.6583	0.8285		1.6571								
16038	0.9808	1.6147	1.021	1.7974	2.2092			1.0563	1.376				
16039	2.6519		1.1278	2.3786	4.1838	2.2906	5.5257	16.5799	6.5156	5.185	9.275	4.0873	
16040	0.889	1.2939		1.0059	1.6341								
16042	0.9753	2.2685			1.9783			1.6032	1.899				2.2844
16043													
16044								1.1416	1.412		1.5795	1.3121	
16045		3.3328	1.687	2.1404	3.1083	4.5956	6.4003	9.8107	5.2127	1.7778	3.8437	4.6607	3.3411
16046		1.1918											
16047	1.0141	1.9001	1.1999		1.7362	1.7879		1.9326				3.1513	5.1525
16048	2.2189	1.9811	4.5835	1.4419	1.9168				2.2861	3.3429	2.8924	1.8048	
16049	3.4692	6.0851	3.4943	4.598	4.0517	3.9033	5.7586	4.3987	8.1056	7.3959	6.8657	5.4649	8.5001
16050	168.9367	179.2091	146.5776	166.059	189.0615	66.3101	64.3267	113.1415	71.7187	85.7897	96.9097	117.9888	54.128
16051													
16052	3.1696	3.3208	3.2617	4.7981	3.3466	6.3229	4.9144	5.1269	6.1209	5.5573	5.0655	4.456	3.9358
16053	4.368	4.4408	4.4724	5.2946	5.8906	8.5073	20.9213	8.4243	7.4134	6.669	10.6871	10.1958	2.9084
16054	3.1062	4.0924	2.4204	3.491	3.5809	5.8867	9.3424	6.4543	6.301	5.9459	6.2552	6.9831	5.9283
16055	4.4075	4.4515	3.297	4.3251	4.6963	7.2664	6.7694	6.679	5.7702	4.9932	6.9283	6.5513	4.6169
16056	6.2947	7.4049	3.3521	5.4085	5.3743	4.8045	5.6523	5.0734	8.072	7.5486	6.1334	4.4448	8.5543
16057	1.8638	2.1747	1.9779	2.411	2.7959	3.0556	3.8588	4.0401	3.8044	2.8618		3.4788	
16058													
16059	2.0723	2.3783	2.6753	2.6351	3.8534	2.9077	5.3695	3.8069	4.0631	3.166	4.8461	4.1266	2.1409
16060	2.7936	7.188	2.4614	6.22	3.0986	2.1396	2.9035	4.3241	5.088	2.8651	3.1661	2.6621	2.7264
16061						1.1651			1.4799	1.7349	1.8597	1.3494	
16062	1.6503	2.0078	1.5794	2.5505	2.6749	2.845	4.7726	4.6507	3.4412	3.5361	3.4584	3.6669	
16063	1.1647	2.1564	1.2174	2.1128	1.6159	1.3213	1.6499	1.352	1.6056				2.5264
16064	1.3237	1.8631	0.803	0.8682	1.6014								
16065													
16066	1.1731	1.6135	1.4809	2.094	1.8554	4.2502	3.9384	3.6401	4.2366	5.6072	4.1896	3.4271	
16067	1.1756	1.5506	0.861	1.1566		2.1573	1.9654	2.2003	2.1166		2.5206	2.4797	2.908
16068													
16069													
16070	1.4019	1.3314	0.9459	1.7196	1.3867	1.5183	1.2848		1.2602				1.8472
16071													
16072													
16073													
16074	2.5888	1.6954	1.1577	1.6325	2.0969	1.9684		1.6098	1.9554			1.6263	
16075		0.7866	0.9333										
16076	215.2976	211.0065	196.6899	161.0668	215.9662	81.9871	77.3124	118.7863	83.3836	107.1423	108.775	131.1438	55.4217
16077	17.5318	12.0134	16.3443	15.5689	16.9969	42.9319	41.7616	36.6328	48.9842	34.3551	48.5819	44.0101	57.85
16078													
16079													
16080	1.8894	1.6631	1.6737	0.8324	1.9948	4.2043	1.633	1.9627		2.1151	2.0503		
16081						1.5146							2.4003
16083	0.8072	1.2943	1.3262	1.3948	1.4181	2.1078	5.3319	2.3254	2.9173	2.9969	3.139	2.9354	
16084	32.6915	30.2767	33.1326	37.2919	44.6834	48.6938	84.528	101.6887	55.3431	66.0556	101.8325	90.2498	117.2548
16085	5.8505	5.9121	7.4469	8.6337	9.7075	11.8826	17.1455	13.7906	14.6613	10.7003	11.8304	14.548	5.3708
16086	2.019	1.2257	1.5455	2.0437	2.1165	1.8064	1.7334	2.5986	2.5636		1.9004	1.9526	2.6659
16087	7.4507	11.716	8.3454	8.1533	9.8873	13.4147	11.6489	32.0396	12.1204	9.8597	13.2531	8.2449	22.4887
16088	1.4699	2.5677	1.6482	2.2769	2.6171	1.9613	1.8448	2.0941	2.3591		2.1639	1.7052	4.9943
16089													
16090						1.2392	1.7626	1.1373					
16091						1.2855		1.2694					
16092													
16093													
16094	0.9512	1.3311	6.4148	5.862	7.288	23.4484	30.0879	3.1679	15.1879	16.2387	16.7907	13.5328	28.3367
16095	7.5018	8.457	3.6207	7.234	6.5157	9.5437	21.7888	43.899	33.8782	8.5893	16.9894	8.06	27.4862
16096													
16097													
16098	9.026	9.6561	7.5673	11.9586	15.6437	22.2326	17.169	43.1877	17.8736	14.1884	13.2476	16.1399	24.3441
16099													
16100	2.418	2.9347	2.6321	3.9136	3.3638	4.4792	2.522	3.7913	3.306	2.9066	3.2523	3.1107	5.0425
16101			0.6819										
16102	2.3643		7.1352	4.1257	1.4302	4.793	3.0651	5.2718	2.201		2.4792	3.3188	8.9731
16103	0.9655	1.1819	1.4958	1.2424	1.2357	1.9122	2.2477	2.2136	2.3647		2.1458	2.0933	
16104		0.6376		0.7724									
16105	2.3156	2.2034	3.5876	4.0237	4.2556	4.582	4.2115	3.8606	4.2519	2.8739	3.0233	3.7993	2.3489
16106													
16107	0.8834	0.8983	0.9353		1.1875	1.5156					1.7116		
16108	3.5323	1.8726	3.1617	2.4415	1.0123	4.2702			1.9999		1.8359	1.4122	5.6482
16109	11.1738	17.9382	15.6055	21.535	32.4758	38.1893	50.9158	46.3578	41.6319	37.2745	41.3542	34.214	38.4281
16111													
16112	1.4749	0.6643	4.3825	2.8315	8.1783	1.6865	13.1721	2.4411	8.6167	5.8973	8.5833	6.0507	3.098
17001	10.7188	20.3615	3.8018	9.2072	22.5381	6.4571	17.3945	21.6449	17.5517	26.9191	29.3379	31.9931	13.5191
17002			1.4847	0.7405						1.3478		1.5368	
17003	8.2136	7.4593	7.7921	14.832	17.4031	11.0724	8.6135	13.5659	11.8188	16.0531	15.0292	17.7575	15.6108
17004													
17005													
17006	4.3719	5.235	5.7587	6.7087	7.902	7.6257	9.5419	9.0336	8.6303	7.8873	9.7293	12.6043	4.1213
17007		1.0351	0.8957	0.8455	1.4427	1.389	2.3559	1.8871	2.3774		2.9014	2.5165	
17008	2.4209	3.0537	1.8582	2.7906	2.1499	2.5267	2.6995	2.784	4.0562	4.2502	3.6787	3.7269	6.9641
17009	12.7421	18.6549	12.6978	14.9516	24.6213	14.0182	10.1731	19.6917	12.5643	10.8352	14.5984	13.7303	34.0786
17010	1.1866	2.3286	1.0076	1.8928	1.4229	6.1858	2.6412	5.0584	3.3085	4.9704	5.5593	3.7021	3.2427
17011													
17013	9.0218	10.0616	3.5753	9.7886	7.1607	10.0527	15.0029	22.7975	21.0467	22.2466	16.6759	14.9761	37.9275
17014	2.2689	2.0453	0.7924	1.5065	1.4322			1.5489	1.6401	1.4899	2.209		
17015	0.9746	1.6773	1.477	2.5243	1.7081	1.3322	1.7619			2.2475	2.7891	3.0519	2.1071
17016		0.9892				2.3078			1.5252	2.7747		1.3323	
17017		1.177	2.6562	5.0019	1.3155	6.9461	2.6362	3.7322	5.1135	1.5959	2.5017	2.5469	4.5825
17018					1.1328								
17019													
17020	2.3373	3.9662	1.7637	2.4413	2.6975	7.8804	5.4246	7.6405	8.3417	8.7178	6.4051	9.3656	13.1568
17021		0.9137		0.7883									
17022	1.2978	2.0567	1.1134	1.4216	1.4566	3.2207	1.7996	3.642	2.5921	2.5085	1.9261	1.8619	4.2078
17023	4.6761	4.2412	3.5869	6.24	7.5135	16.0214	27.3335	18.9719	24.2582	18.6357	29.9469	28.8202	13.0188
17024	1.6442	2.6032	1.1072	1.9128	2.2458	2.0804	2.1484		2.6065	2.1626	2.2207	2.5909	3.3757
17025													
17026	3.7865	5.0893	4.0472	6.211	6.2665	9.0218	11.2226	11.7005	9.1012	6.5429	8.8858	9.9978	8.0819
17027	1.6608		2.4143	3.6271		3.9282	4.9783	5.2766	4.0763	3.4536	4.2869	4.2082	
17028	1.3352	1.2857	1.4812	1.443	2.2334	1.7366	2.2939	1.8983	2.1207	1.5361	2.1374		
17029			0.9407	1.6586	1.0821	2.6143	2.6628	2.4849	1.9481	2.0055	1.5365	1.9058	
17030	6.953	4.2788	6.0124	25.2987	11.8108	4.7077	8.4709	5.7106	10.4813	4.9214	5.0991	7.485	22.7108
17031	5.3499	10.1624	4.6621	8.0193	5.6803	3.1731	3.0819	2.4903	5.5916	5.4861	4.3519	3.5623	3.2583
17032													
17033													
17034	1.3609		1.104	0.8636	1.5892	1.7061	3.0455	1.497	3.6273	2.5711	4.0156	1.4623	
17035	2.1893	2.9603	2.1872	3.3833	3.0086	8.7196	3.9052	3.353	5.1602	2.5993	5.5667	5.4147	2.108
17036	10.273	9.1418	2.8238	6.1893	6.5917	15.7373	6.7292	6.6656	7.6223	12.3843	16.2986	9.9728	24.0115
17037	2.1207	1.4143	2.333	1.5636	2.2561	2.7491	2.7182	2.5212	2.9294	1.9102	2.989	2.6679	
17038		1.1196	1.1883	1.4189	1.5219	1.3767	1.8971	1.4459	1.9075		2.1964	1.6897	
17039													
17040	2.1727	4.7517	0.98	0.8922	1.1337	3.6218	2.4261	17.0694	3.4425	1.8108	5.4463	1.4756	
17041	1.5803		2.7187	2.3804	2.0455	2.9996	1.7316	2.4928	1.9058	2.548		2.0756	2.9855
17042													
17043	0.9577	1.3593	0.7315	1.8109	1.4363	1.0839	1.4926	2.1642	1.4421	2.4664		1.3501	
17044	2.2155	2.4049	1.6554	2.2462	3.3008	4.9388	6.5251	6.5175	5.1213	4.1651	3.9723	5.1611	3.5136
17045	10.6066	15.3602	7.2585	16.4723	12.1918	11.5125	12.9866	17.9102	16.0039	10.6537	12.4672	10.9396	13.116
17046	1.92	2.4762	3.4169	2.7894	3.7259	4.9003	7.27	5.0445	4.9385	4.6771	5.8376	6.1689	2.3708
17047													
17048						3.0417		1.4684	1.2474				
17049	0.8725	1.2465	0.8292	0.8971		1.3496	2.1104	2.0248	1.8177	2.0247			2.7744
17050	1.0919	2.04		1.9408	2.2589			1.3078	0.9891		1.6364		
17051	1.0701	1.4957		1.3367	1.9905	1.1935	1.3757					1.6392	
17052	1.4804	1.9863	0.8607	1.5452	1.5845	2.0276		1.3495	1.6221	2.0228	2.0756		
17053													
17054													
17055	1.2878	1.7462	1.9655	1.7263	1.6008	1.1542	1.6151	1.6353	2.1803		2.3624	1.5486	
17056	5.8968	10.1776	8.228	12.5085	11.4865	5.9009	13.322	17.1909	10.1432	7.9746	11.6519	9.9257	8.5479
17057	17.4817	28.6242	5.9288	9.36	10.1849	32.6152	14.5338	41.0328	26.6555	12.6941	23.7551	19.4589	18.4655
17058	2.5329	10.2064	6.1002	10.7368	3.8074	12.6606	7.1736	14.107	3.8684	5.8973	5.0982	3.3785	34.0219
17059													
17060	1.0593	1.4843	1.7302	2.063	2.5365	3.7233	7.6051	4.7661	2.9197	2.4263	4.5371	6.3094	
17061													
17062			0.881			1.2812			1.391				
17063	1.1031	1.4087	0.9569	1.4561	1.6893	2.0868	2.7499	3.7774	2.9548	2.7386	2.6698	2.6471	3.8318
17064	9.16	12.0521	6.3859	3.187	11.6384	12.8622	22.6281	17.8197	19.7029	9.4145	11.9862	9.8213	26.0015
17065	3.5627	4.9192	2.1661	6.8921	5.8643	2.0865	2.2882	2.1967	2.8195	3.0017	3.8493	2.4704	4.0869
17066	1.3667	1.4288	1.1304	1.4838	1.3438	1.3906	1.6497	1.7313	1.8905		2.2181	1.5267	
17067													
17068	1.5073	1.3106	2.5261	2.701	3.512	2.9617	7.817	3.2715	5.1871	3.9185	4.9705	4.3283	2.228
17069	5.3896	3.2604	5.0615	6.7355	4.9088	18.8794	17.1903	5.912	17.1841	13.5984	8.3031	9.2493	12.3332
17070	1.5885	1.6498	1.3178	2.3538	1.7354	2.1432	1.7816	1.8348	2.0448	2.8998	2.4801	1.9083	
17071	1.5619	2.3059	1.1058	1.5928	1.5526	2.2697	2.379	2.5903	2.0897	2.9343	2.3665	1.873	2.2959
17072													
17073													
17074													
17075													
17076				1.0284		1.5306	2.4044	1.5712	2.2567	1.6047	1.7817	2.1965	2.8642
17077	6.9657	8.0733	8.0666	9.1653	10.943	13.408	17.2405	26.8836	12.7926	11.8157	8.1966	13.1638	13.9377
17078	1.6677	1.8556	1.5383	1.7366	2.5192	3.4056	3.0871	3.6615	3.4602	2.1436	2.3061	2.9882	3.0871
17079	1.8511	2.163	1.7508	2.4406	2.6968	2.5573	2.916	2.6501	2.2411	2.3951	3.9297	3.0007	1.9333
17080	6.2188	9.2367	3.2657	7.4188	6.6145	9.3055	21.8173	12.273	12.2723	13.3984	11.5636	23.029	6.6705
17081													
17082													
17083	20.3864	29.6851	21.4773	26.601	32.3739	23.1362	26.6919	30.1082	24.3448	24.6599	20.3549	22.9694	39.1614
17084				1.1957							1.3173		
17085				0.7997		1.2661			1.0813				
17086			2.7193	2.1282	1.7026	1.8363							6.8951
17087	6.4225	3.5299	4.0898	9.8792	13.3199	10.2285	21.4053	30.7487	14.8142	6.8377	11.1006	13.266	10.1085
17088													
17089													
17090	9.1281	14.058	13.1158	21.5536	21.3979	31.6103	61.2303	45.6709	57.3551	28.0842	62.1794	33.357	111.7577
17091	2.9014	4.2331	6.4084	5.0123	4.8973	6.5917	10.4908	13.4103	11.3337	12.3712	13.2134	7.5181	12.8985
17092				1.3075		3.6277	2.0264	5.0803	2.2858		2.2531		
17093	1.67	1.6324	4.7797	3.6452	6.5941	2.0311	6.8246	2.2982	4.0861	3.1625	4.2873	3.3335	2.2189
17094		0.7207	0.6628										
17095				1.248	1.1039		2.3326	1.6707	1.4799		1.548	1.5846	2.9529
17096	26.7421	26.2231	33.5888	30.8783	33.5763	9.7472	9.2658	18.3715	10.984	14.1892	13.7459	16.0422	7.1773
17097	4.2585	3.681	2.8119	5.1589	5.2472	3.057	2.8312	4.078	3.7291	4.3328	4.2503	4.6625	
17098	2.4814	2.2306	2.8483	3.0766	2.0358						1.581		
17099	1.2344	1.2344	0.8444	1.3306	1.5537	1.4316	1.3618	1.7137	1.2854				
17100		2.5087	1.1094	3.106		1.8398		1.6308					2.3755
17101													
17102													
17103													
17104									1.1246			1.4862	
17105						1.0577						1.4583	
17106	3.2066		4.023	2.1897	4.176	2.6701	3.3236	12.2121	2.5699		4.3094	1.888	
17107	3.0341	2.9657	2.0335	2.8061	2.7345	2.7037	2.1919	2.0576	2.7864		2.5488	2.3368	4.0074
17108	1.5436	13.0422		5.0275	6.5079	27.6268	3.8288	17.2659	12.4589			2.4087	37.0957
17109	4.1414	4.4792	5.7531	6.0244	6.46	6.6619	11.6274	6.1073	7.2105	7.5104	7.0215	6.9646	6.6193
17110													
17111	2.2764	3.2142	2.0629	2.1442	2.8016	2.2003		2.1416		3.184	2.5637	1.5733	2.5225
17112	4.2157	2.6317	5.6822	9.7014	5.0263	4.4476	5.4504	66.8442	2.6474	4.5444	5.3871	3.3697	9.4564
18001		4.0165	4.5025	4.9054	5.2915	5.2881	5.395	5.0804	5.9392	4.2235	7.8314	7.7824	3.0439
18002													
18003	6.7961	8.5545	5.0776	9.3867	8.8844	19.4595	10.7354	12.6664	6.7149	10.221	10.5139	8.6385	11.5044
18004	6.3119	7.6252	7.5844	10.7534	6.9354	18.8332	11.5462	10.7681	14.9986	9.7158	14.9383	9.8097	21.6935
18005	1.6769	2.2757	1.439	3.0037	1.6003					1.7714			
18006													
18007													
18008													
18009													
18010	6.3475	8.204	8.1575	9.6374	10.7783	11.6443	19.7646	12.4805	11.4728	10.1467	13.1716	16.3376	
18011	1.0643	1.7137	0.886	0.8855	1.6897	1.4467		1.3131	1.4931			2.2825	1.9094
18012	3.8847	2.4414	2.6618	2.6013	1.8756	3.5194	2.4791	3.5711	5.1793	3.531	4.0448		5.5701
18013			2.2304	1.7752		1.6006	2.8653		1.373		2.7004	2.0398	
18014													
18015	0.8901	0.8721											
18016													
18017	1.9873	2.514	1.6159	2.0117	2.1701	1.4947	1.4468	2.4946	2.1023		2.5851	2.3038	2.0694
18018	7.2312	23.0445	2.2228	7.0755	7.5172	4.0598	9.5426	28.9948	11.6904	14.5854	13.552	10.9616	10.5084
18019	1.6009		0.9943	2.0709	1.6209	1.7709	1.301	1.8884	1.7028	1.4544	1.7395	2.0309	2.5872
18020	3.7814	5.3235		1.9744	2.4675	4.8441	2.6265	5.8286	2.1434	3.8124	5.3111	3.7114	3.5981
18021	1.9954	2.034	1.905	2.1424	2.6692	3.1323	3.6926	3.2351	3.1806	3.3903	3.902	3.9533	
18022		1.4467	0.99	1.3092				1.2061					
18023													
18024		0.7885		1.1841	1.2916								
18025	2.3573	3.2711	2.3789	2.7868	3.7017	4.4016	7.3634	8.689	6.098	4.8191	6.65	8.0761	6.8285
18026		5.2961	2.9644	4.9962	5.2106	6.885	7.601	9.0173	10.858	6.5148	9.4676	9.0061	6.0368
18027	1.4339	1.9082	2.5723	2.2338	2.1367	3.6009	3.6375	4.9684	3.3978	3.652	4.8982	3.2431	4.265
18028	1.1389	0.9571		1.0265		1.6038		1.537	2.0073	1.9174	2.0046	1.8222	4.0875
18029	6.3316	7.994	7.6548	12.0495	14.0727	17.0312	25.6415	16.6265	15.2235	16.3468	16.1025	16.9147	6.6091
18030													
18031	4.1184	3.7559	1.4814	3.1523	2.0345	4.6806	5.2203	4.8936	6.3775	6.8806	5.1208	3.7537	3.43
18032	0.7814	3.3201	0.6238	1.1076		4.1077			1.5089			1.9552	2.8415
18033	1.4868	1.88	0.8643	1.941	2.003	1.5261	2.9704	2.8962	2.5418	2.2554	2.1108	2.7866	
18034	1.4069	3.9438	1.4518	1.9595	1.5279	3.0403	3.0179	2.2776	2.131	1.7661	2.4409	4.0685	3.8105
18035		1.2208	0.7025	1.2915	1.6353	2.2833	2.2134	2.1981	2.101		2.73	2.2893	
18036		0.9019	0.9039		1.1629	1.7256	2.1939	1.5027	1.6959			2.3442	
18037			0.8717	1.1443		1.8766	2.367	1.6566	1.5015	1.6577		2.0078	
18038	2.4299	3.0579	2.5226	4.7613	3.8499	4.6143	4.68	5.3536	3.9787	3.1009	4.6057	4.4334	5.9163
18039													
18040	0.9025	1.5093	0.7502	0.9582		2.3244		1.506	1.6483	2.5516	1.6202	2.4251	2.5432
18041	12.3688	12.867	7.7712	12.4983	13.6519	19.2724	26.2323	40.7539	18.7162	22.2547	20.9673	12.9457	34.6529
18042													
18043													
18044													
18045	1.9998	2.2493	0.8801	1.5016	2.3182		1.8434	1.2357	2.8425			1.2809	4.3863
18046	1.2133		1.0965	1.8744	1.0828		1.7978						
18047	3.9994	3.4969	2.253	5.1073	6.7147	4.987	6.775	15.0305	5.3	5.5221	5.6022	5.167	7.7943
18048	3.7897	7.4208	2.5457	4.6747	4.5775	4.2137	6.757	6.9621	6.7387	6.2892	5.1815	5.343	9.9764
18049	1.6156	1.3292		1.5022	1.5001				1.7037				
18050													
18051	12.8382	13.9519	16.6672	14.0297	23.8314	28.5094	37.9528	22.9798	23.3888	16.5479	25.8455	25.5286	11.8065
18052	1.3301	1.12		1.7419	3.7112	3.1253	9.7872	2.7896	7.2562	5.0575	7.5092	4.1494	2.9013
18053	3.5807	4.1208	5.5229	5.4276	4.0399	6.3623	4.9082	6.3322	4.8709	4.157	5.2215	5.7641	5.2758
18054		1.1069											
18055	3.6496	14.8839	3.6856	6.3568	9.2222	7.6211	12.8305	8.5747	9.35	8.1996	10.1963	7.0899	4.5922
18056													
18057													
18058	0.9419	0.9772											
18059	1.2407	1.1024	0.8443	1.5707			1.6628	1.4277					2.0037
18060	18.0283	17.8148	7.2761	13.082	17.28	34.3266	21.5239	30.8182	22.3749	18.7036	22.6326	23.5179	38.2964
18061	2.0128	2.2197	1.348	2.6142	2.4083	1.5434	2.3508	3.2121		3.8806	3.012	2.4965	3.3353
18062	4.9449	5.9293	2.4371	6.5526	5.9134	10.3957	9.8676	10.3681	11.2887	9.7943	11.5882	9.9397	10.6633
18063	2.5719	4.1696	2.6445	2.5855	4.5318			1.6539			1.5505	1.6643	
18064				0.9721			1.4481	1.2775					
18065													
18066	1.6508	3.1727	1.4466	3.3961	3.0386	8.9517	4.5884	3.9262	5.4463	3.2116	4.9825	4.0164	21.6806
18067	4.819	6.9909	6.7846	8.0162	7.0595	39.4859	14.7757	21.5084	15.3279	14.9977	15.9642	15.8974	21.9619
18068	2.114	2.8837	1.6458	2.2779	2.1247	1.7672	3.2342	3.8214	4.1242	2.9434	2.6302	2.5906	5.4354
18069	4.8781	4.9818	3.4823	4.5462	4.2332	7.8202	4.901	6.828	5.823	8.1186	7.3393	5.0114	10.255
18070													
18071													
18072													
18073	6.4009	6.1358	16.4709	20.508	4.7499	17.7545	9.042	17.9275	11.1546	8.639	6.2428	10.1168	15.7972
18074			1.0912	1.1583		4.9149	2.9305	2.286					7.8654
18075	13.3535	17.8084	13.9295	23.5262	20.4949	10.1374	7.8605	15.9155	12.8782	10.1253	10.8984	10.1601	35.0104
18076	3.3474	2.0042	2.1976	2.4364	2.777		3.2305	4.1011	5.1693	5.7245	6.7493	5.2947	5.0024
18077	0.8873				1.4042	2.0992	1.9082	3.3323	1.9622	2.4751	2.2423	3.3297	2.493
18078													
18079				0.7375		2.0303							
18080	0.9453			0.9126					1.2558				
18081	1.2015	1.1175	1.1852	1.646		2.2662	2.5049	2.9487	2.7202	2.0576	2.5313	2.8846	
18082	6.3182	7.4643	4.9881	6.2459	6.613	8.3551	12.0126	10.2293	10.6362		10.7392	9.6175	8.1989
18083	3.2674	5.3652	2.6677	4.342	3.3748	2.9305	2.4617	3.4061	4.6083	1.8017	2.7093	3.2572	3.0127
18084													
18085													
18086	2.048	1.8261	1.4097	1.0967	2.6802	4.5684	10.8634	11.3206	17.5576	9.5148	11.4605	14.1215	12.2874
18087	1.3529	1.7589		1.0178	1.0302	1.1211		1.4042	1.6225		1.8617		
18088		6.1525		2.8248	1.4266		2.0723	5.0619	2.4422	2.9388	3.4169	3.8005	3.1612
18089	0.8863	1.2321	1.3855	1.4966	1.2377	1.8965			1.6973				3.3016
18090	18.8406		14.7013	8.3241	6.4695	1.1401	26.0981	11.5523	1.5267	13.054	4.4109	3.7092	
18091								2.051					
18092													
18093	0.9718	1.0898	0.9169										
18094	1.3316	1.1149	1.4988	1.8739	1.3568	1.8084	1.6485	1.8277	1.4108	2.2646	1.3305		
18095	9.9416	6.494	4.8011	7.7943	7.4998	13.0398	2.8465	8.9288	4.6464	4.957	8.9855	5.7019	3.3229
18096	0.9149	1.4236	0.8154	1.302	2.3739	2.1512	3.5219	1.7064	2.5989	2.8513	2.2347	1.5421	
18097				0.8057									
18098	1.3823	1.3168	1.6363	1.35	1.5607	1.778	1.4914	2.3445	1.9405		2.6097	2.3439	
18099													
18100													
18101	1.8092		1.0395	2.2387	1.7539	3.1108	3.5153	4.6702	4.393	4.1844	3.8405	3.5207	4.8856
18102	5.8627	5.3981	8.6095	10.6826	9.3822	12.7718	14.4174	16.317	13.2958	13.4412	12.5327	11.7871	23.0539
18103	0.8225	1.3115	1.7829	3.0706	1.0148	1.7989	1.4586	1.7938	2.1609		2.221		
18104	1.4716	0.8006	3.1568	2.6387	5.1036	2.1901	9.0347	3.1191	4.5881	4.0582	5.6414	3.3643	
18105		2.9118	1.0215	1.2317		2.3827		1.4203	2.2955				
18106	1.0419	1.6969	1.1637	0.9899									3.993
18107													
18108	1.7146	2.9582	1.4292	1.7728	1.9877	3.3867	2.8683	3.5698	2.9618	3.6924	3.3607	2.6247	6.6211
18109				1.1145									
18110	15.8328	13.4448	18.6757	19.1822	19.7987	10.6527	6.8168	6.5014	12.1672	12.9735	14.7528	8.5484	22.3771
18111	1.7047	2.5482	1.1543	1.6206	3.0295	2.3129	3.8772	4.3037	6.0561		6.3554	1.8162	1.6927
18112	8.9238	9.1754	14.7656	9.0637	8.3102	11.8948	10.8748	7.0339	5.0937	3.9423	6.405	4.3944	5.845
19002	4.1729	3.72	3.2472	7.1775	6.9019	2.028	1.8303	3.8393	4.4431	4.5044	5.8847	4.2699	5.9219
19003	1.1398		11.1638	1.1486	4.4085	3.6789	13.9108		1.1381		10.5535	2.9716	
19004													
19005													
19006	0.8736	0.8016	1.4788	1.2482	1.011	2.4043	2.0114	1.541	2.4584		2.4261	1.7627	
19007													
19008													
19009	1.1779	0.7482	1.6169					4.9824	1.5629		1.6964		
19010													
19011	1.0291	1.1419	1.4479	1.8052	2.8009	2.7517	3.9721	2.6218	3.7675	2.5031	4.6118	3.2544	
19012													
19013	2.2145	2.1963	2.7237	2.1577	3.7391	2.3343	4.9784	2.9126	3.0723	2.7027	3.4912	3.9163	3.3112
19014		1.1655											
19015													
19016	0.9843			1.0286		25.0481		29.1954			6.7323	6.4677	5.0734
19017	10.9055	13.2723	16.9878	5.4419	12.6883	37.6299	23.2153	13.4118	26.8818	16.2904	14.9299	18.9398	15.6176
19018													
19019													
19020				0.9527					1.5995			1.5296	1.8591
19021			1.0705	1.1881		1.0879		2.6023	2.1184			1.8967	
19022													
19023	27.7061	21.5179	26.6337	34.14	28.9805	109.3005	83.2236	72.5566	79.3086	54.8445	93.745	97.2045	163.2536
19024	9.2427	4.0416	28.7196	20.7959	65.4809	28.1295	174.2192	33.2604	104.6239	94.3299	119.3844	69.5832	21.7218
19025													
19026													
19027	0.925			0.8352			1.4286	1.462				1.8409	
19028	0.891	0.8635		1.3483		1.6049	2.3233	2.0377	2.0479		1.8514	1.9669	
19029	3.3674	5.6988	0.9495	1.7081	3.3922								6.9314
19030		1.7737	2.4449	3.0066	2.6349	3.4673	4.8655	4.1578	2.8583	2.5938	3.3924	3.5213	3.2391
19031	1.6523	1.1639	4.9404	6.7566	1.4405	5.2739	4.7665	6.289	6.4392	1.915	5.5134	2.9613	4.529
19032													
19033				0.799									
19034	20.2428	24.8183	8.5243	20.8185	12.8837	41.3994	34.5805	43.4483	25.4747	43.9042	23.9053	29.1577	64.1901
19035	7.3297	5.0299	4.1089	6.3831	7.5298	9.7275	5.265	6.8841	4.4312		7.5781	4.4102	4.3776
19036													
19037	3.4225	6.3539	2.8329	4.5777	3.9624	6.8245	4.5144	7.4897	6.3159	6.0762	8.9531	7.4305	5.9302
19038	1.1719	0.8261	1.2181	3.8359	1.6207	1.8383	3.4381	1.8315	3.2034	2.6258	3.023	2.3686	5.4481
19039	3.1334	2.8078	3.4601	3.4833	2.6833	1.5917	2.0941	2.2778	2.1289	2.1892	3.026	3.0973	
19040	1.2367	0.7082		0.7942	1.1011			1.4592				1.5621	
19041	2.2338	5.2873	2.3186	3.2028	3.9196	1.7177	1.8515	2.6375	2.7115	2.7282	2.3581	3.1079	3.3874
19042	1.3424	2.6724			1.638	1.4453		1.5737	2.3201	1.6999	2.2023		5.2663
19043								1.4333	1.2358				
19044		9.0916	4.259	7.5558	5.2975	4.741	9.7548	7.8239	9.9863	6.159	6.7795	5.1526	8.6413
19045	19.8155	29.8886	8.5765	26.3822	18.5926	7.4711	9.536	6.6266	17.9555	17.7554	12.2091	8.5207	23.0971
19046													
19047													
19048	3.4462	4.4181	3.291	3.5212	3.9265	6.0641	9.3858	7.4646	5.7577	5.0193	8.0375	6.3355	6.6769
19049	2.3348	1.4742	1.5511	3.2204	3.1267	3.027	4.0133	2.723	4.1379	3.5617	3.75	3.4149	7.6692
19050	1.101	1.5496	0.8599		1.3325	0.9814	1.8944	1.214	1.528				
19051	38.8438	56.6407	28.3522	43.3924	48.9844	35.1955	43.4068	65.0967	59.0959	33.7986	70.6429	59.2773	14.5289
19052	0.949	1.1179		0.836	1.4332	1.6013	2.3254	1.4207	1.6561		1.887	2.448	
19053				0.9835	1.4987		1.4384					1.3092	
19054													
19055													
19056													
19057													
19058	11.2654	12.2419	17.5306	11.2934	10.7297	12.3051	6.4703	12.6484	8.076	7.7722	7.0649	9.6948	15.5018
19059			0.7292	1.0284									
19060													
19061													
19062	8.7256	11.0208		3.203	4.4096	6.2371	2.302	2.6531	5.7855	7.6746	7.7509	4.6469	8.8293
19063		2.1123	1.8368	2.6738	1.8535	5.1074	6.4623	5.7717	3.6236	5.2609	5.3906	6.7201	4.4653
19064	1.1809			0.8534									
19065	84.0575	60.5355	102.6027	70.0785	65.5991	175.3519	133.4765	75.2492	136.9904	172.4197	122.7276	91.4728	233.5363
19066	4.8835	6.7315	4.5239	7.3223	5.3228	4.6241	2.479	3.1628	3.6188	3.878	2.6992	2.6199	7.1266
19067													
19068													
19069	4.4692	4.3585	7.9149	5.6308	6.8612	11.7945	12.798	8.8783	13.4217	6.8798	9.1659	10.4155	8.6502
19070	16.6204	17.3546	18.5086	20.4276	14.8313	97.2584	40.2199	40.8786	39.49	39.0199	34.5964	24.4289	54.0277
19071	1.1119	11.7437	2.3718	4.7536	3.691	11.0766	17.0596	8.0825	10.4924	7.3722	6.149	7.1166	22.6724
19072	7.0603	7.601	3.6694	4.586	5.2292	15.3841	11.0071	20.9116	14.3553	14.6351	12.7334	12.7415	15.7627
19073	86.9745	92.2432	85.2941	137.025	161.9591	220.9066	264.9961	173.4894	193.8011	307.8564	252.6454	196.6954	1031.4028
19074													
19075													
19076				1.2977				1.5481	1.1617				
19077	6.0259	3.9174	4.8641	5.3905	2.6986	3.9631	6.5929	3.9432	7.5553	5.5424	6.7495		8.1399
19078													
19079	18.7567	44.2833	57.0172	14.1025	51.9846	120.6281	45.6571	41.5062	61.5735	117.9894	78.4159	73.4905	62.9135
19080	3.4915	4.0733	3.9476	5.8474	4.3775	6.0998	3.4789	4.8892	3.8769	5.7137	3.1084	4.2409	6.397
19081						1.262							
19082	1.0973	1.2095	1.3877	1.4655	1.3113	1.4994		1.1829	1.669		1.9514	1.6036	
19083	1.0775	0.9296	1.2213	2.091	2.3937	1.918	2.8038	2.7986	5.72	3.7348	4.4745	2.8782	2.3127
19084	47.992	37.3807	40.2393	63.6965	53.0703	45.8475	84.7233	87.4968	49.2996	72.8671	45.0222	49.228	44.5454
19085	0.8087	1.427	1.3564		2.0701	2.0385	1.8085	1.0157				1.8584	
19086	7.9367	6.6655	4.4642	2.7291	5.0669	3.4986		4.201	4.5066	3.0906	3.8814	4.5353	6.4547
19087	10.9118	11.4681	7.5141	8.2484	13.7612	27.8206	9.7492	18.058	14.2066	8.4052	11.3707	12.1486	29.0199
19088							1.4189						
19090	7.9379	10.711	4.9167	12.3382	5.9829	16.1272	18.4347	16.6804	18.4639	26.5354	14.1844	13.4825	44.5424
19091		2.7847	2.6528	1.2763		8.6971	4.5084	1.0665	11.1008			4.1254	
19092	2.0519	1.403	2.0689	2.2694	1.5477	5.8671	1.7154	2.3025	1.9811		1.9478	2.2921	
19093	2.118	1.1913	1.3966	1.843	2.1132	3.3286	2.7604	3.4892	2.5231		3.6013	2.3355	2.8217
19094													
19095													
19096													
19097													
19098	2.8771	3.7851	2.3391	4.3707	3.3779		2.6799		3.9162	2.6214	2.9958	2.7469	3.9202
19099													
19100	3.9974	22.2452	2.4895	4.2606	10.9115	33.7986	16.7741	3.5333	25.1795	22.7227	28.9417	18.6837	69.4217
19101													
19102	1.4948	1.4595	2.0082	2.462	2.2445	2.0329	3.1382	2.1707	2.0587		2.3361	2.7245	
19103													
19104				1.2078		1.4441	1.4012	1.036	1.6096			1.4865	
19105	9.2993		4.3365	5.4301		3.8378	9.4114	17.9149	3.011		1.6587	3.5618	
19106													
19107		2.3935	1.2476	2.4641	2.2459	1.4123	3.2045	4.1227	1.407			2.2038	
19108		4.6539	6.3516	9.2573	8.3272	12.168	12.5328	12.0506	12.029	5.6639	8.4058	7.1679	13.0485
19109	1.3441	1.5642	0.7452		1.2635		1.7757						
19110	0.7359	0.8683	1.184	0.9979	1.2213	1.2721	1.7848	1.4483					2.218
19111	10.7422	14.6975	10.7134	24.0924	18.1909	26.6292	19.2364	14.2245	22.1122	17.2903	17.7184	20.9385	23.5654
19112	2.5659	3.3169	4.557	2.9197	3.6102	4.5164	2.7054	4.0535	3.0384		2.3137	2.9087	9.5281
20001	1.2231	1.2981	0.9348	1.1868	1.4666	2.0136	2.4063	1.5054	2.9465	2.0824	1.6606	2.7251	3.2902
20002		1.215	1.0362	0.9311					1.3081				
20003													
20004													
20005													
20006				0.8542	1.2654	1.4798	3.0775	1.3062	2.5445	1.9422	2.7983		
20007	0.9553	0.9358	0.7476	1.1536	1.3545				1.3576				
20008	4.6216	7.1123	8.1591	7.6658	7.4895	14.2462	14.3934	14.6006	11.686	14.611	13.1981	10.7536	13.6638
20009		0.8293	0.8026	1.3046			1.4524	1.124	1.3862				
20011													
20012													
20013													
20014													
20015	2.5269	1.7386	1.1267	2.2551	3.0697	1.4434		2.8067		4.9274	5.5393	3.6229	2.0484
20016	8.1165	0.8362											2.518
20017	1.4665	1.4797	1.0053	1.0144	1.5819								
20018													
20019													
20020													
20021		0.9595		0.7109		1.4467	1.2886		1.3929				
20022	0.8615	5.6825	0.74	1.9156	3.1607	5.0924	4.1971	9.0366	8.4729	4.7962	7.9517	5.1675	9.6935
20024													
20025													
20026		0.8298	0.7281	0.9195		1.3841		1.4517	1.3989		1.6806	1.4118	
20027	1.485	1.645	1.0301	1.2231	1.7287	1.8495	2.2772	2.1717	2.2492		3.6572	2.0307	
20028	1.5853	1.3683	1.0762	1.8784			1.6596				2.2294	1.4935	
20029				5.8493									4.9073
20030	1.6629	1.3258	1.3512	1.288	1.9921	2.4208		2.5852	2.0739	2.2014	2.9942	2.4812	3.1358
20031		0.782			1.7202								
20032													
20033													
20034	1.1007			0.7689									
20035		0.7453	0.8581	0.7614	1.0687								
20036	1.4318	1.4968	1.1911	1.6211	1.6954	2.5035	2.6779	2.2574	2.7627	2.4623	3.0917	2.0701	2.7493
20037							1.4127						
20038													
20039													
20040	1.7852	3.0186	2.6418	5.3304	2.7908	2.8873	2.603	3.2368	2.3486	2.8878	3.1907	2.8234	2.3765
20041													
20042													
20043	2.0585	4.2515	0.8092		3.8821	5.478	2.8261	1.4621	2.2725	2.3199	3.3284	2.4451	4.2818
20044		1.3584	1.5388	3.1445	1.2968	2.0502	2.252	2.8701	2.1739		1.4653	2.0012	3.1763
20045		0.9659											
20047													
20048					0.9753								
20049	1.2339	1.447	1.2969	1.3242	1.7179	1.7668	1.1795	1.8124	1.8151			1.5398	2.0689
20050	3.8617	8.2153	4.2602	3.0519	6.4097	3.5684	4.769	5.6645	5.766	3.0614	3.2211	4.2263	3.0372
20051			0.8447			1.1979							
20052													
20053	39.0336	45.6422	39.3822	40.4905	41.3801	18.708	14.7364	25.1764	15.8106	17.1693	21.1578	29.4731	8.0967
20055									1.1415				
20056													
20057	1.1408		1.38	1.293				1.8009	1.5366			1.7078	1.9242
20058	7.8763		7.0041	4.9431	7.6937	4.8163	28.4083	31.8337	23.8634	15.0987	19.0663	9.7008	3.8336
20059													
20060													
20061													
20062			1.5251	0.8239					1.1771				
20063													
20064	0.9595	0.7926	0.9631	1.1789				1.4396					
20065						1.0301							
20066			1.0711	0.7856									
20067													
20068													
20069	0.9967		0.7839	1.3404	1.6523							1.5603	
20070	1.1498	1.2798	1.031	1.3086									
20071	3.0628	2.3098	4.0688	4.2797	2.6409	4.308	5.9461	7.2984	5.0747	5.254	4.3458	3.7858	10.7255
20072	4.5415	3.8675	6.6717	13.8444	6.6675	17.0659	31.1054	12.2585	10.9387	14.1441	16.876	8.8955	36.1427
20073	1.3996	1.5226	1.5117	1.8254	1.8581	2.1646	1.7665	1.4566	1.9168		2.0764	1.8599	
20074													
20075		2.6972		1.3829			1.9885	2.3524	2.3267		2.2078		
20076	0.8543		1.398		0.9902								
20077	1.4087	1.1559	1.4465	1.4681	1.5846	1.2502	2.1913	1.304	1.3769		1.8956	1.3427	
20078	1.041	1.366	0.8864		1.384			1.565					
20079	2.9187	5.9013	3.6876	5.8667		4.0596	9.0919	12.7899	4.6906	6.3811	5.3366	5.2732	5.0989
20080	2.9909		3.9289	3.7151	3.9568	3.4842	3.4273	3.3995	3.0946	2.3156	3.3664	3.1407	2.0014
20081													
20082				0.9572		1.1393		1.2803					
20083													1.7612
20084							1.2004	1.6309	1.4446	2.2195			2.9904
20085	4.4541	10.8125	3.3134	6.0951	7.9292	4.5281	3.8478	6.8947	4.2775	5.7628	5.1179	6.1699	12.0137
20086	3.3223	3.2492	3.0044	2.513	3.5275	1.6509	1.9325	2.8961	1.7071		1.7502	1.7785	
20087													
20089													
20090							1.1809		1.2029				
20091	2.8096	2.4886	2.1618	2.4523	3.0993	8.3423	4.8142	7.1838	4.7623	5.4339	5.5339	5.1636	11.2647
20092			0.7475										
20093	3.0899	3.8453	2.714	3.7348	3.0109	5.4891	3.0445	3.6269	3.275	4.0972	4.1586	3.3071	8.3331
20094													
20095													
20096													
20097	1.263	1.3984	2.0002	1.9936	2.2819	1.4986	2.3622	2.0474	2.3352		2.1716	2.5957	1.7366
20098													
20099													
20100	1.773	1.8461		2.9219	2.4983		2.4947	2.3751	2.0312				
20101													
20102	7.6284	7.0339	6.9352	8.9989	8.1929	5.9925	6.8138	5.7869		7.0944	5.7452	5.2529	6.3707
20103													
20104	3.9354	1.5288	10.7338	9.2579	17.2692	8.5895	36.8738	8.6896	18.9506	17.5349	18.025	13.6129	10.4868
20105			1.3445	1.4066									
20106	3.6471	5.9152	4.1782	5.1426	4.9764	4.9231	6.15	8.0191	6.6871	6.6878	5.5512	5.5203	16.3658
20107		2.2757	0.9345	1.0576	1.287	2.4557	1.521		1.9973		2.6472	1.4078	2.0503
20108		1.1656	0.8406	0.7684		2.4732	1.4964	1.8301			1.7821		
20109	1.6176	1.1654	1.8847	1.9724	2.8197	2.1502	2.9486	2.7557	2.8572		2.7281	3.3911	
20110						1.8944							
20111													
20112	6.4799	5.4755	6.9399	8.0188	8.8774	8.6776	19.8219	7.5469	11.8555	16.4935	7.5023	11.0588	
21001													
21002		7.9409				3.3346	1.5574		2.7062		3.431	1.9464	4.5531
21003						1.9724							
21004		3.6896	2.4338	3.886	3.8138	4.328	2.9352	3.6653	3.5915	4.2401	3.6577	4.6986	
21005	3.7463	1.8076	11.3269	8.7417	3.5488	36.0219	13.9458	12.822	5.7962	3.8052	5.1723	10.1587	12.51
21006	3.3228	3.4972	2.5943	3.4682	7.5856	5.8533	8.5536	15.0312	10.1108	7.6677	17.8335	12.7554	5.1058
21007	0.9095	1.2851	1.128	1.1543	1.1461	1.811		1.2506	1.6515	1.7268		1.9601	
21008													
21009	1.3202	1.7596	1.5968	1.8872	2.6294	1.9219	2.6533	2.2259	2.5487	2.5648		2.3	2.1754
21010													
21011	1.0269	1.3104		1.3947	2.056	1.9908	1.9139		2.0401	1.5972	2.2065	1.8086	
21012	0.9503							2.4653	1.1668		1.8695		
21013													
21014													
21015													
21016		1.2968	0.6899	0.9072									
21017													
21018													
21019	1.6675	1.8428	1.6533	2.0407	2.9782	2.7248	1.6526	2.7091	2.1317	1.9843	2.0955	2.2893	2.1175
21020													
21022		0.8273		0.9643		1.3092	1.7578					1.969	
21023													
21024	1.2595	1.6306	1.3712	1.1938	1.6548	2.0651	2.0255	1.8936	1.8981	2.3366			
21025		1.1056	1.0598	1.2914	1.3799	0.9922	1.4428	1.3882	1.7041	1.6339	1.5934	1.4813	
21026			0.6886	1.2839		1.289		1.3929			1.3235		
21027													
21028													
21029													
21030	7.7719	9.3689	9.2139	10.5421	9.958	13.823	16.4516	14.7767	12.967	12.3416	15.0857	13.7997	12.3812
21031	1.2108		3.4012	2.0451	5.7729	2.92	16.122	3.733	10.5305	7.4209	11.0481	6.5826	4.3276
21032													
21033	6.1605	9.6447	3.9647	4.7137	5.7357	6.5981	3.0162	5.6328	5.2945	5.7681	3.2219	3.7741	10.8802
21034		9.0579	0.922	0.9258	1.087		2.4647		1.8476		1.6533	1.7776	
21035	1.7723	0.8817	1.2735	2.1336	1.1944	1.2375	1.3296	1.6065	1.6588		2.3082	1.5606	1.7961
21036													
21037													
21038													
21039													
21040						1.1422		1.9352					
21041													
21042	3.7673	4.0078	3.3964	5.1023	5.2582	8.9257	9.4876	10.7649	8.3079	5.9417	5.5268	9.9727	3.9067
21044	0.8782	1.2787		0.862	1.5371	4.1507	4.0026	3.5586	3.3254	1.9601	3.8049	2.651	3.6318
21045		1.0642	1.1052							2.0959		1.7542	
21046	1.6657	2.7311	1.9572	1.2284	1.2225	2.3836	1.2534	2.7154		2.5481	1.7988		
21047	21.6746	25.1328	21.7599	33.3834	44.3383	36.8255	64.1404	86.852	55.7238	40.9088	45.747	47.9448	69.1124
21048	1.6114	6.1914		1.7459	1.2111		1.3619		1.3432			1.5086	
21049													
21050	0.6674												
21051	8.9626	14.7838	3.0022	7.7946	13.1578	8.5229	11.5971	7.9131	13.2163	12.03	13.9881	10.1793	10.9946
21053													
21054	8.8443	1.4889	14.2971	28.8373	14.1461	17.1127	13.11	11.0201	16.3083	6.2163	11.6	13.8194	17.7272
21055													
21056													
21057	1.2995	1.4058	1.1302	1.4583	1.5569	2.5375	2.0304	1.8539	2.0367	2.4267	2.3221	2.2181	1.7934
21058	0.943	0.9522			2.214		2.2625	3.1087	1.1519				
21059	1.2019		2.6182	2.1799	5.723	2.6071	13.8775	3.0146	11.3932	7.6216	12.0302	6.9452	2.726
21060		1.0869				1.8183	2.8473	1.6692	1.9596		2.2475		
21061						1.979							
21062													
21063	1.4408	1.81	2.0243	1.966	2.1404	2.9767	2.7448	2.9769	3.2337	2.5515	4.5986	3.6302	
21064	2.6625	3.0835	1.5778	3.3724	3.5592			1.732	1.1797		1.949	1.818	
21065	1.0067		2.52	1.8695	5.7922	2.2899	13.5769	2.5693	10.9516	6.8399	10.5458	6.1	1.6212
21066	0.8762												
21067	2.6313	1.8042	2.8117	3.9893	3.6692	2.5337	3.641	2.7219	2.0624	2.5967	3.6377	3.5984	
21068	1.7985	2.5494	0.8936	2.8062	1.8947	1.8961	2.2293	2.5262	1.1747	1.9295	3.7816		3.0513
21069													
21070													
21071													
21072													
21073													
21074	0.9665		0.7878			1.3739	1.7473	2.08	2.3739	4.3979	1.4989	3.1261	
21075	50.0337	30.412	35.9756	30.251	45.9413	118.9392	70.1716	53.125	86.1507	80.7658	128.7037	66.4517	84.0417
21076													
21077	1.6232	2.1098	1.9068	2.2298	2.1288	2.7696		3.3221	3.143		3.8137	2.4074	4.1072
21078													
21079													
21080													
21081											1.2852		
21082													
21083		1.0569											
21084						1.0903							
21085			1.3677	0.7547									
21086						0.9629							
21087													
21088	7.4507	7.0546	3.3112	3.9315	5.3941	8.9309	10.2601	12.0181	11.3544	7.1435	13.3198	11.9435	8.1271
21089	6.0991	6.0316	4.3151	8.7793	7.615	20.327	7.073	10.9149	7.1906	16.2003	8.3949	5.4441	4.8418
21090													
21091													
21092	2.0622		1.7519	1.7936	5.0571			1.8853	2.7588	4.0816		3.2098	
21093	1.1391		1.0738	0.9165	1.694		2.0036						1.7859
21094						1.2375	1.2894						
21095							1.3482						
21096													
21097													
21098	1.894	2.0342	2.2035	3.6605	3.2252	3.0134	2.461	3.5437	2.4541		2.101	1.7071	2.4677
21099	2.3173	2.7781	3.8235	3.8038	3.8677	4.5825	5.8091	5.126	4.4313	4.4739	5	5.0879	4.753
21100													
21101		1.1963						1.2872					
21102			0.8793										
21103		1.1797	1.2047	1.2185	1.3144		2.6957	1.7128	2.3975		1.7833	2.0856	
21104													
21105	1.0993	1.2648	1.0088	1.5493		1.3014			1.2533		1.7337	1.3897	
21106													
21107													
21108	1.0971	1.2758	1.6082	1.7998	1.7687	1.4917		2.3592	2.319			2.163	
21109			0.8599										
21110	3.3271	5.6017	1.4682	4.2766	5.7434	4.0483	1.7966	3.0969	3.4535	3.1873		2.0357	3.2323
21111		3.0835		1.1687									
21112	2.5388	2.0752	2.4167	3.1591	3.4136	1.1281	1.5416	1.7977	2.1511		1.7126	2.6117	
22001	1.6792	1.8952	4.5502	3.956		6.8332	3.6428	5.6043	5.803	3.2261	5.6775	4.0161	6.2614
22002	7.3521	13.013	5.9459	10.9906	8.1035	32.867	10.7911	25.4694	18.2427	15.9849	15.7658	12.6877	125.6198
22003													
22004													
22005													
22006													
22007													
22008	2.6209	3.875	2.4433	3.5697	3.5298	3.1084	3.4548	2.7405	3.6688	3.3712	3.4342	4.0148	1.8527
22010	4.7101	5.9458	5.3043	7.4026	8.4335	7.3771	6.4412	6.9712	5.9605	4.9053	7.3134	7.923	3.9892
22011													
22012													
22013													
22014													
22015					1.0462								
22016	5.5581	4.4237	4.8433	6.6812	3.9209	3.8473	4.1001	2.9029	4.864	4.038	3.0866	4.2978	5.3725
22017													
22018	1.6882	2.2119	1.0702	2.4748	1.6434	1.7499	2.5808	2.6203	2.7226	3.5776	2.2106	2.1051	3.3932
22019													
22020													
22021													
22022									1.2234				
22024						1.5787							
22025													
22026	0.7472		1.1736	0.9163	1.2899	1.4553	1.7773	1.3946	1.4367	1.5728		1.9799	
22027	1.9296	2.4899	2.7191	3.7087	2.9245	4.5682	5.5925	4.5201	4.7329	3.5399	4.5767	4.3894	2.9378
22028													
22029	5.7299	7.2247	2.527	2.4861	1.7331	8.4714	2.3981	8.3019	4.4593	4.318		3.3839	7.5089
22030	4.148	4.0686	7.4615	16.367	5.3697	19.757	22.3316	19.5173	25.3903	3.4703	8.1897	13.8397	10.7025
22031	2.2805	2.3965	2.677	2.8587	3.2972	4.1065	3.8033	3.8312	3.2157	3.4582	3.9624	4.3206	2.3407
22032													
22033	1.7189	1.9581	1.6612	2.5306	2.4797	1.6961	1.6735	1.8062	2.0717	1.6279	2.4139	2.075	2.3532
22034	0.8158			1.5567	2.491	1.5726	1.5532	2.9244	1.6203	1.8217	1.714	2.9302	
22035	2.2335	3.4756	1.592	1.6696	2.599	2.2906	2.5235	3.0863	2.1767	2.964	3.5459	2.0568	5.0274
22036	0.8049					1.0116							
22038			0.6691										
22039			0.7611	0.9842	1.197	1.3634	1.5758	1.5064	1.5973				
22040		1.8215	1.3391		1.867	4.6568	2.6431	7.0603	2.4276	4.6736	4.6042	3.3976	
22041						2.8968	2.743	18.9705	1.9958	1.945			
22042	1.7431	1.4764	2.0011	2.3806	2.1758	4.8731	4.697	3.8641	4.35	4.0052	4.2135	3.8665	2.7366
22043								1.5208					
22044	6.7778	13.9676	3.5194	7.1466	5.845	4.9138	4.1855		3.7336	3.1708	3.4375	3.3475	10.9277
22045							1.2151						
22046													
22047													
22048							3.2313		2.0966		2.1315		
22049													
22050	1.8867	3.1345	1.2955	2.3916	2.425	1.7427	2.4879	2.0083	2.5341	1.9228	1.7116	2.1234	2.6844
22051		0.7439	1.5013	3.2047	1.348	5.8356	3.9739	2.2559	3.6218		2.1875	2.503	
22052	5.5468	7.8262	7.1506	7.6493	10.093	11.914	16.3801	13.2109	14.089	11.5948	15.278	17.8843	6.1686
22053													
22054													
22055	4.4142	4.6535	3.667	4.1387	5.1477	4.7134	7.3526	5.6758	6.3263	5.6032	6.5704	6.8773	3.5213
22056	1.3701	1.6357	1.7179	0.8751	1.942	3.0817	3.3211	2.1156	1.1139		3.5097	1.7195	
22057	1.2631	0.9281	1.2021	1.6897	2.5616	2.5489	2.6579	2.5913	3.9394		2.3107	2.9455	
22058			12.5074	3.9364		4.5571		1.1025	2.9223	2.1358	2.6042		
22059													
22060													
22061	1.7816	1.7354	1.583	1.9235	3.2851	2.0109	3.5876	3.2847	3.2155	2.7455	3.0191		2.197
22062	2.6689	21.4803								6.8402			
22063													
22064	5.9778	9.1004	5.6768	9.6314	6.5728	15.3528	25.0712	17.3574	20.6884	15.9842	24.9595	12.8554	28.174
22065	4.1727	5.1118	4.1964	5.6031	6.3472	9.5814	13.8978	12.1162	9.8002	10.1998	9.7679	10.3186	4.6555
22066													
22067													
22068													
22069													
22070													
22071				0.8244		1.0486		1.2202					2.42
22072	1.8821	1.8147	1.8745	2.1986	2.3309	3.1567	3.0455	2.3723	3.1855	2.0329	2.6808	2.8025	2.2292
22073													
22074	1.1218	1.7743	1.1301	1.1158	1.4867	1.3216	1.4021	1.9536	1.143	2.3399	1.8183	2.4468	
22075	0.8169	0.8895				1.0451			1.0623		1.7031		
22076													
22078	1.7414	1.1559	2.128	3.1537		4.7952	3.3848	3.2194	2.6976	2.6725	3.114	3.7257	2.73
22079	20.5323	17.4718	13.8976	29.1157	20.6949	30.0163	23.986	34.6245	27.6196	28.1884	29.5962	23.6381	53.5312
22080	1.6714	1.1637	1.7042	1.18	2.4243				1.3584				
22081													
22082													
22083			1.0197	0.8457		1.3631	1.3438				1.3417	1.3032	
22084													
22085													
22086	35.0185	44.5907	43.3452	49.7144	49.6187	97.9651	81.3378	95.4248	85.3958	80.2224	88.3192	93.3864	147.5081
22087													
22088	6.0516	2.3271	19.0152	14.6614	22.0009	4.7909	19.9079	5.7752	8.19	7.6899	9.401	6.4835	8.522
22089													
22090													
22091													
22092			1.4932	1.6432									
22093	20.1985	19.9593	17.7991	17.4871	17.783	57.4671	33.5595	32.6981	36.8038	40.2228	42.8738	27.4539	292.1762
22094						1.0932			1.4995	2.4002			
22095													
22096													
22097													
22098		1.4207											
22099	40.4969	34.6	56.281	69.5992	52.7757	84.2687	82.986	74.5832	73.6199	54.8079	51.1544	43.0824	169.7242
22100				2.2378	1.0586	4.4291	1.8437	1.0784	2.1245	7.3305	2.0246	1.2662	
22101													
22102	3.8691	3.8348	4.949	5.5365	4.2865		1.2756	1.8262	1.5328		3.689	4.9016	
22103													
22104	1.2866	2.2588	1.769	2.0303	2.5151		4.5054	4.8843	2.51		1.6019	3.1756	
22105													
22106													
22107													
22108	1.7804	1.227	0.8986	1.2224	1.4183			1.3506	1.6505		1.4844		2.4197
22109		2.4505	1.0871	1.4934	4.7184	5.1179	4.4731	3.494		6.1441		3.8258	3.1568
22110													
22111													
22112								1.8035					
23001				0.7128									
23002													
23003	0.891	1.0782	0.9831	1.4789	1.1619	2.2308	1.6515	1.3362	2.3664	1.5526	1.9358	1.7759	
23004													
23005	1.4445	1.6756	1.6264	2.4918	2.6403	2.531	2.7496	2.2873	3.2329	2.1102	2.4219	2.9956	2.1216
23006	15.4846	16.4823	11.664	14.0904	14.6498	3.4407	3.084	6.0326	4.2345	6.1142	7.4263	10.0112	3.3095
23007		3.0164											
23008													
23009	8.9644	7.9113	10.0447	13.938	13.3218	25.7386	27.3398	21.414	20.4297	17.8403	22.9269	28.5639	18.4535
23010	3.333	3.2704	1.7282	2.5701	4.3448	14.097	10.3566	15.4585	15.6281	11.0637	13.8651	16.1233	20.5539
23011	1.9969	2.1789	1.5648	1.5322	2.0576	1.3114	1.8779	1.4151	3.0628	2.371	3.1909	2.6596	2.5811
23012													
23013													
23014	3.0713	3.2565	3.9221	5.2181	4.6655	1.9138	3.7978	3.9907	3.96	2.7003	3.6178	3.7796	4.4136
23015		1.5943	1.1904	1.6886	1.9996	1.8467	1.9557	2.6246	2.1814	2.0431	2.6499	2.6519	
23016													
23017													
23018		0.9323											
23019	5.5094	1.0709	1.6638	2.0361	1.6087	1.6713	2.5056		1.9626	1.6417	4.9045	2.9139	3.3151
23020		0.6927	0.8519	1.2014		1.7028	1.9823	1.7291	1.9819	1.6877	2.1294	1.9107	
23021	5.1773	7.1174	5.2521	7.2162	7.3366	12.8587	13.7118	12.6187	10.1667	9.1303	9.7461	10.7509	7.4723
23022													
23023													
23024						1.1793							
23025	5.6654	5.9763	6.4769	5.9733	9.8562	12.0234	11.4054	9.111	9.022	7.6177	9.1211	11.5245	3.682
23026													
23027													
23028													
23029													
23030													
23031	1.7288	4.7222	3.0992	5.679	5.179		1.8145	2.7903			4.4202	3.7624	
23032													
23033													
23034	2.0641	1.7697	1.4579	1.4735	1.1791						1.6374		
23035	1.0714	1.0221		0.9199	1.044								
23036			0.768										
23037	3.659	4.6706	5.064	7.1981	4.9265				1.1603	1.6835			
23038													
23039	2.4741	2.5934	2.5984	2.9564	3.1132	3.9795	5.3044	4.1148	3.8518	3.7467	4.5313	5.325	2.3016
23040													
23041		1.0773	1.0222	1.3662	1.1317								
23042		0.868			1.325								
23043													
23044		1.0218	0.6889	0.7799		1.601		1.8546					
23045													
23046													
23047													
23048													
23050	3.2676	2.0215	0.8246		2.07	1.6269		1.3863	1.8155	1.9064	3.4362	2.0158	
23051	20.9822	24.1739	23.2601	24.7722	33.4035	25.3662	38.5898	26.6048	30.1852	31.4967		32.1766	7.9981
23052													
23053	1.2182	0.7692	0.7859			1.7956							
23054	3.853	3.2887	2.3145	2.6868	3.986	3.5672	3.5406	7.1625	3.5661	5.776	4.2127	3.8891	4.9409
23056	1.6459	1.1953	2.9024	2.3696	4.7569	2.9197	9.1516		9.1657	6.4758	7.1325	5.0408	
23057		0.9524	0.7124	0.9249				1.8258					1.5822
23058		1.0118		0.7763									
23059			0.7241										
23060													
23061		1.3718	1.1142	1.35	1.259	1.2968	2.8515	1.6862	1.6928		2.2311	1.9201	
23062	2.7539	2.155	8.5378	3.1506	4.6258	5.5041	6.2636	5.0472	4.6313	8.8609	5.4688	7.8768	4.0138
23063	2.4238	2.1005	1.9844	2.2269	2.356	1.6059		1.6177	1.831			2.0803	
23064													
23065													
23066													
23067		1.4177	0.8418	1.2526			2.2172		1.954			1.4354	
23068	1.4105	1.1638	1.658	2.1299	1.9261	3.0127	3.7008	2.2762	2.9125	2.076	2.1953	3.0471	2.0325
23069	0.9943	1.2952	1.3945	1.7468				1.3411				2.173	
23070		1.0753											
23071													
23072													
23073	1.3923	1.5533	2.7573	2.9304	1.981								
23074	1.3283	1.5849	1.3898	1.7974	1.9437	2.4196	4.0932	2.3662	3.3837	3.3083	3.0013	3.0258	
23075													
23076													
23077													
23078	3.8534	3.5299	5.3406	6.0109	5.0198	8.4068	17.3457	7.1104	8.1579	8.1928	9.0104	10.6739	5.5383
23079													
23080	62.6794	71.748	70.5941	75.3186	79.2198	43.3212	43.0265	69.2776	40.6078	43.6628	60.1296	67.0768	23.3143
23081	2.2174	4.1091	3.618	2.8731	3.1721	1.6145	1.9525	2.3515	3.2576	4.8271	3.4613	2.631	2.9296
23082	50.1051	38.1523	85.8913	105.0829	80.4721	90.7392	197.1933	128.6412	151.8573	94.1814	175.821	119.8723	137.2029
23083	2.3698	2.9879	3.0721	3.2232	3.522	3.8636	4.8235	4.3358	3.5336	3.9118	4.6202	3.7104	2.385
23084	0.7666			0.7976									
23085													
23086													
23087													
23088													
23089													
23090	1.5299	1.7494	2.8417	2.3538	3.597	3.9301	6.3484	5.0001	4.6533	4.1498	5.0708	4.1515	2.5539
23091										1.7803			
23092	6.948	5.6217	6.3589	10.3719	10.3178	9.4047	18.8015	10.3111	12.8451	12.3093	14.8487	13.3544	9.2868
23093	1.4849	1.9126	1.9971	1.9038	1.7018	1.152	1.7713		1.7994		1.7309	1.6455	
23094													
23095													
23096													
23097						1.7332	1.2805	5.0293	2.2089		1.748	1.5091	2.8289
23098	1.3725	1.2936	1.5562	2.0108	2.2085	2.1075	2.7586	2.1406	2.3801		2.7415	2.5822	
23099								1.083				1.7852	
23100	5.4258	1.3438	9.4223	6.6558	7.0724	15.9489	19.7701	15.6353	30.4811	5.0764	27.3161	14.3425	17.1852
23101						1.364							
23102													
23103		0.9754	0.9326	0.9715	2.5094	1.0759	1.653		1.7708				
23104		0.7032											
23105						1.1029							
23106	3.4722	6.9628		6.5421	5.2151	6.351	1.466	7.7172	1.828	5.4983	2.9351	4.1609	
23107		1.5114	0.8892	1.0682	1.4838	1.948	2.3173	2.0419	1.5397		1.5434		7.5643
23108													
23109	1.7493	2.4587	2.7672	1.7777	1.9645	2.2243	1.5471	1.3905	1.5246			1.6229	2.6665
23110	5.5482	8.3315	1.018		7.6403		1.4311	13.3107	6.6956	3.4362			5.4589
23111													
23112			0.7629										
24001													
24002	1.6799	1.496	1.4717	0.87	1.0877						1.4311		
24003	4.6637	5.6086	7.4188	6.1563	9.5998	6.8233	10.6243	5.9807	4.9679	5.7845	5.5492	10.2075	3.6979
24004													
24005				0.8881		1.0616							
24006				1.0211									
24007													
24008													
24009						1.2637		1.1278					
24010													
24011													
24012		4.1024	4.3445	5.8985	3.9745	2.4563	2.3957	2.0975	2.0254	2.015	1.9658	2.2489	5.5141
24013		0.7735											
24014	1.309	1.5382	1.3139	1.5647	1.6158	1.375	1.4897	2.2073	1.7363	1.6775			1.6366
24015	0.9453		0.7704	0.7878		1.2418			1.395	1.6675		1.9102	
24016	1.6242	1.4597	1.3604	1.4608	2.2344	1.5958	1.9348	1.8947	1.9037	2.2537	2.0744	1.9512	
24017								1.4601					
24018													
24019	3.1302	6.3906	2.4616	3.4782	7.2434	3.3303	3.1218	9.685	3.0107	2.7854	5.4688	4.0458	2.9024
24020													
24021	49.3345	62.3367	49.2808	53.8566	67.8551	34.2768	24.9728	45.9161	32.7657	39.7883	45.016	59.1563	15.4647
24022													
24023													
24024	0.8498	1.2746	0.9413	0.9823	1.2576				2.347	1.8574	2.6118	3.1112	
24025													
24026	3.5791	5.3973	3.8151	7.058	6.3531	8.1274	10.3051	12.0688	8.6873	7.4638	8.4824	7.2237	
24027	3.1446	3.6483	2.3466	4.6169	5.2879	2.8081	5.3691	4.9169	4.2695	3.5965	4.8079	8.0611	3.919
24028													
24029													
24030		0.9569		0.9147									
24031											1.9478		
24032													
24033													
24034	6.4287	9.8087	7.4892	8.5943	9.6585	8.3874	12.1918	10.5879	9.4656	9.0629	11.2973	9.7689	4.5366
24035	0.8537	0.9118	0.8448			1.2415		1.5294					
24037										1.5225			
24038									2.0333				
24039	3.2644	4.4904	4.7258	4.8614	5.783	8.0228	9.1612	8.4852	7.0716	4.8736	8.8765	7.674	4.68
24040	3.445	5.96	1.5012	3.3456	3.9419	7.5949	3.6685	9.1565	5.4376	6.4753	4.7024	4.298	6.1725
24041													
24043													
24044						1.4296	1.5179		1.5509				
24045													
24046													
24047	3.3146	5.799	1.9317	2.6552	3.6772	3.1069	4.1019	3.9276	3.7721	2.2793	3.9032	3.1316	1.9914
24048	1.0553	0.7511	1.1659	1.482		2.0513	2.2172	2.2593	1.8642			1.7062	2.7447
24050													
24051													
24052													
24053													
24054	8.9384	10.1404	9.0362	11.4093	13.3316	14.2052	16.4736	13.6817	13.9918	11.5303	14.4696	11.3816	7.3254
24055													
24056													
24057	4.2401	2.6339	4.6886	2.6894	3.2729			1.4058	2.193	1.4347			
24059	5.708	6.0622	7.0531	7.5207	6.9222	9.2861	12.3667	10.4442	8.8354	10.2891	10.8208	11.6891	7.6677
24061	1.4304	3.35	2.3082	1.5074		2.9044	2.73	6.7019	2.6973	2.4751	2.5156	2.1775	24.1209
24062													
24063	2.0657	3.6711		1.7091	2.3199			2.0772	1.3256		1.3898		
24064													
24065													
24066													
24067	5.2801	7.2578	7.2775	7.581	9.974	9.5787	11.8023	9.2356	9.4709	8.4106	10.8808	9.7264	5.4721
24068	5.3102	4.4207	3.6134	6.8135	3.6914	16.8541	8.9953	12.761	8.145	8.8925	9.8203	9.0169	9.2735
24069								1.5547					
24070	445.0442	484.5769	423.3887	451.8418	533.4654	288.1489	260.9599	367.3644	324.1436	321.4752	443.735	456.5159	123.2683
24072													
24073	8.4702	8.1683	9.0933	9.8701	11.3845	11.6734	18.5117	12.5666	13.9405	10.8535	13.6125	13.4559	7.149
24074	0.8761	1.2806	0.9476	1.2024	1.2613			2.6795	2.3104	3.1602	2.2874		
24075	1.602	2.7326	1.1829	2.4748	1.7861	1.9686	1.442	1.7673	2.8833		2.111	1.5884	3.0399
24076	4.9702	3.9687	3.9431	5.0517	5.0419	7.7242	8.1639	14.7935	9.647	8.1709	8.2198	6.7834	8.9659
24077													
24078	0.9922	0.913	0.9958	1.019	1.3372	1.7688	2.5949	2.425	2.2191	2.6424	3.2695	3.6229	
24079	1.2134									1.5924	2.0313	2.328	2.1528
24080	13.1045	16.8699	18.7412	22.469	23.1066	35.316	42.6546	41.9602	29.976	25.5117	29.832	32.173	18.611
24081													
24082	5.7259	8.031	8.7974	11.8909	8.1716	4.9063	5.653	9.562	5.4134	4.8895	7.9922	4.5931	7.4625
24083	2.3358	2.2845	2.1302	3.7727	2.9261	4.1616	3.7412	6.4039	4.6493	3.0509	4.0356	3.4571	5.7836
24084													
24085	2.992	4.3628	5.0703	5.9937	5.3358	10.3327	3.6223	4.9417	3.2026	3.9219	4.1753	4.2246	6.9389
24086													
24087	1.3332	1.5309	1.8863	1.9635	2.1646	2.2614	2.4511	2.512	2.1148		2.7035	2.2654	1.8617
24088													
24089	10.4182	7.2948	17.5456	11.5837	5.8808	9.4412	7.3825	7.3463	6.4063	5.8701	5.6533	6.812	20.7219
24090	8.6423	6.3602	4.0094	6.9764	8.5602	5.7466	7.1111	6.0678	9.0075	9.8759	9.8688	4.8637	20.4512
24091													
24092													
24093	2.0411		2.2973			3.4942		1.5139					5.6333
24094													
24095	1.0469	1.7812	1.2914	1.7996	1.5134	1.6554	2.5665	2.6316	1.9341		2.5122	2.1402	
24096	1.2079	0.9339	1.2855	1.2987		1.7711	2.2303	1.4177	4.7515				8.5317
24097			1.3412	2.4699	1.376	1.6633		2.1335					2.0627
24098													
24099				0.6562									
24100													
24101													
24102													
24103	3.1848	4.6228	2.7315	3.7928	3.3338				1.5517				
24104			1.0247	0.952									
24105													
24106													
24107													
24108													
24109					1.1208								
24110	2.5753	2.6944	2.9429	4.39	3.8649	3.4933	3.3981	3.5259	2.7655	2.9717	3.4255	3.2331	3.2917
24111													
24112	2.0125	1.5189	3.1476	3.1546	2.5911			1.5067			1.8213	2.6362	
25001													
25002	2.5738	3.7131	3.1538	4.7981	4.8428	5.4183	7.0671	6.5613	6.6493	6.173	6.6419	6.3112	5.0915
25003													
25004													
25005	2.304	3.1484		3.4465	3.0547	1.8678		2.4921	3.1758	3.1158	1.8012	2.2207	4.4128
25006	34.4412	60.0766	25.1436	42.2886	53.2	106.8146	107.2221	134.265	119.77	136.1944	127.932	125.1541	190.7603
25007								1.2944					
25008	1.2498	1.3058	1.0704	1.6521	2.0769	2.74	2.06	1.5623	1.9807	2.4509	2.0608	2.5383	
25009	1.5877	2.2054	0.931		1.826	2.8023	1.4457	1.7794	1.8984	2.2062	2.4633	1.8907	3.2027
25010	3.3763	5.4054	2.9859	3.4099	2.811	2.4114	2.4141	3.2363	2.6211	2.9664	4.2088	4.9238	14.3908
25011													
25012	4.7645	6.0335	4.2354	9.2969		18.3785	6.4445	17.107	8.5895	16.1194	6.552	6.6951	
25013	1.9191	3.8247	1.3502	2.0853	1.7389	2.0808	1.4488	3.226	2.2492		1.8037	2.0557	
25014	3.4042	2.4362	3.7618	3.9927	3.4221	11.0559	3.9904	4.0193	3.99	3.8428	4.232	4.6355	6.1589
25015													
25016	1.4225	1.5815	2.3068	2.2879	2.3881	2.4633	3.1204	2.4208	2.7098	1.8314	2.1875	2.8543	
25017													
25018	2.2697	3.5887	1.6692	2.8886	2.9148		2.7068	4.5889	3.2598	3.5192	2.0313	1.9419	2.6771
25019	2.4558	2.8427	3.2946	3.822	3.9737	4.2734	4.9825	3.8781	4.3571	3.7471	3.9898	4.2841	2.6216
25020	1.9095	1.6484	1.5831	2.3269	1.7457	2.4475	2.9172	1.7548	2.4026	2.1174	2.3222	2.2702	
25021		0.7798				1.0227	1.2993	1.1351					2.0276
25022													
25023	2.6159	2.4428	1.5534	2.0378	3.9024	3.8716	5.6066	6.1921	7.071	7.2021	4.7476	6.1747	4.1156
25024	2.0608	4.383	2.5459	2.5404	2.9941		1.7212	1.2046	1.8391	2.2859	1.4517	1.8853	
25025				0.8677		1.8022		2.3807	1.5416				
25026		1.304	2.1552	1.8224	2.0542	1.4222	1.603	2.3246	2.2128	2.6143	2.4385	2.0561	
25027			0.7361			1.452							
25028													
25029													
25030													
25031											1.5565		
25032	1.2662	2.0286		0.8383	1.3616								
25033			1.367	1.2365	2.1132		2.0191	1.522	1.9201		1.4958		
25034													
25035	6.8786	3.6509	3.6956	7.3287	4.2878	3.4892	4.3226	4.8961	5.1315	4.8545	5.337	5.2743	13.5904
25036	9.0558	10.3476	7.8595	9.0437	9.015	3.9101	3.1932	7.3474	3.9534	4.557	5.5854	7.255	2.0763
25037		0.7774	1.5301	0.8584	1.3468		2.8531	1.5058	2.3768		1.8359	1.5176	
25038	1.2134	1.7715	1.1229	1.6023	1.5377	1.7339	1.47	1.622	1.7851	1.5472		1.5751	
25039	1.2943	1.5052	1.3898	1.6683	2.1517	1.3309	2.7168	2.9111	2.0771	2.049	2.7037	2.2724	3.3904
25040						2.1917							3.5004
25041	12.0536	11.1859	6.7677	9.8135	9.491	22.6179	19.5417	19.1239	19.2977	15.8775	18.6433	13.9523	20.5485
25042	1.9795	3.1112	1.261	1.7338	1.3255	2.0078		1.7481	2.7233	3.4639	2.761	1.4274	2.9112
25043	1.6761	1.7169	1.7691	2.0496	2.4814	2.8903	3.6262	3.6723	2.6234	2.0302	3.0086	2.8566	2.4138
25044													
25045		1.4576	1.0479	1.3108		1.8416	3.3927	2.022	3.1055	2.5407	3.4426	2.4408	
25046													2.5142
25047	8.5277	9.8338	5.8614	8.3941	6.3945	15.8414	16.3055	12.4793	16.9388	12.2964	11.7492	9.885	22.5416
25048	8.0345	4.9455	4.0011	5.7315	5.1684	12.0299	11.7463	11.0465	13.4719	12.2601	7.788	10.745	6.171
25049	27.5524	38.891	27.4477	23.2459	34.7196	96.3869	54.7279	75.7038	56.8282	45.2756	58.9332	41.4029	76.4279
25050													
25051													
25052		0.9786											
25053	1.8777	7.9079		4.892	1.5543	1.4852	3.9879	5.0349	5.9825	5.306	2.2746	8.8119	10.2291
25054		6.9617	0.7669	0.9295	1.2716	1.7471	1.4159	1.559	1.7597		2.443	1.466	1.7629
25055	3.1289	1.8348	2.7848	3.2149	2.4302	2.8101	2.8636	5.0974	2.0309	3.1627	3.5962	2.9864	
25056													
25057				0.7958		1.251	1.743	1.4776	1.1553				
25058													
25059													
25060	1.0385	1.3716	1.2815										
25061	9.0968	9.6234	7.235	9.9011	10.44	15.6093	18.9581	28.9274	22.0102	13.8653	17.5118	17.3544	27.8518
25062	1.1352	1.5022	1.3361	1.6137	2.0015		1.6481	2.6841	1.4961		2.4761	2.1686	1.8756
25063													
25064													
25065	1.9265	1.5679	3.0257	2.9127	4.16	3.382	5.5658	4.4441	3.5253	2.5509	3.263	3.7641	2.6149
25066													
25067		3.1487	1.7211	11.4751		9.3987	10.6351	5.6607	3.8617	1.8791	1.6554		19.4015
25068	4.4838	4.2221	2.3938	6.2521	3.8876	6.6014	10.9894	6.3341	10.581	9.043	8.7768		18.0722
25069		1.93			1.2436	1.1523		1.3294		2.2179			2.5064
25070													
25071													
25072													
25073													
25074	15.109	25.2754	4.0586	5.9513	12.0845	3.2692	2.1677	3.6821	3.3067	2.7616	2.2908	2.8472	17.085
25075	5.2299	4.333	6.6687	6.2629	4.5447	5.8883	9.2948	8.7873	9.6738	7.6224	7.0901	7.0495	8.6064
25076									1.2844				
25077	21.8576	13.0362	11.8705	17.2923	16.3622	6.2571	19.0616	20.0155	17.2321	15.2197	13.3734	31.9921	4.2316
25078													
25079	1.1596	1.5957	1.2411	2.2291	1.0992								
25080													
25081	2.5634	1.4203	4.7057	2.3564	3.4469	4.0062	8.187	3.5463	4.7164	6.3383	8.1802	6.957	2.6114
25082	13.0095	10.4254	5.0353	6.9043	11.7446	4.7302	12.6393	13.9647	10.854	10.8111	9.0747	10.087	7.1877
25083	2.7599	5.7131	2.267	1.5929	5.6442	4.5678	10.1446	9.3342	9.8689	18.6367	15.9652	7.7204	2.1026
25084	7.2301	4.5225	12.0951	8.5425	5.6553	17.39	12.565	10.76	9.9441	10.6248	10.2333	10.2185	16.0199
25085													
25086													
25087													
25088	1.7358	7.338	1.0869	2.9094	1.9611	1.8507	1.9434	1.9651	2.488		2.1289	2.2293	
25089	5.5669	11.0658	3.2273	5.5256	5.0911	8.0211	17.5646	12.5352	8.0903	14.709	10.0375	8.5114	9.1431
25090				0.7129		1.0213							
25091	3.3968	5.6407	5.1245	5.8289	6.3019	11.5343	12.5179	13.7223	11.4867	8.5625	12.2161	9.9954	20.703
25092	1.1286	1.2465	1.2364	1.904	2.3679	2.6549	3.2609	2.4643	2.4126	3.2017	2.8359	3.2276	
25093													
25094													
25095	2.118	1.7609	2.8161	3.1674	3.4917	4.0715	5.1116	4.4744	5.7396	3.4023	4.7575	5.2234	7.886
25096	2.1249	2.1906	2.9212	2.1928	2.9623	5.3908	2.5827	2.6179	2.2837		2.3397	3.2021	10.9823
25097	2.2329	3.2444	2.5995	3.648	4.3623			1.2919	1.8365		2.1726	2.0574	
25098		1.3204											
25100													
25101													
25102		1.8108	2.0694	1.1528		1.9477							2.2351
25103	4.6485	3.1063	9.1877	6.8205	13.0205	5.9451	21.7905	7.6668	13.1718	12.4168	12.0198	8.7479	8.0016
25104	1.0235	1.4481											
25105	1.0379		0.7273	1.1162		1.2781		1.8357					
25106													
25107	38.9114	37.7753	42.0571	35.1294	45.2674	8.415	6.7586	12.4046	7.5061	11.0908	9.7054	14.8368	5.4377
25108													
25109	4.0926	8.6733	4.2825	6.8247	7.3631	10.3902	9.1241	12.4983	9.1781	8.3839	5.9587	7.987	8.2441
25110	4.0306	2.2064	4.5965	4.2564	4.6697	4.1338	4.5313	3.6056	3.0667	3.2172	3.2486	2.6973	3.9643
25111	1.9987	10.058	2.1705	3.1689	4.7784	2.0376	2.6738	2.4271	3.8792	3.3344	3.2196	2.4803	
25112													
26001													
26002	4.3583	1.1897	1.9924	3.1897	2.8054			1.7009				1.5516	
26003		0.7523	0.8148	1.3318	1.1467	1.0883			1.6798	1.9183	1.6101	1.6793	
26004	3.2535	5.7664	2.2933	2.9075	3.5048	3.0614	2.6456	4.5877	4.4523	3.1639	3.7903	3.724	4.568
26005		0.8647								1.5561			
26006	1.3445	2.5523	1.3965	1.3813	1.7941	2.8049	2.173	2.8762	2.497	3.1794	2.4764	2.3494	2.0503
26007		0.9661											
26008													
26009				0.9669		1.0931	1.4243	3.0998	1.2515			1.5924	
26010	1.0087	1.4768					1.34	1.3478		1.2785			
26011	2.129	1.6765	1.3616	2.1593	2.0969	2.1987	3.1953	1.8279	2.6109	2.5062	2.4398	3.1862	2.1759
26012										1.9611			
26013	1.5654	1.1178	0.845	1.0294	2.7174	2.1712	2.3599	1.6447	1.8004		4.1085	3.7761	
26014													
26015													
26016	138.9997	137.5065	140.4433	122.7939	159.0876	62.9108	58.9909	94.6391	66.3834	82.3824	109.4035	116.2899	43.6593
26017	1.9489	1.9417	3.0123	4.2641	4.5878	3.4806	4.3186	4.4903	5.2365	3.8879	6.6384	6.5405	2.5322
26018													
26019	1.3529	1.2452	1.1174	1.4212	1.5439	1.6796	1.7177	2.3924	1.7312		1.6722	2.1317	
26020				1.0388		2.6053		1.3051	1.5194	1.9486			1.7771
26021													
26022	1.0761	1.1237	1.2727	1.7091		3.8233	6.3305	3.7832	5.3105	3.8432	5.7444	5.3953	2.2278
26023	1.974	2.8084	2.2333	2.5953	1.908			2.4718		2.1364		2.5898	
26024	8.3803	6.1792	3.3204	4.0941	7.2176	11.222	10.2568	12.3219	13.217	12.549	15.5241	12.1546	10.3646
26025													
26026	1.4507	1.9721	1.7616	1.9795	2.1933	2.7533	3.6223	3.3053	2.765	2.8438	3.0417	3.5263	
26027													
26029													
26030	137.1955	135.2028	134.9721	103.9305	130.4592	56.4765	47.1939	83.4159	43.6594	58.5494	63.3989	76.7189	24.5331
26031	1.2246	1.3506	1.1046	1.457									
26032		1.4368						2.5836	2.2064			2.1129	
26033	7.8192	10.6901	7.101	5.6363	6.992	19.7268	12.1872	14.0226	10.975	13.0502	20.8242	24.5894	13.2528
26034		0.7658		1.0826		1.3853	2.1164	1.3782	2.0257				
26035						1.05							
26036													
26037													
26038	1.0767	0.8831		2.1215	0.9614	3.0716	5.8493	4.0664	4.0398		1.5716	2.2143	3.3568
26039	16.1548	14.5979	6.8835	6.6722	21.344	40.9399	29.788	30.6551	25.3095	65.6183	33.9287	44.986	48.6232
26040													
26041		0.978		1.0739								1.3726	
26042													
26043	2.5209	2.9984	2.5532	4.6202	3.9428				1.8664		2.3145	2.8592	
26044													
26045	1.2405	1.0679	1.4617							1.5336	1.5644	2.7166	1.8867
26046	3.3282	4.0057	2.8141	3.5898	5.5018	4.9054	5.5811	4.748	6.1024	4.7377	5.4152	6.297	3.0545
26048	68.6241	71.8182	63.6567	46.0698	68.9822	25.045	25.3717	46.8413	19.6145	29.7154	24.9688	36.7638	11.0959
26049													
26051													
26052	4.8597	3.4014	4.0647	5.4512	3.8443	12.9255	8.8243	9.7778	7.6267	15.3155	12.1692	9.9367	11.9099
26053	1.4091	1.444	0.9073	1.4788	1.8961	3.2462	4.8002	3.3626	3.4885	3.8069	3.179	3.874	3.5816
26055		0.7273	1.2977	1.2177	1.4571	4.3425	3.6285	1.8684	2.5919			2.6035	
26056													
26057	147.3021	163.7665	142.7221	111.9667	189.8437	74.5469	66.5938	100.106	73.5036	92.8356	95.1754	125.7012	59.5367
26058	2.7856	3.084	3.735	4.391	4.6844	3.8803	7.8916	3.6445	6.2342	4.8412	6.2104	4.5388	3.3122
26059	1.0764	1.0969	0.7432	0.9235				1.2257					
26060	4.7233		3.8721	7.3704	9.0541	9.6415	5.6915	4.8877	8.7868	4.0759	8.6373	12.0117	4.2722
26061	1.8399	1.6697	3.6656	0.9206	1.7994								
26062	2.1218	2.1026	2.4555	2.9701	2.9221	3.2764	4.884	3.963	3.995	2.9735	3.944	4.6165	2.1344
26063													
26064													
26065		1.1077				1.0834					2.0539		
26066	1.4616	1.5127	0.9376	1.54	1.1959	1.7226	1.934	2.2722	1.4193				
26067				0.913				1.3379					
26068													
26069							1.2413						
26070													
26071	0.8765	1.2735		1.2275	1.2435	2.3478	2.4834	2.7161	2.3808	1.8572	1.6863	1.4025	3.6984
26072													
26073	1.0563		3.7156	1.8217	1.0578	1.5952		1.9559	1.3679	1.742			
26074	0.9324	0.8575		1.0319			1.7178					1.3947	
26075	1.7433	1.9655	1.6118	1.8288	2.1076	1.3963	1.9604	1.8771	2.1678		2.2218	2.2574	
26076		3.9475											
26077	1.2168	1.3906	1.4263	2.0913	1.7592			1.2128					
26078	2.228	2.4066	2.6482	3.0519	3.705	4.924	6.4392	5.0313	5.0004	4.5443	6.2579	5.8006	2.9714
26079	2.8005	2.9879	3.5228	4.6416	5.9065	8.8591	12.3037	8.1701	12.0954	9.9866	13.7896	12.1631	11.2766
26080			1.227	3.0122									
26081						1.6474		1.8387				1.509	2.5448
26082	1.0842	0.803	1.4493	2.1083	1.1835	1.1459	1.4016	1.8268	1.4567	2.6076		2.3954	
26083	2.7137					3.1823		1.7207	1.3723		2.5255		2.5446
26084				1.0288					1.329				
26085													
26086	1.3466	1.3673		1.1483	1.8768			1.1001					
26087													
26088		1.5413		0.9074		1.4088		1.7446	1.7137		1.802	1.4735	4.52
26090	4.8132	3.8654	5.7565	5.3268	5.233	1.9445	2.0791	2.756	2.1896	3.1857	2.8623	3.0373	1.7048
26091			0.7325										
26092	2.4924	1.8658	1.4783	1.7403	2.909	2.0273		1.6006	1.4664				
26093	3.6522	3.1838	4.3288	4.9924	4.3901	3.6873	2.9579	4.4237	2.8715	3.8768	3.5677	2.6259	2.9329
26094	1.6901	2.2007	1.3544	2.1712	1.6309	3.8922	3.3881	3.0727	4.2312	4.3541	4.0987	3.8217	2.483
26095			0.9333										
26096		0.7523		0.683						2.0403			1.7144
26097													
26098	1.109	1.0334	1.2435	1.9065		1.5313		1.802					
26099													
26100													
26101													
26102													
26103													
26104			0.8792	0.916									
26105													
26106													
26107				1.6628									
26108	5.0949	3.4645	4.1751	4.7405	3.8955	2.8008	1.7403	2.3934	2.0794	2.8167	3.7109	3.3964	3.2991
26109			0.8203										
26110													
26111													
26112			0.7279										
27001				1.1656	0.9843		1.2562		1.32				
27002													
27003	1.616	2.0594	1.0945		1.8671	1.4583	1.7808	2.4648	1.6376	2.6432	1.7365	2.7382	
27004		2.0509			1.4745			4.8377			3.5578	3.571	
27005													
27006													
27007	1.688	2.4984	1.4268	1.6726	2.2921				1.5204	1.4982	2.2866	1.4652	
27008	9.8014	10.4732	8.3333	11.5575	9.5188	3.2912	2.9003	5.187	3.2675	4.4898	4.4743	6.9931	2.6756
27009						1.6069		1.6745	1.9343	2.433	2.5645		2.3861
27010	1.8209	2.1158	1.559	1.2139		1.7475		1.2509	1.8925	1.8661		1.7254	2.038
27011	0.8719					1.1855			1.3524				
27012	1.9848	1.9365	2.7378	2.9866	3.2117	3.5691	4.0598	4.8606	4.2597	3.0018		4.5825	1.5533
27013													
27014								1.0853					
27015	9.1302	11.7058	10.4785	12.7554	15.1276	17.3589	26.5383	23.6116	19.2831	15.8709	21.6196	23.7275	13.3393
27016	1.2016	1.243	1.3126	1.3909	1.4013			1.1693			2.0132	2.1681	
27017													
27018		1.1533		0.8742		1.419			1.2563				
27019	0.7864			0.9802					1.0818				
27020							1.3416						
27021													
27022	3.3938	3.0223	2.8566	3.8939	5.1208	3.9394	8.4473	3.9058	6.6386	4.1611	6.8678	6.1945	
27023				0.8901		2.2519		0.9897	1.7522			1.7506	
27024													
27025	2.8542	3.2159	2.2748	3.743	3.6239	3.1454	2.7856	6.8146	3.0013	2.289	2.6897	3.254	2.3319
27026	1.0639	1.1009	1.5656	1.4924	1.1321			1.5058					
27027	1.9155	1.2857	3.0564	2.9843	5.1167	3.6564	9.8919	4.4166	8.1692	5.3479	7.4332	4.838	2.0576
27028													
27029													
27030	1.4806	1.1055	0.7877	1.6565	1.8011	1.2371	2.9823	1.8365	2.6026	1.7514	1.9495	2.4913	1.7252
27031													
27032	2.7272	3.5058	1.149	2.4761	1.69					1.6105			
27033	1.4428	1.6822	1.2193	1.1552	1.7672			1.1997	1.4817	1.6164		1.4051	1.8732
27034													
27035	2.1376	1.6959	1.28	2.7915	1.6816								
27036	3.6101	5.8934	4.1183	5.1374	3.9576	1.3463	1.9496	2.5292	1.5814	2.227	1.9555	3.0744	1.6942
27037	4.0728	4.0039	2.8379	4.5225		2.0481	1.4181	1.9067			2.362		1.5867
27038	1.638	1.8411	2.1628	2.452	1.9361	3.1759	2.8229		2.8039	2.3729	3.0129	2.4133	
27039		1.3769	0.6766	1.0624		1.8782			1.4416				
27040													
27041	3.7014	4.4113	3.7776	3.0379	3.5486	2.3454		2.7602	1.8939		2.587	2.7346	2.1994
27042	4.5919	4.8999	3.6444	6.5802	8.6518	8.9315	12.4475	12.1119	15.6195	12.7732	13.247	15.9387	6.8811
27043													
27044								2.0319					
27045													
27046	1.2108	1.3394	1.3416	1.4655		1.4879	2.3072	1.4359	1.8275		2.2129	2.3095	
27047	0.9563			0.7685									
27048	5.2597	4.7838	6.2116	9.9003	5.7501			1.411	1.6163	2.185	2.0769	3.4916	
27049													
27050	1.4452	3.0663	2.0691	1.9283	2.2101	2.5748	2.2708	2.7834			2.0103	2.3249	
27051						2.4117	1.656	1.5509	1.4276				
27052		0.9487		0.8891		1.3309	1.4412	1.2259	1.5093				
27053	11.4377	5.8594	4.9632	9.7966	12.2125	16.0142	18.7478	35.9918	12.3286	11.8777	9.0025	10.7509	18.1469
27054													
27055													
27056					1.055								
27057													
27058													
27059	2.0615	3.0805	2.1275	2.9406	3.522	3.9476	4.1436	3.0208	4.4248	3.0034	3.9246	3.9368	2.124
27060													
27061	1.0962	1.6673	1.5012	1.3363					1.2033				
27062				1.1224		1.7486			1.4278				
27063						1.0934			1.4358				
27064	1.6368	1.624	1.7253	1.5506	1.6514							1.9435	
27065													
27066													
27067	2.9684	1.365		2.2499	3.2765		4.0586		2.1732		2.5992	1.9007	
27068	1.6384	2.13	1.8772	2.0033	2.3936	2.7787	3.371	3.0009	3.347	3.3674	2.4	3.4078	3.0914
27069													
27070	85.7797	163.5754	115.8799	156.4114	209.8968	174.7322	355.8016	274.4655	208.515	114.5572	381.4502	345.2227	81.1964
27072			0.816	0.9933		1.4599	1.5833	1.4793	1.4543			1.7136	1.6102
27073		0.7805	1.1173	1.2885		1.5557	2.7575	2.4643	2.8406		2.9783	2.8918	
27074	1.2572	0.9209	0.8655	1.259		1.4951		1.8119			1.625		
27075			1.1623	0.9245		1.3195	2.0948	1.6508	1.6037				
27076													
27077													
27078													
27079	9.5129	11.9239	10.4002	14.7446	13.0111	12.2216	17.3811	16.5832	12.5284	11.9461	13.405	14.7855	8.4718
27080	1.0132	0.8645	0.9918	1.1586	1.2705	1.5468	2.1157	1.3354	1.3852			1.6285	
27081	1.5852	1.7789		1.5039								1.6899	
27082			0.7404	0.8228									
27083	0.8808		0.7073	0.7988					1.355				
27084	2.4403	7.1223	4.866	3.7917	4.7118	3.9577	2.4572	2.9595	3.0429	2.1454	3.5677	3.256	
27085	3.2624	2.876	3.1657	3.7548		2.7893	3.6246	3.4892	3.2593	3.2716	4.3707	3.9535	2.2278
27086	1.5626			1.145		3.1739	3.0424	1.5425	3.022	7.4499	4.6233		4.0576
27087								1.4577	1.9156				
27088	3.247	2.0758	2.4013	1.4745	2.1494	2.9293		4.6009	2.776	3.5907	3.528	3.7491	
27089		0.8488						1.2317					
27090									1.2979				
27091	0.9274	1.972	1.1039	1.3108	2.027			1.692	1.2065				
27092	2.9137	2.8649	4.2263	4.6484	3.4637	1.7867		1.215	1.5426	2.1511	2	1.8509	
27093	25.8048	23.6137	14.4981	32.9439	31.1209	31.5645	13.4462	21.5224	22.3257	18.4749	13.6238	19.3908	55.8479
27094													
27095		1.0045	0.8947	1.2079	1.2342	3.0104	1.9251		2.0535		1.9738	1.724	2.4273
27096													
27097	6.0168	7.8611	6.6088	6.91	6.039	1.4722	2.0765	3.9758	1.7958		1.9473	3.2789	
27098	6.2424	6.1511	5.6947	4.3207	6.6641	1.8889	1.5791	2.199	1.6714	2.7381	2.4279	3.0928	1.6798
27099	0.905			0.8748			1.2994					1.4722	
27100	0.8937		0.7835										
27101				2.6483		2.0081	2.6451						
27102													
27103	0.9095		0.8282	1.2101	1.6937	2.9091	2.7437	3.0889	3.2621		3.5015	4.5422	2.0412
27104													
27105	0.8515												
27107	5.8508	5.7601	6.8061	7.4517	7.7546	5.9866	8.4269	6.3616		5.605	5.7527	6.3885	3.7375
27108	1.8083	2.2917	1.5519	3.1374	2.3402	1.6555	2.8429	2.025	2.8877		2.0668	2.4883	3.5943
27109	0.9421			0.914			1.5825	1.2441	1.3369				
27110													
27111							1.249		1.4204				
27112	3.2941		0.7422	1.1718									
28001													
28002	1.3499	2.0927	1.367	1.9879	1.9544	2.254	2.0311	2.4237	2.0923	1.8876	2.7281	2.6174	
28003	2.0594	6.0165	3.0177	4.2354	7.5996	1.0947	8.1563	2.1251	7.4364	5.0646	6.0904	7.0486	6.9531
28004	2.2065	2.7069	1.4428	2.7824	2.3899	1.5436	1.6124	1.7894	3.0314	2.6	2.5448	2.0185	2.0564
28005								1.0432					
28006													
28007	9.1094	11.1425	9.0737	9.9218	9.1419	3.6638	2.9627	6.62	3.8841	5.8637	5.7939	8.399	3.1955
28008		1.117											
28009													
28010	8.3348	13.8737	11.5403	16.8844	20.5108	18.5015	31.2586	25.6388	33.991	13.6455	27.0427	26.6551	28.6467
28011													2.9303
28012													
28013													
28014													
28015													
28016	4.7498	5.4086	3.3309	5.2549	4.6302	1.2525	1.3887	2.1732	3.0365	3.2309	2.8588	4.0421	
28017													
28018	4.4103	2.4215	0.9588	1.9232	1.348	1.4172		2.5357	2.0077		2.6364		2.0139
28019													
28020	2.4437	1.6361	2.1509	1.8621	2.7175	2.7766	1.5935	2.5675			1.834		
28022													
28023													
28024	5.4794	9.5389	4.107	8.8459	6.4145	8.3192	10.4176	16.6189	12.7344	9.3534	8.445	8.9942	8.9683
28025	10.9122	11.0807	6.8234	9.8529	13.8782	29.0819	23.7832	24.263	20.4526	12.6775	28.239	27.8199	31.801
28026													
28027													
28028		0.7584		1.1821									
28029		1.1482						1.5003	1.2679				3.8413
28030	2.7959	3.3241	3.1078	3.2929	4.334	2.9837	3.7271	3.7737	3.9734	3.6636	4.9408	4.3602	3.045
28031	3.3051	1.3956	2.5035	1.519	2.4963	1.5547	1.3549	1.2865	2.4447		2.9521	1.5955	3.0829
28032	2.6197	1.4947	1.6024	2.4873	3.1043	2.064	2.1028	2.67	1.4218	1.6286	2.4935		3.2692
28033	2.02	2.0028	2.0819	2.4667	2.7597	1.9767	2.983	2.5683	2.4822	1.9596	2.9754	2.6224	
28034	3.5852	5.1131	2.4317	3.6286	3.7147	3.2885	4.7627	3.8652	4.1975	3.2275	4.6315	4.2751	2.2841
28035													
28036	14.0996	10.175	41.3194	47.4568	16.2808	44.7621	56.2328	30.4205	42.2833	26.138	42.3615	28.7483	67.8404
28037													
28038													
28039	1.4238	1.3295	1.9575	1.7178	1.6476	2.4341	2.5903	3.5295	2.7483	2.6614	2.3958	2.7405	
28040	2.2886	2.877	2.5755	3.4471	3.307	3.9708	5.1164	3.715	4.3121	3.8052	5.7433	4.8533	4.625
28041													
28042	2.2531	3.1743	2.9075	3.0805	4.4319								2.7273
28043													
28044													
28045													
28046	10.6255	27.9839	10.3188	9.8245	19.4647	12.6489	17.546	29.4643	14.1522	8.7003	10.2174	12.9038	17.9867
28047													
28048	3.6401	4.0436	4.4583	5.0266	6.1644	4.9609	6.7185	6.2639	5.0838	6.0674	7.4627	6.4779	
28049	3.6575	5.1918	4.3937	4.7417	5.793	4.7083	8.2284	5.1012	6.3287	5.3761	6.5826	5.9333	
28050	0.8451		2.4045	1.1907			2.28		2.2972		2.875	1.8584	
28051													
28052	1.0977			0.9698		1.3611		3.7955					35.6477
28053	1.8558	1.8013	2.6438	2.9315	2.9672	2.6879	3.5571	1.823	3.2465	2.3828	2.687	4.385	
28054													
28055												4.4021	
28056	1.565		1.5088	1.4474	1.6603				1.1311				
28057	1.9362	1.2657	2.0475	2.241	2.654	1.9438	3.0609	2.7817	3.3528	2.5134	3.7174	4.1307	3.2213
28058													
28059	1.6833	2.2274	1.5	2.341	2.2561								17.7287
28060	1.1027	1.6341	1.7641	1.5182	1.8463	1.3841			1.7588	1.3699	1.6556	4.1961	
28061													
28062		1.5804							1.4037			1.3739	
28063													
28064	0.9583	1.243	1.28	1.7692	1.7051								
28065	3.0096	1.74			1.0107	1.8501		1.9467				2.6259	2.8507
28066	1.9366	2.6119		5.0388	3.4441	2.4429	2.1923	2.9163	3.9323	2.4792	2.9594	2.7849	2.9632
28067		1.2422	0.9431	1.6443	1.1921	1.5573	1.6179	1.5059	1.6108				
28068													
28069													
28070													
28071	3.9397	4.0141	3.61	5.8304	5.7867	6.0313	7.297	5.0477	5.6101	5.2739	5.7999	5.9802	5.0063
28072	5.1052	2.0742	7.373	10.2684	6.2323	11.4133	22.8394	5.5144	14.2938	16.4964	10.68	14.188	7.1884
28073	1.4894		5.5288	22.0477	11.6315		2.1544	51.1965	26.3003		87.328	11.7905	
28074													
28075													
28076	1.6683	2.0343	1.9427	2.2814	2.2196	2.5137	3.4587	2.5818	2.3676	2.2335	2.334	2.7386	1.7364
28077	217.993	233.4736	206.0637	214.6758	231.2518	93.4692	81.9461	124.3996	91.2835	104.5866	147.1115	151.3497	57.9022
28078	1.0122	1.1405	0.8988	1.3955			1.3956	1.6716	1.3324				
28079	1.5404	1.5941	1.5254	1.4119		9.6608	3.8029	2.4705	1.6287	3.7609	4.0663	2.6283	24.3557
28080	0.7568												
28081		1.8694											
28082	3.0016	4.1862	5.7798	8.4545	6.1614	4.3043	5.3793	6.6956	3.554	3.6003	6.4844	7.4782	
28083								1.0003					
28084	2.8234	4.1406	2.2522	3.3043	4.2596	1.4622	1.7566	1.7673	2.1775	2.7738	3.2587	3.4122	
28085	1.0909	1.0599	1.6005	1.5332	1.7116				1.3483		1.5024		
28086		0.878											
28087	1.0416	1.4799	0.7186	0.8322	1.1895								
28088	1.1491	1.9951	1.2627	1.5383	1.5634	3.4164	1.5415		1.6286	4.5926	2.7462		3.5104
28089		0.7843	0.7419	0.8493									
28090													
28091													
28092													
28093	0.8245	0.8777	0.9801	1.3042	1.6924	1.9433	1.7918	1.4114	1.2801			1.7717	
28094	1.7047	1.635	1.2156	1.0289	1.6088		1.491		1.9575	5.1345		2.3164	
28095	2.6336	2.9661	3.7627	2.4635	2.4178	4.6279	3.2132	3.9774	3.1392	4.7906	2.8793	2.3473	10.2719
28096													
28097													
28098													
28099	3.2678	2.2419	2.7743	4.5945	4.5946	6.2085	8.7195	4.2414	5.2857	5.9609	8.3214	7.3755	7.239
28100							1.6157						
28101	1.0665		1.0081					1.2906					2.4864
28102	4.3991	4.39	3.2006	4.5389	4.528	7.3696	6.5026	6.7788	5.3751	7.286	6.0291	4.7474	7.5323
28103													
28104	2.4177	2.7929	3.8868	3.2127	4.2017	2.5934	4.4158	3.4785	2.7201	2.5995	2.3542	2.7547	1.8884
28105													
28106		2.0607	2.027		1.8038	4.0232	1.8169	7.2027					10.7296
28107													
28108	5.7208	8.2327	5.505	4.7184	6.6211	5.5619	4.7141	8.1581	5.6001	9.1806	7.178	9.7537	18.4981
28109	4.176	5.0545	2.9553	4.0827	3.2398	1.5427	2.2269	1.6639	2.4331			1.985	2.3663
28110	7.0316	7.5583	8.4103	8.5029	8.369	2.2743	1.7578	3.2384	2.3572	3.3875	2.832	3.4841	
28111	40.1959	35.9913	36.1021	24.8276	37.6832	8.1421	5.8954	10.3116	7.1511	7.8233	7.488	11.8545	5.6206
28112													
29001													
29002									1.1579				
29003	1.0289	0.868	1.0918	1.3506		1.5408	1.4786	1.6617	1.9239	1.7432	1.8339	2.0758	
29004		0.8522	0.6658	0.9173								1.4007	1.9519
29005													
29006	0.9137	0.7092	1.0221	1.1134		1.9726	2.2753	2.161	2.1125	1.5761	1.955	2.4015	
29007	4.2814	6.1343	5.5543	6.3821	10.4108	8.1556	11.752	12.1343	8.8974	8.303	10.9101	11.9891	
29008													
29009													
29010	0.9349	1.1021	0.9545	1.0325							2.584	2.6632	
29011					1.5997	1.4016							
29012													
29013													
29014	1.2973	2.172	2.2054	3.49	2.8236							1.7644	
29015													
29016													
29018													
29019				0.8666									
29020	1.3394	1.6385	1.2557	1.769	1.5501	1.9242	2.6357	1.8795	3.1709	2.497	2.8952	2.7139	3.7554
29021													
29022													
29023			0.7984										
29024	2.6359	3.3127	2.629	6.0049	4.1049	5.9932	9.5648	6.7079	8.4784	8.895	9.6886	10.9243	8.2932
29025													
29026													
29027													
29028	1.9321		0.8614	0.9443		1.2111		1.3951	1.2057			1.6917	
29029	17.682	26.1199	28.9828	41.1633	44.3194	25.1919	64.2241	54.4094	36.9534	25.007	44.1933	55.3323	11.9333
29030													
29031													
29032													
29033													
29034	1.312	1.5665	1.675	2.2786	1.9325	2.3827	3.262	2.2359	2.6403	1.8355	2.8759	2.5366	
29035						1.4737							4.5545
29036													
29037													
29038													
29039													
29040	2.1173	2.3675	1.1213	0.9442	2.3101	3.925	2.2738		3.5953	5.0632	5.0408	3.1646	2.2706
29041													
29042							1.8704	2.3029	1.8169	2.3423	1.8462	1.9785	
29043													
29044		1.1786	0.7638										
29045													
29046													
29047	78.4584	28.8948	102.4579	81.2089	108.7929	212.9754	215.1032	311.6338	287.7221	109.5211	198.7567	94.7321	108.5701
29048													
29049													
29050		1.3152											
29051													
29052	1.847	3.3073		1.3443	1.4479	2.2422	1.3759	1.7276					
29053													
29054								1.127					
29055	1.6316	1.6982	2.2375	2.1555	2.7308	1.8546	2.6728	2.0438	2.4974		2.3777	2.6496	
29056													
29057	1.1398	1.7374	1.9739	1.4456	1.7628	1.606	3.1059	2.5094	2.6639	1.9416	2.1429	2.8334	
29058													
29059	1.5122	2.2081	2.8603	1.4062	2.6514	1.3225			1.4565	2.2195	1.5203	1.6452	
29060	1.5042	1.8307	0.7329	1.0627	1.1464	2.2076		1.4663		2.4517	2.3892	2.133	2.5784
29061			0.6055	1.2578		1.208		1.6801	1.3413	1.3433		2.2255	
29062													
29063													
29064			1.2508	0.9172	1.8314		3.5962	1.4449	2.4923	1.7798	2.6656		
29065	1.5931	1.5357	1.1758	1.5864	1.712	1.0405		1.2087					
29066													
29067													
29068													
29069													
29070													
29071	1.3725		3.5701	1.9712	2.3929			1.2276					
29072	0.8443	0.6944	1.0423										
29073	1.0134	0.8766		1.0632	1.3378	1.4668	1.4825	1.2117				1.6868	
29074	9.5653	11.42	11.6213	12.4329	14.0306	18.848	18.4835	15.6837	14.8234	12.6237	15.9293	19.1488	
29075													
29076	0.9746	1.0422	0.9087	1.3423	1.3556	1.4885	1.4839	1.2408	1.535		1.6235		
29077	1.5004	1.3626	1.4346	1.9181	1.9064	1.694	2.8447	2.5521	3.3249		2.9432	2.7128	
29078	1.9014	2.4706	1.9353	2.0724	2.8996		1.3252	1.5239	2.1216		1.6602	2.3084	
29079													
29080		1.3241		1.0997	1.8352								
29081													
29082		1.6297											
29083				0.8308									
29084													
29085													
29086													
29087	2.9155	4.5577	2.2093	4.5637	3.1098	5.0817	6.1087	6.7934	4.2775	3.1358	5.3943	5.0008	4.2225
29088	1.7031	1.7964	1.9547	2.4024	2.8691	2.8012	3.3146	2.2225	2.4507	2.4663	3.071	3.1217	
29089		4.4234				4.113		1.8353	1.4058			1.9434	
29090		1.2165		0.784									
29091													
29092								2.8117					
29093													
29094	1.8668	1.8859	2.859	3.9198	2.7698	3.4864	5.672	3.5809	2.1724		3.1953	4.5547	2.0185
29095													
29096	2.0723	2.296	3.2935	3.692	3.718	2.5127	3.7344	3.459	2.294	3.2256	3.7147	5.0153	
29097	1.7106	2.5667	2.0496	2.9151	2.745	1.7972	1.8375	2.406	2.0899		2.6543	2.6833	
29098													
29099													
29100													
29101													
29102													
29103													
29104	1.0669	1.0268	0.8295										
29105	2.1419	2.8237	3.8743	3.3157	3.5447	2.2853	3.6846	3.89	3.3747	4.1096	4.4067	3.2283	1.6753
29106	5.25	5.9677	6.1225	7.0489	7.545	5.852	6.9365	6.2597	5.1117	5.6189	6.6535	6.6317	4.5457
29107				0.9424									
29108	3.1568	2.5966	3.0827	3.753	4.2305	2.792	4.3457	2.9446	2.8603	4.1703	2.7275	3.4809	3.3325
29109													
29110	15.8409	18.5738	26.9872	36.6565	35.0283	28.9889	48.9038	34.251	23.2023	17.1564	24.7979	33.5945	18.8121
29111		0.6963		0.982									
29112	0.9036	1.0998	0.8857	1.6418		2.872							
30001	1.9454	1.6237	1.0116		1.4327	1.3952		1.2932			1.6324	1.61	
30002	1.2213	1.5085		2.4708		2.0204	2.746	1.4382	2.6048	1.7377		1.5502	3.252
30003													
30004													
30005		1.2784		0.9466	1.3247	3.0374	2.2135	2.4062	2.2224	2.1593		2.2033	
30006	4.754	5.6902	4.4823	4.6607	6.6376	8.1187	16.0037	18.5812	14.9732	16.1689	12.9312	15.0263	16.5479
30007						1.4439							
30008	38.9151	25.411	18.5163	24.7569	51.3964	40.1086	64.7895	55.749	56.8431	48.5208	42.2666	70.8131	79.6068
30009	1.7431	2.0061	1.2702	3.196			1.7496	2.0668					
30010													
30011													
30012													
30013													
30014	4.0686	5.4768		6.3958	3.7059	10.0956	10.9163	12.8937	11.3461	9.9684	10.3585	11.0266	14.4624
30015	5.1861	14.785	4.1361	7.6586	3.5089	17.9934	8.7923	15.0802	7.9981	14.8585	9.9021	10.5002	25.3572
30016	7.3	5.7042		2.0263		7.9362	7.4823	7.7969	32.6158		5.4175	5.1172	10.2628
30017													
30018	0.9549	1.4021		1.5697	1.4235		1.656	1.8097	1.3321		2.9534	1.5873	
30019													
30020	2.9358	4.8277	1.7473	3.0069	2.9868	6.917	3.5783	5.9187	5.5677	3.2986	5.0064	5.6616	4.6656
30021	1.1497	2.061	1.4276	1.8521	1.7224	2.6571	2.7432	3.616	3.941	6.2545	4.2162	3.4425	5.4781
30022	5.3446	5.7819	3.1374	6.1867	8.844	11.5212	6.0302	9.7373	8.3229	4.3747	9.1656	10.0076	11.0647
30023	2.684	2.6958	2.8672	3.6256	3.3295	3.0133	4.0645	4.8816	3.0181	4.301	4.2603	3.7284	2.1559
30024	1.7675	2.1662	2.063	2.6622	2.9907	3.234	4.1167	2.9818	3.58	3.048	3.3454	4.0995	
30025													
30026	0.9673	1.5518	0.8359	2.2206	1.6761	1.6083	3.5177	2.2365	3.3123	2.2485	2.9764	2.3165	3.2534
30027	1.106			2.9277		8.9344	30.9041	2.1202	10.3117			24.3527	2.3676
30028					1.348	1.595	1.4743	1.4508	1.7739		1.7857	1.8642	
30029	2.1397	3.0963	2.0765	3.0024	2.4678	3.1379	4.2011	4.1605	5.2107	3.0161	5.8032	3.9748	4.6337
30030	2.3801	13.4805	4.5958	8.8499	8.7509	16.864	21.1158	26.7668	15.987	12.8571	12.424	13.0027	28.4651
30031	5.7987	5.6318	5.1661	7.9897	6.8174	6.9833	12.4617	11.699	10.8986	9.6912	8.9408	8.8745	6.398
30032													
30033													
30034	0.7939					1.0918	1.6145	1.4278	1.4352				
30035	42.7851	19.6739	9.4825	14.6606	15.3091	18.2979	20.4442	13.8352	40.3106	13.514	26.8177	16.4225	48.3619
30036	6.1313	3.7454	5.9295	7.4427	6.9013	6.3658	7.5113	6.8726	8.9192	6.3658	4.6094	7.6885	15.6445
30037		0.6653											
30038													
30039													
30040	12.3557	32.6731	22.6043	30.9143	26.0761	79.7395	71.4639	73.4779	62.8262	35.7739	63.9975	35.0699	67.7378
30041				0.8558					1.2096				
30042			0.8358	1.1036		1.3567	1.3782	2.0696		1.9218		1.8509	
30043													
30044	52.6626	40.625	32.4564	33.246	39.6795	36.6837	87.9327	59.6317	77.5049	59.2528	67.4817	63.2271	131.7946
30045	10.1565	10.1995	10.794	7.619	8.5069	3.5509	3.1452	5.2484	3.6989	4.5004	4.0848	5.4328	1.8619
30046		1.0741	0.846	1.3564	1.5318	1.6796	2.1867	2.4643	2.0659		2.9893	1.9485	
30047													
30048	17.3734	10.8447	5.7512	8.0971	10.1723	17.4772	8.2873	14.0686	8.4154	9.1704	16.1152	16.5468	8.0676
30049				1.0314									
30050	2.8219	4.4056	6.1393	5.6438	3.4078	5.2703	7.7782	8.1575	7.2524	7.5749	4.9373	4.9205	16.2315
30051	9.9125	18.7762	9.1823	12.7721	7.2163	11.8617	11.333	12.2826	8.5286	20.8818	13.1123	8.8466	19.0496
30052		1.6627	1.7517	2.5754	4.8164			3.8515	1.3943	1.8108	1.7001	1.7072	
30053													
30054	17.9396	11.8939	11.4367	9.3313	15.7517	20.4391	38.3517	22.6401	37.0295	22.9517	26.4631	17.8632	35.6812
30055	1.1563	0.9859	0.9528	1.6721	1.3225	1.3515	2.0765	1.6066	1.74	1.3866	1.6406	1.5318	
30056													
30057	0.7666		0.7593	0.83									
30058	1.5163	1.5736	1.4894	1.2015	1.5369	1.3565	1.7808	2.5258	1.8744	2.9035	1.9744	1.9177	3.2314
30059	1.1153	1.0634	1.7383	0.9779		1.0693		1.1196		1.6062		1.5291	
30060	6.4489	8.2935	9.0113	5.9003	13.8466	15.306	18.0705	10.8936		12.0131	12.018	16.8624	5.7244
30061				1.0876									
30062	2.4472	2.7377	2.208	2.5754	2.3457	2.4448	3.0737	2.7957	3.9588	2.8352	4.41	3.4213	2.6668
30063													
30064	19.7022	13.4635	12.5868	12.5858	13.9898	18.8714	33.5661	28.1311	29.5781	27.3122	22.9529	21.0395	25.0262
30065	1.9919	1.7306	1.7537	2.2029	2.8341	2.6366	3.4597	3.5971	3.1549	3.196	3.3778	3.491	2.2604
30066													
30067													
30068	3.3113	3.2125	3.3103	3.6872	5.2342	7.4943	6.9634	6.6079	6.6489	7.4019	8.4917	5.1611	13.2524
30069	1.3544	1.9319	0.8403	1.2981	2.3351	2.3618	1.357	1.9209	1.5723	3.4153	3.9323		5.3707
30070	0.8897												
30071	30.4937	26.5894	28.9229	47.3107	46.3297	78.3696	89.7398	69.2072	91.1791	46.0065	86.1222	60.0487	105.8458
30072	1.04		1.0349	0.8778									
30073	6.4294	7.0444	7.4082	8.6806	8.5568	8.9226	17.1853	12.522	11.3871	8.3981	11.7755	10.561	8.9136
30074													
30075	2.1946	3.7261	1.1421	2.6274	3.5418	1.9886	3.9072	2.995	2.3134	2.3076	2.2892	2.6344	
30076	1.8012	1.9004	1.358	2.6967	1.9877	2.2003	2.5539	2.6351	1.9661		2.1186	1.9442	1.8183
30077	23.7663	23.8667	18.311	23.1393	38.8634	61.1676	104.8092	70.0259	68.0772	79.9974	60.7273	66.7218	73.4832
30078	10.0777	11.9072	14.1207	14.637	19.3037	20.2263	22.8711	26.9165	18.6989	20.306	21.0471	20.2819	14.0667
30079	24.3191	18.1262	9.3348	13.2616	20.3352	33.5448	22.2695	27.7807	19.8403	15.8445	27.8107	24.0351	35.9743
30080	1.5797	2.9793	2.2121	3.7146	2.533	3.2594	5.4264		3.5918	3.5598	3.2868	4.1485	2.4402
30081			0.6963			1.1913							
30082	15.3036	16.0037	9.8127	16.2494	14.4184	24.6363	28.1272	22.3842	30.8427	34.3685	34.1528	38.2761	63.5966
30083													
30084							1.8528	1.274				1.3047	
30085	2.9048		1.6859	2.6996	3.3051	1.4488	2.8135	2.1162	1.5193	2.7325	1.9173	2.598	2.8425
30086	1.6025	1.2829	1.1101	1.3704	1.9746	1.6536	2.5361	1.887	2.004		2.4027	2.4509	
30087													
30088	3.5195	4.6986	2.8233	2.9893	4.5218	4.6132	4.2589		4.41	4.4464	4.9357		6.296
30089	5.363	5.7211	6.0992	8.7987	8.2141	14.3787	8.9815	11.507	13.2034	12.4389	17.869	11.8701	27.0306
30090													
30091	2.7606	2.3033	1.3656	2.8721	6.1185		1.7189		4.4863			3.4358	
30092	2.6356	2.0834	3.073	3.3047	2.819	1.7401	4.7086	2.6638	2.4627	3.1962	1.9116	2.7211	3.4064
30093		2.9439		1.5938			1.8906	1.2491	1.7535			1.4435	3.2856
30094			3.6578	2.1661			4.4743	4.9774	1.8831				
30095													
30096	1.0141	0.9651	1.2929	2.1966	1.6123	1.1468	2.0454		1.4419			1.5715	2.2971
30097	0.8055			0.9123		1.1233	1.2257	1.1271					
30098	2.8099	2.5499	3.0274	1.558	2.2823			1.7241	1.587			1.2908	
30099		1.8473	0.8534	1.0003									
30100	3.9989	4.8715	3.4325	5.0774	5.8877	5.6955	6.4497	7.863	6.311	6.652	4.9902	4.8989	4.4734
30101	2.3715	0.7728	9.8658	13.5062	14.5722	5.4454	20.4369	5.1184	5.7964	12.6047	6.8913	8.4587	4.5159
30102	4.7259	5.2612	6.9044	7.0135	7.329	5.7361	9.6193	7.0624		5.8015		6.9059	4.206
30103		0.6521				1.2306							
30104	4.7713			1.4189	2.4927			1.7868	1.7183				
30105	1.03	2.6681	1.1564	1.8211	2.7094	2.1145	2.4623	6.5101	1.6665	4.2474	2.6719	1.6693	8.6802
30106						1.018							
30107	4.259	3.5557	2.8625	4.7487	4.3661	4.0951	4.2542	3.4259	4.3988	2.9407	4.3408	5.0854	8.4832
30108			0.7132	0.8639									
30109													
30110													
30111													
30112	2.0722	1.508	1.9373	2.464	2.9068	2.1268	1.916	2.1623	2.1959		2.1761	2.5182	
31001	1.2738	1.747	1.5566	10.0939	8.1332	3.6025	30.6859	1.4212	12.1285	2.497	17.6434	13.6646	3.8006
31002		0.7331		0.9213	1.1957				1.0459				
31004											1.3816		
31005	2.3214	2.681	1.7975	2.61	2.8146	3.2315	4.0185	5.3362	3.3166	3.1819	3.4489	2.479	
31006	2.4258	2.5886	3.0185	3.9756	2.9949	2.7037	3.4749	2.8936	3.219	3.2657	4.3353	4.1784	4.0152
31007													
31008	1.6601	2.4773	2.542	2.8323	3.5741	2.4658	2.4074	2.5231	2.7394	2.2374	2.8051	3.1567	
31009	1.2438	1.3861	1.6275	1.5862	2.1373	1.3974	1.5813	1.5802	1.7679	1.6744	2.25	2.3431	
31010	0.9192	1.2607	1.8403	1.975	10.5362	4.322	32.843	5.7557	2.9581	2.4786	5.2604	7.0325	
31011													
31012		0.7527		0.9829		1.6224			1.9564				
31013	0.9868	1.0336	1.1476	1.5041	1.7866	3.7769	7.5142	3.4691	5.942	4.754	7.5372	6.3361	5.1781
31014													
31015	2.111	2.146	8.0455	6.6113	4.1994	3.6194	11.736	4.5772	7.31	2.6717	5.0723	7.5633	
31016	1.3335	1.3904	1.2038	1.3685	1.7347	2.0716	2.5035	2.293	2.3341	1.8253	2.9764	1.8516	
31017													
31018	12.2214	11.9841	9.7431	12.3684	13.2136	24.7219	24.0484	32.844	27.6469	35.0374	20.8272	19.7389	55.0582
31019	1.6506	1.2992	1.2419	1.3639		1.4949			3.6332			1.2312	
31020	10.9109	13.2945	11.6081	13.7666	12.4369	11.228	13.6798	12.1515	13.9199	11.802	11.7883	10.681	15.2285
31021		1.142	0.832	0.7922	1.4395	1.4	2.2194	1.7526	3.2861		1.9196	2.4537	4.2302
31022					1.4423		2.035				3.5692	2.4627	
31023													
31024													
31025													
31026			0.7854	1.297	2.3149	1.6871	2.7142	1.7528	4.1211			2.6381	
31027		0.8247											
31028	6.926	23.6678	7.7101	18.0892	16.6741	1.3656	1.5208	3.9801	1.6038	3.2111	2.1656	3.7143	
31029	0.7716	0.8201	0.7883	1.1809	1.1504	1.7596		1.224	1.6427	1.7861	2.0944		
31030													
31031													
31032			0.6743		1.2092	1.0459	2.0131		2.2339				
31033		1.5615		0.7755									
31034													
31035	2.7095	4.2644	2.9889	3.0148	2.4912	7.0055	4.3351		3.9422	5.8385	6.0699	3.2974	33.2176
31036						1.2631	1.3036						
31037	1.3202	1.1328	1.6085	2.1625	2.0343	3.5332	3.0883	3.8081	2.8597	2.2862	3.991	4.1498	
31038													
31039	11.207	14.0029	5.0515	12.682	15.5234	28.0011	50.3405	52.6071	34.9649	26.855	42.1287	38.0852	13.6003
31040									1.7559				
31041													
31042													
31043	2.4182	2.1251	1.7213	2.1775	2.7705	8.8428	4.5952	5.8544	4.3835	5.1817	5.813	6.0665	4.1302
31044													
31045													
31046													
31047	1.3638	3.5275	1.6242	1.6423	1.6143	4.6755	3.261	4.7264	3.6351	4.2205	3.8524	2.771	3.3664
31048								1.1568				1.6732	
31049													
31050	6.9686	7.5751	8.2369	8.4396	13.4563	9.8758	23.2242	11.6569	16.73	11.5682	17.6055	14.5061	6.018
31051													
31052	2.0128		2.0921	1.2728	2.157								
31053	1.2526	0.9873	1.0432	0.9633	1.7293	3.7588	2.1919	2.6737	2.943	2.0101	2.1068	2.7212	
31054	1.1193	1.2647	1.3924	1.1625		1.9423	1.4749	1.4159	1.6805	1.5446	1.5104	1.4396	2.2386
31055													
31056		0.706		0.7889		1.0476				1.2014			
31057	7.4361	5.8365	6.1186	7.4064	5.6029	13.1852	9.8988	8.307	12.4347	8.6767	10.0075	13.334	26.5141
31058													
31059							2.0748						
31060	23.7442	24.5333	17.4368	28.0819	22.4483	83.409	76.6137	65.9465	59.4136	45.251	49.295	48.8524	84.7078
31061													
31062	1.0563	1.2973	1.5231	1.7829	2.076	1.9209	3.9123	1.9134	3.3338	2.8145	2.6312	2.4955	
31063	28.9371	11.5315	26.4382	16.7927	28.6421	2.3705	2.3055	15.4272	8.8547	49.8099	22.6167	14.1636	5.8303
31064	1.3581	1.4403	1.6701	1.6985	1.9471	1.6367	2.262	2.0368	2.4357	2.1692	2.0431	1.4401	
31065													
31066	20.8514	26.1712	28.9484	30.7327	33.0084	24.1187	41.2597	28.9443	29.2899	18.904	27.9846	31.6118	14.5023
31067	1.4021	1.5586	1.5769	1.8654	1.8271	3.0291	3.2833	2.5024	2.6322	2.4312	2.1721	2.6013	2.5825
31068	2.8894	5.8278	7.8845	5.9739	5.9326	3.4881	5.9737	5.2232	2.983	4.8128	3.3933	3.2498	1.899
31069													
31070							2.6352		2.4636				
31071	2.2543	2.1866	1.7667	2.2152	3.742	6.553	7.4071	5.4485	5.3337	6.0247	4.0795	5.8126	
31073	2.3797	5.416	2.3131	2.9836	2.9384	1.1395		2.2991	1.4009		1.8033	2.8855	
31074	1.4319	2.3491	1.3764	2.5149	2.2143	1.7864	3.2013	4.4072	2.6918	2.3054	3.5891	2.9938	5.191
31075	5.4167	3.1825	2.6664	4.149	5.6304	3.6161	7.0565	5.0635	8.701	6.9817	8.5603	6.938	13.4679
31076													
31077													
31078	2.1341	2.0068	2.3297	2.8088		2.7415	3.5432	2.5788	3.0549	2.8421	3.0456	3.0064	
31079		0.834				1.1019		1.0527	1.4571			2.1128	
31080	3.0263	1.563	1.879	1.8641	2.1692	1.2375	1.6771	2.2413			1.97	1.8237	
31081	5.8488	4.7466	1.6391	3.2342	3.7044	5.8627	2.2308	2.9188	2.2683	3.272	2.9219	2.7242	3.3303
31082													
31083													
31084	1.5052	1.0382	0.7887	2.0946	1.1559	1.4077		1.6231					
31085	6.4142	13.2888	3.7373	6.3543	6.516	14.0627	11.4554	21.5018	11.9189	9.7631	9.7228	8.7652	8.2431
31086	1.8235	1.0837	2.8307	2.2876	2.1874	5.3573	6.4164	4.3407	3.6402	4.372	4.1113	2.8983	6.8287
31087	4.6664	6.6054	4.973	5.0277	4.6229	2.5255	1.6241	2.9693	1.8127	2.6341	2.5752	3.2866	1.7847
31088	6.3106	6.1554	9.6505	10.6036	9.8604	13.484	18.8586	16.6223	8.5021	7.1763	10.3702	12.8774	4.9772
31089	8.6855	6.9246	8.76	7.6996	6.2031	9.9661	11.822	11.3879	8.9111	9.3936	7.862	8.1366	7.172
31090													
31091	7.2972	8.0914	13.1337	12.6414	12.0724	19.0235	25.5222	21.3953	13.8153	10.9545	14.6252	19.6461	10.454
31092					1.8493				1.688		2.0853		5.3335
31093													
31094			0.9959		1.6695								
31095	4.2485	8.4824	2.3167	5.4743	7.6373	9.4852	12.2967	18.5567	9.9752	16.8751	16.0275	11.3421	15.4859
31096						2.6116		4.507	1.2341				
31097													
31098													
31099	14.7782	12.2526	15.2444	17.6691	9.8298	33.4951	40.1891	31.2809	25.2245	28.4604	41.5695	34.9311	31.3994
31100	2.3902	2.0994	2.5251	2.7212	2.5246				1.2652	1.9886			
31101	4.1647	3.8571	5.6267	6.1576	5.7344	6.3428	6.1442	4.8842	4.6217	4.1292	4.8841	5.3702	3.821
31102	2.7307	4.7728	7.8084	6.5182	4.107	3.5293	4.1249	3.5234	4.8367	3.4599	3.5266	2.233	9.2202
31103	3.2188	1.9113	6.3673	4.759	5.2401	4.4958	4.5413	4.7881	5.4506	4.0342	8.0106	5.0944	10.3372
31104													
31105													
31106	3.1339	3.6946	4.6792	5.4943	5.7952	4.2859	3.3361	4.9789	4.7476	4.5621	4.9357	4.8409	2.7703
31107		1.7098	2.0709	2.1894	2.7937	2.7118	4.9046	7.1871	3.5937	3.0769	3.1828	3.6723	8.5034
31108								1.3633					
31109	1.8635	3.5817	1.4069	1.6563	3.3177	3.8629	3.0333	5.7793	3.8692	2.3985	2.25	2.4668	3.1595
31110						4.7864							
31111													
31112													
32001		0.8994		0.9403									
32002													
32003	1.3805	1.7113	1.5446	1.7941	1.7767	1.7923	2.2257	1.819	2.1104	2.1736	2.1	2.3791	
32004	8.935	13.4246	12.1691	15.3641	18.7493	12.7836	18.1005	18.7848	16.9043	15.3172	18.8586	21.6593	9.2537
32005	4.6872	5.3581	1.6092	3.2342	6.2223	3.2252	2.4215	5.4609	3.7626	4.1716	5.6966	5.3279	5.5239
32006	9.0535	17.5459	4.0957	9.8992	12.7775	4.6538	7.2696	6.5122	9.8932	11.5807		8.7284	4.9797
32007	7.034	9.9542	10.1612	11.6373	13.1084	17.1483	20.181	21.0198	16.7281	17.8998	18.6363	18.6767	16.1996
32008													
32009		2.7375											
32010	5.0078	2.3664			2.3618		3.6316		3.2647		2.5934		4.1176
32011	6.1769	8.312	2.2492	3.7615	7.3412	11.462	9.9691	16.3766	10.8745	3.3544	14.1026	10.4603	8.3001
32013	1.349	1.3926	0.9224	1.8538	1.754	3.0165	3.4902	5.3334	3.1131	3.5308	2.9253	3.5194	6.6331
32014													
32015													
32016													
32017			1.0057										
32018	1.8218	1.9143	1.4048	2.1383	2.2004	2.3957	2.1554	2.0517	2.1412	1.8633	2.2636	2.7621	
32019	4.151	4.5756	3.4226	4.0399	4.2861	6.1122	5.5844	6.15	6.6257	5.774	5.7042	6.89	4.5193
32020	1.3514	1.283	1.0164	1.8113	1.5281	2.4293	2.2594	72.9674	5.5412	1.865	2.3613	2.1672	2.7801
32022													
32023													
32024													
32025													
32026	0.846	1.854	1.316	1.3821	2.2467	1.9438	2.5874	2.3424	2.328	1.7878	2.2569	2.1419	
32027						1.4106			2.0894				
32028													
32029													
32030													
32031													
32032		0.7278											
32033	16.0778	14.7659	11.2684	11.8443	16.7257	25.6628	31.8016	20.9249	24.3394	17.0323	26.6578	28.7865	25.7165
32034		1.4603											
32035													
32036													
32038													
32039													
32040	2.0493	2.6298	1.3538	1.2707	2.3407	1.3542	1.8994	1.6722	2.5099	2.0329	1.8641	2.0794	
32041	1.8556	2.7476	3.5716	2.9791	4.8913	6.5772		7.0165	4.8541	3.2575	4.4948	5.4418	15.3772
32042													
32043	1.5145	0.9184	1.9806	2.8054		7.7298		1.2735	1.9418	3.4554		1.836	
32044	2.3896	1.8751	2.433	2.3997	2.5526	2.1138	3.7659	3.1107	2.7478	2.2363	2.0819	2.7	
32045													
32047	3.8254	6.4971	2.9989	4.108	5.7319	36.6931	9.782	13.676	13.5389	10.9963	11.5689	10.2064	14.1926
32048		1.0682											
32049	0.7966	1.6858	0.991	1.4152	1.6897								
32050													
32051		0.8837											
32052													
32053								1.0833					
32054				0.6891					1.469		2.302		
32055	8.3951	2.6935	7.9624	19.2376	7.4455	30.2547	40.0966	2.8207	17.5695	4.7187	18.6075	16.6849	54.1198
32056													
32057	1.2772	0.9554	0.9727	1.9405	1.4229	1.1337			1.3897			1.5673	
32058		2.4099	2.3466	2.358	2.1681	2.0308	1.2699	1.864	1.4158		1.9727	2.143	
32059													
32060													
32061	4.6537	3.8113	3.8425	4.2815	4.6209	5.141	10.3029	6.0606	6.8103	6.2862	6.7518	5.8142	5.064
32062									1.2033				
32063	1.3751	1.0913	0.9558	1.3035	1.2535	1.8509	2.8836	2.1475	2.3635		1.766	2.4817	
32064													
32066													
32067	18.5066	21.0666	18.2485	22.4391	21.4379	7.2049	7.1856	13.743	7.4123	9.2489	9.2937	12.777	3.3566
32068	1.3375	1.4586	1.322	1.5172	1.9906		1.3504		1.5437			2.0625	2.9324
32069													
32070													
32071													
32072	1.2538		0.761										
32073	3.8889	4.9765	6.4577	6.1905	7.5477	7.9225	15.3185	9.6071	9.2842	7.9258	12.0612	9.7711	4.9436
32074	1.0556		0.9453	1.2869	1.1394	0.9983	1.292	1.6863	1.3482	2.5301			
32075	11.2907	10.2742	15.459	7.1258	10.5647	5.1474	7.4864	10.011	6.0458	8.6595	10.7204	9.1252	5.5287
32076	3.9269	4.6894	6.8625	8.3115	7.7039	3.1562	1.5051	5.3178	4.2956	2.9074	4.3438	3.0125	2.7719
32077					1.2048					1.7006			
32078	1.3924	0.8688	1.4525	2.0351	1.8358		3.0042	4.9559	1.5954	2.7907	2.4134	2.2983	
32079	2.7826	1.0477	1.2198	1.7507	1.1012	13.2321	4.3098	3.7706	3.0729	2.9977	1.4927	1.5995	6.4784
32080	10.5473	11.3625	14.8722	12.4534	18.1487	2.6035	4.0942	7.0238	7.6246	5.3257	9.0438	9.9564	2.5364
32081													
32082				0.9918	1.1192	1.5284	1.5435	1.6681					2.1344
32083	9.8729	6.761	4.2344	4.3474	16.8025	6.4958	6.8995	28.9827	4.7432	24.3215	12.6553	12.4589	
32084													
32085													
32086													
32087	2.095	0.9555	0.8063	1.4782	2.0978		1.2726		1.7235			1.611	
32088	1.1865	1.7878	1.1657	1.1526	2.41	2.2151	2.7236	3.6834	3.315	4.6398	2.696	3.1193	2.3568
32089	1.2509	1.814	0.8639	1.4969	1.2806		1.4554	1.2017	1.3408			1.616	
32090	2.5736	3.5336	2.822	3.9203	2.852	4.311	4.3515	3.2581	3.745	4.036	3.9806	5.1932	6.0942
32091	6.4231	11.7607	9.1251	10.0828	10.5894	1.4079	2.0464	5.6222	3.4984	2.5004	2.5477	3.5837	
32092	1.9634	1.674	1.2521	2.3154	2.1411			1.3397	1.1644			2.0529	
32093	1.9873	2.4168	2.8568	1.8902	2.2537	1.504		1.8362				1.8028	
32094													
32095	12.6389	11.439	19.8396	20.6106	18.8869	21.0419	35.4671	24.0074	25.0127	21.2144	27.4078	23.7271	18.5402
32096		1.6084	1.0221	1.0997	1.516	1.3326		1.2862					1.6682
32097	5.2443	5.2283	4.4847	5.2482	3.0887	6.8722	7.8891	8.689	7.7639	6.4497	6.1392	6.2534	9.4604
32098													
32099	5.9925	5.5928	66.3527	3.4693	23.6995	4.3727	5.0298		17.7263	4.2373	10.9938	9.2956	56.1335
32100													
32101													
32102													
32103	5.3376	4.6962		3.6185	4.2708	3.2376	2.3725	3.5351	2.094	5.76	4.1861	2.6531	2.7008
32104	11.8921	9.9421	8.7631	10.4682	11.3656	6.4063	9.6036	8.6817	14.769	8.2008	9.838	10.6671	11.685
32105													
32106	1.5758	2.0051	1.433	1.4484	1.948	1.9412	2.0642	1.1604	1.7403			1.4353	
32107	1.5549	1.4533	2.317	1.7722	2.5729	1.9324	4.7674	1.8734	2.8335	2.9347	2.8061	2.2621	
32108	0.9361	1.6922	1.3989	1.8947	2.2834								
32109	0.993	0.8914	1.0798		1.0573								
32110	5.4677	11.2892	3.217	9.068	10.3488	4.8028	9.6985	6.1136	9.1532	8.9926	9.8211	8.1152	15.0608
32111	5.3525	7.747	6.509	9.6322	10.1206	9.0681	2.5905	2.6694	5.1249	4.0525	6.483	5.3067	7.7256
32112	1.3099	1.2189	1.1804	1.7638	2.2696	2.0638	3.1494	2.0501	2.7897		1.625	2.2064	2.7361
33001		0.7066	1.2724	1.1725	2.3229		2.9225	1.3931	2.7964	2.3836	3.7322	2.4163	1.9146
33002	1.8748	1.9851	1.712	1.9845	3.158	4.8207	4.0933	3.8779	6.8602	5.6956	7.13	6.2972	3.0465
33003	1.3334	2.2998	2.619	2.4162	3.2199	2.0325	3.6705	1.8387	3.2059	2.538	3.9148	2.6658	
33004						1.5171	1.9823						
33005	1.2867	1.2013	2.1127	2.6789	1.2249	5.7793		1.9929				1.3935	3.6185
33006						1.1897							
33007													
33008			0.9747	0.9996		1.4671							
33010	5.9352	6.5612	5.4191	7.2887	8.3685	2.033		2.939	2.1516	3.1087	3.1488	4.5899	
33011		1.4859				1.657							2.6303
33012							1.4138	1.2161	1.5452	1.5431			
33013					1.408								
33014													
33015	3.7651	3.2878	3.42	3.4098	3.6537	1.2866		2.3466	1.3038	1.4983	2.1359	2.3709	
33016	2.4034	2.2309	2.0892	2.2173	2.3996	1.5734		1.7904	1.9666	1.408		1.4831	
33017													
33018	13.2071	11.6271	7.2575	13.7196	15.2162	18.369	28.4831	18.3237	21.9467	20.0645	23.2003	23.3965	26.0847
33019	3.9127	8.2639	0.9807	1.461	2.4562	1.2029		1.3294	1.8615		1.7806	1.6661	2.2012
33020			0.768				1.4773		1.5055				
33021													
33022	1.2844	4.5911	1.9533	1.0892	1.9778								
33023													
33024													
33025				1.0319				1.078					
33026			1.5627	37.2514	1.3701		3.2372	4.7051		3.9988		1.8223	
33027		1.7086						1.7997				1.3832	
33028	1.1327	0.7624	1.1513	1.3787					1.1981				
33029													
33030													
33032	17.3394	5.7405	17.7127	16.3827	17.16	24.5438	28.0022	37.4515	30.4469	23.1123	48.2322	50.2548	42.5785
33033			0.6637			1.6215	2.1335	2.2054	2.1212	1.6254		1.8812	
33034													
33035	10.5626	9.6965	8.2035	6.4368	7.0424	2.7428	3.3951	4.9381	2.1857	4.276		11.4015	
33036				1.155				1.1047	1.2596				
33038	2.0815	2.3491	2.2507	3.2395	3.2541	8.2768	21.8097	7.9892	12.8776	9.9035	14.9318	11.5285	8.678
33039	5.9051	8.2594	4.5833	7.4107	6.9508								10.8234
33040		0.9342					3.1509	2.2906	1.8033				
33041													
33042		2.2615			1.2683		1.8073		1.8634	2.6265	2.5273	1.5211	1.9985
33043		0.7475		1.1816		1.4528	2.2672	1.7936	1.8219	1.792	2.2949	1.9184	
33044													
33045													
33046	0.9416	1.9255	1.6037	4.0912	10.4133	6.747	3.3012	11.6821	3.3465		4.8398	2.1509	2.6423
33047	14.3104	15.3943	11.1635	13.4773	20.8629	19.8147	31.6726	32.6097	31.5019	20.1051	22.7138	24.4698	31.0839
33048					1.1857		2.0751		1.5801		2.6419		
33049													
33050		1.0483											
33051	1.2866	1.1115	1.4561	2.3827	2.4528	1.8225	2.0977	1.705	2.2667	1.7712	1.6341	2.4116	
33052													
33053			1.8298	0.8916	3.3481								25.303
33054						1.5264		1.6692	1.1723		1.7321		
33055													
33056							2.0466						
33057	3.2947	2.9865	3.4792	2.113	3.5641	12.1795	5.7741	5.3623	4.3055	5.1523	4.5417	5.0339	3.9467
33058	2.6481	3.1766	2.6394	3.5103	2.8735	3.232	4.9319	3.6205	3.4953	3.0848	3.977	4.1497	3.5049
33059				0.9924									
33060		0.6596		0.8004			1.434						
33061	2.1688	3.4427	2.7832	3.1357	2.7584	3.8748	3.8331	4.0017	4.2245	3.1334	3.8714	3.549	4.3745
33062													
33063			0.7689	0.7997		1.3606							
33064	5.0386	5.7821	5.7072	7.9903	9.374	15.0234	37.4062	19.1009	20.4632	18.6589	22.6867	20.8282	11.2051
33065													
33066													
33067	1.4353		1.6626	4.2209		2.3756	1.7218	3.047	1.9865			2.3835	
33068	23.2484	28.981	34.9134	31.4914	39.7075	34.1679	47.4659	33.9621	31.595	28.156	33.8346	37.5352	19.2968
33069	1.9004	3.3654	5.3753	5.829	20.0962	12.0248	69.1878	13.7689	7.7803	5.1943	11.4594	16.4323	3.2191
33070						0.9789		1.7036					
33071	156.5527	151.394	141.9742	142.0611	160.1371	83.1615	56.133	103.4588	68.7354	69.7443	96.6066	97.3367	56.0954
33072	2.8065	3.7879	4.4705	4.1289	2.8965	1.7397		2.0701		2.4952	1.8334	2.1857	
33073	7.6413	5.7882	5.5423	6.6052	6.5054	2.2221	1.7453	3.5755	1.6617	3.1026	2.4534	3.0868	
33074		1.0104		1.0417									
33075	14.8902	15.6583	10.4438	17.053	15.299	8.85	17.4315	17.5374	20.6144	15.165	17.0156	14.089	24.3352
33076													
33078													
33079													
33080	2.1787	2.7928	3.1072	3.6703	2.1546				1.5622		1.8646	1.35	
33081	14.4537	8.5621	5.8923	6.5838	9.8327	32.3914	34.0335	18.9019	26.9803	24.4348	27.7785	19.0579	22.7563
33082	0.9017	1.2035		0.7048	1.1332	3.1013		1.2662			2.3835	1.542	
33083	1.03	0.8762	1.5291	2.7051	1.5985		2.1659	1.2323	1.5152	1.8755	1.6555	1.5947	
33084													
33085													
33086	1.4105	1.6971	1.5798	2.3857	2.0679	2.028	2.6207	2.065	1.9984	2.0141	2.3098	2.5261	1.9639
33087	2.4472	3.7563	2.0389	3.3104	4.1454			1.8236	1.5012		1.7266	2.3607	
33088		1.211				1.7403		2.6118	1.9273	1.9316	2.9567	1.3668	2.3805
33089	4.9686	8.0974	1.7399	10.4264	6.0029	14.6831	8.8071	5.7248	11.8811	4.6212	8.8915	9.2996	39.8349
33090	3.1408	2.3969	2.9187	4.3342	4.1988	3.5626	7.5986	6.4763	4.6934	3.9915	3.4414		2.2879
33091			1.1275	1.1674	1.5556	1.8413	3.0667	1.9823	2.0844		1.6488	2.0492	2.8213
33092													
33093		0.9068											
33094	1.2047	0.8257	1.2269	1.7624	1.9661		1.269	2.179	1.9493			1.1985	2.668
33095	1.5077	2.606	1.6202	1.9226	1.6622	3.1055	4.1335	1.6017	6.4089		2.5781	3.4072	5.2846
33096		0.7014	0.9536	0.9798		2.3421	3.1122	1.3405	1.2494				5.1661
33097													
33098													
33099													
33100		0.8453	0.9211	1.2156		1.3742		1.5195					
33101	1.1007	1.5707	1.9935	1.529	2.1098			1.3808	1.6427				
33102		0.8116	1.3204	0.9411									
33103	1.9329	1.7584	1.9307	3.6611	2.1219	3.574	2.615	2.2582	3.1649	2.1307	2.4705		3.6397
33104													
33105													
33106													
33107													
33108													
33109	4.6123	5.5698	6.2435	5.8399	6.5489	6.3999	9.7956	8.6863	6.0652	7.2366	4.9372	6.9997	16.9773
33110	3.3107	1.5227	8.5991	6.4318	12.1897	4.0173	16.8381	4.4099	7.7606	6.3987	4.6327	5.2157	3.1097
33111													
33112	1.2247	2.4582	1.6669	1.6318	1.6816	1.1575	1.5284	1.4119	1.5464		1.7268	1.4534	
34001													
34002	0.9835		0.8272				1.9917						
34003	2.413	2.7956	2.5437	2.3796	1.5105	1.0784		1.6789		1.1502	1.582	1.4858	
34004	1.0779		1.0799	1.438	1.6281	1.1257		1.5818	1.5101	1.3328	1.5811	1.6648	1.7286
34005	4.2676	8.7864	9.3614	9.8115	9.1804	19.2976	11.543	18.9827	13.5828	10.2494	14.8711	10.2739	68.7558
34006	1.1303	0.8514	1.1969			1.5904			1.4564	1.9841			1.9828
34007		3.1812	2.1958	3.0687	5.1386	4.2518	4.8497	4.862	6.6204	4.3731	6.4232	5.1939	9.1937
34008													
34009	1.3465	1.9822	1.5516	1.9981	2.0406	2.3431	3.4323	2.7428		2.2407	3.6094	2.4472	2.0265
34010		0.8546	1.0679			1.4372							
34011	6.3873	7.5446	4.3187	7.3819	4.5723	7.3448	5.6904	5.7072	7.3655	6.7377	6.9681		11.4558
34012													
34013	9.0745	6.8481	7.321	10.2356	10.4598	13.2399	15.2814	8.4182	6.254	8.6941	13.4829	11.4506	22.1462
34014	10.6911	15.3695	17.2996	16.5286	23.9845	29.4567	41.9088	28.6865	29.1645	25.5966	28.5488	36.4305	18.1858
34015													
34016													
34017	2.2073	1.3885	2.9724	1.518		1.0096	1.6101		1.4687	1.645	1.9111		2.1145
34018	1.2192	1.7492	1.6623	1.2395	2.1027	2.5188	2.2056	1.4172	3.1175	2.7171	3.4929	1.8988	2.8814
34019	6.9718	14.9653	6.5775	5.9495	12.5239	50.1898	16.5181	22.6803	27.5488	22.4721	31.7331	27.7478	203.0678
34020	15.7141	15.5995	14.2693	16.8265	14.9301	39.2862	30.9789	26.0552	28.0383	21.7205	27.2144	31.2882	56.2722
34021					2.6609								
34022	2.693	3.2118	2.8963	3.4556	4.2237	4.9375	5.2773	4.1371	4.5564	4.154	4.1671	4.8889	2.6654
34023													
34024													
34025	3.4709	3.348	5.751	5.1906	3.5117	2.4077	1.7951	2.1615		2.509	2.7266	1.7119	10.5189
34026	1.6965	1.9513	1.502	2.1434	2.3105	2.9171	3.1507	3.8998	3.6058	2.9704	2.875	3.3158	2.171
34027			0.9307				1.4954	1.2128	1.1284		1.5805		
34028													
34029	1.7483	1.3486	1.9012	2.7302	2.4542	2.6196	5.5198	1.5525	2.7484	2.1964	2.6032	2.643	2.4871
34030													
34031													
34032	3.6088	10.5677	1.7565	2.9918	4.7774	4.3373	2.5778	4.5466	3.2124	3.3577	3.4708	3.238	4.5385
34033	17.8861	26.5578	11.8528	18.8463	17.9138	63.3968	43.3392	56.6304	46.2717	51.9229	60.1797	43.9401	230.2681
34034		1.0251		1.1699				1.454					
34035													
34036	1.166		0.779			1.4809	1.3315						
34037													
34038	2.7717	3.5844	3.5018	4.7031	5.2266	4.1344	7.3787	6.5581	6.3024	7.5355	6.9675	5.3005	6.7755
34039	1.7172	2.1238	1.36	3.0859	1.7601	1.9893	3.1588	2.1319	2.3635		2.2606	1.7609	
34040						0.9974							
34041	1.1955	1.1668	1.0147	1.2566	1.9781	1.9788	2.341	2.0447	2.1357		2.2401	1.691	2.1766
34042	2.7697	4.7453	2.7255	2.8108	2.8467	3.7179	5.9792	4.5922	3.5194	3.3697	3.6511	3.5075	
34043						1.3051			1.2219				
34044													
34045	2.3207	2.656	2.1681	2.0701	3.2497	4.5897	3.6251	4.2913	4.4846	3.2428	6.1983	4.6725	5.8787
34047	1.4621	4.2803	2.0082	2.416	3.2313	4.0874	3.2424	3.2118	2.641	2.6708	2.2232	2.7954	3.2385
34048		1.4763	1.4477	1.6322		4.496	3.3812	3.5486	2.7641		2.2953	2.1512	7.9041
34049	0.969	1.4489	1.5442	1.0968	1.5825	2.5978	3.1728	2.9055	1.7302	2.6263	2.4018	2.4952	2.2823
34050					1.1283		1.3515			1.9997		1.4502	
34051	2.6603	5.367	2.2116	3.5068	4.1678	8.9362	7.4426	9.073	8.1412	6.6612	10.4859	8.0758	4.7071
34052	2.8659	1.7502				7.1163	3.2623	4.9812	4.6765		2.3455	2.6964	
34053	3.7728	4.5083	2.9619	2.3723	4.0401	3.5814	2.6964	3.0659		3.8949	3.3936	2.6348	4.6528
34054	1.7382	1.1478	3.1458	5.0929	7.6599	1.5587	6.4461	3.9752	5.5965	3.9699	3.399	5.3472	2.8269
34055	3.738	5.3887	3.3578	4.6765	4.3787	3.3613	3.5501	3.9941	3.5658	3.8556	2.844	2.5739	
34056													
34057	4.8656	5.9975	5.1726	6.117	7.2783	9.7607	13.5042	11.2999	11.2863	8.7282	10.792	11.0141	5.404
34058													
34059	2.7222	5.5514	2.5873	3.2987	4.1277	1.408	2.1413	1.7861	2.7687	2.6172	2.7592	2.3825	2.3516
34060	4.6304	5.4945	2.7475	3.4754	3.3244	11.4166	6.4007	7.7744	10.7031	9.2289	9.0995	7.5447	4.3849
34061	1.2083	2.0014	1.1517	1.7963	3.2675	1.7147	2.1369	2.1701	2.5494		1.8715	2.4891	
34062	2.7234	8.2282	2.0669	4.0464	5.6063	10.0603	8.4267	15.2604	10.2334	9.2298	12.8699	9.4642	40.5865
34063			0.8304	0.73		2.1318	1.9366	1.9114	1.94	1.8957	2.2673	1.569	
34064	1.8491	2.7731	3.3127	3.6175	3.3581	4.3664	6.3358	4.3407	4.298	3.874	4.5929	4.2578	3.0808
34065													
34066													
34067		0.9118											
34068	43.3425	30.0228	29.0736	40.3305	51.6081	49.4613	47.567	37.414	66.5168	51.1931	58.1886	64.8519	98.2087
34069	1.3371	1.2734	1.1441		1.3627	1.4338							
34070		1.6793	0.7629	1.5057		1.8297			1.4119	2.0804			
34071	28.1135	19.2418	72.1668	26.7694	30.1783	71.9877	44.3475	53.0018	44.9113	55.3692	50.5006	42.4298	136.4796
34072	1.0737	1.1751	1.3014	1.1755	1.6394	2.1687	2.3834	2.0896	2.4858	2.6096	2.3815	1.848	
34073	4.1596	1.5471	6.2749	6.0742	4.002	9.1327	24.3372	7.5372	12.4257	7.7366	6.2679	4.599	10.9878
34074	3.5426	3.8536	1.4945	2.1523	1.8685	1.4554	1.9747	2.3797	3.0859	3.2875	3.5523	2.4901	3.3533
34075	2.2629	1.9309	2.4919	1.926	2.9651	1.2401	2.21	1.6961	2.5657		1.7251	2.1381	
34076													
34077	3.0894	3.3434	3.4208	3.7697	4.3698	4.8517	5.7497	4.8281	4.7515	3.9286		5.0609	
34078													
34079													
34080	3.0895	6.1017	4.4614	2.1533	3.3412	4.9564	2.9753	2.0644	2.9397	8.4296	4.7603	3.9274	9.7064
34081	2.0527	3.7431	1.5315	2.4937	3.3024	1.7819	3.1413	5.2316	3.032	3.7975	3.4518	3.3397	3.3796
34082	3.0434	5.9867	51.5622	39.3268	19.6436	17.4847	15.5118	5.952	12.8839	8.8059	18.0163	17.9797	74.916
34083	7.3264	13.1491	6.2862	9.1601	9.3201	33.8491	37.4344	48.3483	30.1272	24.533	31.4441	32.2558	11.5869
34084													
34085													
34087			0.8412			1.3841	1.4016	1.2323	1.1661		2.1438	1.4833	1.7162
34088	2.1509	3.4244	3.9289	2.7222		4.1888	2.8303	4.6184	4.6312	4.203	3.796	3.3883	4.9173
34089													
34090	1.0597	1.3011	1.436	1.289	1.2518	2.056	1.4517	1.6287	1.2696			1.7519	1.9276
34091													
34092													
34093	1.5037	2.0312		1.7157		1.6801	2.3561	2.4864	2.7988	2.8893	3.1555	3.0052	1.7729
34094	18.4894	14.144	14.7067	17.1411	22.842	13.7378	11.3367	24.5808	10.0166	11.6368	19.6174	13.0969	19.0277
34095	1.5423	1.4418	1.0692	0.9484	1.0658				1.3509				
34096	18.7597	24.2234	14.6737	25.3219	30.1678	35.9174	54.1333	102.2187	48.65	30.3601	35.063	35.4273	29.7312
34097													
34098	5.294	5.0487	6.1369	8.2172	7.0636	8.2048	10.4605	9.1088	6.4598	5.8924	6.1233	10.1866	4.742
34099													
34100													
34101													
34102	0.9515	1.9765	2.201	2.4162	1.8069	3.9232	2.7284	4.3405	1.8488		2.3837	2.1739	2.0422
34103	28.4825	32.1311	8.2301	26.1115	20.0221	24.9182	39.9107	40.1908	35.6867	41.8336	35.2679	37.252	30.7613
34104	4.1593	6.5506	18.7917	6.9446	21.1715	33.3796	41.5895	29.3749	23.6246	3.1689	32.7868	24.0794	20.4216
34105													
34106													
34107													
34108	0.8581		0.6753	5.7232				1.1781	1.5496				
34109	10.657	4.7078	4.7598	6.8481	9.8001	5.2899	6.0146	5.3012	7.9841	4.8486	6.6471	6.3106	9.3322
34110	17.9015	22.3309	10.1173	17.4248	28.8008	33.7999	33.2087	36.2435	21.1398	30.8221	28.4635	37.4547	41.5679
34111	1.5362	1.7182	1.1834	0.836	1.9217	1.0209	1.49	1.558				1.4555	
34112													
35001	0.822		0.8098	0.7782									
35002	8.8414	12.0918	2.4912	2.1499	6.4891	25.2572	10.6724	27.2259	12.3007	19.5741	19.8994	11.5168	25.6874
35003				1.1735			1.4654	1.2281	1.2476	1.7585	1.6267	1.9334	
35004		1.0795				1.4051		1.6624					
35005		1.5391	0.882	0.8076	1.3039			1.7911	1.1721			1.409	2.7989
35006	2.0263	2.7918	2.2337	3.3296	2.3816	2.3588	2.674	4.5792	2.9859	4.0621	3.3845	2.965	
35007													
35008													
35009	1.4939	2.1489	2.6472	3.5114	2.931	2.2859	4.3132	2.967	3.9817	2.1478	3.9904	3.7214	2.3797
35010	1.2191	2.8487	1.4681	1.8484	1.8072	1.6808	1.8547	1.4642	2.0699		1.7559	2.0001	
35011		0.9287	0.9245	1.2308	1.4084	1.9578	1.4733	2.1156	1.3828	1.585	1.8949	2.152	
35012													
35013													
35015													
35016	6.3224	10.3773	4.4436	5.0189	5.5783	3.4772	3.2726	3.5359	6.7751	5.6548	6.1089	4.3532	5.3646
35017				1.3422		1.9707	1.6249	2.4353	1.8171			2.1392	
35018													
35019	11.8322	12.2678	12.6837	15.119	19.3728	23.1853	24.5027	22.5624	22.811	20.8549	22.1094	22.7162	10.3148
35020			0.751		1.1296		2.1457		1.7775		1.7496		
35021													
35022	5.4338	7.3778	7.1142	7.8316	9.0915	9.2516	10.1765	8.6399	8.9247	7.8861	10.3865	9.7094	7.1072
35023			0.7425					1.1977	1.1139			1.6935	
35024													
35025													
35026	5.4694	4.7608	4.9615	6.1155	6.4135	7.0604	9.2492	9.1806	8.0033	7.0636	7.281	8.0209	4.3219
35027	4.1514	4.1576	3.9373	5.7748	5.4707	2.7067	2.7357	5.4461		4.6853	3.4229	4.5625	3.9631
35028							1.411						
35029		1.1613	0.8752										
35030	1.1745	1.3116	1.3126	5.6905	1.5049	1.7493	9.0066		21.7862	1.6303	1.7873	2.4788	
35031	3.117	3.1456	5.2055	4.0361	4.665	6.7901	9.5718	5.8861	6.8144	6.2123	7.4953	5.7849	3.6239
35032													
35033						2.806	5.5256	5.0587	2.1062	2.3556	4.257		
35034			0.7745			1.2677							
35035	2.6911	4.0748	5.1365	8.623	5.0817	4.2674	5.9437	5.7217	3.2688	2.9681	4.0323	5.6388	
35036		0.7339											
35037				0.8848									
35038	1.0572	1.2635			1.1649	1.1725			1.7685	1.4712			
35039	2.8156	0.9805	3.3454	2.8482	3.2896	1.082		2.3584	1.2299		2.4255	2.4712	
35040	0.8292		1.1812		1.7534		3.2598		2.9381	2.0087	2.2309		
35041													
35042													
35043													
35044	21.52	33.0156	29.6635	41.7331	33.2625	50.6501	85.565	61.7562	79.3144	56.6758	64.8872	50.564	113.4859
35045						1.1224		1.4186					
35046	0.8461	1.3469	1.1082		1.227								
35047	8.7187	13.7529	12.1372	12.6596	14.9893	13.7312	22.0196	16.4839	15.2328	12.1491	13.8061	16.672	9.4868
35048													
35049			0.9387										
35050													
35051	7.9854	9.6999	8.0385	11.8184	12.3693	12.5001	8.1399	11.0087	11.8105	15.0502	8.1325	6.6401	9.408
35052	9.7582	1.0139	13.4995	10.6457	12.8845	1.6641	3.9384	1.9434	3.7067	8.3574	6.7862	6.522	5.3327
35053													
35054		0.7876	0.7948	0.9572		1.9056	2.5622	1.6742	2.1667	1.8466	1.9967	1.5593	
35055													
35056													
35057		1.2657											
35058	1.1738	2.3036	1.3707	2.2685	2.0679	2.3993	3.5993	3.3272	2.6918	3.4458	2.6274	3.1903	4.0405
35059													
35060													
35061			0.7333	1.1901	1.7259	1.1444	1.752	1.7137			1.712		
35062													
35063	1.0721	1.0335	1.3808	0.9866	1.5144	1.0812		1.4925			1.7925		
35064		0.8459	0.9035			1.3682							
35065	8.6062	10.7915	9.8531	13.8557	13.6689	20.6375	24.466	18.7926	16.9977	15.0234	16.6396	20.3885	8.0707
35066	1.7047	1.8529	2.0098	1.8956	2.1333	1.9848	2.8594	2.6584	2.8717	2.0925	2.7748	3.1487	3.2873
35067	2.5721	3.116	1.5437	1.6166	2.861	4.7388	4.6245	5.5984	3.8858	5.0147	5.2134	4.8488	5.9264
35068			1.0782	0.8802	1.2553	3.6346	1.215	1.8362	1.6232		1.605		3.5365
35069					1.0877								
35070													
35071	1.02		1.3698	1.1566	1.3178	3.3516		2.1691	1.6181			2.1546	
35072	8.5657	5.217		1.515	1.8458	1.7063	1.9292	3.2255	1.558		7.9616	5.459	
35073		1.1818		2.181		3.4034							5.8199
35074		1.4251							1.5452				
35075	6.8217	9.0211	9.1232	12.9682	18.6468	15.7373	18.188	16.925	10.8001	13.6501	23.2309	13.1188	18.7633
35076	36.6208	59.405	20.8154	31.3376	44.2503	69.4656	71.3154	115.8863	73.2133	90.9259	78.0853	79.2934	131.8963
35077													
35078													
35079	1.015	1.5011	1.1579	1.2679	1.4639	4.6971	4.1348	6.0951	6.3549	4.3662	3.5108	2.9181	6.1413
35080	56.3772	66.511	53.9251	98.6843	88.2072	179.8693	187.169	156.0037	128.964	164.4782	183.7211	151.9867	662.5106
35081		0.9988	0.7245	1.1703		2.1631	1.9456	2.4278			2.12	1.4909	
35082	74.2117	70.9677	74.3551	59.883	81.5177	37.13	32.4562	48.9242	35.4305	45.3877	49.12	68.624	24.4627
35083		1.2548	0.7548	1.0846	1.0787	1.1123						1.6013	
35084													
35085													
35086	4.502	5.1027	3.1008	3.5506	3.7763	9.1276	5.213	7.3355	8.2523	7.3132	6.682	6.5819	12.3524
35087	56.0495	48.9518	100.3003	129.0969	88.6631	118.2171	211.1095	107.1444	127.8004	119.1022	205.4587	150.8352	315.903
35088	17.0923	17.0725	16.0705	13.1273	15.6134	6.5438	5.8376	9.7275	6.2013	7.088	7.0173	10.6476	4.0111
35089	1.5391	1.6135	1.7954	1.8622	2.2696	1.4142	1.5802	2.2229	1.9493		1.6192	1.7079	
35090													
35092	0.8539		0.7927		1.001		1.2148		1.2544				
35093		0.7684	1.1412	1.4585				1.1979	1.3703				
35094	0.9533	1.679		1.0732		2.0159	1.5993	2.95	2.3551				3.591
35095													
35096	2.5473	3.4676	7.5411	3.1077	4.2623	2.1438	2.565	1.9989	1.5935		2.3379	2.4763	
35097													
35098	4.2452	4.0749	5.0875	4.8827	5.0029	7.2573	10.2763	9.0436	6.8799	7.1349	7.8482	9.0168	4.5803
35099													
35100		1.2945							1.2968				2.1409
35101												1.8975	
35102	1.7018	1.7913	3.7634	1.2468	2.1646				1.392				
35103	3.5239	3.9581	2.0426	4.0273	3.5886	2.5237		11.6027	6.0895	6.5022	2.8833	4.607	3.4349
35104	3.7342	4.2761	4.1932	5.2936	5.2268	6.2171	6.2081	5.8686		4.1175	4.5452	5.4418	2.9237
35105													
35106	1.4308	1.5006	1.3587	1.8793	2.1478	1.7976		1.6756				1.9302	
35107	1.8107	1.8104	2.0253	1.9245	2.5082	2.2859		1.3131			2.0333	2.3566	
35108													
35109			3.0232		1.9891	3.2643	1.5903	12.9609	4.0748			2.7067	7.8193
35110		1.3107				1.8286	1.4809		1.0187				
35111							1.4507						
35112	1.2139	2.818	1.0267	1.3465		2.4595	1.6418	1.6842					2.6734
36001	0.8347		1.0657	1.0064	1.3081		1.3394	1.4243	1.2195		1.6463		
36002	28.2323	41.314	36.4066	46.0567	47.5595	40.2081	55.8139	48.0856	46.3786	39.3809	56.2642	57.5206	35.317
36003	14.0033	13.0123	19.5885	29.9638	9.7368	39.1889	22.4706	41.6285	70.9226	8.9272	18.5447	26.5821	20.4271
36004	23.0274	25.3583	16.0958	30.0875	40.6729	58.6608	80.2583	73.3496	67.8193	66.0467	74.7076	69.3756	114.8688
36005		1.356											2.0503
36006													
36007	57.4685	58.5499	66.452	57.6584	72.2169	32.4679	27.0001	48.3141	30.1941	35.298	45.4885	51.7468	14.7763
36008						1.0878							
36009													
36010	3.4487	10.875	5.517	1.6319	11.904	3.5432	6.0592		2.5545		4.375	4.6918	6.3591
36011			0.8637	1.1172	1.5217	1.6043	1.8632	1.941	2.3114		2.6817		
36012													
36013													
36014													
36015	12.2567	16.6479	47.7974	18.7433	18.3693	8.9148	6.3484	11.0324	11.5478	10.6154	14.8362	15.8524	6.297
36016													
36017	22.9276	11.1968	11.8894	14.9353	13.7124	16.714	13.1918	14.0957	23.2254	18.7388	29.2096	14.6397	66.9392
36018	2.0481	2.139	1.9531	2.6489	2.7046	3.4298	3.7758	5.0568	3.2995	3.1033	2.8672	3.0399	2.8814
36019													
36020	1.9613	2.1274	1.905	1.8357	2.8347	3.3479	3.6487	2.8308	3.7378	3.1466	3.5924	3.863	
36021			0.6422			1.0348							
36022													
36023													
36024		1.4414											
36025	6.3076	9.0852	4.9206	7.0123	8.5205	9.6558	15.7066	21.073	13.6859	7.1487	13.536	12.5632	32.0198
36026	19.1904	20.2619	17.6843	17.3016	19.357	7.6204	5.287	11.9518	7.739	8.9106	9.1	12.8883	3.888
36027													
36028	6.1369	6.1912	7.4251	8.5767	8.5423	7.7154	11.3829	10.2731	8.3559	9.2386	8.8873	9.9586	4.0379
36029			0.7629										4.2491
36030		1.4185				1.1419							
36031	2.7989	3.2965	0.7946	1.7316	1.9488	3.6975	1.6557	12.6502	2.7456	1.7921	1.9407	2.1108	3.9126
36032	1.1742		0.7018	1.141		1.7644	2.2721	1.5095		1.5112	1.9206	1.9987	1.8104
36033													
36034		1.6497				1.1187							
36035													
36036													
36037													
36038	4.8148	5.2218	3.5961	6.1294	4.8667	9.4237	7.6476	9.7509	8.7308	9.6237	7.3363	7.6137	7.8487
36039	1.2683	1.1491	2.3942	3.5556	1.655	5.5804	4.0809	3.189	5.812		2.5767	2.5827	3.8152
36040		0.7214											
36041													
36042	3.0494	1.8573	1.3628	3.022	1.8786					1.2838			
36043		0.9099	1.0599	1.3554	1.193	2.0611	3.5165	2.0147	2.6732	2.0198	2.7214	2.6145	2.7685
36044	8.8347	10.999	10.381	11.6875	13.1519	15.7906	21.3067	17.4674	16.9562	14.7598	15.777	17.5335	9.1107
36045				1.5455		1.5536	2.3925	2.4054					
36046				1.8879			3.9056	1.3587	1.778	1.862	1.6026	1.4848	5.0584
36047													
36048													
36049	2.1037	2.3766	2.2395		2.2821	3.6446	4.7529	3.5419		3.3798	3.7391	4.4163	2.1775
36050		1.2392						1.1073					
36051	1.032	1.2256		1.2055		1.7842	1.3932	2.6915			1.5224		
36052	1.5075	5.811	0.9298	2.4934	2.5217	1.891	3.7282	3.1888	3.3088	3.5095	3.248	2.6663	
36053	1.667	2.0962	1.0277	1.6035	2.5793	4.6341	2.6871	3.5794	4.112	4.9399	4.8644	4.3653	8.986
36054	1.9318	1.0446	6.3545	3.6497	9.5462	4.1281	20.561	4.0984	19.6356	11.8091	14.8545	9.7404	3.4846
36055													
36056						1.3027							
36057													
36059	13.3187	13.5975	8.7749	12.9745	14.3408	15.9263	27.6987	23.5813	22.5436	9.6393	25.6596	23.7918	33.3459
36060	19.4575	18.757	23.6481	24.7417	23.4044	21.1291	26.933	25.731	24.3909	21.9669	17.233	21.4321	43.6798
36061	14.7273	5.6207	6.3984	5.3824	11.3118	12.7407	16.1857	19.0565	15.8734	14.4493	25.4559	14.1613	5.0053
36062	1.5763	1.6062	1.5107	1.579	2.0438	3.2529	3.5947	2.6742	2.3687	1.6563	2.6094	2.8356	1.7786
36063													
36064													
36065	1.1064	0.8653	1.1748	1.0626		2.0386	1.9825	1.8186	2.1248		1.5988	1.6225	
36066													
36067													
36068	8.0699	8.638	10.6501	9.1291	14.7873	15.726	29.5902	14.5266	15.6135	14.3196	13.8129	24.0062	9.7011
36069													
36070													
36071												1.7814	
36072													
36073	5.5921	5.0465	4.3585	4.7546	4.0159	10.704	5.8907	9.6887	6.4291	8.8962	8.0202	5.2928	15.4915
36074	7.8814	9.042	12.4984	10.7064	9.7675	8.5339	13.6653	14.1208	16.9413	9.6271	18.3975	9.525	23.4602
36075													
36076													
36078	1.3963	1.6774	1.6877	1.5437	1.6735	1.3599		1.5434	1.4525		1.4311	1.9018	
36079					1.0684								
36081	7.3579	11.221	9.0076	6.8279	10.0321	44.6348	15.293	27.5265	20.2168	29.5505	25.4151	14.2911	25.5333
36082	1.2386	1.083	1.391	1.7718	1.2473	1.637	2.5778	2.283	1.9982	1.6967	1.7666	2.1347	
36083													
36084													
36085	1.1546	1.2788	1.7142	1.5893	1.9558	1.9994	5.3827	2.2722	2.9725	2.1979	2.5488	2.7535	1.8336
36086	9.3918	8.0746	9.2293	10.2378	13.0824	13.1025	16.7096	13.3524	13.7448	13.8547	20.1943	17.1519	10.0223
36087	49.4923	42.0196	56.9548	62.4649	62.9865	81.6048	87.9226	108.4983	69.3751	112.8381	84.2019	75.346	255.0032
36088	7.1918	8.6141	10.2159	12.7623	12.401	18.8227	14.794	11.6153	10.7197	9.8599	11.2922	10.1006	
36089													
36090	7.6776	6.8191	7.4298	8.508	9.8627	12.2921	16.0484	12.3002	11.5143	10.3634	11.229	12.0481	6.0947
36091		0.7798											
36092	3.8884	4.9195	4.3684	4.7946	3.4154	7.7954	11.4916	8.4991	8.0966	7.2685		5.3632	18.2449
36093	1.0405	1.5197	1.4578	1.3551	1.9045	1.4018	2.483	2.1967	1.7789		1.9987	1.7726	
36094	2.2513	1.324	3.1975	2.0658	1.5762	4.0853	2.2953	2.6312	2.1486	2.1379	2.4326	2.5243	3.5065
36095	3.1405	2.87	2.2675	1.5403	3.6633	5.6773	6.6311	3.6318	8.5274	6.4292		6.3624	7.1127
36096													
36097	9.3594	10.4328	13.1906	12.5658	12.0809	14.5155	17.1614	13.6564	12.6393	13.2262	15.5448	13.3044	7.5894
36098	5.9844	6.3784	8.3568	7.9929	10.1979	23.634	15.0104	13.9213	11.2152	11.1129	12.6816	11.7094	5.8837
36099	0.9953	1.111	1.1905	1.0967	1.2795	1.374		1.0105	1.3065			1.724	
36101													
36102													
36103													
36104	1.088	1.0934	1.0015	1.2673		1.6185		1.4448	1.1066			1.9434	
36105													
36106	15.5252	17.365	17.0372	10.1297	19.2319	20.1575	16.458	19.7401	18.5325	19.0862	22.8843	15.4032	23.4407
36107	3.2172	3.9159		1.9552		2.566	3.4795	2.3098	3.0607	3.8477	1.9754	2.3513	10.7482
36108	11.7375	9.3677	13.9408	12.268	12.984	11.0815	11.2564	13.7055	17.4048	14.1897	12.4198	10.6392	31.9825
36109	1.5475	1.6657	1.4328	3.8111	1.9116		2.3921	1.5375	2.7608	1.8815	2.3609	1.7629	4.1272
36110		0.7714	0.715	0.8911									
36111													
36112			0.6855	0.9503									
37001													
37002	2.9613	4.5132	3.124	4.2986	2.8867	4.1042	2.2196	3.138	3.7933	3.1727	3.239	3.3638	8.4154
37003	4.7585	6.7002	8.2105	6.5092	7.6503		5.6431	2.1698	7.5669	7.6818	5.1089	4.6127	7.1043
37004	1.5913	1.672	1.6163	2.1576	2.2592	2.2615	2.3171	2.9062	2.2115	2.2082	2.3922	2.4885	1.8801
37005	1.2254	4.0811		1.164	1.6004	1.2958		2.1245	1.3866		1.8794		
37006	0.8574												
37007	1.4554	1.6738	1.3098		1.2193	2.6113		2.2413	2.0045	1.7752	2.136	1.422	2.9419
37008			0.7609	1.082			2.2676	1.6984	1.9006		1.9579	2.0704	
37009	1.8875	0.7494	2.2474	4.4897	2.7894	2.2199	7.0376	2.0473	3.4165	3.8065	2.9635	2.8095	2.9168
37010													
37011			1.0159	1.7827					1.2832				
37012		0.8998						3.8428					
37013	2.6133	3.2358	1.8596	4.0379	4.4448	3.3488	2.2484	4.7431	3.1042	3.4245	3.9539	4.0094	
37014	5.5216	6.1381	3.6031	5.5048	4.7943	8.188	4.2477	9.7765	3.8153	5.2308	5.6262	5.8915	5.626
37015	1.2574	1.5413	1.2858	1.3482	1.7197	2.4458	1.9967	2.3243	2.8759	2.738	3.0906	3.0136	
37016	2.4267	2.2771	4.3222	4.8039	6.5443	11.5109	12.248	6.8694	8.0973	8.4202	9.9457	6.1676	7.7161
37017													
37018	0.9848	4.2501	3.2603	5.3768	2.7487	2.548	4.2013	4.4357	3.715	2.6998	4.0288	1.5027	15.3251
37019						0.9839							
37020	1.0888	1.251	1.6796	2.0341	1.3395	3.6318	2.2829	5.2732	3.0141		2.2066	3.5603	2.9838
37021	6.4546	5.8369	4.3238	8.0907	6.8062	7.672	11.8031	15.426	10.5054	8.3473	10.4885	8.8659	12.9108
37022													
37023	2.6804	6.0702	5.7916	8.6994	5.9233	7.1531	3.3609	5.9145	5.132	5.8156	5.9943	4.8918	34.4493
37024			1.0248	0.9378	1.6086	3.1618	2.6129	16.9649	3.4926	1.3388	3.1278	2.9564	2.8313
37025			0.7497	1.0119									
37026	0.8326	1.0941	0.7425				1.5761				1.7989	1.5341	
37027	14.3937	20.1511	10.5553	15.313	12.4802	9.9087	29.9439	13.375	21.7514	28.0908	21.3682	24.5007	21.3675
37028													
37030	0.8714	1.8299	1.6418	2.2953	1.8253	22.6324	4.9093	7.6293	3.1997	2.3368	3.7291	3.1692	
37031			0.7872	1.0289				2.9916					
37032								1.1393					
37033	5.1445	4.6113	3.2111	7.6313	4.7366	3.7828	5.2496	2.4611	6.0464	3.469		3.7877	7.1826
37034	2.567	2.3928	3.6066	3.4208	5.1264	4.0151	8.3579	5.2346	6.1685	5.007	6.5916	5.2056	3.7604
37035						2.125							6.8816
37036	11.7368	11.9319	12.3932	13.584	17.2878	6.5283	6.4057	11.0811	7.4975	8.0568	11.46	14.9304	3.5414
37037	1.0594	0.8721	1.1284	1.0771		2.2643	1.5997	2.6117	1.8799	1.7063	2.5099	1.9669	
37038	2.4109	2.5386	2.5596	2.8684	3.6487	3.9045	4.9992	4.9383	4.7632	3.2484	3.9727	4.7224	
37039													
37040													
37041			0.7441	0.9663		3.2545			1.571				
37042		0.9068	0.8314	1.1173	1.4302	2.1094	2.2942	1.9288	2.1351	1.5399	1.9121		
37043													
37044	1.3713	1.6359	1.3939	1.0834	1.6696	1.9353	2.3463	1.8799	2.1683	1.7061	2.2424	2.1838	
37045		4.7555		2.961		3.6009	5.8048	4.3443	5.1702	4.7487	2.7956	3.2808	5.2966
37046	4.0311	6.0427	4.3407	9.5535	7.7378	3.6929	7.143	6.2857	4.0925	2.9916	3.3182	4.6253	
37047	3.9592	3.6201	6.9333	5.7903	6.6402	15.1683	16.612	11.6586	15.0304	11.0968	16.0126	16.9139	19.3147
37048	1.1944	1.1009	0.8263			2.8532			1.6412				2.1932
37049	5.3732	5.321	2.8532		4.8483	5.1116	6.1041	7.1737	13.9094	6.7808	8.5914	7.7269	11.0111
37050													
37051						1.8975							
37052	1.6769	1.7792	1.5269	1.3001	1.9607	3.1639	2.927		2.9599	2.6736	3.2031	2.9812	
37053	3.4479	4.3428	4.8199	5.4844	5.4651	9.1797	5.7556	6.1385	7.8453	5.0261	6.5875	4.8048	7.8807
37054													
37055	17.4745	15.9923	16.7969	18.9969	17.7877	13.4454	14.609	11.2695	12.4587	11.2587	16.8345	12.5245	3.1423
37056	6.2963	6.6139	8.7848	10.4933	9.0116	12.4914	7.6741	8.4634	6.0417	5.74	4.5289	5.9054	7.057
37057													
37058	1.0302	1.4859	1.2851	1.5521	2.1334								
37059	1.6687	1.1549	0.9867	1.6487	2.345	1.4825				1.677		1.7428	
37060	12.3188	17.9564	3.4108	13.2078	20.8829	12.0415	17.806	28.8011	17.0574	11.1469	11.1747	11.4325	17.4541
37061	4.2764	2.8097	3.3257	4.3954	4.273	19.0022	9.4119	9.5338	10.1381	9.8103	12.5645	10.1978	19.1598
37062													
37063	3.8825	4.5303	4.4962	2.5734	2.6008	6.1222		1.2532	2.7512	3.0847	1.931	2.2324	3.8703
37064	1.7746	2.1913	2.026	2.503	2.7681	3.6516			3.1886	2.7479	3.3664	3.2683	
37065	1.1857	1.165	1.6146	1.3974		2.4618	2.1429	1.7624	2.2533			1.6031	
37066						1.2956							
37067	1.2685	0.9506	0.829										
37068	3.8654	3.5998	6.6743	5.0324	3.3287	6.0065	6.0724	2.6768	6.2064	5.3141	4.0199	4.9991	8.5313
37069	17.8714	43.2772	17.3879	29.0476	30.3952	40.9112	25.3374	42.0903	23.5935	24.6531	53.0892	21.0492	38.8103
37070	3.1404	2.7129	2.2348	3.2557	3.3318	2.0806	2.9881	2.9339	3.8154	2.9101	3.2557	2.9359	
37071			0.803	0.7465	1.2177				1.3037				
37072	7.3568	21.5722	6.2922	7.3405	8.4761	15.1784		25.3121	7.5878	23.454	13.8054	10.2282	53.3923
37073	1.235	1.426	1.3532	4.3893	1.5305	3.5785	2.1555	3.3751	2.4759	2.0751	1.662	2.4681	
37074				0.8433		2.278			1.074				4.4017
37075			0.6876	0.9436		1.1799	1.4214		1.1902		1.9812		
37076	6.8099	8.2196	7.8951	6.606	8.8491	24.9297	15.3142	16.7863	18.9185	16.9086	17.9459	14.9468	17.7748
37077				1.1981		2.0033		4.2025	1.7769				
37078									1.6702				
37079			1.0657	2.0294		1.032			1.3595				
37080			0.8628	1.1489	1.7719	4.8465	4.9263	2.2701	1.9083	2.0036	4.7845	3.5458	
37081	1.0978	1.8998	0.9753	2.1562		8.4526	2.0781	1.2225	4.0689				6.3884
37082	4.9024	4.7592	3.6198	4.1079	6.0154	6.5216	7.073	7.3921	10.0935	9.777	7.7128	10.0309	13.3607
37083	27.4221	35.7664	20.2581	29.2078	43.4688	37.4903	67.9709	67.6791		46.3745	63.2292	44.0993	116.6659
37084	0.9783	0.8879	1.6723	2.3612	1.1947	2.1119	2.0384	3.1571				1.6464	
37085													
37086	7.4323	8.2911	8.143	11.7685	10.3389	11.7318	13.1078	13.7525	11.412	7.0527	7.2479	6.296	9.5739
37087	14.6679	4.3496	40.3938	29.9725	49.6232	9.3342	47.6888	13.7222	18.4445	18.5448	21.9447	14.427	17.3902
37088	4.9181	8.1336	5.0953	6.2503	4.1242	7.3254	6.8626	6.9021	6.7542	13.1087	5.4199	7.2081	9.2027
37089	2.7916	2.7958	3.2184	2.9438	4.4472	8.0402	6.8689	1.8326	7.7927		4.3534	12.0634	6.9909
37090													
37091	0.9222	1.166				2.1045			1.9412				2.2654
37092					1.0923				1.2098				
37093	20.515	27.3286	8.0159	24.9144	24.9969	33.9781	27.312	53.5234	31.7076	34.4966	54.1901	37.9683	55.7734
37094									1.7097				
37095	2.0658	3.8491	1.8738	3.1064	1.722	1.6415	1.446	1.5796	2.4311		2.5891	1.5139	2.8276
37096	2.6575	4.2856	4.5791	4.0955	3.5906	13.7141	8.826	14.2785	11.0857	15.6946		8.217	21.0838
37097	1.6802	2.1785	1.581	3.3069	3.8883	1.705	1.9093	4.1405	2.1667		2.2456	2.2475	
37098	2.2442	0.9855	3.1388	4.5967	4.0754	9.3321	9.6004	2.3155	10.7056	6.1106	8.3144	6.8355	10.3379
37099				0.7278				1.2488					
37100	3.4173	1.2239	1.4046	2.0382	1.7566	1.5515	1.3099		1.2558				2.4867
37101	1.0445	1.2953	1.1678	1.196	1.2199	1.69	1.7591	1.4754	1.3411				
37102	3.3965	1.979	2.6652	1.9715	3.5373	1.5641	2.0485	1.3371	2.4571	2.1098		2.78	2.9482
37103	1.1499	1.787	1.1455	1.5155	2.4939	1.8076	2.2175	1.5664		2.3396	2.1736	2.4071	2.3547
37104	17.6069	16.6127	20.4683	20.4759	14.3044	40.5517	32.2291	42.6466	35.7527	30.0306	39.1441	39.6715	75.4343
37105	2.1092	11.068		0.9394	1.3713	4.6756	1.3601	21.2617	2.0371		8.5745	8.1241	
37106													
37107	4.3458	7.3587	3.8866	5.9643	4.7936	5.3093	6.3452	3.1916	6.4081	4.9121	5.9444		16.5835
37108	2.4852	2.3518	2.9057	3.1346	2.8812	3.3464	2.703	3.0943	2.9535			3.0539	
37109	9.1718	13.3912	9.8689	15.6185	11.4776	11.3886	13.8008	17.6789	16.1913	15.8502	10.2516	10.7253	16.2512
37110													
37111	7.2161	5.9146	20.4058	6.863	12.0809	9.9289	12.7839	9.767	8.971	10.1974	7.0232	9.3341	8.6781
37112	0.962			1.5951	2.3979								
38001													
38002													
38003	3.6861	5.2246	4.8567	6.5363	8.593	6.5329	7.4771	7.1678	7.8875	7.0705	8.98	7.3034	6.4025
38004						1.1204							
38005	8.3836	10.8978	9.8343	8.2699	9.5433	2.6605	2.1444	4.156	3.0901	3.7889	3.0369	4.7635	1.9138
38006						2.165							
38007	1.4512	5.1271		1.544	7.6521	8.825	17.0936	4.4794	13.2941	11.927	6.2965	9.9887	5.9683
38008					1.1174	1.3473						1.4122	
38009	0.9069	1.0642				2.1392		1.5356	1.8014	1.3882		1.8766	
38010													
38011	1.7435	2.164	2.1621	2.2032	2.5614	2.5076	2.8691	3.1101	2.798	2.4436	3.1167	2.9742	2.0138
38012													
38013	1.6023	3.744	4.2296	5.8106	3.4396		2.2164	3.8364	1.794	2.075	2.048	2.7441	2.5932
38014	1.8425	1.4805	1.2105	1.2486	1.9657	1.5656	1.2947	2.0283	1.3399			2.0978	
38015	5.7599	7.2219	6.5579	8.1005	8.8744	14.6723	13.019	13.1795	12.5418	9.9463	14.3365	15.8114	6.2892
38016													
38017	1.7222	3.8995	1.0887	2.772									
38018	8.8252	4.0935	16.489	17.3606	10.9115	25.777	27.9508	26.01	21.1071	6.0058	15.9694	26.391	20.9017
38019		1.0006	0.8803	0.8231	1.071	2.1416	2.5062	2.2002	2.0551	1.5379	1.9103	2.0307	
38020	4.928	8.4027	6.2058	6.6485	8.2433	6.9504	9.1165	7.6738	8.3098	7.2324	7.2203	9.2676	4.0237
38021	5.4586	6.3101	3.2429	3.1766	7.6686	9.2443	7.8538	5.3834	8.5517	6.9962	10.2143	8.1428	5.8726
38022			0.6749										
38023													
38024									1.2762				
38025	7.7134	4.7668	6.9687	7.1319	6.219	5.387	5.9166	5.6531	5.742	4.7221	9.0495	7.7854	3.0091
38026	6.3669	8.3682	2.8912	8.0469	7.3625	7.9104	3.6704	12.4023	5.5143	8.7697	7.5866	7.3268	6.1892
38027	6.028	7.6848	8.6416	6.3684	12.4621	16.8328	19.8319	19.1499	15.3281	11.356	14.2156	15.9252	7.5044
38028	2.3494												
38029		0.7515	1.3687	1.1814		0.9805			1.3247		1.7039		
38030													
38031													
38032	3.2535	1.747	2.9633	4.7483	3.3486	2.7378	2.5679	2.7213	2.7526	2.7391		3.1591	1.5991
38033	4.2192	4.4578	4.9892	5.2839	7.2761	8.0369	5.6717	4.3626	4.3079	3.6394	5.471	5.8468	
38034													
38035	12.1193	14.2085	16.7417	16.2603	17.9351	13.2168	18.332	17.3112	14.6174	19.7777	27.514	17.519	21.0968
38037	6.7366	9.5485	9.7653	11.5765	12.609	24.3633	32.8325	26.8045	22.502	18.0039	25.4572	26.4928	12.478
38038													
38039													
38040													
38041		1.1286			1.0838			1.3996	1.2989		1.5708		
38042	0.9512	1.1357	1.896	1.1872	1.0496	1.6186			1.1939				
38043	0.9584		2.007	1.5994	3.6337	2.5085	8.6476	2.6568	7.8611	4.7436	8.0968	4.8881	2.561
38044	2.8813	3.7564	2.8942	3.5191	4.086	7.6933	9.2121	6.3541	6.6878	5.627	6.1857	6.4122	3.3942
38045													
38046	2.607	4.3601	1.9864	3.5069	4.8759			1.4069	1.401	1.7765	2.8178	2.197	
38047													
38048								1.8358					
38049	1.0222	0.9875	2.2822	2.8603	1.0776	1.7328	1.6161		1.6919				5.6038
38050	1.1385			1.159	1.0432								
38051							1.4888			2.0906			
38052	2.0288	2.0997	2.9169	2.0206	2.8859	0.9974	1.7429	2.0872	2.0448	2.066	3.2878	2.0905	
38053													
38055													
38056													
38057													
38058													
38059													
38060	2.0288	4.5766	1.4263	4.2342	3.9291				1.2332			2.2027	
38061	3.6692	5.4389	8.0778	4.7689	4.7285	4.6186	3.5056	5.2045	2.9471	2.6862	4.9839	4.5593	
38062	3.3093	2.7517	1.4564	3.3357	2.8607	2.7201	5.7113	5.1647	3.7549	3.8732	3.5779	3.8305	2.1135
38063	4.3562	7.5361	4.8443	4.7885	7.8042	5.2779	7.3598	4.6491	5.7615	5.0567	6.1843		3.3851
38064	10.9901	13.6735	15.3278	13.5711	18.6764	21.948	33.0738	25.1329	23.6484	19.0714	25.0792	24.095	11.0851
38065													
38066													
38067													
38068	1.257	1.5983	0.6854			1.7961	1.5646	1.4188					
38069	1.5404	2.3814	0.8542	1.7067	1.3692	8.0665	4.7067	2.3518	2.6252		2.048	3.2301	3.2684
38070		1.2092	0.893	0.7774									
38071			0.8498						1.059				
38072													
38073													
38074	1.6815	1.6951	1.3346	1.5582	1.5643	1.0911				1.8271			
38075	2.9755	2.6676	4.4539	5.5797	1.3164	11.1592	12.1217	18.9814	18.8812		6.9596	8.5933	8.5578
38076	4.3438	4.9392	5.4799	5.1451	6.3872	6.8198	8.2447	6.4156	6.1704	5.0603	7.1728	9.5972	3.0537
38077	20.0576	13.6301	36.4737	51.1991	24.6547	17.1456	55.269	8.6435	61.6945	19.2186	35.1857	58.8065	11.5178
38078	2.0407	2.6422	3.1339	2.9118	3.7489	4.7548	6.2086	4.553	4.1867	5.0771	5.0368	5.1098	5.4356
38079													
38080													
38081	6.5124	6.2675	6.7156	7.2501	8.1291	9.9243	10.9111	11.5695	9.2254	9.3192	8.3625	8.5839	7.1105
38082	2.4035	2.2789	2.7261	3.1777	2.4345	1.862	4.7187	1.918	1.9589	2.0419	2.2491	3.476	
38083													
38084	1.1197	1.4854	0.7176	1.1056	1.3022	1.172		9.3659	1.8754			1.5459	
38085													
38086													
38087			0.6752		1.324	1.7068	1.5424	1.4306	1.1035				
38088													
38089													
38090		0.9205	0.8931										
38091	2.7509	2.6902	9.9896	6.0798	4.1363	6.0239	8.8445	6.4201	3.9672	4.3918	5.2098	4.9271	
38092													
38093													
38094	1.0827	0.9049	1.4871	1.1773	1.309	0.9259	2.5047	2.0483	2.3683		2.357		3.0603
38095	3.3268	3.8683	2.232	4.4211	4.6145	5.1198	8.576	6.0305	7.277	5.8621	4.7009	7.103	3.7169
38096	1.7601		1.3037	1.4679	2.7787	3.3401	2.5764	2.1048	2.6787	4.5605	1.5014	2.2141	4.3391
38097													
38098	1.2374	1.043	1.0247	0.8325	1.8464				1.1864		1.4442		
38099													
38100	3.8139	3.221	4.5454	4.2998	5.4324	4.5549	3.937	3.9321	3.8014	3.5308	3.7474	7.2943	2.715
38101													
38102	1.3156	1.2674	1.5947	1.5407	1.3994	1.945	2.4034	1.906	1.5989	1.8583	1.7188	2.08	
38103	1.6406	1.8435	2.2047	2.652	2.4726	3.6239	4.9984	4.5784	3.465	3.3965	3.5261	4.0167	
38104			0.7589	1.0607		1.0513							
38105	3.0573	1.9672	7.6701	5.5714	3.0778	3.5198	5.7542	3.0542	5.5707		3.8726	2.7898	2.8943
38106		1.4417		0.823		1.1161	1.6172	1.6827				1.7295	
38107	1.3902	5.6101	2.4272	7.1945	4.8159			1.7277	1.3954		1.892	1.6929	
38108	9.0933	11.3733	14.7095	17.5416	18.2759	12.4336	19.4371	14.8585	12.6506	10.5335	11.8917	15.9389	6.5731
38109		0.6858	1.1503								1.3108		
38110									1.8076				
38111	11.8576	12.2139	14.1699	20.6187	17.5589	18.1219	18.8632	22.7998	15.8085	13.9571	16.3068	21.6378	11.2355
38112		1.4854	1.6776	1.0949	1.4425			1.1849					
39001	2.3246	2.4383	3.0314	3.5151	3.5914	2.761	3.3521	3.3128	2.6584	1.6781	2.8974	3.4737	
39002	0.7392	1.182	1.0178	1.7047	1.3847	1.4019			1.506				
39003	3.1397	3.5863	1.9336	4.2999	3.6767	4.3205	4.5973	5.8188	7.3944	5.1398	5.1336	6.1476	12.3772
39004	1.3754	1.0014	1.5726	1.5121	2.0172	1.6581	2.0493	1.8454	1.5345	1.4888	2.0469	2.1203	
39005													
39006	1.7092	2.7735		2.0163		2.4108	3.2167	2.7678	3.6589	2.9521	1.9985	2.5345	2.3071
39007	1.9163	3.4876	4.001	4.0405	4.4638	2.8127	2.0674	7.4835	3.4253	2.971	3.0887	3.1577	4.7733
39008	1.5154	1.7785	1.4942	2.0069	2.1827	1.8486	2.3581	2.2715	2.5627	2.3935		2.6995	
39009													
39010	1.4638	2.1475	1.5956	1.8748	2.1591	2.5244	2.1154	2.7051	2.9202	2.7447	3.2567	3.1246	
39011		1.0857											
39012													
39013	2.288	9.5118	1.9605	3.4323	4.6064	2.0947		2.4139	4.2254	3.0272	2.2461	1.8743	2.2338
39014	10.846	14.491	15.6098	16.8992	20.4856	16.5082	20.8849	16.204	22.8426	14.3534	25.0184	15.0258	41.9724
39015	1.5044	2.8776	1.6839		2.1619	3.145	3.9302	1.8866	3.6032	3.6306	2.793	3.0769	
39016													
39017	2.169	3.1828	1.5237	2.8135	2.8339	2.3375	3.4296	2.1203	4.0019	3.8632	4.1278	4.7073	3.0288
39018	5.69	9.8065	4.4553	6.2588	6.8282	1.8135	2.0499	6.1806	3.4566		3.7793	4.3461	
39019	8.8554	9.9652	10.7114	11.0097	11.0586	2.9789	3.122	5.8225	3.84		5.1797	8.4589	2.5839
39020	6.3356	12.4742	8.2197	12.0987	14.4946	10.8678	15.6941	21.2582	15.6435	14.8084	17.6111	18.571	19.2697
39021	2.5502	4.2475	1.8764	3.373	2.9084	3.3423	1.5821	1.6934	2.8133	1.9538		2.6529	3.0089
39022	8.0486	5.7247	6.5735	6.828	9.1066	5.9746	4.9026	5.9008	9.0794	5.4466	7.3661	8.1508	3.5205
39023	2.3174	3.9622	1.4956	2.6648	2.5645	2.9055	2.2149	7.1577	2.7778	2.1201	2.0499	1.7618	4.8509
39024		1.1992											
39025													
39026													
39027	3.5521	3.3022	4.648	4.9278	5.3965	7.148	8.9361	7.6443	5.5343	4.4971		7.7259	2.5059
39028		4.3679	1.6697	2.4272	1.5583	2.0103	1.987	2.4959	1.8061			1.7746	2.0602
39030	1.0811	2.1993	0.8796	1.7343		1.4421	2.8771	6.6834	2.075	1.9484	1.9033		
39031	3.2847	3.8945	5.4643	4.9245	8.2801		2.1457	1.7446	10.5423	4.0524	14.2469	5.7549	
39032			0.7433										
39033				0.9132	1.1057	1.4545							
39034	4.3193	7.9394	3.2308	6.3653	6.2879	7.9038	7.8691	22.7199	8.8968	8.1518	6.8248	8.2835	5.382
39035	13.804	20.1196	12.4779	19.1189	10.9401	21.9426	29.2402	35.6574	24.2456	20.3733	20.6764	22.8992	38.6437
39036	5.4394	4.1816	3.6147	3.8818	4.6678	4.1352	2.2228	2.2057	3.0021	3.0268	3.0047	4.2384	
39037													
39038	0.8508	1.5922		0.8121		0.9149					1.6406		
39039													
39040													
39041	2.1794	3.4941	1.4269	1.857	3.9009	3.2434	2.0025	1.9523	3.7801	4.6733	6.15	3.3848	
39042				0.7708									
39043	1.0639	1.4328	0.6924	0.7763	1.348	1.7641		1.9236	1.7732	1.7469	1.9508	1.3921	
39044				1.0307		8.0508		1.21	1.5596				
39045	0.8176	0.9041											
39047	15.1435	17.5993	16.5976	18.7754	22.6584	24.8569	38.8744	26.8474	24.1683	23.5798	26.5365	27.3864	18.3264
39048	3.4847	6.8777	3.0333	5.2642	4.1902	2.8673	6.242	5.1952	5.7179	3.1809	3.2916	3.2154	4.1198
39049	12.5681	13.1218	16.3857	12.4998	12.501	27.1353	28.0811	26.1009	18.6968	10.3787	16.6367	18.9303	15.0845
39050													
39051		1.2449	0.8828		1.1875	1.3048	2.1358	1.3554	1.5759		1.6576		
39052	5.5759	6.0799	5.9994	6.355	7.2172	8.6868	10.8279	8.2945	8.5679	7.4849	8.4991	7.8305	3.6204
39053	1.8635	2.4403	1.2999	2.6889	3.1314	1.5999	3.2097	3.8877	2.2241	2.0979	2.4853	2.6488	3.3317
39055	10.795	12.5837	8.5829	16.422	1.5788	13.5416	11.0892	24.2975	12.4891	16.4633	6.6176	10.3603	53.4543
39056													
39057		1.1536	1.4209	1.3692	1.6162	1.5451	1.4233	1.5532	1.6004	1.3977	1.8008	1.9122	
39058	2.8237		16.5304	14.9079	10.0326	5.1073	50.7334	6.0024	19.3428	5.5446	6.616	11.2887	21.9212
39059	4.2909	3.8642	4.7447	4.2981	4.4582	4.2496	5.215	4.3817	4.293	4.132	4.9708	4.5993	7.3309
39061							1.2706						
39062	12.2923	7.35	6.0832	5.4313	8.7826	8.576	4.104	1.6382	10.4761	5.8897	11.5114	14.1554	5.5268
39063	15.149	20.4618	14.9442	24.9111	23.1152	15.8425	21.5352	21.0387	22.2913	21.7826	18.7855	20.9687	16.9593
39064		0.8143			1.3755	1.0654		1.1368			1.373		
39065							1.4832						
39066	0.9623	0.889	0.8234	1.1004	1.1972	1.281		1.2807	1.3553			1.8524	
39067	6.4729	1.9811	1.046	1.4699	1.7184		3.3156	1.6404			1.5254		
39068													
39069	6.6815	9.37	5.8291	5.6162	6.2874	4.8513		2.4771	8.7276	4.6927	8.1127	5.8463	4.7472
39070	3.4764	4.9981	5.1615	4.7208	5.0407	4.5958	8.7374	10.0768	7.4081	9.104	10.3849	6.7268	7.4775
39071		0.7456				1.4375							
39072	6.3074	3.4286	1.4449	2.4063	5.997	5.0059	8.2638	11.2291	7.3599	6.4562	9.2445	8.3798	5.7541
39073	1.355	4.4797	1.1947	4.2562	3.3721	2.906	2.8158	5.7429	2.1325	5.0239	3.2533	3.2862	2.2384
39074	1.0699	1.2928	1.2327	1.3406	1.488	2.2528	3.0038	2.2551	2.4471	1.9812	2.3605	2.562	
39075													
39076		0.6834											
39077	41.8003	46.0757	36.7422	39.3887	58.4306	216.5026	119.7499	84.1583	106.8191	81.3501	80.5766	109.3587	93.6349
39078		0.866	1.1048	1.2341		1.3664	2.0793	1.5068	1.5266			1.888	
39079													
39080		0.8286					1.5855	1.1118	1.409				
39081	3.9001	4.0898	1.9174	2.8033	2.9338							2.2363	
39082	2.3743	2.2328	2.0913	2.8047	3.6797	3.54	3.3316	2.9605	2.4892	3.2508	2.9919	2.801	1.9096
39083				0.8975				1.6964	1.241				
39084						1.0575							
39085								1.2468					
39086		1.7377	0.9875					1.2622	1.3259				
39087	1.265	2.293	1.1004	2.128	1.8388	2.2519	5.5505	2.4779	2.0477		3.208	2.3431	3.9488
39088	1.5823	1.7712	1.7092	3.9932	1.1709	3.8408	4.0711	2.9586	3.2883	4.9391	3.2391	2.5992	
39089	7.9518	8.39	10.2255	10.1234	10.7322	8.7674	14.5263	11.2671	9.4803	8.0925	10.6682	11.1564	7.9361
39090	11.6736	13.3046	13.7272	16.1914	16.6063	23.2712	21.4266	17.8508	14.6017	20.4156	17.9316	14.5655	23.4563
39091	2.8213	3.697	2.6127	4.5147	3.6638	2.7195	3.0425	2.545	2.9342		2.61	3.4671	2.1802
39092		1.51	1.0845	1.0643	1.4447	1.2217	1.3636		2.5438		2.0753	1.932	
39093	1.2737	0.8617	1.4889	1.2901	1.2024	1.4894	1.8438	1.3016	1.1861		1.5165		
39094	1.1354	2.1108	1.7874	1.8009	1.3211								
39095						1.0306	1.7603						
39096	3.8802	2.4965	2.4524	2.1332	2.4092	2.3601	1.5739	2.1463	1.7509		2.2236	2.8411	
39097	1.0911	1.7727	1.0978	1.4097		1.2372	1.5141	1.0404	1.6621		2.304	2.9733	
39098	1.3333	1.3197	1.4276	3.1218	1.8091	1.8191	1.8496	2.1988	1.8589		2.0566	1.6455	
39099	1.1417	0.8909		1.1523	1.4397	1.0334		1.4257	1.5713				
39100	20.5082	20.6485	16.257	18.7766	19.6255	21.2518	28.3335	43.7167	27.5717	38.9494	36.7144	27.2109	46.936
39101	2.5762	11.8438	6.7163	4.026	2.9095	4.7569	6.2122	2.1779	8.8152	6.9043	4.7511	5.6018	4.1857
39102	3.8775	3.5548	2.6768	3.6991	4.3711	1.728	3.1473	2.9121	3.052	3.6918	4.0276	4.1042	1.9776
39103													
39104	21.882	23.5743	8.351	14.7057	27.2381	12.8704	22.604	14.991	34.456	27.7583	37.2892	24.9642	21.8102
39105			0.8157	0.9051				2.6503	2.2091				
39106	3.2108	3.053	4.5038	2.1675	3.1018							1.4813	
39107													
39108													
39109													
39110	19.3065	18.4784	20.0504	19.8395	24.0801	7.2638	4.7994	9.5692	7.1399	8.5769	7.8407	13.4613	5.998
39111	2.4729	2.6989	3.1567	2.9856	3.2973	2.514	3.8813	2.1062	2.3709	2.5659	2.0573	3.2915	
39112	19.2654	19.8724	31.6599	24.5748	32.5252	53.3192	38.1798	52.6372	36.315	31.7155	28.4401	38.284	233.6664
40001	1.6907	2.3983	1.6132	1.8699	1.8244	3.0555	1.4851	4.2269		1.6798	2.3188	2.6919	4.4084
40002	8.8048	13.1861	11.8356	12.571	15.1603	9.3042	13.2238	12.935	10.6722	8.3824	12.0152	11.9185	
40003													
40004				0.7829			1.2479						
40005													
40006													
40007													
40008	0.8998	1.1803	1.1362	0.8888	1.3816	1.4124		1.5099	1.5169		1.6531		
40009	1.4629	1.6561	2.3958	1.6163		1.1596		1.4433	2.0502				
40010	15.5817	16.5546	14.6202	16.5971	17.9562	5.3654	5.9517	10.1441	5.8389	8.3312	9.2723	13.6812	
40011													
40012													
40013													
40014	2.0353	5.3975	1.6678	3.5208	2.39	5.647	2.8544	9.2586	5.051	3.8971	4.9148	4.9608	8.9241
40015	1.3881	2.2752	1.72	2.5624	1.6975	1.6362		2.3729	1.8478	2.2466			4.6528
40016	1.0454	1.279		1.4183	1.1553	2.1138	1.7064		2.1416	1.9367		1.7466	2.3188
40017	6.3979	10.3642	9.0972	7.6587	9.4222	9.0327	11.7356	11.6342	11.056	9.2307	10.9468	10.9851	
40018	1.7095	2.814	3.3673	8.7108	4.7462	1.2298			3.1123		3.8134	3.2562	
40019	1.9963	1.3205	1.6014	1.6166	1.3753	1.6106			1.4213	1.3714		2.0401	
40020	5.5915	8.3807	10.6457	11.6444	10.6324	7.648	15.8117	10.5512	8.3712	5.5401	10.1659	9.7842	6.8161
40021						1.9522	2.1213	1.2365					
40022													
40023	1.9841	1.8587	3.7218	2.1153	3.219	2.7056	3.798	2.3989	2.708	3.1942	2.7242	4.0159	
40024		1.0442	1.0373										
40025													
40026	1.0076	0.985	0.6623	1.0434		1.4752		1.5705	1.4957		1.88		
40027													
40028	1.2325	1.8253				1.6605							
40029	3.7462	6.4465	2.5185	1.9815	2.1204	5.5886	3.5447	7.6729		4.8921	7.4853	3.6419	4.0939
40030													
40031	1.4192	1.7992	1.9779	2.2437	1.8029	2.1362	2.1166	2.5088	1.494			2.5848	
40032													
40033													
40034	0.8159	1.1509	1.3397	1.454	2.5634			1.1466			1.691		
40035	2.5699	4.9551	4.1296	2.8018	3.6088	3.187	1.6138	3.2279		2.0389	2.2294	2.8395	2.0259
40036	0.7061	1.1331	0.9868	1.3194									
40037	1.9823	3.0532	1.3209	1.9833		1.6946	2.1623	1.5277	2.6842	2.7561	1.7527	1.919	3.2407
40038		1.1975				1.2623							
40039													
40040													
40041													
40042													
40043	2.349	4.5237	1.1682	2.2195	2.7675	4.6119	3.869	3.3535	4.2067	2.4676	3.7948	3.8319	5.7548
40044													
40045													
40046													
40047													
40048													
40049													
40050	1.3586	1.4668	1.7063	1.7921	1.9388	2.1953	1.7918	2.1117	2.3007		1.5243	2.0912	
40051	2.687	1.5837	1.9954	1.8439	2.6384			1.2902	1.5367				
40052	1.886	1.9861	1.8419	1.9142	2.765	3.2206	2.4493	6.4309	4.1213	2.264	2.9327	3.1941	
40053													
40054		4.1364	4.6628	3.3413	3.3197	6.7708	2.6302	3.5629	4.9708		1.5034	3.792	9.5797
40055													
40056			0.8287										
40057	1.7165	2.148	2.6368	5.3702	3.8081	2.92	4.2853	4.0459	3.7511	4.2368	3.7016	3.6733	
40058	1.0822	1.7636	6.3246	3.2603		3.1851	3.4278					1.3124	3.4317
40059	1.6862	0.8223	3.2831	3.7421	2.7252	3.0137	6.2843	3.2624	2.8157	2.581	2.1007	2.5712	1.9115
40060		1.0338		0.9973	1.1891	1.5001	2.5962	2.3074	1.7136		2.8418	1.5332	
40061	3.9755	9.2516	5.3875	8.2557	5.2192	1.2027	1.8963	3.3598	2.0516	1.9742	2.0313	2.3828	
40062	0.9121	1.1394	1.4214	1.4718	1.7913	1.9466	2.6659	1.8455	2.2961	2.3429	1.8229	2.7281	
40063	1.2876	1.2436	1.6309	1.2949	1.5997	1.9246	3.2787	2.5367	2.512	2.0005	2.1294	2.5846	1.7818
40064				0.733									
40065	1.5443	1.2407	1.7189	2.4298	1.2145			1.2752	1.4262			1.7497	
40066													
40067	2.0963	1.88	2.5199	2.6572	3.1461	7.2091	11.2408	8.0772	11.8764	11.1539	15.5842	12.8336	6.4103
40068							1.9165						
40069		1.127		1.9917									
40070													
40071				0.9171		1.2039	1.4701		1.7626				
40072	2.4935	2.5646	3.6275	1.7987	2.0844	3.3485	2.4187	3.5049	1.9527	1.8053	3.424	2.1995	3.1291
40073	19.0541	20.5963	21.232	16.0529	18.8545	8.3716	5.9859	9.0431	5.7487	7.0276	7.7305	10.3611	3.7053
40074													
40075													
40076	3.0749	2.8969	3.0838	3.4799	3.9894	1.9948	4.0753	2.7367	3.2301	3.4833	3.5855	3.9405	
40077													
40078													
40079	2.4862	5.0803	1.86	3.4686	4.0849			1.2603	1.6899			2.4887	
40080								1.2809					
40081													
40082	6.9104	7.9524	8.7326	8.7716	10.0851	13.124	15.1178	14.822	10.7769	9.3649	10.7632	11.2901	6.495
40084	2.8633	2.0805	4.2285	3.2155	3.3641								
40085	5.0276	2.8173	4.1981	4.1635	6.5793	5.5182	6.1505	10.0595	6.0961	8.8291	7.1083	6.072	14.494
40086	2.0106		2.9341	1.3944	1.2137	1.6962	2.4405		2.6724	2.4881		1.9746	11.205
40087	0.9035	1.1159	1.162	0.8851									
40089													
40090		6.889	2.3834	12.5838	1.3532	6.1707	28.2921		3.2283		14.6337	2.4729	
40091	2.6541	7.7525	2.0257	2.2972	3.1659	3.6034	2.9625	1.9081	2.8348	5.0368	4.7852	4.2949	8.325
40092	1.2277	1.2909	1.0491	1.1401	1.6351	1.4545	1.5873					1.4201	
40093													
40094	4.4018	3.5729	5.5205	6.1081	5.9783	7.6289	20.0165	7.8128	11.5508	8.2815	10.473	10.4179	11.1967
40095													
40096													
40097	15.1913	13.5407	15.9974	15.7619	14.4128	6.1269	5.7193	8.1275	7.1406	7.0914	9.3304	13.4416	4.3292
40098													
40099		1.1156	2.5492	1.3905		1.8618	2.965		2.0037				
40100	3.5097	2.8556	3.8546	3.7324	4.2258	3.4491	4.0011	4.9019	2.4691	2.448	3.5011	3.6594	3.9453
40101	1.3756	1.8321	1.7999	1.9711	1.7363	1.2088		1.5637				1.5705	
40102	2.3479	4.4199	2.7695	2.9453	3.6537	1.3221		1.976	1.7089			1.7935	
40103	6.5268	2.8293	10.4129	11.459	9.9897	9.2577	11.9762	3.3766	5.7444	2.8047	4.3277	9.593	3.9803
40104	2.7692	8.1132	1.2772	1.9142	3.4208				1.3906			1.614	
40105													
40106	1.614	2.5626			1.3364		1.8474	1.2346	2.3271			1.7991	
40107	11.5467	3.4558	1.7096	3.3501	3.9464	3.288	2.531	3.4295	2.3497		3.6991	2.646	3.2389
40108						1.1366							
40109	1.3752	1.0032		1.8457	1.7465								
40110	1.0702									2.3704			
40111													
40112	28.7796	41.8727	21.5878	37.7588	49.284	57.7629	85.8675	67.7625	78.6872	66.5035	57.9661	61.0912	60.5338
41001													
41002	1.1009	0.8368	1.3091	1.5449	1.7013			1.2784				1.6588	
41003	2.9364	4.0669	6.1862	6.5974	20.4561	11.189	48.2971	14.5163	8.8823	6.2517	12.2948	19.267	3.0864
41004													
41005	27.1198	27.189	21.9585	32.2669	42.8503	82.602	94.2825	100.6897	103.6847	82.0827	115.7101	127.0272	228.1207
41006													
41007													
41008													
41010	140.8258	157.3158	145.4193	154.3447	186.7894	90.9079	67.2417	116.2459	85.6966	94.4702	113.2715	145.2007	35.551
41011													
41012	56.219	49.8459	42.4594	69.9272	87.6441	2.3607	2.493	2.9264	2.8237	2.8337	2.3568	3.3264	6.4655
41013	1.0412	1.3438	3.036	1.4372	1.2731								
41014													
41015	1.7529	3.6213	0.7928	1.801	1.6128	1.9956	2.2093	1.7547			1.8873		
41016													
41017	2.4896	2.7594	2.7752	2.7844	2.7713	1.7615	1.9381	2.1901	1.5228	1.8374	2.0198	2.5227	
41018													
41019	28.5127	26.7415	22.5205	35.4785	42.186	24.4421	27.8424	30.1438	34.5048	27.4877	31.013	36.5535	70.6191
41020	2.0209	1.3152	2.2328	3.2184		1.3236		1.4618		1.3783		1.6335	
41021													
41022	11.3895	9.1716	5.7471	6.7214	8.856	12.2405	11.6026	13.1356	8.5949	9.5428	14.6017	11.0127	6.8795
41023	1.5319	1.9449	1.5858	1.0144	1.7564			1.2624			1.7899	1.4954	
41024	2.4063	2.0155	1.6622	2.4239	2.7117	1.2632		1.7171				2.2719	
41025													
41026	9.7736	8.5588	7.6589	11.3432	16.616	296.7087	382.2112	383.9966	373.5538	280.2245	411.2723	463.2234	776.2776
41027	7.8827	10.0598	10.8038	11.1841	12.6288	18.2375	21.0732	20.3535	17.8072	19.4029	18.5166	20.4855	10.5982
41028													
41029	3.8347	4.779	4.007	4.9815	6.2927	8.5843	15.7173	11.7541	11.0745	8.7212	10.4542	8.1614	7.2968
41030													
41031	1.0691	1.4163		0.8276	1.8406	2.9229	3.3831	11.2719	3.0759	1.8295	4.0556	3.523	
41032													
41033	71.2246	64.0024	62.5436	89.9419	122.719	8.0319	10.8919	9.6015	7.4374	7.207	8.7865	10.1219	12.2698
41034		1.8407						1.7629		1.7806			
41035													
41036													
41037	1.3576	1.3692	1.2689	1.3958	1.5263	2.646	3.0859	2.3388	2.7765	1.6372	2.2074	2.2463	
41038													
41039													
41041													
41042													
41043	2.0325	2.5915	1.6059	2.7526	2.7126				1.4785		1.7588	1.9731	
41044						1.1031							
41045	0.7561	1.3224	1.0635	1.238	1.3066	1.8984	2.9188	2.0138	2.5689	2.1787	1.9913	2.0987	
41046													
41047	79.5598	67.0136	56.6109	87.3148	137.2132	2.7748	3.6299	3.6824	3.8068	2.4524	3.1992	3.8155	9.9086
41048			0.6566	1.1776	1.951			1.3815					
41049	1.1479	1.2398	0.8514	0.8575					1.3089	1.8774			
41050			0.8688	0.8232								1.355	
41051													
41052	0.8829	1.0721		1.0799		1.6698	1.6764	1.4668	1.2658			1.6801	
41053													
41054	9.9253	9.4951	7.9411	10.6132	15.3153	224.4829	251.776	282.0584	231.6418	192.6058	255.5362	274.1209	391.3566
41055	3.0194												
41056													
41057	4.8	6.057	5.0177	15.407	6.9223	2.835	4.1501	5.3442	3.2184	4.4744	4.1091	10.4106	2.3207
41059													
41060													
41061	10.3688	8.9505	8.3024	11.3403	17.0399	271.1899	358.609	320.4975	354.0205	268.1468	403.9879	381.5765	767.6406
41062													
41063	1.26	1.1857	0.9509	0.8554	1.5116	1.8064	2.253	2.6072	1.9421	2.8117	2.2296	2.2259	1.9105
41064						1.2281	1.4487		1.2448				
41065													
41066													
41067													
41068	33.7042	29.934	28.5592	39.4466	53.1445	120.9735	149.8188	142.0899	111.3479	95.6201	136.1741	140.5179	302.7781
41069													
41070	0.8695		0.7564	2.4047					1.0957				
41071	6.3874	5.6617	8.3152	9.4691	9.8294	13.3738	16.5842	12.388	9.7929	8.5321	11.4824	14.8402	
41072													
41073						3.2363			1.0698				
41074													
41076							1.4806						
41077	2.8743	1.7516	0.6766	4.0541	1.8611	9.1772	2.4627	2.5684	1.5363	2.1229		1.512	2.6889
41078	1.0185	2.0516		0.7971				1.1347		1.6159			
41079													
41080	2.3521	3.2127	2.9735	2.4966	4.0474	1.0505		1.6346	1.3345		2.0265	1.9101	3.6052
41081									1.7078				
41082	50.1817	39.047	43.7663	57.5871	76.5749	38.5129	50.5111	50.6792	43.2229	36.071	44.8051	48.4174	132.3927
41083						1.3105							
41084													
41085	3.2055	3.4992	7.589	3.019	7.3631	2.5372	3.0079	4.6688	3.5434	2.885	4.2893	4.4102	1.8517
41086	0.9296	1.1225	1.4814	1.685	1.6221	1.2564	2.5502	2.0954	1.6794			2.1364	
41087	2.4244	3.4799	6.0992	5.4409	5.047	4.3251	9.9379	6.4818	5.2303	3.2294	4.6346	6.842	2.6328
41088													
41089	10.805	8.5518	9.3013	11.2884	16.9464	199.2511	259.2694	238.8054	233.1244	194.218	270.9619	283.8694	451.5221
41090					1.1733								
41091						1.5761							
41092	1.1788	1.3671	1.2653	0.8906	1.2597								
41093													
41094	2.0597	1.9323	2.545	3.0993	5.7796			1.8342		2.3173	1.8359	1.3796	
41095													
41096	139.4194	104.5915	109.0467	138.3987	201.8074	14.9028	18.6366	19.5198	14.5388	11.4483	13.2486	17.3286	26.8188
41097													
41098													
41099													
41100													
41101													
41102													
41103	28.181	25.2243	26.6856	32.4678	43.6926	64.321	90.8976	79.2562	89.1246	68.5875	87.6547	95.9035	216.9362
41104				0.7798		3.8926					1.6922		2.9508
41105	1.5996	2.1144	1.8576	1.8514	3.0341			2.2893	1.2607			1.3573	
41106	3.5337	4.4424	3.5751	3.0866	4.096			2.5149	2.6752		1.8359	1.8782	
41107													
41108													
41109													
41110	54.3174	39.156	48.4499	60.3689	89.3246	2.5404	3.4008	2.4029	2.8571	2.3769	2.7131	3.0364	6.7415
41111													
41112	3.0343	3.5215	6.1217	4.5061	4.2064	6.3651	8.0148	5.1104	4.1918	6.5361	2.8524	3.1877	3.6989
42001			1.3154	0.804	1.2736				1.1207	1.8276			
42002	6.3784	9.4133	16.9484	14.5451	23.4153	29.1124	50.1967	31.5259	20.6349	15.486	29.0651	50.0302	7.3987
42003	0.8501		0.6364			2.4023		3.4709		1.9727	1.8938		3.2744
42004	1.3248	1.4704	1.5387	2.0264	1.7244	1.8474	2.2601	2.2247	2.1336	1.6605	2.4945	2.1575	
42005		0.8065			1.7835								
42008		1.5212	0.6978										
42009	1.4102	1.3986	1.4712		1.1916	1.9693	2.9875	3.1181	2.0774		2.5781	2.1509	2.6068
42010						1.57		1.4204					
42015													
42016	12.2089	12.3467	10.3252	15.1684	15.8735	5.2812	4.5991	12.1201	6.6915	7.7436	9.9463	10.0452	3.355
42017	1.0024	1.1329	1.1645	1.3071		1.2966		2.0615	1.3139				
42018				0.7797									
42019	1.8911	5.9913											
42022	1.6485	1.888		1.3882	1.8997	2.0687		1.9697	1.4643	1.9444	1.8928	2.5867	4.7278
42023	1.417		4.556	1.7879	1.9935	2.8913	1.5308		1.7723	2.1314	3.0117	2.1919	3.2341
42024			0.9161	0.7559									
42029													
42030	5.5908	10.0756	7.9117	7.2578	10.0639	7.0016	10.5335	10.5879	8.9518	7.5115	8.096	9.077	3.9679
42031													
42032													
42033													
42036						1.1525			1.4915			1.3556	
42037	0.9603	0.7871	0.8098	0.8144									
42038		1.0841	1.0164		1.2496	1.0464	1.6675	1.4401			1.6632		
42043						1.5815		1.3461				1.411	
42044													
42045													
42046													
42047	1.6134	1.4149											
42050													
42051	5.5809	5.6846	5.273	6.4606	10.2872	16.655	19.8342	14.9024	21.6037	18.5233	25.7082	22.8089	10.0238
42052	1.296	1.7215	1.2712	0.9785	2.0212	1.0553		2.9474	1.0684	2.2859	1.8702	1.7478	3.1704
42057													
42059													
42060	1.5884	2.0059	1.5779	1.9504	1.8989	2.6313	2.5206	2.2397	2.0253		2.6725	2.2288	
42061	5.9032	6.7788	9.4632	9.4915	12.559	17.2807	26.8781	14.1206	19.1638	12.5222	18.5575	15.3532	6.545
42064	1.0737	2.2668	0.6694	2.6807	1.8822		2.7676		3.2416		1.669		7.182
42065		0.9296											
42066		0.8555											
42071				1.1231									
42072	1.5634	1.7764	1.2211	2.2509	1.2604					1.5136			
42073	3.5564	3.8976	3.7831	4.3067	4.9383	3.9253	4.5413	4.0448	4.5016	4	4.0814	4.1901	2.3522
42074									1.1659				
42075	1.5698	2.1656	2.1479	2.3712	2.1983	2.1713	2.3643	1.6634	2.1838	1.7724	2.0605	2.34	
42078													
42079													
42080	3.9204	4.4641	7.0873	6.3074	5.3178	4.1475	5.2557	3.9061	4.3268	4.0709	5.0125	4.6459	2.568
42085													
42086	1.4657	1.7225	1.3283	1.4355		2.375	1.6346	1.7734	1.2159			1.7375	
42087													
42088	1.7336	2.0638	1.9824	2.2975	2.1501	2.2718	3.2513	2.2163	2.4704	2.1222	2.458	2.6008	
42089	1.743	0.9515		1.111	1.5548	1.1752					1.6632	1.3946	
42092	1.9725	1.5388	1.3149	2.8693	2.1214	1.9656	2.6797	1.9941	1.5755			2.6792	
42094	1.1284		0.9451		1.2918								
42099	1.0101			0.8906									
42101	3.4358	5.0172	4.8365	4.3954	5.3027	4.7699	2.6795	4.0262	5.029	4.2812	4.1616	4.6247	6.1681
42102													
42103	3.0497	4.1728	4.034	4.0513	3.9893	1.6938	1.7006	1.6238	1.4501			1.8584	
42106	14.0074	13.7815	18.9808	13.2864	14.2713	3.7125	3.723	5.1712	3.3669	5.0783	4.2888	7.2605	3.6166
42107	1.3796	1.6259	2.7071	2.7956	3.3671	3.0525	6.7509	3.039	4.7709	3.6925	4.6137	4.8334	3.4152
42108													
43001	71.5321	88.0949	65.4268	80.1013	103.3413	57.8248	69.8725	68.6376	66.5285	53.799	93.4875	70.3107	71.0892
43002	1.6908	1.2731	1.3221	2.1611	2.1535	2.129	2.7833	1.6801	2.4104	2.765	2.9767	2.8437	2.0553
43003							1.4931		1.4832				
43004		0.7843											
43005	6.4544	9.6977	10.0923	8.9266	12.6569	9.4623	12.0739	10.1419	9.9529	8.7021	12.8816	12.7286	6.8045
43006		0.8431	0.7868		1.1065				1.2472				
43007	1.189	3.1009				2.4064		1.934	2.4517	2.688	3.017		3.4715
43008	77.7346	86.8104	69.3549	74.8466	112.1298	65.8893	79.814	76.1534	73.9012	59.4484	100.8099	78.353	68.6243
43009													2.2497
43010	1.5247	1.3526											
43011	1.9171	2.7935	2.4302	2.3064	2.9389	2.4791	3.2738	2.801	2.481	2.7325	3.3992	3.1925	
43012													
43013													
43014													
43015	72.2241	87.1308	66.6971	75.1742	107.6909	67.5803	84.8362	78.4991	84.1272	61.8936	110.4523	83.5037	73.4631
43016	1.5382	2.423	2.4041	2.5749	3.3563	1.7712	4.5859	3.1356	4.7148	3.3685	4.6377	4.5151	
43017													
43018		1.0385	0.7484	1.1831	1.092	1.1016	1.7163	1.389	1.1325	1.4487	1.7297		
43019													
43020	1.9755	1.8954				3.5073							
43021													
43022	71.556	86.1937	69.2872	77.8267	109.6203	61.4904	70.899	71.8158	70.6765	55.5234	101.3802	72.3642	75.3665
43023		1.8239	0.9422	0.8443		1.3434	1.8702	2.5349	1.2582				
43024													
43025		1.7561	1.0591	1.2678			1.592	2.522	2.1505	1.748		1.9715	
43026	1.4937	1.4585	1.459	2.1792	1.6016	1.9191	2.2881	2.1807	2.1207	2.0671	2.3143	1.9927	1.808
43027	2.5463	1.2511	0.9191	1.3624	1.1602	1.9559	3.1009	1.6941	2.3148	1.8018		2.2149	
43028													
43029	73.6116	77.6373	66.8206	80.0511	116.8602	59.8888	78.8715	75.1775	77.3431	58.1972	98.3383	74.1016	76.3754
43030													
43031													
43032	11.2999	14.6678	14.6898	17.2563	20.3245	18.6564	37.7914	22.2572	29.4007	25.4123	34.147	26.4987	17.6568
43033													
43034													
43035													
43036	74.8768	88.6942	66.7593	83.583	108.7339	71.9923	88.7442	83.8724	85.4244	64.5285	118.9909	87.6836	77.5385
43037	3.0187	1.6213	2.5059	1.1316				1.4582		1.8167	2.2162		
43038													
43039	1.3136	1.0159		1.1011				1.557	1.2889		2.158		
43040													
43041													
43042	0.8755	0.9143	0.8298	0.8109		1.289		1.4138		1.3568		1.5102	
43043	86.7522	99.4129	77.6274	94.0816	128.1523	73.8629	98.8556	86.0571	82.4076	64.4845	113.065	103.2664	72.1596
43044	1.4775	4.0552	1.573	3.7057	1.6787								
43045	1.3011	1.746	1.2865	1.4623						1.4231		1.3466	
43046													
43047													
43048													
43049													
43050	77.5297	89.9368	74.1307	83.8919	116.1581	64.8002	85.5112	76.3146	78.6575	61.4375	98.9657	72.5881	77.3064
43051	1.9178												
43052	2.5431	3.4006	3.5317	3.9369	4.3377	5.3163	8.6571	6.51	5.7475	4.7687	5.6349	5.8999	3.5634
43053													
43054													
43055	4.9408	10.5522	5.7565	13.0036	16.7685	4.0313	6.0166	9.2185	7.6197	4.8966	9.8016	5.8558	13.5255
43056	5.5338	6.7206	4.6269	4.7317	6.7453	3.9009	4.27	7.2249	4.4356	6.3608	6.5381	6.181	10.9431
43057	74.6264	84.5062	74.0071	78.2504	113.6579	66.3224	89.0962	74.4672	78.2682	63.8538	107.9997	76.8865	67.8446
43058		1.04	0.8027	0.7665				1.345	1.4901				
43059	2.3148	2.9471	2.0003	3.1287	2.5248			1.2626	1.3893		1.9585		
43060				0.9961									
43061			0.8454			1.5276		1.4517					
43062	2.8025	7.2973	2.4571	32.38	1.615	1.8166	2.3411		4.0864			1.6769	
43063													
43064	73.2883	84.9084	77.3595	83.362	112.6539	66.2862	88.9414	74.5189	78.3912	60.1682	99.7622	75.5591	77.5495
43065		0.8011	2.5413	1.1906									
43066								1.1836					
43067													
43068	7.3719	7.7783	7.9467	8.8566	10.3278	11.6718	12.3966	10.0229	9.8975	7.9745	10.7643	10.7861	5.0311
43069													
43070													
43071	101.1788	86.8773	72.7927	82.4502	115.8783	67.6255	88.7708	72.4455	80.8255	64.4558	113.0654	84.0939	73.9115
43072			0.7011										
43073	7.962	12.947	12.0644	12.5553	12.9586	10.6678	16.3689	15.3819	14.3924	9.7065	14.1254	12.2344	9.0367
43074													
43075													
43076													
43077													
43078	76.5913	88.486	76.9768	82.8269	115.4711	71.037	87.4839	79.112	80.1654	62.4395	116.0267	79.8395	73.5198
43079													
43081						1.1095							
43082													
43083													
43084	0.8755	8.7243				19.8203			1.9985				
43085	74.3269	82.2376	76.9404	77.561	121.0971	70.0583	92.0337	77.7421	80.9919	63.9424	116.3323	80.7436	75.3364
43086	0.7525	0.8114				1.3676			1.4829				
43087				0.9324	0.9974								2.2571
43088	0.8345			0.8318		2.7842	1.9767	1.4749	1.2626		1.6756		
43089													
43090													
43091	0.8998	1.4062	1.1606	1.4884	1.5876	1.4136		1.9322	1.399		1.6097	1.5893	
43092	79.1899	77.6211	76.6854	83.3693	118.6372	71.6164	97.5929	84.2016	76.7399	64.5763	117.5489	83.9878	73.1667
43093	4.4351	5.5852	5.5372	4.1292	7.3031	1.554	1.7808	2.0398	2.1022	2.9199	2.5	2.6188	
43094													
43095	2.7553	1.9755	2.353	3.1646	2.7551	2.5555		2.429	2.2648		1.8543	1.7408	4.0285
43096						1.6959		1.5696					
43097													
43098													
43099	69.9977	62.5503	73.4426	78.0699	121.5405	64.2292	84.6469	72.3669	72.5249	57.3032	102.0708	75.1954	72.0749
43100	4.9731	5.4923	7.7265	9.2106	10.0857	10.8977	14.7219	11.19	10.7638	8.3207	9.3183	11.8968	
43101	4.3532	4.691	7.8381	8.3976	6.5902	2.0789	1.8637	2.5173	2.3502	2.8	2.5221	3.3348	
43102	1.3254		0.7218	1.3064	1.5013	1.4037			1.2045			1.5424	2.0576
43103													
43104													
43105													
43106	70.6708	68.1313	76.3541	78.0953	116.5314	68.1055	82.5877	73.9332	78.8447	60.1921	106.1676	82.4383	78.0012
43107	1.8383	2.4435	1.4702	1.425	3.5314	0.9768			1.776				
43108	4.8291	6.7439	14.048	13.5816	5.4662	1.4911		1.9549			2.5579	1.9913	2.6989
43109						1.2006							
43110													
43111													
43112													
44001													
44002	1.8739	1.9733	1.9882	1.3236	1.9577								
44003													
44004						1.5616							
44005	1.2478	1.2773		1.2914	1.4525						1.7388		
44006	4.4348	6.3173	3.812	6.5937	6.4151	5.7263	4.6344	8.801	5.8969	5.111	4.6377	5.7094	9.1098
44007	7.8148	11.0608	6.3486	8.412	7.3932	8.7032	7.0173	9.4405	4.3119	11.7698	10.8224	10.9834	11.3698
44008		3.5859	3.2892	3.4298	4.3671	1.7672	1.741	3.6111	2.7393	3.824	4.4939	3.0579	
44009													
44010													
44011													
44012	8.3717	9.8147	7.6386	8.2381	11.8446	14.5536	19.3629	18.3525	17.5399	13.2744	18.0246	13.1734	23.0622
44013	0.8797	0.9594	1.2463	0.9978	1.312			1.3117	1.3327				1.9364
44014	1.7709	2.6372	1.0852	1.7539	1.6911			2.1529					
44015		1.5166	0.7672						1.1035				
44016	1.6428	1.9791	3.1912	4.4471						1.5622			
44017													
44018	7.9864	8.0532	8.5873	9.2463	7.823	3.1853	3.4879	5.7364	4.31	5.8788	6.6542	6.7172	
44019						1.208							
44020	1.6328	1.7841	0.7981	1.2008		1.7253	1.7426	1.9938	1.9119	1.3143		1.6847	2.7533
44021	1.4965	1.3702	1.5833	0.8377	1.9769	2.1898	2.2879	2.0832	2.6357	2.3962	3.238	1.9633	1.7441
44022													
44023	4.396	6.9467	3.3349	2.9796	3.3115	1.609	3.0651	4.2533	2.193	2.1139	3.8542	2.8414	
44024	2.0618	3.773		0.9079				1.3225	1.298			2.2477	
44025	3.3588	4.682	3.1985	5.1432		1.3769		2.5407			2.9156	2.5122	
44026			1.0232			3.3445		2.5207		2.2419			2.5325
44027		1.3006		0.9643	1.1221			1.2114	1.1301		1.4823		
44028	0.8541	0.8797	0.7315	1.2708	1.9416		2.9107	2.0156	1.9884		2.0191	2.0923	
44029	2.18	2.8104	2.2433	2.6932	1.9097	3.2077	3.4256	4.2166	3.4659	2.7548	3.3347	3.6648	
44030													
44031													
44032													
44033	1.7003	1.7798	1.3461	1.5256	1.6706	1.7002	2.4396	2.2162			1.6295	1.6658	
44034		1.1451	0.9251	0.8286	1.5067			1.6968			3.1476		3.2319
44036													
44037													
44038													
44039													
44040	3.0805	7.0745	3.0095	3.4249	4.1533	4.2703	5.8559	9.6007	4.2706	4.3566	2.8323	3.6425	6.495
44041	1.3538	1.837	3.0255	1.5948	2.0737	1.5928		2.2992	2.0083	1.6361	2.476		3.6892
44042						1.337		1.4873	1.2987	1.1431			
44043		1.0092	0.797	1.0788	1.5153	1.7177	2.3096		1.3886			1.5089	
44044													
44045		0.901								2.2979			
44047	3.3341	4.2084	2.5217	3.1877	4.104	6.5804	5.241	9.1895	6.4904	7.1672	7.4954	4.3219	9.1855
44048	6.2978	3.8645	3.8906	6.9205	5.6672	12.9344	10.4624	9.1422	12.536	11.1044	12.278	11.9751	10.8671
44049													
44050	0.8081												
44051	4.5129	4.3198	5.0759	5.4711	5.3749	11.5383	45.1392	7.2108	5.979	5.4985	7.1191	7.5021	5.005
44052													
44053													
44054	3.8341		1.3949	1.8754	2.4722			1.1687	1.3566	1.5639		1.316	
44055	0.9384	1.8485	1.084	1.4456	1.6394	1.222		2.3152	1.8724	1.4855	1.9223	1.5752	
44056													
44057		1.5823	0.7661	1.2591		3.1014		3.4203	1.5647		2.662		4.51
44058													
44059	1.3106	2.0346	2.1263	2.3166	2.5296	2.6614		3.431	2.179		2.6725	2.8716	1.9571
44060		1.2775	0.9283										
44061													
44062	4.0919	4.1155	4.1971	4.9732	6.0444	6.655	6.4735	8.2468	6.0856	4.687	6.3429	5.8832	8.2307
44063	1.5217	1.693	1.8613	2.2754	2.4086	2.01	2.2777	2.8045	2.6	2.0659	2.3629	2.53	1.8194
44064			0.8249										
44065													
44066	44.7681	40.7264	35.7358	29.1452	41.5024	26.2275	13.9993	24.5875	13.989	13.9054	16.8882	21.7637	10.1094
44067													
44068	9.3735	12.3263	2.8191	4.403	9.4842	14.4764	19.4141	23.5819	27.0526	18.2706	23.5778	25.4768	27.6649
44069	2.312	1.8364	2.1195	5.8353	7.8289	14.7336	7.9436	8.3389	7.0772	3.6471	7.911	7.7109	4.2045
44070													
44071													
44073													
44075	22.3846	12.8618	42.6992	40.1256	34.4248	55.5583	73.8643	42.2446	34.4977	53.981	65.8276	40.6958	51.9581
44076	1.4937	1.5494	1.355	1.759	1.7269	2.4872	2.421	4.7027	2.063		2.9886	2.189	5.4303
44077	2.0479	2.7193	5.0601	5.2635	2.8715	10.1025	7.7611	13.497	6.2505	4.6184	10.8714	14.4949	3.0127
44078													
44079	1.2384	1.211	1.9182	1.9937	2.06	2.4519	2.7941	2.3655	2.3697		2.5969	3.1093	
44080													
44081													
44082	3.0805	4.7297	5.9019	6.84	4.1846	11.2097	12.0752	9.0553	10.025	6.0533	13.4327	7.5238	14.8057
44083	2.3679	5.3055	2.7244	3.0865	3.7726		5.4921	3.3621	5.2841	4.9102	7.5703	4.9444	4.9859
44084	1.5859	1.6556	1.5027	1.2676	1.6621								
44085	1.5449	1.7779	1.6796	2.0293	2.4093	2.956	3.1016	2.4907	3.1799	3.624	4.2087	3.2373	3.2145
44086	2.2255			0.828		1.0637	1.5612	2.9193	2.4805			1.7749	
44087													
44088		0.8977											
44089	137.282	181.5318	69.1821	243.3456	225.5373	200.432	455.9447	323.0393	318.1711	187.4519	286.5932	330.4495	287.5059
44090		1.3975		0.7377		3.0769	1.2957	1.175	1.4292		1.44		3.0444
44091													
44092	2.3514	2.6037	3.0713	3.2678	4.6451	4.9388	5.8291		6.1804	5.8475	7.8764	8.1278	3.3742
44093				0.8403								1.5213	
44094			0.7381										
44095		1.6986	0.8925	1.2186	1.8728			2.3548					
44096	2.2759	3.5571	1.3408	1.6907	2.4319	2.07	2.4139	2.1841	3.3057	3.7939	2.9804	2.0609	2.4082
44097													
44098	1.2902	1.666	1.3297	1.497	2.1127			1.352	1.3495			1.5133	
44099	2.8632	2.9347	4.3439	5.2136	5.2288	1.951	1.9381	1.5162	2.1184		3.0611	3.5297	
44100	10.4147	10.1577	9.9569	10.6705	10.9685	2.2372	1.8576	3.5142	2.5688	3.129	3.3022	4.9739	1.8715
44101													
44102													
44103			3.8572	1.3023	5.2892	5.6925	10.5183		4.3298	2.2086	3.1746		
44104	1.5641	2.2041	1.7471	2.1642	2.057	2.2275	2.6068	4.0887	1.9732		2.3271	2.0017	2.1612
44105													
44106	2.6757	2.7798	3.7378	3.6374	4.4878	4.0244	4.8617	3.7896	3.5365	4.0552	4.0381	4.3418	4.6376
44107													
44109													
44110	20.0738	22.9739	20.5405	13.8225	33.5597	27.069	44.1471	29.5294	31.4534	37.5447	44.1975	25.2191	65.0593
44111		1.3896				3.626							
44112	0.9296	1.094	1.116		1.2093								
45001	1.9594	2.2268	1.9892	2.1525	2.2074			1.4668					
45002	11.4796	3.6717	35.7287	25.1079	58.3961	18.7979	72.8191	22.0358	65.1586	52.8602	51.6103	46.8057	28.3584
45003			0.8259		1.106								2.2139
45004													
45005	8.8039	7.6777	7.2932	10.3696	14.4021	230.6056	287.3794	282.0375	368.7748	281.6877	407.0242	447.3268	1001.1214
45006	1.7439	2.2029	5.2472	2.2944	3.089	8.8266	2.6764	3.7365	2.444		2.8299	3.0552	3.0077
45007		1.3998	0.8395	1.384		2.1244	2.5929		2.5012			2.4795	5.0882
45009													
45010													
45011													
45012	29.5779	26.6996	23.5321	33.8847	41.0765	17.4564	17.2222	22.1553	21.4021	16.3951	25.626	28.2976	63.969
45013													
45014	0.9592	0.9941	1.5165	1.2501		2.0912	3.5479	1.1672	2.5939	2.0666	3.0085	2.6286	
45015	1.4886	2.0667	1.8938	1.6099	2.0154	2.148	2.4226	2.1526	1.661	2.3293	2.2672	1.8807	
45016													
45017													
45018													
45019	9.3807	7.8761	7.6729	10.3212	16.4159	230.8631	297.9792	275.8621	254.5525	206.5231	301.5972	315.8728	600.84
45020													
45021	2.1447	1.7844	2.7664		3.487	5.0237	2.9774	3.5865	3.5674	3.7204	4.401	4.4205	3.312
45023	8.225	11.0629	11.7197	11.2425	13.6102	12.2946	17.9004	18.1634	14.2726	12.0745	14.8917	14.3367	9.7734
45024	1.9565	1.5564	1.8996	2.0339	2.2911	3.1788	3.6721	2.8974	3.498	2.8349	3.9844	3.2449	
45025													
45026	67.6647	62.7501	54.9955	82.5701	100.8025	8.3732	11.1958	12.7571	10.9755	7.8162	10.891	13.2746	25.851
45027	1.6961		0.9775	1.1565	2.45								
45028		0.7783		0.7486		1.2564							
45029		0.9598								1.3757			
45030													
45031													
45032													
45033	33.8731	28.2598	26.5174	36.0333	49.1364	97.8486	114.5705	119.2433	105.9234	86.3975	116.8925	126.8578	242.1899
45034	10.4884	17.3004	54.0002	31.8358	25.9277	42.9294	20.0693	23.2568	9.4336	27.4832	11.5978	20.5953	31.4414
45035													
45036	1.0707	0.9099			1.3125								
45037													
45038	1.804	1.6844	1.7146	1.2993	2.3766	2.8788	4.572	2.693	3.6866	2.802	4.0442	2.6993	
45039													
45040	69.1069	62.9204	52.217	74.4058	111.5516	2.8052	3.6529	3.4546	3.5354	2.9424	3.0456	3.4612	10.6799
45041	1.3745	1.4992	1.2051	1.2603	1.5541	1.8881	1.7348	1.9459	2.0612	1.6866	2.7883	1.8419	
45042							1.8965		1.2972				
45043													
45044													
45045	2.8171	4.8976	2.041	2.7462	3.5218	6.9064	5.8696	7.5589	6.6345	7.4189	6.7436	4.6132	4.6357
45046													
45047	42.7889	36.3962	32.7532	43.8517	61.6967	25.7125	30.428	28.0829	34.3355	25.7572	27.8436	33.662	71.5206
45048							1.2994						
45049													
45050	1.6371	0.8323		0.7936	1.9463	1.2088	1.5272		1.275		2.4826	2.4298	
45051													
45053													
45054	9.5321	7.4293	7.734	10.2753	14.217	285.9842	349.2001	347.6713	338.7198	267.4477	381.9824	373.5638	784.1537
45055		0.9856								1.7481			
45056	1.4373	2.2757	1.8395	1.8569	2.0969	2.3524	6.8322	1.7459	1.2605			1.3639	
45057													
45058													
45059													
45060													
45061	117.474	96.9006	98.0123	121.0361	175.8019	13.957	18.7208	18.7309	18.0888	14.2376	18.0177	20.4276	43.5455
45062	2.9213	3.1187	0.9987	1.7661	4.4414	4.0706	4.6241	10.3662	7.7314	3.2462	3.5417	4.5319	4.514
45063	1.0113	1.3251	2.2755	1.858									
45064													
45065													
45066								1.1426					
45067													
45068	9.3235	8.5367	8.0014	10.6892	14.5702	238.2654	261.8883	285.8244	233.9337	210.2943	283.7815	300.9609	542.7197
45069													
45070	0.9186	1.3103	1.1561	1.4313	1.2731	1.8598	2.7323	2.0958	1.9014		2.5645	2.5011	
45071													
45072	1.7636	1.279	4.2448	4.7441	2.3125	2.5019	2.5546	2.8992	2.0459		2.6156	2.266	
45073													
45074													
45075	68.4203	55.1068	57.8546	87.5281	124.8815	3.3285	4.8115	4.2835	4.1223	3.4656	4.3532	4.245	11.8599
45076	2.2708	2.0328	2.2891	2.5858	3.3034	6.8891	5.0332	6.0556	4.0552	6.4028	5.6453	4.0483	11.1159
45077	12.779	15.4209	18.1845	16.9062	20.3804	18.7773	32.4193	22.035	22.7916	18.5278	23.8311	21.4447	15.3761
45079													
45080													
45081													
45082	47.4098	38.8651	40.6937	53.5407	77.3966	131.7785	184.3489	189.8712	146.0547	121.7365	177.3086	174.4608	427.0309
45083		0.8082											
45084	1.0738	1.649	1.0866	1.582	2.2683	3.3783	4.6217	3.8514	3.058	3.6247	4.4279	3.2671	2.9522
45085													
45086													
45087													
45088													
45089	13.9403	10.8222	11.945	15.2931	22.6355	309.1324	413.8961	370.9099	384.4666	305.8462	467.4025	461.9388	948.7805
45090	1.1756	1.4324	1.5055	1.6757	2.2488	1.5661	3.3019	2.5551	2.2522	2.52	3.1309	2.2098	
45091													
45092	26.358	25.09	27.7626	20.4309	26.191	12.1834	8.3617	16.039	7.9401	11.1444	12.9883	14.7608	7.0024
45093													
45094													
45095													
45096	33.5844	23.6307	29.8149	34.8704	51.2511	22.5402	27.2752	26.4188	27.8272	21.6241	24.6673	30.8049	72.1235
45097	1.9214	2.2618	3.0156	2.4227	2.7363	3.3641	4.6812	3.6043	4.0058	2.9921	3.6616	3.1554	2.2401
45098				0.7979					1.4851				
45099													
45100													
45101	1.6826	1.5647	1.8469	1.6985	2.1282	1.7672	2.2665	1.4519	1.6639		2.1265	2.0388	
45102													
45103	9.6518	6.7293	8.8578	11.3791	14.6693	183.8928	240.8616	222.0915	159.2224	147.0757	174.5502	204.3032	355.279
45104	33.7856	29.7918	33.1858	43.1163	40.3596	89.3012	41.5552	38.9392	44.1579	20.1397	45.6871	56.593	28.0773
45105		0.9097	0.8199										
45106													
45107	1.0571	1.3531	1.6243	1.5419	1.8103	1.3673	1.9437	1.7913	1.6554		1.6656	2.4697	1.8992
45108													
45109													
45110	97.4169	80.0873	86.3364	102.5092	147.9544	8.636	10.4154	10.5082	10.7218	8.6712	10.441	12.4268	27.6154
45111	1.8132		0.8981	2.4403	1.8169	2.379		1.9185					
45112	1.4692		0.8521	0.8474	1.6735								
46001	2.0154		7.2431	5.0617	15.4819	3.7018	20.3627	4.0579	20.2321	13.1808	14.8674	10.0469	5.4666
46002	6.9588	9.9625	0.7922	3.8058	2.2202	6.2294	3.9596	2.1095	6.1712	11.4547	4.7387	5.2829	7.8333
46003													
46004													
46005	10.3305					1.6979			1.8837				
46006						1.1906	1.5198	1.609	2.2319	2.8134		1.4039	
46007													
46008													
46009							1.681						
46010													
46011													
46012	5.0447	5.8724	5.871	7.9026	8.1467	10.6104	10.8399	10.1439	10.2071	7.3115	10.2842	9.5143	7.7066
46013	2.6319	12.5236	2.8177	6.542	9.2409	4.7066	4.1887	29.5007	6.7224		9.9674	8.6185	11.1163
46014	1.4286		0.9612	1.3482	2.4658	1.8286	2.4309	3.639	2.4854	2.1554	3.1024	3.1657	4.1286
46015						1.3101							
46016													
46017													
46018													
46019	2.0595	3.4651	4.7774	6.8649	2.6016	4.8807	3.9825	4.4158	4.1026	2.4906	3.3438	3.1544	9.4232
46020	2.9911	1.3645	1.4414	2.9753	1.8613	1.2589	2.3841	2.0121	3.0331	2.6559	2.8839	2.3566	
46021													
46022		2.3753	2.2792	2.5985	3.2689	2.7886	3.6661	3.115	3.1888	3.0451	3.3008	3.7198	1.8697
46023													
46024													
46025													
46026		0.8468											
46027	31.0324	38.1434	29.449	38.7156	47.2701	47.3804	82.767	59.4383	57.6491	55.1086	92.1227	62.0454	133.0684
46028	7.9876	17.3295	11.1519	22.9194	11.1381	5.7761	2.4427	6.7525	3.4573	8.4046	5.1758	5.7156	2.3503
46029													
46030													
46031	1.3997	1.1825	1.7227	0.7473	1.187	2.1485		4.993	1.9192			2.0784	
46032													
46033		0.9398		0.6753									
46034	1.1076	1.3877	1.2613	0.9158	1.312			1.2482					
46035	2.2625	4.9043				5.4402	1.7193	7.8121	2.6927	4.0612	3.6486	3.436	6.2362
46036													
46037													
46038	1.3449	1.6832	1.6952	1.5193	2.0908	2.4109	2.9336	2.197	2.3254	2.1293	2.6172	2.7772	
46039													
46040		1.2569	0.8123	1.331		2.1201	1.2167	1.0416	1.3292		1.8979	2.6441	5.9782
46041	7.9879	12.6135	17.5618	15.3544	14.6313	10.7921	13.5144	19.6401	11.9134	14.849	17.8925	13.7944	13.3016
46042	3.5398	5.9372	2.0219	3.5417	2.3569	67.2519		2.9111	1.8269			3.9935	
46043	1.9142		1.3258	0.7156									
46044													
46045		0.7344	0.8196										
46046	1.5876			1.7307	1.9401			2.429		1.8888		1.6504	
46047	5.6286	9.9717	4.1893	5.3417	7.1519	4.1595	3.9629	6.3783	5.3767	5.8742	8.1771	5.6567	2.3108
46048	4.7833	6.774	5.5703	5.7147	5.8483	6.7327	8.1937	13.3573	8.4152	9.22	8.8434	7.1007	7.101
46049													
46050													
46051			0.7044										
46052				0.8531				2.0776					
46053	3.6683	3.1615	1.76	3.4192	4.5394	2.1397	2.0165	3.3727	2.4784		3.0178	2.4354	
46054	3.2043	3.8125	6.6123	6.3049	5.469	6.6924	8.6358	6.6264	4.3432	2.5271	5.7902	7.0382	3.5608
46055		4.8137	2.3855	2.4669			1.307						
46056	1.6932	1.4761	1.9404	1.8099	2.4259	1.518	2.2567	1.5699	1.5528		2.4424	2.4898	4.6671
46057	0.8136			1.3902	1.6786	7.1942	5.1003		2.9088		1.5029	2.4028	12.6868
46058													
46059		1.7175											
46060	2.2353	2.7933	3.0452	3.2273		4.4666	5.44	4.4033	3.3834	3.374	5.1827	3.9004	
46061													
46062	1.3974	0.818	2.1718	2.1311	1.5171	1.831	1.6482	2.4621	3.089			2.7749	2.5619
46063		0.7732		0.7902	1.161			1.3016			1.4673		1.8834
46064													
46065													
46066													
46067	15.7019	3.7951	3.7309	3.4778	4.1512	4.4982	5.2848	6.676	5.0767	2.8589	4.3433	4.3814	
46068	3.3532	3.8498	5.0241	5.4265	4.892	4.9197	7.2756	6.1691	4.295	3.2397	5.3592	7.0272	2.5919
46069	2.7025	1.4285	4.9074	5.1592	3.0843	5.187	6.8409	2.8712	5.7193		3.7214	5.4073	
46070	3.4831	4.2557	4.6828	5.3693	6.0464	8.5702	13.0282	9.5116	9.174		10.6454	10.2796	4.0264
46071													
46072	1.9761	1.2856	4.0581	2.1299	5.894	2.4894	12.6216	3.5012	8.949	6.5655	12.2101	6.0432	4.4133
46073			1.1151										
46074	0.9811	1.3024	0.8545					1.2573					
46075	4.0537	5.4066	2.6899	7.6228	4.8359	2.3499	6.3247	4.4998	7.2976	4.3075	4.694	4.5765	4.1206
46076													
46077	7.4391	7.99	5.6047	7.6723	10.1797	9.9528	12.258	9.5527	13.0251	13.4032	15.4191	10.819	30.6321
46078	2.2766	2.6141	2.7998	2.6838	2.96	3.2766	4.9567	4.0122	3.9687	3.6392	4.4643	4.3754	2.0423
46079													
46080	0.8895	0.9394				1.7053		1.5121	1.3897				
46081													
46082	4.1379	5.9061	4.5773	6.0695	7.2591	8.215	10.174		13.6723	12.1026	10.6615	14.7614	11.2381
46083	1.1127	1.8405	1.2441	1.4791		1.3518	1.7437	1.6474	2.1331		2.1774		2.0399
46084		1.1188	0.8331	1.1647		1.3635	1.9885	1.9633	1.4709			1.4468	
46085	1.1393	1.2814	1.6003	1.9124	1.8752	2.1505	2.9313	2.6805	1.8905		2.0059	1.9745	
46086													
46087	49.5521	47.4237	52.3925	28.8879	43.9864	12.241	10.7575	22.5846	10.3998	16.0207	17.2104	23.1106	
46088	9.3266	9.5736	8.7234	6.6233	9.0477	5.1999	4.5357	5.1981	3.6294	2.9361	4.6721	5.3618	2.4964
46089	2.7274	1.6582	1.4815	2.2143	1.8916	3.2476	2.8164	2.6049	3.1293	3.8599	4.2955	4.3479	2.8302
46090	7.6509	13.8987	6.0697	6.9509	8.5826	22.3734	23.5205	31.3419	20.2319	13.9031	16.805	12.591	21.5603
46091	2.6643	8.5761	7.2174	1.5804	1.9571	5.0728		19.9122	2.2017	4.4928	31.4947	3.1997	30.9479
46092													
46093													
46094	1.9107	1.7226	2.1324	2.0805	2.6102	2.6963	3.7695	3.0873	2.7379		2.3162	2.9129	
46095		0.9463	1.1174	1.1116	1.301	1.689	2.3311		1.3733		2.0074		
46096	11.3451	15.3469	17.2615	15.6022	15.4068	13.5451	23.6341	29.1185	26.7849	32.3805	35.8221	22.4048	36.3205
46097	15.8777	14.7275	10.7378	13.3946	14.807	11.6253	8.0449	14.1076	9.4689	13.012	9.8258	9.9952	15.9492
46098	3.2821	3.0897	3.2006	4.2851	3.9534	4.3169	5.8344	3.9779	4.7831	4.1152	4.1658	3.6167	5.2337
46099													
46100	1.5049	1.6814	1.557	1.6891	1.519	1.5384	2.5993	2.0607	1.6989		1.6933	1.818	
46101	3.3608	3.667	6.0672	5.1781	5.1709	10.5873	10.9088	10.4042	6.2501	5.4342	8.2392	12.1915	
46102	2.785	2.1579	2.5479	2.4304	2.6951	4.2827	4.1267	3.6714	2.897	2.4418	2.9084	4.9849	1.8512
46103	1.7948	1.7829	1.0288		1.516	2.8732	2.2163	2.0943	2.7289	2.3648	1.7426	2.7424	
46104		0.8565	0.6853	0.8504				1.0755					
46105												1.16	
46106													
46107													
46108													
46109													
46110	3.7418	3.0895	2.5596	2.2058	3.1496	1.8658	2.8123	2.7478	2.9248		3.0544	2.4482	3.1287
46111	2.7816	2.9993	15.9925	6.2531	7.2878	10.1606	4.0373	9.4606	5.6411	8.2475	4.1797	8.553	
46112	3.1799	3.7899	2.7049	2.5883	5.0706	1.7829		3.3383	4.7188	3.6376	2.5881	3.385	6.1401
47001	4.2994	5.6105	2.8641	5.2242	6.9112	4.9456	6.9859	10.4034	4.543	9.656	5.5136	7.6037	7.4211
47002	0.9316		0.9509	1.0332									
47003	1.2417	1.3336	1.2699	1.4616	1.0741	1.2732		1.1897	2.0219		1.7865		
47004	8.3942	8.7946	7.7134	5.6232	8.6692								2.0646
47005													
47006													
47008	3.2477	3.6156	2.173	2.5022	3.9481	4.4529	3.3189	4.4797	1.9543	3.0343	3.3144	2.5424	3.6853
47009	2.2027		2.5547	1.7626	2.2122	2.6228	2.4654	4.7536	2.1662		4.2674	1.6037	
47010													
47011													
47012	1.8623	1.3027	1.8199	2.2259	2.3266	2.8835	3.731	2.9973	3.5342	3.772	4.649	3.8866	3.618
47013	9.4105	10.6492	11.9271	11.0074	13.3118	4.8302	4.4361	7.3366	4.9796	5.3853	7.5835	8.4658	3.1343
47015	4.2923	5.8976	4.8617	4.2918	6.2549	5.939	4.9886	6.4957	4.3259	5.5621	5.7117	5.3219	4.1282
47016		0.811	0.9544	0.7168							2.0436		
47017													
47018			0.8477			1.7145		1.1588	1.4271		1.8586	1.5665	
47019													
47020	2.8961	2.3292	2.6481	1.9181	2.6233	1.6133		1.7211	1.3636	1.3248		2.2629	
47021													
47022	0.8451	0.8029		1.0912		1.219							
47023	3.3411	2.9861	3.1859	3.1143	4.3351	3.3204	3.9583		3.0465	4.0438	4.311	4.1858	5.8209
47024													
47025	3.8539	4.2886	3.9436	2.4187	4.1674	1.5973	2.1416	1.9928	1.9919	2.1181	2.4251	2.2101	2.2802
47027													
47028	4.5953	4.0656	3.2123	3.1711	3.3981	1.6201		2.5334	1.6296	1.9744	2.4306	2.2003	
47029	0.9739	3.6034		1.6333				1.5802					
47030	1.53	2.7243	1.4535	2.0361	2.2993			1.8423				1.4733	
47031	2.3883	2.448	6.1789	2.2833	2.8506	3.1127	1.8802	3.4698	1.3679	2.0415	2.0742	2.459	5.4234
47032	6.034	6.6997	7.3886	7.83	7.3741	11.0286	13.7341	10.6435	9.7449	7.6204	10.994	11.3547	6.6996
47034			0.7231										
47036													
47037	4.4394	7.1513	4.3201	2.22	5.3303	9.8297	4.8146	8.8954	3.7415	7.275	12.842	5.6757	9.4875
47038													
47039													
47040			0.8544										
47041	11.4066	17.0273	14.59	17.8261	20.5369	18.427	25.275	21.5098	20.9039	16.4283	18.0802	18.7801	12.054
47042													
47043	5.8751	13.1317	3.503	4.5472	6.007	7.8046	8.6408	9.5931	9.1547	6.5191	9.3417	11.7009	5.0708
47044													
47045	2.5102	4.4879	3.445	4.1123	4.9683	4.4857	7.8983	5.0079	6.06	4.0939	5.0748	5.8558	2.4432
47046								1.0523					
47047				0.8566		1.615							
47048													
47049	7.4552	4.3013	1.8899	6.715	6.2005	12.0845	12.1953	8.2408	12.3322	4.1145	2.6691	6.1197	2.925
47050													
47051	1.0628	1.178		0.8477	1.673	1.861	2.7392	2.5359	1.7283	2.3085	3.2018	2.5891	
47052				0.9413									
47053	45.964	51.1586	45.7239	32.9353	43.9127	16.0953	13.8256	22.5343	12.8169	15.5607	14.7646	18.485	6.9869
47054	1.5229	2.8921	1.7252	1.7796	2.667								
47055													
47056			1.0606										
47057	1.0698	0.9419		0.8784		1.2518							3.2859
47058													
47059	0.9502	0.9686	1.0679	0.9209	1.1294	1.4725	2.1724	1.7589	1.9354	1.9342	2.0798	1.8599	
47060	6.9321	6.2715	3.1032	4.2785	6.7272	1.8648	1.7285	2.9716	2.5821	1.896	3.2975	3.3506	1.5351
47061		0.7539	0.9334	0.9875	1.1368			1.9444	1.6696			1.444	
47062		1.4073		0.8229				1.5703					
47063			0.9875		1.6486							1.5349	
47064		1.0188	0.7756	0.9841	1.1134			1.3779			1.537		
47065	0.8065	1.4657		1.1055	1.3435	1.2732		1.6841	1.9081	1.7932			1.8941
47066						1.3132							
47067			0.8229	0.8659									
47068	3.4681	4.3806	4.9525	4.6104	5.3414	5.3914	5.7626	6.1193	3.8058	3.6574	5.3053	5.25	4.2595
47069	9.0015	10.9826	14.7793	12.8301	13.4694	13.1323	19.782	14.3777	12.9198	12.085	18.9573	15.1363	
47070	1.2328	1.6034	1.1551	1.2867	2.0199	4.6767	7.8814	3.5427	6.4174	5.2863	7.5746	5.7203	5.2662
47071	4.2265	11.5915	4.5991	3.5093	5.7242	6.7631	12.2801	17.0349	9.2416	10.0555	6.8622	7.2915	9.6389
47072	17.905	23.7717	16.5272	13.0413	16.3044	5.8022	5.6026	8.1221	5.7745	7.2014	7.5132	9.1615	4.3231
47073	1.0322							2.0974				1.2934	
47074										2.102			
47075													
47076	2.0202	2.9165	3.0237	2.2743	2.9229	3.1333	3.5593	3.2285	3.1437	1.82	3.1501	3.0462	1.8737
47077	167.7784	158.3742	158.0892	139.3645	172.668	81.7312	65.1484	102.9178	76.9752	70.5196	94.5421	109.2269	53.3837
47078								1.5975					
47079	1.1113	1.3378	1.5068	1.3005	1.8435	1.3465			1.0858	2.7408	1.5473		
47080	5.7836	5.8604	9.6679	7.6665	8.6352	9.2799	17.2368	10.2065	10.3951	7.9097	11.4864	11.4338	10.0858
47081	1.2998	1.3434	1.0033	0.727	1.0996								
47082		0.7102	0.9904	0.9078				1.2972					
47083					1.0507								
47084													
47085			1.1855	1.2216		2.1075		1.9109					
47086	3.9232	3.5215	5.4618	6.1586	6.1289	1.6205	1.8062	2.2305	2.1463	3.1746	2.7715	3.3258	
47087													
47088	2.6514	2.9268	2.6555	2.4246	3.2928	4.9205	4.776	3.2239	3.3949	3.649	3.5502	3.5181	2.0537
47089													
47090	1.2835	1.3223	1.5682	1.169				1.5221				1.3197	
47091	15.3566	18.061	22.4508	19.9405	29.5324	30.2816	47.9535	28.8883	24.4642	20.5616	29.0133	30.5297	16.3591
47092	6.5614	7.144	4.465	3.8496	10.0193	9.6948	5.3921	14.6863	8.0361	8.1956	10.5604	6.3112	13.9315
47093		0.7825						1.628					
47094													
47095	3.5428	3.5882	4.6868	3.7328	4.0759	2.1056	2.1021	2.6504	1.7209	2.9653	2.8893	2.9615	1.6282
47096													
47097													
47098	1.9021	1.6584	2.2502	2.0293	2.5517	2.2375	1.6511	1.9249	1.8466		1.7919	2.005	
47099	7.6252	19.1215	8.9822	7.9592	8.1296	8.847	8.1471	5.1468	12.3254	7.9485	14.1211	9.4967	15.8455
47100		0.7766											
47101	1.4858			0.8582	1.3358	2.1454	2.1991	1.6022				1.4476	
47102													
47103	3.4475	4.0984	4.9626	5.0705	3.62								
47104													
47105	1.2192	1.1494	1.0894	1.3615	1.5711	1.4302	1.7756	1.2112	1.4385		1.9786	1.9262	1.7783
47106	1.8335	1.1382	1.4848	1.2184	1.8387	1.326	1.6179		1.3643			1.7965	
47107	0.8301		1.5421	1.166									
47108													
47109	3.9534	4.9668	5.9516	5.7446	6.9597	5.1448	8.9426	7.6654	5.9027	6.5316	6.2438	7.8924	5.1355
47110		1.0679											
47111				0.8076									
47112									1.2645				
48001	14.0491	13.4692	7.2983	10.0811	5.5198	9.7256	6.331	10.208	11.4231	15.9052	10.4452	10.1225	42.272
48002		0.8604	1.046	1.2396	1.949	1.2755	2.2384	1.1687	1.761		1.5878	2.0551	
48003													
48004	2.8545	3.3317	4.188	3.5479	4.3408	3.0753	2.8789	3.6961	2.8995	3.4683		2.8072	2.3621
48005													
48006													
48007				1.334									
48008	1.6541	1.5479	2.1207	1.748	2.6047	2.1715	2.2312	1.7155	1.9702	2.0535	2.0281	2.0004	
48009		1.1139		1.2607		1.2941		2.0381	1.3754		1.568		
48010	1.1489			0.8969			1.6675	1.5021	4.1658			1.6007	
48011													
48012													
48013			0.6857										
48014	181.1035	6.3809	2.9781	1.9739	4.2964	15.6837		23.1497	18.6125	2.7495		3.349	
48015	7.084	10.0375	8.1519	9.3186	9.6371	16.122	11.3721	15.1008	15.6282	21.5631	15.2439	13.7649	36.6667
48016						1.5969	1.6895						
48017													
48018	1.3472	1.3442	1.081	1.3545	1.5928	1.5323	2.4851	2.1752	2.3714	2.159	2.0696	2.4067	
48019	2.9651	3.7013	3.9668	5.5229	4.3793	7.1798	8.4453	8.0349	7.5292	7.3349	6.8396	5.7385	12.2236
48020													
48021													
48022													
48023			1.4953	1.1029	1.3039								
48024				0.7846									
48025													
48026													
48027	3.0489	2.7108	2.9116	1.8273	3.4285	1.2306		1.911	1.8495			2.1351	
48028													
48029	14.3994	17.165	8.6883	10.3899	12.204	19.2005	13.2827	24.682	14.9589	20.8377	26.0076	19.1727	35.7967
48030	1.2277	1.6365	4.0937	2.9129	3.9737	3.6813	9.4084	2.5377	6.0746	3.2881	6.3076	4.596	2.6923
48031					1.0655							1.2875	
48032	3.3126	11.2668	6.1632	12.7798	8.3099	14.9224	13.2725	14.3033	10.8756	7.9337	12.5306	11.1351	13.8214
48033	3.0172	3.6503	4.4547	4.2816	4.6844	4.5267	5.3595	5.1848	4.2658	3.1002	5	5.2792	3.4644
48034	27.5179	31.3001	26.5538	19.9373	24.5284	9.9262	9.3761	14.8183	9.3528	11.3857	13.6391		7.6931
48035													
48036						1.2647							
48037	2.6705	3.2832		2.8924	3.3179	1.9948	2.8886	4.7757	1.684	3.962		1.3528	6.6553
48038													
48039	0.9801		0.9014	0.7961			1.3556			1.4553			
48040	2.6656	3.0732	2.166	3.2677	4.2241	16.1667	10.2249	10.7871	10.4835	9.0621	12.6963	9.7968	7.3959
48041	6.394	7.6816	6.9384	5.0074	7.1433	2.7311	2.8307	3.4257	2.8476	2.572	3.2799	2.9319	2.9746
48042	2.047	3.4389	3.0335		2.9802	2.2782	1.4821	2.8212	1.8181	1.7401			3.9462
48043	14.2306	19.1837	16.8165	16.652	23.5633	19.4897	24.4521	20.3661	21.7058	20.6213	27.1415	20.8334	8.9056
48044	14.0614	32.7424	4.4408	7.2326	14.936	6.9214	17.7148	11.7524	10.4362	9.6994	10.2832	12.2731	16.2845
48045													
48046													
48047										1.8937			
48048	1.5685	2.0576	1.785	1.6465	2.4901	5.4694	3.0383	1.748	2.2018	1.8144	2.0418	2.2219	
48049													
48050	1.4488	1.402	0.7359	0.9006									
48051													
48052	1.1509	1.5721	0.8329	1.1612		1.7497	1.4553	1.7266	1.4817				
48053	1.3743	1.9011	2.1536	2.3207	2.059	2.3555	2.9484	2.623	2.0277	1.7701	2.7904	2.6502	
48054	0.9729	1.2648	0.7074	1.1482	1.2357	1.6293	1.5289	1.949	1.592		2.1893		
48055													
48056	1.1493	1.0524	1.09	1.1613	1.1636		1.9208						
48057								1.1068					
48058	2.587	3.0036		2.7244	2.6467	3.2372	2.9212	4.6768	3.0249	2.5774	2.382	3.4975	2.6716
48059													
48060	3.2518		2.86	1.3253	2.0342	1.6238	3.3133	4.8516	2.9121		6.5658	2.3612	8.2063
48061													
48062	1.5898	3.0267	1.7931	1.4694	2.2178	1.8401		1.769	1.4907	2.4556	2.7174	1.8011	2.2697
48063													
48064	1.4703	1.4702	0.8626	0.9832	1.9192								
48065													
48066			0.7268							1.647			
48067													
48068	2.1603	1.2431			1.3514								
48069													
48070													
48071	15.6111	16.1749	8.6563	12.6212	9.5221	14.8357	12.5366	13.6325	16.0906	18.8874	14.038	15.1002	36.0518
48072	1.4366		2.3549	1.2411	1.7985	2.0177	3.447	6.2506	2.0243	3.6568	3.6744		
48073	0.9503			0.7339									
48074	1.0855	1.2518	1.3193	1.2045		1.3102		1.2662					
48075													
48076	2.0366	4.0567	1.4319	1.846	3.6704	2.3121	2.1374	4.2968	2.1343	4.4819	4.0532	3.9166	
48077													
48078	3.7467	4.3027	2.2903	4.1379	4.8025	11.936	4.728	6.9664	4.8871	5.0117	5.5701	4.1129	4.5829
48079													
48080								1.4587					
48081	24.9244	32.3068	37.8924	34.7392	41.8945	49.2662	67.6357	49.5646	49.061	38.2015	52.441	50.0467	32.8236
48082		1.1891	0.8423		1.1992	1.5219	1.753	1.5263	2.1734			1.7631	
48083		0.8352						1.4855		2.4373	1.5513		
48084													
48085	28.4875	47.4074	26.8133	29.123	42.07	43.2757	28.954	59.4039	53.921	37.1966	48.1074	27.7971	90.6166
48086	4.8576	12.8091	36.3248	43.3269	31.3748	26.059	151.6436	20.9195	66.3981	22.7361	56.6656	24.7902	43.4045
48087		1.1933				1.1199			2.4923				
48088													1.3855
48089	0.8295	1.0575	1.9023		1.5338				1.0151				
48090	187.3408	165.949	213.3991	165.5009	201.5647	75.9773	70.2478	109.6568	66.9519	99.2693	127.2043	129.254	55.5706
48091	1.0391	1.0679	1.239	1.4596	1.2707		2.2869	1.3285	1.6042			1.4198	1.6737
48092								1.5821					
48093				0.7589									
48094						1.0645		1.1602					
48095	0.9958	1.0148	0.9199	0.9371	1.3967	1.3355		1.5786	1.9681				
48096													
48097													
48098			0.8126	0.7914									14.2637
48099	16.0809	14.2979	8.0058	13.3839	13.5076	22.3899	17.6338	22.1346	22.0886	16.7928	23.4721	13.4357	45.2069
48100				0.8773									
48101						1.5337		1.8436					
48102													
48103													
48104	4.2416	8.5486	2.5966	8.8625	6.8399	1.9948	3.6205	11.8374		5.6049	3.2673	4.9194	3.8966
48105	1.6411	1.907	2.2399	2.1736	2.2779	1.1035	1.8642	1.8448	1.5586			2.4728	
48106	0.9708	1.6743	2.2195	2.0511	2.2156	1.5313	1.6393	2.2156			1.5994	1.8825	
48107	9.4244	1.7444	4.7133	2.2491	1.933	0.942	2.8114	1.8919	2.1359	2.4409		2.6307	
48108													
48109	1.0029	1.2767	1.0631	1.2628		1.5515		1.3806				1.6296	
48110													
48111	18.424	18.6091	22.2674	16.2564	20.289	5.2101		6.4785	4.7171	5.4084	4.8757	8.5493	4.4902
48112				0.6812					1.5616				
49001	3.4111	3.6156		1.1687	1.8423	4.353	1.6129	2.1422	1.6296	1.825	4.2914	3.9032	4.8899
49002			10.9916						1.7444				
49003	1.4366												
49004	9.988	9.7683	10.028	7.3187	10.378	2.6342	2.0639	3.154	2.4819	3.3978	3.421	3.9109	
49005													
49006													
49007			0.6554										
49008		0.9854	1.7561	0.9633		1.6785	1.949	1.7722	2.5585	1.7828	2.6432	2.8485	
49009	3.235	5.7286	6.8048	5.0195	6.8368	5.8025	8.2289	6.1342	6.2971	6.1795	6.4014	6.7579	2.6822
49010	2.2435	2.0899	2.209	2.3901	2.5151	2.7475	3.1103		2.5321	2.9428	3.5265	2.6367	
49011													
49012	0.9461	0.8864					1.4488		1.3524	1.7303		1.4067	
49013	1.2309	1.8329	1.6766	1.7551	1.9934	2.5647	3.2702	3.4685		2.546	3.4541	3.6819	
49014	0.9613		0.8298	0.8479	1.1646			1.3813			1.8174		
49015													
49016													
49017													
49018	1.0779	1.385	1.1084		1.3405	1.083			1.3265		1.8289		
49019													
49020	1.2563	0.9345	1.1567	1.3313	1.3554	1.2367	1.6474	1.4762	1.5983	1.3406	2.0188	1.9512	
49021													
49022		0.7081	0.9619	0.7624						1.3138			
49023	2.1422	2.1738			1.6994	5.8474	1.8919	3.3871	1.9001	1.8772	2.6664	2.9734	
49024			1.5012							1.2618			
49025													
49026									1.2666	1.566			
49027		2.2849	1.0613	0.9358	2.356	1.0258		1.4319					
49028	4.6767	7.2017	5.3243	7.6769	7.8125	1.7313	2.5868	4.1488	3.0528	3.743	5.9529	5.3695	
49029													
49030													
49031	2.5225	1.682	1.5057	3.2002	3.13	1.8084	2.6099	2.0609	2.2649	3.1459	2.2422	2.8232	
49032													
49033	2.7239	3.6269	3.6919	4.2131	4.038	4.5215	5.7725	5.7511	4.3194	3.8369	5.7537	5.7316	2.3066
49034													
49035	3.5525	3.8433	2.4321	2.7191	3.2974	1.37		1.6489			1.5064	2.2109	
49036	1.2175	0.9639	1.0979	0.817	0.9207								
49037	1.6531	2.2481	3.1936	2.7837	3.6784	5.8385	11.4088	7.508	4.5102	2.7213	4.7885	6.9726	2.3736
49038	5.2646	5.63	7.0668	5.4455	7.1235	6.2722	7.7532	7.425	7.1809	6.389	9.0757	7.2126	5.4623
49041	11.635	13.1193	11.6865	13.3743	14.623	6.8628	7.0277	15.0908	7.2099	7.1345	8.8471	11.2411	2.6374
49042													
49043	1.2741	0.8537			1.1857	2.2907	1.7152	1.8442			1.8164		
49044	2.7251	3.7747	3.3464	3.0687	4.2839	4.3871	4.9962	5.5641	4.3372	3.6823	4.7839	4.7655	4.0009
49045									1.0817				
49046		0.9526											
49047	15.4517	18.1082	12.3013	17.1513	18.4072	23.5354	27.1199	26.7387	25.8258	22.8406	25.298	25.6325	17.8306
49048		0.8978		0.9715	1.507	2.2098	2.4503	2.3594	2.2998	2.2977		2.2489	4.4146
49049													
49050													
49051													
49052	1.1656	1.4236	1.5215	1.3954	1.7464	1.7941	2.0737	2.4973			2.6715	1.8166	
49053													
49054	19.2647	23.3845	27.2545	21.8283	22.7484	9.6781	8.887	14.85	8.0101	9.27	10.5212	13.7111	3.9379
49055	1.0933	1.5791								1.97	1.4773		
49056		0.7129	1.4185	0.8406	1.3713								2.7626
49057		0.7261	1.0011				2.6025	1.766	1.8819		2.6978	2.1706	4.4341
49058													
49059													
49060													
49061		1.15	1.0091										
49062	27.5836	32.7634	15.7846	36.8139	31.4011	45.3057	82.921	64.86	49.4589	21.1477	45.1596	39.7411	33.3901
49063													
49064													
49066	2.6396	3.5834	1.4194	1.8858	4.4214			1.6664					
49067	1.4834	1.907	2.4437	3.3028	1.2759	7.4992		4.6327	8.1854		2.3945	2.3153	14.2462
49068	2.7232	3.3276	2.1468	3.909	2.7242	3.5496	4.2833	3.7885	3.1771	3.5106	4.6434	3.6155	6.1987
49069	1.3713	1.9479	1.2866	1.6238	2.1577	3.6134	4.892	3.7489	2.903	4.3641	4.9909	3.1624	3.2919
49070													
49071		1.2307				2.2353							2.2311
49072													
49073													
49074	7.1169	7.1104	9.504	9.8595	9.8423	15.2548	19.0381	17.077	14.1457	11.9733	12.9381	12.5742	
49075		1.1328		1.2543	1.0617	2.4935	5.7921		2.7489				3.195
49076	0.9005	0.9749	0.6766				1.3296		1.4216	1.6745			
49077	8.9782	11.3877	5.7995	6.9321	10.0875	17.5983	25.3744	23.3664	14.487	25.0283	22.3532	20.298	26.9638
49078													
49079				0.8337				1.0651					
49080													
49081													
49082	5.6806	7.5008	11.6565	10.6014	15.6467	32.324	61.7927	38.31	21.248	13.813	28.095	43.422	9.0179
49083													
49084		4.8335				1.4149							
49085													
49086													
49087													
49088	2.2545	2.5718	4.8901	3.1363	1.9895	1.0944	1.7455	2.4397	1.5855	2.4517		2.3211	
49089								1.3903					
49090	2.9355	2.1978	2.8522	3.1963	3.0613	3.855	4.1701	6.0231	3.5657	2.5895	3.5408	3.5438	
49091													
49092													
49093													
49094													3.1572
49095		1.4702	0.8447					1.7624				1.2747	
49096													
49097	0.7858							1.5438					
49098													
49099	5.5621	3.396	5.7765	4.8594	3.5422	1.5283	1.6486	2.181	1.5056		2.2094	3.1961	1.9957
49100				1.0448	1.1507								
49101													
49102			0.7911										
49103	1.5722	1.6608	2.0421	1.9981	2.2859	1.5339	2.1763	2.1364	1.8843	2.6394	2.3964	2.2414	
49104													
49105	3.1415	2.3819	3.0524	3.5459	1.8751		1.7517	1.4827			1.4565	2.4199	
49106			0.8274										
49107													
49108				0.7997				1.4452					
49109	8.1113	10.0314	9.7722	11.8538	13.1151	9.8571	13.9792	9.2189	11.1129	10.7619	11.8371	10.7984	10.8009
49110													
49111													
49112		0.8387		2.7156	1.6119	2.2132		1.4567	1.7659			1.4371	
50001			0.7991			1.2134		1.1035					
50002	2.5121	1.5431	2.4766	2.14	3.3313	4.5212	4.709	3.1285	3.5235	4.8743	6.4529	6.4863	
50003	3.4816	5.2634	1.7215	3.7627	2.3865	2.7987	2.486	2.0552	2.6803	7.4334	2.6065	3.451	2.3532
50004	3.067	4.2784	2.2753	1.9876	4.9555	3.7373	1.9597	3.0768	2.7599	3.1201	3.2276	2.3515	2.5142
50005													
50006	2.9859	3.4926	3.7485	4.4418	5.12	4.8081	6.0822	4.2928	4.9769	4.4483	5.2652	5.5593	5.4532
50007		1.5896	0.7971	0.9248						1.6928			
50008													
50009													
50010													
50011			1.7173			1.7619	1.3904	1.9808					4.031
50012													
50013	1.2355	2.8979	1.067	1.3062	1.6897	1.402	1.4637	1.9024	1.6709	1.9877		1.7899	2.7463
50014		1.5204	0.834	0.8343	1.3287	1.2237		1.3243					
50015	0.9582	0.9464	1.5163	1.2958	1.6287	1.1042	1.3808						
50016	74.3372	121.8831	111.2151	48.7274	180.2046	158.428	140.0261	90.4946	107.2282	73.8851	126.9423	179.3685	67.5839
50017		1.1643	0.8136			3.5169			1.313				2.548
50018	6.0981	7.5507	2.3923		6.9359	4.146	15.1153	6.2265	13.5757	8.6493	16.7638	9.7208	14.1074
50019	2.0295	1.556	3.1458	3.4083	5.0324	4.4778	14.3144	4.133	9.5045	6.818	9.1792	6.4989	4.4673
50020													
50021													
50022													
50023													
50024	25.323	34.88	23.6785	23.3667	34.1343	23.4145	40.2895	51.9198	29.5321	42.3189	39.4076	26.0833	28.1969
50025	2.2394	5.3855	1.549	6.894	5.5606		2.035	4.2494	1.8095	4.6387			
50026	1.0603	1.0218	1.1534	1.2714	1.6373	1.9661	2.1195	2.0803	1.5941	1.5166	1.4943		
50027	1.981	1.9578	2.0099	2.1658	2.1304	1.7526	1.9318	1.9919	1.9487	1.4458	2.7172	2.1097	
50028													
50029													
50030	4.7274	5.5224	6.3009	7.5566	8.1814	10.3673	13.7675	11.4493	8.2441	7.3408	8.9679	10.9938	4.5008
50031						1.1498							
50032	3.1958	4.9097	2.7885	3.3146	3.9095	4.136	4.1178	4.5248		3.6878	4.2528	4.2771	2.573
50033													
50034													
50035			0.7672			1.0798	1.5698						
50036	4.9905	7.4347	6.9862	8.4059	8.4049	10.3284	12.787	9.0887	8.8634	8.0098	8.7531	9.413	7.2251
50037	26.8216	15.0362	20.7256	19.0601	24.5343	26.998	48.0637	30.7379	38.0752	28.4341	29.0607	30.3717	51.7415
50038		1.1783		1.8415			2.2053		1.0621				
50039	2.8237	1.5774		1.3209	2.1736	1.2052	1.3132	1.6747				2.2	3.0344
50040	1.0207		0.6853			1.2428							
50041						1.1933							
50042													
50043	3.1238	3.5411	2.878	2.9393	7.1263	1.8981	2.4264	1.8425	2.9268	2.0911	2.6806	2.756	
50044													
50045													
50046	3.1499	5.5008	2.1879	3.9031	3.8949	6.6645	8.6092	6.4349	6.9521	4.7584	3.6719	4.0199	14.1387
50047													
50048	2.0646	2.4409	2.9043	2.8082	3.3541		3.9399	3.6955	2.7035	2.1507	3.7632	3.9223	
50049													
50050	2.7124	1.8496	1.5658	2.3809			1.7291	1.9353	1.706			1.9021	
50051	13.3925	14.6922	18.9198	20.1154		23.0769	44.3059	25.8312	24.8378	19.5064	27.6842	26.7189	30.9853
50052						1.2921	3.6163	3.7241	2.6944				2.2029
50053	1.7834	1.6763	1.9862	2.341	2.4913	3.7876	3.5633		2.6807	2.2488	2.527	2.556	1.9069
50054	2.2394	2.3997	2.2757	2.6248	3.1518	2.354	2.7584	2.4446	2.1531		2.649	2.228	
50055													
50056				1.4203									
50057													
50058		0.6964											
50059	13.04	16.3841	17.3234	19.7444	15.88	50.2627	38.6215	38.8787	42.7149	27.2644	33.4036	34.2453	72.1001
50060													
50061	3.6692	11.6396	1.8361	2.0951	3.26	13.8915	3.6413	12.7475	4.4694	4.0451	2.3201	6.1074	
50062	5.1025	6.1349	6.4533	6.237	7.1344	8.343	8.8856	8.2039	8.9175	7.3823	8.596	8.0604	5.2398
50063													
50064	4.3944	5.9836	4.1856	5.4443	5.5833	1.3405		2.8091		2.1859	2.9157	2.9808	
50065			0.9213	0.9443		1.712	1.5823	1.5745				1.7271	
50066		0.8599											
50067		2.1715		2.6124	1.0294								
50068													
50069			0.7855	0.8213									
50070													
50071													
50072													
50073		1.0796				1.3722							
50074	2.0666		3.2778	1.7942	2.4019								
50075	0.8127		0.896	0.9358									
50076													
50077	1.3771	1.0109	1.6916	0.8194	1.1585			1.3949				1.7969	
50079													
50080	0.997		2.8371	1.1398	1.2581	1.6529	9.1385	1.7821	23.1444	2.5327	1.777	4.3134	3.5161
50081	9.9296	7.608	7.232	13.2986	7.072	10.3733	17.405	11.2737	18.253	13.406	11.7504	8.0201	31.4267
50082													
50083			0.8283					1.5223					
50084	1.0208	2.1315	1.4346	1.7252	2.5364							2.7276	
50085	4.506	4.5699	5.5215	4.8573	4.7635	2.316	1.6012	2.7861	1.9582		1.7586	3.3612	1.5332
50086	13.3468	16.1222	19.3685	20.608	20.7918	18.7369	29.908	21.291	18.3725	16.1238	21.6649	20.8411	11.6705
50087	52.4112	12.2164	38.3965	42.3161	50.039	48.4498	63.0172	86.171	49.1157	60.881	40.9558	53.7314	29.4361
50088	1.8912	3.3008	2.0261	2.1555	2.165	2.7811	5.6189	4.5723	4.6164	4.8456	5.6805	3.2255	5.8471
50089		1.6342	1.009			1.4105		3.0103					
50090													
50091													
50092													
50093		0.7755											
50094													
50095	2.2401	2.7711	1.5386	2.6526	3.0093	3.9372	5.1416	3.3473	4.21	3.8139	3.9296	3.3319	2.5948
50096	1.8877	1.9916	1.0285	3.9244	4.4744		3.4368	1.9716	2.6912	2.8456	2.4784	3.6957	
50097													
50098													
50099													
50101	5.1643	8.0488	9.7852	20.6525	16.7539	24.6577	21.1644	35.6525	20.1786	12.28	36.7998	12.7621	34.81
50102		1.8709	0.8687	1.5957	0.9963			2.7166					1.9897
50103													
50104	4.2939	5.3974	5.6386	5.189	5.4816	6.6346	8.8211	5.573	6.0121	4.8958		6.904	3.6844
50105	1.5834	1.6478	2.9474	2.4272	2.2171	1.2317		1.3033	1.2704				
50106	0.8662	0.9528	1.2089	1.2029	1.5624	1.4248	1.577	1.5156	1.2408				
50107	3.385	3.1724	4.4684	4.3055	3.7234			1.8519				2.7045	
50108	1.19	1.7487		0.9888	1.6674			1.1847	1.3795		1.5234		
50109	3.3041	3.3837	4.0121	4.4918	5.1244	2.6688	5.2035	2.8852	3.525	3.1299	3.0452	3.2446	3.1836
50110													
50111	5.3681	7.8098	8.8997	8.7751	10.1922	10.2564	18.9807	13.3526	13.9096	10.4112	11.0253	14.4553	10.2873
50112													
51001													
51002	3.7392	3.6863	4.3642	5.3187	4.7389	2.5979	1.8375	3.7466	2.4198	3.4415	3.6281	3.9907	2.0551
51003													
51004													
51005	1.2822	1.3758	1.464	1.9306	1.7829	2.2572	2.0504	1.2644	1.939	1.7278	1.456	2.2119	2.6141
51006													
51007													
51008													
51009	5.0532	5.221	7.9502	5.6799	12.9732	2.6716	4.8613	5.0658	5.1699	6.2993	4.4258	7.3199	
51010													
51011						1.0191			1.2778		2.2197		
51012													
51013													
51014													
51015													
51016													
51017	2.4561	2.585	3.302	3.1742	3.2591	3.322	4.0486	4.3828	3.3347	3.3685	3.8989	4.4427	2.4485
51018													
51019	9.8923	8.3747	8.9562	10.273	9.1182	8.7761	7.1008	8.0421	9.9045	7.5984	7.3633	9.0354	16.2327
51020						1.2361							
51021													
51022			0.687	1.1625	1.0706								
51023	1.412	2.0131	1.329	1.4598	1.8411	2.03	2.6196	1.9125	2.4096	2.0181	2.4704	2.3022	1.8052
51024	1.5108	1.3614	1.259	1.8791	1.9854	1.9906	1.7218	1.8371	1.9493	1.3878	1.7188	2.4056	3.4243
51025	1.1675	1.3298		2.4015		2.7393	3.6532	2.3188	5.5841	2.1654	2.6693	2.1711	3.3849
51026													
51027						1.3061	1.4671		1.4486				
51028	54.3746	50.0282	56.9711	44.0839	55.4206	21.4872	19.5617	34.9082	22.2661	27.4753	32.0537	46.3328	21.7645
51029	6.2403	5.312	6.2262	5.4944	8.1542	2.4967		2.7529	2.157	3.325	3.4772	3.8226	
51030													
51031	1.6036	2.3696	1.7381	1.8896	2.8658	4.4552		4.9845	3.5794	3.475	4.1045	4.6911	1.6643
51032	2.3803	9.1271	3.9722	4.4681	5.3785	7.2159	4.7368	8.7935	6.7232	7.8005	9.6395	5.7353	16.7213
51033													
51034	3.591	4.1524	4.0028	4.1339	4.6997	7.1509	8.8617	8.2618	6.6109	6.8179	8.1451	7.4748	4.8187
51035	1.278	1.2498		0.9026	1.4733	1.1684							
51036													
51037						1.3466		2.1609				1.6328	
51038													
51039		1.94	2.0099	1.0885	1.3499			1.2285					
51040	2.5541		7.1751	2.5201		6.5311	2.4714	3.969	15.0084		3.5636	2.0634	22.8746
51041				0.7952	1.0953	1.075							
51042		1.3857				1.4996		1.6342					
51043													
51044													
51045	2.9228	3.4232	3.1712	3.2876	4.8204	6.9714	7.6214	7.3622	6.2891	8.0647	8.2147	6.135	
51046	6.4503	9.8714	3.3938	4.8194	6.5956	5.0416	6.2843	10.7069	7.9611	6.7091	6.4387	4.8604	6.4488
51047	2.5483	4.1653	2.1412	2.5251	2.5503	2.7777	2.7362	3.9941	3.0412	2.7341		2.1381	16.2877
51049		2.7557	1.3324	1.0619	1.8698	0.8806			1.163				
51050	1.3682	1.265	1.5274	1.1747	2.8358		1.6625	1.3662	1.7092		1.7115		
51051													
51052						1.0831		2.7936					
51053	1.7838	1.1859	1.6967	1.7335	2.3224	10.2684	8.4795	14.1137	6.6548	5.6321	8.3364	8.35	
51054	2.3295	1.1794	2.6649	3.7836	2.6425	1.7903		1.7225				2.3139	
51055													
51056													
51057													
51058													
51059													
51060	0.8136		0.7859										2.2175
51061	1.0389	1.0837		0.9618	1.1994	1.4678	2.1457	2.2035	2.1743	2.1035		2.0503	1.4989
51062													
51063													
51064	1.3905	2.0188	1.3268	0.8577	1.094			1.4485	1.4237	2.0822			
51065	1.5845	1.9874	2.232	1.1024	2.5172	4.1021	4.1	5.8078	2.2354	5.1541	3.7037	4.3615	1.8494
51066	8.7301	12.133	10.2058	40.5251	15.225			3.6832	2.5896	3.5558	3.4082	3.1847	
51067	2.7358	5.7181	2.036	7.6935	5.5502	2.8833		6.1905		3.8822	3.8923	3.984	13.878
51068		0.7381	0.6798										
51069	2.0934	3.6857	2.1811	2.6373	1.5752						1.4248	1.7105	
51070	0.9125												
51071	1.7376	2.2068	1.3269	1.7101	1.7389	3.8764	3.2117	2.0487	4.0255	2.8606	3.8834	3.4662	2.1509
51072	0.8338	1.0671	1.3684	1.2125	1.2159							1.5607	
51073						1.0629							
51074		1.7987											
51075													
51076													
51077													
51078													
51079													
51080													
51081	3.0395	2.9886	4.3472	7.7826		3.0502	3.4019	5.3448	3.615	2.211	1.5868	1.9719	4.1759
51082	2.3492	13.0745	7.6815	1.9213	2.1611	9.9213	18.9398	10.5954	14.2018	15.714	18.0013	9.9764	19.3715
51083													
51084								1.3492					
51085			0.7717			1.481	1.3488	1.612	1.0842				
51086	4.2452	2.8681	3.4422	3.03	1.9952	2.1928	3.3604	1.7525	2.9057	4.4986	5.5898	9.9766	
51087		0.9901											
51088	0.9467			0.8317				1.9489	1.311				
51089	1.5226	3.995		1.7363	2.4868	1.2417	1.7838	3.6001	2.4465			2.4718	
51091													
51092	10.9895	11.5894	12.5032	12.0426	13.1318	9.9119	16.4536	13.5514	9.5905	7.9378	11.9902	11.397	5.631
51093			0.8327					1.4459	1.4071				
51094			3.7796	6.6214									
51095	1.2863		1.575	1.478	1.4903	1.3286	2.3252	2.0104	3.2465				2.8787
51096	1.7702	1.4772	2.526	2.4001		3.5169	3.5452	4.2159	4.9516	2.5475	2.7616	3.2456	
51097	1.3828	1.1498	1.8802	1.5146	1.4691	2.9216							
51098													
51099								1.4435					
51100				1.3498									
51101													
51102	5.6008	8.8985	5.0818	5.2421	6.7115	11.9591	7.1945	10.8707	6.5935	7.2854	7.197	8.2791	18.6228
51103	1.3446	1.5506	2.4761	2.9659	1.7165	2.4235	3.4147	3.0566	2.509		2.3188	1.4985	3.4241
51104	7.6522	12.2847	9.962	1.9282	17.2012	12.0306	5.8636	3.0716	3.7053		3.5669	10.544	2.8811
51105													
51106				0.8222									
51107	5.5524	1.5046	26.3322	14.0347	34.6631	11.6415	63.2685	11.7445	35.7623	32.5672	36.1933	26.3105	15.2652
51108													
51109	1.3232	1.9486	2.4442	2.2802	1.7331	1.465	2.5105	1.6581	1.9568			1.7835	1.9248
51110	1.0415	1.0411	1.1765	1.0185	1.5548	1.3902	1.6219	1.3977	1.7587		1.9186	2.112	
51111	11.7792	7.9213	11.4076	7.5733	11.9892	4.003	3.0261		3.2958		3.9453	4.0418	3.6146
51112													
52001													
52002				0.9187				1.1843					
52003	1.7622	1.596	2.6209	2.6129	3.079	1.8821	2.4056	2.8992	3.6605	2.4807	2.6354	3.7019	2.6805
52004	1.1499	1.2506	1.0068	1.2101	1.1314	1.192		1.5428	1.4143			1.4502	
52005	8.7066	9.0925	2.5244	4.6546	5.6322	12.5604	6.0895	6.2461	8.8325	8.3194	13.3193	15.1171	20.0858
52006	2.1934	3.1896	1.7964	4.3717	3.4351	4.6083	3.117	2.3571	5.2904	2.7616	5.2642	3.8644	6.1947
52007													
52008													
52009												2.5599	
52010	5.8091	10.5803	7.266	3.3852	10.3898	7.8751	5.1566	5.1032	4.693	3.4368	4.6697	5.8307	3.9063
52011													
52012	3.7147	10.1041	1.5818	4.196	4.8583	3.2829	4.1666	11.133	4.3306	4.8297	3.7092	5.1735	4.51
52013	4.2983	3.063	2.2341	2.8397	3.9716	2.9605	2.3286	3.104	4.668	4.9206		4.5245	4.5745
52014													
52015	5.0738	7.2556	11.7011	9.9974	10.4832	21.636	14.1422	10.4452	10.2786	9.193	12.9951	14.4238	11.2973
52016													
52017													
52018					1.378								
52019	5.4865	8.6837	3.2198	5.567	4.0548	4.27	2.51	8.6834	2.7667	5.0156	2.6451	3.5735	6.5623
52020	2.3662	1.8683	2.0468	3.2133	2.5697	2.9217	5.1991	2.9074	3.561	4.1789	3.2733	3.5848	
52021	2.3485	2.7347	2.6789	3.0653	3.3712	3.588	4.149	3.5569	3.6896	3.3418	4.1976	3.2475	
52022													
52023													
52024	1.4925	0.8656		0.8635									
52025													
52026													
52027	5.7925	5.7915	3.522	6.7359	5.1327	4.2178	4.4322	5.7134	4.0272	4.1115	2.9745	4.0875	7.7755
52028								1.0263	1.1841			1.4409	
52029													2.1841
52030	1.7996	1.981		3.0318	2.6907	3.8497	7.2616	4.7929	4.4739	3.8595	6.1245	4.7867	3.4381
52031													
52032	1.3159	1.4694	1.3286	1.2556	1.8456	2.091	3.0346	2.2492	2.3496	2.4113	2.9702	2.1523	2.3826
52033	1.5405	3.251	2.2178	2.7078	2.9214	5.1817	7.3564	8.1581	3.0482	2.4216	4.0057	5.654	1.7687
52034	18.2727	23.4879	16.0434	9.7641	24.532	78.8489	29.5637	26.7043	44.6789	26.5571	41.1916	30.5603	105.3679
52035													
52036	1.7079	2.5021	2.2815	3.4754	2.5695	2.811	3.4724	3.3852	2.5334	2.0555	2.8522	3.265	
52037									1.4094				
52038			0.8279					1.1138					
52039													
52040													
52041	7.1855	9.3694	7.231	6.8948	9.9762	13.4742	17.0608	10.6217	13.9296	9.9317	13.1341	11.8239	14.7052
52042	1.6704	2.1168	1.2321	1.2942	1.3565	1.9919		2.6635		2.085	2.0417		
52043						1.2659							
52044													
52045													
52046													
52047	1.7318	3.795	0.7732	1.8643		2.9713	2.2927	3.8058	3.588	2.8275		3.2614	78.3535
52048	1.2975	1.5763	1.693	1.1471	1.5365	2.387		2.1373	1.95	1.7763	2.663	1.7936	2.3895
52049	2.519	2.8144	3.1642	3.1404	3.2828	4.4513	6.0089	4.6637	5.3767	4.1865	4.4756		2.4887
52050													
52051			1.9895	1.4036	3.1218	2.0078	7.7604	2.0897	6.6843	3.1924	6.518	3.8721	
52052	1.85	2.8296	4.1213	4.2893	4.8935	3.6077	6.4915	6.9022	4.1187	3.6171		4.8051	2.195
52053		1.5386		0.9472	1.5615								
52054	10.7375	11.088	5.664	9.2295	12.6513	5.2046	7.5226	10.0166	8.7239	7.7436	6.9623	7.1126	16.5388
52055	5.3359	7.073	5.2917	5.1769	5.636	7.43		3.7855	10.0418	7.3827	7.2901	6.8443	7.3342
52056			0.9415	1.0991			1.8873						
52057													
52058	4.008	6.9357	3.9459	6.8763	5.1044	4.0147	6.9447	9.5928	7.1932	4.9322	5.9947	3.932	12.4681
52059													
52060													
52061	2.2017	2.5068	3.0242	2.8483	3.6332	2.8198	3.5663	3.2673	3.4387	2.3865	4.0922	3.6155	
52062	8.7551	12.258	13.927	12.5056	14.83	17.3345	21.5349	19.6188	16.7948	15.0357	16.1808	16.5939	11.7532
52064													
52065													
52066	1.6756	1.5774	2.6989	2.7085	2.7173	3.6673	4.8398	4.2445	3.1518	2.7254	4.2131	5.4267	
52067	0.8146	0.856	0.7751	0.8877			1.296	1.347	1.4125				
52068			1.6664			1.085	1.3275	1.7278			2.5065		
52069													
52070													2.6405
52071													
52072		0.7916											
52073				0.9549				1.2625	0.9988				
52074													
52075	2.5834	2.6627	2.6261	2.6053	3.5085	2.9045	4.2284	4.4286	5.1455	3.8938	4.9854	3.656	3.5442
52076	2.0056	1.8822	3.8152	2.5877	1.917	5.288	2.0379	3.3228	2.8591	1.6831	2.9774	2.3331	4.0269
52077			1.0216		1.5357	1.0742	1.5505		1.785	2.0078			
52078													
52079													
52080	451.604	454.2633	416.6082	394.4557	505.1786	301.5003	290.3023	384.8363	305.5491	318.363	405.0805	447.6209	237.9466
52081	5.505	7.1036	7.6672	7.0401	8.0038	7.555	10.5514	9.3721	7.8608	7.0128	9.3322	8.6814	5.9532
52082													
52083	2.2572	2.4496	4.5389	3.1157	2.6627	6.5612	4.3163	31.4741	4.2615	3.9643	7.0268	5.0245	7.9475
52084													
52085													
52086			0.8806		1.0399	1.1624		1.7458	1.2043				
52087													
52088													
52089	1.0381	1.6853	1.7123	0.9944	2.2874	1.8675	2.1047	2.0218	2.3807		2.7051	3.7013	
52090	1.4327	2.238	1.5825	1.2907	1.3809			1.2696	1.2711				
52091													
52092								1.3394					
52093			1.0063				1.4579	1.8371	1.4299		1.8343	1.4793	1.7455
52094	2.4614	2.1955	2.504	2.4248	2.3083		2.3672	2.6051	2.1468	2.1088	2.0023	2.9173	
52095													
52096								1.419					
52097	1.5742		0.8287	1.0028	1.4555	1.1958	1.6085	1.9652	2.2656			1.9963	3.4121
52098		3.5107	0.954	1.2611		2.1045	1.5323	1.6087	1.9027		1.8828	1.818	
52099													
52101													
52102	2.8913	3.4725	4.5326	4.1765	4.2083	5.2168	6.0647	5.4173	4.6126	4.6542	4.2021	4.5718	3.9127
52103	22.9971	15.0115	11.4341	13.5396	14.0425	29.6577	26.9253	27.4094	41.9451	25.2654	27.3133	26.5603	62.2202
52104	4.4172	2.6165	4.4421	1.2059	4.7245	5.0753	2.5925	4.0921	4.3599	3.5259	4.6266	3.862	18.0608
52105	1.3433	1.1466	0.9447	1.3367	1.6506			1.1775					
52106		2.3737	0.8791	1.0087	1.1495								
52107	0.9905	1.1641	1.1459	1.4139	1.2708		1.5591	1.7974	1.1462			1.5486	
52108													
52109	3.4466	4.3623	6.6154	5.0677	6.8208	6.1136	8.5379	6.9829	5.4578	4.9646	4.8376	6.5745	5.3304
52110	1.6595		1.0947						1.2801				
52111	1.9591	1.9584		2.5852	1.6563	1.2227	1.4521	1.7401	2.181				2.3057
52112		0.6838										1.3584	
53001						1.1636							
53002	2.0076		0.9724	0.7834	1.1161						1.727	1.7276	
53003	12.6032	17.9451	9.1257	12.4239	18.4221	13.5791	11.0603	17.5402	11.685	12.541	19.3562	11.5739	14.2452
53004	1.1387		0.8565						1.383				2.5606
53005	0.903	1.3742	1.3361	1.0042	1.6451	1.504	2.1766	1.8712	2.0722		2.3077	1.8707	
53006	4.4661	5.2219	5.596	6.0012	8.5727	7.1098	8.2574	6.8152	8.3974	6.1936	7.0598	7.1587	
53007	1.0546	1.6563	3.041		2.6662								
53008	1.443	1.0891	1.7366	1.5544	3.1609	2.0286	5.8843	2.1059	5.2639	3.2675	4.969	3.1756	
53009	1.4218	2.2691	1.127	1.5812	1.8131	2.961	2.8476	4.2762	3.3471	3.2517	4.5502	3.6775	3.4283
53010		1.0452		0.9354		0.9795							
53011	7.3785	9.0046	7.0447	8.592	9.9322	14.3501	14.8574	22.276	17.6325	12.8005	14.3374	14.6371	39.8547
53012	3.722	18.8319	2.1279	10.7772	4.4401	2.159	2.9336	15.5805	3.3628	4.3583	9.0604	8.0125	3.9091
53013	1.7267	2.1609	2.5695	2.8754	3.4879	3.5011	4.182		2.4651	3.0705	2.9241	3.1467	2.0999
53014	1.7079	1.9075	1.561	2.2519	3.0326								
53015			0.6812										
53016	2.1886	0.9761	10.5951	1.5368				1.7942	1.6957			1.7121	1.6542
53017	2.8716	4.0524	3.2563	4.043	2.2887	7.8163	6.0966	10.066	20.9513	2.0554	4.5106	4.9356	12.9838
53018		0.8201				1.1069							
53019													
53020	1.0737		0.8339	0.8706	1.5307								
53021	1.3824	1.9316	1.7366	1.5212	1.6556						1.5464	1.3327	
53022	4.8982	4.5259	8.6803	9.3777	6.5364	5.6435	7.5942	6.865	4.084	3.1449	4.9663	6.7607	2.8559
53023			1.1561	1.5659		1.5463	1.8563	1.9124	2.8183		2	2.2893	1.757
53024													
53025	21.4946	35.0509	24.4141	41.3052	48.345	42.9	47.8243	68.104	70.9841	47.3573	72.8251	66.9957	71.1027
53026						1.7766	1.5076	2.0035	1.5774		2.3438		
53027													
53028	2.2751	2.2775	3.5577		3.0912	4.9264	4.3864	4.2414	3.7102	3.349	3.6099	4.244	2.287
53029													
53030	1.4853	1.3745	1.2744	1.4997	1.5131	1.9693	2.5915	1.761	2.3998	1.7547	2.4602	2.3382	5.2426
53031		2.5897	1.3759	2.2808	3.4151			13.051	4.4008	3.2331	3.294	2.8041	6.2374
53032	33.4567	23.4827	13.0842	22.3771	22.2833	44.205	17.0078	29.6659	14.4493	18.4442	18.4856	13.6092	10.4839
53033	1.3722	1.3604	1.6411	1.1941	1.4308	1.4763		1.4016	1.057				
53034													
53035													
53037	4.2642	3.1855	5.5646	4.5217	6.3226	5.715	8.3538	7.2597	13.1496	7.1413	14.4959	11.8349	17.404
53038		0.7573											
53039	2.1376	2.5959	3.0696	2.7397	3.9258	6.6242	5.6128	6.5429	5.1211	3.0047	5.798	5.4075	2.2671
53040	1.953	1.5419	2.2433	4.1649	2.5341	5.1847	4.8004	6.046	5.6313	2.2039	2.7344	5.2155	12.1641
53042	145.391	155.8666	154.4973	148.953	172.5814	85.1281	71.8607	123.1867	82.0483	93.0324	121.5416	135.6545	62.2702
53043													
53044						1.3445	1.6106						
53045	1.7669	1.1254	1.6183		1.4348	1.5977		1.1326	1.2558	2.0027	1.8807	1.5877	2.6848
53046	2.6752	2.9034	1.6729	1.6052	1.5852	4.9817	2.6565	2.7129	4.0693	3.2201	2.5014	2.1486	4.4889
53047	3.2902	3.8486	2.6581	3.3305	4.1756	9.4086	7.3251	8.0871	5.6628	7.1113	6.4876	5.0744	7.2989
53048	6.2618	7.1769	6.3975	6.1522	7.3312	2.3947	2.3783	3.9858	2.5908	2.7592	3.2865	3.9944	1.8195
53049													
53050													
53051	2.3531	2.8542	2.8283	2.9678	3.4529	3.0854	5.234	3.7464	3.9602	3.0388	3.9074	2.9656	2.8331
53052	40.9321	63.6214	31.8621	34.2621	86.396	134.6696	96.1302	132.2461	79.4601	87.7543	133.4638	68.9364	129.1911
53053	19.4186	20.1619	6.8177	14.425	31.271	22.8273	38.1607	44.8738	31.8092	19.9751	41.1552	32.9606	79.6426
53054	3.597	6.5804	2.1839	2.9643	3.4597	5.9628	5.3364	3.8446	7.0512	5.8666	5.611	6.1973	
53055													
53056	1.9314	2.3946	1.9927	2.3463	2.2527	7.4546	2.5379	2.8667	2.5484	1.9587	2.5465	2.9822	
53057	1.0775	0.8253	0.778	0.731	1.1961	1.211		1.2764					
53058							1.6612			1.3405			
53059	3.7994	3.9761	5.1806	5.5121	5.7335	7.1865	8.2246	6.6833	6.842	5.8245	6.3293	7.5127	4.2549
53060	2.027	2.1849	2.6497	2.1108	2.7659	5.6893		9.1663	4.896	3.2915	5.6205	4.68	4.1649
53061	4.9437	6.0423	4.4304	5.2079	4.5747	11.5482	7.0401	8.7848	8.1805	9.7887	10.0717	5.7952	10.9652
53062													
53064													
53065	1.5162	3.7	1.2843	1.5553	2.0511	1.8678	4.0373	2.1517	4.2885	1.8085	3.3849	2.8177	
53066	5.1908	9.3646	13.6867	10.9869	10.9528	13.756	21.1199	19.0689	27.2244	11.4348	17.3997	18.2964	14.9903
53067	4.6529	5.1051	4.7561	3.4408	4.0336	11.7272	5.3055	8.8788	6.4414	2.5466	6.6283	5.0849	14.9211
53068	3.0897	2.975	2.5445	2.4728	3.6927	2.5449	4.1208	4.3583	3.9838	4.6143	3.5922	4.5679	5.3542
53069													
53070													
53071	0.8977	1.3825	0.7598	1.3628	1.5172	1.4561	1.378	3.0566	1.8093	2.1406			
53072	1.2139		1.9733	0.9038	1.5737	1.9273		2.4653			1.6206	1.4987	3.4089
53073	0.9577	0.885	1.0536	1.0682	1.3586	1.603	2.0312	2.1459	2.2711	1.8174		1.7277	
53074			0.8873				2.1832	1.2499	1.3221	1.6687			
53075	6.8672	9.0425	5.3396	7.3482	7.24	5.8363	6.2082	10.6919	7.9911	8.0367	6.0325	6.6838	7.4374
53077													
53078	0.9257	0.9829	1.5478	1.0269	2.3979			1.2971				1.2738	
53079	2.6719	2.4215	2.8582	2.6555	2.9219	3.8917	3.9915	3.9342	4.3456	2.8957		3.9658	2.4231
53080	4.8883	8.5926	5.6283	5.2185	7.657	7.057	7.2793	16.3037	8.0263	8.6502	10.8574	7.7839	7.0713
53081	7.2414	10.837	8.489	8.6104	12.5285	24.8033	22.278	26.5841	25.5517	21.2017	23.6744	24.8613	26.1843
53082	1.6667	1.1559	3.7747	6.2793	2.063	5.3995	5.8444	4.6629	7.6512	3.0998		5.8891	7.8009
53083					1.14			1.3097	2.5061				
53084													
53085	3.8059	3.9174	4.0791	4.3733	4.9971	3.6152	5.0528	4.8801	4.0237	3.7144	6.4278	4.6791	2.2704
53086	3.283	3.5448	6.3311	5.3453	5.8962	9.8192	16.8418	10.8059	10.5216	5.7831	8.3214	8.9663	4.1633
53087	2.985	6.2493	1.9609	8.1939	4.3189	4.003	4.1774	5.4304	3.4508	3.2807	3.4491	3.1962	
53088	1.3601	4.0452	3.8065	2.9046	4.0471	2.4994	2.1171	4.5303	3.68		3.9727	3.8004	
53089	0.8408	0.7464	0.921	0.986									
53090													
53091						1.2074							
53092	2.4406	1.6646	1.2738	1.9824	1.9226							1.4862	
53093								1.1297					
53094	1.3607	1.4036	1.4761	1.5835	2.329			1.3552	1.1975				
53095	12.241	12.0852	13.1116	13.8736	20.3674	23.9431	25.7657	82.3405	39.1753	29.8755	25.3962	43.7831	33.9231
53096	1.5162	1.3054	1.7909	1.578	2.4302	2.3292	2.9138	2.8227	2.3555		2.6521	2.8407	2.3
53097													
53098	1.264	1.9146	1.5312	1.033	1.2429		2.171	3.0074	1.6747		1.854	1.4156	3.8292
53099													
53100		1.1224	1.1862	1.0897		2.222	1.1936	1.903				1.3191	
53101	9.3849	1.3764	0.7179	1.899	15.2151	1.4773	11.5965	9.6348	5.2278	4.4898		8.6569	12.6946
53102	4.9808	3.98	6.2361	4.0042	4.193	3.7134	3.1461	5.9676	3.1381	2.4673	3.4263	1.8164	14.4465
53103	1.6539		2.7718	5.8389	1.1798	7.8629	3.7828	3.3563	3.9137		1.7496	2.6284	2.6116
53104													
53106													
53107		0.9678				1.4046	1.441	1.6696					3.1102
53108			0.8695					1.4767					
53109	1.067	2.1552	1.0028	0.8301		1.9289		1.6228					5.2655
53110	50.3097	16.2383	25.9948	19.3257	21.9452	66.4001	40.1561	57.0292	73.5941	75.4521	84.1631	42.4819	63.3678
53111	0.9949	1.24	4.1441	5.4869		1.6412		4.7014	1.532			1.5648	1.943
53112		2.6612		1.282									
54001													
54002	26.3162	30.1581	29.9156	24.9535	28.8689	7.4405	6.6887	12.2361	7.9983	10.2022		13.6741	7.5994
54003	12.9172	12.6936	5.9609	10.2866	17.669	25.9945	27.1086	21.2327	17.9854	19.1903	28.5842	37.8246	19.3345
54004		0.7873	0.8807										
54005													
54006													
54007	11.3212	13.7888	22.2153	23.0214	9.5666	45.3193	16.0325	48.3053	34.0907	24.2744	46.0929	74.2459	20.1985
54008													
54010													
54011	4.5112	5.9604	4.4036	4.7226	5.7521	1.6504		1.8793	2.3597	4.5414	2.6065	2.2032	3.5293
54012	2.8352	3.6265	4.1585	4.1308	5.3133	7.3127	8.306	6.6478	6.3402	5.8157	6.9815	6.6377	4.3834
54013			0.8183										
54014													
54015	1.1343	1.3772	1.1065	1.9589	2.4803	4.8245	6.6054	6.5338	4.2752	2.6643	7.6902	7.3294	
54016	1.2148	1.736	1.309	1.8434	1.9295								
54017	5.2638	9.2144	3.7601	8.4524	9.3587	20.6466	13.9132	15.2319	15.2293	14.057	18.3698	19.1705	37.7614
54018	1.9757	2.3431	2.6279	5.0167	3.1574	3.5332	5.0624	3.4276	4.6022	5.2792	4.0909	5.8463	2.3035
54019	1.0429	0.9956											
54020										1.2328			
54021	5.7378	6.4533	6.6531	6.3279	8.5173	4.9418	5.8626	5.1898	5.3117	6.2982	5.5636	7.9392	3.5762
54022			0.7673	0.7045				1.2413					
54023	1.3225	1.6978	1.6844	2.6443	2.9981	1.9633	4.2747	2.7985	2.3668	4.0403	3.1189	3.2368	
54024													
54025	0.9684	1.3993	1.4507	1.3414	1.6309	3.1614	3.5748	3.7659	3.519	2.6392	4.6107	2.5771	2.0909
54026				1.0541	1.6203	2.2317	1.4252	2.7093	1.2419			1.212	3.7192
54027	21.8847	23.5783	21.5064	19.1676	20.9	7.285	5.2931	10.2855	6.7493	8.6461	10.2498	15.1514	6.5376
54028			1.203										
54030	1.9966	2.3779	2.2129	2.6862	2.4848	3.2336	3.4669	2.8081	3.0027	3.3855	3.4792	3.0508	3.0296
54031	2.5852	3.4923	2.7064	4.4481	3.2879			1.8826	2.614	3.2074	2.4043	2.5268	4.0417
54032													
54033				0.7411		1.0094						1.3325	
54034													
54035	1.2304	1.7322	2.0134	1.4283	2.2447	1.5645		1.9197	2.3301		2.4923	4.841	
54036													
54037													
54038	0.9664	1.2339		0.8624									
54039													
54040	1.2549	1.1954	1.1683	1.1203		1.5201		1.2206		1.5377		1.3056	1.8044
54041													
54042	1.2431	1.3217	2.5862	1.7493	1.1708								
54043	1.1576	2.2363	1.9062	1.5981	2.0161								
54044	1.5319	1.2337	1.2769	1.6383	1.5773	1.8473	2.6346	2.3482	2.7844		2.2671	1.9828	
54045													
54046	1.3635	1.2154	1.1111	2.1745	1.5227	1.6091	2.629	2.4558	2.182		3.8095	3.9624	
54047	1.7804	1.2717		0.8911	1.6341		2.0563	1.2768	1.2511	1.9829		1.892	
54048													
54049	32.1413	48.1102	50.1532	51.2242	65.0584	61.0598	140.3648	81.9394	58.728	39.006	87.7423	89.9896	27.5306
54050	9.4638	13.3985	16.6898	13.3126	25.4996	29.3644	46.8839	27.8817	25.8966	18.331	26.5399	36.1579	14.3618
54051													
54052					1.2337								
54053	7.0063	6.9427	9.0603	3.9189	7.779	2.7437	2.0073	6.8074	5.3534	3.6788	6.0903	9.8461	2.3822
54054	1.09	1.0545	1.164	1.2177	1.5499	1.7731	2.3571	1.9662	2.3079		1.7748	2.348	
54055													
54056		0.7635											
54057	1.9048	2.6284	1.1337	1.1207	1.6828								
54058	1.761		0.6807		1.86		1.5621	1.6759	1.3057			1.8853	2.5908
54059													
54060													
54061	2.8439	5.4814	5.7026	3.2643	6.0125	2.7303	3.0378	3.195	3.2922	2.8121	4.5895	4.1303	
54062													
54063	1.1666	2.1162	0.9988	1.0847	2.0405	2.3723	2.2314	2.4996	2.0637	4.3145	3.1859	2.8773	2.7102
54064	1.2223	1.9933		1.1414	1.233				1.6166				
54065													
54066			0.7584			0.9839							
54067			0.8425										
54068	1.551	1.5489	1.0776	1.0104	1.6944			1.3944					
54069		1.2216	1.1406		1.3969			1.1326					
54070	1.8395	1.4762		1.158	2.3149			1.1865	1.163		1.6767		
54072													
54073													
54074													
54075				0.9563									3.3147
54076	0.8183	0.8891	1.0089	0.9021		1.3708		1.5488					
54077	11.4356	11.7971	11.5678	7.7105	10.6193	5.0348	3.2694	4.8066		3.685	4.6875	4.4144	
54078	14.8232	18.6399	21.1726	22.4005	25.9936	27.9811	39.4596	33.9451	26.6352	19.5917	34.3061	27.9202	12.8769
54079	5.1308		2.2875								1.404		
54080			1.2311		1.5544	1.2819	1.9842	1.2987	1.7501		2.6148	1.4829	
54081	1.3971	1.4869	1.4557	1.5746	1.8439	1.3449	1.7213	1.8304	1.5015		1.9227	1.7945	
54082	2.0166	1.5193	1.3697	1.1334	2.0854							1.2043	
54083													
54084													
54085		0.9046	0.9943	1.1914	1.3868			1.8227	1.1856				
54086	0.9899	1.1553	2.0669	1.6181	2.2753	2.2794	4.6312	2.2225	4.006	2.7486	3.8507	2.8175	
54087			0.6938				1.5828	1.6707	1.2344		1.5488		1.829
54088	4.2162	3.1037	10.7282	4.8799	12.0047	3.1591	5.0237	3.8512	4.5835	4.0872	5.3216	8.2195	1.9071
54089													
54090													
54091	1.9607	2.8105	2.4133	1.0494	3.5014	3.4592	3.4784	2.1486	1.9647		2.4264	3.5981	
54092	1.5112	0.8667				1.3511		1.6883		1.8874			
54094	0.961	1.3951		1.5828	1.5284	1.2474	2.3557	2.0805	1.5996			1.5673	3.1465
54095	6.4314	7.3747	11.1558	16.6786	13.0734	7.285	17.4418	14.8346	7.8239	7.2329	10.1474	11.4907	3.5743
54096	1.4745	1.9304	2.4588	1.9048	2.794	2.4475	3.2386	3.6636	2.6509		2.6997	2.721	2.7042
54098	100.1872	86.1222	95.7633	72.986	99.0463	29.6777	26.0667	39.5962	32.3789	37.6456	34.6339	48.9336	28.7381
54099													
54100	0.7278		1.024					1.398					
54101	3.2008	2.8784	4.6544	4.3727	4.5333	3.2202	3.8399	4.3357	2.3977	2.7943	3.1726	3.5885	2.0265
54102	5.8486	6.3516	8.4565	8.3104	8.7703	9.0769	10.8724	10.2161	7.8637	7.6203	8.9355	8.1347	4.5639
54103													
54104	1.2245	1.1674	1.5846	1.4879	1.7926	1.6869	2.3777	1.8571	1.7432			2.0504	2.1551
54105								1.3794					
54106	1.88	2.2601				1.2511	1.2956						
54107	4.8882	4.9982	8.6549	6.7428	12.8362	12.6667	30.8445	14.7713	7.3354	6.2971	11.5839	16.1377	4.4948
54108	2.9604	1.8025	1.9667	0.9255									
54109	3.8622	3.2537	4.2758	5.7746	8.1112	3.737	12.0095	3.224	4.9129	5.6406	6.128	6.7437	9.2539
54110	1.1127	1.1241	1.4624	1.0208	1.4076	1.3707		1.7477	1.2992			1.7602	
54111	1.496	1.0607						2.2081	1.2281		1.5298	1.5505	
54112	1.7687	0.9718	1.5797	2.4376		0.9997		1.4477					
55001	8.78	11.1014	11.3143	11.9243	13.1369	13.1081	14.8067	14.1867	14.5945	11.9963	15.6437	15.9369	12.6303
55002													
55003	3.2267	2.6473	6.5076	8.7927			1.8689	3.2274	2.0818	3.6041	3.1611	3.7971	
55004				0.8006									
55005													
55006													
55007													
55008													
55009													
55010	4.4438	3.5338	6.665	8.6685	5.1752	1.3353	1.4408	3.2372	2.0346	2.9642	1.9779	3.0418	
55011	29.557	2.3895	5.9119	5.2809	9.0833	3.4223	11.9224	4.0565	11.4327	7.0904	10.8995	6.7161	4.3533
55012													
55013													
55014													
55015									1.0556	1.7815	1.5807		
55016													
55017													
55018	2.011	0.7984	1.744	1.3482				1.2713					
55019										1.8026			
55020													
55021	5.2037	5.666	6.9035	6.0412	6.3622	5.0074	4.5175	6.1128	7.0168	4.4744	7.8094	7.0388	15.7185
55022													
55023													
55024	1.2814	1.5148	1.3876	1.3437	2.1523	2.0152	1.8705	3.09	1.952	2.0922	2.6189	2.2327	
55025	1.3736	1.5464	1.8114	1.7917	2.0935	2.423	3.2827	2.1605	2.3541	2.6446	3.3196	2.8367	
55026													
55028		1.3071											
55029	97.2389	97.0296	99.4881	89.9771	110.2438	55.1634	40.5964	69.6349	49.5494	54.6991	70.9415	83.4374	23.5587
55030													
55031	4.5656	7.8735	6.1878	8.6467	5.9542	1.2718	2.2222	3.2098	2.4275	2.7896	3.0656	4.8479	1.7358
55032						0.7894							
55033													
55034				0.6868									
55036		1.1354	0.776	0.8777	1.4023		2.2942	1.7159	1.6089		1.9931	2.3978	
55037													
55038													
55039	1.4286	1.0311	1.3003	1.3762	1.796	2.559	2.8483	2.8503	2.3733	1.9974	1.9415	2.7768	
55040	5.586	9.9155	3.0681	5.827	9.0498	25.8682	18.1914	33.8669	14.8093	17.2869	19.4479	19.9885	30.8917
55041	1.0675	3.5192	1.8058	2.0677	2.5404	4.6852	5.3559	3.7856	3.8397	2.8316	4.0246	3.6459	2.5945
55042	2.791	2.3573	2.9823	3.3088	3.8888	3.7522	4.0441	4.149		2.7975	4.9377	4.5729	3.5237
55043	1.1081	1.9547											
55044	1.9871	1.2856	1.2746	1.1529	1.6743	3.6446	2.972	1.8571	2.3286	1.4676	2.2126	2.0133	4.9868
55045						1.0211							
55046	2.0941	2.0992	2.828	2.2904	2.3627	4.0539	3.3937	2.7551	4.2713	1.5983	3.1487	6.3007	
55047	1.8708												
55048	12.8662	18.7834	28.388	26.0641	27.3674	22.5288	35.6284	29.0555	22.896	17.048	25.2013	27.202	11.1426
55049													
55050		1.2807	1.329	1.404	1.4094	1.6591	2.5561	2.3265	2.4198	2.0422	2.3138	2.528	
55052													
55053													
55054							1.4468	1.2185	1.3011			1.5306	
55055		0.7871	0.767										
55056													
55057													
55058													
55059													
55060													
55061									1.462				
55062		1.1731											
55063													
55064			0.8447	0.8054									
55066	2.6405	3.7524	5.7263	5.0889	7.2062	11.2776	27.5803	13.6587	7.2804	5.978	11.7938	15.4309	3.5981
55067						1.3083							
55068													
55069													
55070													
55071	0.9574	1.2043	1.8195	1.9237	1.9132			1.3647					
55072	2.4838	1.9333	4.6845	2.9784	2.6359	1.4077		1.7861	1.7859	2.0439		1.7383	
55073													
55074													
55075													
55077													
55078													
55079	1.6681	1.5845	1.0757	2.5734	2.2698	1.4378		1.9385	1.6005	1.8464		1.9961	
55080	13.9571	11.8936	11.6183	10.9588	13.3376	13.2745	12.5663	13.729	9.205	6.1838	10.2566	8.8567	9.1661
55081	0.7642												
55082													
55083	1.3668	2.0911	3.2706	2.8614	1.5353			1.3823	1.2394	1.964		2.1935	
55084	1.5272	1.2599	1.7118	1.5587	1.5892	2.4832	3.0883	3.0217	2.4126	1.9036	3.482	2.5487	
55085			0.8556										
55086	1.1522	0.9612	1.0005	1.233		3.5991	1.5617	1.9035	1.209				9.9743
55087													
55088													
55089													
55090	3.8582	4.1486	5.3923	4.9967	5.4119	5.9261	9.6275	7.0291	6.2013	5.2885	5.5632	6.8081	4.3015
55091	1.4321	1.7147	1.1841	0.9492	1.7991				1.1495	1.4801			
55092													
55093													
55094	3.9181		3.1659	3.4321	7.2787			2.0577	2.5793	3.9194		3.9826	
55095		0.7545	1.3038										
55096													
55097						1.1832		1.7236					
55098		0.872	0.8233	1.2919				1.5122					
55099	5.1073	6.321	8.0572	7.7802	7.4059	7.943	10.5395	8.2221	7.8568	7.5081	9.1995	8.4496	8.1619
55100	17.2248	17.4775	28.3585	21.9205	22.2762	22.8325	29.7739	22.1128	19.3882	23.0781	19.5138	23.2243	13.6885
55101	0.8699			3.4384	2.9854	1.5504	3.7756		2.4599			1.3677	2.5068
55102	6.5731	2.7114	7.147	5.8477	6.6693	2.5718	6.3103	5.795	5.5447	3.1126	3.261	5.0489	5.2521
55103	0.8402		0.7011					2.1604	1.1287				
55104													
55105	86.1847	83.099	97.0034	77.5825	92.4481	32.9706	30.7891	50.41	27.2352	35.0628	30.8867	42.6076	18.3157
55106	21.7908	21.3351	23.5672	16.7916	22.161	6.0033		9.432	6.3249	8.5541	7.6991	12.2776	4.7027
55107													
55108	1.1378	1.3105	1.3029	1.0416	2.1178			1.4692					
55109	1.9078	4.537	1.9455	4.5055	1.5941	3.2094	2.3636	4.6667	2.7359		1.5472	1.6527	
55110	9.5329	9.2002	12.3732	14.8767	19.1677	7.4199	9.3875	5.2033	6.8467	4.3419	7.3321	7.3801	6.7494
55112	2.8501		1.2026	1.8524	2.0525	3.3457	1.9315	1.944		3.335		2.1654	3.17
56001	2.8119	4.2967	7.1897	6.164	8.1681	10.3823	11.8412	9.1332	15.6494	10.469	19.6243	17.0662	23.6876
56002	2.7693	2.8523	1.7842	2.2836	2.9864	1.5774		1.1843	1.9796	1.5211	2.5949	1.9448	2.5091
56003													
56004													
56005	3.3049	6.5029	2.2331	1.8314	2.7406	3.5107	1.9688	1.9042	4.0903	2.9433	2.4164	3.1285	4.1117
56006	19.0959	18.0986	22.2155	16.1802	31.1062	26.8201	55.238	34.3853	24.0865	37.2216	32.4051	48.3653	18.112
56007			0.7591	1.1468	1.8335	1.2289		1.0709	1.5301	1.5173	2.6626		3.6206
56008		1.5621			2.1203	3.8694			1.9465	1.3973	2.526	2.1072	
56009	2.6036	1.9949	2.1778	2.2382	2.8707	2.2292	3.1049	2.4531	3.3911	3.1797	2.9623	3.1616	2.4003
56010													
56011													
56012	2.6725	3.8044	2.8873	2.0798	4.5698	4.1918		2.5462	3.2498	5.1061	3.5308	2.4741	10.7087
56013	3.025	5.2977	3.1362	2.5004	4.8248	6.09	4.7351	4.7413	6.9187	6.8003	7.2277	3.476	41.3385
56014													
56015			1.6818	1.3334		4.2369	3.3505	2.8947	6.0463	1.4513	5.0341	5.0714	4.7737
56016	0.9843	5.5108	0.9714	1.3898	1.2113	4.5724			2.7619	1.8014	2.5357		6.1799
56017								1.0974			1.8379	1.7718	
56018	1.9995	3.5254	3.3002	3.2099	3.3412	5.038	5.3521	5.6082	4.4696	3.7163	4.7867	5.6819	4.3212
56019	15.5669	48.2965	27.9011	48.7881	50.1878	16.6942	24.5315	39.6242	34.7079	11.6845	47.6392	34.1813	9.9564
56020	5.5775	7.4972	4.8579	4.5235	5.2173	11.6156	8.6941	16.961	6.9284	7.3169	7.4681	8.1218	9.2661
56021													
56022	2.0793	2.1696	0.9223		1.4451	1.5953			1.5182				
56023	1.5932	1.3897	1.3402	1.5379	1.7115	2.7365	3.7265	5.4096	2.7316	4.1466	3.5699	3.7451	2.7601
56024													
56025													
56026	2.127	2.9304	0.9763	1.3086	1.6101	1.9927	2.864	2.5239	2.3422	2.3586	2.4401		1.8183
56027	3.8301	3.2594	2.3669	3.4111	3.5997	5.426	5.3669	5.5318	3.139	3.5832	4.7088	4.3209	
56028		1.0672	1.0782	1.1654	1.5341	1.7001	1.3188	1.5025	1.5298	1.3851		1.6846	
56029	1.8655	2.6935	1.0534	1.9154	2.1197	1.9507	1.6259	1.5247	3.0375	2.1662	1.9884	1.8098	2.7527
56030	6.5422	12.7359	7.4514	11.0438	10.0447	17.1513	21.8818	37.7529	21.8867	16.2061	12.4472	29.1466	20.0782
56031													
56032													
56033	11.1929	15.8608	8.7733	22.9978	23.0796	14.9035	18.8588	15.2604	20.7391	13.344	31.1728	22.3278	10.8073
56034	1.1297	2.2485	1.093	1.5392		8.1613	2.0634	2.5143	1.8922	2.407	2.6435	1.8741	5.4174
56035	0.964			0.9169				2.2239	1.1852			1.7463	
56036	8.1301		4.9662	2.477	5.0259	14.7006	8.246	4.1659	12.1721	7.2212	3.9481	4.5901	14.3759
56037	4.3581	3.6539	2.0781	3.7511	2.6311	9.7974	2.3408	3.0603	3.1603	3.9053	2.0636	2.9659	
56038		1.0661	0.961	1.0897	1.1277			1.3319					
56039													
56040	3.2174	3.6211	3.4903	3.2813	4.5669	2.7298	4.6929	5.2504	5.1696	4.2457	4.8499	4.6634	2.9982
56041				1.5095		1.6442	1.6675	1.7228	1.6879				
56042	1.6867												
56043	3.1941	5.2417	1.1135	3.8939	3.0435	3.019	2.7879	7.6905	2.3123	5.3888	3.3516	4.0534	2.3105
56044	8.9405	12.1404	7.8203	9.3255	11.1935	32.0366	17.4112	21.5835	28.4068	28.2167	17.3603	18.9556	36.6335
56045													
56046	1.7893		1.718	1.2702	1.1643		1.5507	2.9121	3.6582	5.777	6.7002	1.9182	3.6277
56047	3.4341	5.0422	5.3027	3.7204	4.3741	3.9057	4.5367	6.5962	5.4511	3.7278	5.5597	3.5675	3.9927
56048		5.1266	7.9332	7.7904	6.7619	1.7794	6.1388	6.9021	7.0628	5.907	8.7977		4.7712
56049	1.4495	1.3925	1.454	1.6382	2.4399	4.7156	6.4817	4.7813	7.8283	5.7542	6.7896	7.3212	3.6536
56050		1.0462											
56051													
56052													
56053				0.9665									
56054						0.996							
56055	1.3531	1.0384		0.8392	1.2795	1.3311		1.0366		1.5157	2.7017	2.2502	
56056		1.1248						1.3336					
56057	1.2555	0.8786	1.1864	1.2309		11.5775		1.6918	1.3723	1.8338	1.9229	1.7925	1.6134
56058			5.0069	3.0331		12.3714			1.9207	2.6503	1.5469	1.4376	25.1574
56059													
56060	11.2936	6.4851	9.2311	9.2767	10.4036	8.1084	9.301	8.1454	8.8429	9.2036	12.8835	13.4834	6.628
56061	6.2794	8.6116	8.8365	8.5724	16.0063	17.9748	49.2272	29.785	47.6072	49.0004	33.3757	40.7576	59.4673
56062	5.6099	6.7052	4.3678	7.5087	9.2068	20.9013	16.0714	16.7664	12.9477	15.7621	20.0859	10.2729	20.1784
56063			0.8245				1.2328						
56064	4.515	6.6848	2.1148	4.0458	4.5836	8.4336	7.2292	10.0445	8.3369	4.5278	7.3316	6.5413	9.6249
56065	2.8328	5.5932	1.4829	2.3226	3.1813	3.6898		9.562	4.1933	3.6351	4.0797	2.9224	3.8129
56066													
56067													
56068													
56069	2.1658	2.5489	2.0902	2.6835	3.1559	6.1506	3.7195	3.4883	3.3156	3.5761	4.6203	3.7386	4.0548
56070			0.6829	0.8749									
56071	2.1257	2.0645	1.8796	1.7395	2.1784	3.9737		1.1541			1.9189		
56072	48.623	69.2672	90.1186	97.8886	140.4905	126.5884	208.3341	175.919	164.4966	110.6681	110.1606	117.3943	226.1585
56073													
56074	1.0517		1.2175										
56075	12.6868	0.897	20.2746	27.8123	14.2908	54.159	95.3096	2.4789	50.5933	61.0726	27.4891	61.8364	12.8102
56076	1.2592	1.3672	1.7119	1.9946	2.1374	1.2855		1.1427	1.2112				
56077													
56078	7.276	8.6392	6.8403	11.0225	12.6956	6.2711	5.789	5.4033	8.9586	9.1206	11.3573	7.3155	12.8579
56079	6.7326	8.7096	7.2738	10.5585	6.4125	10.6211	16.5379	13.2968	11.4128	10.1286	11.5063	12.9252	14.6583
56080		0.99											
56081				1.4628									
56082	7.387	8.8083	5.7653	8.3961	12.4792	11.8141	13.0561	8.8429	10.6667	6.4369	6.7068	6.2326	6.2138
56083	1.0597			0.9601				1.4257					
56084									2.0468				
56085	5.1398	8.0702	6.1581	9.833	8.4558	8.5062	11.1679	16.8332	12.3523	7.6692	13.7186	12.5486	11.1584
56086								1.1147					
56087								1.4721					
56088	9.9064	10.3315	13.7119	11.9461	15.1757	15.6799	19.5712	15.4975	15.714	14.9444	17.6497	16.6211	11.4807
56089	5.6223	6.7164	7.6845	7.3661	9.8828	14.5654	13.2772	16.0584	13.8994	13.0167	11.3594	11.9203	11.9203
56090						1.1699			1.5916				
56091								1.0562					
56092							1.6685	1.6008	1.0849		1.748		
56093	6.819	11.7975	8.5691	8.3451	6.5563	28.3564	25.2028	35.9205	23.4959	30.0859	33.7891	17.6479	11.3499
56094													
56095													
56096	5.2501	4.3755	4.8983	6.949	5.3457	6.7175	7.3725	8.7799	7.1976	3.7042	8.3737	7.3553	10.5827
56097	22.6325	2.9204	0.7792	1.6194	8.7062	10.5451	4.2946	1.2644	10.7617	2.6756	6.5913	3.1822	8.4557
56098													
56099	1.4919	1.3798	2.7779	0.828		2.1499		1.4266					2.7388
56100	3.7775	2.3864	2.523	1.4639	1.9742	1.3365		1.5325	1.3386				1.9058
56101													
56102													
56103	2.0098	1.9607	1.8044	2.043	2.1549	5.8196	1.3298	2.5479	2.4629	3.5668	2.4391	2.0328	3.3025
56104	5.4332	7.9935	6.6258	9.2465	6.6754	8.0626	5.5654	8.2359	6.8538	5.3834	5.6754	5.0172	16.5022
56105													
56106	0.8441		1.072		1.0554	1.1346		1.715	1.382				
56107	21.697	15.1252	21.2099	29.3594	36.8312	28.4305	38.649	29.0771	38.5334	33.4523	28.9101	36.712	50.1426
56108	4.2045	4.1439	4.9753	4.6359	3.9856	5.1168	4.9272	5.1891	4.6231	4.2014	3.5601	4.6665	2.3814
56109	1.1644	1.7737	1.8141	1.2722	1.6788								
56110	1.4134	2.3207	1.1483	1.7464	1.2029	1.2655		2.6366			1.835		
56111	0.8904	1.5111	1.7565	4.626	3.6207	5.3074	3.8962	7.4995	4.5547		4.3135	7.7921	1.7731
56112	20.1781	25.6192	29.4829	29.2525	34.5454	26.2524	35.0245	27.8978	29.0866	21.5107	21.7593	25.2571	18.7322
57001													
57002	2.5	4.2756		4.2813	3.6712	2.1148	1.8387	2.1419	1.793	1.9224	2.4531	2.4871	4.6061
57003	15.5716	22.3729	14.5753	19.3715	21.7883	32.537	34.2977	41.4416	28.6571	28.1256	28.7847	26.1832	40.8187
57004													
57005											2.0346		
57006	4.9849	4.0495	4.0466	3.9439	4.0661	8.9929	3.4304	7.3057	4.2851	8.289	8.0979	3.925	8.2056
57007	2.1316	3.3276	2.5069	4.4683	3.1371	3.132	3.1794	3.9379	2.665		2.9145	3.102	1.8908
57008		1.2696	1.1047	0.9011									
57009			3.5041	2.3326		7.1929	1.6114		3.1779				10.0605
57010	3.889	8.7191	4.9138	10.3543	10.4315	19.5546	9.6007	9.6282	11.8156	7.7093	7.347	14.2648	9.2975
57011													
57012													
57013	3.4716	3.4322	4.7165	5.0107	5.2941	4.7061	3.0382	4.9066	4.6941	5.14	6.4832	5.4327	10.9858
57014	10.7063	11.9898	11.3695	11.4579	12.9336	3.9529	3.2759	5.0503	3.7984	4.9487	5.0823	6.7138	
57015													
57016	43.8506	45.0408	34.1778	62.5801	51.5865	81.7643	58.5359	69.817	79.6523	54.6976	57.4127	53.1137	91.0004
57017										2.2858		1.9309	
57018					1.3271	1.6968	2.0246	2.3342	2.0879	2.1498	2.8006	2.4539	
57019													
57020	4.2391	6.2963	3.0464	6.2548	6.4754	17.3211	9.0244	12.9337	13.0791	10.3294	13.2708	11.7213	4.0682
57021	7.8601	5.4597	6.6121	44.5401	4.0407	4.8976	18.3007	7.7854	37.844	3.0671	9.8218	13.1297	8.9523
57022													
57023	11.4894	13.8411	5.3973	9.6388	15.8447	11.8616	22.116	37.202	19.8598	10.6492	19.7626	20.2344	24.8256
57024	1.7866	2.0155	2.1665	2.4508	2.9237	2.4274	2.5647	2.597	3.3068	2.2091	3.1904	3.4878	
57025													
57026						0.9949			1.1106				
57027	21.8006	32.4835	25.1301	29.2978	25.4752	54.1897	61.8352	84.059	69.605	51.5322	52.6122	51.3741	74.795
57028		1.7157	1.0752										
57029													
57030	1.3166	1.5853	1.5302	1.552	3.1118								
57031	23.5969	35.882	9.1017	9.5537	20.7078	35.9626	29.0961	41.1619	29.6419	48.6409	39.5597	44.2056	105.2875
57032		0.8468											
57033	1.4835	1.7887	1.1486	1.6733	1.6381	1.7483	2.5209	1.9377	2.0115	1.9486	2.241	2.9417	
57034	16.0408	26.2998	13.4272	24.5834	19.3804	17.2166	11.0704	9.9121	17.6356	15.1142	17.6858	15.6874	12.6584
57035	2.7471		6.5525	2.465	4.1495		6.3913		3.5369	8.1434	3.3581	5.8493	6.3224
57036													
57037	10.5662	13.3248	11.3783	5.2279	9.6598	7.1283	11.9653	17.9799	13.7916	14.4584	14.9515	19.7746	16.2225
57038	4.3822	2.3033	4.9683	4.0095	4.8523	3.7562	4.5467	6.6937	8.4155	5.1196	8.0232	8.0379	4.7957
57039	1.1504	0.7456		0.7129	1.5512	5.405		1.741	1.5678		3.6372	2.227	3.8154
57040													
57041	1.6967	2.1301	4.5296	2.4822	2.502	5.3741	3.5872	3.498	3.6712	3.1728	4.7067	3.311	25.0319
57042		1.2005	0.7825										
57043													
57044													6.3285
57045	12.6284	8.8716	6.5507	8.3237	14.2346	15.704	13.4722	12.5453	11.4964	14.9749	11.2551	12.867	19.8278
57046													
57047													
57048	87.6897	127.4421	129.9041	125.2808	132.617	186.5827	208.9037	163.6105	168.0285	147.8688	154.189	131.1709	257.9293
57049	0.8368											1.5037	
57050													
57051	1.0069	1.2185	1.511	1.4556		1.2896	1.6273	1.5422	1.3206		1.8212		
57052						1.0041		1.1301					
57053	1.666	1.5638	2.0225	1.6346	1.8915		1.6754	1.6129	1.7602		1.6102	1.3532	
57054													
57055	3.2993	7.3014	3.6586	4.2062	4.3712	3.6025	4.9726	6.0209	3.6027	2.7796	3.4586	3.4982	5.0571
57056													
57057													
57058		0.6548											
57059	1.6542	2.5139	3.8225	2.5527	4.2311	4.5366	5.0618	4.6967	5.7707	3.7537	5.5044	4.0133	14.5651
57060	2.8765	2.2385	2.8686	4.944	4.1099	3.896	6.1132	8.4311	4.2234	3.6601	5.3982	5.5928	2.7027
57062	16.4015	31.9473	11.2954	26.7956	24.4482	18.2163	22.0841	18.7349	21.681	17.829	16.5162	18.1092	16.4903
57063	37.4684	80.9001	48.9861	40.0046	49.7047	119.9204	79.4784	99.7056	59.5639	49.5152	60.4514	53.9232	145.4497
57064													
57065	1.3951	1.6271	1.5128	3.1102	2.8068	8.2395	1.9946		2.7312		2.8846	1.414	3.2432
57066	6.0192	9.0578	7.7251	6.3652	7.4872	9.5482	13.5649	21.7154	10.62	15.3056	18.7167	13.339	9.3184
57067													
57068													
57069	4.0395	10.0462	5.9412	4.393	4.6236	3.2901	1.681	4.3701	2.0373	3.1257	3.4148	3.35	2.0526
57070	3.7916	5.2898	2.2437	4.9916	5.7522	8.0158	10.8419	12.7287	9.9669	5.9865	9.8067	7.8608	8.4505
57071													
57072													
57073	25.9133	29.7482	19.3743	21.8678	36.538	42.3307	53.5529	41.6511	85.1894	44.2698	85.6378	62.0045	54.473
57074													
57075													
57076	25.7932	36.0831	15.8477	27.265	36.0045	35.0349	25.2657	21.5655	31.3295	26.1496	41.4785	24.966	58.619
57077	9.5225	6.6012	14.2067	3.9747	1.6731	5.3625	2.62	3.0447	3.1062	3.5358	3.7484	2.9348	
57079	7.5849	16.1465	10.9811	12.0811	10.0165	9.1595	9.6646	11.2312	6.4968	5.2224	9.4057	10.6129	
57080	5.7825	6.6833	2.4575	3.6879	3.9905	16.8077	3.2216	4.1855	5.9377	4.2314	8.4677	5.5267	6.294
57081	1.4434	1.6379	2.7492	2.0593	2.0884	3.3816	3.5892	3.7603	2.34	2.1306	2.9113	4.2377	
57082								0.9946					
57083	1.7505	1.5242	1.6833	2.558	1.8726	1.7652	2.6386	2.7659	2.2466		2.2958	2.2062	2.0438
57084	1.2131	0.8073	6.3333	2.117	1.2853	13.5306	8.2663	5.5179	12.7631	1.8672	2.3932		10.2707
57085													
57086	4.7165	17.1542	2.1506	3.0205	2.6934	7.8534	2.9959	7.5732	3.7768	2.6471	3.7866	4.5207	14.3207
57087	1.7424	2.3713	2.6784	2.8247	3.0095	4.8592	3.9525	3.1583	3.6144	3.0135	3.2589	2.905	1.9244
57088	1.7024	1.6514	3.571	2.6755	3.4035	5.1978	7.3277	3.1192	5.5203	6.3377	6.3028	4.5165	4.8772
57089	20.8428	22.1585	29.2379	22.4949	23.5527	11.9481	10.8688	15.7802	10.7699	14.0496	17.1514	18.3268	5.4426
57090	8.8941	11.2167	9.9075	11.8316	14.034	23.2247	18.4941	15.6496	26.3837	26.7363	21.3821	21.919	33.1826
57091	12.7979	16.2535	12.1775	18.8894	14.0785	52.0438	41.3196	45.0101	27.4264	17.8133	25.0507	28.1158	47.7646
57092	19.3902	17.2624	17.6692	14.4991	19.5722	8.5584	9.5351	10.7084	8.2342	8.5961	10.2302	11.0867	4.4136
57093	1.9459	3.2354	3.1902	3.2555	1.7788	2.0837	1.576	7.1368	1.3553	2.4464		1.6978	
57094			1.0471				1.7403	1.2837					
57095				1.0238	1.1369	2.023	2.612	2.512	1.6464		1.838	2.2827	2.0917
57096													
57097	5.925	5.0056	6.3071	3.2733	4.9817	2.3091	4.6414		5.5049		10.6135	3.8726	5.1106
57098	46.6979	37.2532	101.2688	52.099	66.0809	126.0845	138.5736	157.0564	106.3463	112.2732	153.3773	110.362	63.9441
57099													
57100	14.7391	22.959	23.0948	18.5098	20.3396	8.912	16.3352	26.9101	15.3518	21.5868	16.0288	12.7947	12.8239
57101	12.1616	23.3817	11.6605	14.6267	16.9592	34.912	28.3555	47.495	30.2964	34.7562	27.0092	24.5876	46.8005
57102													
57103	1.5938	1.0929	1.3761	1.3399	1.2628	1.996	2.0116	1.5645	1.3665		2.0251	1.4859	
57104	6.7269	8.1502	12.0591	10.786	7.0635	7.2536	4.8491	8.8742	8.8482	7.9136	6.1898	5.4501	16.0275
57105	2.2388	2.4082	3.4267	2.5291	1.2652	2.2388		2.1656	1.7734	1.8495		1.8802	
57106													
57107	3.1957	3.7422	4.06	3.8697	3.7335	4.1637	4.4104	3.9757	3.8506	2.9047	3.2735	4.0327	2.8251
57108	3.3576	5.3134	3.2915	9.2368	2.5364	21.0232	2.3629	3.6799	1.5659	2.2889	1.9972	2.3372	13.0722
57109													
57110	11.8707	11.4209	12.6624	8.1325	11.0098		2.9045	4.0375	2.7655	3.2123	2.9336	4.074	2.5759
57111	0.8701	2.1785	0.9319	4.9472		1.1403		1.2717				1.6661	
57112	1.847	2.2928	2.2436	2.9555	3.3429	3.059	3.3497	3.626	3.1044		2.347	2.2742	3.5379
58001	3.1745	3.1854	4.3301	5.0289	4.9598	4.045	5.6047	4.29	4.3193	3.6968	4.8122	5.4745	3.6438
58002	5.437	6.2574	7.0883	7.934	7.4546	5.7957	6.2744	5.3372	5.9605	5.5681	6.1387	7.0448	4.2016
58003		1.8126		1.0578	1.263								
58004						1.2249						1.483	
58005	1.0754	1.7664	0.8922	1.4875	1.5777		1.4821	1.5162	1.3291		2.1895		
58006	8.7887	10.9097	12.0351	12.7133	18.5411	13.9038	22.5256	18.0968	14.0043	10.9674	14.7219	19.746	9.5174
58007	4.3475	13.9179	1.5791	3.8588	3.4199	4.0474	5.9944	4.5505	8.5343	6.9242	2.619	4.5184	5.2296
58008	5.7181	5.9856	6.0729	5.6071	7.8384		6.1132	5.7232	6.0056	4.2704	5.6806	6.1006	2.9534
58009													
58010													
58011													
58012		1.2027		0.8616					1.0136				
58013													
58014		0.9942	1.0999	1.2739			1.7849	1.4882	1.7107		1.7094		
58015						1.0383			1.5961		1.9817		
58016													
58017	9.66	18.1893	9.9073	13.3383	22.8695	36.9787	35.1205	28.5564	26.8239	26.3735	25.2552	30.3188	19.2091
58018	1.3579	4.9072	3.8046	2.377	2.0719	1.5931	2.1815	3.6229	2.5999	1.7085	1.849	3.2592	3.768
58019	2.2946	2.7779	4.3822	3.6204	4.3891	4.1492	4.2606	5.4179	2.3921		4.719	3.5953	
58020	3.1439		16.2572		3.0507					7.0632	1.4304	18.8119	
58021	2.2936	2.0754	2.8383	4.389	1.4639	5.2212	6.305	10.2323	8.0544	2.119	4.3156	4.3438	4.8783
58022													
58023			0.9011			1.1817			1.5067				
58024	4.7831	9.1633	0.7951	1.6684	1.2169	11.0836		2.319	1.2323				2.294
58025			1.6563	0.976		2.9711	1.6785			2.1325	1.9382	2.8442	
58026				1.0466									
58027													
58028	5.2914	3.9657	7.8631	4.6228	6.1004	26.9494	23.6413	11.5117	24.0641	12.654	22.0052	21.6715	9.6872
58029													
58030			0.6482										
58031	9.9802	10.6416	6.1117	6.1169	6.3919	3.0753	3.6462	4.7734	4.9756	8.0576	3.43	3.669	7.7568
58032	2.8957	3.7798	2.7187	2.9521	3.2515	2.7182		2.4867	2.28	2.0197	2.0608	2.0807	1.8812
58033													
58034	0.9034	1.112	1.289	1.3022	1.1641	1.0488	2.0041		1.6104	1.3554		2.0755	
58035								1.441					
58036													
58037													
58038		1.3624	1.2515	1.0345			1.3787						
58039													
58040													
58041	4.0332	4.5214	4.3128	4.6037	4.7451	2.9776	2.3844	3.9143	2.884	2.3684	3.8641	3.3481	
58042	15.7589	20.7142	21.7975	17.1694	30.4147	33.694	32.664	33.6828	44.4434	32.7832	57.0179	50.6594	44.6034
58043	0.9097	1.2887	1.1155	1.2072	1.6444	1.7719		1.5829			2.472		
58044													
58045	7.5154	6.1684	3.5574	8.1937	12.2309	13.0393	12.8318	4.3815	18.1206	11.1332	13.6351	12.1783	12.0366
58046	1.5548	2.1554	1.197	1.8528	1.8928	1.9299	2.6089	1.7766	3.8609	2.1486	2.342	2.0901	2.3343
58047													
58048	0.7667					1.2815	1.9848	1.4846	1.3738	1.5616			
58049	3.8245	3.4531	5.3038	4.4219	3.2209		2.2039	2.5372	2.2036	1.8179	1.919	2.3359	3.4427
58050													
58051													
58052	10.4312	7.1297	4.4794	5.4852	7.9072	15.3508	15.1968	16.1931	10.8936	21.2494	23.7574	22.286	5.3626
58053	2.3185	2.4813	1.5904	3.1687	2.8013	5.4989	5.3725	2.803	6.2033	3.6763	3.5197	2.6381	10.8368
58054			0.8988	0.9715	1.4839	1.3055	1.3616		1.1637	1.9262	1.8787	1.8148	
58055				0.7417			1.175						2.6166
58056	38.1428	64.7237	39.6147	61.6326	93.1811	116.5555	177.7288	153.4754	130.879	100.1243	117.5244	121.9665	144.3595
58057		1.0676		1.1157		3.6149							19.2593
58058	0.907	1.8849	1.5432	1.225	1.4945	0.9406		1.3225	1.3286	1.4546			
58059	0.9703	1.5371			1.5814	0.9697		2.0122		1.567			
58060	1.3069		1.0992	1.5837	1.3802	1.6031	1.7443	1.5966	1.6185	1.5101	1.5998	1.5773	
58061	3.9435	0.8594	2.2933	3.594	3.9406						1.8056	2.1394	
58062													
58063	2.4459	3.9435	1.3911	3.1844	3.3041	2.1773	2.846	3.1315	2.7936	2.6173	2.3636	2.2929	3.3002
58064	0.9336	1.0463	1.3982	1.6299	1.6046	3.0866	2.5897	3.9061	1.839		1.8646	2.9836	
58065	1.5118	3.8314	1.9808	2.2716		1.5411	1.8628	2.155	3.2696	1.8018	3.2797	4.4251	
58066	1.2128		9.4571	3.7848	3.3539	1.0333	1.72			3.4427	3.5466	2.4329	
58067						1.3598							
58068													
58069	4.5843	7.0006	4.6473	4.4693	7.5265			3.357		2.3991	1.9005	2.8516	
58070	1.0724	1.6736	1.7699	1.7426	2.055	2.1983	2.6093	2.1083	1.9378	2.2624		1.7746	
58071	5.7693	6.3001	8.1029	7.6963	9.0447	10.7383	10.2432	10.3871	8.785	8.4126	9.8721	9.7994	12.2868
58072									1.34		1.5794	1.6931	
58073								0.9308	1.193				
58074	29.467	51.8445	17.4035	26.1361	30.5506	39.6575	33.2686	87.9764	31.6785	29.1902	35.4838	30.4875	29.5369
58075	1.0669		1.5742	0.9233	1.4978	2.0381	2.5695	2.0122	2.4056		1.8262	1.8725	
58076	0.9857		0.7807	0.7278									
58077	5.1208	4.9388	3.3859	6.1516	6.9821	5.1023	6.6967	5.5425	10.5278	6.1663	6.7153	8.0376	8.7068
58078													
58079	20.4798	13.5812	21.3823	18.6009	27.961	22.9161	36.1525	25.023	34.5515	18.4604	23.1193	24.9104	26.334
58080	1.164	0.9039	1.4696	1.169		3.1247	2.3322	1.7877	3.5104		1.6946	2.1791	3.1686
58081	2.2788	2.4719	2.19	2.8038	2.682	7.6488	3.4143	3.9285	3.8014	3.7901	3.9113	4.8371	2.9673
58082	6.0595	6.7074	9.1549	9.0951	9.1277	10.2496	12.5212	10.0708	9.2853	9.0071	10.8614	9.457	3.7911
58083													
58084	2.7765	2.5479	3.6308	3.2769	3.3559	3.5732	4.1816	4.0251	2.9216	2.7255	4.1215	3.6535	1.9596
58085			0.8067	0.922				0.924	1.2933				
58086													
58087													
58088	0.846	2.2895	0.6938		2.7779	5.3376		13.0384		5.0888			
58089			0.7014										
58090													
58091	8.0555	12.7849	8.5307	11.3949	10.6997	11.7913	7.499	18.8153	5.8279	7.5868	6.6116	9.3239	15.2212
58092	3.5701	3.8047	4.4918	4.3606	5.7474	4.5998	9.1383	8.13	4.8867	4.8076	6.9292	8.8558	2.5766
58093	2.0565	1.8367	1.9326	2.439	2.3066	1.5751		1.793			1.5907	1.6859	
58094	2.6003	2.211	1.4193	2.3103	5.2954	14.3038		2.077	3.7378	2.0549	4.6346	4.3007	13.4434
58095	4.4928	8.016	1.4059	5.0826	4.4901	3.1638	4.5362	7.8496	4.432	3.9195	4.8537	5.5815	2.1038
58096	2.9886	2.4287	3.4356	4.1329	4.8441	5.122	8.545	4.9195	5.838	5.2143	5.4058	6.0868	3.4321
58097	1.4631	1.901	1.1592	2.1662	2.1516	1.8229		1.6208	1.7967		2.1314	1.8894	
58098	1.088	0.9591		1.3086	1.0984	1.3814	1.6586	1.4663	1.1746		2.0759		
58099	2.1516	2.1263	3.0711	2.932	3.5711	2.3922	2.8844	3.9232	3.2104		3.4577	3.6158	3.2751
58100													
58101	3.0544	2.4242	5.2859	2.0013	2.7249	1.7439	1.3953	1.5873					
58102						0.9906						1.4639	
58103	2.2207	2.4305	2.3812	1.6015	1.8608	1.5438	2.0026	2.8122	2.3744			1.433	
58104	6.0075	4.3128	2.9078	5.1498	3.0271		1.2256	1.9853			1.7701	2.7689	2.1852
58105	6.1134	5.5991	2.2094	2.5784	3.8472	3.8043	1.5001	2.7486	2.5054	2.2755	3.1983	2.7511	3.5715
58106													
58107	2.5274	2.6568	1.4766	2.9154	4.2373	2.3869	3.7634	4.5214	2.9732	2.2963	4.3077	3.6186	2.6813
58108	2.528	4.391	4.2459	3.386	4.3712	3.5056	5.0817	7.6859	4.6704	6.1717	5.4177	4.9761	5.3696
58109	5.4639	10.2882	2.4018	3.5025	1.373	2.1197	8.3291	1.9047	4.1015		3.5276	1.646	
58110	0.8904	0.7873	0.8739	1.01	1.0058			1.1564					
58111	2.2219	2.2651	2.9372	1.5381	2.8393			1.3861					
58112	1.0894	2.2902	2.0332	2.1815	2.6557		2.2972	3.3766	2.5708		2.0685	2.4485	6.6933
59001	22.2542	24.5124	20.1149	22.5611	18.99	20.041	16.3649	13.5739	28.003	17.048	13.9694	16.8693	40.6975
59002	1.0071	1.8701	1.4263	2.2248	1.2904								
59003	24.7047	58.0115	9.0096	19.6074	19.0862	27.2343	33.847	75.3042	41.1245	61.4356	55.4288	28.7529	56.0776
59004			1.2777	1.2688	1.5336	4.2064	2.2582	1.7469	2.591	2.7038	3.397	2.6526	
59005	1.7832	1.2389	1.4535	2.1421	2.5166	1.0459					1.5382	2.0265	
59006													
59007	2.0374	1.1595	3.8715	3.2564	2.827	2.806		1.8505	1.3509	1.4662	2.4526	1.9358	6.9802
59008	5.2811		3.3262	6.4163	3.2998	1.7774	14.9277	3.4059	13.5017	122.8247	128.1538	62.2171	
59009	5.269	7.3845	5.084	7.3845	8.1682	5.0611	7.559	4.7384	6.1438	5.2267	5.9793	6.419	4.4917
59010	1.382	1.0868	1.6818	1.6197	1.1185			2.2933			1.9436		
59011													
59012													
59013	2.5677	1.2869	3.1291	5.9847	3.6129	2.6412	2.3446	2.1192	3.535	2.0875	13.9633	5.8868	2.3344
59014			0.6299			1.0639			1.5124		1.692		
59015		1.6246						1.0927					
59016	5.7882	8.7505	6.1139	10.7342	7.8134	8.9396	7.3678	6.7727	9.4876	10.3558	7.6112	6.8127	14.9792
59017	1.7599	3.4495	1.3709	2.2961	2.5997	1.9821	1.8108	2.496	2.1756	1.6807	2.2954	2.7913	
59018	2.0193	2.8476	2.454	2.5792	2.7918	3.4095	2.9738	2.6689		2.5798	3.2019	2.7494	2.9386
59019													
59020	2.4421	3.5851	1.7626	3.0367	2.7946	1.9495	2.0037	4.0453	2.8631	2.618	2.0498	2.7698	4.2614
59021	1.7199	2.4225	3.2707	2.9639	1.6271	2.867	2.5175	2.1522	2.8023	2.7561	2.1589	2.6973	
59022	2.9054	5.0178	1.9749	4.7521	2.8261	1.9054	2.3832	2.1619		2.6191	3.1181	2.2568	7.7693
59023	3.3508	5.7238	7.2827	4.633	3.9347	1.9046	1.7979	3.0616	3.4169	2.1547	4.2834	3.1019	
59024	2.8459	7.2874	4.6817	2.9513	2.2375	1.9258	2.4979	2.2491	1.9821	2.6436	1.734	2.4362	
59025	1.2887	4.3723	1.4066	0.8344	1.4321	4.8681	2.5127	3.7215	1.6354	3.7731	2.7689	2.8834	
59026			1.1977		1.4553	1.2326	5.0314		3.4843	2.5418	3.4965	2.1964	
59027	4.9153	7.5045	7.0572	6.014	8.9071	17.1093	26.2186	13.9227	16.321	14.3731	19.3928	14.9616	15.0182
59028	14.3806	10.7517	13.6723	11.7285	14.8672	28.5069	35.0533	36.3737	27.8906	37.8406	38.0507	34.3639	59.7437
59029						1.061		1.0386					
59030	16.6846	9.2968	8.4828	10.2761	20.2485	30.9985	27.2942	36.0834	31.7705	15.5878	39.177	43.741	40.524
59031	22.8592	36.3708	27.2738	25.8275	44.3631	37.9477	67.0771	59.7234	65.3482	55.0149	73.71	74.9811	88.7613
59032	1.2075	2.0939	1.592	2.1881	2.1889		1.4128	1.4039					
59033													
59034													2.2277
59035	2.1702	1.8125	2.8064	2.8914		2.5081		4.1298	3.3773	3.4068	2.7839	4.0916	4.4556
59036	17.3261	12.4145	29.9126	26.9212	42.2066	30.2087	48.2534	28.6339	34.0619	25.5536	39.6363	30.2971	49.7631
59037		0.8004		1.0715				1.4921					
59038			1.5801	1.6268		2.196	1.3043	3.4368	1.7603				4.0444
59039													
59040	6.7268	6.3512	8.0179	11.5702	9.5766	9.6485	14.211	9.3466	11.698	8.7928	14.2224	12.5615	11.8194
59041	5.4975	9.6342	4.7955	6.7243	6.6329	9.9428	8.5838	16.7679	9.8668	12.0573	8.4199	8.327	13.9468
59042	1.0937	2.3251	0.87	1.2027	1.7931	4.0681	3.4365	2.3892	3.5043	3.3998	3.5625	2.3637	2.7995
59043	1.5906	3.6232	2.1754	8.9267	6.5715	1.8873		3.0553	1.3813	6.3332	2.6071	3.6757	10.1798
59044	12.8258	15.7445	10.1134	12.2723	12.1833	32.9779	21.0065	31.1917	17.6197	17.8203	23.6753	13.6091	53.3243
59045				1.4003					1.3147				
59046	7.206	11.7309	5.7578	8.5006	10.4979	9.4725	8.7096	22.6679	10.4971	11.6442	15.5534	11.4832	13.6893
59047													
59048		1.3188	0.8324	0.7861									
59049	8.31	8.7612	6.8283	11.7843	8.3331	14.1941	11.6827	15.3832	11.9957	6.9242	8.8194	8.2802	13.8277
59050	18.8149	18.5965	11.8001	15.9779	18.5788	39.5084	24.6479	49.844	22.2181	18.7455	21.5042	16.5452	87.5409
59051	1.2973	1.6267	0.7434		1.4756	2.2029	1.7864	2.0284	1.8734			1.386	1.7342
59052	2.186	2.5327	2.5195	2.4064		2.0744	3.0174	2.7147	2.1454	2.1808	2.559	2.3307	
59053	2.4636	2.0491	2.5307	1.4572	2.1014	14.1785	2.2222	5.3216	3.0809		2.9396	3.1515	1.7732
59054		0.8461	0.8801	1.0166		1.1309		1.0884					
59055		0.8303	1.0178										
59056	1.1045	0.8927	1.5628	1.6129	1.8981	2.2255	2.5228	2.4898	2.0887	1.5575		3.3008	
59057	3.745	4.629	3.4348	3.1619	2.547	8.4004	4.1574	8.7419	3.6256	6.1937	6.2442	3.9876	8.8937
59058	3.7018	8.7964	5.4269	6.2584	3.45	4.5912	3.1103	11.0819	5.3683	8.2266	6.456	4.8488	2.3588
59059	6.309	13.0016	5.4192	8.3911	9.5709	17.7821	12.0762	16.8462	19.105	21.6419	17.2814	14.0419	25.6368
59060													
59061													
59062	6.4786	11.7718	10.682	11.1346	8.7456	9.5047	12.8783	19.1421	14.5946	17.2241	18.8226	15.4289	13.8289
59063	6.9214	5.205	6.595	4.6883	6.8129	6.6656	11.897	9.3724	14.3556	10.8303	9.8362	6.8207	28.4027
59064	5.6568	4.1316	12.7753	6.1184	6.0558	4.6022	7.9289	3.2591	6.8702	14.3402	7.0476	7.1708	11.1009
59065		0.9444											
59066	3.1731	3.506	4.7549	4.0174	4.6461	4.9167	6.7777	4.9546	5.711	4.3873	5.0659	4.7505	3.3174
59067													
59068													
59069				1.1177			1.485					1.4859	
59070	2.5652	1.7908	2.3036	2.8193	4.5141	6.7138	6.7872	7.4457	5.8148	5.1545	8.2054	7.5258	5.0951
59071											1.6286		
59072	2.8875	2.8158	1.3382	1.9393	1.9807	1.9619	3.6617		2.6387	2.8532	2.44	2.4162	
59073							1.5276						
59074						1.0216							
59075	3.7372		1.6011	3.8057	4.3879		2.5314	10.0821	3.1075		3.4249	4.4014	3.8882
59076		1.3425	1.0123										
59077	3.4365	3.6153	2.1258	2.1102	2.9782	12.1443		2.9843	2.7137	3.4295	2.6068	3.2216	2.0715
59078	16.1107	22.1925	23.0182	22.5795	20.7626	46.6175	29.7028	26.5956	35.774	19.9968	30.4543	34.3091	78.9985
59079	4.6827	3.8487	5.2509	5.7469	6.2109	6.8104	7.3664	11.0372	8.7595	8.319	5.7803	5.198	17.1013
59080	4.2292		4.9507	4.9293	5.0985	4.8159	4.8072	6.6097	5.3654	3.8065	5.4075	5.2378	4.3451
59081													
59082	4.9283	3.9369	4.578	3.7386	5.4034	4.236	3.6436	3.6588	4.8597	4.7515	5.3314	5.5186	3.2123
59083	1.2779	1.0485	1.9512	2.1796	1.8515	1.9506	2.4869	1.8985	1.6394	1.8018	1.945	1.911	
59084	5.8593	9.8219	4.3222	6.9258	9.1423	21.2223	24.0304	18.8972	17.5778	14.4215	11.0255	15.9883	14.2356
59085	2.4872	2.5884	7.76	9.5313	3.5701	4.9927	3.2626	3.2392	2.4721		2.9753	2.2147	8.6141
59086													
59087	3.901	4.0795	5.9192	7.3781	6.1615	4.9355	3.5784	5.7879	5.0293		4.7045	3.9562	6.359
59088	56.4755	63.7616	63.869	43.5226	63.3566	12.4884	17.6123	19.024	16.1436	19.8997	20.9874	25.506	8.2314
59089	0.921	1.8642		1.4665	1.4271								
59090	1.5842	1.7125	2.0689	2.2129	2.0667	1.7201	2.4255	1.8054	2.606	1.7114	2.1518		2.8345
59091	1.3862	2.0118	2.4123	1.6192	2.8458	3.9104	5.0538	3.5042	3.6883	2.663	4.7778	5.6657	1.824
59092	2.127	2.2886	5.2688	3.0847	6.7724	7.3587	20.8031	5.0409	12.4352	14.2856	11.4933	7.5018	5.3471
59093	1.3563	2.3352	2.4801	2.2723	2.031	2.3143	3.3423	2.2745	2.6249	3.1387	1.8846	1.7082	3.4228
59094	10.0953	13.5036	5.7832	7.2825	13.7938	13.4441	7.6685	7.9531	9.501	9.9581	14.9893	11.2383	13.385
59095													
59096	2.7077	1.8692	0.8517	4.1631	1.3064	1.1128	8.1519	16.3507	7.6061	14.2515	3.4206	3.4443	2.1102
59097	13.721	7.7209	22.1891	17.6729	21.9236	25.9444	43.5333	43.6054	27.2293	26.1768	25.2317	21.2624	10.1979
59098			1.0196			1.3417							3.8225
59099	3.1005		2.7695	3.2616	4.5187	3.1708	4.2176	3.7616	4.0024	3.5412	3.4929		
59100	2.6733	2.529	2.6669	2.4573	2.8566	2.8517	3.3435	2.8185	3.3296	2.8041	2.7305	3.4316	2.6366
59101	6.0673	6.8395	7.2784	6.8155	7.125	6.4933	8.4073	6.4675	5.2001	4.9689	5.4713	7.1497	4.4171
59103													
59104	1.8512		7.6283	1.9992	2.7484	2.356		1.3231	2.2708		2.751	1.6604	1.8782
59105	0.8962		0.763			1.4768	1.5535	1.6458	1.738		1.6927	1.4624	2.722
59106	2.6831	3.5067	2.0303	2.0886	2.02	2.7886	2.9132	2.5897	2.9374	2.4341	2.641	2.9601	4.7056
59107													
59108	24.3255	18.1102	17.8601	20.8326	32.49	25.0259	26.8821	52.5129	18.2155	30.8615	18.9969	15.9433	36.9448
59109													
59110	1.2701	1.229	1.0274	1.9275	1.6704		3.2261	2.0842	2.7727	3.6675	2.7539	2.6892	2.4588
59111	1.8216		6.7089	3.4909	2.5298	6.3771	3.2139	5.1407	4.8754	2.3661	4.5138	3.2281	2.0963
59112	2.7376	4.2828		5.6625		2.8186	2.1208				3.2516		4.4783
60001													
60002	1.3164	1.7406	1.5073	1.5457	2.2578		1.7018	1.8418	1.7502			1.9933	
60003	2.0455	2.9984	2.0793	2.4764	2.281	2.2949	1.6242	2.5962	2.055	2.4098	2.3881	2.1209	
60004	3.1099	3.371	2.9019	4.8498		9.8369	2.9423	1.3236	4.3557	2.2051	3.8056	2.7986	12.1303
60005	12.0653	13.2265	11.6508	16.6095	14.5291	32.6125	23.4143	33.5115	22.7833	20.9064	29.8485	29.6392	40.2555
60006	7.718	9.9054	6.3864	8.6775	8.4388	14.4233	5.3739	12.1586	9.1279	9.6561	9.7449	8.3095	13.8861
60007	3.5563			1.7309	3.3682				1.4339	2.2632	2.7232	3.6884	
60008		1.2724											5.244
60009													
60010			0.7867	0.8811		1.3895	1.4413		1.6111				1.7584
60011	6.5636	11.7025	7.0613	5.7141	6.7764	4.4972	3.3302	5.7512	5.9214	4.0996	8.0423	8.6886	
60012	1.0719	3.9721		1.7149									
60013		1.5436	1.9749	1.5785	2.0888	2.5682	2.8845	3.367	2.7553	2.0704	3.3276	3.0048	3.0145
60014													
60015	1.469	1.4182	1.6242	1.1776	1.7897							1.6066	
60016	10.4723	14.6069	13.1413	15.2795	14.507	15.1493	17.2067	17.5824	15.7191	13.2987	15.7476	17.0972	10.7823
60017	2.7595	5.0075	1.5611	2.6781	2.7337	3.2634	2.5161	3.6017	3.0989	3.2395	4.3497	3.5647	2.1714
60018						1.2842							
60019	5.9766	12.6505	8.0927	8.6804	8.4868	3.4781	3.9912	4.5022	9.5476	6.966	8.1425	6.9011	8.8094
60020	1.3566	3.4241	1.1396	2.2206	2.7966	5.0507	5.6306	9.6048	3.6928	3.6074	3.7128	4.0947	3.1514
60021													
60022													
60023	2.2713	2.7767	4.5078	5.6988	4.5636	5.1465	6.2473	6.0253	4.559	3.8081	5.4356	6.3987	2.7044
60024	2.6137	3.9348	3.5183	3.7398	2.8341	4.2489	3.1086	3.7804	4.2244	2.3604	4.6094	4.2093	8.117
60025								1.4243	1.6542			1.6522	
60026	1.8647	2.327	1.3509	2.1471	2.0243	2.658	3.2267	4.856	3.424	1.8661	2.183	4.8653	2.6569
60027	1.3216	1.7774	1.7313	1.5885	2.0892	1.9568	2.4511	2.2802	2.2149	1.7542	2.5765	1.9961	2.1636
60028													
60029	2.7385	2.986	4.272	4.2721	4.9973	4.5307	8.9489	4.816	6.8264	6.6142	7.6096	7.5645	4.4799
60030		1.0421	0.916	0.6563		1.2056		1.4766					
60031	1.9481	5.4968	2.8009	2.997	2.1749	2.912	5.4584	2.6243	5.1873	3.7808	2.8841	4.1883	2.8933
60032	4.2821	9.5532	4.0899	6.1726	5.2622	4.5969	4.7489	7.1655	5.4303	4.6895	4.8779	4.689	8.8759
60033	2.4343	1.1951	1.4678	2.0098	1.272	8.8524		1.2863	1.9791			1.9302	7.571
60034		0.8514	0.8534	0.9724	1.4058	1.4422		1.3877					
60035		1.565	1.6354	1.5212	1.4305	1.9292	2.0588	1.9502	2.2125		1.8713	1.9613	1.7419
60036													
60037													
60038	5.5341	8.9045	4.8062	7.0279	6.1947	11.5206	10.3849	14.6036	5.4135	9.8096	9.93	8.5872	16.1201
60039	1.7246	2.0245	1.8115	2.093	2.1917	1.1883	2.5026	2.0875	2.2044	1.9389	2.787	1.9679	
60040	1.3327	1.7216	1.6836	1.9138	2.6	3.4481	3.8982	2.9925	3.7411	2.1672	2.9965	3.1354	
60041	1.7236	1.9382		0.8445	1.0556								
60042	2.2602	3.6712	2.4951	3.8403	4.2936	1.1447	1.6918	1.4357	1.9046	1.6127	2.4316	2.5499	
60043													
60044													
60045	3.9174	4.5361	4.3213	6.4136	4.3036	6.9897	7.6887	8.7296	7.3448	6.0126	6.2251	5.9824	9.093
60046	4.124	6.9592	2.379	5.0092	4.8675	12.286	8.0603	14.4468	9.6184	6.5409	9.3182	7.8804	8.2905
60047	2.1293	2.4139	1.9133	1.5301	1.1847				1.522				3.0091
60048	6.1754	7.3644	6.8384	7.2219	9.3468	11.0856	12.9032	18.5881	12.4271	14.9911	15.9149	10.1225	12.9675
60049	18.2669	16.6194	19.1553	21.1785	22.4327	27.7098	45.0321	29.3567	29.8124	20.8904	28.8382	28.3942	18.6504
60050													
60051		0.7976	1.7021										
60052	4.9349	5.0886	4.6499	7.6698	6.1317	8.7674	4.9906	7.2188	5.7087	4.9233	4.0369	5.8038	10.7694
60053	1.4735	1.1783	4.0551	2.2085	6.1908	3.7953	11.9113	3.6462	8.3317	5.4269	9.2055	5.9878	3.5079
60054			0.8428	0.76			1.3101	1.4655	1.4861		1.9261	1.3691	
60055													
60056		1.6807	1.1358	1.6758	1.4271	3.3843	3.8049	4.493	2.0084	3.3187	2.6135	2.0464	2.0277
60057	1.5523	1.2831	1.5738	1.4599	2.1647	2.5011	2.4269	2.0472	1.7007	2.2287	2.8207	2.7777	
60058	1.2313	2.8478				1.7031		2.1252					2.571
60059	18.0766	18.9418	10.3097	13.2116	27.1255	13.1351	34.998	56.1611	34.4068	37.4821	52.7845	40.1077	25.545
60060	14.7437	25.6539	11.605	14.4773	17.1898	15.2541	20.0988	20.2729	23.1513	23.7227	19.0418	18.7077	31.4767
60061	4.3755	6.0678	7.8367	5.4824	7.8039	7.0884	8.4315	5.5566	8.9585	2.6074	10.5736	5.1969	5.707
60062	3.8134	5.1339	2.0766	2.7994	4.6124	9.8134	5.1346	6.0019	4.2128	4.8121	7.8754	4.6322	
60063													
60064	1.0004	0.9753	1.3314	1.4854	1.3822	1.9212	1.8579	2.0872	1.7357	1.4066	1.8418	1.8909	
60065													
60066	3.8212	8.0459	3.163	5.1022	5.3168	7.7787	3.5498	5.7921	5.4102	6.3178	3.6644	3.7649	26.104
60067	3.1186	2.9338	4.0852	6.488	8.3626	6.024	7.2905	5.7049	7.2853	5.0653	5.8073	7.4935	7.0984
60068	12.3936	34.6572	19.1944	31.4408	23.399	12.9165	17.881	18.7743	18.4216	12.8761	13.1873	14.5756	7.5194
60069	1.1121	1.308	2.2952	3.3721	1.807	2.838	2.1781		2.0622	2.4063		2.5394	3.2189
60070	2.3161	3.1936	1.0149		1.3203								
60071													
60072													
60073	2.4354	2.4237	2.4011	2.6617	3.1998	2.8914	3.2644	2.3577	3.4252	2.2955	4.529	3.2212	
60074	1.4072	1.9711	1.5586	1.5637	1.5865	1.056			1.8487		2.8181	2.0378	2.0793
60075	4.0048	5.2233	7.7665	6.9115	10.0684	14.2995	33.668	17.9233	8.4857	6.4799	12.7865	19.5301	5.5246
60076	2.6342	4.3968	4.5133	2.9935	3.5998		5.5835	7.8038	3.8868	5.053	5.4997	3.8194	1.8711
60077	4.4138	9.4353	3.4834	3.4639	3.0726	7.3419	9.2084	8.158	7.8257	13.911	10.5479	7.2092	5.3706
60078													
60079													
60080	3.2624	3.473	3.4898	6.1678	2.7616		3.2844	3.638	5.1079	3.4392	3.4792	3.2676	6.7933
60081	6.6269	2.4866	2.7921	3.9464	6.5862	4.4113	10.6557	6.7211	5.9627	9.615	6.9341	6.4022	6.1758
60082						1.1771	1.5607	1.5146	5.7846				
60083	7.4653	3.6637	8.7778	5.8626	5.1365	13.7379	11.7466	10.1781	10.0225	11.2122	11.7393	8.9175	18.9248
60084	1.1771	1.6686	1.5373	1.9808	1.7638				1.4674		1.6607		
60085													
60086													
60087	2.3173	5.4551	1.0019	3.1784	7.0261	3.4332	3.5663	3.4948	6.534	6.5806	4.2022	6.4399	8.6472
60088	1.5745	1.7322	1.9548	2.9089	2.2189	2.1823	2.7675	3.0922	2.0183	1.7248	2.3656	2.9011	
60089													
60090	2.1598	1.4591	2.1465	5.2651	5.0432	3.6312	4.8111	3.0084	15.6734	1.9574	3.8294	12.4258	
60091		0.7413											
60092													
60093	16.4761	31.0936	32.8181	36.7107	37.5296	99.7158	94.5192	73.1392	64.4572	38.7698	73.3106	48.5526	130.0613
60094				2.5506		1.3985		1.4454					
60095	4.7498	5.4267	4.1278	4.5073	5.5751	3.3988	2.0682	3.6452	2.5948	2.2418	1.8679	1.8254	3.4988
60096	7.8373	9.9607	10.027	12.2249	11.452	7.0401	7.433	11.2432	5.893	7.8873	5.5469	5.0117	5.7562
60097	1.0389	1.1717				2.1785	1.3901	1.6895	1.0877	1.9678		1.6429	
60098	1.0514	1.1854	1.5677	1.4997		2.0821	1.3576						
60100													
60101	1.6776		1.8921	2.5929	2.3112	1.5188		2.2429				1.7625	3.3356
60102	2.0133	2.7865	5.777	2.9049	3.3863	8.9841	4.8735	5.1357	3.8254	3.8197	3.4335	3.0547	
60103	8.8036	10.8884	10.185	9.0865	11.302	16.3983	16.0504	16.8693	11.6707	13.7024	8.4001	10.7226	17.8904
60104	1.506	1.3572	2.26	1.4661	2.035			2.1907			1.5585		
60105	3.0298	3.9916	2.5757	2.9157	5.7733	7.3991	5.9408	5.8204	5.7048	5.9282	9.0385	4.3181	1.5957
60106													
60107													
60108	1.9609		2.2162	0.8302	1.3014	2.7112	1.3926					1.3576	
60109	2.7459	3.5003	3.0596	2.8274	3.3649	2.0317	2.2195	3.3354	2.2139	2.3104	3.4004	2.9236	2.1759
60110	16.6514	15.1323	13.283	17.4689	16.5532	27.9621	31.9608	28.9346	31.9936	22.3474	22.0573	21.8139	35.1354
60111	3.5889	3.433	5.5659	4.1132	3.8866	1.2592		1.9545	1.5158		1.905	1.9471	
60112	2.0264	2.2972	1.3203	4.2713		6.5377	2.2597	3.932	2.8766			1.8374	
61001													
61002	7.5615	9.643	9.6681	8.8914	5.6703	4.7362	3.3433	2.9652	6.2713	4.5525	4.4653	3.9809	10.5061
61003													
61004			0.8767										
61005													
61006	2.8952	2.5535	2.5567	2.6715	3.7055	3.064	3.445	3.0405	3.3774	2.7613	3.232	3.4493	2.4175
61007	4.0836	3.9558	4.2894	3.5396	5.6848	11.9996	5.9613	7.2577	7.4685	7.6397	8.5037	9.0148	13.7727
61008	1.2825	1.5236	1.5712	1.4867	2.0842	1.8987	2.0797	2.3327	2.0453			2.0046	2.0697
61009	8.7127	9.5766	5.415	7.3408	10.475	46.2589	4.5569	7.698	5.1496	5.1674	7.3047	7.6986	7.3133
61010	1.4388	3.3705	0.8557	1.6437	1.4284	1.1018			1.462				2.76
61011													
61012													
61013	16.1988	20.9579	13.3099	25.7943	13.323	29.2297	15.7155	19.7102	23.0108	18.1848	23.9081	18.3912	26.4013
61014	4.2368	6.0835	4.8856	5.6804	5.7137	5.8912	8.0522	7.0101	6.1366	5.1389	6.3932	6.3002	2.8114
61015							1.4189						
61016	29.3148	53.9995	38.8782	43.9109	22.6412	42.511	58.7577	57.846	69.6663	46.0618	63.6516	46.669	115.4853
61017			0.9522			3.3621		4.8586	1.6904			1.5948	
61018													
61019				1.9962	2.9647	170.175	61.0361	3.0516	54.2532	24.6278	10.1873	1.8281	48.6722
61020	2.0605	1.8725	2.8979	4.0444	2.9367	2.4744	2.6701	2.6675	2.8032		3.08		
61021	1.0915	5.9948	3.1516	3.0202	2.9133	8.8875	3.7284	6.9655	4.9996	2.2538	8.6036	2.829	5.7401
61022	1.8346	2.6106	1.8112	2.523	1.6089	1.9968	1.9164	2.529	3.3186	1.5547	2.7002	2.1299	3.2859
61023													
61024	12.9201	12.5666	9.6255	5.4004	13.9184	13.4234	10.6099	13.1293	16.1559	8.5121	9.2612	10.4595	17.7289
61025													
61026	4.2356	4.4657	4.3175	6.0386	6.6449	6.3861	15.3024	8.2303	11.6328	7.5373	9.5725	10.8837	10.2193
61027	3.5332	4.0281	4.7577	5.9659	3.9666	4.5998	3.0993	4.0589	4.271	2.6805	5.1003	5.0181	5.5826
61028													
61029		0.9068	1.0188	0.983									
61030	15.4211	5.8357	3.663	8.942	4.5328	14.4297	5.8647	3.749	10.7978	11.9396	24.6589	7.1699	13.4006
61031	3.1936	3.5621	2.4006	3.3315	3.0125	3.046	2.9513		3.9081	4.2736	3.4136	3.1383	7.1843
61032													
61033		0.9396		1.0562		1.2767		1.3808					
61034	0.9011	0.8704		0.6982				1.0352					
61035													
61036	0.9835	0.9469	1.6011	1.985				1.1914	1.1476	2.102			
61037		6.2907	8.3035	6.9094	4.3209	11.5626	3.4435	11.7939	15.7295	7.1925	10.1709	9.8641	3.9594
61038	3.8651	1.0085	8.8284	2.8755	1.4978	24.7247	10.6116	56.0643	5.4726	1.8855	5.6881	3.9648	22.5721
61039			0.829										
61040													
61041	0.9548	1.4187	0.9845	1.053	1.2832	1.867	2.0295		1.5664			1.515	
61042	2.0563	2.5721	3.0736	3.0059		3.5712	3.796	3.3837	3.4213	3.088	3.7598	2.6332	
61043													
61044	12.1806	26.4932	14.9677	20.1673	27.959	29.9593	30.1044	41.6535	35.4554	31.6041	24.8952	20.6507	60.0802
61045	18.6965	12.5599	18.2497	15.2606	19.6434	17.4492	25.72	24.4572	29.1215	19.3627	20.7615	22.4412	27.7182
61046			0.7727	1.3545									
61047	2.6684	4.1086	4.8736	5.0529	4.2498	2.9879	5.3962	5.838	2.0524	2.4524	2.7453	2.6775	2.5479
61048	1.8198	1.3814	1.5057	1.6189	1.8541			1.3587	1.4699			1.9077	
61049	31.9044	60.7471	35.4313	22.4522	31.8667	122.5173	45.5164	216.665	35.9217	58.846	65.2214	64.1351	43.507
61050	1.8653	2.7575	3.1823	3.381	1.83	1.6759	1.6511	2.4178	1.5569	1.6997	1.9883	1.8338	
61051	8.0296	5.093	47.1366	63.3224	47.5607	158.1502	276.6034	11.7232	121.0822	186.9593	98.1771	62.7914	203.446
61052	1.1287		2.3502		1.0251				1.602		2.2135	1.4504	2.4426
61053	9.8885	7.8244	17.4434	10.0132	9.3638	3.7125	3.4089	4.0645	4.023	3.8169	4.4761	7.1501	2.4666
61054													
61055	22.2503	25.5285	21.5054	26.6468	26.7235	41.7481	33.8725	39.6077	29.3356	30.9812	22.4138	24.8776	14.196
61056	2.7283	1.8328	3.5475	4.0917	4.1101	5.0342	5.8122	4.3953	6.1693	5.3768	5.5866	5.8766	3.8027
61057													
61058	18.9704	31.3087	9.2629	19.7856	19.2667	29.5648	13.6712	34.6654	16.4884	18.7415	15.2266	15.3476	14.6613
61059	0.8685						1.2211						
61060	1.84	2.0533	0.7144	2.43		3.415	6.8866	1.4828	2.3484	3.3501	4.239	2.7866	2.5093
61061	1.0611		1.2721	0.9257									
61062													
61063	5.4212	7.0045	11.3462	8.2509	8.2	9.142	8.3515	15.84	8.5562	7.9606	7.6663	5.559	9.2699
61065	2.3362	3.0267	1.35	2.0049	3.6763	1.4198		1.2042	2.0206	1.6194	2.2324	1.7176	2.3472
61066	1.5852	3.9303	1.1568	2.4859	2.2233	2.1148	2.9998	1.9908	2.4752			2.3515	2.0186
61067	0.9586	1.1968	1.4395	1.4993	1.3047	1.5429	1.7702	1.9427	2.0588	1.8046	2.5082	2.2568	
61068													
61069	41.0694	65.9535	34.396	48.8016	34.3326	168.1374	76.7608	128.3721	98.6935	69.7798	99.5272	66.7019	102.9136
61070	71.2198	53.366	56.9162	92.0953	85.4256	71.1526	109.2484	150.1177	114.0476	92.9851	81.2606	79.3074	44.7768
61071													
61072	0.8334			1.3488	1.8716			2.1451				1.8617	
61073	28.8461	27.3293	15.0027	23.1394	40.1556	15.7714	38.0425	42.5535	37.1372	40.4018	43.3172	27.808	27.1558
61074													
61075													
61076	24.4559	53.9165	25.7762	47.799	37.7127	68.5435	56.6496	84.1244	55.4232	44.7854	32.5073	40.2091	88.3172
61077	1.7746	2.0996	1.1951	3.0262	1.3462	0.9628	1.5051	1.4069	1.2019	1.6884	1.9295		1.9594
61078													
61080	3.9768	4.5694	3.6207	7.2967	5.459	9.0504	2.6216	3.4442	3.7029	3.4977	3.5281	2.5266	19.7446
61081						1.113							
61082													
61083													
61084			0.7568			1.5123							
61085													
61086	16.7294	17.6032	11.8376	15.9319	18.9532	23.3313	24.3129	46.8259	23.4396	21.4523	24.9404	23.1011	20.4227
61087				0.7587		1.7904		2.3388	1.4283				
61088													
61089								1.3474					
61090	5.6691	5.1996	8.4426	7.6512	7.912	5.282	8.1676	5.831	7.8254	5.2197	6.9095	6.9806	7.6637
61091				0.7578									
61092	2.0685	1.8801	2.5486	2.3594	2.2116	2.5827	2.2474	2.3161	1.8164	1.5969	2.0658		2.53
61093					1.0149	1.1806	1.388			1.9564			
61094		1.0909	3.9064	1.9694		4.451	1.3942	2.8019	1.2198				1.8782
61095													
61096													
61097	2.3593	2.4695	4.7813	2.4939	2.1573	4.4383		1.4841	1.2395		2.1341	1.4328	2.9877
61098			1.105	0.9468	1.3873		1.6122		1.5819			1.3656	
61099													
61100	49.9163	50.5398	47.0565	78.6081	76.7294	83.0167	144.0401	56.4428	79.2181	103.7957	86.1629	102.2051	84.5417
61101	0.8985	1.159	1.1692	1.114	2.1436	1.0029			1.1858			1.8725	
61102	6.9907	11.4624	14.9769	7.9406	11.5926	7.7371	9.1224	8.2638	8.1871	7.3424	8.1757	9.2352	5.5992
61103													
61104	2.9384	4.1212	3.9138	3.4079	3.5423	2.9583	2.804	2.4399	2.0287	2.6359	2.428	2.2623	2.7265
61105	1.5024		1.226			4.1743		1.8602					3.2063
61106	3.2941	3.4595	3.996	4.4059	4.2302	4.3895	5.7373	4.498	4.6419	3.7175	4.3269	4.2169	3.5623
61107													
61108	1.4482	1.4769	1.2395	1.4148	1.5517		1.4742		1.3099			1.4271	
61109								1.2549					
61110	1.3498	1.5448	1.3361	1.7337	2.4847			1.3278					
61111													
61112	4.1434	4.0507	3.4105	3.4473	5.6868	4.7699	5.0678	3.851	7.1749	4.3719	6.1062	5.8533	5.3303
62001	2.6819	6.5029	1.0613	1.149		3.5607		13.7707	1.223	2.1432			1.8183
62002	4.1498	9.657	2.7741	4.8109	3.9996	17.9531	12.4565	10.7469	9.8383	22.2762	17.0125	12.5727	28.3164
62003		1.2352	1.0759	1.1736	1.1778	1.5428		1.7382	1.6483	1.3403	1.9398		
62004													
62005													
62006													
62007	53.8155	49.9377	54.232	50.682	58.1353	22.4531	14.6809	30.16	18.9356	23.4104	28.2229	38.9397	14.147
62008	1.53	2.2352	0.9468		1.6593	1.0678	1.4672	1.2569	1.7921				
62009				0.7138		1.3531		1.084					
62010	1.2435	3.7351	2.4655	1.2827	3.7698	2.4911	2.1837		2.6578		5.2563	4.185	2.195
62011													
62012	2.0361	1.7226	1.5673	1.1072	1.8143								
62013			0.996										
62014													
62015	0.8625		0.8517	0.9946	1.0274	1.1191	1.5548	1.5432	1.3023		1.9669	1.4948	
62016													
62017	3.2525	2.4731	2.3335	2.3957	3.0209			1.7646			2.0286	2.4762	
62018	1.9742	2.9796	2.7486	4.9994	3.8519				1.2732				
62019													
62020	3.8106	4.9469	5.5159	5.8908	5.8906	8.393	7.5806	5.4752	6.4096	4.8499	6.9979	6.0693	4.4884
62021	44.5746	93.904	76.04	9.5695	135.1716	123.7391	65.6072	33.1886	47.9076	25.4648	50.9361	109.8783	25.0608
62022	3.8972	5.4184	6.4782	6.502	6.7472	5.4431	7.5456	7.0647	6.3659	5.3257	6.8506	6.6048	3.2359
62023	1.6351	2.2056	3.4899	4.0362	3.2431	2.1667			1.8914		1.9131	1.9695	6.5249
62024													
62025													
62026													
62027	5.0437	6.222	3.1311	6.5828	3.6007								
62028													
62029	1.746	1.5403	1.9252	2.6199	2.2608	3.4679	3.0378	2.3421	1.905	2.4449	3.8388	3.2704	2.8735
62030	2.0275	1.7158	3.6596	2.2484	3.0833	3.9065	5.2324	3.8031	3.7173	3.3122	5.036	3.6612	3.6737
62031													
62033	9.7287	13.7223	14.8623	14.5545	17.6965	26.529	38.0827	25.9838	25.6662	19.1778	27.8887	22.8215	11.8262
62034	9.5289	16.0815	17.3916	16.8096	19.9751	24.0212	37.6854	24.8561	27.6922	32.7807	32.9152	24.27	45.0206
62035				0.7025									
62036	3.8884	2.2545	5.8077	3.8761	1.3335	3.2869	2.4894	1.3024	2.7119	2.6073	2.5817	1.824	3.5398
62037	10.8323	6.7125	42.5588	19.1632	17.2273	24.7028	34.5687	17.7279	19.8291	25.4273	11.0326	20.7009	21.8778
62038													
62039	4.6241	6.2436	7.3813	7.5004	8.3376	8.2732	11.6808	10.2356	9.9509	7.2453	8.9152	9.6171	6.1347
62040													
62041	1.0994	0.9333			1.0945	1.56			1.209				
62042	5.0608	6.3686	7.3389	8.0759	7.8042	8.9446	13.1008	11.8353	9.4059	8.918	9.6685	10.0793	4.9853
62043						1.7022							
62044	1.1941	0.7507	1.4387	1.4552		1.8655		1.7155	1.3404			1.5655	
62045													
62047													
62048	1.2086	0.9885	0.8328	0.9498	1.1506								
62049	1.2887		0.9988	1.2754	1.8602	1.3234	2.0739	1.887		1.9759	2.8107	1.7819	
62050		1.4333				1.2334							
62051	3.0845	6.1367	3.841	3.873	2.9284	6.7209	6.762	13.1876	4.8317	4.9301	6.9204	6.8445	
62052													
62053	0.9309	1.511	0.9455	1.1147	1.6761			1.3415
[truncated: 2,769,292 more chars]
