# Supplementary material for: Corrigendum to “Identification of Differentially Expressed Genes in Pituitary Adenomas by Integrating Analysis of Microarray Data”
Source: Int J Endocrinol. 2018 Sep 6;2018:6069189. doi: 10.1155/2018/6069189 (PMC6146651; doi:10.1155/2018/6069189)
Supplement: Supplementary 1 — The raw data of the included datasets downloaded from GEO database. [file 6069189.f1.zip › row data_GSE36314_series_matrix.txt]

!Series_title	"Human prolactinoma"
!Series_geo_accession	"GSE36314"
!Series_status	"Public on Mar 08 2012"
!Series_submission_date	"Mar 06 2012"
!Series_last_update_date	"Jul 01 2016"
!Series_pubmed_id	"22635680"
!Series_summary	"Human prolactinomas (n=4, 3 males and 1 female) were obtained during trans-sphenoidal surgery as part of an ongoing accession of human pituitary tumors.  The study was approved Institutional Review Board (IRB) of Emory University, and informed consent obtained for all subjects. Tumors were microdissected and removed using the surgical microscope, rinsed in sterile saline, snap-frozen in liquid nitrogen, and stored (-80 ℃) until analysis. Each tumor fragment was confirmed independently by a neuropathologist by histology and immunohistochemistry prior to molecular analysis. Three normal pituitary glands from cadavers were obtained from the National Resource Center (NDRI, www.ndriresource.org).   Each human tissue sample was analyzed using Affymetrix Human Genome U95Av2 arrays."
!Series_overall_design	"4 prolactinoma and 3 normal pituitaries"
!Series_type	"Expression profiling by array"
!Series_contributor	"Nelson,M,Oyesiku"
!Series_sample_id	"GSM887860 GSM887861 GSM887862 GSM887863 GSM887864 GSM887865 GSM887866 "
!Series_contact_name	"Yunguang,,Tong"
!Series_contact_email	"tongy@cshs.org"
!Series_contact_phone	"3104237669"
!Series_contact_institute	"Cedars-Sinai Medical Center"
!Series_contact_address	"8700 Beverly BLVD"
!Series_contact_city	"Los Angeles"
!Series_contact_state	"CA"
!Series_contact_zip/postal_code	"90048"
!Series_contact_country	"USA"
!Series_supplementary_file	"ftp://ftp.ncbi.nlm.nih.gov/geo/series/GSE36nnn/GSE36314/suppl/GSE36314_RAW.tar"
!Series_platform_id	"GPL8300"
!Series_platform_taxid	"9606"
!Series_sample_taxid	"9606"
!Series_relation	"BioProject: https://www.ncbi.nlm.nih.gov/bioproject/PRJNA153353"

!Sample_title	"Human prolactinoma 131"	"Human prolactinoma 240"	"Human prolactinoma 273"	"Human prolactinoma 87"	"Human normal pituitary -N1"	"Human normal pituitary -N6"	"Human normal pituitary -N4"
!Sample_geo_accession	"GSM887860"	"GSM887861"	"GSM887862"	"GSM887863"	"GSM887864"	"GSM887865"	"GSM887866"
!Sample_status	"Public on Mar 08 2012"	"Public on Mar 08 2012"	"Public on Mar 08 2012"	"Public on Mar 08 2012"	"Public on Mar 08 2012"	"Public on Mar 08 2012"	"Public on Mar 08 2012"
!Sample_submission_date	"Mar 06 2012"	"Mar 06 2012"	"Mar 06 2012"	"Mar 06 2012"	"Mar 06 2012"	"Mar 06 2012"	"Mar 06 2012"
!Sample_last_update_date	"Mar 08 2012"	"Mar 08 2012"	"Mar 08 2012"	"Mar 08 2012"	"Apr 10 2012"	"Apr 10 2012"	"Apr 10 2012"
!Sample_type	"RNA"	"RNA"	"RNA"	"RNA"	"RNA"	"RNA"	"RNA"
!Sample_channel_count	"1"	"1"	"1"	"1"	"1"	"1"	"1"
!Sample_source_name_ch1	"human prolactinoma"	"human prolactinoma"	"human prolactinoma"	"human prolactinoma"	"human normal pituitary"	"human normal pituitary"	"human normal pituitary"
!Sample_organism_ch1	"Homo sapiens"	"Homo sapiens"	"Homo sapiens"	"Homo sapiens"	"Homo sapiens"	"Homo sapiens"	"Homo sapiens"
!Sample_characteristics_ch1	"gender: Female"	"gender: Male"	"gender: Male"	"gender: Male"	"gender: Male"	"gender: Female"	"gender: Male"
!Sample_characteristics_ch1	"age (y): 52"	"age (y): 39"	"age (y): 36"	"age (y): 48"	"age (y): N/A"	"age (y): N/A"	"age (y): N/A"
!Sample_characteristics_ch1	"tissue: prolactinoma"	"tissue: prolactinoma"	"tissue: prolactinoma"	"tissue: prolactinoma"	"tissue: normal pituitary"	"tissue: normal pituitary"	"tissue: normal pituitary"
!Sample_biomaterial_provider_ch1	"Nelson M Oyesiku, Emory University"	"Nelson M Oyesiku, Emory University"	"Nelson M Oyesiku, Emory University"	"Nelson M Oyesiku, Emory University"	"Nelson M Oyesiku, Emory University"	"Nelson M Oyesiku, Emory University"	"Nelson M Oyesiku, Emory University"
!Sample_molecule_ch1	"total RNA"	"total RNA"	"total RNA"	"total RNA"	"total RNA"	"total RNA"	"total RNA"
!Sample_extract_protocol_ch1	"Briefly,total RNA (100 ug) was purified, using the RNeasy Mini Kit (Cat.No.74104, QIAGEN Inc., Valencia, CA) with minor modifications. Total RNA was eluted twice with 50 ul of 65 C DEPC-treated water."	"Briefly,total RNA (100 ug) was purified, using the RNeasy Mini Kit (Cat.No.74104, QIAGEN Inc., Valencia, CA) with minor modifications. Total RNA was eluted twice with 50 ul of 65 C DEPC-treated water."	"Briefly,total RNA (100 ug) was purified, using the RNeasy Mini Kit (Cat.No.74104, QIAGEN Inc., Valencia, CA) with minor modifications. Total RNA was eluted twice with 50 ul of 65 C DEPC-treated water."	"Briefly,total RNA (100 ug) was purified, using the RNeasy Mini Kit (Cat.No.74104, QIAGEN Inc., Valencia, CA) with minor modifications. Total RNA was eluted twice with 50 ul of 65 C DEPC-treated water."	"Briefly,total RNA (100 ug) was purified, using the RNeasy Mini Kit (Cat.No.74104, QIAGEN Inc., Valencia, CA) with minor modifications. Total RNA was eluted twice with 50 ul of 65 C DEPC-treated water."	"Briefly,total RNA (100 ug) was purified, using the RNeasy Mini Kit (Cat.No.74104, QIAGEN Inc., Valencia, CA) with minor modifications. Total RNA was eluted twice with 50 ul of 65 C DEPC-treated water."	"Briefly,total RNA (100 ug) was purified, using the RNeasy Mini Kit (Cat.No.74104, QIAGEN Inc., Valencia, CA) with minor modifications. Total RNA was eluted twice with 50 ul of 65 C DEPC-treated water."
!Sample_label_ch1	"Biotin"	"Biotin"	"Biotin"	"Biotin"	"Biotin"	"Biotin"	"Biotin"
!Sample_label_protocol_ch1	"Biotin-labeled cRNA was produced with Enzo BioArray High Yield RNA Transcription Labeling kit according to the manufacturer's instructions. See Moreno CS et al (2005). Cancer Res 65(22):10214-10222."	"Biotin-labeled cRNA was produced with Enzo BioArray High Yield RNA Transcription Labeling kit according to the manufacturer's instructions. See Moreno CS et al (2005). Cancer Res 65(22):10214-10222."	"Biotin-labeled cRNA was produced with Enzo BioArray High Yield RNA Transcription Labeling kit according to the manufacturer's instructions. See Moreno CS et al (2005). Cancer Res 65(22):10214-10222."	"Biotin-labeled cRNA was produced with Enzo BioArray High Yield RNA Transcription Labeling kit according to the manufacturer's instructions. See Moreno CS et al (2005). Cancer Res 65(22):10214-10222."	"Biotin-labeled cRNA was produced with Enzo BioArray High Yield RNA Transcription Labeling kit according to the manufacturer's instructions. See Moreno CS et al (2005). Cancer Res 65(22):10214-10222."	"Biotin-labeled cRNA was produced with Enzo BioArray High Yield RNA Transcription Labeling kit according to the manufacturer's instructions. See Moreno CS et al (2005). Cancer Res 65(22):10214-10222."	"Biotin-labeled cRNA was produced with Enzo BioArray High Yield RNA Transcription Labeling kit according to the manufacturer's instructions. See Moreno CS et al (2005). Cancer Res 65(22):10214-10222."
!Sample_taxid_ch1	"9606"	"9606"	"9606"	"9606"	"9606"	"9606"	"9606"
!Sample_hyb_protocol	"According to the manufacturer's instructions. See Moreno CS et al (2005). Cancer Res 65(22):10214-10222."	"According to the manufacturer's instructions. See Moreno CS et al (2005). Cancer Res 65(22):10214-10222."	"According to the manufacturer's instructions. See Moreno CS et al (2005). Cancer Res 65(22):10214-10222."	"According to the manufacturer's instructions. See Moreno CS et al (2005). Cancer Res 65(22):10214-10222."	"According to the manufacturer's instructions. See Moreno CS et al (2005). Cancer Res 65(22):10214-10222."	"According to the manufacturer's instructions. See Moreno CS et al (2005). Cancer Res 65(22):10214-10222."	"According to the manufacturer's instructions. See Moreno CS et al (2005). Cancer Res 65(22):10214-10222."
!Sample_scan_protocol	"According to the manufacturer's instructions. See Moreno CS et al (2005). Cancer Res 65(22):10214-10222."	"According to the manufacturer's instructions. See Moreno CS et al (2005). Cancer Res 65(22):10214-10222."	"According to the manufacturer's instructions. See Moreno CS et al (2005). Cancer Res 65(22):10214-10222."	"According to the manufacturer's instructions. See Moreno CS et al (2005). Cancer Res 65(22):10214-10222."	"According to the manufacturer's instructions. See Moreno CS et al (2005). Cancer Res 65(22):10214-10222."	"According to the manufacturer's instructions. See Moreno CS et al (2005). Cancer Res 65(22):10214-10222."	"According to the manufacturer's instructions. See Moreno CS et al (2005). Cancer Res 65(22):10214-10222."
!Sample_description	"1-131"	"1-240-2 COE"	"1-273"	"1-87"	"N1"	"N6"	"N4"
!Sample_data_processing	"RMA"	"RMA"	"RMA"	"RMA"	"RMA"	"RMA"	"RMA"
!Sample_platform_id	"GPL8300"	"GPL8300"	"GPL8300"	"GPL8300"	"GPL8300"	"GPL8300"	"GPL8300"
!Sample_contact_name	"Yunguang,,Tong"	"Yunguang,,Tong"	"Yunguang,,Tong"	"Yunguang,,Tong"	"Yunguang,,Tong"	"Yunguang,,Tong"	"Yunguang,,Tong"
!Sample_contact_email	"tongy@cshs.org"	"tongy@cshs.org"	"tongy@cshs.org"	"tongy@cshs.org"	"tongy@cshs.org"	"tongy@cshs.org"	"tongy@cshs.org"
!Sample_contact_phone	"3104237669"	"3104237669"	"3104237669"	"3104237669"	"3104237669"	"3104237669"	"3104237669"
!Sample_contact_institute	"Cedars-Sinai Medical Center"	"Cedars-Sinai Medical Center"	"Cedars-Sinai Medical Center"	"Cedars-Sinai Medical Center"	"Cedars-Sinai Medical Center"	"Cedars-Sinai Medical Center"	"Cedars-Sinai Medical Center"
!Sample_contact_address	"8700 Beverly BLVD"	"8700 Beverly BLVD"	"8700 Beverly BLVD"	"8700 Beverly BLVD"	"8700 Beverly BLVD"	"8700 Beverly BLVD"	"8700 Beverly BLVD"
!Sample_contact_city	"Los Angeles"	"Los Angeles"	"Los Angeles"	"Los Angeles"	"Los Angeles"	"Los Angeles"	"Los Angeles"
!Sample_contact_state	"CA"	"CA"	"CA"	"CA"	"CA"	"CA"	"CA"
!Sample_contact_zip/postal_code	"90048"	"90048"	"90048"	"90048"	"90048"	"90048"	"90048"
!Sample_contact_country	"USA"	"USA"	"USA"	"USA"	"USA"	"USA"	"USA"
!Sample_supplementary_file	"ftp://ftp.ncbi.nlm.nih.gov/geo/samples/GSM887nnn/GSM887860/suppl/GSM887860_1_131.CEL.gz"	"ftp://ftp.ncbi.nlm.nih.gov/geo/samples/GSM887nnn/GSM887861/suppl/GSM887861_1_240_2_COE.CEL.gz"	"ftp://ftp.ncbi.nlm.nih.gov/geo/samples/GSM887nnn/GSM887862/suppl/GSM887862_1_273.CEL.gz"	"ftp://ftp.ncbi.nlm.nih.gov/geo/samples/GSM887nnn/GSM887863/suppl/GSM887863_1_87.CEL.gz"	"ftp://ftp.ncbi.nlm.nih.gov/geo/samples/GSM887nnn/GSM887864/suppl/GSM887864_1_1_COE__N1.CEL.gz"	"ftp://ftp.ncbi.nlm.nih.gov/geo/samples/GSM887nnn/GSM887865/suppl/GSM887865_1_COE__N6.CEL.gz"	"ftp://ftp.ncbi.nlm.nih.gov/geo/samples/GSM887nnn/GSM887866/suppl/GSM887866_1_N4_2_COE.CEL.gz"
!Sample_data_row_count	"12625"	"12625"	"12625"	"12625"	"12625"	"12625"	"12625"
!series_matrix_table_begin
"ID_REF"	"GSM887860"	"GSM887861"	"GSM887862"	"GSM887863"	"GSM887864"	"GSM887865"	"GSM887866"
"1000_at"	0.05278778	-0.11768246	-0.14020252	-0.008475304	0.012343407	0.24908066	0.008475304
"1001_at"	-0.018468857	-0.13713598	-0.011137962	0.2631116	0.021268845	0.027625084	-0.23591518
"1002_f_at"	-0.07252693	-0.075080395	0.19798279	-0.088475704	0.013992786	-0.057539463	-0.007786751
"1003_s_at"	0.02360344	0.086262226	-0.008907318	0.03397274	0.14427996	0.031318665	-0.09316969
"1004_at"	0.0971694	-0.003155708	0.26645374	0.18647861	0.29846	-0.05967903	-0.19183779
"1005_at"	0.07904816	1.085393	-1.3331032	-1.058033	-0.7056246	0.37886238	0.056212425
"1006_at"	0.013624668	0.09570885	0.26646614	0.097865105	-0.022202492	0.050421715	-0.22987604
"1007_s_at"	-0.10645771	-0.48421478	-0.05604267	0.20845032	0.24400425	-0.17488861	0.18731308
"1008_f_at"	0.4229803	-0.03950119	0.3804598	0.5274048	0.006001473	0.50569725	-0.28543186
"1009_at"	-0.40929794	-0.17244434	-0.18987751	-0.15421486	0.0878067	0.045841217	0.10458565
"100_g_at"	0.054454803	0.46431732	-0.16791725	-0.012056351	-0.056542397	0.06117344	-0.21172047
"1010_at"	0.24119234	0.21469545	0.10637045	-0.004712582	0.048365593	0.49357605	0.004713059
"1011_s_at"	-0.2383151	-0.7244272	0.00666523	-0.0826807	0.07247639	0.29999542	0.5657816
"1012_at"	0.013263464	0.0991714	0.21302009	0.14303946	-0.013263464	-0.15612292	-0.2919097
"1013_at"	-0.111582756	0.48425245	-0.19860578	-0.10496712	-0.029940844	-0.17468667	-0.011586666
"1014_at"	0.05789423	0.34174967	0.19158077	0.024483204	-0.015606403	-0.15724277	-0.22575378
"1015_s_at"	0.22468472	0.099522114	0.015069008	-0.012926579	0.053356647	0.13745642	-0.04395485
"1016_s_at"	-0.5214009	0.11651707	-0.37770367	1.3947368	0.118677616	-0.35826778	0.24269247
"1017_at"	-0.30747223	-0.536798	-0.17627811	-0.005223274	0.005223274	-0.05177641	0.45159006
"1018_at"	0.07521248	0.124065876	-0.1825943	-0.054096222	-0.07050133	-0.12403488	-0.07108641
"1019_g_at"	-0.04460478	0.11305666	0.032809734	-0.16766977	-0.01924944	-0.22217178	-0.005306721
"101_at"	0.029454231	0.12957811	0.10677004	0.15487385	-0.12480593	-0.014534473	4.79E-04
"1020_s_at"	-0.060019493	0.57178974	0.39076138	-0.12344265	-0.037851334	-0.39574146	0.20603752
"1021_at"	-0.20500278	0.30521107	0.018121243	0.001119614	0.16082907	0.04159832	-0.12804174
"1022_f_at"	0.07654953	0.160079	-0.0708065	-0.14250565	-0.09556103	-0.05130148	-0.03844738
"1023_at"	0.014917374	0.014204025	-0.082494736	0.14221334	0.1912198	0.114908695	0.05694437
"1024_at"	0.001656532	0.21564531	-0.001656532	-0.15092945	0.09057331	0.22077656	-0.09780645
"1025_g_at"	0.015152454	0.101891994	0.047405243	0.004725933	-0.108382225	-0.15908003	-0.22246933
"1026_s_at"	-0.011191368	0.1571598	0.038119316	0.1786766	0.037477493	0.09683895	-0.026597977
"1027_at"	0.0740366	0.045071125	-0.038645267	0.13416147	0.12473297	-0.09989977	0.021480083
"1028_at"	0.012357712	0.31627893	-0.08664274	0.18625832	0.31641006	0.11885929	-0.08623171
"1029_s_at"	0.10906935	0.27599382	0.41344023	0.06061983	-0.011511803	0.46847248	-0.015684605
"102_at"	0.036723614	0.100703	-0.075103045	0.02349186	0.043892622	-0.06372261	0.011095762
"1030_s_at"	-0.23206854	-0.19367313	-0.32782698	-0.09291172	-0.055397034	-0.08991146	0.3287182
"1031_at"	0.075808525	-0.11733532	0.4377346	0.069209576	-0.24997234	-0.05925274	-0.15703487
"1032_at"	-0.02857685	-0.00864172	-0.33620977	0.028089046	0.00864172	-0.14861012	-0.026399136
"1033_g_at"	0.1316514	0.32898045	-0.2486515	-0.037408352	0.021761417	0.14603662	-0.14345932
"1034_at"	0.047198772	-0.01130724	-0.1740346	0.10973787	-0.044142246	-0.06217432	0.08998394
"1035_g_at"	-0.04824543	0.22904015	-0.32906246	0.026072025	-0.15845394	-0.16569853	0.18199635
"1036_at"	-0.21730208	-0.13502121	0.004215956	-0.24599361	-0.21562624	-0.31813407	0.009976625
"1037_at"	0.7674093	0.03974724	0.18552256	-0.07672596	-0.03102684	-0.13431549	0.001942158
"1038_s_at"	0.006135941	-0.22992945	-0.31479597	-0.24512959	0.22203684	-0.48334455	0.23891783
"1039_s_at"	-0.59274864	-0.38253403	-0.42517328	-0.117240906	-0.06564093	0.08168411	0.578794
"103_at"	0.07526684	-0.93033457	0.2768526	-0.7733469	0.2051754	0.6749706	-0.003195763
"1040_s_at"	0.012758255	0.0370121	0.1858859	0.017662525	0.09350443	0.08226538	-0.08703947
"1041_at"	-0.17129803	0.33445978	-0.010558605	0.13978434	3.16E-04	0.17086649	-0.053498745
"1042_at"	-0.06450367	-0.020512104	-0.2799356	0.038619995	1.2788568	-0.11215401	0.020512104
"1043_s_at"	0.1907239	-0.002842426	-0.05251026	0.06531334	0.15444422	0.014140606	-0.015295506
"1044_s_at"	5.98E-04	-0.30489206	-0.2620554	0.6046753	-0.13997269	-0.009283543	0.022522926
"1045_s_at"	0.48036146	-0.042251587	0.1853509	0.019990444	-0.014859676	-0.092326164	-0.13764429
"1046_at"	0.10173941	-0.16454554	0.23985958	-0.37419844	-0.04035902	0.39598227	0.013311386
"1047_s_at"	0.10478258	0.1400485	0.13197803	-0.038851738	0.08541775	0.040936947	-0.071315765
"1048_at"	-0.8137665	-0.3025937	0.2667265	-0.63863325	-0.04990244	0.049902916	0.23549795
"1049_g_at"	-0.35460567	-0.14477253	0.15140343	-0.12871647	-0.091983795	0.31388092	0.13962364
"104_at"	0.06342411	0.12836027	0.13078737	-0.031868458	0.004754067	-0.004754543	-0.37456894
"1050_at"	-0.08410478	-0.033337116	0.06033969	0.02322936	-0.016285896	-0.1857717	-0.010871887
"1051_g_at"	-0.25646734	0.42762947	-0.16777706	-0.103924274	-0.089707375	-0.20085001	0.025497437
"1052_s_at"	-0.81172276	-0.63771963	-0.18108273	-0.9811034	1.7688856	1.2624578	1.9254694
"1053_at"	-0.24595213	0.028487682	-0.113708496	0.2260375	0.21251297	-0.14472914	-0.13276148
"1054_at"	0.099925995	0.049952984	0.014210701	-0.014210701	0.020527363	-0.1119256	-0.19175673
"1055_g_at"	-0.002025127	0.26555634	0.07576418	-0.019175053	0.12823153	0.044831276	-0.20559645
"1056_s_at"	0.037156105	0.33075285	0.27540255	0.10461998	0.22279882	0.2620864	-0.2264471
"1057_at"	-0.009928703	0.10284567	0.10013008	-0.23909187	0.52059937	0.44081593	0.3700304
"1058_at"	-0.09623432	0.04765892	-0.077032566	0.017736912	-0.10909748	-0.16402674	0.005404472
"1059_at"	0.02639103	0.31920004	0.08125496	-0.02843666	0.1236043	-0.295218	-0.28646946
"105_at"	0.017336845	-0.02864647	0.3521328	0.005289078	0.19735432	-0.03788042	-0.005289078
"1060_g_at"	0.089817524	0.4505105	0.18811798	-0.14722443	0.01390028	-0.14986467	-0.19881344
"1061_at"	-0.026154518	-0.02855444	0.14376736	0.08288002	-0.09822798	0.0280447	-0.053215027
"1062_g_at"	-0.062116146	-0.003601074	-0.098469734	-0.0065341	-0.10614681	0.014791489	-0.017054081
"1063_s_at"	-0.0542264	-0.02009201	-0.068582535	0.020915508	0.1560049	-0.2060504	-0.007414818
"1064_at"	-0.4422784	-0.6524153	-0.42039728	0.5502105	0.049953938	-0.10715532	0.14411163
"1065_at"	-0.001362801	0.32105494	0.09462118	-0.028823853	-0.07314348	-0.009796619	-0.014449596
"1066_at"	0.19620562	-0.06957245	-0.015185356	0.16613245	0.14573336	0.024878502	-0.21560717
"1067_at"	-0.11777401	0.2197566	-0.041089535	0.01931429	-0.06616974	-0.09311724	-0.124278545
"1068_g_at"	0.035126686	0.11469841	-0.012515068	0.18914318	-0.14095974	-0.060281754	-0.17357922
"1069_at"	-0.043921947	-0.06995344	0.16175652	-0.11087799	0.18540716	-0.16717291	0.21662617
"106_at"	0.105258465	0.07140112	0.1915636	-0.006695271	0.14273834	-0.031430244	-0.12942791
"1070_at"	0.004874229	-0.21499777	-0.3614931	-0.21347952	-0.10335302	-0.23735762	0.18717957
"1071_at"	0.055281162	0.011048317	-0.005947113	0.14064264	0.005946636	-0.06997967	-0.08515406
"1072_g_at"	0.026249886	0.3937559	0.073955536	0.09389591	0.10424042	0.1253252	-0.21389198
"1073_at"	-0.77341557	-0.78737545	-0.106303215	0.40557098	-0.1987772	-0.001146317	0.20635223
"1074_at"	0.23311949	-0.8216486	-0.24051046	0.124780655	-0.34425306	-0.5450454	0.10610676
"1075_f_at"	-0.035197258	0.17554307	-0.025330782	-0.026918173	-0.08845329	0.02056694	-0.09057188
"1076_at"	-0.012095213	0.21039176	0.005286217	-0.06692505	-0.005286455	-0.063476086	0.036266327
"1077_at"	-0.08528614	0.28169322	0.24351001	0.008874655	0.022964478	0.09713173	-0.008874655
"1078_at"	0.03704691	0.62780046	0.29736233	-0.17778635	-0.2260685	-0.05051899	0.042395115
"1079_g_at"	-0.056077957	0.20209551	-0.3029623	-0.13954973	-0.0535717	-0.24177694	-0.061335564
"107_at"	0.051882744	0.2509699	0.088696	-0.051860332	0.07298851	0.2400837	-0.114442825
"1080_s_at"	0.11798859	0.35506582	0.031065464	0.06525898	-0.024151802	-0.21115685	0.076663494
"1081_at"	-0.046542168	1.4710531	-0.8334608	-1.1287646	0.4834795	-1.4930005	1.739583
"1082_at"	0.13794851	0.15878582	0.2845378	0.07833099	-0.083179	-0.042338848	-0.13144779
"1083_s_at"	0.12389803	0.18172312	-0.27011108	-0.01898098	0.117174625	0.018980503	-0.07715273
"1084_at"	0.1454215	0.04435873	0.13037825	-0.008991718	0.43954372	0.24522877	-0.17021799
"1085_s_at"	0.10809326	0.32270575	-0.10902691	-0.047111988	0.057073116	-0.41482544	0.002747059
"1086_at"	-0.051989555	0.032567024	-0.055247307	0.02654934	1.07E-04	-1.07E-04	-0.13076973
"1087_at"	-0.19086075	0.16346931	-0.16846752	0.010061741	0.12044954	-0.3914547	-0.19165468
"1088_at"	0.7829242	0.49558353	0.12297058	-0.33181787	-0.21205997	-0.12315178	0.08331728
"1089_i_at"	0.34700394	0.20057201	-0.17533588	0.2154603	0.06257725	0.03817749	-0.08759308
"108_g_at"	-0.04566765	0.089019775	0.03565979	0.019695282	-0.056706905	-0.04634905	0.035725594
"1090_f_at"	0.046140194	-0.014513016	0.04203415	-0.087631226	0.034399986	-0.06457424	0.13231754
"1091_at"	-0.15614891	-0.043777466	-0.24536419	-0.051132202	0.0849781	0.12956047	0.041602135
"1092_at"	0.002221108	0.025714874	-0.002221108	0.0684309	0.09229088	-0.0416317	-0.1656332
"1093_at"	-0.17534971	1.1704764	-0.041155815	-0.27771854	-0.06541014	-0.072075844	0.32510424
"1094_g_at"	-0.23383093	0.72816896	-0.15543413	-0.03035736	-0.4240818	-0.5990877	0.03035736
"1095_s_at"	-0.002372742	0.2862165	0.002567768	-0.039419413	-0.19997191	-0.007619619	-0.16281533
"1096_g_at"	0.10823822	0.14743519	0.20417643	0.056417465	0.001047134	-0.001046658	-0.18582249
"1097_s_at"	0.06768751	0.14352131	-0.24666595	0.012831211	-0.122544765	-0.16951942	-0.09008503
"1098_at"	-1.72E-05	0.16155624	0.07874656	-0.15728879	0.03597951	1.74E-05	-0.0757463
"1099_s_at"	0.015240192	0.7677674	-0.04202223	-0.25886917	-0.0997653	0.5636883	-0.22897482
"109_at"	-0.10365915	0.23411179	0.18806839	0.40402317	-0.066458225	-0.19064999	-0.10154438
"1100_at"	0.25421047	0.15873909	-0.03869295	-0.00626421	0.46370316	0.006263733	-0.03962469
"1101_at"	0.18030024	-0.001265526	-0.44468546	0.3756795	0.1068573	0.001266003	-0.019989014
"1102_s_at"	-0.23225546	-0.01790762	-0.09360981	-0.39677382	0.01790762	0.20402193	0.022399902
"1103_at"	-0.07766819	0.014791489	-0.108624935	0.03083229	0.23770666	0.019882202	-0.038559914
"1104_s_at"	-0.14454842	0.32392883	0.34107018	0.2071209	0.86240005	-0.19602871	-0.48735046
"1105_s_at"	-0.029046535	-0.10087299	-0.19062376	-0.008633614	0.00863409	-0.19177341	0.06781483
"1106_s_at"	0.2653532	0.04516411	-0.09556055	-0.15568304	-0.21352816	0.21769476	0.17241335
"1107_s_at"	2.4857092	2.9249935	0.59236336	-0.33062458	-0.17415667	-0.33182287	0.074147224
"1108_s_at"	0.25937653	0.21873283	0.34868288	-0.078278065	-0.005528927	0.24784708	-0.022807598
"1109_s_at"	0.12094116	0.13289452	0.006628037	0.025164127	0.18043852	0.02892828	-0.23937702
"110_at"	-0.036190987	0.061553	0.11972237	0.24128246	0.09415436	0.010501862	-0.23694229
"1110_at"	-0.05892515	0.15205812	0.17258596	0.11204624	0.23833036	0.046411514	-0.097551346
"1111_at"	-0.03723955	-0.02422762	-0.08434963	0.015086651	-0.015086651	0.033833027	-0.03440714
"1112_g_at"	0.18461657	0.17582989	0.12893343	0.032894135	0.12468147	0.15143776	-0.276999
"1113_at"	-0.02878046	0.05182123	0.012946606	0.21148777	0.14387798	-0.012946606	-0.17408657
"1114_at"	-0.051058292	0.15217638	0.002547741	0.14200544	0.06917429	0.20661545	-0.28433514
"1115_at"	-0.23232985	0.12726021	-0.09744024	0.05637741	0.0937891	0.43936443	-0.10510826
"1116_at"	-0.246521	0.009756088	-0.099853516	-0.06012678	-0.009755611	-0.28605366	-0.31433105
"1117_at"	0.059624672	0.37544298	-0.063884735	0.23049879	0.035045147	-0.020115376	-0.18359041
"1118_at"	-0.001049042	0.011991978	0.001049042	-0.054632187	0.029718399	0.1230011	-0.08311796
"1119_at"	-0.19498777	-0.19095278	-0.30045414	0.36759186	-0.32585	-0.12115145	0.38781357
"111_at"	-0.029315948	0.20526886	0.27068758	0.1337552	-0.0926733	0.1502285	-0.25843668
"1120_at"	0.3459754	-8.22E-04	0.08856392	-0.0663991	0.23807383	0.36981916	-0.022694588
"1121_g_at"	0.33451366	-0.012576103	0.40040684	-0.006176949	0.19545555	0.4799881	-0.1217742
"1122_f_at"	-0.095376015	-0.037822723	-0.060643196	0.037822723	1.0200596	0.9283743	1.2929411
"1123_at"	-0.4394493	-0.6536226	-0.015154362	-0.27464437	1.136127	0.35829973	0.8556428
"1124_at"	-0.14948463	-0.109910965	-0.35850096	0.04946661	-0.046301365	0.08453655	0.003490925
"1125_s_at"	-0.14533567	0.11358023	-0.057760715	-0.10471344	0.08549547	-0.07381964	0.022849083
"1126_s_at"	-0.0236969	0.8512249	0.30148315	0.105445385	0.40776253	0.14105654	-0.01600504
"1127_at"	0.032165527	0.003512383	-0.14193726	-0.003512383	0.17414093	0.20720291	0.056251526
"1128_s_at"	0.13708639	0.108864784	0.2607622	0.06839895	-0.048497677	0.3026619	-0.004517555
"1129_at"	-0.12268925	0.16161156	0.021146774	-0.20136023	0.08373642	0.42411995	-0.10631943
"112_g_at"	-0.018712997	0.19253588	-0.03547573	-0.16901541	0.09510422	-0.3580432	0.018712997
"1130_at"	0.8090277	-0.041846752	-0.05522871	-0.13641214	0.1763339	-0.14280987	0.27213717
"1131_at"	0.012972832	1.333046	0.3326006	0.0888319	-0.0741806	-0.058506012	-0.10471821
"1132_s_at"	0.29890347	0.2531519	0.018200874	-0.003201008	-0.16550303	0.1589508	-0.051463604
"1133_at"	0.290905	0.37998533	0.33962297	0.37624264	-0.02854395	0.28493595	-0.2241683
"1134_at"	-0.052321434	-0.23505402	0.04653454	0.13780117	0.17452717	0.18769073	-0.16149807
"1135_at"	-0.29587507	0.02294159	-0.3914032	-0.18096018	0.001657963	-0.16022825	0.3967967
"1136_at"	0.012157917	0.24935675	-0.073839664	0.09725237	0.02203846	0.0598979	-0.14385319
"1137_at"	0.16805696	-0.1896596	-0.02186346	0.1776905	0.08979654	-0.07719326	-0.20367384
"1138_at"	0.041715622	0.009169579	-0.074440956	-0.2638359	4.86E-04	-0.15606451	0.3353238
"1139_at"	0.06939316	0.06855297	-0.3185258	0.002820015	-0.041062355	-0.18079472	-0.1269288
"113_i_at"	-0.1344347	0.15410948	-0.24276114	-0.23664236	-0.2962551	0.031148434	0.023192406
"1140_at"	-0.4150424	-0.20504999	0.23142242	0.25891447	0.21760464	0.16491556	0.009557724
"1141_at"	-0.001735687	0.001735687	-0.0987525	-0.050181866	-0.035529613	0.2830143	-0.226645
"1142_at"	0.1594572	-0.022869587	0.29149532	0.153512	0.23333359	0.022869587	-0.112027645
"1143_s_at"	-0.079221725	0.10858059	0.071507454	-0.07460642	-0.0127244	0.055628777	0.1321311
"1144_at"	0.2031827	-0.07448435	-0.044420242	0.03508091	0.14610243	-0.16244459	-0.067082405
"1145_g_at"	0.36929655	0.005714893	0.35664892	0.3192873	0.38726044	0.006862164	-0.12499905
"1146_at"	0.26293898	0.045607567	-0.15007496	0.019926071	0.056312084	-0.19378853	-0.09227228
"1147_at"	1.10E-04	0.1434412	-0.32331133	0.18644667	0.12786674	-0.002693653	0.17177296
"1148_s_at"	0.45657253	0.8094897	-0.5543208	-0.05436945	-0.130579	-0.3379836	0.09566736
"1149_at"	0.20599079	0.43825293	0.28722954	-0.013700008	0.29735565	0.49495935	-0.04548502
"114_r_at"	0.29028416	0.5287533	0.5178113	0.037427902	0.17920971	0.5281348	-0.037427425
"1150_at"	-0.041218758	0.015083313	0.44692373	-0.07164955	-0.25999737	-0.5328798	0.013785839
"1151_at"	-0.38741875	-1.120923	-0.006469727	-0.06843281	-0.10450554	0.08794689	0.08994293
"1152_i_at"	0.40840816	0.35356188	0.69065714	-0.015462399	-0.024639606	0.32167768	-0.16514397
"1153_f_at"	-0.1672287	-0.37096786	0.029471397	-0.05837536	0.93021965	1.4971628	1.3452435
"1154_at"	-0.06904364	0.230968	-0.21848011	0.16253614	-0.03508234	0.008433342	-0.16327667
"1155_at"	-0.2586894	0.035051823	-0.19119692	0.015961647	0.019773483	-0.08319998	-0.0790081
"1156_at"	0.17540169	0.14473677	0.25671482	-0.25059557	0.14806509	-4.69E-04	-0.24407196
"1157_s_at"	-0.066504	-0.132864	-0.17790031	0.16478634	-0.19935226	-0.10489321	0.060183525
"1158_s_at"	0.17244816	-0.0904665	-0.19029617	-0.095106125	-0.30240202	0.122553825	-0.007634163
"1159_at"	0.09681535	-0.056789637	0.012914658	0.19922614	0.21317673	0.030274868	-0.18573117
"115_at"	0.27777147	0.19431686	0.14018297	-0.15074253	-0.005712986	0.11697388	-0.20913029
"1160_at"	0.11050987	0.006474495	-0.055915356	0.36707592	0.036421776	0.34353638	-0.07538128
"1161_at"	0.029287338	-0.3516779	0.43252563	-0.023108482	-0.07798576	-0.0985136	0.013735771
"1162_g_at"	0.23454285	-0.03522587	0.41596317	-0.085409164	-0.18041897	0.014670372	0.09466171
"1163_at"	0.13217497	0.11951256	0.20712566	-0.06825447	0.07842493	0.07633543	-0.105831146
"1164_at"	0.08115864	0.061657906	0.15226889	0.15314579	-0.06501198	-0.2007122	-0.09490824
"1165_at"	-0.15454698	-0.113408804	0.008674622	0.088228464	-0.07154894	-0.14559317	-0.04127884
"1166_at"	0.057793617	-0.023231506	0.23788548	0.19823647	-0.016887665	-0.01480484	-0.026096344
"1167_s_at"	0.0378685	0.068528175	0.02039814	-0.05756569	0.0185318	0.058530807	-0.17848587
"1168_at"	-0.002191544	0.05936098	0.18498039	0.15771818	-0.17584419	-0.10857487	-0.05688858
"1169_at"	0.042994976	0.017679214	0.088564396	0.03650236	-0.23154211	-0.017679214	-0.20302248
"116_at"	-0.062128067	0.2201581	0.15136147	-0.001634598	-0.22028923	-0.023308277	0.005129814
"1170_at"	-0.123680115	0.05057144	-0.19622517	0.034288406	0.13801146	-0.001564503	-0.01778078
"1171_s_at"	-0.3334546	0.18497276	-0.37039948	-0.009147167	0.054283142	0.036379337	-0.09515619
"1172_at"	0.15652895	0.022201538	0.3301468	-0.04257536	0.09410715	0.37911654	0.07271767
"1173_g_at"	-0.080631256	-0.6464462	-1.3439646	-1.1913137	2.1907368	0.1299696	1.3638515
"1174_at"	-0.074509144	0.14459753	-0.039298534	0.007623196	-6.84E-04	0.19033766	-0.057665348
"1175_s_at"	0.03690052	0.06853247	0.24878168	-0.34074306	0.09436846	-0.058746338	-0.018369198
"1176_at"	-0.13380241	0.090304375	-0.24066448	-0.056935787	0.14934397	-0.09776497	-0.024976254
"1177_at"	0.025242805	-0.018545628	-0.04112196	0.04380226	0.1015439	-0.07117367	-0.03621149
"1178_at"	0.10825348	0.14743185	0.01322031	-0.022034645	-0.043055534	-0.028148651	0.26994276
"1179_at"	0.035226822	-0.35142708	-0.035226822	0.34753036	-0.6631899	-0.25637054	-0.3409567
"117_at"	0.23169708	0.18060255	0.2820649	0.003036499	0.59394073	0.21789551	-0.044967175
"1180_g_at"	0.002257347	-0.08369541	-0.41506863	0.218997	-0.5466385	0.0935936	-0.29769993
"1181_at"	0.23630047	-0.03224325	0.2919526	0.049077034	0.058906555	0.18508482	0.02633667
"1182_at"	0.17759013	-0.06100464	-0.17651534	0.005664587	-0.045162678	-0.0680573	-0.055737734
"1183_at"	0.24484539	0.21872425	0.54055786	0.08976412	-0.010648727	0.010648727	-0.11916208
"1184_at"	0.17811298	0.6815071	-0.47305536	0.029094696	-0.034446716	0.06933403	-0.029094696
"1185_at"	0.09407377	0.085226536	-0.002762318	0.25454473	0.002762318	-0.088643074	-0.18645954
"1186_at"	0.4776826	0.07752037	0.06998682	0.09539127	0.052713394	0.14022207	-0.26342583
"1187_at"	0.08455992	0.05971527	0.25424814	-0.11281252	-0.004337788	0.055808544	-0.06682396
"1188_g_at"	0.024963856	0.32043266	0.46161795	-0.12642908	0.047479153	0.34362745	-0.028976917
"1189_at"	0.39048624	-0.048101902	0.001215935	-0.008018494	-0.008781433	-0.03940296	-0.030788898
"118_at"	0.18536663	0.19096851	0.24448061	0.0737524	0.002274036	0.07990599	-0.2852087
"1190_at"	0.15963507	-0.1704526	0.008640051	-0.00755024	0.042464256	-0.1171639	0.007550001
"1191_s_at"	0.19910383	-0.014044285	-0.043361664	-0.16742992	0.20297098	0.07927561	-0.008032322
"1192_at"	0.13380194	-0.7778864	0.24587536	-0.13380241	-0.18896103	-0.24744749	0.458251
"1193_at"	8.46E-04	-8.46E-04	0.123040676	0.037863255	0.022619724	0.006307125	-0.14101982
"1194_g_at"	0.28547335	0.09944916	0.051986694	-0.013114929	0.002113819	0.15759754	-0.22248697
"1195_s_at"	-0.27272844	-0.43372202	-0.12734747	0.30862808	0.05043173	-0.003274918	-0.08010721
"1196_at"	0.02345848	0.16658163	0.006797314	-0.02489376	-0.019602776	-0.049599648	-0.21216393
"1197_at"	0.15536737	0.009972096	0.24426603	0.1084733	0.26566458	0.23465061	-0.009972096
"1198_at"	0.12323642	-0.17861652	0.026287556	-0.14399886	0.040445328	-0.2778809	-0.009132147
"1199_at"	-0.006599426	-0.24342346	-0.34664726	-0.058023453	0.13669682	-0.08895874	0.28403568
"1200_at"	-0.036429882	0.120082855	0.20828342	0.15729618	0.007574558	0.2555251	-0.2719698
"1201_at"	0.12076664	0.18899107	0.13046789	-0.12259483	-0.13225126	-0.08294535	0.047507286
"1202_g_at"	-0.2703023	0.11482382	-0.122963905	-0.10786104	0.15184069	-0.24001265	0.004252434
"1203_at"	0.17786598	0.25296402	-0.14769506	0.001006603	-0.052033424	0.14963102	-0.42199564
"1204_at"	-0.121798515	-0.17440224	0.036593914	0.027380466	-0.15238285	0.15777779	0.03346157
"1205_at"	-0.08159685	0.078139305	0.045062065	0.14825964	0.02559185	0.06378746	-0.15840197
"1206_at"	-0.063735485	0.12267923	0.18142414	-0.005814552	-0.45538235	0.0536108	-0.2281251
"1207_at"	-0.06337023	0.04866457	-0.14229679	0.03117752	0.03744507	-0.07758236	-0.063919544
"1208_at"	0.05776596	0.17137861	0.07728815	0.029123306	-0.0084939	0.011654854	0.006778717
"1209_at"	0.040319443	4.85E-04	0.00206089	0.050617218	-4.85E-04	-0.13351059	-0.059767246
"120_at"	0.4542737	0.3060851	-0.042102814	0.11723471	-0.15123367	-0.31333303	-0.089874744
"1210_s_at"	0.17748213	0.1604147	-0.001843929	0.12096548	0.13281822	0.16604042	-0.15595913
"1211_s_at"	-0.3512106	-0.3605733	-0.8789964	0.3671198	0.06426859	0.502759	0.4195118
"1212_at"	0.09670305	0.37113523	0.03330469	0.17590284	-0.05084896	0.25888395	-0.15295267
"1213_at"	0.1812067	-0.29534483	-0.20215702	0.4732132	-0.61506987	-0.30664968	-0.22133875
"1214_s_at"	0.36051798	0.18808937	0.17505026	0.114022255	-0.039125443	-0.10398722	-0.15508938
"1217_g_at"	0.27072477	0.3747983	0.094984055	0.073993206	-0.001144886	-0.004807949	-0.010595799
"1218_at"	0.2981553	-0.11061716	0.21855545	-1.86E-04	-0.017688751	0.10294819	-0.18318844
"1219_at"	0.040352345	0.007604122	-0.25659323	-0.007603645	0.018735886	-0.19508982	-0.07081938
"121_at"	0.030944824	0.1017437	0.013082504	0.103126526	-0.07786751	-0.013082504	-0.014075279
"1220_g_at"	0.06698465	0.002954006	0.03374815	0.18167925	0.1268301	-0.13972998	-0.19908428
"1221_at"	0.11939287	0.111718655	0.113740444	0.12653112	-0.07304096	0.038075924	-0.16812849
"1222_at"	0.21219397	0.18946409	0.23939514	0.028470516	0.032639027	-0.08087349	-0.1173172
"1223_at"	0.14155054	0.035072803	-0.07610607	0.10550642	0.0678072	-0.04081011	-0.13819122
"1224_at"	0.20325184	-0.42199612	-0.001941204	0.024873734	-0.21638918	-0.21690035	0.001940727
"1225_g_at"	0.109558105	-0.47536135	-0.06375837	-0.062295914	-0.065143585	-0.093987465	0.11283302
"1226_at"	0.7685585	-0.091403484	-0.16287756	0.09778309	0.37282658	-0.04017496	0.032496452
"1227_g_at"	0.54594755	-0.017369747	-0.04182625	0.112066746	-0.011316776	0.07439613	0.011316776
"1228_s_at"	-0.385067	0.040625572	-0.518291	0.2516842	-0.036758423	-0.14066792	-4.73E-04
"1229_at"	0.13583136	-0.208179	-0.23147249	-0.064003944	0.38835144	-0.12164974	0.006832123
"122_at"	-0.06904125	0.068843365	0.08921528	0.047685623	-0.16620016	-0.042787552	-0.045627117
"1230_g_at"	0.1052475	-0.16168022	-0.6392002	-0.04872513	0.32988882	-0.21978283	0.048725605
"1231_at"	-0.26027775	7.39E-04	-0.08625126	-0.19432926	-0.07157278	-0.13126278	0.017621994
"1232_s_at"	0.20182419	0.13872719	0.080926895	-0.09407425	-0.003805637	-0.18998384	-0.058953762
"1233_s_at"	-0.12247658	0.1371193	0.26121902	0.086488724	-0.12095165	-0.15331459	-0.005126953
"1234_at"	0.044353485	0.19327211	-0.11038637	0.21470785	-0.044353485	-0.13222265	-0.11431265
"1235_at"	0.17649746	-0.7830982	-0.25218773	0.3313284	-0.35630703	-0.11985302	0.29927444
"1236_s_at"	0.06184101	0.19870472	-0.052922726	0.022073269	-0.08786631	-0.050436974	-0.033470154
"1237_at"	0.18374681	0.3104372	0.03490162	-0.110031605	0.83577347	-0.19564152	1.2044191
"1238_at"	-0.12368679	-0.16287708	-0.050527573	-0.138731	-0.07119703	-0.16235018	0.2099595
"1239_s_at"	0.20022821	0.002704144	-0.002703667	0.019702911	0.24843597	-0.009273052	-0.21540356
"123_at"	-0.04847908	0.39797258	0.118024826	-0.010816097	0.0054245	-0.2205491	-0.0054245
"1240_at"	-0.100707054	0.060801983	-0.12423754	0.113004684	-0.024935722	-0.110206604	-0.12268591
"1241_at"	-0.1515913	-0.36656666	-0.18327427	-0.08162022	0.5709858	0.12410927	0.39897823
"1242_at"	0.12108612	-0.009625435	-0.032377243	0.23979855	0.06357288	-0.01156044	0.15948296
"1243_at"	0.17092943	0.14528847	-0.048858166	0.103630066	0.019578934	0.010883331	-0.12929726
"1244_at"	0.14053822	0.196177	-0.049646854	0.043814182	-0.01027298	-0.15371275	-0.22220278
"1245_i_at"	0.13239479	-0.019154072	0.32960176	-0.14869928	-0.28988743	-0.1417675	-0.10365343
"1246_at"	0.21687222	0.46707153	-0.03252983	0.03252983	-0.09765911	-0.09109402	-0.096666336
"1247_g_at"	0.21221542	0.23947668	0.12331438	0.09229803	-0.24510813	-0.08286619	-0.38597584
"1248_at"	0.056005955	0.055692196	-0.13341045	-0.4209633	0.25858927	0.06483412	-0.021877289
"1249_at"	0.02818489	0.05439663	0.26908493	-0.013153553	0.007587433	0.21417618	-0.11908269
"1250_at"	-0.44127798	-0.5115886	-0.26448154	0.22944403	-0.3014984	-0.38652372	0.021224976
"1251_g_at"	0.31588173	-0.22217894	-0.07018232	0.021171093	0.102166176	0.032815933	-0.017478943
"1252_at"	0.051639557	-0.19593811	-0.72112656	-0.20718288	-0.22856236	0.13184547	0.3017702
"1253_at"	-0.005549431	0.21911526	0.10619593	-0.011253834	0.10226345	-0.08470678	0.005549431
"1254_at"	-0.033971786	0.038161755	-0.038032055	-0.041357994	0.059236526	-0.001150131	-0.025399685
"1255_g_at"	-0.16104889	-0.037700653	-0.17343664	0.07465172	-4.19E-04	-0.08768892	-0.2110672
"1256_at"	0.014255524	0.13818264	-0.29277086	-0.004086018	-0.063373566	-0.09821367	-0.14461613
"1257_s_at"	0.49856663	0.33934212	0.13309288	0.05922222	-0.05922222	0.15161133	-0.15631962
"1258_s_at"	-0.009563446	-0.008424282	-0.19442987	-0.14096403	0.007074356	-0.15990448	-0.007074356
"1259_at"	-0.008814335	0.07824516	0.033994198	0.17913294	0.008814335	-0.15068483	-0.14146614
"1260_s_at"	-0.013113976	0.19333601	0.21843052	-0.093485355	-0.18347979	-0.011861801	0.011861801
"1261_i_at"	0.037113667	0.10588503	-0.12872839	-0.03711319	-0.047678947	-0.29217148	-0.050055027
"1262_s_at"	-0.35607576	0.05446577	0.035722256	-0.05290985	-0.20222044	0.20015001	-0.33436632
"1263_at"	-0.13200998	0.013993263	-0.2574811	0.03147888	0.11483669	-0.09155464	-0.28557682
"1264_at"	0.2658553	0.19165897	0.21116734	0.027328968	-0.028401375	-0.10296965	-0.08987522
"1265_g_at"	-0.07599163	0.009857655	0.10792112	0.040121555	-0.31636572	-0.04431343	0.05460787
"1266_s_at"	0.030397892	-0.002681255	0.16026306	0.15794992	-0.17318344	-0.051229477	-0.13057518
"1267_at"	-0.057796	0.19404459	0.26292562	0.357944	-0.23199558	-0.27000952	-0.26910686
"1268_at"	0.2595415	-0.08799553	-0.09536934	0.052598	-0.47913837	-0.2730093	-0.011357307
"1269_at"	0.058465004	-0.022037268	0.1379509	-0.14800668	-0.08693528	0.2134943	0.18508053
"126_s_at"	0.17902899	-0.06011772	0.1209507	-0.053889513	0.18089485	-0.07644844	0.007080317
"1270_at"	0.32225418	0.003992081	-0.08523178	0.04383278	0.03342533	-0.11548042	-0.1197834
"1271_g_at"	0.13349962	-0.07748175	-0.06841326	0.19249201	0.010691166	-0.085082054	0.028138638
"1272_at"	0.1097393	-0.14274979	0.34236908	0.030998707	0.20989752	-0.030998707	-0.08191109
"1273_r_at"	0.40697384	0.29321575	0.57153416	0.04189968	0.102311134	0.4693432	-0.04189968
"1274_s_at"	0.21123314	0.5372958	0.37376642	0.14737988	0.022832394	0.19135857	-0.022832394
"1275_at"	-0.110412836	0.13906884	-0.09610629	-0.08446026	-0.1318078	-0.043887377	-0.07530427
"1276_g_at"	-0.17992306	0.001275063	-0.20970345	0.05950308	0.12204456	-0.001274586	0.027402878
"1277_at"	0.48695087	0.03624344	0.38537693	0.18816948	0.20980453	0.01606512	-0.06883335
"1278_at"	0.020946503	-0.10734367	-0.13158703	0.57715034	0.15365648	-0.29952192	0.043121815
"1279_s_at"	0.11716366	0.2682252	0.112336636	0.038452625	-0.011462688	0.22717762	0.011462688
"1280_i_at"	0.011247635	0.054279804	0.013696671	-0.037455082	-0.5394511	-0.17334032	0.053267956
"1281_f_at"	0.057229996	0.18781471	0.02695179	0.26567507	-0.21938515	-0.15907001	-0.30273676
"1282_s_at"	0.43153095	0.15864372	0.031380653	-0.015833855	-0.13620567	-0.16129494	-0.14281464
"1283_at"	0.2797475	0.31090784	0.20654821	0.11366463	-0.011253357	-0.07121658	-0.30144548
"1284_at"	0.09857845	-0.08463907	-0.21399498	0.11841297	-0.13101816	-0.010037899	0.14416838
"1285_at"	-0.2505145	0.05778885	0.29297638	-0.018567562	-0.2023611	-0.2575574	0.018567562
"1286_s_at"	-7.21E-04	0.31552315	0.41439772	7.21E-04	0.027087927	0.20043659	-0.14320636
"1287_at"	-0.36414957	-0.54680395	-0.36094093	0.25670242	-0.23102474	-0.10344696	0.06506443
"1288_s_at"	-0.1692791	-0.08106613	0.33252907	0.18283749	0.12726784	-0.05589485	-0.003693581
"1289_at"	0.06658459	-0.019820213	-0.067546844	-0.013554573	0.053408623	-0.147398	-0.11623955
"128_at"	0.11067295	-0.017564297	0.03634739	-0.09891653	0.017564297	0.15757799	-0.08550453
"1290_g_at"	-0.14477587	-0.1104269	-0.1679864	0.057875633	0.106897354	-0.11181021	-0.115813255
"1291_s_at"	0.048294544	0.24998236	0.12228823	-0.10244846	-0.17886162	-0.02077341	-0.025353909
"1292_at"	-0.14238214	-0.1138854	-0.12435055	-0.13539457	0.12624884	0.8513813	0.68730164
"1293_s_at"	0.15475082	0.39554882	0.43487692	0.13727379	0.12656975	0.45774603	-0.1653552
"1294_at"	0.3755107	1.0585957	-0.016740322	0.03075409	-0.02162981	0.016740799	-0.32856035
"1295_at"	0.34056425	-0.13408232	-0.9944339	-0.216043	0.12550354	-0.3539896	0.32093048
"1296_at"	0.23034668	0.2687006	0.06905937	-0.04435253	0.03996849	0.06562996	-0.20370007
"1297_at"	0.014009476	-0.15574169	0.22260427	0.33434963	-0.19089842	-0.4682784	-0.19888163
"1298_at"	0.05035472	0.09755087	-0.0772841	-0.13532948	-0.10756993	0.1704917	-0.20390391
"1299_at"	0.14905977	0.05006361	0.38622427	0.08010197	-0.02067852	0.06998396	-0.1556859
"129_g_at"	0.20894718	0.23652172	0.005045891	-0.13470793	0.005784988	-0.08359814	-0.17514133
"1300_at"	0.004052639	0.21159458	-0.004052639	0.051903725	-0.17733574	-0.16290379	-0.07303429
"1303_at"	-0.10157204	-0.037632942	0.062399864	0.1418457	0.010102272	-0.53645563	-0.010102272
"1304_at"	-0.1736908	0.093551636	-0.003809929	-0.046442986	0.11675453	0.19034815	-0.15309048
"1305_s_at"	0.06563568	0.015996933	-0.117889404	0.12219238	-0.003081322	-0.14384079	-0.22219181
"1306_at"	0.2698412	0.15947247	-0.018920898	0.10746384	-0.01244545	-0.27469206	-0.17228222
"1307_at"	-0.6692815	-0.28226042	-0.035129547	0.47786665	-0.24069595	-0.27045155	0.15655184
"1308_g_at"	-0.06805229	0.02223444	0.18614721	0.09806728	-0.17057228	-0.022234917	-0.26904202
"1309_at"	0.024578094	0.077358246	-0.060606003	-0.003669739	0.14034462	0.2404356	0.0741272
"130_s_at"	0.12931538	0.21774435	0.10928917	0.04979372	0.14177513	0.12367916	-0.1655302
"1310_at"	0.06478977	-0.0355587	-0.2838211	-0.09198189	0.14925957	0.11357021	-0.12619019
"1311_at"	-0.08037758	-0.3906288	0.10933018	0.11823559	0.24198723	0.15618515	-0.06464672
"1312_at"	0.18510246	0.036125183	0.23299217	-0.26205826	0.027472496	-0.027472496	-0.08109379
"1313_at"	-0.2675295	-0.15586233	0.29866838	0.5092907	-0.1613388	-0.12960863	0.07882023
"1314_at"	-0.025096893	-0.27394438	0.010416508	-0.010416508	0.12193203	0.20151329	0.21278715
"1315_at"	-0.12776947	-0.1808548	-0.059280396	-0.09320164	0.15855408	0.19728947	0.24780178
"1316_at"	0.12798834	0.2106371	-0.18646145	-0.12021685	0.19731236	0.006584168	-0.2225337
"1317_at"	0.13015032	0.06841898	0.049335957	0.057116985	0.03946972	-0.04134941	-0.063937664
"1318_at"	-0.0062747	-0.4574828	0.006274223	-0.038664818	-0.20743895	-0.39492607	0.33818436
"1319_at"	0.006314278	-0.20608664	-0.33142185	0.29655123	-0.006314278	-0.02233982	0.04505062
"131_at"	-0.001835823	0.10003948	0.104655266	9.25E-05	-0.073263645	-0.00866127	-0.11727524
"1320_at"	0.05419588	0.09126186	-0.16725159	0.005446911	-0.05101919	-0.040400982	-0.08171177
"1321_s_at"	0.027449131	0.20800447	-0.06941223	-0.094418526	0.1412344	-0.04115534	-0.09731293
"1322_at"	0.02638483	0.010652542	0.05920601	-0.02153778	-0.14968824	-0.03945589	-0.26159573
"1323_at"	-0.16412449	-0.08646393	-0.14760876	0.055487633	-0.1951809	0.100315094	-0.03883171
"1324_at"	0.08568096	0.059138298	-0.02247572	0.26690292	0.062499523	0.011378288	-0.30082464
"1325_at"	-0.17205	-0.3800969	0.058670998	0.35508108	-0.31359577	-0.27985573	-0.058671474
"1326_at"	0.2331829	0.20466375	0.12397528	-0.011816978	0.09863615	0.22774363	-0.06587744
"1327_s_at"	0.31742907	-0.10583973	1.3155613	0.10583973	-0.8536377	-1.3624678	-0.27491665
"1328_at"	0.01200819	-0.04614234	0.11160231	0.04169464	0.07575464	0.16064477	-0.01200819
"1329_s_at"	-0.38511896	-0.64888525	-0.015623093	0.04895687	-0.20008993	-0.3679657	0.06299114
"1330_at"	0.0248003	0.073747635	0.09195995	0.23911476	0.16606474	-0.04254818	-0.051528454
"1331_s_at"	0.24991846	0.19714737	-0.11659098	-0.04524851	0.023683548	0.06346893	-0.14734459
"1332_f_at"	-0.16908407	-0.09286165	-0.23585796	-0.16364384	6.863391	6.5918036	6.5042534
"1333_f_at"	-0.005648136	-0.045463085	0.005647659	0.026255608	0.045889378	0.315763	0.0163064
"1334_s_at"	-0.056316376	0.14200783	0.20027447	0.056316376	0.11328411	-0.08223534	0.085933685
"1335_at"	-0.021995068	0.22729301	0.00797224	0.002723694	0.0859046	0.20384026	-0.002723694
"1336_s_at"	-0.072144985	0.16264868	-0.003643513	-0.05680561	0.15866661	0.04773426	0.003643513
"1337_s_at"	0.32625246	0.24114513	0.1013484	0.018007278	-0.18469286	-0.10506487	-0.23261452
"1338_s_at"	0.2041173	0.0927186	0.067463875	0.16295576	-0.22142696	0.1808424	-0.3019042
"1339_s_at"	-0.053398132	0.17782974	0.011552334	0.2832656	0.027235508	-0.086414814	-0.07070446
"133_at"	0.22771692	0.040832996	0.048902035	0.26623392	-0.011592388	-0.17357397	-0.06803751
"1340_s_at"	-0.010238647	0.43649864	-0.037879467	-0.027082443	0.043108463	-0.099114895	-0.06183529
"1341_at"	0.3150363	0.3574524	0.50440264	0.040680885	-0.001531601	0.38132	-0.13645267
"1342_g_at"	-0.34381175	-0.075585365	-0.003149033	0.04643488	-0.29516625	-0.08269501	0.15237474
"1343_s_at"	0.029729605	-0.1583612	-0.12215519	-0.001880884	0.26866746	-0.20011616	0.09779549
"1344_at"	-2.50E-04	0.06320953	0.13508606	0.18629456	0.010884762	-0.052722454	-0.09572983
"1345_s_at"	0.073263645	0.022693157	0.22242212	0.1612463	-0.028699398	0.001609325	-0.19231367
"1346_at"	-0.005175591	-0.21339512	3.80E-04	0.08078003	0.05906391	-0.037781715	-0.021429062
"1347_at"	-0.12819052	0.130023	-0.002571106	-0.081624985	0.115281105	0.54668427	0.002571106
"1348_s_at"	-0.08945036	-0.4656639	0.05326605	-0.06302786	0.14112616	0.24832201	0.159204
"1349_at"	0.15852499	0.10543871	0.20173073	-0.10657239	-0.102268696	0.22927284	-0.13761187
"134_at"	-0.038825512	0.08655596	0.22364283	-0.102380276	-0.1481595	0.1087389	-0.050130844
"1350_at"	0.17395878	0.2831745	0.059491634	0.11442089	0.2332797	0.16020536	-0.05949211
"1351_at"	0.25937605	-0.021109104	0.22253513	0.076919556	0.021109104	-0.22222042	-0.18650866
"1352_at"	-0.10070372	0.01014328	0.08262253	0.08109379	0.03722906	-0.043492317	-0.10270691
"1353_g_at"	0.115193844	0.05388546	0.006276131	0.038490772	0.23516369	0.16727018	-0.15281439
"1354_at"	0.04600954	0.13036776	0.13789606	0.009829998	0.11810064	0.07203531	-0.044668674
"1355_g_at"	-0.18092728	-0.018185616	-0.18162727	0.018185616	0.019874096	-0.15389395	-0.08961725
"1356_at"	0.09422588	-0.11947155	0.033628464	0.07129574	0.34333658	0.22478962	-0.19097567
"1357_at"	0.031336784	-0.06061983	0.006554127	0.07025957	0.08369589	0.2349248	-0.058691025
"1358_s_at"	1.3475475	1.7982864	0.3915434	-0.6107521	-0.2782383	-0.27439785	-0.11327839
"1359_at"	0.068291664	0.24480057	-0.002286911	0.047425747	-0.010091782	-0.037489414	-0.13962078
"135_g_at"	0.13453627	-0.00575304	0.12420893	-0.003147125	-0.017262936	-0.057169437	-0.011717796
"1360_at"	-0.045985222	0.4189663	-0.05348277	0.003265619	-0.17723322	0.009917498	-0.15633512
"1361_at"	0.001410961	-0.08355188	0.24435091	0.37461424	-0.36069155	0.19777107	-0.082579136
"1362_s_at"	0.043996334	0.08251095	0.3148489	0.06545162	-0.21557522	-0.27886868	-0.14533758
"1363_at"	-0.13551474	-0.13374424	-0.40795422	-0.15234709	0.20760489	0.05640602	0.39869642
"1364_at"	0.9762387	-0.10919094	0.9912205	-0.20313382	-0.16526818	-0.1465149	0.03267479
"1365_at"	0.47001076	0.016300678	0.36282396	0.034911156	0.006347179	-0.10249376	-0.15794516
"1366_i_at"	0.007644653	0.08364105	-0.23124123	0.09321976	0.35473728	0.092368126	-0.007644653
"1367_f_at"	0.39309692	0.13235474	-0.04171467	0.2692318	0.04171467	-0.28454304	-0.10789108
"1368_at"	0.06740618	-0.3566394	0.08565664	-0.32211494	0.9528909	-0.5013504	0.1146698
"1369_s_at"	0.05117941	0.044984818	-0.036965847	-0.001701355	0.12224865	-0.0939827	-2.62E-04
"136_at"	0.003546715	0.09354305	-0.020104408	0.027480125	0.09824753	0.007136345	-7.98E-04
"1370_at"	0.08453512	0.13698578	-0.13639832	0.04809475	-0.001001835	0.001001358	-0.1501298
"1371_s_at"	-0.020608425	0.09844828	-0.041009426	-0.044603348	0.12397623	-0.039729595	-0.018817902
"1372_at"	0.035188675	0.15645647	-0.14682913	0.07524252	-0.021235943	-0.28622913	-0.17547321
"1373_at"	0.19612837	0.2593994	0.06095743	-0.04667616	-0.01746273	-0.08134842	-0.051917553
"1374_g_at"	0.09019947	0.12979317	0.1596775	0.083483696	0.010022163	-0.13684845	-0.18324947
"1375_s_at"	-0.07569456	0.4952917	0.324265	-0.20533085	-0.16474295	0.1350131	-0.023389816
"1376_at"	0.14355707	0.30158138	0.029785156	-0.04879713	-0.028656006	0.009852409	0.107176304
"1377_at"	-0.034086227	0.0938735	-0.10883522	0.023769379	-0.023768902	-0.26248693	-0.1284895
"1378_g_at"	0.22800446	0.010387898	0.094631195	-0.010387898	-0.040310383	-0.122291565	-0.13271809
"1379_at"	0.15911579	0.16871595	-0.018959045	0.039260387	-0.15329313	-0.08130264	0.018959522
"137_at"	0.100468636	0.26039267	-0.02082491	0.039103508	0.2772417	0.47576094	-0.10814524
"1380_at"	-0.10792518	-0.045375824	0.09757447	-0.008087635	0.20313978	0.09253049	-0.19268155
"1381_at"	0.2795329	0.11810017	0.3943386	0.019503117	0.0640707	0.17584181	-0.00301981
"1382_at"	-0.04348755	-0.014746666	-0.05048561	-0.051799297	0.014746666	-0.036806107	0.33016968
"1383_at"	0.014509678	-0.37834167	-0.32024002	0.19605446	-0.014509678	-0.15948343	0.15593815
"1384_at"	0.06646061	0.2889433	0.05009842	-0.028267384	-0.223907	-0.058408737	0.028267384
"1385_at"	-0.2712555	-0.03647232	-0.23828363	0.014538765	0.9298425	0.3151164	0.24022293
"1386_at"	-0.11565399	0.04162073	-0.03780985	-0.01185894	-0.08502102	-0.089328766	-0.018699646
"1387_at"	0.2558546	0.15095043	-0.006833077	0.14922714	0.28934336	0.07093334	-0.2577238
"1388_g_at"	-0.3631873	0.7341552	-0.20997429	1.7104611	-0.19823837	-0.5206504	0.19540215
"1389_at"	6.16E-04	0.10899353	-0.017453194	0.0752697	0.038474083	-0.07430649	-0.0284729
"138_at"	0.091557026	0.11440134	0.040834904	-0.07551718	0.057027817	-0.005079746	-0.13533115
"1390_s_at"	0.075012684	0.19833183	0.1458292	-1.00E-05	-0.022963047	0.1199193	-0.08487034
"1391_s_at"	-0.06384134	0.20733929	-0.21837902	0.002563	0.039577484	-0.04235792	0.004133225
"1392_at"	-0.081152916	-0.008003235	-0.15653706	0.008568764	0.021025658	-0.12783623	-0.15987587
"1393_at"	0.07503271	0.21249056	-0.019888878	-0.15121984	-0.062508106	-0.09286022	0.023106098
"1394_at"	-0.053038597	-0.3283596	-0.26993465	-0.00927639	0.02021408	0.007831574	0.3415432
"1395_at"	0.48345375	0.051228523	-0.002575874	-0.116648674	0.07556915	0.19342804	0.08547878
"1396_at"	-0.47808647	-0.1756835	-2.0919433	-1.6796088	2.4079442	1.3756099	2.2518144
"1397_at"	0.40461063	0.14317322	0.3086667	0.3335848	0.2556138	0.25759363	-0.11462498
"1398_g_at"	0.08255482	0.2307682	0.09060669	0.06794071	0.017074585	0.05144024	-0.024817467
"1399_at"	-0.5670757	-0.29097748	-0.42402458	0.10286999	0.2561245	0.059123993	0.07127857
"139_at"	-0.032596588	-0.08647585	-0.167737	0.011941433	-0.17702532	0.09434509	-0.21840572
"1400_at"	0.001927853	-0.006293774	0.12163925	0.08192539	0.14515066	-0.08870363	-0.09710169
"1401_g_at"	0.2395935	0.06630945	0.35606718	-0.0803051	0.16819763	0.3452387	0.001929283
"1402_at"	-0.21782494	-0.11268234	-0.45938206	-0.15065002	0.14037418	0.052056313	0.21444988
"1403_s_at"	0.29446507	0.003896713	-0.3447795	-0.18307257	-0.025641441	-0.2060833	-0.05437708
"1404_r_at"	0.38879824	0.19029737	0.008168936	-0.1295526	0.029602766	-0.008168697	-0.03169179
"1405_i_at"	0.36315107	0.22848034	-0.027463436	-0.120645046	-0.17058706	0.1045022	-0.050171852
"1406_at"	0.08305597	-0.02238512	0.11029291	0.040815353	-0.22216606	-0.35739088	-0.02944088
"1407_g_at"	0.03894663	-0.028980732	-0.007981777	-0.021456718	0.007981777	-0.09225464	-0.019880772
"1408_at"	-0.023034573	0.1474514	0.09535694	0.10234547	0.011760235	-0.13999414	-0.0238266
"1409_at"	-0.049241066	0.3272543	0.3345375	0.01022625	-0.01022625	-0.07183695	0.09645271
"140_s_at"	-0.46751165	-0.7637744	-0.23098087	0.015046597	0.08027649	-0.019143105	0.2292571
"1410_at"	0.003466606	-0.031598568	-0.14999199	0.8793316	-0.1939516	-0.5240679	-0.003466606
"1411_at"	-0.15817833	-0.1653328	0.031133652	0.29662323	0.0810771	-0.2419033	-0.21126413
"1412_g_at"	0.0381155	0.32757568	0.121748924	-0.08403969	-0.25465775	0.2423563	-0.13739347
"1413_at"	0.015320778	-0.008963108	0.008963108	-0.02267456	-0.15267944	0.10263586	0.06758666
"1414_at"	0.022103786	0.60952806	0.43609858	-0.023360252	0.19414377	0.50803137	-0.022103786
"1415_at"	-0.10739899	0.27926254	0.21597862	0.25349712	0.045280457	-0.27888298	-0.15676498
"1416_g_at"	0.25968456	0.15625763	0.25817537	0.30130816	-0.013518333	-0.23929214	-0.15870714
"1417_at"	0.112841606	-0.058618307	0.06983304	0.07066131	0.25550556	-0.068734646	-0.013656855
"1418_at"	0.04299116	0.33914185	0.06666899	0.17944574	0.07907581	-0.018219471	-0.17779922
"1419_g_at"	-0.023127556	0.18407631	0.007976055	0.07975483	0.03777504	-0.0947485	-0.148355
"141_s_at"	-8.04E-04	0.18963861	0.12233353	0.18141317	8.04E-04	0.104112625	-0.111729145
"1420_s_at"	-0.08890247	-0.34195518	-0.015565872	0.021844864	0.001336098	-0.024661064	-0.001336098
"1421_at"	-0.02153182	0.18364716	0.14686012	-0.04359317	-0.024431944	0.025220871	-0.18250656
"1422_g_at"	0.2246108	0.081924915	0.5724287	0.033918858	-0.068929195	0.18711615	-0.11303425
"1423_at"	-0.107728004	-0.12294626	0.010118008	-0.10371351	-0.1951356	-0.20697403	-0.010118008
"1424_s_at"	0.53967476	-0.21523571	-0.19522953	-0.032313347	-0.2809906	0.31523037	0.02671814
"1425_at"	0.07635355	0.08326149	0.20344591	0.1685133	0.03976679	-0.04139614	-0.104059696
"1426_at"	-0.001175404	0.06889677	-0.37558794	-0.009080887	0.00117588	-0.27482986	0.016984463
"1427_g_at"	-0.025536537	0.2642522	0.09529734	-0.028983116	0.01544857	0.15732002	0.11151123
"1428_at"	0.24018335	0.020902634	0.089178085	0.32584572	-0.20065641	-0.6158285	-0.020902634
"142_at"	-0.1612935	0.04578924	-0.0450778	0.16562128	0.2596135	-0.18023539	-0.16869926
"1430_at"	-0.022665024	0.031763554	-0.035877705	0.10195351	-0.078289986	0.19010353	-0.15290213
"1431_at"	0.004869461	-0.054417133	-0.21583271	-0.005393505	0.013834953	0.117558956	-0.115808964
"1432_s_at"	0.034496307	0.04406452	-0.002058983	0.12269974	0.098965645	0.30202198	-0.051921844
"1433_g_at"	0.30564976	0.17446566	-0.020305157	-0.32468462	0.12311363	-0.07009649	-0.13942909
"1434_at"	-0.13024282	-0.05226612	-0.11419201	0.001228333	0.13848972	-0.062088966	0.011285782
"1435_f_at"	0.023918629	0.19367886	0.201509	0.11696339	0.08714008	-0.102945805	-0.08127594
"1436_at"	0.294147	0.15028572	0.21225739	0.014576435	0.17412853	0.12368202	-0.08312559
"1437_at"	0.08216286	0.21330452	-0.2505932	-0.11152172	-0.03963709	0.3219099	-0.089150906
"1438_at"	0.09207916	0.18563557	0.28267717	0.01769495	-0.05420351	-0.04968071	-0.023254395
"1439_s_at"	-0.040991306	0.005303383	-0.005303383	0.020923138	-0.41723776	-0.5708027	0.11153221
"143_s_at"	0.14237499	0.27742672	0.07897282	-0.043174267	0.014010906	0.05628681	-0.22905588
"1440_s_at"	0.107028484	-0.16337585	-0.38736153	-0.02416277	-0.007191658	0.019304752	-0.2090869
"1441_s_at"	0.052461624	0.49242616	-0.024323463	-0.037260056	0.18792367	-0.06649971	0.007138729
"1442_at"	-0.09403086	-0.08325338	-0.1289444	0.0594697	0.005776882	-0.05076933	-0.032164097
"1443_at"	0.21579933	0.35149574	0.23493338	0.071967125	-0.0770421	0.025242329	-0.21427393
"1444_at"	-0.023377419	-0.090854645	-0.111558914	0.042892456	0.040655136	0.06466675	-0.03480959
"1445_at"	-0.013813496	0.25059605	-0.16801071	-0.099665165	-0.12317276	0.10499525	-0.09440088
"1446_at"	-0.659605	0.31465292	-0.22733355	-0.19950199	0.021437645	-0.11249828	0.0373168
"1447_at"	-0.28755474	-0.07647896	0.22638702	-0.34225464	0.07236004	0.06115055	0.115021706
"1448_at"	-0.26049948	-5.82E-04	-0.38377	0.11053419	0.29024172	-0.15330839	5.82E-04
"1449_at"	-0.031172276	0.055144787	-0.24752378	0.029430866	-0.18001127	-0.2736559	-0.03410673
"144_at"	-0.11038923	0.011419773	-0.12538624	0.12159395	-0.087949276	0.057112217	-0.08785486
"1450_g_at"	-0.047062874	0.058151245	-0.273983	-0.093642235	-0.032814026	0.10712099	0.03281355
"1451_s_at"	0.51786804	2.4672127	-0.29855108	-0.41621304	-0.06949377	0.19133854	-0.48465014
"1452_at"	-0.56923103	-0.35974932	-0.7878804	-0.3279066	0.20458794	0.49782133	0.65976
"1453_at"	-0.47617579	-0.3573432	0.22140408	0.06038618	-0.094703674	-0.08869314	0.110767365
"1454_at"	0.16633034	0.041424274	-0.14588118	-0.19030094	0.12283754	-0.12389517	-0.19026327
"1455_f_at"	-0.081465244	0.06306076	-0.11990738	0.08471489	-0.056308746	0.12861633	-0.112345695
"1456_s_at"	0.5525737	0.18804932	-0.09338188	-0.3253832	-0.003591538	0.041913986	-0.09037447
"1457_at"	-0.005065441	-0.14728498	-0.24288368	0.07280302	-0.29204273	-0.2665515	0.005065441
"1458_at"	-0.09844732	0.13733864	-0.13588095	-0.07337284	0.21664524	-0.14928532	-0.026351452
"1459_at"	-0.118434906	0.17788887	-0.098489285	0.34520674	-0.08635998	-0.2898264	-0.042562485
"145_s_at"	0.13022327	0.16164398	-0.04409218	0.076434135	0.02772665	-0.047680378	-0.10018921
"1460_g_at"	-0.44625378	-0.1677289	-0.17520809	-0.10811472	0.004603386	-0.168396	0.26192093
"1461_at"	-0.5645428	0.2939787	-1.0909405	-0.4601431	0.6528721	-0.090289116	1.0285463
"1462_s_at"	0.071219444	-0.10936308	0.3307953	0.1634202	0.09992647	0.0522604	-0.20017052
"1463_at"	0.13408518	-0.34132624	-0.53857136	-0.114973545	-0.08511448	-0.42940807	0.20254707
"1464_at"	0.19826221	0.3390813	0.3089323	0.008246422	-0.009239674	-0.059577942	-0.16965675
"1465_s_at"	0.02385068	0.08285546	-0.067343235	-0.03357649	0.066577435	-0.09045458	-0.07638526
"1466_s_at"	0.16083384	0.083188534	0.052894115	-0.041765213	0.16023684	0.14231777	-0.28322172
"1467_at"	0.7604704	-0.2810583	-0.4909706	0.016531944	-0.26433802	-0.12011099	0.069784164
"1468_at"	0.14084625	0.20010471	0.19635487	-0.22434139	0.006620884	0.16885948	-0.27612638
"1469_at"	-0.09929657	-0.031205177	0.045186996	-0.006138802	-0.1173296	0.020721436	-0.07987785
"146_at"	0.03098154	-0.26297665	0.13255405	-0.014516354	-0.0401783	-0.15867949	0.024237156
"1470_at"	-0.2675686	0.03115654	-0.03115654	0.20858097	-0.035413742	0.31389618	-0.11030388
"1471_at"	0.12477064	0.3321767	0.18186045	-0.026886463	0.019860744	0.21042204	-0.11478996
"1472_g_at"	0.14410925	0.15494204	-0.21005917	-0.011452675	0.08745527	0.12592888	-0.11301088
"1473_s_at"	-0.010211468	0.15079093	0.27156806	0.110182285	-0.045461655	-0.08888149	1.80E-04
"1474_s_at"	0.091629505	-0.15429616	0.08064175	0.14472198	0.09317112	-0.07908559	-8.73E-04
"1475_s_at"	0.10340071	0.009046078	0.035542488	0.16444016	-0.021962166	-1.15E-04	-0.20728397
"1476_s_at"	0.074510574	0.09419584	-0.074344635	-0.03690958	-0.20726347	-0.2419815	-0.1252265
"1477_s_at"	-0.07575989	0.020051003	0.2526827	0.3932848	-0.10110235	-0.34894848	-0.020050526
"1478_at"	0.09128952	-0.34792185	0.039874315	-0.060192347	-0.06898713	-0.25033092	0.028975725
"1479_g_at"	0.021903515	-0.058315754	-0.061012268	0.03644991	-0.20706582	-0.06968069	0.00135231
"147_at"	-0.12598944	-0.3053999	-0.2590232	0.04789877	-0.14578533	0.07404804	0.15215778
"1480_at"	0.17878771	0.69907475	0.09215164	0.003334522	-0.19438934	-0.2920928	0.16875172
"1481_at"	-0.017254114	-0.08363104	0.026324749	0.051337242	-0.12097788	-0.11831546	0.027669907
"1482_g_at"	0.027550697	0.11774063	-0.09488344	0.26164913	-0.087170124	-0.1643343	-0.031407833
"1483_at"	-0.13858747	0.096613884	-0.061384678	0.03307247	0.31497765	-0.012290001	-0.026444435
"1484_at"	0.10080671	0.3089924	0.034465313	0.095155716	0.03043747	-7.87E-05	-0.08091164
"1485_at"	0.0829258	0.017309189	0.23998213	0.037746668	-0.017309189	0.054965973	-0.04743266
"1486_at"	-0.22049904	-0.10474396	0.3438816	0.3021183	-0.07890034	0.13507462	-0.06348705
"1487_at"	0.16841507	0.23751163	-0.05427599	0.10028458	0.07140446	0.032687187	-0.043251514
"1488_at"	-0.70880556	1.1245155	1.0602856	-0.7076187	-0.41073418	0.2249937	-0.064816475
"1489_s_at"	0.3518877	0.12025547	0.64293957	0.023981571	0.002608299	0.3059845	-0.050331116
"148_at"	0.1957798	0.058743	0.018039227	0.022026539	-0.16754007	-0.14341068	-0.08228588
"1490_at"	-0.09472418	0.11030626	-0.027231216	-0.004672527	0.007498264	-0.028580189	-0.02139616
"1491_at"	-0.26433253	0.4243083	0.05461669	-0.2922964	0.62794256	0.09769249	-0.051363945
"1492_f_at"	0.056360245	0.0612998	0.17362452	0.11454773	0.006919384	-0.17738342	-0.20955038
"1493_r_at"	0.5327692	0.69899654	0.83460903	-0.021546364	0.26651096	0.8234434	0.021546364
"1494_f_at"	0.13511848	0.2150402	0.006543636	0.18301916	-0.24085665	-0.23640156	-0.16821337
"1495_at"	-0.04401779	-0.40918493	0.60046434	-0.20165396	-0.2032299	0.04401779	0.13126278
"1496_at"	-0.28861666	0.16254139	0.70287275	0.07750893	-0.23946428	0.1837802	-0.016084671
"1497_at"	0.38551998	-0.025532722	0.14074564	0.3618121	0.2226162	0.007250786	-0.115448475
"1498_at"	0.17445612	0.09632015	0.003857613	0.24743986	0.16275358	-0.1301713	-0.2632408
"1499_at"	-0.31898975	-0.35684776	-0.301816	0.3528452	0.19530106	0.10629368	0.030992508
"149_at"	-0.32018423	2.1131043	0.5198927	-0.048233032	0.2349348	0.017563343	-0.13394785
"1500_at"	0.13060284	0.40243626	0.38651896	-8.65E-04	-0.022938728	-0.122765064	-0.2525673
"1501_at"	-0.013372421	0.015811443	0.20992804	0.9329605	-0.29467964	-0.12744665	-0.2478118
"1503_at"	-0.034380436	0.035998344	-0.13975716	0.034380436	0.13539648	-0.2647965	-0.06306648
"1504_s_at"	0.23817873	0.15743828	0.17163277	-0.011845589	-0.015758991	-0.011769295	-0.12852621
"1505_at"	0.15544033	0.07884836	-0.042493343	0.09348059	-0.033859253	0.033859253	-0.042211056
"1506_at"	0.39306736	0.12822151	-0.08162403	0.063195705	-0.22050285	-0.146873	-0.00646019
"1507_s_at"	-0.003508091	0.24646235	-0.39062977	0.7153568	-0.2873001	-0.21317005	-0.33035898
"1508_at"	0.033729076	-0.10654545	0.06888962	0.12037945	-0.029904366	0.029904366	-0.25826168
"1509_at"	-0.05389023	-0.045222282	0.052885056	0.10835934	-0.123921394	0.011211872	-0.011211872
"150_at"	0.24458647	0.053544044	-0.0379138	-0.03226185	-0.002548695	0.011030197	-0.25903463
"1510_g_at"	0.18301821	0.18318081	0.17143106	-0.00859499	0.094911575	0.12961435	-0.050374508
"1511_at"	0.00482893	0.4046998	0.5832038	0.08626747	0.028000832	-0.01570654	-0.112792015
"1512_at"	-0.25364494	-0.8006902	-0.8185973	-0.17845535	-6.91E-04	0.013329983	0.50890493
"1513_at"	0.1738863	0.16665173	0.23692608	0.15768623	0.004563332	-0.18694973	-0.28800106
"1514_g_at"	-0.002644062	-0.030675888	0.24120188	-0.044235706	-0.18610096	0.002644062	-0.094156265
"1515_at"	-0.12134552	0.86641026	-0.111181736	0.12144613	-0.06517792	-0.14406681	-0.09883404
"1516_g_at"	-0.012226105	1.1383018	-0.7142935	0.012225628	0.047183514	0.09355068	-0.13816214
"1517_at"	-0.12300253	0.029111385	-0.23651457	-0.06483078	0.022934437	0.049093723	-0.013229847
"1518_at"	0.010579586	0.05565405	-0.19182634	-0.007738113	0.07617903	-0.021571636	-0.20591307
"1519_at"	0.3685608	0.30543804	-0.48220348	0.059123516	-0.29195833	-0.8258896	0.10984135
"151_s_at"	0.14464188	-0.35062885	-0.10801697	-0.53851604	-0.07312775	-0.15865898	0.2942505
"1520_s_at"	0.015172482	-0.009065151	0.009065628	-0.040028572	-0.13362837	-0.13749123	0.12819672
"1521_at"	-0.47614336	-0.057254314	0.14066982	-0.20953703	-0.12152004	0.108902454	0.20153761
"1522_at"	0.16290855	0.18476677	0.26508236	0.08573151	0.006828785	0.26454544	-0.1063447
"1523_g_at"	0.012892723	0.08095932	-0.08448744	0.12902069	0.039030075	-0.012892246	-0.09893131
"1524_at"	-0.07485485	0.045878887	0.001490116	0.0481143	-0.16939735	-0.09250307	-0.1345644
"1525_s_at"	0.29333353	0.1791153	0.095401764	-0.082965374	0.14025307	0.19483757	-0.13464355
"1526_i_at"	0.15624714	0.07945776	-0.19112062	0.045923233	-0.045923233	-0.053568363	-0.061384678
"1527_s_at"	-0.66999817	-0.73370075	-0.07112312	-0.073372364	1.0663757	0.6124759	1.3456802
"1528_at"	0.2240262	0.27026033	0.04919672	-0.014979839	0.25321913	0.063830376	-0.06839132
"1529_at"	-0.05463934	-0.33742428	0.12089348	0.36492682	-0.33085585	-0.005434036	-0.055633068
"152_f_at"	0.26598787	0.18481588	-0.12264156	0.058412552	0.003279686	0.1924901	-0.14964914
"1530_g_at"	-0.2001791	-1.6088188	0.016863346	0.6386061	-0.48821878	0.10505247	0.14477634
"1531_at"	-0.25989103	-0.15072203	-0.28745317	-0.18490887	0.06817198	-0.25478172	0.05602169
"1532_g_at"	-0.1536746	-0.532465	-0.05081892	-0.08194685	0.28054476	-0.20962763	0.27709007
"1533_at"	-0.18199253	0.2794509	-0.14030886	-0.026381016	-0.030701637	-0.17172575	-0.19432831
"1534_at"	-0.014468193	0.016093016	0.12267828	-0.22432494	-0.03437853	0.06329346	-0.010966301
"1535_at"	0.003746033	0.2826538	-0.1741724	0.16254663	0.009084702	-0.0876441	0.04016304
"1536_at"	0.030197859	0.3825009	-0.07119107	-0.0996418	-0.06641245	-0.1416142	-0.030197859
"1537_at"	-0.16613722	-0.12043619	-0.007810593	0.029649734	0.116368294	-0.10766888	0.007810593
"1538_s_at"	0.1101861	-0.038257122	-0.051337957	0.06451607	-0.24418688	0.26960874	-0.15198016
"1539_at"	0.208879	-0.013322353	0.1498208	0.060245037	-0.22546816	0.039711952	-0.1409235
"153_f_at"	-0.005027294	0.045514584	0.74885464	-0.05790615	0.21378613	0.114359856	-0.027948856
"1540_f_at"	0.13862991	0.2829218	-0.023096085	-0.15372467	0.26210165	0.06093788	-0.057154655
"1541_f_at"	-0.031047344	0.10804176	-0.014734268	-0.0705204	0.014734268	-0.22173691	-0.05449581
"1542_at"	-0.026128292	0.054823875	0.27612352	0.004052162	0.31354046	0.016942501	-0.09287453
"1543_at"	0.15450382	0.124509335	0.014453411	-0.0754199	-0.063396454	0.13508034	-0.3826995
"1544_at"	0.008340359	-0.122590065	-0.22998714	-0.008340359	0.4010167	0.25851917	0.48670435
"1545_g_at"	0.14775777	0.1496079	-0.13035703	0.07172704	0.24876213	-0.058566332	-0.09640193
"1546_at"	0.2405715	0.004603386	-0.007776976	0.17911673	0.2060914	-0.004603148	-0.20554996
"1547_at"	-0.14215946	0.106264114	-0.010321617	-0.002936363	0.09064388	0.41940212	-0.05120945
"1548_s_at"	0.23029995	0.033730984	0.20016336	-0.07590246	-0.13958073	0.19213104	0.102256775
"1549_s_at"	-0.060990334	0.09720564	-0.2082696	0.042598724	0.07680893	-0.05513525	-0.14244127
"154_at"	-0.19195843	0.044922113	0.18036056	-0.22598457	-0.1578896	-0.013693333	-0.04735446
"1550_at"	0.008272171	-0.19196558	0.038478374	0.1413045	-0.008272171	0.25085258	-0.16093063
"1551_g_at"	0.13466644	0.08252525	-0.02396202	0.13179016	-0.009960175	0.36188412	-0.035346985
"1552_i_at"	0.015079975	-0.009482861	-0.17097569	0.14344311	-0.20238924	-0.27947092	-0.22205496
"1553_r_at"	0.57511806	0.52405643	0.79700375	0.045510292	0.20815277	0.6079321	-0.045510292
"1554_f_at"	0.02263546	0.20165873	-0.01123476	-5.15E-04	0.033111095	-0.17936563	5.15E-04
"1555_f_at"	0.24146748	0.16282463	0.28949976	0.14115715	-0.057949543	-0.031107426	-0.11714935
"1556_at"	-0.10485697	-0.531322	0.046640396	0.616982	-0.028483868	-0.022388935	-0.23621225
"1557_at"	0.10212755	0.013337135	0.12598085	-0.025325775	-0.20996618	0.023478031	-0.09228802
"1558_g_at"	0.048440456	-0.39318514	-0.17108583	-0.18754339	-0.090381145	-0.09493828	0.29324484
"1559_at"	0.41314554	0.32740068	0.5884137	-0.004235745	0.16878653	0.3528719	-0.08846569
"155_s_at"	-0.036797523	-0.7094455	-0.50147057	-0.0729146	0.044839382	0.064939976	0.37776327
"1560_g_at"	0.30879354	0.07608175	-0.1383233	-0.007037163	-0.037672043	-0.27729797	-0.13270521
"1561_at"	0.1510377	0.11561489	0.21228313	0.35523653	-0.18840933	0.05152893	-0.31447887
"1562_g_at"	0.30378246	-0.19397116	-0.27263403	0.989398	-0.10139847	-0.10745764	-0.10179186
"1563_s_at"	0.54110336	0.026114464	-0.29051018	-0.2711444	0.3343258	-0.18295479	0.38494968
"1564_at"	0.048978806	0.028970718	-0.047067642	0.13559437	-0.18764973	-0.35040855	-0.028970718
"1565_s_at"	0.39522934	-0.2535634	-0.06744623	-0.026051998	-0.20288086	-0.13088894	0.05306959
"1566_at"	-0.07560253	0.3476143	0.113342285	0.11537123	-0.022511482	-0.19195223	-0.24044657
"1567_at"	7.21E-04	-0.058875084	-0.13358831	-0.04903221	-0.04011011	-0.218009	0.018210888
"1568_s_at"	-0.05000496	-0.16683316	0.15354109	0.27800035	-0.014579773	-0.061721325	0.13181496
"1569_r_at"	0.25331163	0.4984131	0.40495872	-0.05299759	0.2942357	0.5582824	-0.18358374
"156_s_at"	-0.32572985	0.25207186	-0.19077969	0.71510696	-0.30961847	-0.19625568	-0.07296848
"1570_f_at"	-0.07459164	0.019241333	-0.013259649	0.06982732	0.005720377	0.066085815	-0.10916376
"1571_f_at"	0.3119812	-0.25406337	0.080622435	0.32102346	-0.15937304	-0.27044225	0.30565596
"1572_s_at"	-0.10597324	0.17473936	-0.117136955	0.33448744	0.104949	0.4600048	-0.23253632
"1573_at"	0.08787298	0.14263678	0.08153105	0.1299491	0.08097315	-0.14739656	-0.084640026
"1574_s_at"	-0.07180452	0.022613525	-0.08920717	0.11582565	0.057720184	0.008556843	-0.014099598
"1575_at"	0.14798832	-0.33021164	-0.35481262	0.19101048	-0.5095563	-0.021565914	-0.18439484
"1576_g_at"	0.1009078	-0.04360628	0.14686012	0.52286625	-0.008351803	0.008351803	-0.13252783
"1577_at"	-0.12002182	-0.100860596	-0.010005951	-0.006028652	0.009214878	-0.093259335	0.27172565
"1578_g_at"	0.033945084	0.028470993	-0.05547285	0.006994247	0.029038906	-0.105676174	0.06805515
"1579_at"	0.091563225	0.02005434	0.05191803	-0.04098177	-0.015748978	0.060668945	-0.020438194
"157_at"	0.28003454	0.50834084	0.39822435	0.07066774	0.24396324	0.4272976	-0.16849709
"1580_f_at"	-0.01956892	0.31825447	-0.048871994	-1.83E-04	0.06996679	-0.02695322	-0.055980206
"1581_s_at"	-0.002475977	-0.083007574	0.20783615	0.029959202	-0.3213749	-0.19657946	0.051229477
"1582_at"	-0.09115839	0.33325148	-0.061303616	-0.0282588	0.028258324	-0.21820211	-0.054555416
"1583_at"	-0.004896641	0.15028572	-0.21499538	0.07377958	0.1650095	-0.1566081	0.0823884
"1584_at"	0.046738148	0.19150877	0.025911808	0.04456711	0.1768794	0.17853022	-0.11071634
"1585_at"	-0.017532587	0.3259809	-0.117351055	-0.02601552	0.257406	0.02300477	0.24352527
"1586_at"	0.04602909	-0.098730564	-0.1928339	-0.31054306	0.93658257	0.34051228	0.6551876
"1587_at"	0.124362946	0.06777477	-0.051199913	0.019795418	0.15452766	-0.031031609	-0.11852074
"1588_at"	0.12099123	0.23830271	0.07907963	-0.06489706	-0.073071	-0.039360523	-0.029754639
"1589_s_at"	0.08416176	-0.077744484	0.22233295	0.1811676	-0.19691277	-0.48707008	-0.008042812
"158_at"	-0.07536268	-0.051038265	0.28173828	0.021611214	-0.27701855	-0.14813185	-0.029548645
"1590_s_at"	0.13041353	0.06620312	-0.051246166	0.06289196	0.066957	0.42250538	-0.004026413
"1591_s_at"	-0.10695934	0.0664835	-0.01578188	-0.011833191	0.34703684	-0.0307827	0.5159302
"1592_at"	-0.038665295	0.30636978	0.0457325	0.052693844	-0.003347874	-0.007425308	0.003347397
"1593_at"	0.13378191	0.13871837	-0.2668054	-0.1331904	-0.07446599	-0.002552509	-0.06761789
"1594_at"	-0.41997623	0.08164549	-0.11942911	-0.25991058	-0.009028912	0.09376764	0.027172565
"1595_at"	0.041083336	-0.07551241	-0.08198023	0.017453194	-0.006749153	-0.1369009	-0.05937624
"1596_g_at"	0.20325232	-0.3962922	-0.56851816	0.3464613	-0.006454945	-0.27736187	0.29548597
"1597_at"	0.1494112	0.058674812	-0.08479071	0.2894907	0.05485344	0.023937225	-0.4089079
"1598_g_at"	0.04282856	0.051068306	-0.26436138	0.14301491	0.22769737	0.069480896	-0.13270092
"1599_at"	-0.16842699	0.5294876	-0.18042183	-0.15771008	-0.06328201	0.032000065	-0.013567448
"159_at"	0.17953157	0.039995193	-0.11728954	-0.026216507	-0.15134954	-0.02871561	-0.16573763
"160020_at"	0.006793022	0.30944824	-0.031855583	0.060108185	0.001942635	0.010835648	-0.001942635
"160021_r_at"	-0.03292036	0.26322722	0.4217744	-0.098745346	0.14776182	0.1732359	0.00486517
"160022_at"	0.030103683	-0.15651369	0.29812002	0.101110935	-0.017294884	-0.10612583	0.04879713
"160023_at"	-0.003590584	0.11533117	-0.10683775	-0.07003498	0.09528208	0.036307335	-0.1418457
"160024_at"	0.21123314	0.2717538	0.03151703	0.36605072	-0.031517506	0.18288279	-0.218359
"160025_at"	0.080981255	-0.33700752	0.305614	-0.150311	-0.01979208	-0.5061226	-0.17539167
"160026_at"	0.037884235	0.07555485	0.36567402	0.07887888	0.07657719	-0.043560028	-0.24022055
"160027_s_at"	0.17142677	0.056386948	0.111691	-0.24603319	-0.2511263	-0.23285532	-0.3530197
"160028_s_at"	-0.04135084	0.09804726	-0.0696578	0.17273808	-0.013131619	0.004320145	-0.03961134
"160029_at"	0.034271717	0.1655345	-0.034849644	0.041924953	0.029591084	0.025634766	-0.2650752
"160030_at"	-0.34586334	-0.17365551	0.018235683	-0.010970593	-0.16587543	0.28368425	0.067714214
"160031_at"	0.15586233	0.09689331	0.07702494	0.01946783	0.26630545	0.23216057	-0.01946783
"160032_at"	0.04921007	0.1192112	-0.041527748	-0.053374767	0.1273179	0.23139095	0.043892384
"160033_s_at"	0.13019037	0.15933704	0.25386906	0.24848032	-0.3584218	-0.001204968	-0.06918335
"160034_s_at"	0.22707176	0.1115675	0.17934561	0.11826944	-0.033806324	0.005773068	-0.32098103
"160035_at"	-0.15111446	0.07867336	-0.17273855	0.092031	-0.0582695	0.14770842	-0.26059008
"160036_at"	-6.91E-05	0.041461468	0.5248995	0.10056543	-0.058974743	0.17238188	-0.022640705
"160037_at"	0.33058262	0.011506081	0.003812313	0.4138775	0.00353241	-0.09271002	-0.15867853
"160038_s_at"	0.1690073	0.11419201	0.16831493	0.002815723	0.15266562	0.2155819	-0.2526803
"160039_at"	0.004589081	0.13382912	0.023244381	-0.08272743	0.0220685	0.32187176	-0.10063887
"160040_at"	-0.19592857	0.11166859	0.03518772	-0.015868187	0.3683238	-0.07920122	0.076505184
"160041_at"	0.03570652	0.09658337	0.19602537	0.060976982	-0.078745365	-0.09451246	-0.29536295
"160042_s_at"	-0.14071131	0.02774334	-0.004446983	0.014667034	-0.048684597	0.045764446	-0.06746006
"160043_at"	6.95E-04	0.15507817	0.08273864	0.005986452	-0.1813004	0.18668771	-0.12458658
"160044_g_at"	0.29139042	-0.005429745	0.005429745	0.3056612	-0.2480545	0.1653595	-0.16958809
"1600_at"	-0.16078758	0.042560577	-0.36320925	-0.06509256	-0.06877375	-0.2310729	-0.090764046
"1601_s_at"	0.03715229	0.1315651	-0.03015709	0.07938099	0.1380105	0.105918884	-0.017644882
"1602_at"	-0.40971804	-0.3673725	-0.45959616	-0.5402589	-0.001327038	0.42526817	1.6571608
"1603_g_at"	-0.24710798	-0.45565462	-0.28280258	-0.33602095	-0.097980976	0.020200253	0.5736966
"1604_at"	0.20490742	-0.042081833	0.01482439	0.048513412	-0.052315712	-0.01920414	0.04526615
"1605_g_at"	-0.16259003	-0.017607212	0.36879778	0.029785633	0.03057146	-0.08110857	-0.22650146
"1606_at"	0.07039261	0.0748291	0.24364996	-0.006837845	-0.013227463	-0.052548885	-0.20347023
"1607_at"	0.42795658	0.18928814	0.50046396	-0.006762028	0.07566738	0.4233899	-0.32064486
"1608_at"	0.0282197	0.0990181	-0.23633623	-0.12381792	-0.025187016	-0.09525967	-0.08410072
"1609_g_at"	0.03165579	0.23562145	0.40353107	0.2368908	-0.08766079	-0.10522604	-0.04166031
"160_at"	0.07475805	-0.36556435	-0.071974754	-0.07460308	-0.02120924	-0.09407568	0.021209717
"1610_s_at"	0.07046819	0.044812202	-0.20118833	-0.022252083	-0.13045025	-0.16044855	-0.2290349
"1611_s_at"	-0.019251585	0.031424284	-0.15997458	-0.10670233	0.29973698	-0.07393336	-0.06748772
"1612_s_at"	0.61900043	0.38769817	-0.01077652	-0.015817642	-0.2554264	-0.39021397	0.23367691
"1613_s_at"	0.24691439	0.1347909	0.14935923	0.101736546	-0.018010616	0.018310547	-0.12668037
"1614_s_at"	0.1312375	-0.08169031	0.10506487	0.20131922	0.07767248	-0.053458214	-0.23379087
"1615_at"	-3.36E-04	0.12050629	-0.029109478	0.09477043	0.067044735	3.36E-04	-0.30507135
"1616_at"	-0.41954374	0.2540412	1.2772713	0.08097267	-0.7337346	-1.152031	-0.06000805
"1617_at"	-0.09559536	-0.14662409	-0.18295765	0.16755915	-0.09413004	-0.09430885	-1.73E-04
"1618_at"	0.0061028	-0.0061028	0.15212989	0.10858369	0.06292248	-0.1471088	-0.14924169
"1619_g_at"	0.065363884	-0.06426525	-0.23058748	0.02345419	-0.020170212	-0.30607843	-0.11059046
"161_at"	0.17521644	-0.041552067	0.030228615	-0.008552551	0.324049	0.1355617	-0.001405239
"1620_at"	-0.07007456	0.24106169	-0.1417737	0.056231022	-0.1683259	-0.14084435	-0.25101948
"1621_at"	-0.043488026	0.22097445	0.039238453	0.032688618	-0.08089781	-0.3405974	-0.3054068
"1622_at"	0.23422718	-0.12041569	-0.004864693	0.09563446	-0.076841354	0.112026215	-0.13390541
"1623_s_at"	0.002272606	-0.002272606	0.122879505	0.07414389	-0.021000862	-0.03547907	-0.11844182
"1624_at"	0.26863718	-0.2062006	-0.008928299	0.48775387	-0.06923723	-0.27058744	-0.17270422
"1625_at"	0.07386398	0.103728294	-0.17124367	0.07717514	-0.003320694	0.016169548	-0.064311504
"1626_at"	0.031224728	-0.064608574	0.019951344	0.11888361	-0.015145779	-0.1383853	-0.18364859
"1627_at"	-0.01761818	0.03739071	-0.03305912	0.034018517	0.05719471	-0.3852892	0.01761818
"1628_at"	0.15234613	0.19913626	-0.0181489	0.056645393	0.05038309	-0.050849915	-0.23838425
"1629_s_at"	-0.17902279	-0.35642242	-0.54670334	-0.21943474	0.7157645	0.46845245	0.73835325
"162_at"	0.07352352	-0.020656586	0.045347214	-0.07928181	-0.3455534	-0.10277176	0.033400536
"1630_s_at"	0.042706966	0.14891243	0.19801617	-0.016604424	-0.032274723	0.060879707	-0.13069725
"1631_at"	0.16898394	0.25252914	0.24007416	0.2300992	0.3471117	0.004442692	-0.11008453
"1632_at"	-0.16513729	0.076895714	-0.00359869	0.098425865	-0.11580944	-0.20000124	-0.069867134
"1633_g_at"	0.21781445	0.055114746	-0.5574746	-0.18644094	0.12847424	0.1731925	-0.047670364
"1634_s_at"	0.12792826	0.100664616	0.2025404	0.08517313	-0.002942562	0.002942562	-0.25426483
"1635_at"	0.32735634	-0.6411233	0.003375053	0.3149395	-0.12829018	-0.75600815	-0.12211466
"1636_g_at"	0.3620844	0.018446922	0.04866886	0.30064583	-0.101597786	-0.19667244	-0.12061596
"1637_at"	0.07307005	-0.2048502	-0.49548435	-0.13530827	0.31314564	0.50669813	0.23856974
"1638_at"	0.4243741	0.29072142	0.22737694	-0.02207613	0.20150518	0.40739727	0.03190422
"1639_s_at"	0.005729675	-0.009778976	-0.17390108	0.036994457	-0.06474686	-0.34761572	0.005164623
"163_at"	0.4513278	0.22227716	0.3587823	0.23566675	-0.020978928	0.004539967	-0.08038902
"1640_at"	-0.45570993	-0.44774246	-0.1257286	-0.11638403	-0.066124916	0.070705414	0.72548723
"1641_s_at"	0.08807373	0.032614708	-0.30457497	-0.032614708	-0.035298347	-0.16978645	0.12590408
"1642_at"	-0.003933907	0.003933907	0.114702225	0.32144356	0.04776287	-0.10682392	-0.08812809
"1643_g_at"	-0.62828016	-0.016543388	-0.49108982	0.51014376	-0.15155125	-0.26577234	0.39943457
"1644_at"	0.045253754	-0.28394222	0.075624466	-0.030819893	0.35278225	-0.13733292	0.24241447
"1645_at"	0.19067812	0.13175154	0.22221947	0.064917564	-0.07351112	-0.13983345	-0.25809383
"1646_at"	0.13430166	-2.58E-04	-0.09369278	-0.057018757	-0.005899906	0.017228127	-0.1290636
"1647_at"	-0.07554197	-0.11574268	-0.040310383	0.00320816	0.07462978	-0.018216133	0.16381311
"1648_at"	-0.04558897	-0.032034874	-0.06725979	-0.20060468	-0.001935244	0.057093143	-0.07960844
"1649_at"	0.2553606	0.3680277	-0.21931314	0.06899786	0.23278618	-0.057185173	-0.06274319
"164_at"	-0.108315945	0.076681614	-0.14786339	0.053143978	-0.013685226	0.01358366	-0.013584137
"1650_g_at"	0.069755554	0.07853794	-0.1398611	0.051966667	-0.04220009	-0.22080517	-0.13474846
"1651_at"	0.060833454	0.33460522	-0.07485914	0.15144444	-0.06083393	-0.11883068	-0.23163891
"1652_at"	0.105183125	0.08281326	0.018654823	-0.19142675	0.019833565	0.029407501	-0.04615879
"1653_at"	-0.3567648	-0.5866575	0.020672798	0.22259903	0.26428318	-0.18357944	0.044384956
"1654_at"	-0.18289566	0.1089468	-0.20694685	-0.07525349	-0.17249775	-0.28989363	0.08141756
"1655_s_at"	0.09823418	-0.004270554	-0.09682584	0.013813019	0.55950594	-0.028198957	-0.039191723
"1656_s_at"	0.13205957	0.26080513	0.12154579	0.15126657	-0.17739439	-0.121545315	-0.17684746
"1657_at"	0.10177326	-0.2640915	-0.037783146	0.060477734	-0.048414707	-0.008317471	-0.18847513
"1658_g_at"	0.22119665	-0.15478802	0.044463634	0.11104441	-0.028768063	-0.16162014	-0.05081272
"1659_s_at"	-0.34984493	-0.6554904	-0.1425147	0.008586884	0.120987415	0.09991312	0.37207985
"165_g_at"	-0.19635773	-0.12754583	-0.044426918	0.035962105	-0.22524166	0.43879318	0.15419102
"1660_at"	-0.21847391	-0.38086796	-0.39673567	0.3238449	-0.08142567	-0.2768712	0.19184732
"1661_i_at"	-0.008593559	3.07E-04	-0.049525738	-3.07E-04	0.10583496	-0.034821987	-0.039652824
"1662_r_at"	-0.20336723	0.021317482	-0.5300102	-0.2616663	-0.16444874	-0.021317482	0.060853004
"1663_at"	0.14977312	0.14408684	0.108151436	0.046973705	0.05868721	0.004863262	-0.17967176
"1664_at"	-0.037384987	0.009307861	-0.060092926	-0.009307861	-0.029426575	-0.0562706	0.13576412
"1665_s_at"	0.4545102	0.20697069	0.38841963	0.15353155	0.04194641	0.033270836	-0.16996956
"1666_at"	0.02261591	-0.20601845	0.12711954	-0.021764755	0.030528545	0.18259478	-0.039413452
"1667_s_at"	0.23093987	0.30316353	0.059583664	0.036895752	0.12135601	0.28629494	-0.00207901
"1668_s_at"	0.17748642	-0.14289331	0.09194088	0.23449183	-0.02444601	-0.18693733	-0.01180315
"1669_at"	-0.089835644	-0.054261684	0.01677227	-0.084160805	0.2138772	-0.18071556	0.027390003
"166_at"	0.07561159	0.18258667	-0.009535313	0.22597933	-0.04125786	-0.007860661	-0.09960222
"1670_at"	0.03841448	-0.002976894	0.1818471	0.2351594	-0.014716625	-0.063696384	-0.21951056
"1671_s_at"	-0.26532936	-0.13339472	-0.06387234	0.09187126	-0.037860394	-0.14409304	0.003921032
"1672_f_at"	0.29486227	0.3562169	0.22214508	0.3372035	-0.26401186	-0.17773867	-0.29918194
"1673_at"	0.04728794	-0.18462849	-0.110613346	0.075899124	-0.030517578	0.06371641	4.13E-04
"1674_at"	-0.31740475	-0.92505026	-0.6699395	-0.53825855	0.18816519	-0.008324146	0.1661644
"1675_at"	-0.5699744	-0.059319496	-0.64450836	-0.219913	-0.40877342	0.051813602	0.13137531
"1676_s_at"	-0.07555294	-0.37362194	-0.5240526	0.07555294	0.18906593	0.1955061	0.23043537
"1677_at"	0.3535576	0.42060614	0.70101833	-0.048614502	0.39367294	0.5031824	0.030133724
"1678_g_at"	0.6733155	-0.08529377	-0.17082071	-0.29614592	0.5451155	0.54506636	0.48571825
"1679_at"	0.15886283	-0.010141373	-0.20843005	-0.16068149	-0.031449556	-0.14410353	-0.19985652
"167_at"	-0.59621906	0.34727573	-0.07397461	0.17907858	-0.0790658	-0.58186626	-0.20214033
"1680_at"	0.14335918	-0.16480494	-0.21902132	-3.86E-04	0.3170576	0.09752369	3.87E-04
"1681_at"	0.0933938	0.15245008	0.17290401	0.06937313	-0.20930958	-0.18239117	-0.111796856
"1682_s_at"	0.020151615	0.07348251	-9.51E-04	0.031043053	-0.19462156	-0.035234928	-0.15389442
"1683_at"	-0.1144886	0.054187775	-0.07636595	-0.01817894	-0.26818275	-0.09802103	0.070608616
"1684_s_at"	0.021337986	0.3257351	0.23956203	0.13914156	-0.1758709	-0.011630535	-0.22520065
"1685_at"	-0.09827852	-0.26803637	0.008805752	-0.013444424	-0.29125452	-0.008805752	0.33184624
"1686_g_at"	-0.063836575	-0.07290888	-0.18648481	-0.2017026	0.06383705	0.11394453	0.17069435
"1687_s_at"	0.16087484	0.26717472	0.07645178	0.020906448	-0.036828995	-0.020905972	-0.053111076
"1688_s_at"	-0.19896173	0.0727005	-0.3690486	0.054941654	-0.15815067	0.04842758	0.10181713
"1689_at"	0.07930708	0.09972811	-0.08465052	0.18513584	-0.00851965	0.17835283	-0.09361458
"168_at"	-0.040052652	-0.06953716	0.007490158	-0.00748992	-0.33023024	-0.007582903	0.18885899
"1690_at"	0.113995075	0.21333551	-0.022811413	-0.010085106	0.014834404	-0.23724556	-0.21735287
"1691_at"	0.11631775	0.04553318	0.2434721	-0.09211111	-0.10232067	-0.13266134	-0.00426054
"1692_s_at"	0.13979149	0.10044861	0.10081148	-0.003731251	0.14061308	0.009151936	0.049035072
"1693_s_at"	0.09767914	0.5737505	-0.05229473	-0.9007225	1.3553629	-0.031728745	0.39366436
"1694_s_at"	0.26715517	0.17757988	0.4470935	0.06478119	-0.007731915	0.21291542	-0.085197926
"1695_at"	-0.32143307	0.3612404	-0.23136139	0.016960144	-0.23122787	0.08148289	-0.016960144
"1696_at"	-0.04407215	-0.002618313	-0.12797928	-0.16149473	-0.266706	0.00261879	0.32485294
"1697_s_at"	-0.2483542	0.14645815	-0.06707239	-0.047850132	0.005465984	0.007865429	-0.11722779
"1698_g_at"	-0.13842154	0.17036676	0.4713006	0.13810396	-0.16529322	0.041225433	-0.20607996
"1699_at"	-0.12697458	0.27939034	0.017766476	-0.0821867	-0.017766476	0.019493103	-0.07346916
"169_at"	0.21145344	0.24394274	0.13056612	-0.03044939	0.030448914	0.045616627	-0.032636166
"1700_at"	0.006380081	0.3279853	-0.18719196	0.033956528	0.115110874	0.13778448	-0.1888237
"1701_at"	-0.03344345	0.14837503	0.2370224	-0.0475626	-0.1190691	0.14002943	-0.028839588
"1702_at"	0.24589872	0.28393555	0.33955002	-0.1874857	-0.17996073	-0.006827354	0.14995718
"1703_g_at"	-0.07452297	0.1242795	-0.050075054	0.004775047	-0.22145271	-0.21670103	-0.04625845
"1704_at"	0.003216744	0.13404083	-0.13178396	-0.06584406	0.015992165	0.04216385	-0.0429554
"1705_s_at"	0.012346268	0.20578337	0.53241825	-0.14121771	0.17767382	0.54181623	-0.001524925
"1706_at"	0.13018894	0.28735352	0.046821594	0.07127571	-0.0744791	0.040058136	-0.012187004
"1707_g_at"	0.08142567	-0.007526398	-0.09583187	0.05734825	0.02303505	-0.09353447	-0.0500412
"1708_at"	-0.33459806	-0.060840607	-0.25748253	0.11387968	-0.26491547	-0.17645216	0.2378974
"1709_g_at"	-0.3137884	0.00415802	-0.5085573	0.07075071	-0.4400854	0.10692835	-0.00415802
"170_at"	0.040069103	0.110835075	0.043276787	-0.004025936	0.119423866	0.045001507	-0.18144941
"1710_s_at"	-0.006040096	0.018749714	0.06261873	0.1756792	-0.22052431	-0.05132866	-0.10450983
"1711_at"	-0.012454033	0.08107185	0.20638943	0.002388954	-0.058517456	-0.002388954	-0.11275387
"1712_s_at"	0.07031059	-0.020065784	-0.27146196	-0.12623739	0.07823038	-0.08377218	0.08325386
"1713_s_at"	0.003543377	0.2949686	-0.15673733	-0.053608894	-0.30594015	0.43734694	0.088037014
"1714_at"	0.01408577	-0.046718597	-0.26061964	0.053350925	0.06672764	-0.0824666	-0.043015957
"1715_at"	0.7757478	-0.018667221	-0.27673006	-0.010400295	0.1539588	-0.10495043	0.010400295
"1716_at"	0.024604797	0.115365505	0.16143227	0.06586838	0.20536041	0.052031994	-0.19841146
"1717_s_at"	0.07793045	-0.16003561	-0.24913216	-0.12877226	0.021060467	-0.029589176	0.24351788
"1718_at"	-0.007499695	-0.4686718	-0.46944237	-0.20997143	-0.17801762	0.06012249	0.16808414
"1719_at"	0.024583817	-0.008067608	0.35160685	-0.051786423	-0.23774004	0.41836786	-0.041030407
"171_at"	0.7776308	-0.79955196	-0.23767805	-0.132164	0.008686066	0.30054808	0.39684677
"1720_at"	0.07122898	0.32398653	0.63983345	-0.013710022	0.21383381	-0.08404541	-0.28787994
"1721_g_at"	0.3394189	0.26616287	0.14383698	-0.14155936	0.10387659	-0.080788136	-0.078296185
"1722_at"	-0.16871929	0.08957386	0.6269884	-0.0408988	0.17542553	0.4902525	-0.11825514
"1723_g_at"	0.21740627	0.3989277	0.3315301	-0.04803562	0.015005589	0.30238247	-0.015005589
"1724_at"	-0.003653526	-0.02616787	-0.02599144	-0.033272266	0.095888615	0.1090579	-0.042258263
"1725_s_at"	-0.26148367	-0.5793433	0.29772186	0.031899452	0.35660315	0.048153877	0.13565731
"1726_at"	-0.092119694	-0.0065732	-0.10303068	0.0065732	0.101373196	-0.30392933	-0.08709192
"1727_at"	-0.17417145	0.1401267	0.115507126	0.004508972	-0.043851376	-4.64E-04	0.040815353
"1728_at"	-0.49365807	-0.4406376	-0.21565723	-0.24916649	0.10414791	0.15380764	0.34089565
"1729_at"	-0.08886194	0.28250742	-0.015272617	0.12720108	0.08034754	0.05561018	-0.059265137
"172_at"	0.055376053	-0.012536526	-0.30180025	-0.04380083	0.0414114	-0.069392204	0.07162523
"1730_s_at"	0.14967632	-0.020973682	0.33429956	0.17278528	-0.095189095	0.07194471	-0.13895178
"1731_at"	-0.044727802	-0.15492678	0.2936387	-0.3877387	0.01995945	-0.22897816	0.17808771
"1732_at"	0.18933439	0.002119064	0.22907352	-0.06607199	-0.077950954	-0.038702965	-0.04200363
"1733_at"	0.11225653	0.04968691	-0.22278595	-0.2629013	0.16623545	0.30451488	0.003517151
"1734_at"	0.13294268	-0.004484654	0.082541466	0.00448513	0.05242634	-0.18330336	-0.05374956
"1735_g_at"	-0.0638423	0.121910095	0.032829285	0.10651493	-0.004293442	0.004292965	-0.038170815
"1736_at"	0.054479122	-0.12074423	-0.35049868	-0.054479122	0.15576124	0.7835617	0.8375664
"1737_s_at"	1.0347128	-0.060515404	-0.27912235	0.51239777	0.50446415	-0.6052003	-0.202981
"1738_at"	-0.031417847	0.13376951	-0.020334244	0.030022621	0.28687048	-0.17932224	-0.051611423
"1739_at"	-0.06727004	0.19372368	-0.060275316	0.006472349	-0.06805587	-0.13235927	-0.11537528
"173_at"	-0.06778669	1.7209454	0.28875732	0.6161499	0.018220425	-0.32808924	-0.24508858
"1740_g_at"	0.10281849	0.38591242	-0.058285713	0.0655961	0.15653276	0.040958405	-0.21145058
"1741_s_at"	0.031249046	0.85961056	0.05321598	-0.17892885	0.6025138	-0.11718702	0.026757717
"1742_at"	0.039946556	0.16462612	-0.16971207	-0.049497604	0.048661232	-0.12792778	-0.003914833
"1743_s_at"	0.033560753	0.050446272	0.30330253	-0.115802765	0.06949377	0.23317313	-0.0611856
"1744_at"	0.22895908	0.15584421	0.49499798	0.1407857	0.03907776	0.056943417	-0.1760273
"1745_at"	-0.28277302	0.18771362	-0.09613323	0.11420965	0.07756472	-0.24119854	0.046826363
"1746_s_at"	-0.04166174	0.07224989	0.43545294	0.5635543	0.118178844	0.04166174	-0.113974094
"1747_at"	0.24233675	0.4513693	-0.08992052	0.005629063	0.18535757	-0.010435581	-0.08711386
"1748_s_at"	0.14068556	0.12416458	0.26560926	0.001756191	0.32333088	0.22214031	-0.15378904
"1749_at"	0.18019056	0.33323002	0.04673004	0.1893053	-0.17094469	-0.13293743	-0.14232779
"174_s_at"	0.08007908	-0.0984602	-0.19735336	-0.24360704	0.48975897	0.5004983	0.34691668
"1750_at"	0.14835548	0.73247147	0.45669365	0.17696857	-0.32579803	-0.03277111	-0.3914976
"1751_g_at"	0.08490276	1.4103727	0.6320486	0.29716396	-0.36922312	-0.029154778	-0.19280529
"1752_at"	-0.008833885	0.010225296	-0.003958702	0.06617546	-0.40201378	-0.088243484	0.042342186
"1753_s_at"	0.11462593	0.6473808	0.7357111	0.27284813	-0.17639351	-0.007500172	-0.19669342
"1754_at"	0.10000467	0.078406334	0.16666174	0.005548954	-0.09803963	0.042036533	-0.018743038
"1755_i_at"	0.06907749	-0.008868218	-0.065775394	0.008868218	0.18071556	-0.0966115	-0.08994341
"1756_f_at"	-0.1368556	0.05599022	0.01860094	-0.15301275	-0.14111948	-0.0658412	-0.12692213
"1757_i_at"	0.08891225	0.024194717	0.059085608	-0.003054619	-0.06967831	0.21451521	-0.105350494
"1758_r_at"	9.73E-04	-0.02747345	0.105765104	-0.003976107	0.18791103	0.1426549	-0.016608953
"1759_f_at"	0.1954217	0.07400465	0.00394249	-0.14046907	-0.035535812	-0.028183937	0.020419598
"175_s_at"	0.2613535	0.9795666	0.20296764	0.38347244	0.010909081	0.23822594	-0.21608925
"1760_s_at"	0.10147619	0.1500721	0.10684252	0.2038722	-0.035007477	-0.15521765	-0.19726706
"1761_at"	-0.1715498	-0.016758919	0.2136488	0.27942944	-0.12858295	0.10369587	-0.27507353
"1762_at"	-0.113889694	0.1111989	-0.009243012	0.006536007	-0.017859459	-0.006536007	-0.19653797
"1763_at"	0.017807007	0.044407845	0.014576435	0.07344484	-0.2168417	-0.100085735	-0.1764574
"1764_s_at"	-0.26404238	0.09554958	0.046707153	0.37755537	-0.56479263	-0.44991064	-0.20797062
"1765_at"	0.10236263	0.051578045	-0.163517	-0.037926197	-0.059218407	-0.24555635	-0.094419956
"1766_g_at"	-0.022271633	0.0385952	-0.043674946	0.021504402	-5.43E-04	-0.16564465	-0.11015129
"1767_s_at"	0.033918858	0.29549217	0.02286148	0.019628525	-0.091826916	-0.19184065	-0.019628525
"1768_s_at"	0.093541145	0.5630989	0.22035694	-0.08492184	-0.14561844	-0.010225296	-0.022065163
"1769_at"	0.23973513	0.14035702	0.41268158	0.1849823	0.045234203	-0.14482307	-0.21961784
"176_at"	-0.45116186	-0.12988424	-0.23658562	0.45570326	-0.53149223	-0.36252165	0.15115166
"1770_at"	0.24723244	0.0238626	0.001459599	-0.033275127	-0.04304242	-0.21995544	-0.13503885
"1771_s_at"	0.39735603	0.2756071	0.117669106	1.0542793	-0.06787586	-0.42695236	-0.5213151
"1772_s_at"	-0.07014465	-0.16469288	-0.072384834	0.37311268	0.08443737	-0.302382	-0.030566692
"1773_at"	-0.08684111	0.200068	0.22357845	0.15995169	-0.04047203	-0.21554899	-0.11060715
"1774_at"	0.0903573	-0.006844521	0.23582745	-0.016271114	0.21994257	0.44547844	-0.057229996
"1775_at"	-0.1711855	0.16818237	-0.124112606	0.07756615	-0.007148266	0.049592018	-0.23200703
"1776_at"	-0.20263672	0.45142984	-0.15690613	0.30583906	0.5257335	-0.044382095	1.8470936
"1777_at"	0.15522099	0.027913094	0.20441437	0.17533779	0.07776737	-0.027913094	-0.102586746
"1778_g_at"	0.25236034	-0.017194271	-6.78E-04	0.7216215	6.79E-04	-0.2557454	0.006821156
"1779_s_at"	-0.00880146	0.1412344	0.008800983	-0.23940086	0.19972515	0.25553322	0.1694169
"177_at"	0.22430515	0.20973253	0.14096355	0.025313854	0.08959198	0.20681953	-0.23428679
"1780_at"	-0.03480196	0.025347233	0.02796793	0.045329094	-0.043706894	-0.13938665	-0.06900215
"1781_at"	0.21686411	-0.09375095	0.053243637	-0.01267767	-0.027853012	-0.16559124	0.01267767
"1782_s_at"	-0.28812122	0.048261166	0.16606903	-0.048261166	-0.24350452	-0.0567317	0.09778023
"1783_at"	-0.001217365	0.102777004	0.13559008	-0.20896006	0.25322866	0.060905933	-0.18351126
"1784_s_at"	-0.31422758	0.02129507	-0.33860445	0.0767746	-0.37766075	-0.35390186	-0.02129507
"1785_at"	-0.3814683	-0.2490449	-0.16512156	0.09905386	-0.098338604	-0.1669631	0.09833813
"1786_at"	0.01342535	-0.1601839	-0.3730359	-0.2859521	0.075708866	-0.44376516	0.26596022
"1787_at"	-0.8510151	0.14359236	-0.8326888	0.08147097	0.59301853	-0.255486	-0.03460455
"1788_s_at"	1.1181545	-0.17741728	-0.22218847	0.46399784	-0.34847546	-0.908144	0.0374403
"1789_at"	-0.6504245	-0.57656145	-0.5564556	0.20311165	0.25501394	-0.08501339	0.31272364
"178_f_at"	-0.1785965	-0.08533049	0.054008007	-0.0932188	-0.24973345	0.017827988	0.09375572
"1790_s_at"	0.11248112	0.21732903	-0.009554863	0.32765007	-0.13079071	-0.057974815	-0.11347103
"1791_s_at"	-0.04115963	-0.17465544	-0.16260791	0.111753464	0.06581187	0.007720947	-0.28723168
"1792_g_at"	0.004779816	-0.007338524	0.059622765	-0.01613617	0.30922604	-0.10825443	0.0220747
"1793_at"	0.029808044	-0.029808044	0.14908695	0.08898592	0.12991476	-0.13608122	-0.37745142
"1794_at"	-0.1463089	0.021751404	0.004482269	-0.23603296	-0.07196379	-0.44321918	-0.004482269
"1795_g_at"	-0.16035938	-0.03926277	0.12373924	0.09513092	-0.013454437	0.011731148	-0.042437553
"1796_s_at"	0.022340775	0.08349514	0.04815674	-4.79E-04	-0.05146599	-0.23902035	5.37E-04
"1797_at"	0.10586786	0.13728428	0.093015194	-0.10014248	-0.02102232	0.07748985	-0.013566494
"1798_at"	-0.48001432	-0.4707017	0.21020794	0.274045	-0.22999239	-0.18385744	0.100245476
"1799_at"	-0.40907764	-0.016121387	-0.097752094	0.15322447	0.088748455	-0.50496244	-0.06516981
"179_at"	0.06969452	0.0994606	0.13076496	0.19805717	-0.055402756	-0.31712437	-0.19289589
"1800_g_at"	0.13893127	0.16632414	0.007504463	0.13934135	-0.12799549	-0.22154903	-0.17590618
"1801_at"	-0.5781207	0.0394063	-0.08687258	-0.43071604	0.23288059	-0.026231766	0.026231766
"1802_s_at"	0.40976572	0.16662502	0.16314316	0.18675232	-0.11339712	0.16421938	-0.123202324
"1803_at"	0.010769844	0.06788683	0.12029743	0.03003025	0.11699343	0.10332394	-0.123609066
"1804_at"	0.109129906	0.25922394	0.041036606	0.075678825	-0.024868965	-0.04114151	-0.16811275
"1805_g_at"	-0.06902552	-0.016181469	0.09721041	0.011694908	0.29361868	0.17329788	-0.011694908
"1806_at"	0.011240482	-0.22081447	0.11973786	-0.22631049	0.12166095	-0.005453348	0.0909431
"1807_g_at"	0.19783735	0.10748339	-0.08413124	-0.10919857	-0.035437584	0.032206535	0.2683797
"1808_s_at"	0.19726658	-0.001282215	0.37467194	0.12603283	0.08187246	0.30612135	-0.04648924
"1809_at"	-0.06206703	0.035204887	-0.23955631	-0.17115736	-0.035204887	-0.13793659	0.22416401
"180_at"	0.5079074	0.11379337	0.13437891	0.051170826	5.61E-04	-0.13720512	-0.071406364
"1810_s_at"	0.2242775	7.62E-04	-0.28619623	-7.62E-04	0.044294834	0.07186127	-0.06545448
"1811_at"	-0.016063213	0.25694036	0.22565174	0.21699047	-0.03539133	-0.09361887	0.072301865
"1812_s_at"	0.20884895	0.27664375	0.010879517	0.17093992	-0.052153587	-0.12647772	-0.056384087
"1813_at"	0.004395485	0.0499506	0.11817026	0.035848618	0.08912611	0.011664867	-0.1004138
"1814_at"	0.44141006	0.013357163	-0.28879595	0.017626286	0.14049578	-0.24208212	-0.23021221
"1815_g_at"	0.3165555	-0.35663128	-0.69102263	0.22396421	0.020236969	-0.14031601	0.12900591
"1816_at"	0.16887379	-0.23400545	0.23885298	-0.068686485	0.13426399	0.16878796	-0.090266705
"1817_at"	-0.71920204	-0.6484909	0.37211323	0.12238598	-0.29298782	0.20092964	0.14280033
"1818_at"	-0.016324997	-0.019861221	0.3090124	0.09430933	-0.28228378	-0.48935986	0.11622524
"1819_at"	-0.014803886	-0.06845808	0.15039158	0.07947636	-0.20916843	-0.13627243	0.014803886
"181_g_at"	0.8707714	-0.001377106	-0.29033852	0.09812641	0.02384758	-0.21103382	0.001377106
"1820_g_at"	0.2544489	-0.002374172	0.02949524	0.022999763	-0.14135742	0.06275225	-0.18896437
"1821_at"	0.08893108	0.18339014	0.042065144	-0.13874769	0.008776188	0.24286652	-0.13860178
"1822_at"	-0.32242584	0.010518551	-0.50049925	0.21066809	-0.2518425	-0.26392698	0.001754284
"1823_g_at"	-0.03938532	0.39218616	0.20180655	0.27081442	0.057943344	-0.14342356	-0.13845348
"1824_s_at"	-0.017131805	0.27753448	0.20653057	-0.0963006	0.017131329	0.06774092	-0.22117758
"1825_at"	-0.19886208	0.63094234	0.022033691	-0.002280235	-0.027245522	-0.056839943	0.2764697
"1826_at"	-0.15094376	0.07376671	0.056102753	0.041243553	0.10190487	-0.3307762	0.18278122
"1827_s_at"	0.23734474	0.14350605	0.30961418	0.14972115	-0.08186531	-0.19150925	-0.16484165
"1828_s_at"	0.004636765	0.26889753	-0.24983358	-0.13314581	0.108240604	0.22214079	-0.004636765
"182_at"	-0.32086468	-0.011987209	0.11645222	-0.25223112	0.40165138	0.011987209	0.23614645
"1830_s_at"	0.29472923	0.25732327	8.10E-04	0.120042324	-0.015091419	-0.0968523	-0.16575527
"1831_at"	-0.1007781	0.08685446	-0.03220892	-0.08078337	0.16314793	0.01888752	-0.014235973
"1832_at"	-0.07172823	-0.23783827	0.10715389	0.13026333	0.06841087	-0.07709837	-0.052412987
"1833_at"	-0.028132439	0.075733185	-0.21676588	-0.0489645	0.18097544	0.2348094	0.15140676
"1834_at"	-0.031149864	-0.13262844	0.07084942	0.13217783	0.017173767	-0.096934795	-0.060370922
"1836_at"	-0.28517342	-0.726161	0.057002068	0.29441166	0.26082134	-0.119277954	0.015119553
"1837_at"	0.19450903	0.03246212	-0.07869768	-0.09620905	-0.0645895	0.2902236	0.3815775
"1838_g_at"	0.03682995	0.017797947	-0.09315395	-0.046581745	-0.024477959	0.08245087	0.0610857
"1839_at"	-0.078393936	-0.35302496	-0.10659027	0.32355595	-0.031889915	-0.36616468	0.07492638
"183_at"	-0.29737902	-0.07214928	-0.018876553	0.16109514	-0.34848118	-0.33157015	0.011006832
"1840_g_at"	0.04092598	-0.31663322	-0.14630795	0.39994526	0.1859932	-0.026994705	-0.08156395
"1841_s_at"	0.20565796	0.42106533	-0.1471157	0.09538221	0.10102081	0.2564869	-0.07684803
"1842_at"	-0.31175327	0.09823036	-0.5884075	-0.12897778	1.1247396	0.28120613	0.054849148
"1843_at"	0.007658005	0.07047844	0.56217	-0.050726414	-0.04609728	-0.007658005	-0.1330533
"1844_s_at"	0.44445562	-0.20405674	-0.007391453	-0.09672165	-0.07145023	-0.20778275	0.1201992
"1845_at"	0.09430313	-0.1002264	-0.051132202	0.11826849	-0.011254311	-0.108406544	0.042181015
"1846_at"	-0.117126465	-0.010099888	-0.290061	-0.4809327	0.18675375	0.43651295	0.25628757
"1847_s_at"	0.07990265	0.19064665	0.13917398	0.0971899	-0.023613453	-0.17445612	-0.18609619
"1848_at"	-0.1812563	-0.7576194	0.1124773	0.16863203	-0.48980188	-0.8000479	0.3487711
"1849_s_at"	-0.045947075	-0.028897285	0.034148216	-0.06977415	-0.13418102	-0.19369173	-0.07916212
"184_at"	-0.003839016	0.11160803	0.059574604	0.05756855	0.078650475	0.14954948	-0.10115099
"1850_at"	-0.17562103	0.13759422	-0.026771545	0.11526966	-0.11587906	-0.046608925	0.0555439
"1851_s_at"	0.3891983	0.006549835	0.1833067	-0.052746296	0.19070673	0.113776684	-0.013250828
"1852_at"	-0.080910206	0.04111004	-0.20103359	-0.03187704	0.03187704	-0.2944312	-0.15271044
"1853_at"	0.08180714	0.13456869	0.3076167	0.14900064	0.086218834	0.024751663	-0.17091608
"1854_at"	0.022376537	0.05846119	0.20648098	0.002490997	0.07499266	0.08427	-0.28952074
"1855_at"	0.06322098	0.111952305	0.0838871	-0.007791519	0.025215149	0.30895805	-0.17040443
"1856_at"	0.1219883	0.08224821	0.1307931	0.07754755	0.15251541	-0.004744053	-0.04919052
"1857_at"	-0.2433877	-0.054451942	-0.41121578	0.00951767	0.3000102	0.066616535	0.24774933
"1858_at"	0.11762142	0.12745667	-0.08033657	0.031425476	-0.031425476	-0.2637062	-0.15977097
"1859_s_at"	-0.002346516	0.14346838	-0.16170168	0.034608364	0.01704979	-0.057272434	-0.12092543
"185_at"	-0.5627475	0.44119453	-0.375494	0.0827384	-0.28094292	0.012892246	-0.012892246
"1860_at"	-0.109576225	0.03054142	-0.09451342	-0.099618435	0.09374237	-0.109330654	0.017393589
"1861_at"	0.005917549	-0.16323996	-0.25283384	0.20949078	0.04484892	0.20443296	-0.001452446
"1862_at"	-0.03234911	0.16853905	0.1263876	-0.00773859	0.24118328	0.4272132	-0.25147247
"1863_s_at"	-0.35630083	-0.12103081	-0.19879103	0.07722759	-0.3625927	0.16152334	0.134449
"1865_at"	0.0947268	0.12540817	-0.056479692	-0.059798956	0.11959028	0.2612431	-0.23880053
"1866_g_at"	0.23679161	0.038150787	-0.006183624	-0.002725124	0.04583502	-0.09586096	-0.02788496
"1867_at"	-0.06667185	-0.043494225	-0.100016594	-0.15206718	0.017810345	-0.009567261	0.21601248
"1868_g_at"	0.019053936	-0.17042875	-0.21767902	0.032057285	-0.013361931	-0.122244835	0.013361931
"1869_at"	0.025913239	0.30755424	0.18051147	0.035045147	0.12632799	0.08108902	-0.2436018
"186_at"	0.18108463	0.18207717	0.42767763	-0.062819004	-0.003803968	-0.17396927	0.003803968
"1870_at"	0.19463682	-0.13785553	0.030316353	0.34001398	-0.030316353	-0.19213629	-0.17097473
"1871_g_at"	-0.06463957	0.16659522	0.041245222	0.051731348	-0.18989635	-0.04828739	-0.13455129
"1872_at"	-0.021390915	0.21952915	0.13134241	-0.004748821	0.17984486	-0.12109375	-0.12968183
"1873_at"	-0.22916412	-0.049543858	0.10135269	0.16313648	-0.110355854	0.009953499	-0.22246456
"1874_at"	-0.1488781	-0.25480795	0.017613888	0.32223606	-0.046551704	-0.017614365	0.093580246
"1875_f_at"	-0.1382699	-0.04367256	-0.003335476	0.053604603	-0.10076046	0.19825268	-0.027718067
"1876_at"	0.033620834	0.46833372	0.3495922	0.08925009	-0.55285454	-0.24111652	-0.033620834
"1877_g_at"	-0.36027384	0.18345642	0.20170927	-0.021641731	0.09881449	2.24E-04	-0.055142403
"1878_g_at"	0.5147934	0.22659779	0.13397503	-0.0881443	-0.21623707	-0.09105492	0.052660942
"1879_at"	0.4103179	0.14384079	-0.08854151	0.07923651	-0.10222483	-0.007022381	-0.14410496
"187_at"	0.16362	0.29137802	-0.18567371	0.13124704	0.035728455	0.11049843	-0.035728455
"1880_at"	-0.005890608	0.005890846	0.12080574	-0.18986511	-0.10651851	-0.27522612	-0.15982008
"1881_at"	0.56820154	0.18045425	0.47256136	0.58577585	-0.016343117	0.016343117	-0.46063662
"1882_g_at"	-0.004283905	-0.16948414	-0.015951157	0.16190386	0.004283905	-0.114179134	-0.06243658
"1883_s_at"	0.035853863	0.089440346	0.001040936	0.15283346	-0.00300312	-0.020531654	-0.006913185
"1884_s_at"	-0.20099783	-0.02035904	0.053569794	0.020358562	-0.5260134	-0.17588186	-0.19998121
"1885_at"	-0.029924393	0.12982607	-0.17865753	-0.001651287	0.10660076	0.056444168	-0.17021322
"1886_at"	0.24439478	0.22184277	0.22120476	0.024063587	-0.07348442	-0.087655544	-0.13646793
"1887_g_at"	0.16829681	0.3959937	0.18093014	-0.05284834	0.14874077	0.023636818	-0.15367794
"1888_s_at"	-0.0587883	0.078681946	0.041086674	-0.038064003	-0.05158615	0.006807804	0.04447794
"188_at"	0.07855749	0.25880337	0.048146725	-0.062707424	0.03944683	0.26968765	0.006302357
"1890_at"	-0.05010414	0.19394016	-0.00515604	0.00515604	0.20680046	-0.14670467	-0.13805532
"1891_at"	0.17915225	-0.10116196	0.019678831	-0.04259801	0.04794526	-0.14697409	0.2668159
"1892_s_at"	-0.03246498	0.11313963	0.2827177	0.042562008	0.05208969	-0.13530207	-0.017638206
"1893_s_at"	-0.22048712	0.07242584	0.035306454	-0.09684992	0.04155636	-0.007742882	-0.15364742
"1894_f_at"	0.4891634	-0.018208504	0.48754787	0.71850014	0.18995094	0.85027695	-0.33904648
"1895_at"	-0.13863802	0.28079128	-0.3461852	-0.24259377	0.26083326	0.03794241	0.42441702
"1896_s_at"	0.06345034	0.22872782	0.20512629	-0.040860176	-0.10916662	-0.19174671	-0.07742262
"1897_at"	-0.18568516	0.004283905	-0.004284382	-0.12368536	1.3792915	1.3649249	0.7998853
"1898_at"	-0.009660244	-0.012025356	-0.10972309	0.009660244	0.2334652	0.4843092	0.30776262
"1899_s_at"	-0.09918213	0.16966915	-0.1942358	-0.035972595	0.1637001	-0.23474932	-0.11888027
"189_s_at"	-0.14911556	0.076233864	-0.18707705	0.08264208	0.27291536	-0.028259754	-0.039589405
"1900_at"	-0.043141365	0.05761528	-0.18029666	-0.15193939	-0.16187382	-0.0346241	0.0346241
"1901_s_at"	0.0590086	0.08110714	0.004186153	0.0373168	-0.028808594	0.13201761	-0.004186153
"1902_at"	0.61355305	0.5750189	0.19045019	-0.044636726	-0.17705297	-0.18258429	0.031064987
"1903_at"	0.18556166	-0.16286898	0.18362093	0.52601814	-0.2889943	-0.43617105	0.048398018
"1904_at"	-0.17698526	7.44E-04	0.036041737	-0.14331484	-0.15285301	-0.06176138	0.08330488
"1905_s_at"	0.001406193	-0.024260044	0.055106163	-0.3156042	-0.20983362	-0.031268597	0.026735783
"1906_at"	-0.13341618	-0.041960716	0.08213425	0.3469	0.07635927	-0.07664347	-0.002466202
"1907_at"	-0.14798594	-0.043833733	-0.40651894	-0.0965209	-0.25961018	-0.3913741	0.043833733
"1908_at"	-0.05935812	-0.10364056	-0.027925491	0.016696453	0.22010231	0.041434288	-0.10055208
"1909_at"	-0.34952354	-0.298028	-0.41035366	0.39394283	0.023060322	-0.24288177	0.50395966
"190_at"	0.6225333	0.002104759	-0.392869	-0.21562481	0.40097952	-0.23391867	0.75437355
"1910_s_at"	-0.1082592	0.20164204	-0.022165298	-0.11453915	-0.14363766	-0.34236526	0.022165298
"1911_s_at"	1.1575441	-0.14466238	0.022450924	0.12137747	0.051629543	-0.5198288	-0.30170536
"1912_s_at"	-0.18241549	0.3038149	0.110607624	0.124323845	-0.012133122	-0.40812826	-0.095864296
"1913_at"	-0.037027836	0.23632002	-0.372478	-0.20327663	-0.004771233	-0.22177505	-0.044432163
"1914_at"	0.61505795	-0.20481396	-0.17623997	1.1016159	-0.09219074	-0.16326761	0.10579872
"1915_s_at"	-0.36010075	1.9104176	-1.1510162	-1.4457164	0.094316006	2.0269918	1.0033045
"1916_s_at"	-0.9956913	1.7024069	-2.9899445	-1.9963889	0.2755289	2.1365948	1.3372774
"1917_at"	-0.065401554	-0.36040688	-0.16115952	0.20041084	-0.05031109	-0.20808649	0.02027607
"1918_at"	0.40063715	0.33275032	0.29945087	0.028394222	0.22973633	0.2181058	-0.09043503
"1919_at"	0.02385807	0.17777205	0.026412487	-0.00394392	0.1030364	0.022875786	-0.13829279
"191_at"	0.097782135	0.013774395	-0.061549187	0.11785269	-0.03765011	-0.018601894	-0.16707087
"1920_s_at"	0.28992558	-0.07768583	0.39634895	-0.030646801	0.030646801	-0.42085886	-0.19291496
"1921_at"	0.256289	-0.05851221	0.15843105	-0.005990028	-0.13196373	-0.3495803	-0.06743336
"1922_g_at"	-0.002976179	0.2040782	0.002975941	0.045109987	-0.13253498	0.0808754	-0.17959571
"1923_at"	0.074688435	0.19664097	0.30833817	-0.08189964	-0.08037615	-0.1187346	-0.003398418
"1924_at"	0.53361464	-0.09063625	-0.37123346	-0.22685337	0.048009396	-0.06690502	0.58461714
"1925_at"	0.08276558	0.415936	-0.11464405	0.030398846	-0.17436695	-0.030398846	-0.06982422
"1926_at"	-0.003864765	-0.2586236	-0.5262356	0.033441544	-0.0371871	0.36244488	0.033118248
"1927_s_at"	0.43813705	0.08009291	0.019114017	0.051686287	0.20192575	0.2514782	-0.2004714
"1928_s_at"	-0.04649496	-0.42617655	0.4075551	0.41427135	-0.17616081	-0.01959467	0.1388154
"1929_at"	-0.17074013	-0.051347733	0.60653114	0.65584373	-0.09398031	-0.45642138	0.006885529
"192_at"	-0.552001	-0.11167383	-0.19330406	0.07025528	-0.029079437	-0.13421154	0.02907896
"1930_at"	-0.015046597	0.11153746	-0.014656544	0.014656067	0.08114958	0.16123486	-0.17955875
"1931_at"	0.16814232	0.55476	0.154428	-0.043926716	-0.03520584	0.15404034	-0.11403084
"1932_at"	-0.024757385	0.12349129	-0.020650864	0.0067873	0.13090897	-0.051099777	-0.08307266
"1933_g_at"	0.027724266	-0.22403574	-0.05751276	0.047688007	0.26920128	-0.2702284	-0.118003845
"1934_s_at"	0.063354254	-0.024660587	0.002667427	-0.005087137	-0.002667427	-0.37933373	-0.056877136
"1935_at"	0.019973993	0.1798315	-0.13481426	-0.07626438	-0.10641575	0.2491014	9.40E-04
"1936_s_at"	-0.00131321	0.046260834	-0.12187767	0.05430603	-0.19912434	-0.1403265	-0.0677557
"1937_at"	-0.61076975	-0.044251442	-0.30436802	-0.13809347	0.9198327	-0.17750406	-0.08277321
"1938_at"	0.170856	0.0431633	0.056319714	0.003371716	0.030412197	0.083741665	-0.04868126
"1939_at"	0.001694202	0.008582592	-0.001693726	0.11108112	-0.011217117	-0.026585102	-0.09615946
"193_at"	-0.22817755	0.016907215	-0.37251902	-0.15454769	0.021489143	-0.10270786	0.16625357
"1940_at"	-9.33E-04	-0.61138964	-0.46362305	0.5755539	-0.07361698	-0.3023696	0.14210653
"1941_at"	-0.030605316	0.13080645	0.20785666	-0.006822109	0.06565189	0.08417988	-0.10103321
"1942_s_at"	-0.23481989	-0.28566933	-0.2722354	0.12573242	0.018810272	-0.061531067	0.05998993
"1943_at"	-0.29805994	-0.018167496	-0.055888176	0.008596897	0.02098751	-0.04550028	-0.18434048
"1944_f_at"	0.12224293	0.49856472	0.1705904	0.26867104	-0.02083397	0.10594082	-0.40727997
"1945_at"	0.08072448	0.028735876	-0.05865431	-0.04819274	-0.004904985	-0.144454	-0.10203695
"1946_at"	0.10151625	0.27767372	-0.03799534	0.012063026	0.20699644	0.10458851	-0.17639399
"1947_g_at"	-0.021561623	0.051689625	0.02982378	0.32400036	-0.061396122	-0.054080486	-0.05802679
"1948_f_at"	-0.2411561	-0.31182003	0.6521826	0.0470109	0.08259201	-0.16179657	-0.040938854
"1949_at"	0.33087492	0.5489769	0.20530224	-0.052388668	-0.15832901	0.23823452	-0.23685122
"194_at"	-0.11227274	0.04297495	0.030223608	-0.1075716	0.0396657	0.005061865	-0.006538391
"1950_s_at"	0.096829414	0.0912385	-0.08120155	-0.013792038	0.065187454	-0.1290307	-0.29385757
"1951_at"	0.472116	1.6928258	0.23936701	-0.067448616	-0.20864964	-0.003816605	-0.13249493
"1952_s_at"	-0.11053586	0.034258604	-0.14683867	-0.14181924	-0.28878403	-0.20920825	0.34250975
"1953_at"	0.16015244	-0.10647535	-0.6906905	0.09550381	0.5850706	-0.83841705	0.18490314
"1954_at"	0.20853949	-0.33002472	-0.42198467	0.04257536	-0.09276962	-0.24358368	0.050344944
"1955_s_at"	-0.14515686	0.09745455	-0.020577908	0.016880512	0.12574959	-0.016880512	-0.038562775
"1956_s_at"	0.0446496	0.14146233	0.38691568	0.14435148	0.044189453	0.18679762	-0.3896613
"1957_s_at"	0.056762695	-0.10747051	0.21162033	0.13646984	-0.013247967	-0.20098114	0.080127716
"1958_at"	-0.13191533	0.15581131	-0.008058071	-0.16359854	0.2165463	-0.1375277	0.065826654
"1959_at"	-0.72650576	-0.8268652	-0.62695503	0.60920525	-0.24939919	-0.34837675	0.3146987
"195_s_at"	0.05116129	-0.19493294	-0.1533308	-0.23667145	0.3580289	0.2618127	0.18865919
"1960_at"	-0.1468029	0.10154724	0.594965	0.12540054	0.022222996	0.00829649	-0.123170376
"1961_f_at"	0.0984478	-0.015543461	1.3716612	1.0886145	0.015543938	-0.1005559	-0.27592278
"1962_at"	-0.07234812	0.18044996	0.17939949	0.03647995	-0.064050436	0.29663086	0.05215597
"1963_at"	-0.15713978	0.15563726	-0.26776886	0.023665905	-8.63E-05	-0.075606346	-0.086455345
"1964_g_at"	0.014308453	0.041963577	-0.4754181	-0.014308453	-0.073527336	-0.37480783	0.069704056
"1965_s_at"	0.092354774	-0.011314392	0.011314392	-0.01782322	0.085505486	-0.09171343	-0.17331457
"1966_i_at"	0.05669689	0.21530247	-0.1091032	0.10510826	0.11720562	-0.18643475	-0.0766449
"1967_f_at"	0.067131996	0.25556374	0.053479195	0.07488251	-0.067127705	-0.04055643	-0.17058706
"1968_g_at"	0.047281742	0.23459053	0.008831978	0.06389904	-0.008831978	-0.05514145	-0.15153551
"1969_s_at"	0.05874777	1.0567231	0.17395782	-0.20244694	-0.10968447	-0.35182476	0.032303333
"196_s_at"	0.0703938	0.26135778	0.20659184	-0.05538106	0.21810246	-0.02280283	-0.14277387
"1970_s_at"	0.002401352	0.10316801	-0.2541256	-0.002401352	-0.063313484	-0.004336357	0.10012913
"1971_g_at"	-0.012657642	0.11933708	-0.11456776	-0.14432573	-0.21785593	-0.31424952	-0.1629343
"1972_s_at"	-0.18560886	0.00416851	-0.00416851	-0.17630863	-0.008077145	-0.22004938	-0.17630672
"1973_s_at"	0.17508936	-0.11886406	0.10641098	0.47496843	-0.115597725	-0.10641098	-0.29450083
"1974_s_at"	0.38628197	0.25921583	0.19371653	0.06431866	0.04903412	0.02840805	-0.16956043
"1975_s_at"	0.011171341	0.2041521	0.019587994	0.14528513	-0.011171341	-0.11610079	-0.24059486
"1976_s_at"	0.24873161	0.23574495	-0.001931667	0.253335	-0.08916283	0.12955189	-0.23913908
"1977_s_at"	0.20112562	0.12984419	0.24426556	0.11985922	-0.07193327	0.12280607	-0.107468605
"1978_at"	0.25469518	0.2498281	-0.070446014	0.0449934	0.004631519	-0.20712185	-0.16380239
"1979_s_at"	0.35624552	-0.05045843	-0.22717142	0.23255777	-0.13400412	-0.20019007	0.03731346
"197_at"	-0.41909122	8.67E-04	-0.12505817	-8.67E-04	-0.06417942	0.22457314	0.07367039
"1980_s_at"	-0.11734295	-0.030035019	0.090807915	-0.2683792	0.16802502	0.03557968	-0.061011314
"1981_s_at"	-0.029223442	0.38261175	0.20443678	0.25283194	-0.25410986	-0.091146946	-0.30233812
"1983_at"	0.00627327	0.09265089	-0.045813084	-0.00627327	0.0687294	-0.034505844	-0.14530134
"1984_s_at"	0.29493713	0.22386599	0.056711674	0.42353344	-0.36223364	-0.2607355	-0.2241149
"1985_s_at"	-0.251019	0.083512306	0.21525574	-0.0066185	-0.11081219	-0.029374123	0.0066185
"1986_at"	-0.0774703	-0.18048763	0.16482306	0.02754879	-0.30054522	-0.41692352	0.022054672
"1987_at"	0.07065725	0.112449646	0.08400631	0.016648293	0.01635313	-0.101615906	-0.086449146
"1988_at"	0.04796219	-0.06397629	3.15E-05	-3.15E-05	0.13853359	0.14597702	-0.064621925
"1989_at"	-0.005668879	0.007151365	-0.06903458	0.035460472	0.005668879	0.1651485	-0.16657567
"198_g_at"	-0.64612293	0.050629616	-0.3334751	0.07882404	-0.008563995	0.40448475	-0.116788864
"1990_g_at"	0.16069317	0.17991638	-0.014033318	0.01317358	-0.018417358	0.20920134	-0.12759876
"1991_s_at"	0.116671085	0.02610445	0.007886887	0.11126757	-0.007886887	-0.05005026	0.058879852
"1992_at"	-0.19676542	0.023338795	-0.07708454	-0.29060125	0.20646381	0.068754196	0.11458826
"1993_s_at"	0.11257362	0.23235989	0.092169285	-0.067783356	0.040401936	0.055304527	-0.07403898
"1994_at"	0.040682316	0.04375744	-0.11374998	7.99E-04	-0.028577328	-0.16483688	-0.07124281
"1995_at"	0.029203892	0.15746069	-0.013995647	0.1598053	-0.019508839	0.013995647	-0.24717999
"1996_s_at"	-0.12280083	0.13540745	-0.086654186	0.08425951	0.17150068	-0.0695529	-0.07727194
"1997_s_at"	0.27755117	0.6147208	-0.005533695	-0.07415676	0.032208443	0.14927292	-0.19224119
"1998_i_at"	0.51924324	0.58381176	0.6833906	0.050765038	0.36030102	0.78792286	-0.050765038
"1999_s_at"	0.07085419	0.23251629	-0.037591457	-0.02891779	-0.050341606	0.028917551	-0.04196906
"199_s_at"	-0.35290384	0.03345108	-0.20858479	-0.016773224	-0.11303139	-0.18434668	0.12883425
"2000_at"	-0.2611375	-0.45333338	-0.6731081	-0.30159855	-0.00729847	-0.017858028	0.3186369
"2001_g_at"	0.07974815	0.0554986	0.09550762	-0.02037716	0.11501598	0.04283285	-0.028428555
"2002_s_at"	0.27081966	0.47205067	-0.018614769	0.0449872	0.183599	-0.007055759	0.004332542
"2003_s_at"	0.12477684	-0.30057526	-0.22782803	0.26544666	-0.100905895	-0.20388651	0.2447052
"2004_at"	0.21445179	0.4024887	-0.029538155	-0.27892542	0.017376423	0.14284658	0.07109451
"2005_s_at"	0.17666149	0.061353683	0.06148815	-0.047279835	0.12814999	0.216578	-0.102674484
"2006_at"	0.12252331	0.004026413	0.036372185	-0.004026413	-0.038281918	0.027688503	-0.031397343
"2007_g_at"	0.11326122	-0.09505749	-0.101397514	0.1354971	-0.01119709	-0.07882881	-0.04357338
"2008_s_at"	0.06790686	0.06642008	0.016708374	-0.056859255	-0.27162242	-0.016708374	-0.06387353
"2009_at"	0.22418785	0.15978718	0.34602785	0.080215454	-0.059863567	0.11928892	-0.05641079
"200_at"	0.14165115	0.28695917	-0.02849102	-0.19643593	0.10167074	-0.13164997	0.089446545
"2010_at"	-0.5196123	-0.13732624	0.025652885	0.1465826	0.07104206	-0.11043787	-0.025652885
"2011_s_at"	0.06875849	-0.024599075	-0.08154678	0.06643534	0.108235836	0.024598598	-0.20376825
"2012_s_at"	-0.08670521	-0.68026733	0.03454399	0.3466463	-0.35101366	-0.28833532	-0.026932716
"2013_at"	0.14969158	0.12547016	0.07049942	0.11957073	-0.041711807	0.01813984	-0.09937477
"2014_s_at"	0.29530954	0.21339655	-0.050670147	0.06325054	0.004801273	-0.004801273	-0.061687946
"2015_s_at"	-0.24044132	0.08836365	0.31109	-0.02550459	-0.34511566	0.008508205	-0.20455027
"2016_s_at"	-0.38936424	-0.016453743	0.6207304	-0.022060394	-0.017460823	-0.11173248	0.27793312
"2017_s_at"	-0.3695159	-0.032523632	-0.3647418	0.34541035	-0.41984415	-0.5554104	0.094302654
"2018_at"	-0.017149448	0.1228981	0.034702778	0.057919025	0.038728237	0.076817036	-0.1004343
"2019_s_at"	0.08796406	-0.02577591	-0.06722355	0.19223309	0.17602062	0.15441513	-0.1180768
"201_s_at"	-0.035143852	0.17252731	0.98711586	0.035536766	-1.0933275	-1.4729176	-1.0912523
"2020_at"	0.10131836	0.30665302	-0.040136337	1.387557	-0.17634487	-0.019299507	0.003430367
"2021_s_at"	0.005568981	0.107278824	-0.030844688	-0.005568981	0.020822048	0.021319866	-0.101242065
"2022_at"	-0.017739773	0.13515186	0.04114437	0.017739773	-0.19484806	-0.2545004	-0.09845257
"2023_g_at"	0.037765026	0.03028822	0.24013805	0.093001366	-0.03430605	-0.01105547	-0.25536776
"2024_s_at"	-0.200109	-0.026168823	0.03553009	-0.10239458	-0.10646057	0.32676697	-0.039498806
"2025_s_at"	0.19945908	0.3254366	-0.066782	0.066782	-0.25090647	-0.26157904	-0.20150805
"2026_at"	-0.03522587	0.117304325	0.11777258	-0.030333042	-0.06574106	-0.2071147	0.07330322
"2027_at"	-0.088502884	-0.018005371	0.005243301	0.19780302	1.7692757	0.10341072	-0.03468561
"2028_s_at"	0.1489892	-0.017571926	-0.064033985	0.24396372	0.06756735	0.046636105	-0.21630192
"2029_at"	-0.039001465	-0.060935974	0.038530827	-0.12643623	-0.07220554	-0.03570652	0.035345554
"202_at"	-0.10508537	-0.14599705	-0.05573702	0.029108524	0.022174835	-0.022174358	0.19008493
"2030_at"	0.00207901	-0.09053087	0.040067196	0.07502985	0.35126925	0.007296085	-0.13091087
"2031_s_at"	-0.008356094	-0.10953426	0.023402214	-0.49752426	0.008356094	-0.7610688	0.339715
"2032_s_at"	0.24722576	0.059405327	-0.05251789	0.092515945	-0.00897789	0.00897789	-0.07886028
"2033_s_at"	0.66014004	-0.11877489	-0.108076096	-0.12313461	0.015115261	-0.061001778	0.057165146
"2034_s_at"	0.27270412	0.22486544	0.17519379	0.005893707	-0.069220066	0.10010815	-0.09450197
"2035_s_at"	0.88716984	-0.112490654	-0.43402863	-0.12857056	0.77439404	0.36524773	0.11297703
"2036_s_at"	0.03565097	0.69156146	0.5696771	-0.15275478	0.4192078	-0.09120345	0.024509192
"2037_s_at"	0.020288944	0.16485643	-0.026921272	0.3262987	-0.025404453	-0.14551306	-0.09556866
"2038_g_at"	0.11670399	-0.054977894	-0.089062214	0.03490019	0.20897865	0.047615528	-0.15492535
"2039_s_at"	-0.13289642	-0.92042255	0.1265688	0.095653534	-0.2266841	-0.5011649	0.1806364
"203_at"	0.22199011	0.23917103	0.026539803	-0.01832056	0.12504482	0.03433895	-0.16875792
"2040_s_at"	0.15807581	0.112232685	0.00376749	0.15755653	-0.04360962	0.30693054	-0.18298197
"2041_i_at"	0.134552	0.0991807	0.20248318	0.16364145	0.422822	0.6610284	-0.57541895
"2042_s_at"	0.02769804	0.24122095	0.2938099	0.07318783	-0.041045666	0.50451803	0.027148247
"2043_s_at"	0.07732725	0.056980133	-0.20858908	-0.013636112	-0.0784955	0.013636112	-0.17861748
"2044_s_at"	-0.072383404	-0.8122556	-0.17818737	0.25065088	-0.2689891	-0.101071835	0.5348754
"2045_s_at"	0.05609131	0.16141653	-0.1167326	-0.012032509	-0.16499805	0.36951494	-0.142385
"2046_at"	-0.048293114	0.12038326	-0.03217697	0.058390617	0.2634468	0.015529633	-0.03439045
"2047_s_at"	-0.07264519	-0.12808132	-0.15233994	-0.01727581	0.18591022	0.059645653	0.030743599
"2048_s_at"	0.055501938	0.038633347	0.12393427	-0.031334877	-0.24641085	-0.21967363	0.031334877
"2049_s_at"	0.2894287	0.22036171	-0.6379032	-0.9405813	-0.6542945	0.5018091	-0.03827095
"204_at"	0.011741638	0.16299105	0.22483301	0.020995617	0.03437376	-0.011741638	-0.09913874
"2050_s_at"	-0.5039191	0.019352913	-0.29336214	0.17424583	-0.17344522	-0.35051155	0.057216644
"2051_at"	0.21250439	0.38719273	0.48339558	0.051481247	0.22047901	0.47616673	-0.051481247
"2052_g_at"	0.02000904	-0.035538673	-0.020008564	-0.31134844	-0.06434202	0.6019573	0.16967058
"2053_at"	-0.060048103	-0.5772319	-1.0691724	-0.65228176	0.29129982	0.13674068	0.39805698
"2054_g_at"	-0.075463295	0.021006584	-0.51300955	-0.5447931	0.047031403	-0.021006584	0.539711
"2055_s_at"	0.16903067	-0.04888296	0.04273081	0.004686832	-0.023128986	0.076779366	-0.12142706
"2056_at"	-0.25688744	-0.40605354	0.26275253	0.6805935	0.43328762	8.68E-05	-0.014128685
"2057_g_at"	-0.49316025	-0.6464157	0.42690086	1.3281202	0.65817356	-0.27476788	-0.050845146
"2058_s_at"	0.11227131	-0.17663288	-0.32618332	-0.1876874	0.52464676	-0.026428223	0.2393961
"2059_s_at"	0.006426811	0.10715294	0.026998043	-0.006426811	-0.036489487	-0.22630262	-0.12323713
"205_g_at"	0.39570808	0.17767477	0.21243382	0.07147598	0.14508057	0.39293098	-0.13894653
"2060_at"	0.06332111	0.09090233	0.040082455	0.08615017	-0.00152874	-0.16335964	-0.070617676
"2061_at"	0.029330492	0.09517789	0.23451447	0.010623694	0.002210379	-0.08757663	-0.055149317
"2062_at"	0.14001274	0.25052452	-1.006424	0.2972288	-0.14001274	-0.25636864	-0.31357002
"2063_at"	-0.48591495	-0.37755418	-0.5154755	-0.25308943	0.052855015	-0.19894695	0.3004279
"2064_g_at"	-0.008206844	0.004947662	-0.004947662	0.07422352	0.0866766	-0.1031785	-0.044563293
"2065_s_at"	0.09877825	0.29539204	0.59964705	-0.12317181	-0.012152672	0.34125757	-0.1841197
"2066_at"	0.07791853	0.11025095	0.008818626	0.1386342	0.1314168	-0.024066448	-0.08902693
"2067_f_at"	0.28003693	0.3731823	0.29752302	-0.03682232	0.036822796	0.4227929	-0.085832596
"2068_s_at"	0.15060282	0.025541306	-0.117043495	-0.02315569	0.07171631	0.29405212	-0.22835398
"2069_s_at"	0.3817582	-0.1673665	-1.4894791	-0.75825834	0.16281462	-0.18342638	0.20536613
"206_at"	0.02847433	0.3752823	-0.02847433	-0.050115585	-0.14010048	-0.07916212	0.09962845
"2070_i_at"	-0.012029886	0.28689456	0.061690092	-0.17580867	0.14277601	-0.12096763	-0.022137642
"2071_s_at"	-0.029423237	0.07809448	-0.1489501	0.004776955	-0.09766388	-0.004776955	-0.16321278
"2072_at"	0.015705585	0.028761387	-0.1586585	-0.15276623	0.21549988	-0.11969328	-0.01303196
"2073_s_at"	0.02572155	0.08238077	0.5711169	0.06576443	-0.001167297	-0.011611939	-0.10343981
"2074_at"	-0.009713173	0.2845564	-0.06112194	0.05446863	0.116089344	0.02097416	0.00971365
"2075_s_at"	0.47625637	0.011301041	-0.043283463	0.2219429	-0.058374405	0.022457123	-0.056526184
"2076_s_at"	0.095220566	0.23676062	-0.006150723	0.05627966	0.19131565	-0.050833225	-0.15866947
"2077_at"	0.20782804	0.1849351	-0.24675941	0.14160061	-0.043885708	-0.092059135	-0.042699337
"2078_s_at"	0.15527582	0.08938789	0.25661612	0.16350937	-0.01297617	-0.29046488	-0.12917376
"2079_s_at"	0.050102234	0.16722822	0.21375132	0.013561726	-0.079615116	0.128376	-0.03316927
"207_at"	0.3808117	-2.14E-04	-0.18444538	0.01668644	0.089692116	0.27219963	-0.13518047
"2080_s_at"	0.09531641	0.26691914	0.16504812	-0.122479916	0.056900024	0.004071713	-0.08108163
"2081_s_at"	0.11996317	0.029354095	0.06746173	-0.006238222	-0.07622433	-0.19628596	-0.04190755
"2082_s_at"	0.003887177	0.1461358	0.08976841	0.025027752	-0.0393672	-0.13333607	-0.0470109
"2083_at"	0.23672771	0.3073578	0.53378916	-0.09218693	0.23309469	0.62856436	-0.17109585
"2084_s_at"	0.04808998	0.08644581	0.014145851	-0.010102272	0.010581017	-0.014537811	-0.07590008
"2085_s_at"	0.42415333	-0.09031916	-1.0473204	-0.6455226	0.4264965	-0.1660428	0.32879496
"2086_s_at"	0.11539602	-0.07428312	-0.22090244	-0.17061424	0.72822666	0.20118189	0.9211378
"2087_s_at"	-0.86141086	0.5375867	-0.3991661	-0.073903084	-0.20590734	-0.2285757	0.38206577
"2088_s_at"	0.22189856	0.1996355	0.007976055	0.08131933	-0.007437706	0.060111523	-0.23321867
"2089_s_at"	0.10193634	-0.10190582	0.038668633	0.049570084	0.05969572	-0.15063143	-0.08046055
"208_at"	0.18026972	0.4825554	-0.0956974	-0.45992708	-0.24026155	-0.1528039	0.088581085
"2090_i_at"	0.24822998	0.2659378	0.049877167	0.23801994	0.002025604	-0.1282835	-0.2509327
"2091_at"	0.12431431	-0.024799824	0.22159624	0.39433765	0.14339304	0.00604105	-0.031089783
"2092_s_at"	-0.5040283	0.7061739	-0.31735325	0.1371069	1.864182	-0.033086777	0.033086777
"2093_s_at"	0.070931435	-0.7665715	-0.30927467	-0.070931435	-0.21785355	-0.18221378	0.27903175
"2094_s_at"	-0.084555626	1.1307135	-0.55604935	-0.3352995	-0.20360565	1.0549307	0.2954731
"209_at"	0.07423639	0.40178013	-0.040755272	0.098186016	0.009849548	0.14031458	-0.24653769
"210_at"	-0.014467239	0.088754654	-0.13058662	-0.09442997	0.006352425	-0.006352425	-0.006838799
"211_at"	-0.030985355	-0.013617516	0.07216883	-0.16345882	0.056895256	-0.13950872	-0.12571096
"212_at"	-0.05405712	-0.02786827	-0.002937317	0.002937317	0.016852379	-0.14477444	0.12690163
"213_at"	-0.13452768	-0.23111296	-0.033460617	0.12540913	0.38781834	0.02763462	0.09729147
"214_at"	-0.13506985	-0.3070078	-0.13864994	0.11901283	0.18939686	0.006342888	0.24327755
"215_g_at"	-0.102295876	-0.17481089	-0.16611576	0.030900002	0.08969498	-0.019885063	0.17032051
"216_at"	0.057307243	0.4663601	-0.10233116	-0.036847115	0.18710995	0.047297478	-0.07447147
"217_at"	0.007258892	0.16589451	-0.038354874	-0.029064178	0.15890169	-0.007258892	-0.06806326
"218_at"	-0.013333321	0.64718485	0.28605843	0.4304185	0.004990578	-0.00548029	-0.14446592
"219_i_at"	0.004391909	0.007423639	-0.04893756	-0.010118246	-0.037695646	0.034171343	-0.004391909
"220_r_at"	0.61500216	0.6671772	0.83725166	0.11447096	0.38169765	0.63361406	-0.11447096
"221_s_at"	-0.012816906	0.15851498	-0.31661606	-0.026643753	-0.115859985	-0.116007805	-0.050736427
"222_at"	-0.011972427	0.08122063	0.007603645	-0.022949219	0.15855789	-0.2612381	-0.06810379
"223_at"	-0.2384758	-0.32868862	-0.20394087	-0.02430439	0.079990864	0.023776054	-0.06252241
"224_at"	-0.82977724	0.21494675	-0.8073673	-0.062809944	0.21358061	-0.4903121	0.85642815
"225_at"	-0.43794155	-0.009278297	-0.28448105	0.009278297	0.08403301	0.9735632	0.16438198
"226_at"	-0.31011868	-0.95247173	-0.005893707	0.39581394	-0.81284714	-1.2076845	0.42797756
"227_g_at"	-0.04513073	-0.65461636	-0.09670544	0.4993639	-0.6247997	-0.7613373	0.52632904
"228_at"	0.1568942	-0.023111343	-0.15472937	-0.18125868	-0.17060232	-0.32804632	0.31035995
"229_at"	-0.18321896	0.08376455	-0.22497416	0.023235321	0.005975723	-0.3007679	0.053716183
"230_s_at"	-0.4610405	-0.45059872	-0.6617718	-0.2340684	2.7582812	3.1143193	2.6368537
"231_at"	0.004612923	0.16441774	0.2719593	0.16961527	0.29314184	0.21016598	0.003463268
"232_at"	0.011064529	0.14038658	-0.31663084	0.12650824	-0.005403042	-0.290452	-0.03855133
"233_s_at"	-0.00212574	0.21935892	0.18193054	0.051068306	-0.014235973	-0.050607204	-0.068844795
"234_s_at"	-1.244936	-1.2184982	-1.2176533	-0.20759249	0.22949314	1.042901	1.2463903
"235_at"	-0.043432713	0.21525812	0.135046	0.073133945	-0.003256321	0.099473	-0.09672928
"236_at"	-0.03610134	0.09151459	-0.11074495	0.00864315	-0.25438213	0.043399334	-0.04655838
"237_s_at"	-0.18550539	-0.002817631	-0.494246	-0.24769354	-0.12019396	-0.081985	0.19966888
"238_at"	-0.23386478	0.08580446	-0.013557434	-0.021537542	-0.11285019	-0.06763387	-0.09614658
"239_at"	0.41327667	0.22305489	-0.03388977	0.2962494	-0.18037224	0.27877045	0.054167747
"240_at"	0.08192682	0.1451559	0.23653126	0.02712965	0.12960482	0.29479694	-0.14388609
"241_g_at"	-0.121219635	0.09903145	0.6068392	-0.050312996	-0.21909046	0.05705738	-0.08196163
"242_at"	0.314116	-0.004580021	0.67039347	0.4411111	-0.42283583	0.004580021	-0.2232337
"243_g_at"	0.04519558	-0.04519558	0.589931	0.4824953	-0.16707993	-0.21900463	-0.38080692
"244_at"	0.23183966	-0.1398058	0.12668943	0.22948647	0.003524303	0.24612856	-0.003524303
"245_at"	-0.26938438	-0.3003888	-0.807539	-0.40988398	0.59043837	0.33229303	0.56731844
"246_at"	0.009510517	-0.09972954	-0.11436224	0.051663876	-0.009510517	0.21927309	0.021519184
"247_s_at"	6.09E-04	-0.017745018	-6.09E-04	0.15000725	0.09037399	0.008310318	-0.14001226
"248_at"	-0.04315853	-0.0847621	0.3420744	0.022822857	-0.11064625	-0.14038897	-0.038895607
"249_at"	0.019086838	0.10936785	0.045958042	0.093634605	0.057718754	0.012074947	-0.133358
"250_at"	-0.10146856	-0.008591175	-0.13190126	0.050451756	-0.002418041	0.09527874	-0.24174976
"251_at"	0.005853176	-0.17319775	-0.055985928	0.019096851	0.14932394	0.5841155	-0.09132433
"252_at"	0.0099473	0.16431284	-0.10672045	-0.004523754	-6.99E-04	-0.036863804	-0.059524536
"253_g_at"	0.16660309	0.18113804	-0.059339523	0.08554363	-0.040601254	-0.006935597	-0.1451354
"254_at"	-0.5453949	-1.1750212	-0.493371	0.36752033	-0.1494627	0.17961884	0.2651949
"255_s_at"	0.023674965	0.18342781	0.09457016	0.23734379	-0.001583099	0.001583099	-0.17045212
"256_s_at"	-0.22906017	-0.43936443	0.37705612	0.41488743	0.29001236	0.15393448	-0.08333111
"257_at"	-0.1601429	0.2378931	-0.06227851	0.024096012	-0.07781744	-0.3163345	0.04251194
"258_at"	0.10069752	0.026949406	-0.13648367	0.017447948	0.014073372	-0.08105564	-0.11671257
"259_s_at"	0.11132336	0.1219964	-0.14908266	-7.71E-04	-0.1504345	-0.28002262	-0.07322025
"260_at"	-0.13919973	-0.46490288	0.49614382	-0.22883081	0.07480621	0.23849964	0.28567553
"261_s_at"	-0.12028146	0.33994365	-0.09085369	-0.05275607	0.15505552	0.01418066	-0.01418066
"262_at"	0.06985426	-0.3513837	-0.5022049	-0.3010645	-0.034015656	-0.52837276	0.2569189
"263_g_at"	-0.027685642	-0.16442013	-0.21549273	-0.2609024	-7.08E-04	-0.33958435	0.22326946
"264_at"	0.23553896	0.2515664	0.37027168	0.16069937	-0.018345833	0.09710741	-0.115297794
"265_s_at"	-0.06999326	0.35121775	0.041820526	-0.08612251	-0.15367126	0.08391142	1.4810934
"266_s_at"	-0.24323606	-0.17301416	-0.41021585	-0.1659174	0.80107737	0.5510912	0.68785477
"267_at"	-0.27345276	-0.08539486	0.2630825	0.1908598	-0.109781265	-0.28858614	-0.2516818
"268_at"	0.5514674	0.11015272	0.19588947	-0.027934551	0.086202145	-0.25227022	-0.1380024
"269_at"	0.20724916	0.15406656	0.23937654	-0.003631115	0.19851732	0.20947981	-0.0948534
"270_at"	0.09794998	0.109778404	-0.017168522	0.033789158	0.017168522	0.15475464	-0.34124088
"271_s_at"	-0.12691832	0.01952362	-0.06522703	-0.180336	0.051038742	-0.004165173	0.05767107
"272_at"	0.5186219	0.20911455	0.5888052	-0.007629871	0.14882994	0.33266544	0.007629871
"273_g_at"	-0.13894176	0.25130033	-0.051725388	0.076648235	0.065672874	-0.002719879	0.11179733
"274_at"	-0.05373764	-0.11885786	-0.021059036	-0.06335735	-0.25517416	-0.18956566	0.02832222
"275_at"	0.018534184	0.07304859	-0.018534184	0.24490595	-0.03200054	-0.09388161	-0.10975361
"276_at"	-0.083833694	-0.1501751	-0.22996807	0.61225414	-0.3902073	-0.4867649	-0.2722168
"277_at"	0.55477333	-0.33268213	-0.7902031	-0.416564	0.07432461	-0.320827	0.50802135
"278_at"	0.059940338	0.020441532	0.027700901	0.14219093	-0.1468873	-0.28163815	-0.112472534
"279_at"	1.4067569	1.0803857	-0.3148322	0.046215057	-0.41135645	0.099024296	-0.058090687
"280_g_at"	1.7412472	1.1478653	-1.6128793	-0.18109131	-0.8068199	0.16343689	0.10001087
"281_s_at"	0.27599764	0.16623974	-0.01732397	0.08214712	0.01732397	0.07554531	-0.24803782
"282_at"	-0.12882805	-0.050868273	0.073474646	-0.114696264	0.043001175	0.121631384	0.098053455
"283_at"	0.012212753	-0.25298595	-0.21008301	-3.95E-04	-0.19977379	0.35870838	0.24977398
"284_at"	-0.08847809	0.05792904	0.09434652	0.070189	0.11497688	-0.25871992	-0.21665382
"285_g_at"	0.14499831	0.32030773	0.3406086	-0.16337156	-0.035834074	0.108035326	-0.020323277
"286_at"	-0.07473421	-0.36273575	-0.08109188	0.21259117	0.77952003	1.0089674	0.07168579
"287_at"	0.26212072	-0.33926105	-0.50198555	-0.55764294	0.21604156	0.68572474	0.34763288
"288_s_at"	0.04284239	-0.060506344	-0.14683867	-0.06954098	0.12435627	0.22514057	0.2209301
"289_at"	0.25117588	-0.4438095	-0.002570152	-0.125453	0.007096767	-0.04240942	0.09012365
"290_s_at"	0.013092041	-0.021810055	-0.04737234	-0.109193325	-0.013091564	-0.028796673	0.10772085
"291_s_at"	-0.21631098	-0.21481133	-0.004222393	0.05838585	0.7793436	0.004222393	-0.07641649
"292_s_at"	-0.422462	-0.60862255	-1.0096436	-0.27291632	0.5252485	0.121227264	0.49526262
"293_at"	0.1769476	0.32563686	0.40756035	-0.005157471	0.042349815	0.043117523	-0.3084402
"294_s_at"	-0.006435394	0.006435394	0.2532463	0.21001053	-0.0457325	-0.23464298	-0.0833931
"295_s_at"	0.36980247	-0.028560638	0.34060335	0.34546757	-0.017532349	-0.036773205	-0.16613197
"296_at"	0.47940922	-0.063381195	-0.049803734	-2.3100286	-0.28433704	-0.25516415	1.4944038
"297_g_at"	0.10260725	-0.39822054	-0.3555317	-1.6615148	-0.36019564	-0.42421913	1.2443681
"298_at"	0.2298398	0.31255674	0.15554953	0.031796932	-0.04097414	-0.024046421	-0.1933775
"299_i_at"	0.22766495	0.060871124	0.19039059	-0.024003983	0.103703976	0.03522587	-0.08337879
"300_f_at"	-0.2872095	-0.18724251	-0.09375	0.022467613	0.23313761	0.0809145	-0.022467613
"301_at"	0.20749807	0.10922432	0.05927086	0.013789177	-0.063830376	0.20269871	-0.2085638
"302_at"	-0.11864948	0.17886353	-0.22047472	0.17775393	0.046840668	-0.041254997	-0.084795
"303_at"	-0.03797245	-0.08907461	-0.1014123	0.006989956	-0.09624481	0.01466465	-0.18059492
"304_at"	-0.025765419	0.04705286	0.025765419	0.20323944	-0.39286733	-0.118038654	-0.07570839
"305_g_at"	-0.2516837	-0.06901455	-0.10621309	0.24615574	-0.3731432	-0.07931328	0.04147625
"306_s_at"	-0.27187443	-0.53031445	-0.702301	0.12509823	0.10604668	-0.02583599	0.2717905
"307_at"	0.004031658	0.30657053	-0.10926628	0.024933815	0.15579462	0.31012583	-0.020680904
"308_f_at"	-0.12022543	-0.21633911	-0.3235321	-0.026247025	4.6939173	3.280611	3.5878534
"309_f_at"	-0.407094	-0.04714632	-0.11312914	-0.3766055	4.986326	4.3030863	4.261757
"310_s_at"	-0.02514267	0.26648855	0.15035868	-0.012372017	0.11775923	0.012372017	-0.17724943
"311_s_at"	0.17715359	1.9854722	-0.17715359	1.3013663	-0.26257992	-0.30348015	-0.38103628
"312_s_at"	-0.17422676	-0.23675823	0.030407429	0.23891878	-0.26391077	-0.121790886	0.12636185
"31307_at"	0.003549099	0.22883868	0.004077435	0.108801365	-0.14766383	-0.025785685	-0.03369522
"31308_at"	-0.1643796	0.16077471	0.35155678	0.05414629	0.015905857	0.271513	-0.15234804
"31309_r_at"	0.5209701	0.41980028	0.49287295	-0.06684518	0.33162856	0.5258398	0.04372239
"31310_at"	0.069462776	0.003413677	0.052705288	0.1581521	-0.034371376	0.09282398	-0.23119497
"31311_at"	0.00622797	-0.020590782	0.01683569	0.19082451	-0.108288765	-0.023084164	-0.09234381
"31312_at"	0.080905914	0.23048306	-0.033922672	0.025012016	0.08394003	-0.17385197	-0.068107605
"31313_at"	0.113891125	-0.025847912	0.3082075	0.06405258	-0.07682276	-0.24274445	-0.23797178
"31314_at"	0.08976412	-0.08644295	0.06507158	0.18618965	-0.13760424	-0.10036039	-0.21459675
"31315_at"	1.1181822	0.22685719	0.14480305	-0.005446911	-0.13320112	0.0658803	-0.17605925
"31316_at"	0.06289697	0.044414043	0.078807354	-0.11647344	-0.038675785	-0.014296532	-0.16517138
"31317_r_at"	0.07487488	0.22910833	-0.1406517	-0.065855026	0.03561926	-0.024178028	-0.09355736
"31318_at"	0.028619051	8.01E-04	0.056722164	-8.01E-04	-0.1010561	0.17311502	-0.009682417
"31319_at"	0.32749176	0.18754816	0.34025288	0.00345993	0.14336443	0.10174751	-0.17382526
"31320_at"	0.18825531	0.25246048	0.019682884	0.014082909	0.071689606	0.06827831	-0.014082909
"31321_at"	0.3026271	0.24735546	0.19129133	0.24009943	-0.045220852	-0.08319521	-0.16647673
"31322_at"	0.12240076	0.11070156	0.32936335	0.017195225	0.19729948	-0.02317667	-0.019102097
"31323_r_at"	0.35166168	0.59500504	0.34648418	3.24E-05	0.1770916	0.42236328	-0.028900146
"31324_at"	6.80E-04	-0.26586723	-0.06954336	0.013530731	0.15393257	-0.006143093	-0.10616779
"31325_at"	0.20043182	0.36424398	0.14686203	-0.002724648	0.07945347	-0.033932686	-0.077568054
"31326_at"	-0.001665115	0.184618	0.100743294	0.001665115	0.025500298	-0.21380997	-0.17097569
"31327_at"	0.32668972	0.20373535	0.47772503	0.018814564	-0.023890734	0.4120965	0.031568527
"31328_at"	0.011668682	0.22860527	0.27199697	-0.011668682	0.017584324	-0.01621294	-0.16929483
"31329_at"	0.2720635	0.26023746	-0.013907194	0.25033903	0.019020319	0.17156005	0.013907194
"31330_at"	-0.13626957	-0.11784649	0.7229891	-0.3164854	0.28797722	0.23044682	0.021204948
"31331_at"	-0.07983923	0.030564785	-0.008172512	-0.11469555	-0.07560086	-0.15477037	-0.045227528
"31332_at"	0.025764227	0.1359055	-0.059329033	0.10261536	-0.09608531	0.09237552	-0.15431118
"31333_at"	0.060580254	-0.040867805	0.16004658	0.098773	0.04991722	0.23393202	-0.0644784
"31334_at"	0.27739	0.15816545	0.055009842	-0.00220108	0.00220108	-0.002520561	-0.117869854
"31335_at"	0.12982082	0.2044549	0.12789583	0.014731884	-0.06764984	-0.028544426	-0.014731407
"31336_at"	0.2806282	0.2685709	0.34729552	-0.017081976	0.16322899	0.16443372	-0.12884521
"31337_at"	0.12276602	0.26564217	0.03021717	0.07732344	0.04395199	-0.002621651	-0.20917034
"31338_at"	-0.040674448	-0.04796934	0.041561842	-0.011052847	-0.068223715	0.2722051	-0.03863001
"31339_at"	0.38488865	0.24548483	0.43356895	0.009371281	0.11692381	0.28833723	-0.009467125
"31340_at"	0.28709602	0.18393421	0.0966115	0.038752556	0.16159248	-0.062081814	-0.15235281
"31341_at"	0.33020926	0.3210745	0.38433218	0.17082024	-0.02413702	-0.007302284	-0.22825384
"31342_at"	0.30835247	0.22440338	0.22083807	0.008831024	-0.008831024	0.22804499	-0.01864481
"31343_at"	-0.005567074	0.2714591	0.10631943	0.1152699	0.34066367	0.42004633	0.15830135
"31344_at"	0.23945475	0.2641759	0.21024895	0.007289887	0.07425308	0.3344264	-0.17826748
"31345_at"	0.20355034	0.36969328	0.38099575	0.26830292	-0.029841423	0.029841423	-0.06429529
"31346_at"	0.26517534	0.38292885	0.30146933	0.05466938	0.06876469	0.15290642	-0.15345716
"31347_at"	0.11778641	0.14039183	-0.22490358	0.004449844	0.026129246	0.10690498	-0.20322275
"31348_at"	0.22714329	-0.049768925	0.094724655	0.16616249	0.0909729	0.1032176	-0.23959684
"31349_at"	0.13457966	0.24357414	0.021332264	0.001734734	0.07252598	0.078248024	-0.2504964
"31350_at"	-0.017064571	0.08407736	-0.07379007	-0.11843252	0.017064095	-0.3299203	-0.09828615
"31351_at"	0.03170538	0.14785671	0.13749027	0.07773304	-0.11531925	-0.011108398	-0.2574792
"31352_at"	0.07496977	0.041994095	0.11140299	0.11248779	-0.113639355	-0.22134018	-0.093325615
"31353_f_at"	0.08196211	0.003795624	-0.1416769	0.1428132	-0.02742052	-0.07412052	-0.103191376
"31354_r_at"	0.44666815	0.34640646	0.38088417	0.120536804	0.046027184	0.28472233	-0.046027184
"31355_at"	0.15891981	-0.0588789	0.13881397	-0.024064064	0.19916344	0.01273346	-0.1945715
"31356_at"	0.17447281	0.05991745	-0.01350069	-0.15964746	0.107453346	-0.009190083	-0.07382488
"31357_at"	0.3690791	0.17878151	0.28167868	0.32232523	-0.13751602	-0.02363205	-0.14091444
"31358_at"	0.032333374	0.06661081	0.26665354	-0.017679691	0.020107746	-0.109835625	-0.08664799
"31359_at"	0.2582116	0.04423046	0.016825676	0.06305003	-0.033009052	0.13798165	-0.09694028
"31360_at"	-0.007869244	0.06016636	-0.004084587	0.0650959	-0.006963253	0.010868549	0.004084587
"31361_at"	0.15758228	0.09992695	0.36411047	0.22143888	-0.1346097	0.16128063	-0.2333579
"31362_at"	-0.011926174	0.016538143	0.105529785	0.011926174	0.01867199	-0.1946106	-0.1552124
"31363_at"	0.21713638	0.13036633	0.0697031	0.1156621	-0.053891182	-0.004320145	-0.22977304
"31364_i_at"	0.5518017	0.5887718	0.7709341	0.0691309	0.25225163	0.6508703	-0.0691309
"31365_f_at"	0.15043497	-0.006637096	0.39381933	-0.016625404	0.006637096	0.012363434	0.025717258
"31366_at"	0.2781682	0.18248653	0.2122078	0.04578495	-0.05541277	0.23400688	-0.029473305
"31367_at"	0.10602188	-0.007093906	0.22964716	0.10961437	-0.042194843	-0.17663097	-0.09083605
"31368_at"	-0.07600212	-0.21289015	-0.059907436	0.050008297	0.07796335	-0.21126318	-0.16460514
"31369_at"	0.24543333	0.15818691	-0.06848383	-0.006133556	-0.1999588	-0.028475285	0.03964758
"31370_at"	0.13613462	0.069655895	-0.07687664	0.04676342	0.03181982	0.31679916	-0.09789562
"31371_at"	0.25638914	-0.09458256	0.49376678	0.05770588	0.10111189	0.15259838	-0.04402542
"31372_at"	0.003331184	0.15322018	0.086535454	0.24423122	0.039517403	-0.083221436	-0.12588978
"31373_at"	0.33818483	0.11680174	0.14940977	0.08380318	-0.10894823	-0.18998575	-0.20521021
"31374_at"	0.3838067	0.26890755	0.56004286	0.05995083	0.026978493	0.17040443	-0.02697897
"31375_at"	0.14791918	0.27020645	0.24249649	-0.009697437	0.20607376	0.29400063	-0.109277725
"31376_at"	0.23756075	0.6411247	0.67673683	-0.002066612	0.002066612	0.42692614	-0.007176876
"31377_r_at"	0.019629002	0.07970905	-0.16133928	0.19671917	0.020201683	0.16195726	-0.17274809
"31378_at"	0.18872309	0.21308756	0.36352873	0.04917097	-0.19429398	-0.04917097	-0.09177256
"31379_at"	-0.018970013	0.20960808	0.17732954	0.046353817	-0.10919571	0.137043	-0.03848028
"31380_at"	0.04262829	0.12984467	0.2193675	0.007915497	-0.07812977	-0.07765627	-0.071397305
"31381_at"	0.44389582	0.28888988	0.5021739	0.089197636	-0.022549152	0.22234964	-0.116113186
"31382_f_at"	-0.036534786	0.3307786	-0.03303957	-0.03647566	0.20822811	0.25549936	0.16345263
"31383_at"	0.22952509	0.10734177	0.1596744	0.06196308	0.09369874	0.23631287	-0.17628884
"31384_at"	0.09560585	0.06151533	0.18138647	0.118142605	-0.055277348	-0.15685558	-0.20580196
"31385_at"	-0.20084763	0.44547176	0.5603628	-0.17559052	-0.24514961	-0.053432465	0.05343151
"31386_at"	0.18320465	0.21980953	0.08570099	-0.007772446	0.12571049	0.024092674	-0.19229507
"31387_at"	0.18227053	0.061546803	0.25766897	0.25269938	-4.05E-04	-0.001753807	-0.2362442
"31388_at"	0.013763428	0.1353836	0.117901325	0.19026399	0.005572557	-0.10469556	-0.20572686
"31389_at"	0.17427206	0.073691845	0.11503506	0.002621651	0.17677689	0.17661238	-0.21483517
"31390_at"	-0.006771088	-0.26938868	-0.019248962	0.2862773	0.10084772	-0.11442232	-0.031057358
"31391_at"	0.20768929	0.020501137	0.044549942	0.13889408	-0.13224316	-0.14297104	-0.21878147
"31392_r_at"	0.26954603	0.27953815	0.20508099	-3.19E-04	-0.24589682	-0.21568489	-0.08095026
"31393_r_at"	0.097249985	0.10919094	0.083031654	0.06221676	-0.24744797	-0.19837189	-0.12473297
"31394_at"	0.13142443	0.09208155	0.13258934	0.018120766	-0.001741886	-0.14555836	0.001741886
"31395_i_at"	-0.08020401	0.05675888	0.07537174	-0.00763607	-0.11724758	-0.2826953	0.16666937
"31396_r_at"	0.2712593	0.24032307	0.02941227	-8.36E-04	-0.0893383	-0.07964802	-0.12869549
"31397_at"	-0.06605315	-0.29978514	0.26593208	0.030878067	-0.294065	0.36121845	0.02939248
"31398_at"	0.3042736	0.35840225	0.048102856	-0.028931618	0.028931618	0.13355064	-0.085562706
"31399_at"	0.15455866	0.2365613	0.24979496	0.124035835	0.15455103	-0.036413193	-0.12857533
"313_at"	-0.085645676	0.10095644	-0.05704689	-0.045853138	0.18209267	0.12403822	-0.03458643
"31400_at"	0.013271093	-0.06956744	-0.30923915	0.043798685	-0.23625088	-0.013271093	0.0605402
"31401_r_at"	0.20503616	0.16696572	0.19468355	-0.12677622	0.1697061	0.007221699	-0.007221699
"31402_at"	0.077037334	-0.033429623	0.06381464	-0.18331194	0.01265049	0.025165558	-0.08537197
"31403_at"	-0.14471626	-0.04680538	-0.18370056	-0.027309418	-0.075562954	-0.3620398	0.027309418
"31404_at"	0.1265316	0.13595676	-0.036338806	0.024673462	0.053920746	0.18876362	-0.24301529
"31405_at"	-0.06168604	0.10921192	-0.010370731	0.16610861	0.018144608	0.010370731	-0.105336666
"31406_at"	-0.02230835	3.60E-04	0.20980167	-0.04518795	0.18115711	0.015872955	-0.043706894
"31407_at"	0.12014818	-0.037148237	0.18477488	0.036649942	0.13481236	0.25889277	-0.039814234
"31408_at"	-0.03796625	0.048666477	0.265059	0.18575478	-0.27314997	-0.18629026	0.006993294
"31409_at"	0.09682441	0.12850404	-0.028537035	-0.06267142	0.08046198	0.11340952	-0.07449198
"31410_at"	0.16978073	0.19446945	-0.1612134	0.019528866	0.11771107	0.056962967	-0.13580942
"31411_at"	0.050868988	0.1619544	0.18916225	0.07226753	-0.032385826	0.011113644	-0.13120556
"31412_at"	0.25918245	0.2600317	0.18973827	0.1868782	0.013623714	-0.017122746	-0.083631516
"31413_at"	0.080791	0.034615517	-0.15343666	0.12357426	0.062436104	0.014716148	-0.14033842
"31414_at"	-0.054769516	0.27304316	-0.0263834	0.20376492	-0.19060564	-0.058784008	-0.11161709
"31415_at"	0.37897754	0.22838974	0.12496805	-0.010637045	-0.14623165	-0.017935991	0.00191617
"31416_at"	0.29569864	-0.16951656	-0.00955677	0.10339117	-0.008747578	-0.19780564	-0.04662919
"31417_at"	-0.02102375	0.06823921	0.14285374	0.13282633	0.113073826	0.15142536	-0.026279926
"31418_at"	0.06568241	0.17594385	0.09895325	0.087990284	-0.019400597	-0.04569578	-0.17909002
"31419_r_at"	0.19941998	0.16256142	0.01734066	0.08734989	-0.19852161	-0.19903278	-0.17946911
"31420_at"	0.32824802	0.088198185	0.5856457	0.25041246	0.07500315	0.57317066	-0.20940399
"31421_at"	0.27460718	0.38935328	0.2409749	0.14253855	-0.006182671	0.21823502	-0.12883806
"31422_at"	-0.015044689	-0.02055788	-0.04432726	-0.03061819	0.015044689	-0.18621445	-0.13573265
"31423_at"	0.03588295	0.20721436	0.034650803	-0.0708313	0.022996902	-0.2241869	-0.048114777
"31424_at"	-0.0147295	0.006900787	0.005519867	0.07218647	-0.005918503	-0.034067154	-0.1431942
"31425_g_at"	0.014490128	0.12852621	-0.018953323	-0.00915432	0.018711567	0.009153843	0.032087803
"31426_at"	-0.100152016	0.099843025	-0.08179474	0.007618904	0.06369686	-0.12777853	-0.08766079
"31427_at"	-0.023817062	-0.17047882	0.08475542	-0.014356613	0.014356613	-0.014959335	0.12743092
"31428_at"	0.28234053	0.1945138	0.04638052	0.054240704	0.14695883	-0.098097324	-0.056428432
"31429_at"	0.26064968	0.11663103	0.23210287	0.033592224	0.18885088	0.3102455	-0.108887196
"31430_at"	0.21290302	0.075647354	-0.03887844	0.04397106	0.06781769	0.18144178	-0.19175673
"31431_at"	0.035428047	-0.09818268	-0.10877037	0.041049957	0.10581207	-0.005695343	0.15173244
"31432_g_at"	0.019516945	-0.64701605	-0.21977997	-0.069083214	0.07128811	0.058163643	0.4774561
"31433_at"	-0.09091425	0.08355045	0.27435064	0.18692303	-0.0676465	-0.33224106	-0.13098812
"31434_at"	-0.21901417	-0.050430775	-0.09489298	0.033964157	0.067584515	-0.20569324	-0.15721273
"31435_at"	0.12076759	0.2602284	-0.016765833	-3.65E-04	-0.002495766	-0.15225601	-0.10334706
"31436_s_at"	0.047427177	0.025694847	0.2731204	-0.007691383	-0.26442719	0.007691383	-0.1132679
"31437_r_at"	0.13224554	0.14202547	0.32706785	-0.07694149	0.13659525	-0.17305708	0.014261246
"31438_s_at"	0.1806488	0.12260389	-0.017301083	-0.1980424	-0.01933384	-0.43898392	0.017301083
"31439_f_at"	0.14034748	0.01809597	0.11636543	0.2970028	-0.0494833	-0.111803055	-0.10279369
"31440_at"	0.004597664	0.20128918	0.002142906	0.07403469	-0.0386858	-0.22747421	-0.12949085
"31441_at"	0.09698486	0.302042	0.43439627	0.13451147	-0.0277071	0.081421375	-0.33818674
"31442_at"	0.44150114	0.29395962	0.19968367	0.05270481	0.23446321	-0.0828619	-0.23512888
"31443_at"	-0.021576881	0.2409153	-0.0605402	0.083372116	0.18315935	-0.17613077	-0.28614426
"31444_s_at"	-0.032102585	0.16155434	-0.3620062	-0.87129307	0.8722992	-0.4604559	0.12457657
"31445_at"	0.19511461	0.35070086	0.19980288	0.009827137	-0.04983759	0.12704039	-0.009827137
"31446_s_at"	0.11531353	-0.022959232	-0.050918102	-0.005969048	0.21715641	0.06417751	-0.001320362
"31447_at"	-0.2085309	0.003959179	0.006042004	-0.023177147	-0.02388668	-0.13184023	-0.067299366
"31448_s_at"	0.43835068	0.2204709	0.29827785	0.032764435	0.06149912	0.61894083	-0.032764435
"31449_at"	0.28027916	0.1856165	0.27542686	0.2495246	-0.024228096	0.10050535	-0.27965307
"31450_s_at"	0.021675587	-0.011875153	-0.17614508	0.32478285	-0.07823086	-0.01562643	-0.1182642
"31451_at"	0.13536453	0.13983822	0.011786461	4.74E-04	0.019059181	0.015835762	-0.34191132
"31452_at"	0.001105785	0.22351313	0.09530735	-0.004767418	-0.13357735	0.015354633	0.02456808
"31453_s_at"	0.46275234	0.1936307	0.41901875	0.0539546	0.007648468	0.019703388	-0.10944128
"31454_f_at"	0.3180871	0.10457039	0.03249502	-0.039580345	-0.03249502	0.13094139	-0.16741705
"31455_r_at"	0.02208352	0.32535648	-0.07781649	-0.11547232	0.018867016	0.08105636	0.10978913
"31456_at"	0.40538454	0.117358685	0.31318474	0.16306067	0.09536457	0.39667416	-0.121807575
"31457_at"	0.08797073	0.18748474	0.2574215	0.060770035	-0.009168625	0.115942955	-0.046562195
"31458_at"	0.022941113	0.057402134	-0.08463907	-0.020908833	-0.012047291	-0.19396782	-0.014406204
"31459_i_at"	0.062348127	0.15704584	0.16285801	-0.17375708	0.2822554	0.02048564	-0.06124878
"31460_f_at"	0.62970066	-0.010327339	0.1427617	0.1030674	0.026542664	0.11662817	-0.12567711
"31461_at"	0.021632195	0.05090189	-0.12571049	0.09647989	-0.23457575	-0.33389854	-0.14304924
"31462_f_at"	0.6181698	0.37241697	0.48947906	0.00330925	-0.01675415	0.3932395	-0.00330925
"31463_s_at"	0.003955841	0.017156601	-0.003955841	0.13234043	0.0262537	-0.078035355	0.02234459
"31464_at"	-0.015943289	0.23001194	3.99E-04	-0.11423087	0.00456667	-3.99E-04	-0.1627965
"31465_g_at"	0.24595499	0.26843548	-0.027017593	-0.03313589	0.01052618	0.36237288	-0.01052618
"31466_at"	0.20479774	0.3833003	0.30397224	0.033604145	0.19041586	0.32623243	-0.18967676
"31467_at"	0.2055788	0.2711401	0.067606926	0.026229858	0.00887394	0.15159416	-0.095267296
"31468_f_at"	0.25938845	0.17694473	0.11721516	0.01670742	0.17234612	0.11943197	-0.07552147
"31469_s_at"	0.5132723	0.18523884	0.6015811	0.058339596	-0.046664238	0.3334279	-0.16230726
"31470_at"	0.001078129	0.07324505	0.17583847	0.006247759	0.038259983	0.07503271	-0.1003356
"31471_at"	0.113214016	0.13909674	0.04167509	-0.08448696	-0.037080288	-0.08483839	-0.16306448
"31472_s_at"	0.23516417	0.44709015	0.048327923	-0.048327923	0.34597778	0.06594992	-0.33188772
"31473_s_at"	0.22826958	0.08288121	0.2103734	0.06270671	-0.13082623	0.18227577	0.021968365
"31474_r_at"	-0.16714716	0.29647636	0.023021698	0.04569578	0.059890747	-0.08080912	-0.33070898
"31475_at"	-0.06512213	0.059356213	-0.18329906	-0.14880419	-0.008425236	0.008425236	-0.10165405
"31476_g_at"	0.25136948	-0.05901575	0.07990408	0.0421834	0.09402466	0.02167797	-0.09381151
"31477_at"	-0.01641512	-0.024971008	0.07882309	0.032508373	-0.102609634	-0.09821367	-0.121901035
"31478_at"	-0.016870499	0.057676792	-0.06497908	0.013478756	0.005755901	-0.16079283	-0.14056396
"31479_f_at"	0.08466339	0.07250452	0.075493336	9.26E-04	-0.12748098	0.00813961	-0.14423466
"31480_f_at"	0.610909	0.20960283	0.008165598	-0.099345446	0.1361885	0.051715374	-0.094594
"31481_s_at"	-0.004962921	-0.58550835	-0.7408018	-0.6655483	0.80286026	-0.033950806	0.5361786
"31482_at"	-0.021618843	0.040190697	0.18680573	-0.21322536	0.10128403	0.71087265	0.008254051
"31483_g_at"	-0.17600632	-0.18103361	-0.12624264	0.12624216	0.28049135	1.5309811	0.9642587
"31484_at"	0.3285675	0.08453941	0.031323433	0.2040577	-0.28034496	-0.12350178	-0.2450571
"31485_at"	0.1181221	-0.07923651	-0.006269455	0.036761284	-0.082838535	-0.14675236	-0.024497509
"31486_s_at"	-0.05195141	0.017024517	0.42007923	0.04023838	-0.002726078	0.02189207	-0.09982538
"31487_at"	-0.048906803	0.10259342	0.027066708	0.09399271	0.07068825	-0.17724562	-0.07505083
"31488_s_at"	0.43166018	-0.8327713	-0.04562235	0.20081139	0.07453728	-0.6297374	-0.020411968
"31489_at"	-0.024044514	-0.06546879	0.035611868	0.08464885	0.060657978	0.30117917	-0.13220644
"31490_at"	0.06880331	-0.07659435	0.24431944	0.06582594	0.008682728	-0.24488068	-0.13801861
"31491_s_at"	0.66321373	0.5820317	0.56492186	0.037662506	0.40057564	0.5771313	-0.037662506
"31492_at"	-0.26981735	0.28838634	0.330081	-0.22806835	-0.02934742	-0.017388344	-0.046657562
"31493_s_at"	0.016551495	-0.12479019	-0.15087795	-0.13976955	2.1713357	1.8778591	1.6549544
"31494_at"	0.065378904	0.43951488	0.16143274	0.12617445	4.41E-04	0.46487236	-4.41E-04
"31495_at"	0.38065243	0.15569639	0.11650896	0.013744831	-0.036977768	-0.013745308	-0.14665413
"31496_g_at"	0.10227156	0.18556786	-0.066970825	0.03346157	0.025634289	-0.008834839	-0.10463095
"31497_at"	0.27261877	0.060106754	0.045238018	0.09492588	-0.45590258	-0.20462894	-0.1967082
"31498_f_at"	0.18543625	0.11634302	-0.20250225	0.051308632	-0.001818657	-0.1584692	-0.04367447
"31499_s_at"	-0.005325794	0.2669034	0.023463726	0.106630325	-0.06180954	-0.038522243	-0.12268829
"314_at"	0.003413677	-0.15311098	-0.03501177	-0.015769005	-0.13356638	-0.49143076	0.20684052
"31500_at"	-0.1364665	0.09712267	-0.25780678	-0.32611513	0.09732962	-0.2180233	-0.18720818
"31501_at"	0.41090822	0.25925493	0.3515606	-0.008704186	0.3129506	0.45212603	-0.084430695
"31502_at"	-0.01365757	-0.005234242	0.21957493	0.06441355	0.005234718	0.07567644	-0.17747593
"31503_at"	0.08325195	-0.18028831	0.042363167	0.15205574	-0.20019817	-0.52642107	-0.034360886
"31504_at"	-0.14495659	0.23391819	0.25186825	0.10521412	-0.020936012	-0.42968702	0.020936012
"31505_at"	-0.6278944	-0.263484	0.015725136	0.08975315	-0.015725136	0.11188412	0.01940155
"31506_s_at"	0.017543316	-0.017543316	-0.051056385	-0.14084864	-0.10359478	4.6919184	0.376904
"31507_at"	0.20341682	0.18445015	0.51023483	0.0879426	-0.044136524	0.11082649	-0.024984837
"31508_at"	0.014288902	-0.9142437	-0.30879974	0.46868134	0.14670181	-0.37431526	0.5508232
"31509_at"	-0.425745	0.17994404	0.26816654	-0.042490005	0.1689272	0.34239388	0.042490005
"31510_s_at"	-0.84369993	-1.5249939	-0.746685	-0.051150322	0.22139645	-0.4139862	0.46085453
"31511_at"	-0.35858822	-0.062412262	0.49240494	-0.09429455	-0.020228386	0.1170454	0.16382122
"31512_at"	0.061518192	0.009287357	-0.11991501	0.029687881	0.20320797	-0.003629684	0.003629684
"31513_at"	0.12070465	0.004869938	0.16689348	0.103176594	-0.17600393	-0.03380108	-0.20869112
"31514_at"	0.19183826	0.28114033	0.068190575	0.09713745	-0.09145498	0.12634182	-0.28411198
"31515_at"	0.24797487	0.15823364	0.11265373	0.13871193	-0.067750454	-0.067998886	0.014042378
"31516_f_at"	0.0593071	0.28764343	-0.07940149	0.2789998	-0.09847069	0.3146844	-0.076210976
"31517_f_at"	0.3248825	-0.04751253	0.43085432	0.1916871	0.03529644	0.1179986	-0.24457026
"31518_i_at"	0.3527007	0.10068512	0.11486721	0.13193512	-0.07281017	0.17159128	-0.08249092
"31519_f_at"	-0.15905476	-0.006658554	-0.17281485	0.006658554	0.24985266	0.088968754	-0.020326614
"31520_at"	0.06899357	0.31605148	0.072194576	-0.003396988	0.093272686	-0.04493904	-0.27951097
"31521_f_at"	0.18836641	0.05408573	0.022737503	-0.06879091	0.053599358	0.57445335	-0.37400675
"31522_f_at"	-0.19591904	-0.19735384	0.42724752	0.19684362	0.24350405	-0.017781734	-0.17232752
"31523_f_at"	0.14094067	-0.14249086	0.71305656	0.025467396	0.23164272	0.02067089	-0.02067089
"31524_f_at"	0.13242197	-0.08647776	0.4743123	0.17815876	0.3224516	0.057010174	-0.25765514
"31525_s_at"	-2.0957775	-0.062412262	-1.2234936	-0.8263874	0.48317242	1.6423874	0.431962
"31526_f_at"	-0.6337943	-0.9415736	-1.1199279	0.17823601	0.20789576	-0.06439018	0.2620263
"31527_at"	-0.065161705	0.050102234	0.4026451	0.14274025	0.11981392	-0.046815872	-0.17366982
"31528_f_at"	-0.06889105	0.012974739	0.75381756	0.19834471	0.23402596	-0.012975216	-0.19842434
"31529_at"	0.18349457	0.10081816	0.13864326	-0.07857847	0.088023186	-0.12257671	-0.21841335
"31530_at"	-0.002919197	0.10863447	0.05802822	0.11316633	0.053448677	0.026651382	-0.35657072
"31531_g_at"	0.22763062	0.24415588	0.12457991	0.047486305	0.045805454	0.15452957	-0.11428499
"31532_at"	0.08658314	-0.06814957	0.06453705	0.12087631	-0.01268959	-0.2821827	-0.20517159
"31533_s_at"	0.1901164	0.27785635	0.14117098	-0.015861034	0.15548658	0.06675148	-0.1281004
"31534_at"	-0.093036175	-0.035850048	-0.010759831	0.12067938	-0.2512722	-0.39255667	-0.19795752
"31535_i_at"	-0.071045876	0.09479523	-0.46939564	-0.020743847	0.020743847	0.087628365	-0.2122798
"31536_at"	0.4570284	-0.66184425	-0.23537827	0.31535912	-0.1282425	-0.4195757	0.046619415
"31537_at"	0.015834808	-4.12E-04	0.14707613	-0.026427746	0.07242012	0.035059452	4.12E-04
"31538_at"	-0.7973099	-0.26502895	0.37307167	0.17777824	0.2645893	-0.2526512	-0.003164291
"31539_r_at"	0.055107832	0.12838316	-0.117541075	0.019651175	-0.06644297	-0.00689292	0.006893158
"31540_at"	0.11093664	0.22911692	0.1055305	0.016039133	-0.062251806	0.100844145	-0.13322163
"31541_at"	0.29911423	0.18012619	0.31874466	-0.077124596	-0.034964085	0.07972336	-0.11847973
"31542_at"	0.46752357	0.042158604	0.33099937	0.2297492	0.05182004	0.030935526	-0.030935764
"31543_at"	-0.15945292	0.08167648	-0.27542448	0.030834198	-0.16254616	-0.24903727	-0.17700243
"31544_at"	0.004784107	0.096315384	0.03656149	-0.004173756	-0.024802685	-0.12413645	-0.10007191
"31545_at"	-0.26034546	-0.4342785	0.54393864	-0.2217884	0.29578876	0.09468746	0.13095379
"31546_at"	-0.64717007	-0.010940552	0.52744675	-0.2105093	0.0559597	-0.09210396	0.0355196
"31547_at"	0.13953447	0.24114513	-0.010142803	-0.04415226	-0.013377667	0.3138647	0.020148277
"31548_at"	0.07460022	0.23341656	0.17352295	-0.036884308	-0.07125759	0.22518206	-0.033203125
"31549_at"	0.11275339	0.3592167	0.24378538	0.001325131	-0.22329998	-0.25293398	-0.048345566
"31550_at"	0.0820322	0.13190317	-0.03125906	0.13401031	0.029875755	-0.017925262	-0.005747318
"31551_at"	0.081834316	0.29718828	0.21113157	0.029065609	-0.05835724	0.08336878	-0.17327785
"31552_at"	0.11451912	0.06625414	0.4037094	0.43516636	-0.04851365	-0.059445143	-0.08733845
"31553_at"	0.32327604	0.010283947	0.16536522	0.053465843	-0.17986536	-0.30134106	0.09043169
"31554_at"	0.17196035	-9.30E-05	9.30E-05	0.20169449	0.005493641	-0.010813713	-0.12683058
"31555_at"	0.15144587	-0.013659477	0.13693571	-0.03857279	-0.007918835	0.039781094	-0.16755438
"31556_at"	-2.52E-04	0.3350811	0.003057957	-0.083768845	-0.20612764	2.52E-04	-0.008835316
"31557_at"	0.14575768	-0.13508797	-0.7226105	-0.114310265	0.33870888	-0.37153912	0.18641186
"31558_at"	-0.010863781	0.23012495	0.5118761	0.1817007	-8.48E-04	-0.011885643	-0.20199347
"31559_at"	0.14334774	0.10593891	0.050372124	0.007305145	-0.034780502	-0.045500755	-0.12268734
"31560_at"	0.04573345	-0.16627884	0.11578894	-0.04573345	0.058340073	-0.09530878	-0.12379694
"31561_at"	0.19416714	0.22041655	0.006560326	0.07811403	0.1683774	-0.00875473	-0.28332138
"31562_at"	0.13662577	0.19995213	0.09878588	0.055769444	0.075653076	0.33866644	-0.2123642
"31563_at"	-0.007406235	0.03008318	0.008509159	0.13986063	0.00180006	-0.19523	0.012158394
"31564_at"	0.14364433	0.19928741	0.096918106	0.06983948	0.002504826	-0.08139753	-0.15734482
"31565_at"	0.077913284	-0.04518318	0.007362843	0.020972729	-0.055834293	-0.12786484	-0.007362843
"31566_at"	0.004466057	0.089357376	-0.20207453	-0.034720898	0.064866066	-0.24556923	-0.12807512
"31567_at"	0.054493904	-0.023813725	-0.025413036	0.056379795	-0.07927275	-0.33837843	-0.044991016
"31568_at"	-0.22710991	-0.19098663	0.4814434	-0.016718864	0.124331474	0.2011137	0.05386448
"31569_at"	0.09725809	0.32189083	0.13946342	0.097063065	0.010635376	0.15262794	-0.16266441
"31570_at"	0.22042608	0.011918068	-0.08057761	0.10356903	0.077893734	0.01601553	-0.08536267
"31571_at"	0.29128408	0.3493955	-2.49E-04	0.08684158	0.39232183	0.660861	-0.06314039
"31572_at"	0.28319168	0.16065645	0.08823395	-0.017086983	0.17413378	0.15808249	-0.013267994
"31573_at"	-0.97665787	-0.2930975	-0.6064215	-0.07038021	0.5945282	0.5113659	0.26223087
"31574_i_at"	0.46468353	0.25789213	0.6280298	0.100055695	0.16424179	0.42454195	-0.100055695
"31575_f_at"	0.15946913	0.14870644	0.1959734	0.17204618	-0.027249813	0.19060326	-0.20659685
"31576_at"	0.011479378	-0.011479378	0.11893177	0.09105873	-0.069282055	-0.1287098	-0.07282829
"31577_at"	0.16608953	0.4025874	-0.016679287	-0.032001972	0.44994736	0.17576933	-0.121171
"31578_at"	0.09287834	-0.08819485	0.08997202	0.08418894	-0.05892372	0.035078526	0.013286114
"31579_at"	0.0606122	-0.016448498	0.21806574	0.050965786	-0.006551743	-0.22030783	-0.17961168
"31580_at"	0.013124466	-0.013124466	-0.10984802	-0.15152407	-0.12659597	-0.065571785	-0.08112717
"31581_at"	0.2748983	0.028790712	-0.005316258	0.06380057	0.013239145	-0.003018379	-0.12898159
"31582_at"	0.07762289	0.15992641	0.33521366	-0.11677837	-0.08157635	0.003938675	0.029972076
"31583_at"	-0.23364067	-0.8212881	-0.047851562	0.09519768	0.27171993	0.32519722	0.18096733
"31584_at"	-0.67506313	-0.5966253	-0.094044685	-0.06736851	0.49035168	0.06736851	0.2460289
"31585_at"	0.005892754	0.17921686	0.2068572	0.030320168	-0.00589323	0.08297634	-0.095286846
"31586_f_at"	0.5320854	0.22362852	0.24720812	-0.090818405	0.16614676	0.66352415	-0.09188366
"31587_at"	-0.16843367	0.2911067	-0.27436876	-0.1612339	-0.1254878	-0.28064966	0.003047466
"31588_at"	-0.025722504	-0.026019335	0.009580135	-0.12726688	-0.08765674	-0.19869137	0.045306444
"31589_at"	0.5521264	0.48017406	0.56305456	0.004171848	0.15064192	0.33136415	-0.004171372
"31590_g_at"	0.16365051	0.19141483	-0.001030922	0.014172554	0.001030922	-0.02713108	-0.0692606
"31591_s_at"	0.04637146	0.21232796	0.101706505	-0.004183769	0.004183769	0.18629074	-0.16114569
"31592_at"	0.20134163	0.13829613	0.17971897	0.035438538	-0.05183363	0.14729404	-0.101686954
"31593_at"	0.40569305	0.086883545	0.029437065	0.16982555	-0.029436588	-0.12788773	-0.08761692
"31594_at"	-0.1003561	-0.115223885	0.057312965	0.004424095	0.10558605	-0.02974987	0.012770653
"31595_at"	0.14075708	0.21862268	0.35642147	-0.013449192	-0.14793205	0.25191975	-0.12844181
"31596_f_at"	-0.02831173	0.08152866	-0.03483677	0.048607826	-0.16270924	-0.23265553	-0.014789581
"31597_r_at"	0.37280464	0.2012062	0.27827644	0.18385887	-0.02404213	-0.004502296	-0.15894699
"31598_s_at"	0.30670834	0.14665985	0.51404476	0.011816502	0.23085356	-0.035581112	-0.1443367
"31599_f_at"	0.84488916	-0.16432905	0.08587694	0.14053869	0.11455679	-0.010938644	-0.2736349
"315_at"	0.15437317	-0.14050245	-0.38153887	-0.014029503	0.014029503	-0.08627415	0.12027931
"31600_s_at"	-0.55959034	-0.1960268	-0.092372894	0.0422678	-0.5997405	0.6158118	0.35057402
"31601_s_at"	0.22069073	0.42963934	0.437541	0.01161623	0.04842758	0.07388306	-0.29279327
"31602_at"	0.32278585	0.3782096	0.34850645	0.024264336	0.19490528	0.097438335	-0.15476465
"31603_at"	-0.18332958	0.28047514	-0.45535278	0.27346754	-0.053545	0.1162591	-0.15255785
"31604_at"	1.1637459	0.001981258	1.5382538	0.12371683	-0.10661888	-0.1254754	-0.10422373
"31605_at"	0.029925346	-0.044742107	0.15677786	-0.17997217	-0.43839264	-0.0066185	0.065514565
"31606_at"	-0.014543057	0.053831577	0.11333513	-0.034715176	-0.04781437	0.36243916	0.08258057
"31607_at"	-0.03133297	0.111590385	0.16530418	-0.00302124	0.20627737	0.17846012	-0.22650719
"31608_g_at"	0.14435291	-0.0698843	0.103066444	0.06988382	-0.27073956	-0.14967537	-0.26108027
"31609_s_at"	0.032785416	0.23827648	-0.19001865	-0.0378685	-0.13409233	-0.0992794	-0.014367104
"31610_at"	0.19587421	-0.019494057	0.21123886	0.05538702	0.046134472	-0.072995186	-0.13522005
"31611_s_at"	0.16640043	0.4622898	0.11084318	-0.09577227	0.005544663	0.18775892	-0.3248086
"31612_at"	0.46443844	0.07280493	0.25305605	-0.041561604	0.037797928	0.06867218	-0.011248112
"31613_at"	-0.056390047	0.25150347	-5.54E-04	5.54E-04	-0.02255392	0.055443764	-0.009228706
"31614_at"	0.14463758	0.006786346	0.21863079	0.26270628	-0.043744087	0.37243032	-0.040959835
"31615_i_at"	0.007375717	0.27476215	-0.01484251	-0.040385723	0.047144413	0.12030935	-0.20103407
"31616_r_at"	0.28903103	0.13895178	0.3730321	-0.06122017	-0.00209713	0.09802723	0.005915165
"31617_at"	-0.016461372	0.009450913	0.26907682	0.048200607	-0.122924805	-0.29823112	-0.08921766
"31618_at"	-0.045720577	-0.026117325	0.06186056	0.03310585	-0.060997486	-0.4715557	-0.08822441
"31619_at"	0.1489315	0.14465547	-0.021556616	0.22098327	-0.063174725	-0.036243916	-0.15605307
"31620_at"	0.19486094	0.38430595	-0.06422281	0.05575657	-0.00709343	-0.09717417	-0.10387087
"31621_s_at"	0.08440924	0.041288376	0.04336834	-0.06934118	0.18037796	0.15949774	-0.10330629
"31622_f_at"	-0.12793827	-0.1463108	-0.013321877	-0.17582607	0.7103758	0.019997597	0.25068188
"31623_f_at"	-0.12295532	-0.29626656	-0.016327858	-0.11346054	1.0600634	-0.01212883	0.39703083
"31624_at"	0.29864788	0.21844673	0.090483665	0.15298176	0.19261312	0.26090956	-0.16767836
"31625_at"	0.16512823	0.12630844	0.3559823	0.009178638	-0.14276886	-0.006971836	-0.09309006
"31626_i_at"	0.1349411	0.04783249	-0.08847332	-0.063547134	-0.008246422	-0.10008049	-0.019683838
"31627_f_at"	0.23703957	0.12810802	0.1016016	0.0876379	-0.034679413	0.034679413	-0.13204479
"31628_at"	-0.002365828	0.14754987	0.002365828	-0.100709915	-0.035569668	0.14198399	0.09380174
"31629_at"	0.5050678	0.6730161	0.14647532	-0.036171436	-0.088525295	0.051384926	0.010890484
"31630_at"	0.2088151	0.001092911	0.5618143	0.1348362	-0.001092911	0.21942139	-0.08156061
"31631_f_at"	0.18159246	-4.22E-04	0.10332465	0.18507338	-0.023062944	-0.00163579	-0.07663369
"31632_at"	0.29043818	-0.011183739	0.33474016	0.1629386	0.12773705	0.011183739	-0.17776346
"31633_g_at"	0.31826162	0.06752968	-0.054311752	0.00162077	-0.080227375	0.07655239	-0.051561356
"31634_at"	0.2202897	0.15166044	-0.0484581	-0.011992931	0.011992931	0.1474843	-0.064490795
"31635_g_at"	0.3653288	0.11756039	0.2324853	0.12740469	-0.007119179	0.37789774	-0.15664959
"31636_s_at"	-0.06599522	0.37207317	0.022110939	-0.006124497	0.051268578	-0.16858482	-0.053204536
"31637_s_at"	-0.30809975	-0.35660362	-0.28147507	-0.11280918	0.001594544	-0.31356335	0.06686211
"31638_at"	0.09183693	0.88589	0.038274765	0.00790596	-0.3349228	0.16214848	-0.026721
"31639_f_at"	0.33965254	0.2543993	0.6545038	0.003063202	-0.13797235	0.26623297	-0.15213203
"31640_r_at"	0.18677902	0.19794846	0.22815037	0.06598091	-0.05493641	0.17063141	-0.1138401
"31641_s_at"	-0.039718628	0.0958333	0.1654563	0.006063938	-0.021135807	0.20045996	-0.006063938
"31642_at"	-0.07047105	0.021648645	0.1387577	0.08053112	-0.32644773	-0.07420683	0.012205124
"31643_at"	-0.08997202	-0.02724123	0.11617613	-0.015281677	0.14471388	0.001180649	-0.18287897
"31644_at"	0.07443333	0.10583067	0.10530186	0.058520317	0.09843016	0.048009872	-0.17538834
"31645_at"	0.4682541	0.30662584	0.2270031	0.14408827	-0.042925835	0.21285868	-0.122982025
"31646_at"	0.05303049	-0.05303049	-0.23031807	-0.26010275	0.29787207	0.1146512	0.33821583
"31647_at"	0.006449223	0.35610437	0.3702221	0.01902771	0.18976068	-0.08835316	-0.1692524
"31648_at"	0.12631655	0.07492781	-0.014915466	0.18955135	-0.03221464	0.08676243	0.027901173
"31649_at"	-0.07238722	-0.26266646	0.21567917	0.31543446	0.10565281	0.3702979	0.026625395
"31650_g_at"	0.4271469	0.3274622	0.3351841	0.12955475	-0.019304752	0.16905642	-0.031864643
"31651_at"	0.19483113	0.19605851	0.34416032	0.122665405	0.13455033	-0.034407377	-0.054900646
"31652_at"	0.02895689	0.24822855	0.109791756	0.0393219	0.17998743	0.21847343	-0.2967162
"31653_at"	0.12798882	0.36234045	-0.002854347	-0.049218655	0.124604225	-0.014023781	-0.03921032
"31654_at"	0.3535118	-0.018405437	-0.11830187	0.018405437	0.033661842	-0.20627117	-0.06686211
"31655_at"	-0.1528101	-0.39267063	0.031408787	0.088124275	-0.049758434	-0.006532669	-0.019574165
"31656_at"	0.31462288	0.36738753	0.23661804	-0.07206535	-0.003642559	0.12097573	0.116793394
"31657_at"	0.027680635	0.33493137	0.024003983	0.15270638	0.03512931	0.29641533	-0.032895803
"31658_at"	0.08050108	0.050106525	0.24942446	0.061890125	-0.039823532	0.1354084	-0.096138
"31659_at"	0.012142181	0.0610528	0.08976793	-0.054568768	0.029884815	-0.05887699	-0.04278946
"31660_at"	0.2171402	0.2437253	0.2123518	-0.055256844	-0.056555748	0.043486595	-0.014992237
"31661_at"	-0.031014442	-0.03348875	0.003936291	-0.003936291	0.05807686	-0.08310795	-0.13168478
"31662_at"	0.10072994	0.15629482	0.013477325	0.002077103	0.05001545	0.27929974	-0.058193207
"31663_at"	0.27261734	0.2983389	0.19465828	0.03572178	0.111390114	0.00181675	-0.12574291
"31664_at"	0.39619398	0.63278484	0.33928013	0.062140465	0.007022858	0.22260523	-0.16529989
"31665_s_at"	-0.20638514	0.001689434	0.9494958	0.40124464	-0.3196411	-0.48165894	-0.035593987
"31666_f_at"	0.16374397	0.66383266	0.16212654	-0.31258583	0.1010375	0.27401447	-0.31182623
"31667_r_at"	0.34938717	0.48383808	0.36735725	0.001746178	-0.001746178	0.30183697	-0.03785515
"31668_f_at"	0.2143836	0.1768446	0.03645897	0.009734154	-0.09531927	0.031059742	-0.069334984
"31669_s_at"	0.13216734	0.18923712	0.057677746	-0.06888914	-0.08275986	0.13482618	-0.06363535
"31670_s_at"	-0.28016853	-0.3995533	0.09774637	-0.26093435	-0.15987396	-0.1268692	0.21153736
"31671_at"	0.29924774	0.2541647	-0.007586479	-0.014634132	0.18039894	-0.011193275	0.007586479
"31672_g_at"	0.35455322	0.32225418	0.043667316	-0.12579966	0.41610813	0.22569847	-0.051172733
"31673_s_at"	0.28781223	0.48313332	-0.27045345	0.13874722	-0.12721157	-0.10111761	-0.14368057
"31674_s_at"	0.21920872	0.19919825	0.5773778	0.3430786	-0.13472605	0.33205223	-0.33613205
"31675_s_at"	-0.1857934	0.16827393	-0.35473728	0.19456196	-0.08251667	-0.19901228	-0.11870146
"31676_at"	0.06815767	-0.121193886	-0.23325205	0.10940695	-0.009159565	0.009159565	-0.08775902
"31677_at"	0.039157867	-9.17E-04	-0.23713493	9.17E-04	0.021876812	0.011191368	-0.40121937
"31678_at"	0.28127623	0.30605125	0.19193697	0.1513629	0.07446003	-0.12829685	-0.14918232
"31679_at"	-0.049628258	0.11824274	-0.07345724	-0.018300056	-0.12720823	-0.05905962	0.071520805
"31680_at"	-0.36615324	-0.35553646	-0.22012281	-0.2502346	0.1466012	-0.10563326	0.115017414
"31681_at"	-0.08753061	0.008551121	-0.23268795	-0.06321573	-0.22154713	-0.27983427	0.0457592
"31682_s_at"	-0.008239746	0.35406685	-0.086933136	0.084943295	-0.00496006	0.17497158	-0.2020421
"31683_at"	0.26421356	0.079238415	0.07465935	0.026572704	-0.09577179	0.28384495	-0.20328999
"31684_at"	0.15128374	0.17710209	6.47E-04	-0.25042295	0.6644521	-0.10871267	-0.011506557
"31685_at"	-0.10372543	0.06387138	-0.031764984	0.020853043	-0.17751884	-0.32219124	0.005906105
"31686_at"	-0.030250072	0.08784723	0.29894018	0.100931644	0.0682435	0.05340147	-0.031713486
"31687_f_at"	-1.8363781	-0.1401186	-1.4638338	-1.0293446	0.89937305	1.8993864	0.46810818
"31688_at"	0.10302496	-0.11844921	0.22395658	0.039619446	0.12965202	-0.16053534	-0.19203281
"31689_at"	0.005325794	-0.06332159	0.008175373	0.10830355	0.082333565	-0.031449795	-0.030992031
"31690_at"	0.03797102	0.013792038	0.36303234	0.30945492	-0.20752287	-0.3166871	-0.013791561
"31691_g_at"	0.27661324	-0.015541554	0.039138317	0.3067279	-0.058766842	-0.16139936	0.01554203
"31692_at"	-0.111747265	0.14482737	0.362988	0.111747265	0.70255995	-0.11201048	-0.31497335
"31693_f_at"	0.19637394	0.02514553	0.053030014	0.23505306	-0.028878212	-0.14378738	-0.1369381
"31694_at"	-0.030656338	-0.09314728	-0.027981758	0.06819248	-0.019247532	-0.44346762	-0.08811998
"31695_g_at"	0.10994911	0.54154396	0.13525486	-0.057107925	-0.002345562	-0.10594654	-0.07064772
"31696_at"	0.3355565	0.15860367	0.17389631	-0.05187273	0.2730155	0.18889523	-0.12845564
"31697_s_at"	-0.5692129	0.03581047	-1.2899523	-0.72184944	0.4628067	0.12380123	0.08450127
"31698_at"	0.31849718	0.32320166	0.2031374	0.05159855	-0.13649273	0.086750984	-0.18359375
"31699_at"	0.25573778	0.035923004	0.5469141	0.008135796	-0.13620234	-0.015523911	-0.1160264
"316_g_at"	0.21980476	-0.22418642	-0.17552757	-4.49E-04	-0.049174786	-0.08970547	0.03929472
"31700_at"	0.010691643	0.02821827	-0.002220154	0.073664665	0.036824226	-0.12270546	-0.21453762
"31701_r_at"	0.33125782	0.32410145	0.123889446	-0.001918316	0.18194103	0.20860624	-0.21048117
"31702_at"	0.22009325	0.023106575	-0.20511436	0.11833668	0.22750854	0.04383087	-0.023106575
"31703_at"	0.11089468	-0.009696484	0.13395882	0.15105295	0.012736321	0.19313622	-0.07668924
"31704_at"	0.077638626	0.15854645	-0.06568384	0.062986374	-0.033217907	0.16720486	0.016269684
"31705_at"	0.116083145	0.057094574	0.06174755	0.120238304	0.043553352	-0.23329544	-0.17361546
"31706_at"	0.0081954	-0.08031559	-0.0081954	0.049459696	0.45150304	-0.06018567	-0.22366595
"31707_at"	0.16083145	-0.17344713	-0.18524456	0.012089253	-0.15625143	-0.011746407	0.30247307
"31708_at"	-0.68738556	-0.5416775	-0.10028267	-0.009703636	0.13948727	0.013282776	0.049567223
"31709_at"	0.001235485	0.1908741	0.13981724	-0.001235008	-0.002868652	-0.117176056	-0.040602207
"31710_at"	0.19046402	0.03723049	0.004995823	0.070510864	-0.1296072	-0.06662989	-0.11077309
"31711_at"	0.16524458	0.061000347	0.17244387	0.03556204	0.12556076	0.07045221	-0.09210873
"31712_at"	0.16812134	0.05888939	0.1584897	0.003797531	0.07474756	0.031792164	-0.028016567
"31713_s_at"	0.24198627	0.19757366	0.1529417	0.114729404	-0.07081175	-0.10452747	-0.10422945
"31714_at"	0.10071254	0.08390927	0.5805373	0.004035711	-0.30529022	0.06669879	-0.15031362
"31715_at"	0.17972183	0.020606041	0.13256264	0.01706314	0.019075394	0.012850761	-0.09175873
"31716_at"	0.1279316	0.08308983	-0.089401245	0.07025528	-0.057631493	-0.19549656	-0.10506344
"31717_at"	0.30259275	0.52007437	0.6172395	0.012336254	0.19989204	0.41896343	-0.012336254
"31718_at"	0.1567483	-0.017727852	0.07627463	0.16836476	0.017727852	-0.126441	-0.022292614
"31719_at"	0.65107155	2.322979	-0.20214033	1.6665688	-0.049070835	-0.47677422	-0.011061668
"31720_s_at"	0.37143755	2.0773125	-0.15530777	1.1571679	-0.708951	-0.8514271	-0.83956146
"31721_at"	0.33702612	0.101426125	0.14043283	0.14416456	0.35705137	-0.004912138	-0.0946691
"31722_at"	-0.34743404	-0.2900324	0.3164873	0.119503975	-0.080534935	0.017745018	-0.010426521
"31723_at"	-0.044614553	0.12183285	0.13770103	-0.021866083	-0.009709597	0.009709835	-0.11291623
"31724_at"	0.023263454	0.15896606	0.07438564	-0.023263454	0.051293373	0.2930236	-0.15413666
"31725_s_at"	0.29922438	0.08615446	-0.050705433	0.13650656	0.050705433	0.12129974	-0.27737522
"31726_at"	0.20298195	0.03277254	0.10968447	0.046462536	-0.10660505	0.17163706	-0.03108406
"31727_at"	-0.029006481	0.017167091	0.09274626	-0.026072025	-0.15597486	-0.152987	0.018892765
"31728_at"	0.26016045	0.09453583	0.04425621	0.074474335	-0.19822598	-0.034190178	-0.17841625
"31729_at"	0.19984579	0.08699131	0.3774972	0.12995172	0.34938526	0.12396836	-0.22441483
"31730_at"	0.16599274	0.14308071	0.45591164	0.001902103	0.21254444	0.19167137	-0.17985058
"31731_at"	0.2255969	0.17765856	-0.14598131	0.18174839	-8.65E-04	8.65E-04	-0.19346046
"31732_at"	-0.21681833	-0.25291252	-0.770771	0.7231331	-0.09395456	0.26161003	0.31998777
"31733_at"	0.43068457	0.21529293	0.44730377	0.05834055	0.3091483	0.41553688	-0.14543343
"31734_at"	-0.09573126	0.1284771	0.3000617	-0.001244545	0.021063805	-0.22940302	-0.06399059
"31735_at"	0.21490669	0.018916607	0.28335428	0.03340721	0.18270683	-0.018916607	-0.22678947
"31736_at"	-0.08584499	-0.06466293	-0.18185854	-0.061696053	-0.12439871	0.014404297	0.361197
"31737_at"	0.17256641	0.17646646	0.25603342	-0.23892498	0.12056017	0.06373215	0.23193836
"31738_at"	0.15327501	0.01721716	0.31856585	0.068231106	-0.01721716	-0.04691887	-0.16122341
"31739_at"	0.014291763	0.05799818	0.20978642	0.19852018	0.10863876	-0.07231951	-0.08223152
"31740_s_at"	0.02612114	0.114151955	0.100933075	0.09471798	0.007993698	-0.067233086	-0.045606613
"31741_at"	-0.12074852	-0.15591908	-0.09770441	-0.031132221	-0.009829044	-0.10703468	-0.076874256
"31742_at"	0.24513578	0.39512205	0.14844656	-0.09935188	0.14222908	0.34579706	-0.16108704
"31743_at"	-0.075212955	0.2538848	0.01010561	0.054056168	-0.06854248	-0.09818673	-0.021603107
"31744_at"	0.014480114	0.17906618	0.1018672	-0.06486893	0.034683228	-0.1027832	0.0795269
"31745_at"	0.112900734	0.20250702	-0.088508606	-0.077373505	-0.048051834	-0.16128826	-0.09196854
"31746_at"	0.14576721	-0.18801165	-0.05177498	-0.05841112	0.06322241	0.1262412	-0.004765511
"31747_g_at"	0.034455776	0.2960472	0.14917755	0.32151031	-0.034615517	-0.04967785	-0.1842165
"31748_at"	0.13118744	0.25128222	0.16304827	0.07601547	0.11745834	-0.047713757	0.006766319
"31749_f_at"	-0.019695282	-0.11811304	0.05347681	0.019695282	0.083814144	-0.089054585	-0.22955608
"31750_at"	0.26424456	0.22352457	0.3595171	0.06840706	0.023228645	0.27575064	-0.22155285
"31751_f_at"	0.086660385	0.09867668	-0.041729927	-0.15726471	0.103940964	0.63298416	-0.18385649
"31752_at"	0.356359	0.14526749	0.33800983	0.012515068	-0.077782154	-0.0254817	-0.08736515
"31753_at"	0.32793522	0.41463327	0.4796548	0.17403793	0.031648636	0.2455926	-0.16014099
"31754_at"	0.3688593	0.2534914	-0.1301434	0.05201602	0.094944954	-0.013489962	-0.11535883
"31755_at"	0.4432788	0.2691102	0.109908104	0.34966993	0.048144817	0.6611233	-0.29529762
"31756_at"	-0.08353877	0.40214133	0.15494728	0.03821826	-0.010659695	-0.07010722	-0.05201435
"31757_at"	0.23649216	0.106823444	0.23304987	-0.006932259	0.16167116	0.13004875	-0.006260395
"31758_at"	0.014722347	0.14604044	-0.040088177	-0.25489712	0.3685012	0.017556667	-0.04670143
"31759_at"	0.094841	0.001793861	-0.29711533	0.014501095	-0.001793861	-0.12560177	-0.21810436
"31760_at"	0.57399845	0.3498125	0.2909236	0.119253635	0.20319557	0.4705367	-0.0641613
"31761_at"	0.5721092	0.60902166	0.7824402	0.24313498	0.032059193	0.6494398	-0.06681156
"31762_at"	0.65057564	0.5154228	0.55281115	0.03437662	0.19014406	0.5538926	-0.03437662
"31763_at"	0.0400815	-0.06210804	-0.13641071	-0.0400815	0.092021465	-0.0863924	0.08008623
"31764_at"	0.23032522	0.09233713	0.27716875	0.03907156	0.19056368	-0.004127979	-0.15772557
"31765_at"	0.21082687	0.20600009	0.32777905	0.00377965	-0.00377965	0.03490615	-0.118324995
"31766_s_at"	0.05232334	0.20076513	0.23314142	-0.004562378	-0.19412851	0.004562378	-0.13151693
"31767_at"	0.29294395	0.3467288	0.39139938	0.18083096	0.019417763	-0.08608055	-0.21061563
"31768_at"	-0.13335371	0.05590248	-0.2659905	0.10979724	0.008460045	-0.06222701	-0.12247181
"31769_at"	0.2428217	0.090610504	0.21322823	0.12658358	-0.044573784	0.11625862	-0.0214715
"31770_at"	0.15668106	0.008433342	-0.008433342	0.15590286	-0.16100216	0.14835548	-0.04109955
"31771_at"	-0.16172719	-0.002444744	0.047531128	0.025324821	0.002444744	0.019009113	-0.013617039
"31772_at"	0.005409241	0.14645052	0.07848787	-0.032927513	-0.03228426	-0.005923271	-0.15932131
"31773_at"	-0.23610878	-0.09381342	0.012986183	0.08703232	0.08426714	0.30056715	-0.17974663
"31774_at"	0.14140272	0.16556883	-0.014698029	0.014698267	0.113387346	0.111766815	-0.18210387
"31775_at"	0.08632612	0.26534748	0.027628422	-0.027628899	0.20261288	0.19589424	-0.18467999
"31776_at"	0.11147022	0.3388729	0.3375597	-0.017001152	0.028737545	-0.036156654	-0.1954751
"31777_at"	-0.07741737	-0.06941748	0.09563351	0.21056843	-0.029936314	-0.058133125	-0.074911594
"31778_at"	0.173213	0.1659069	0.27278614	-0.006199837	-0.090522766	0.13738632	-0.21543121
"31779_s_at"	0.15208244	-4.22E-04	4.22E-04	0.06422663	0.048051357	-0.10404873	-0.082541466
"31780_f_at"	0.043944836	-0.004937649	-0.27476692	0.005767822	-0.041692257	-0.14984322	-0.002047062
"31781_at"	0.24014759	0.14715528	0.19949579	0.033945084	0.079349995	-0.17426538	-0.2067008
"31782_at"	0.04055977	0.09023857	0.2979293	-0.04055977	0.08754635	0.18256426	-0.049860954
"31783_at"	0.115404606	0.0996027	0.16715765	0.077190876	-0.028838634	-0.1793418	0.001298428
"31784_at"	0.002970696	0.27658844	-0.002970696	0.06102848	0.008708954	-0.054961205	-0.12095165
"31785_f_at"	0.14336967	0.2291317	-0.017607689	0.1493311	-0.00511694	0.08461571	-0.13531065
"31786_at"	0.13739157	-0.46521235	0.03530264	0.71418476	-0.35504627	-0.53691006	-0.03530264
"31787_at"	0.15277195	-0.24697495	0.025217056	-0.34454966	-0.34653854	-0.021834373	0.17400122
"31788_at"	0.35071564	0.28442144	-0.12488127	0.11132717	-0.0369339	-0.18772697	0.034662724
"31789_at"	0.2378602	0.06448412	0.3173313	0.1100831	1.15E-04	-0.11509371	-0.13086462
"31790_at"	0.006044865	-0.23637152	-0.1752677	-0.006044865	-0.15868378	-0.0645051	0.13380909
"31791_at"	-0.020835876	0.13078785	-0.15978956	-0.019276619	0.019277096	-0.14383984	0.026494503
"31792_at"	-0.08332825	0.13987374	-0.17550898	0.012914181	0.63034964	0.63829756	0.40039897
"31793_at"	0.20395327	0.12989855	0.2178669	-0.123763084	-0.07123661	0.9404173	0.10463619
"31794_at"	-0.13928413	-0.2697339	-0.16933346	-0.028676033	0.6030674	-0.025966644	0.21726847
"31795_at"	0.15241337	0.06645918	-0.081225395	-0.1389265	-0.020315647	0.021409035	0.055427074
"31796_at"	0.10017443	0.30479622	0.18217993	0.01058197	-0.006558895	-0.043184757	-0.078342915
"31797_at"	-0.12436199	-0.2421565	0.15382242	-0.029353142	-0.09089327	-0.32060194	0.005005837
"31798_at"	0.006856918	0.16136551	0.1721716	0.14711523	-0.0889616	-0.18213797	-0.089556694
"31799_at"	0.013634205	-0.26029873	0.50705147	0.24079847	-0.51317453	-0.20387459	-0.013634205
"317_at"	0.10032368	0.76049423	-0.4021182	-0.5068059	-0.01870346	0.01870346	-0.039707184
"31800_at"	-0.16849184	-0.57125425	-0.32343864	0.4675598	0.16113615	-0.09768963	-0.1863389
"31801_at"	-0.02452755	-0.19472885	-0.07367468	0.4243803	0.54073	0.44305658	0.014431477
"31802_at"	0.70716095	0.001495361	0.15087128	-0.020264626	-0.21514606	-0.27884293	-0.001495361
"31803_at"	0.04570675	0.1232605	0.10935593	0.02299118	0.011087418	-0.011087418	-0.13851261
"31804_f_at"	-0.006259918	1.8487005	0.05911827	-0.26452255	0.33841324	0.38214874	-0.36096764
"31805_at"	-0.1700759	0.02624607	-0.22613716	-0.026245594	0.24582958	1.0453753	0.39348555
"31806_at"	-0.13149452	0.051054	-0.16084719	0.048974037	0.09713745	-0.059278965	-0.05085802
"31807_at"	0.27497768	0.26677513	0.3579893	0.119288445	-0.026083946	0.19550228	-0.19385195
"31808_at"	-0.3044772	-0.23153782	0.13654232	0.07077265	-0.19952345	0.05823517	-0.001055241
"31809_at"	0.7975793	-0.007761002	0.9007182	1.3411765	-0.32417583	-0.019498825	0.007761002
"31810_g_at"	0.037467957	-0.31375122	0.19232702	0.57973576	-0.11599922	-0.33351994	-0.12981272
"31811_r_at"	9.41E-04	-0.03989458	0.103603125	-9.41E-04	0.026396036	0.09012103	-0.07341099
"31812_at"	-0.04079151	-0.09528971	0.07452774	-0.17206764	0.22715378	0.16018152	0.04079199
"31813_at"	0.11106634	-0.015221596	0.19734764	0.22064352	-0.060965538	-0.13180685	-0.1410408
"31814_i_at"	0.28235626	0.40885735	0.29723835	0.17033386	-0.079696655	0.12193966	-0.24498606
"31815_r_at"	0.19860649	0.2963171	0.35974693	0.17397213	-0.11262417	-0.047829628	-0.16377163
"31816_at"	0.2355156	0.5169344	0.29915237	0.07731056	0.003726959	-0.06399727	-0.011295319
"31817_at"	-0.56917	-0.002491951	0.10417271	-0.2309885	-0.598382	-0.47077656	0.21634483
"31818_at"	0.8025284	0.15193892	-0.002665997	0.02101183	0.002665997	0.15050077	-0.25305748
"31819_at"	0.15208197	-0.005708695	0.035233498	-0.061035633	-0.017846584	0.14179182	-0.020517826
"31820_at"	-0.24911737	-0.14325666	-0.11685705	-0.03558588	-0.043645382	0.039751053	0.38216877
"31821_at"	0.30318737	0.1675539	0.1247282	0.09737444	-0.069423676	0.007081032	-0.15249062
"31822_at"	-0.07392359	0.08722973	0.21606493	0.32182074	-0.067305565	-0.05503702	-0.032405853
"31823_at"	-0.26049566	-0.039758682	-0.18891096	0.22991943	-0.110376835	-0.57496405	0.05404806
"31824_at"	-0.6277952	-0.6835065	-0.10062218	-0.01613617	-0.21330738	-0.007333279	0.7128811
"31825_at"	0.24725533	0.055695534	0.12137365	0.004695892	0.13665533	-0.004695416	-0.18855476
"31826_at"	0.016382217	0.21553421	0.18948555	0.055165768	-0.03514576	-0.08464861	-0.12994862
"31827_s_at"	0.33931923	0.23845625	0.32575464	0.100491524	-0.105998516	0.060355186	-0.18829966
"31828_r_at"	0.3075571	0.12272167	0.22945118	-0.05939865	0.10969257	0.20388412	-0.18874264
"31829_r_at"	-0.16224194	-0.005818367	-0.39305878	-0.12406349	-0.009342194	-0.33873177	0.25572777
"31830_s_at"	0.65164185	0.31019735	0.012378693	0.28542662	-0.10564947	-0.19990873	-0.037796974
"31831_at"	0.31644964	0.21462727	0.23262215	0.21894264	-0.04663849	-0.15062332	-0.19879675
"31832_at"	0.10471392	0.13283539	-0.022256374	0.002960682	-0.15242147	-0.08848286	-0.011050701
"31833_at"	0.0392828	-0.3107443	-0.26577568	0.024046898	-0.005204201	-0.21450806	-0.028634071
"31834_r_at"	0.100337505	-0.21853375	-0.0703516	-0.09131384	-0.06384802	-0.022929192	0.021768093
"31835_at"	-0.008280277	0.19898081	-0.031011105	0.12938452	0.0937171	-0.03381729	-0.15023851
"31836_at"	-0.24979973	0.24474812	0.004267693	-0.012687206	0.13521338	0.1457386	-0.113036156
"31837_at"	0.10916901	0.20263672	0.10699272	0.10207939	-0.10722828	-0.14245605	-0.22703266
"31838_at"	-0.23219895	-0.021653175	-0.17662811	0.4780767	0.14471388	-0.043148756	0.035624266
"31839_at"	-0.09105301	0.2478075	0.19997692	0.07343912	-0.013306141	0.15365696	-0.2482276
"31840_at"	0.013625622	0.0381999	-0.06293774	0.03914833	-0.034861088	0.12651396	-0.04334116
"31841_at"	0.27991867	0.6170955	-0.39728212	-0.41889143	-0.22775269	-0.35287857	0.06698418
"31842_at"	0.15884924	0.31434584	-0.005764008	0.13413143	0.047680378	0.33324575	-0.11678743
"31843_at"	-0.38200545	-0.29389668	-0.297076	-0.02876234	0.18581533	0.6021838	0.4314394
"31844_at"	0.010460854	0.026548862	0.27369928	0.08334923	0.035240173	-0.010460854	-0.22191858
"31845_at"	0.021446705	0.36964512	-0.35565186	-0.28436947	0.19312668	-0.024477005	0.2433796
"31846_at"	-0.007531166	0.07638931	-0.04628849	0.08246803	0.033370018	-0.11858082	-0.021514893
"31847_at"	-0.096683025	-0.16376352	-0.012909889	0.012909889	0.097539425	-0.12223005	0.18631458
"31848_at"	-0.33984375	-1.2609816	-0.37160492	-0.9354925	0.072190285	-0.072190285	0.74815464
"31849_at"	0.23193026	0.0821867	0.22051096	0.165555	0.19490242	0.4306593	-0.061986446
"31850_at"	-0.12343311	-0.08077049	-0.22939157	0.07160568	0.047156334	-0.16426945	-0.001214027
"31851_at"	-0.15565062	-0.5165186	-0.34223318	-0.0599823	8.17E-04	0.09808302	0.29686117
"31852_at"	-0.036067486	0.1164341	-0.18113613	-0.16351366	-0.059314728	-0.04724598	0.39696884
"31853_at"	0.06317854	-0.31657696	-0.46538782	0.15776587	-0.010324955	0.010324955	-0.26176167
"31854_at"	0.035874367	-0.037115574	-0.30516768	0.17846012	-0.41112947	-0.6326513	-0.035874367
"31855_at"	0.043437004	0.33003998	-0.22508955	-0.018015862	0.25277567	-0.001998901	-0.050344944
"31856_at"	0.23126984	0.32502747	-0.05452442	0.1418953	0.003434658	-0.030867577	-0.059402466
"31857_r_at"	0.5327277	0.3262353	0.76633215	0.012897015	0.25042677	0.6861925	-0.037294388
"31858_at"	0.18652916	0.35242844	-0.19964743	0.061819077	-0.09972286	0.3535223	-0.15342522
"31859_at"	0.42050695	1.1185613	0.31135035	-0.14343452	-0.08712959	0.46639347	-0.21692514
"31860_at"	-0.002371788	-0.23336649	-0.16645288	-0.001163483	-0.03834486	0.052810192	0.037252426
"31861_at"	0.026410103	0.034007072	0.020737648	9.54E-07	-9.54E-07	-0.124409676	-0.05870819
"31862_at"	-0.10051322	0.086829424	-0.24756503	-0.07658434	-0.023044825	0.12856007	0.40055704
"31863_at"	-0.37596273	0.005427837	-0.16538239	-0.29170036	-0.122356415	0.24011183	0.24283457
"31864_at"	0.017791271	-0.1560545	-0.17585659	-0.11139679	-0.12653542	-0.2084403	0.22685242
"31865_at"	0.030941963	-0.041485786	-0.10048866	0.037507772	-0.10925794	-0.001657009	-0.12322831
"31866_at"	-0.005286694	0.17413664	0.0629735	-0.038897514	-0.23935413	-0.19618654	0.005286694
"31867_at"	-0.9671774	-0.6348982	-0.29630327	-0.25711918	-0.40860987	-0.8652859	0.8158264
"31868_at"	-0.0912199	0.11072731	-0.084472656	0.1261363	0.021261215	0.23280811	-0.03280735
"31869_at"	0.35882187	0.45143938	-0.003450871	-0.24074936	0.11876583	0.108876705	-0.033076286
"31870_at"	0.22415495	0.11106777	-0.016456604	-0.1759572	-0.26288414	-0.014197826	-0.00783968
"31871_r_at"	-0.08395481	0.108881235	0.33151054	0.044811726	0.10028267	0.010790348	0.10471654
"31872_at"	0.017420292	-0.31412506	-0.2650094	0.54375887	-0.18715143	-0.5220475	0.21342468
"31873_at"	0.325243	-0.14529753	0.273139	0.123687744	-0.05831194	0.41982841	-0.046251774
"31874_at"	-0.060181618	-0.7125888	-1.2231035	0.09593058	0.23204184	0.20454073	0.003662586
"31875_at"	0.013015747	-0.09930754	0.11153078	0.1941204	-0.04005003	-0.12695074	-0.13773394
"31876_r_at"	-0.06968069	-0.17173529	-0.43514562	-0.2231443	0.03777647	-0.31872153	0.41269398
"31877_at"	0.049007416	0.6340208	-0.13439035	-0.005688191	0.037368774	0.02871275	-0.050686836
"31878_at"	0.2318945	0.23788452	0.18088055	0.10491419	-0.16948223	0.1477294	-0.27402878
"31879_at"	-0.17437029	-0.06883669	0.36487484	0.6277795	-0.23308659	-0.41819382	0.050145626
"31880_at"	-0.06317425	0.025557995	0.086530685	-0.07985735	-0.13885283	-0.3182404	0.03669262
"31881_at"	0.01232481	-0.12631989	-0.006866217	-0.17502475	-0.027837276	0.076137304	0.26651335
"31882_at"	0.14346504	0.005904198	0.081811905	-0.10614872	0.087200165	0.058369637	-0.16311455
"31883_at"	-0.302495	-0.30673838	0.2389059	-0.02998352	-0.07593298	-0.27756882	0.07147837
"31884_at"	-0.25331402	0.09564352	-0.19279242	0.3044243	0.16929626	-0.20238924	-0.2463336
"31885_at"	0.022032738	0.10641575	-0.26360703	-0.02203226	0.2763977	-0.18873835	-0.0593853
"31886_at"	-0.06512928	0.06406975	-0.33960485	-0.34775066	-0.083697796	0.034475803	0.15733671
"31887_at"	0.92364216	-0.053126812	0.02113533	-0.02113533	0.10543537	0.44331598	-0.041291237
"31888_s_at"	0.15172815	0.60897636	-0.1670847	-0.55145216	0.16072083	-0.38869286	0.05551386
"31889_at"	-0.08397293	0.1676073	0.046738625	0.21642828	-0.03183174	-0.043542385	-0.15000677
"31890_s_at"	-0.14702511	-0.010921717	-0.06735134	0.10405111	-0.2182424	-0.19021082	0.1809938
"31891_at"	0.07295179	0.1711545	0.13651752	-8.85E-04	0.21347523	0.2592554	-0.23019457
"31892_at"	0.14739943	-0.67900133	0.19093132	-0.009720802	0.009720802	-0.3848033	-0.12755823
"31893_at"	0.34087944	-0.07657337	-0.36143398	-0.030392647	0.003887177	0.10639858	0.014285088
"31894_at"	0.11568308	-0.4362402	-0.16206837	-0.10612631	-0.18266487	-0.004487038	-0.07586622
"31895_at"	-0.048574924	-0.029861927	-0.13955164	-0.5404415	0.68118715	0.42510366	0.2409687
"31896_at"	-0.018493176	-0.22772312	0.25090218	0.018493176	-0.16289759	-0.0387249	0.15723848
"31897_at"	-0.32143688	0.40891504	0.29092884	0.2592597	-0.6618252	-0.56459427	-0.2895093
"31898_at"	-0.04653406	0.017092705	-0.020874023	-0.062169075	0.20682669	-0.20085812	0.16985273
"31899_at"	-0.31887817	0.04709816	-0.2444315	0.466784	-0.102097034	-0.19802856	0.16795444
"318_at"	0.14433956	0.18006611	0.004863739	0.41969013	0.26303005	0.33151245	-0.08621216
"31900_at"	4.35E-04	0.1257286	0.022772789	-4.35E-04	-0.08856487	-0.11815739	-0.11500931
"31901_at"	-0.24737358	0.20681667	-0.007875443	-0.057534218	0.066636086	-0.22758484	-0.039361
"31902_at"	-1.0596032	1.4600325	-0.12190819	1.3698025	-0.53297615	0.095077515	-0.056027412
"31903_at"	-0.083034515	-0.43274593	-0.17697	-0.42499018	-0.060101986	-0.12466478	0.10317135
"31904_at"	0.30139637	0.053969383	-0.16504192	0.24960423	0.002216339	-0.068675995	-0.16277218
"31905_at"	0.05535555	0.20848131	-0.095733166	0.05852461	-0.0336442	-0.17344522	-0.16432428
"31906_at"	-0.7246127	-0.21985197	-0.71017313	-0.27678442	0.20115376	0.38356304	0.52782726
"31907_at"	-0.3093443	-0.38744736	0.15124798	-0.27223587	0.045942307	0.14864254	0.22258377
"31908_at"	0.16830683	0.37972355	0.047878742	0.015231133	0.18992424	0.3005743	-0.12503576
"31909_at"	-0.029731274	0.02810669	-0.14657354	0.288136	0.05479479	-0.003856659	0.022040367
"31910_at"	0.034243107	0.15436316	0.29394674	0.095431805	0.379817	0.07736206	-0.05576849
"31911_at"	2.38E-04	0.074564934	0.08794165	0.018240929	-0.13094854	0.15655375	-0.20711374
"31912_at"	0.11505747	0.07074833	0.1352477	0.06942034	-0.092381954	-0.1687746	-0.19435596
"31913_at"	0.015640259	0.01209259	0.19669962	-0.019310474	-0.13777256	0.044610977	-0.07081413
"31914_at"	0.05354023	-0.11541796	0.12646675	0.086382866	-0.116095066	-0.022368908	-0.08035183
"31915_at"	0.012690544	-0.001856804	-0.099084854	0.049851418	0.001856327	-0.074867725	-0.109539986
"31916_at"	0.30298328	0.2010417	-0.018990517	-0.18086624	0.018990517	0.24440527	0.06601715
"31917_at"	0.1390953	-0.115592	0.11129761	-0.107748985	-0.023058891	0.24511099	-0.06641674
"31918_at"	0.034652233	-0.034652233	-0.37927485	-0.1824894	-0.3715191	-0.24487925	0.5751982
"31919_at"	-0.002811194	0.002810955	-0.115124464	0.20195723	0.011612654	0.0771904	-0.21926808
"31920_at"	0.22503853	-0.036610126	0.07373762	-0.059739113	-0.13330984	0.032023907	0.081758976
"31921_at"	-0.14267635	-0.19296694	-0.093603134	0.093016624	0.08203983	-0.17591143	-0.07370758
"31922_i_at"	-0.2598834	0.07061815	-0.11335802	0.001439095	-0.467865	-0.19694424	-0.020379543
"31923_f_at"	-0.10532284	0.017016888	0.01201582	-0.002614498	-0.12880373	-0.062191963	-0.1695919
"31924_at"	0.075786114	0.17689085	0.1305461	-0.08932638	-0.011162281	-0.026815414	7.49E-04
"31925_s_at"	-0.034854412	0.046993256	0.26352024	-0.010846138	-0.14803886	-0.09757757	-0.14356613
"31926_at"	0.060385704	0.04896736	0.20858693	0.10846758	-0.07100749	0.034104347	-0.086746454
"31927_s_at"	0.02173853	0.07722664	0.39119577	0.099336624	-0.16786003	-0.028499603	-0.066254616
"31928_at"	0.23790169	0.16188478	0.16663551	0.023204327	-0.19307232	-0.043589592	-0.023204327
"31929_at"	0.08471966	0.08336449	-0.028042316	0.0743494	0.04463625	-0.066681385	-0.14871597
"31930_f_at"	0.12067652	-0.13814926	-0.17287254	0.24458265	-0.036159515	-0.24860096	-0.14918756
"31931_f_at"	0.08492088	-0.22535038	-0.16676235	0.3381667	-0.11185074	-0.14789963	-0.07766819
"31932_f_at"	-0.21290255	-0.087486744	-0.17551422	0.020341873	0.3337903	-0.08464193	0.004122257
"31933_r_at"	0.26382446	0.32280064	0.4230013	0.056373596	0.10406685	0.24341679	-0.19600868
"31934_at"	0.18091679	-0.05091524	0.32286954	0.07551098	-0.045650482	0.08667874	-0.037010193
"31935_s_at"	0.05470848	-0.0102911	-0.02290678	0.20183182	-0.009505749	-0.27479935	-0.15638351
"31936_s_at"	-0.7252259	0.027060032	0.03051281	0.00974083	-0.009740353	-0.4304943	-0.045042515
"31937_at"	0.24732256	0.06629133	-0.14033175	0.021740437	-0.021740437	-0.036346912	-0.17190981
"31938_g_at"	0.16877604	0.43792915	0.22759056	-0.007656097	0.076597214	0.007656097	-0.17957592
"31939_at"	-0.19961977	-0.17114305	-0.21637917	-0.6068249	-0.4361844	0.004803658	0.10025978
"31940_s_at"	-0.21114159	0.013838291	-0.12382269	-0.022921085	0.112632275	-0.11450863	-0.15519571
"31941_s_at"	-0.027758121	0.1600585	0.22985125	0.116692066	-0.01999998	0.0785799	-0.0820961
"31942_at"	0.2888012	0.07890844	0.082989216	0.07113743	0.22361088	-0.18020725	-0.07113695
"31943_g_at"	-0.14043856	-0.003966332	0.42150545	0.24717045	-0.001497269	-0.4407258	0.05396366
"31944_at"	-0.3203268	-0.3622074	0.29715204	0.33448267	0.067848206	-0.24681234	0.08585405
"31945_s_at"	-0.040556192	0.23638296	0.20538378	-0.10815287	0.049165726	0.004347801	0.032021284
"31946_s_at"	0.4431491	0.07583141	0.52717686	-0.02109623	0.011145115	-0.019887924	-0.11122942
"31947_r_at"	0.065896034	0.019277573	-0.03818035	0.13821411	-0.19579983	-0.14275455	-0.05006504
"31948_at"	-0.114170074	0.2605691	0.6213498	-0.16234303	0.17664576	0.52460575	-0.056280613
"31949_at"	-0.011395454	-0.0942986	-0.083978415	-0.19418693	0.05805397	-0.46487403	0.12631893
"31950_at"	-0.3309126	-0.85668755	-0.13669968	0.8427324	0.06976414	-0.1298418	0.25038624
"31951_s_at"	0.11241531	-0.3863592	0.37277794	1.0373268	-0.16356087	-0.25007534	-0.033797264
"31952_at"	-0.52194023	-1.223196	-0.007416725	0.62198067	0.18574715	0.09878731	-0.04214382
"31953_f_at"	0.57350206	0.14143181	0.3435154	0.095541954	0.002587795	0.18412733	-0.002587795
"31954_f_at"	0.12259674	-0.054853916	0.24017715	-0.022613764	0.03899002	-0.06752801	-0.09185457
"31955_at"	-0.22978497	0.10591698	-0.34610176	0.021206856	0.30703163	0.33013153	0.059693336
"31956_f_at"	-0.25018692	-0.67225647	0.6243439	-0.0252285	0.25956535	0.12171078	-0.022242546
"31957_r_at"	0.09383297	-0.498518	0.46120834	-0.007605553	-0.060890198	-0.013467789	0.007606506
"31958_i_at"	0.29076338	0.059839487	0.38616276	0.15098238	0.1581912	0.2365551	-0.059839487
"31959_at"	0.2467308	0.007413387	0.061055183	-0.007413387	-0.113172054	-0.10200024	-0.08697605
"31960_f_at"	0.023303509	-0.06371689	-0.13927746	-6.68E-06	-0.04456854	-0.04178047	7.15E-06
"31961_r_at"	-0.04194498	0.010863781	-0.13820839	-0.06215906	0.012077332	-0.010863781	-0.15725183
"31962_at"	-0.063928604	-0.5353308	0.051602364	-0.005426407	0.1781025	-0.023208618	0.005426407
"31963_at"	-0.006509781	-0.06414175	0.065374374	-0.103321075	-0.12537193	0.13706732	-0.23073816
"31964_at"	0.09453869	-0.15962362	0.20833969	0.04888439	0.15408325	0.35719204	-0.07485151
"31965_at"	0.11483431	0.19088697	0.034132004	0.001672745	0.028262615	0.1705327	-0.17507458
"31966_at"	0.25046015	-0.13270354	0.083440065	0.19774008	-0.01776886	-0.23096442	-0.13930178
"31967_at"	0.30909777	0.37631607	0.18332624	0.012593269	0.11702061	0.29971218	-0.059726715
"31968_at"	0.23735619	0.17867851	0.331717	0.14877987	0.2771411	0.037626266	-0.037626266
"31969_i_at"	0.1242466	-0.022127151	0.011982918	-0.013453484	0.04271984	-0.011982918	-0.14956808
"31970_r_at"	0.18258142	0.15894198	0.01519084	0.005417347	-0.122508526	0.05934286	-0.13470697
"31971_at"	0.22939205	0.079092026	0.034945488	0.05731964	0.018399715	0.035746574	-0.22088766
"31972_at"	-0.01766777	0.09553981	0.04756546	0.011486292	0.15937352	-0.008179903	0.008180141
"31973_at"	0.09017372	0.022124767	0.21265984	-0.006776333	-0.092139244	0.00677681	-0.175179
"31974_at"	0.044561386	-0.044403076	0.22186661	0.16212177	0.10416126	0.095210075	-0.014240265
"31975_at"	-0.093910694	0.010017395	0.3625059	-0.035645008	0.09412289	0.08081627	-0.18447971
"31976_at"	0.20950747	0.10503101	0.047480106	0.03536868	-0.13237739	-0.11943984	-0.14354658
"31977_at"	0.012534142	0.08398914	0.10461044	0.12042999	0.033621788	-0.0078578	-0.2940035
"31978_at"	0.35571337	0.2548523	0.26677513	0.104254246	0.07706213	0.16883278	-0.080299854
"31979_at"	0.00152874	-0.00152874	0.037875175	-0.008466721	0.03530979	-0.124687195	-0.14345074
"31980_at"	0.011328697	0.26374388	-0.12770748	0.010656357	-0.010656357	-0.013706684	-0.24301147
"31981_at"	0.15368176	0.16522026	0.007780075	0.025021553	0.16723728	0.021073341	-0.16187
"31982_at"	-0.045093536	0.020097733	-0.1814003	-0.020097733	0.22739267	0.04120159	0.035999775
"31983_at"	0.24138165	0.09693861	0.18816471	0.31388474	-0.2867632	-0.13815784	-0.24061966
"31984_at"	0.13087177	0.35105228	0.3409376	-0.018206596	-0.05945587	0.004752159	-0.06006527
"31985_at"	0.26204538	0.35822058	0.3267727	-0.017315865	0.017315865	0.5826082	0.030179977
"31986_at"	-0.036827087	0.3075719	-0.030897379	0.041911364	0.016301155	-0.052026987	-0.112226725
"31987_at"	0.25637388	-0.05394745	-0.001545906	0.13502026	0.001545906	0.038250923	-0.06378794
"31988_at"	0.3529129	0.22006989	0.21530962	0.15973425	-0.014488697	0.12639046	-0.171906
"31989_s_at"	0.21843386	0.22347403	0.25990534	-0.10971117	-0.007724762	-0.14677191	0.095321655
"31990_at"	0.116500854	0.10035992	-0.003758907	-0.04343033	0.09572077	0.13247347	-0.10284042
"31991_at"	0.066587925	0.05685997	-0.059528828	-0.009407043	-0.07523823	-0.15747309	-0.014605045
"31992_f_at"	0.04059124	-0.33587217	0.035039425	0.22206783	0.25658226	-0.1602006	-0.27906704
"31993_f_at"	-0.22189856	0.019825935	-0.34272957	0.07343197	-0.019825935	-0.034622192	-0.10885191
"31994_at"	0.48482752	-0.05128622	0.77785826	0.054499626	0.38368654	0.50567436	0.006786823
"31995_g_at"	0.1110425	0.13179207	-0.027519226	0.10396385	0.05927658	0.027519226	-0.3233075
"31996_at"	0.1754322	0.34948587	0.018226147	-0.018321037	0.042121887	-0.016732693	-0.06355858
"31997_at"	0.004490376	0.23901606	0.05310154	0.18182564	0.16628075	0.19223166	-0.15110922
"31998_at"	0.015867233	0.37164783	0.18501139	-0.27363634	-0.015867233	0.10271931	0.06523943
"31999_at"	0.060576916	0.23238564	0.101837635	-0.05456257	-0.06417513	0.08895111	-0.08244133
"319_g_at"	-0.2722454	-0.26733017	-0.43759155	0.17721176	0.36021614	0.24010849	-0.05454254
"32000_g_at"	-0.035390854	-0.085575104	0.063305855	0.02801609	0.043141365	-0.1411705	-0.17734909
"32001_s_at"	-0.3810463	-0.6495733	0.06889725	0.29431105	0.15852928	-0.055214882	-0.10475063
"32002_at"	0.021647453	0.18370533	0.025204659	0.07968044	0.14479637	0.00702095	-0.046113014
"32003_at"	0.11561966	0.16743755	0.1544199	-0.12280655	0.21023607	0.13199663	-0.10357857
"32004_s_at"	0.37979126	0.23906422	0.017115593	0.012854576	-0.14710808	-0.288908	-0.022395134
"32005_at"	-0.118739605	0.003596783	-0.050117016	0.17212439	0.014965534	-0.041486025	-0.06613135
"32006_r_at"	-0.010121346	0.10015726	0.010120869	-0.09331608	-0.120100975	-0.31474257	-0.053198814
"32007_at"	-0.027558327	-0.06905651	-0.116482735	-0.026973724	0.080329895	-0.09343815	0.044701576
"32008_at"	0.16118765	0.07562971	0.40568686	0.016839981	0.13176823	0.05120039	-0.29160547
"32009_at"	0.066082	-0.13791275	-0.1646738	-0.12372637	-0.02095604	-0.3630309	-0.05110836
"32010_at"	0.053678513	-0.16750717	-0.030018806	-0.056572914	-0.13450241	-0.4199915	-0.09310722
"32011_g_at"	-0.104653835	-0.20851088	0.018811703	0.023008347	-0.06169653	-0.018811703	-0.16397333
"32012_at"	-0.22118092	0.18900871	0.1585908	-0.003887177	0.021030426	0.267035	-0.08767843
"32013_at"	0.009705544	-0.05137968	-0.07115841	0.17915201	0.1270423	0.01856327	-0.15035963
"32014_at"	0.2057476	-0.01979065	-0.07538819	0.06767845	0.063286304	-0.26300788	-0.11961985
"32015_at"	0.47398663	0.55476284	0.56824064	0.028102398	0.17410612	0.31595898	-0.028102398
"32016_at"	-0.003391266	0.278656	0.2400856	-0.03413105	0.12342596	0.13370848	0.013102531
"32017_at"	0.06215	-0.016465664	-0.00194788	0.018035889	0.06407976	-0.13103056	0.052783966
"32018_at"	0.28512	0.008425713	0.27121878	0.04384446	0.07362652	-0.10155153	-0.116747856
"32019_at"	-0.1358242	-0.083415985	0.278615	-0.10251188	0.13711214	-0.058772564	0.037449837
"32020_at"	0.054613113	-0.0987165	0.03871441	0.1670692	0.09052682	0.13186288	-0.121828556
"32021_at"	0.10312176	0.2189827	0.12115574	-0.06969547	0.12092304	-0.039772987	-0.07547617
"32022_at"	0.05743885	0.15474844	-0.046853065	-0.17634511	-0.07919979	-0.009883404	0.009883404
"32023_at"	0.10008335	-0.10908842	-0.054376125	0.1371212	-0.18181705	-0.09309459	-0.12353659
"32024_at"	0.22410822	0.15254736	0.1845169	0.11351633	0.05843401	0.17532015	-0.15445948
"32025_at"	-0.32756948	0.18924809	0.1481762	-0.16027927	0.047461033	-0.44107914	0.22903967
"32026_s_at"	0.08833599	-0.33591843	-0.4435444	-0.23761797	-0.14347506	0.041495323	0.123989105
"32027_at"	-0.02350974	0.06348705	0.12029314	0.012490988	0.16116476	0.29667068	-0.053298235
"32028_at"	-0.04511404	0.07730627	0.053913593	0.016861916	-0.1605773	-0.48361254	-0.076683044
"32029_at"	0.007642746	0.10175705	-0.18466187	0.045693398	-0.007642746	0.18750381	-0.32351685
"32030_at"	-0.3081293	0.009974957	0.39804077	-0.021548748	-0.033216476	0.035006046	0.039116383
"32031_at"	0.11396122	0.30562115	0.14331722	0.025909424	0.052001	-0.031329155	-0.26808167
"32032_at"	-0.17779446	-0.13604736	-0.1651802	-0.1870079	-0.21636486	-0.07367802	0.14048862
"32033_at"	0.007023335	0.11433983	-0.007023335	0.1348772	0.025931358	0.102199554	-0.086504936
"32034_at"	0.059892178	-0.5137718	-0.2530408	-0.23129368	0.05187559	-0.05187559	0.4678917
"32035_at"	-0.012629032	-0.024209023	0.34957266	-0.29464006	0.027170658	-0.17346859	0.5089226
"32036_i_at"	-0.053689957	-0.2714796	-0.41989994	-0.100684166	0.04408741	-0.034196854	0.034196854
"32037_r_at"	0.002960682	0.03239727	-0.07296991	-0.11844683	-0.07469082	-0.30352592	-0.040946007
"32038_s_at"	-0.15156174	-0.3165846	-0.28858423	0.10302019	0.062028885	-0.109549046	0.16589785
"32039_at"	-0.8576765	-0.18827009	-0.32753325	-0.08712959	0.13281488	-0.27893496	0.4199295
"32040_i_at"	0.018701315	0.020860434	0.41146207	-0.057065487	-0.24201322	-0.048657656	0.020027637
"32041_r_at"	-0.2568941	0.003282785	0.34678555	0.031910658	-0.2609961	-0.060195684	0.14921212
"32042_at"	0.20259619	-0.19295645	0.29237127	-7.69E-04	-0.092336655	0.076039314	-0.087521076
"32043_at"	0.0402503	0.041100025	-0.017113209	0.01449585	0.10709858	-0.19132471	-0.21971989
"32044_at"	0.07461786	0.042649746	0.13014603	0.087040424	-0.06653738	0.04084921	-0.25783682
"32045_at"	-0.11468601	-0.033996582	-0.08046913	-0.06968784	-0.06529713	-0.014549732	0.08574772
"32046_at"	0.18971252	0.04929638	-0.2562213	-0.28483582	0.07487583	0.117708206	-0.113934994
"32047_at"	0.28885746	0.056026936	-0.084181786	-0.021329403	-0.016841412	0.18728495	0.0450325
"32048_at"	-0.14644623	0.12392807	-0.1384201	0.04261589	-0.12411785	-0.15971518	-0.09988546
"32049_f_at"	-0.065428734	-0.016845703	-0.07351732	0.13015604	-0.23462915	0.11553192	0.06003809
"32050_r_at"	-0.12093878	0.19292498	-0.085464	-0.19327974	-0.03651476	-0.046013832	0.051712036
"32051_at"	-0.21037245	0.13052273	-0.4321928	-0.01227808	-0.38341475	0.014894962	0.10603094
"32052_at"	-2.2280245	-0.021026611	-1.55163	-0.9219446	0.7229309	1.0230179	0.3666153
"32053_at"	0.082345724	-0.003292322	-0.30151892	-0.07349944	0.17086244	-0.11130571	-0.031238794
"32054_at"	0.2338872	0.2385931	0.31890917	-0.016685009	0.14407682	0.23744917	-0.04768181
"32055_g_at"	0.12613153	-0.093195915	0.15547562	0.14570808	-0.035853863	0.2526288	-0.1909194
"32056_at"	0.018105984	0.094314575	-0.024941444	0.108546734	0.022854805	0.07982969	-0.19159746
"32057_at"	-0.002785206	0.008891106	-0.3168702	0.07577419	-0.35433722	0.002785206	-0.21282339
"32058_at"	0.2124176	0.3336153	0.2578764	-0.004183292	-0.014829636	0.084346294	-0.23923492
"32059_at"	-0.08946943	-0.3827839	-0.07916021	0.16324663	0.051582336	0.06761265	0.29459524
"32060_at"	-0.14573002	-0.2581892	0.02581644	-0.02307272	0.02307272	-0.10921812	0.2297411
"32061_at"	0.022367477	-0.11050844	-0.20917034	0.15169191	-0.23748207	0.002724171	-0.07078314
"32062_at"	-0.34789705	0.4207859	-0.1125226	0.044344902	0.11803675	0.33090305	-0.16565561
"32063_at"	-0.075240135	-0.13019562	0.003313065	-0.115543365	0.08674908	-0.17806387	0.047611237
"32064_at"	-0.040301323	-0.012468338	0.033919334	0.060067654	-0.27199888	-0.20440435	0.012468338
"32065_at"	1.6199846	-0.841949	-0.44759893	-0.26801538	-0.055843353	-0.81842804	1.0494442
"32066_g_at"	1.2391844	-0.79520607	-0.4751091	-0.41384792	0.077373505	-0.85465527	1.1708097
"32067_at"	0.9896169	-0.9432788	-0.47861195	-0.023364067	0.18530083	-1.3292718	0.81702757
"32068_at"	0.38296556	0.050649643	0.20860577	0.025988102	0.0632453	0.4938345	-0.15900612
"32069_at"	0.2828622	-0.017382622	-0.28107166	-0.26708364	-0.2536869	-0.48934555	0.3143959
"32070_at"	0.23272705	0.19294071	0.03134823	0.05927849	0.09533596	0.11401081	-0.15251541
"32071_at"	0.14838505	0.18527365	-0.004001141	0.06997681	0.039914608	-0.121254444	-0.19300938
"32072_at"	0.088431835	0.2743411	0.009257317	-0.06854153	0.07137632	-0.019795895	-0.1189909
"32073_at"	0.18862915	0.0507164	-0.073664665	-0.017572403	-0.039346695	0.06180477	0.058606148
"32074_at"	0.03450632	0.08278084	-0.018353939	-0.32260323	0.068385124	0.24563599	-0.11037731
"32075_at"	-0.22095203	-0.07816744	-0.12131691	-0.10673094	-0.3028593	-0.31396294	0.2340126
"32076_at"	0.01808405	-0.5148926	-0.29244614	-0.033236027	0.38905096	0.5202341	0.5596161
"32077_s_at"	0.23595381	0.02172184	0.20782804	0.48552608	-0.11425638	-0.20331573	-0.15650225
"32078_at"	0.09893131	-0.028987885	0.3910842	0.02281046	-0.09091282	-0.046163082	-4.86E-04
"32079_at"	-0.17738104	-0.09688282	-0.055434704	0.15612698	0.023098469	-0.24015808	0.122179985
"32080_at"	0.3073063	0.03483963	-0.27023697	-0.20343685	0.16735554	-0.12498665	-0.01863861
"32081_at"	0.034474373	-0.08147144	-0.024451256	-0.003886223	0.119409084	0.46236563	0.003886223
"32082_at"	0.0460639	-0.38468695	-0.07027674	0.041833878	-0.16676998	-0.1395855	-0.059683323
"32083_at"	0.3662758	-0.073541164	-0.116062164	0.008565426	0.14876652	0.09983897	0.013980866
"32084_at"	-0.1743803	0.082336426	-0.22074461	-0.15454769	-0.0823369	-0.3628211	0.5592022
"32085_at"	0.36844254	-0.35124588	-0.29050922	-0.04064274	-0.3913164	-0.7175255	0.11624575
"32086_at"	0.11155796	0.003882408	0.061715603	-0.114495754	0.0844965	-0.012522221	-0.024972439
"32087_at"	-0.11468649	-0.47731876	-0.11689806	-0.20275545	0.486691	0.04025507	0.5899906
"32088_at"	-0.15237975	0.41080022	0.23257565	-0.036105394	-0.089532614	-0.14057899	0.007809162
"32089_at"	0.084774494	-0.75022244	-0.8974385	-0.8750684	0.13144207	1.5064621	1.2044215
"32090_at"	0.6011276	-0.9013257	0.41500902	0.41026354	-0.32797337	-0.21381283	0.061269283
"32091_at"	0.23690939	0.4007187	0.26960468	-0.022015572	-0.060896397	-0.014778614	-0.02556324
"32092_at"	-0.13671112	-0.14698887	-0.1490736	0.29757595	-0.14065742	-0.37456417	0.011296272
"32093_at"	0.007190228	-0.17164564	-0.5296087	-0.38811445	0.28528547	0.13992643	0.36276865
"32094_at"	-0.12217331	0.23740721	-0.04431343	0.034283638	-0.020140171	-0.00450182	-0.03155899
"32095_at"	0.054955482	0.36691284	0.0479331	0.2099638	-7.05E-04	0.04329443	-0.19965029
"32096_at"	0.21478748	0.8129606	0.22209454	-0.09482765	0.022585392	-0.02768135	-0.1336832
"32097_at"	0.106490135	0.87484455	-0.031677246	-0.019959927	-0.07206726	0.053791046	0.01995945
"32098_at"	0.26320028	0.4871521	-0.114616394	-0.001704216	0.054860592	-0.009476662	-0.28507948
"32099_at"	-0.20019102	0.74981546	0.019265175	0.039252758	0.052378178	-0.05485201	-0.019265175
"320_at"	-0.12795734	0.30844688	0.7797227	0.032179832	-0.15646696	0.13312674	-0.13899946
"32100_r_at"	0.09586048	0.20279884	-0.07522392	0.07283878	-0.039596558	-0.002796173	-0.12115288
"32101_at"	0.21325111	0.21362305	0.20013809	0.11092758	0.2105627	0.27946758	-0.10889864
"32102_at"	0.3463149	-0.32960892	0.029602528	-0.121611595	-0.072757244	0.110044	0.30162382
"32103_at"	0.024087906	0.36496925	0.18283081	0.06629944	-0.07657623	-0.06061268	-0.26673794
"32104_i_at"	-0.085240364	0.007083893	-0.12387848	0.057567596	-0.007083893	0.08107281	-0.09681225
"32105_f_at"	-0.1316328	0.102350235	0.012696743	0.08195734	-0.08325338	-0.19640493	-0.22153902
"32106_at"	-0.07434702	0.078496456	-0.033192158	0.036789417	-0.13835001	0.1155467	0.018151283
"32107_at"	0.26198435	0.06687021	-9.91E-04	0.026714325	0.07406807	-0.042858124	-0.23046446
"32108_at"	0.27871704	5.52E-04	-5.52E-04	-0.009049416	0.08342457	0.2184844	-0.117589
"32109_at"	0.012590408	0.042607307	-0.14372301	-0.012590408	-0.016227722	0.59436274	0.22228956
"32110_at"	0.6399369	-0.27901173	0.16898108	0.5243788	-0.12318516	0.12318516	-0.3108554
"32111_at"	0.04602146	-0.23282051	-0.0667038	-0.30165958	0.104430676	-0.008775234	0.0906806
"32112_s_at"	0.08842993	0.22967434	-0.020347118	0.009940147	-0.001535893	0.001535893	-0.06568098
"32113_at"	0.34755707	0.38403368	0.21979237	7.53E-04	0.034160614	0.53175545	-0.13050985
"32114_s_at"	0.07391405	0.08089876	0.27801943	0.2847042	0.09997034	0.018087864	-0.18433428
"32115_r_at"	0.044327736	-0.15269089	0.006595612	0.31119823	-0.023955345	0.018780708	-0.13542938
"32116_at"	0.33826303	0.1666727	-0.11274767	-0.15073347	-0.035086155	-0.06671524	0.113687515
"32117_at"	0.051663876	-0.24790049	-0.009054184	0.10188913	-0.11841917	-0.12537432	0.05846691
"32118_at"	-0.2301259	9.51E-04	-0.04455042	-0.048567772	0.05360222	-0.022315979	0.24999905
"32119_at"	-0.6752806	-0.43271446	-0.3448887	-0.16895771	-0.3792944	0.07531643	0.64117336
"32120_at"	0.19534874	0.38049316	0.00456667	0.027616024	-0.00456667	0.30918264	-0.041033268
"32121_at"	0.19267654	0.13739347	0.121889114	0.084377766	0.10404825	0.24063063	-0.03449154
"32122_at"	0.04654026	0.01465416	-0.1677723	0.1449976	-0.040431976	0.104605675	-0.01465416
"32123_at"	0.22356272	0.027442932	0.04710436	0.046957493	-0.13569307	0.002274036	-0.06747007
"32124_at"	0.002884865	-0.031684875	-0.19156122	0.15637112	-0.73507404	-0.37929678	-0.002884865
"32125_at"	0.048573017	-0.3689561	-0.12818956	-0.09334326	-0.1978631	-0.28278828	0.35011435
"32126_at"	-0.042925835	0.076491594	0.15518785	-0.043555975	0.028343678	0.002502441	-0.06932902
"32127_at"	-0.12264156	-0.005479336	0.31835508	0.037091732	-0.2149539	-0.44807768	-0.047248363
"32128_at"	-0.03159237	0.0386405	0.0491333	0.07134724	-0.103185415	-0.018741846	-0.13736486
"32129_at"	-0.36344957	-0.24376726	-0.14193535	0.005399227	-0.15176392	-0.016002178	0.41576242
"32130_at"	-0.18762445	-0.4229741	-0.11319685	0.17596054	0.10935211	0.107581615	0.18499756
"32131_at"	-0.37166214	-0.5591855	-0.48868084	0.04731226	0.006137848	-0.26280546	0.42670012
"32132_at"	-0.08383131	0.12540102	-0.4611678	-0.012635708	-0.25563908	-0.07349014	0.34121704
"32133_at"	0.26935673	0.4480152	0.33476543	0.22000599	-0.1757102	-0.3792243	-0.16836739
"32134_at"	-0.19448757	-0.24814749	-0.5592456	-0.3047967	0.19695091	-0.08998108	0.42125225
"32135_at"	-0.22729492	0.0422287	-0.18066597	0.35692883	0.046034813	0.28211403	-0.0422287
"32136_r_at"	0.03291869	0.17864394	0.026213646	-0.12057543	0.008727789	0.09116626	-0.09213638
"32137_at"	0.1449461	-0.19030857	-0.302042	0.3586464	0.07778168	0.47400665	-0.024560928
"32138_at"	-0.034130096	0.17391586	0.11585426	-0.12686825	-0.53958225	-0.10251522	-0.096339226
"32139_at"	-0.21811867	-0.062692165	0.57589245	0.098101616	-0.3778653	-0.4110632	0.28605366
"32140_at"	-0.22755718	0.24725342	-0.5802002	0.15376759	0.36965466	-0.26573944	0.040545464
"32141_at"	-0.21775246	-0.011135578	-0.002385616	0.002386093	0.018298626	-0.2794137	-0.02402258
"32142_at"	0.08780861	0.057878494	-2.06E-04	-0.21897268	2.06E-04	0.48180294	0.31613111
"32143_at"	0.16237545	0.08970308	0.07658863	0.23164225	0.17049456	-0.04241419	-0.06109619
"32144_at"	0.27542925	-0.32288456	-0.05201435	0.091600895	-0.09576368	-0.12254858	0.20118332
"32145_at"	-0.011898994	-0.13217163	-0.018126488	-0.08675766	0.038497925	0.1920166	0.11900616
"32146_s_at"	0.17225456	-0.1745553	0.2101407	0.2086196	-0.25598907	-0.13714981	-0.1035347
"32147_at"	0.020299673	0.39543056	0.09739542	-0.20414495	0.26276445	-0.020618439	-0.100333214
"32148_at"	-0.26206493	-0.18610382	-0.19824457	0.103275776	-0.102953434	0.18218994	-0.04677725
"32149_at"	0.17261362	0.23574972	0.4134202	-0.120845795	0.2982912	0.51751137	-0.064312935
"32150_at"	-0.5829177	0.0744524	-0.16279507	-0.003866196	-0.060616493	-0.10608578	0.42577744
"32151_at"	0.5295429	-0.097976685	0.23841286	0.30859566	-0.17711353	-0.22137547	-0.15561295
"32152_at"	0.08869505	0.19840002	-0.18922663	-0.038917065	0.13601542	-0.07864475	-0.25997972
"32153_s_at"	-0.005290985	-0.066488266	-0.07173061	0.025527	-0.18673325	0.15985107	-0.07125282
"32154_at"	0.081195354	0.17677307	0.26214695	0.1614604	-0.109294415	0.001049995	-0.082376
"32155_at"	0.28569221	0.17543364	0.08643532	-9.87E-04	9.87E-04	0.19626188	-0.025413513
"32156_at"	0.78979015	0.017430305	0.01916027	-0.091293335	0.042643547	-0.012570381	0.012570381
"32157_at"	0.023352623	0.14448547	-0.24936295	0.26512527	-0.023352623	0.052145958	-0.04023552
"32158_at"	0.5413027	0.3343277	-0.26052046	0.48955202	-0.07740402	0.29627514	0.021309853
"32159_at"	-0.14954281	-0.01393795	0.047919273	0.056936264	0.07317972	-0.16609287	-0.06745434
"32160_at"	-0.31618786	-0.41635036	-0.46327686	0.06760931	-0.32451153	-0.19959402	0.3345337
"32161_at"	-0.6456795	-0.32173777	-0.6129675	0.07683563	-0.07683563	-0.63683414	0.41392565
"32162_r_at"	0.027782917	0.16624594	0.056341648	7.81E-04	-0.09108782	0.009784222	-0.038201332
"32163_f_at"	0.048558712	0.14212513	0.16632414	-0.52668524	0.597528	-0.048558235	-0.10457659
"32164_at"	0.013050079	0.09591913	0.2961893	-0.005849361	0.23193502	-0.1410327	-0.08290529
"32165_at"	-0.04129219	-0.4650607	-0.5077925	-0.015388966	-0.039580822	0.14181232	0.0244627
"32166_at"	0.043474197	0.8573942	0.21691322	0.7545519	-0.14185047	-0.054344177	-0.043474197
"32167_at"	-0.23474073	-0.3058896	-0.2648158	-0.009395123	-0.07207775	-0.5099859	0.009395123
"32168_s_at"	0.9235616	-0.069820404	-0.23915529	0.044588566	-0.11571026	-0.26175833	-0.030655384
"32169_at"	-0.28319836	-0.50874233	-0.22286797	0.0569973	0.27612877	-0.015738487	0.35440063
"32170_g_at"	0.07462692	-0.031569004	-0.12012339	0.031569004	-0.14349318	-0.07453489	0.18225813
"32171_at"	-0.93968296	-0.036747932	-0.1876545	0.14090729	0.036747932	-0.32889605	0.2909398
"32172_at"	-0.14455223	-0.23387003	-0.22502661	0.20207787	-0.28077698	-0.29858923	0.16004181
"32173_at"	-0.28860474	0.004320622	-0.23749447	-0.32660532	-0.14089584	-0.004320145	0.21622515
"32174_at"	0.05051279	-0.10926628	-0.25437117	-0.017382145	0.28787327	0.1896224	0.19909096
"32175_at"	-0.26821375	-0.22505283	-0.43384552	0.13155556	0.008586884	-0.1793375	0.12354565
"32176_at"	-0.11859608	0.33955002	0.10736942	0.06909084	0.0358696	0.60873985	-0.1865282
"32177_s_at"	-0.117100716	0.12695408	0.06745148	0.091629505	-0.08983326	0.15001345	-0.22082424
"32178_r_at"	-0.18869567	-0.105779886	0.02923131	-0.19627237	0.15762281	-0.02923131	0.22582555
"32179_s_at"	-0.056758642	0.049557924	0.21827078	0.006296158	-0.11329198	0.048853874	0.11425924
"32180_s_at"	-0.010742188	-0.25819635	-0.1343875	0.07902336	0.010742188	-0.22711372	0.058773518
"32181_at"	0.08534813	-0.09073162	-0.02895832	0.063025475	-0.048714638	0.009068489	-0.009068489
"32182_at"	-0.05518198	-0.030245781	0.037854195	-0.02315092	-0.008362293	0.035119057	0.19188786
"32183_at"	-0.6930442	-0.53555155	-0.8141885	-0.35473204	0.041423798	-0.48327398	0.6216593
"32184_at"	0.36905718	-0.54160166	-0.82078314	0.22913837	0.21182632	-0.025231361	0.025231361
"32185_at"	-0.16132307	-0.47395897	-0.03921795	0.519691	0.12473154	-0.12715197	-0.07602644
"32186_at"	0.009081841	0.08927536	-0.073236465	-0.19029188	0.42781782	0.09222555	0.44605684
"32187_at"	-0.092442036	-0.05364752	0.12866402	-0.09694147	0.07260084	0.19221354	-0.09786606
"32188_at"	-0.010083675	0.12586069	0.43446255	1.171927	-0.33910608	-0.111383915	-0.3674369
"32189_g_at"	0.15521288	0.14300728	0.067327976	0.2374754	-0.06258488	-0.013942719	-0.3109169
"32190_at"	-0.03766775	0.5629139	-0.42080927	0.15453243	-0.10361624	0.19869423	0.07846546
"32191_at"	0.34660816	0.05503893	-0.120922565	0.38856983	-0.16779947	0.06657314	-0.024036407
"32192_g_at"	-0.059214592	-0.06364918	-0.19482422	0.2001152	-0.05750084	-0.09175873	0.046726227
"32193_at"	-0.34415007	0.039376736	-0.9460139	-0.4194262	0.58647346	0.50624514	0.9078274
"32194_at"	-0.089075565	-0.25286913	-0.050262928	-0.052144527	-0.006781578	0.07981348	0.19838381
"32195_at"	-0.20356321	-1.1151619	0.2745595	0.94147015	-0.026806355	0.026806355	-0.17969131
"32196_at"	-0.2675972	-0.32284832	-0.31085777	0.13710022	-0.4623685	0.1596117	0.15997028
"32197_at"	-0.08962107	-0.02899456	0.10071325	0.13189697	-0.033370495	0.32857084	0.01204586
"32198_at"	-0.0352726	0.21309566	-0.010773659	0.06962013	0.015520096	0.01478672	-0.10037804
"32199_at"	0.14626384	-0.02329731	0.050610304	-0.052993536	0.13114023	0.023297548	-0.086997986
"321_at"	7.20E-04	0.004031658	0.10815811	-7.20E-04	0.21279907	0.060991287	-0.02580309
"32200_at"	-0.14487863	-0.13897061	-0.06412101	-0.005509853	0.12602258	0.013095379	0.0187428
"32201_at"	-0.008615494	0.008615494	0.15487766	0.13760185	-0.10362911	0.11730385	-0.19260502
"32202_at"	0.13282871	0.27027512	0.1210804	-0.013743401	-0.24720287	-0.25010777	-0.09085655
"32203_at"	0.405694	0.18172264	0.089021206	0.04673481	0.24775982	-0.2292676	-0.1798687
"32204_at"	0.081484795	0.22857285	0.07954502	0.045243263	-0.09137249	-0.04188347	-0.16252327
"32205_at"	-0.014746666	-0.58512497	-0.4199524	-0.07592487	0.014747143	-0.17691755	0.4883685
"32206_at"	-0.27388763	-0.7715473	-0.1861639	0.18403435	-0.32388544	-0.42731905	0.15583324
"32207_at"	0.24503088	-0.045251846	-0.03648472	0.13761663	0.00133276	0.2326746	-0.0816288
"32208_at"	-0.34399176	-0.07455778	-0.026094437	0.09185314	0.018507004	-0.5497155	-0.018507004
"32209_at"	-0.012093544	0.1747036	-0.19472027	0.13817215	-0.17380142	-0.014184952	-0.015185356
"32210_at"	-0.19915581	-0.2875557	0.16839647	-0.027265072	0.3230195	-0.006337643	0.48389006
"32211_at"	0.21917343	0.07837057	-0.530674	-0.062128544	-0.22264767	-0.24584389	0.30249023
"32212_at"	0.36317444	0.053425312	0.001066208	0.24562216	-0.15612316	0.4800806	-0.00333643
"32213_at"	-0.002662182	0.26929522	0.18716669	0.015765667	-0.07132673	-0.054008484	-0.2810359
"32214_at"	-0.69786596	-0.50435925	-0.62815666	0.165874	0.20287943	-0.14765978	0.10364628
"32215_i_at"	-0.69802666	-1.5172143	0.054523945	-0.32108974	0.5573902	-0.054523945	0.4587636
"32216_r_at"	-0.33385158	-0.022162199	0.08848834	-0.13202024	0.10288072	0.06288314	0.022162199
"32217_at"	0.22215986	-0.30626535	-0.39270496	-0.003407955	-0.14285898	0.059185505	0.0762887
"32218_at"	-0.3433895	-0.49462557	-0.22638988	-0.043902397	-0.3314314	-0.03626728	0.31114197
"32219_at"	-0.645411	-0.78218603	-0.23087978	-0.39206314	-0.26693296	0.03134823	0.5363841
"32220_at"	-0.29714966	-0.5772109	-0.54159546	-0.27465677	-0.056257725	0.10959482	0.03169632
"32221_at"	-0.4072156	-0.17692995	-0.14530325	-0.10716772	0.17219019	0.013008595	0.17897701
"32222_at"	0.07465601	0.09207392	-0.12733984	0.075033665	-0.025862217	-0.33744717	-0.088103294
"32223_at"	-0.12603283	0.2200985	0.28697586	0.047344208	-0.047344208	-0.15870285	-0.056952477
"32224_at"	-0.31281424	-0.08886862	-0.51164293	0.011788845	-0.011788845	0.07298899	0.1271553
"32225_at"	0.20621729	0.090476036	0.13284063	-0.06469107	-0.018464565	-0.008506775	0.008506775
"32226_at"	0.19700241	0.020976067	0.5035877	0.57798386	-0.21944618	-0.13852024	-0.07465744
"32227_at"	-0.7145276	-0.6717477	-1.6510763	-0.7719445	0.16015244	0.19948912	0.7739363
"32228_at"	0.055010796	-0.04410553	-0.23540688	0.12198925	0.01541996	0.12364483	-0.15140533
"32229_at"	0.05871916	0.002540588	-0.02596426	0.024087429	0.020054817	-0.026114464	-0.1620307
"32230_at"	0.14390564	-0.1881795	0.03253889	-0.28999805	0.22665119	0.030633926	0.14483356
"32231_at"	0.061428547	0.29271984	0.003018856	-0.003019333	0.0409379	0.3075261	-0.029482841
"32232_at"	-0.27128935	-0.029032707	-0.036500454	0.10408163	-0.042058468	0.020695686	-0.020695686
"32233_at"	0.1305685	0.025316715	0.38707066	0.05657959	-0.19197083	0.009590149	-0.27774477
"32234_at"	-0.026408672	-0.22556162	0.02640915	0.32587147	-0.4146242	-0.20442057	-0.19975615
"32235_at"	0.22037792	0.40626526	0.013772011	-0.08948231	-0.23112679	-0.013772011	-0.17465591
"32236_at"	0.010447502	0.016676903	0.03670883	-0.12764263	0.13445759	0.26639652	-0.06284237
"32237_at"	0.09826946	-0.13858032	0.5852957	0.40530872	-0.42047405	-0.17875099	-0.14833355
"32238_at"	0.07161713	0.022670746	0.12463236	0.061456203	-0.069954395	-0.022670746	0.24238396
"32239_at"	0.20875573	0.16850829	-0.09453297	-0.08565426	-0.15908837	0.15862417	9.37E-04
"32240_at"	0.046313286	0.09004402	-0.050596237	0.37850666	-0.05444622	-0.13572884	-0.01625824
"32241_at"	-0.046242714	-0.45379925	-0.24859333	0.1049366	0.31787205	-0.21173382	0.15121269
"32242_at"	-0.001976013	-0.2654214	0.001976013	-0.34919405	3.7150464	1.1464324	3.2228837
"32243_g_at"	0.04556036	-0.20038176	-0.12495518	-0.16462994	3.3013272	1.425261	3.324098
"32244_at"	-0.18071079	-0.06367254	-0.26281023	0.19007301	-0.08998966	-0.19125175	0.08820677
"32245_at"	0.13782692	0.33198166	0.06649399	0.4655695	-0.13478708	-0.14115238	-0.16282082
"32246_g_at"	0.0719347	0.11429882	-0.10956526	0.40570354	-0.009000301	-0.09089899	-0.22136259
"32247_at"	0.025459766	0.16968536	0.06703901	-0.014258385	0.014258385	0.1702156	-0.059608936
"32248_at"	0.057393074	0.047617435	0.2661338	0.12343836	0.10443592	0.005666733	0.05665636
"32249_at"	0.5699105	0.47518158	-0.50418806	-0.3691349	0.5767174	-0.016907215	-0.1636815
"32250_at"	0.13505316	0.09841728	-0.26332188	-0.20578289	0.102108	-0.13781595	-0.05161667
"32251_at"	0.38428402	-0.076086044	-0.61297226	-0.22647953	-0.18100834	-0.0728941	0.31397438
"32252_at"	-0.114825726	-0.13313293	-0.08813667	-0.006420136	0.008440018	-0.20219326	0.21950579
"32253_at"	-0.012981415	-0.39789724	-0.33954048	-0.02264595	0.061333656	-0.18909931	0.0681591
"32254_at"	-0.08567333	-0.6413994	0.042705536	0.27601433	-0.3340416	-0.08307266	0.25962448
"32255_i_at"	-0.6960554	-1.1004534	-0.8197808	0.09904146	-0.6567054	-0.09904146	0.54499245
"32256_r_at"	-0.002675772	-0.11730456	0.00267601	-0.0622108	-0.022727251	-0.13666272	0.14750528
"32257_f_at"	0.016388416	0.037619114	-0.11020732	0.003764391	-0.27397346	-0.034270763	0.21176434
"32258_r_at"	-0.021466732	0.06421304	-0.28039217	-0.07422161	-0.115489006	-0.19101143	0.041755915
"32259_at"	-0.07396603	-0.2167306	-0.029552937	0.16950703	-0.10368633	0.28348923	-0.04649353
"32260_at"	0.014255524	-0.31268454	-0.26055336	-0.12500095	0.44850063	0.386899	0.38119984
"32261_at"	-0.539135	-0.049994946	0.044639587	0.05467367	-0.46647644	0.038218975	-0.038218975
"32262_at"	-0.14137888	-0.09127569	-0.34126854	0.058762074	0.1431551	-0.008833408	-0.12596703
"32263_at"	-0.007996082	-0.08378601	-0.0546422	-0.042518616	-0.054050446	-0.05546713	0.007996082
"32264_at"	0.13322544	0.21903706	0.02611065	0.00799799	-0.026941776	0.002243519	-0.26599503
"32265_at"	0.22860241	0.1840043	0.17536116	0.005597115	-0.005596638	-0.106545925	-0.07986641
"32266_at"	-0.050616503	0.27446318	-0.1489222	-0.044301033	0.30073738	0.31121302	0.09215212
"32267_at"	-0.16240168	0.015673637	-0.06110096	-0.004314899	-0.13934231	-0.15797806	0.004314899
"32268_at"	-0.005485058	-0.022063017	-0.10659528	-0.039024115	0.17011642	0.06947541	0.005485058
"32269_at"	0.21315575	0.1780262	0.2957611	0.004171372	0.03911686	-0.115890026	-0.22461367
"32270_g_at"	0.23787022	-0.014809608	0.29319477	-0.014027596	0.061398506	0.13993216	-0.09954119
"32271_at"	-0.005660057	0.005660057	0.30930138	0.154665	0.072361946	-0.05599022	-0.13261175
"32272_at"	0.2328577	-0.42236137	-0.90054417	0.44843864	-0.24311352	-0.076833725	0.45393562
"32273_at"	0.01589632	0.046016216	-0.08128834	0.0628109	-0.024049759	0.03312683	-0.06225443
"32274_r_at"	0.3249483	0.40244102	0.057923317	0.026101112	-0.0719738	-0.06813812	-0.053027153
"32275_at"	-0.25513554	-0.001355171	-0.17604017	-0.025841713	3.7200847	1.0598254	1.415792
"32276_at"	-0.32360172	-0.5879936	0.22455215	-0.019395828	0.24521828	0.2567377	-0.02703762
"32277_at"	-0.02401328	0.42839956	-0.18181252	0.008766174	0.001357794	-0.11481595	-0.04911399
"32278_at"	-0.03851509	0.013134003	0.07187271	-0.037180424	-0.15363026	-0.1247077	0.07376957
"32279_at"	-0.14347124	0.27769566	0.050887108	0.008859634	0.20372963	-0.008859634	-0.044479847
"32280_at"	-0.006756544	-0.09819746	0.3060584	0.119657755	-0.06837344	-0.3602352	-0.100761175
"32281_at"	0.21263742	0.18023968	0.20949745	0.12992954	-0.0652504	0.29188776	-0.050466537
"32282_at"	0.11541653	0.113378525	0.34027195	-0.046132088	0.08105469	0.046132088	-0.13076591
"32283_at"	0.14456844	0.44963455	0.15333939	-0.020944595	0.43393183	0.76666737	-0.21387815
"32284_at"	0.09604025	0.20197678	0.18916607	-0.057828426	0.026544094	0.09145117	-0.27901602
"32285_g_at"	0.13593149	0.07473183	0.08820343	0.1879015	0.1667304	0.3292122	0.035065174
"32286_at"	0.18488312	0.03908634	0.11852646	0.04623413	0.025781631	-0.11717844	-0.22740698
"32287_s_at"	0.24169779	1.4362407	-0.04916525	-0.1277895	0.19417572	0.3788743	-0.15689087
"32288_r_at"	-0.016154528	0.00118041	-0.00118041	0.014919758	-0.18333054	-0.0845139	-0.036957264
"32289_at"	0.13192654	0.38224554	0.001285553	0.020401955	-0.11444998	-0.03374195	-0.001585007
"32290_at"	-0.043581963	0.15003395	-0.01740694	-0.00935936	-0.08100891	-0.08592653	0.00935936
"32291_at"	0.29257298	0.007655144	0.35886478	-0.085496426	-0.081513405	0.11422825	-0.48960257
"32292_at"	-0.0805583	0.19390392	0.059254646	0.05705166	0.03850031	-0.11968708	-0.14752579
"32293_at"	0.16797161	-0.08281422	-0.34667635	-0.16613674	0.01819992	0.13639641	-0.105555296
"32294_g_at"	0.15714097	0.35554767	-0.055004597	0.094661	0.22567058	0.00382638	-0.09806514
"32295_at"	0.33447933	0.2551651	0.29857922	0.13424683	-0.038583755	-0.08032322	-0.26990223
"32296_at"	0.26233435	0.10611868	0.11527634	0.08223963	0.008920193	-0.002778053	-0.1617117
"32297_s_at"	0.049924374	1.3842268	-0.08415747	0.051726818	-0.17798948	0.16153812	-0.047903538
"32298_at"	-0.016818047	0.22225022	0.18856311	-0.08085942	0.06386757	0.12560678	0.016817808
"32299_at"	0.12271595	-0.002990246	-7.14E-04	0.09615517	0.03114748	-0.05426073	-0.15986443
"322_at"	-0.13102102	0.11913252	-0.007584095	0.07271719	-0.16917944	-0.054814816	-1.49E-04
"32300_s_at"	0.110048294	-0.004164696	0.099680424	0.04560852	0.0681963	0.004164696	0.15658808
"32301_at"	0.27624035	0.20156956	0.04561186	-0.005197048	-0.069214344	0.13955736	-0.075733185
"32302_g_at"	0.05316782	0.25133133	0.004640102	-0.050061703	-0.009224892	-0.050778866	-0.13981152
"32303_at"	-0.020727634	-0.08528137	-0.0962863	-0.10146046	0.26885748	0.07707882	-0.0539093
"32304_at"	0.1178689	-0.14915276	0.12241459	-0.002423286	-0.0840292	0.07380438	0.08371353
"32305_at"	1.2344437	1.9623346	-0.3998375	0.26453924	-0.017354965	-0.20404577	-0.3580284
"32306_g_at"	1.3553128	2.771779	-1.1470871	0.044198513	-0.5694318	-0.19417763	-0.3631258
"32307_s_at"	2.0963893	2.6710777	-0.4548874	0.3548975	-0.09561491	0.09561491	-0.5155897
"32308_r_at"	0.33243513	0.07296896	0.2493496	-0.1014719	-0.36339855	0.07920742	0.15916443
"32309_at"	0.033982992	0.2567637	-0.07627654	-0.16320276	-0.08243799	0.034044504	-0.082209826
"32310_f_at"	-0.24868011	-0.22322607	0.082632065	-0.058315754	-0.0202775	0.078783035	0.001426697
"32311_r_at"	-0.15110683	-0.012040615	0.22650099	0.078289986	-0.017748833	-0.11538458	-0.19008303
"32312_at"	0.17029905	0.27771854	0.049972057	0.05468273	0.002686024	0.21549034	-0.03972578
"32313_at"	0.35223198	0.30595398	-0.096707344	0.29546404	0.20842218	-0.15984869	-0.18164396
"32314_g_at"	0.36742926	0.34347582	-0.5437312	0.7209296	0.41502857	-0.09948015	-0.049877644
"32315_at"	-0.7536154	-0.66036797	-0.1877451	-0.009863853	0.38894844	0.057590485	0.14521885
"32316_s_at"	-0.33552647	-0.069618225	-0.18546677	0.27143097	0.8021908	0.08031559	0.066596985
"32317_s_at"	0.073637486	2.306097	-0.07363701	-0.43085432	0.5880661	0.3096304	-0.4247718
"32318_s_at"	0.056915283	0.26975822	-0.06566334	-0.15512085	-0.13439465	-0.3388481	0.27487564
"32319_at"	0.011358261	0.14441013	-0.11701584	-0.095564365	0.026518822	-0.061347485	0.018773079
"32320_at"	-0.039407253	0.18657255	-0.20739508	0.005094528	-0.15817308	0.020928383	-0.005094528
"32321_at"	0.76073265	-0.31814957	-0.58091927	0.20499134	0.017697334	-0.6479955	-0.002353191
"32322_at"	0.15235901	0.09698439	0.2767644	0.07020283	0.08634615	-0.035607338	-0.35275602
"32323_at"	0.20643854	0.2131362	0.06137991	-0.0916872	0.021630764	0.13410807	-0.025668621
"32324_at"	0.35286617	-0.69515896	0.4494419	0.028242111	-0.40650558	-0.35629177	-5.77E-04
"32325_at"	-0.008563995	0.111857414	0.18904066	0.013502598	-0.06841087	-0.049978733	0.006381989
"32326_at"	-0.34740448	-0.006074905	0.1214385	0.00501442	-0.31093454	-0.2266078	0.015962124
"32327_at"	-0.009234905	0.009234905	-0.03841257	0.09128618	0.34071255	-0.021964073	-0.31339836
"32328_at"	0.31156063	0.22704124	0.2492261	0.043533325	-0.00958252	0.26802588	-0.14446306
"32329_at"	0.023182869	0.10243511	-0.07176542	0.003073216	-0.1720066	-0.003073216	-0.09141064
"32330_at"	-0.2906742	-0.002057076	0.48553562	-0.3796196	0.002057076	0.045147896	-0.16606236
"32331_at"	0.023564339	-0.2454319	-0.20838499	-0.14405155	0.048734188	-0.023564339	0.13935328
"32332_at"	0.044244766	0.49570608	0.15909338	-0.04424429	0.10853529	-0.08965254	-0.15112686
"32333_at"	-0.005781651	0.012156963	-0.10274172	-0.15681648	0.14556932	-0.13657427	0.005781651
"32334_f_at"	0.35171127	0.09930515	0.02908516	0.3778305	0.031416893	-0.3258562	-0.31191444
"32335_r_at"	0.28151703	0.2808981	-0.46012402	-0.012324333	0.2995453	-0.3187523	-0.0806694
"32336_at"	0.77253723	0.087571144	0.030561447	0.25231552	-0.38424683	-0.027827263	-0.06681156
"32337_at"	-0.3986206	-1.9326019	0.07645607	-0.011706352	0.118658066	0.015234947	0.09011078
"32338_at"	0.32322407	-0.38734007	-0.09853339	0.51435995	-0.1933744	-0.2433374	-0.03930378
"32339_at"	0.07039976	0.07093239	-0.017436028	0.021066666	0.077619076	-0.1054225	-0.065527916
"32340_s_at"	-0.03477764	-0.49354553	0.5156517	0.051490784	0.100115776	-0.40595055	0.03477764
"32341_f_at"	-0.41503048	-0.2637949	0.10950279	-0.13220978	0.11818886	0.017374039	0.102612495
"32342_at"	0.13797808	0.10521221	0.2537198	0.035402298	0.071324825	0.06346512	-0.36615324
"32343_at"	-0.004616737	0.2061472	-0.029292583	-0.1729784	0.034353256	0.2235136	-0.6684971
"32344_r_at"	0.16644883	0.25956202	0.106760025	0.10403514	0.25688386	0.2605691	-0.14126492
"32345_at"	-0.007795811	0.6850848	0.81501293	-0.10801792	-0.10711479	0.08847237	-0.1207633
"32346_at"	0.137609	0.078540325	0.08364725	0.038508892	-0.09804821	-0.21102905	-0.023858547
"32347_at"	0.21229362	0.13363934	-0.04906273	0.08398867	-0.10333443	0.10189676	-0.24696255
"32348_at"	0.14957047	0.027296305	0.2565751	0.20249033	-0.07280707	0.013264895	-0.11832023
"32349_at"	0.05148363	0.21698141	-0.08620739	-0.026499748	0.25415516	-0.001450062	-0.18073082
"32350_at"	-0.03758073	0.00101614	-0.4564917	0.10694599	0.020145416	-0.16290998	0.08291006
"32351_at"	0.2454791	0.25439453	0.2884693	0.12715197	0.15398169	0.08904505	-0.1052742
"32352_at"	0.038755417	0.053708076	0.22335339	0.02326107	0.26508427	-0.02326107	-0.16802025
"32353_at"	-0.12168741	0.39609146	-0.007579804	0.007445335	0.26298332	0.3385291	-0.09102154
"32354_at"	0.11798239	0.005369186	-0.2429471	0.001017571	-0.28015137	0.13249636	-0.11239815
"32355_at"	-0.17118263	0.15509701	-0.080322266	-0.19745016	-0.31014538	-0.23330212	0.05412388
"32356_at"	0.44273996	-0.030116558	0.51462936	-0.06307602	-0.10986376	0.19601536	-0.04389429
"32357_at"	0.015935898	0.26182508	0.44899368	-0.020006657	0.15931559	-0.14362764	-0.058017254
"32358_at"	-0.02255106	-0.015910625	-0.18178773	-0.12733412	0.2132721	-0.006557941	0.06820965
"32359_at"	0.15922284	0.28253102	0.1296742	-0.11017847	0.1221745	0.08001757	-0.043014765
"32360_s_at"	0.18908405	0.14471102	0.14126539	0.0233531	0.012579441	0.05874729	-0.037667274
"32361_s_at"	0.036174297	0.10252333	0.010221005	0.015484333	-0.21641159	-0.22609901	-0.20082474
"32362_r_at"	0.26461458	0.4331398	0.41531658	-0.024057388	0.0848937	0.48397446	-0.023937225
"32363_at"	0.14516258	0.22858572	-0.29050112	-0.24728394	0.4995494	-0.055010796	2.0949192
"32364_at"	0.8578801	0.3106947	0.06218052	0.5993562	-0.09415197	-0.09917736	-0.32077837
"32365_at"	-0.021027088	0.13532972	0.14609718	0.047243595	-0.20575666	-0.22805691	-0.035449028
"32366_at"	0.16225052	0.2626891	0.22600651	0.12170076	0.2073183	0.21136808	-0.19352722
"32367_at"	0.18092918	0.056898117	0.025377274	-0.022164822	-0.09404373	0.041126728	-0.11660671
"32368_at"	-0.29773712	0.305768	0.01108408	-0.41950154	0.5181627	-0.01108408	0.6882844
"32369_at"	0.06272173	-0.019855976	0.070105076	0.043919563	-0.053598404	0.077810764	0.003388405
"32370_at"	0.19690275	-0.062772274	0.073225975	-0.07806635	0.11770201	0.502357	-0.020653725
"32371_at"	-0.001223087	0.15808916	0.036085606	0.027395725	0.001223087	0.031424046	-0.15978336
"32372_at"	-0.3282547	-0.09083319	0.043463707	0.06641388	-0.31126595	-0.7823272	0.14612293
"32373_at"	0.07978058	0.008203983	0.038761616	0.18698406	-0.005484104	-0.007115841	-4.83E-04
"32374_at"	-0.021887302	0.10840988	0.1267271	0.10210562	0.03015089	0.1529913	-0.1651578
"32375_at"	0.23858881	0.006744385	0.16709995	0.1515665	-0.12066555	0.10593605	-0.17784357
"32376_at"	0.28321123	0.18022919	0.2311759	0.043492794	-0.09734392	-0.06474209	-0.10296345
"32377_at"	0.20273638	0.24753523	0.19702578	0.07108641	-0.004190922	0.115128994	-0.11834097
"32378_at"	0.5732317	-0.18403149	0.2812252	-0.1038599	-0.20178604	-0.08228207	0.033649445
"32379_f_at"	0.16682243	0.08516264	0.15817928	7.86E-04	0.13825274	0.31901407	-0.24727535
"32380_at"	0.24550295	0.029630661	0.4559288	0.009197712	-0.009197712	0.18815231	-0.19817924
"32381_at"	-0.1894331	-0.07158971	-0.05538082	-0.07252431	0.37148285	0.29634953	0.05861783
"32382_at"	0.009360313	0.14158487	0.3002572	-0.009360313	-0.07069349	-0.103450775	-0.10424471
"32383_at"	-0.45739937	-0.53434324	0.1429205	-0.29286575	0.73966837	-0.22787905	0.48579073
"32384_g_at"	-0.33325243	-0.2315116	0.10198784	-0.2790041	0.6298733	0.21489286	0.5488081
"32385_at"	-0.031469345	0.06444025	-0.169559	0.035082817	0.13729429	0.026229858	0.023523808
"32386_at"	-0.16232777	0.029623985	0.12505293	0.055633068	-0.16941261	0.036793232	0.002382278
"32387_at"	-0.11144495	0.16489792	0.27195454	0.002415657	-0.002415657	0.08962202	-0.09406376
"32388_at"	0.20516968	0.41190624	0.39539242	-0.06648731	-0.1653552	0.12334967	-0.07199144
"32389_at"	0.23548985	0.09641361	0.034415722	0.503273	-0.20270777	-0.4418826	-0.20931101
"32390_at"	0.17007875	0.32625675	0.14052248	-0.1448555	0.033643723	0.17567015	-0.10487747
"32391_g_at"	0.299273	0.09582901	0.23533487	0.119526386	0.032776356	0.31073952	-0.23903418
"32392_s_at"	0.04537773	0.13908958	0.07227516	0.1703825	-0.107474804	0.043226242	-0.021637917
"32393_s_at"	-0.29812813	-0.6018405	-0.21000957	-0.02897358	0.6396227	-0.1578064	0.72724724
"32394_s_at"	-0.074632645	-0.16645145	-0.016630173	0.17176437	0.4247675	0.4815483	-0.16175938
"32395_r_at"	-0.013838768	0.11763954	0.30555058	0.013838768	0.44891167	0.39532566	-0.4810295
"32396_f_at"	0.09030771	0.08258915	-0.001420021	0.04755211	0.025363922	0.1410985	-0.32388258
"32397_r_at"	0.10943174	0.27182484	0.33515263	0.005711079	-0.02735424	0.20052433	-0.09298134
"32398_s_at"	0.15037012	0.2492795	-0.066719055	0.005475044	-0.005475044	0.15115118	0.006640911
"32399_at"	-0.05092764	-0.08613157	6.77E-04	-0.19317627	-0.039144516	0.24317694	0.005982399
"323_at"	0.11615753	0.11919594	-0.06706238	0.21545029	0.032025337	0.17801571	-0.05105877
"32400_at"	-0.012699604	-0.3988409	0.0810051	0.027599335	0.18274832	-0.19492912	-0.15793657
"32401_at"	-0.011707783	0.18153238	0.19969368	0.18811798	-0.069579124	-0.041738987	-0.20628881
"32402_s_at"	0.17504549	0.37756014	0.15568447	0.012434959	-0.014334202	-0.04172659	-0.14719248
"32403_at"	0.17369795	0.012881756	0.2688055	0.17111683	-0.36399794	-0.012881756	-0.20440006
"32404_at"	0.3028779	0.0507555	0.16760111	0.27035332	-0.06232834	-0.109529495	-0.056744576
"32405_at"	-0.24739552	-0.19121456	-0.4943571	-0.20005703	0.32846642	0.03978634	0.15837002
"32406_at"	-0.048656464	0.31835175	0.09361601	0.094451904	0.035996914	-0.12293053	-0.27511358
"32407_f_at"	-0.006951332	0.3283682	0.2376337	0.060355186	-0.0078125	-0.11779785	-0.09656334
"32408_s_at"	-0.21641731	-0.098918915	-0.3577361	0.14293098	0.002567291	-0.1330595	0.046393394
"32409_at"	0.015068054	0.21042252	0.15330791	0.0844841	-0.031840324	-0.16521072	-0.18851566
"32410_at"	0.09393501	0.16080475	0.15901375	0.013333321	-0.033328056	-0.26406288	-0.072273254
"32411_at"	0.12261629	0.4657116	-0.016673565	-0.03625679	-0.021831036	-0.1124506	0.040930748
"32412_at"	-0.33871174	0.1875534	-0.007265091	-0.36330795	0.16492653	0.19263649	0.007265091
"32413_at"	0.15323305	0.22333574	-0.30506992	0.091068745	-0.08081436	0.14086962	-0.11579037
"32414_at"	-0.004177332	0.54793215	-0.09107256	0.055003405	0.2268753	-0.06667781	-0.0509789
"32415_at"	-0.066752434	0.039099216	0.026002407	0.04274416	0.06649351	-0.23598218	-0.11324787
"32416_at"	0.02565527	-0.029459	-0.047355175	0.05983448	-0.081026554	-0.13315153	-0.07899189
"32417_at"	0.044665337	0.07147932	0.078663826	0.11058426	0.004912376	-0.004912376	-0.08946276
"32418_at"	0.2872901	0.3368063	0.1577692	-0.04689884	0.15325737	0.22492647	-0.21243382
"32419_at"	-0.13147378	-0.13795543	-0.12870312	0.025702477	0.026527405	0.13202	-0.00617218
"32420_at"	0.65538025	-0.05761385	0.63433075	0.18435335	-0.16600561	-0.14046621	-0.06555748
"32421_at"	0.084126234	0.056609392	0.006461382	0.09764862	-0.051490307	0.029026985	-0.1434133
"32422_at"	0.27792215	0.27245998	0.2824068	0.005854607	0.122103214	0.18960714	-0.15033722
"32423_at"	0.15455437	0.14268112	0.18379974	0.048081398	-0.00271225	0.00271225	-0.14509392
"32424_at"	0.2537632	0.2281003	0.16799068	-0.026774883	0.02677536	0.25666142	-0.07137728
"32425_at"	-0.039380074	0.1044507	0.30565405	0.07117033	0.039380074	0.05731201	-0.30149126
"32426_f_at"	-0.038336754	0.19156122	-0.20922899	-0.24757862	0.028688908	-0.045017242	-0.028688908
"32427_at"	0.099289894	0.21933556	0.22374725	0.005699158	0.023465157	0.3309884	-0.19736052
"32428_at"	0.52910566	0.18608761	0.16052294	0.005086899	0.19594526	-0.23004293	-0.005087376
"32429_f_at"	0.3629985	0.04667902	-0.41522717	-0.117911816	-0.33017516	-0.22977042	0.012794018
"32430_at"	0.001829147	8.38E-04	-0.14948988	-8.38E-04	-0.09126711	-0.17105627	-0.00398016
"32431_at"	0.1323967	0.10802984	0.008929253	0.15947056	0.10350847	-0.018859863	-0.08403015
"32432_f_at"	-0.28497314	-0.79299545	-0.113658905	-0.14655113	0.28572845	0.05643177	0.17256355
"32433_at"	-0.528388	-0.34265232	0.016748905	-5.71E-04	0.005068779	0.040638924	0.07022619
"32434_at"	0.070801735	-1.6163225	-0.066512585	-0.11328316	-0.29858065	-0.24876738	0.52284145
"32435_at"	-0.27109432	-0.2884531	0.20180035	-0.03258896	0.36973953	0.13233185	0.023357391
"32436_at"	-0.37780666	-0.1201725	-0.30385303	-0.10546875	0.33202267	0.09527874	0.27387238
"32437_at"	-0.41434097	0.20316315	0.7133045	-0.016405106	0.050253868	0.016405106	-0.06845093
"32438_at"	-0.20649242	-0.5777197	-0.10023403	0.21065712	0.026508331	0.04031849	-0.04526615
"32439_at"	-0.003646374	0.06321478	0.037414074	0.004086018	-0.051243782	0.10655737	-0.03978634
"32440_at"	-0.444705	-0.7937908	0.12141323	0.50298595	0.3255806	-0.1059494	0.1165514
"32441_at"	0.19743633	-0.07138872	0.4675851	0.38847637	-0.060611248	0.059236526	-0.24699569
"32442_at"	-0.14123869	0.51425266	-0.00712347	0.027477741	0.094008446	-0.2545967	-0.2044549
"32443_at"	-0.101611614	-0.020169258	0.003976345	-0.003976345	0.050437927	-0.1510663	-0.007482529
"32444_at"	-0.25240707	-0.30948353	0.4702015	0.49034023	-0.009812355	0.15796757	-0.037059784
"32445_at"	0.16289902	-0.18880272	-0.14491749	0.005450249	0.029016972	0.07888889	-0.13659811
"32446_at"	0.10265541	0.32563257	0.016868114	-0.016868114	-0.17853594	-0.11423826	-0.17655897
"32447_at"	-0.11039543	-0.04083252	0.004695892	-0.09171915	0.046336174	0.03783369	0.08739805
"32448_at"	0.1503067	0.11041784	0.13329697	0.09747839	0.07001066	-0.008968353	-0.19193792
"32449_at"	0.30631065	-0.06412554	0.18824577	0.02834177	0.0565691	-0.093801975	-0.18031693
"32450_at"	0.14659142	0.36178088	-0.0717392	-0.08954668	0.11024737	-0.003084183	0.020151377
"32451_at"	0.22042418	0.020302773	-0.020302773	0.106734276	-0.3084483	0.06698418	-0.17380857
"32452_at"	-0.005243301	0.15973759	0.06721783	-0.028739452	0.011737824	0.058810234	-0.031696796
"32453_at"	0.13182163	0.30041122	0.010942936	0.11567974	-0.13499594	0.012011528	-0.11570501
"32454_at"	0.19784927	0.2067709	-0.10825038	-0.1593597	0.058409214	0.18167543	-0.020111322
"32455_s_at"	0.2941165	0.19037867	0.09977579	0.15316772	-0.2266717	-0.099775314	-0.17940903
"32456_s_at"	0.3211856	0.32931185	0.48746777	-0.043414593	0.120346546	0.22799158	0.04620552
"32457_f_at"	0.12509298	0.196558	-0.15894222	0.039756775	-0.03344822	0.028335571	-0.23253918
"32458_f_at"	0.12673712	0.20300102	-0.04232359	0.13223648	-0.011969566	-0.08651829	-0.24537182
"32459_at"	0.16158342	0.044870377	-0.00648737	0.00648737	-0.106891155	-0.019733906	-0.1287899
"32460_at"	-0.054410458	0.2083683	0.003614426	0.17894411	-0.16636515	-0.24846649	-0.056212425
"32461_f_at"	0.07369423	0.17942095	0.060606956	0.017717838	-0.096410275	-0.1761322	-0.112139225
"32462_s_at"	0.010234833	0.50535583	0.23836422	0.034059048	0.1920166	0.2576623	-0.055692196
"32463_at"	0.19655037	0.03485775	0.20050144	0.107656	0.002689838	-0.002690315	-0.011357784
"32464_at"	-0.09677458	-0.029129028	-0.06379938	0.104801655	-0.170187	-0.19130325	0.029128551
"32465_at"	0.052012444	0.17181873	-0.20594978	0.049051285	0.014639854	-0.1775384	-0.08635235
"32466_at"	-0.6862345	-0.009340286	-0.03323078	0.1424675	-0.026258469	-0.056167603	0.08824539
"32467_at"	-0.072128296	0.37998676	0.17783546	0.028636932	0.25632858	-0.12020159	-0.089869976
"32468_f_at"	0.081487656	0.11380482	-0.011304855	0.01937151	0.06465101	-0.055902004	-0.13359404
"32469_at"	0.29282284	-0.029806137	0.29861975	0.2234559	-0.03594017	0.31327486	0.016129494
"32470_at"	-0.017770529	-0.010996819	0.06134081	0.010996819	0.08466506	-0.04183197	0.08078551
"32471_at"	0.004577875	0.22666478	-0.020141125	-0.11259866	-0.06371498	-0.0901804	-0.003223658
"32472_at"	0.104151726	0.10739994	0.010126114	0.12448406	-0.09109211	-0.04775858	-0.10650158
"32473_at"	0.071624756	0.026804924	0.081659794	0.09590387	-0.06904411	-0.17110682	-2.89E-04
"32474_at"	0.11320782	0.1809125	0.16048479	0.02274561	-0.03417778	-0.049762726	-0.010994911
"32475_at"	0.30670977	-2.86E-05	0.09500408	0.1519432	-0.022219658	0.028101921	-0.07466221
"32476_at"	0.07648373	0.13463163	-0.030763626	0.07470226	0.06874132	0.29750538	-0.004198551
"32477_at"	0.10026026	0.1927576	-0.07296467	0.1265912	0.04982853	0.3313017	-0.07813501
"32478_f_at"	-0.1747179	-0.3923421	-0.04883337	-0.013094902	-0.00237608	-0.18803501	0.3877554
"32479_at"	0.03313589	0.07289982	0.17853689	0.11434364	-0.11033869	0.098665714	-0.03313589
"32480_at"	0.11552763	0.07422066	0.18172789	-0.14310122	0.059043407	0.13768005	-0.0918951
"32481_at"	-0.071619034	0.021397114	0.049984455	0.12180996	0.03497696	-0.13141632	-0.15335846
"32482_at"	-7.58E-04	0.13440418	-0.16859627	0.026891232	0.22664881	0.21835327	-0.10675192
"32483_at"	-0.037667274	0.19719124	0.20424128	0.08436251	-0.012493134	0.05602503	-0.23172522
"32484_at"	0.002762795	0.1092906	0.030137062	-0.10602999	0.0631752	-0.20830154	-0.071799755
"32485_at"	-0.43498945	-0.22841692	-0.02291584	1.7717166	0.01705122	0.8577695	0.15913439
"32486_at"	0.061609745	0.13561249	0.18503046	0.009653568	-0.048526287	0.14785385	-0.13709259
"32487_s_at"	-0.2655363	-0.15489101	-0.3234644	-0.011726379	0.087296486	0.011726379	0.111598015
"32488_at"	1.6311421	2.1982775	-0.6386757	0.08457613	-0.15165377	-0.08457661	-0.34893656
"32489_at"	0.10151529	0.045977592	-0.06437349	-0.013535023	0.07022333	0.14742231	0.013535023
"32490_at"	0.2142353	-0.048337936	0.14686823	0.126688	0.041204453	-0.108230114	6.45E-04
"32491_at"	0.03394842	0.19108105	0.11978006	0.003266335	-0.02175188	0.028977394	-0.052631855
"32492_g_at"	0.26735878	0.28926277	0.13808632	0.04839182	0.05009556	0.12045193	-0.1574707
"32493_at"	0.05377865	0.32570457	-0.008018017	0.0840435	0.11387491	0.011943817	-0.3877554
"32494_at"	0.40249777	0.2710786	0.37503242	0.027071	-0.027124405	0.19013357	-0.12666082
"32495_at"	-0.01565504	0.171175	0.06656456	0.0353446	0.23687887	0.23598862	-0.0881238
"32496_at"	0.046993732	0.024772167	0.10472298	0.12302208	-0.1378274	0.014478684	-0.09703541
"32497_s_at"	-0.025857925	0.050144672	-0.01048851	0.046390057	0.11296177	-0.11829662	-0.08098316
"32498_at"	0.09016991	0.1857605	-0.004245758	0.011392593	0.004245758	-0.06263161	-0.116270065
"32499_at"	0.16006565	0.06582546	0.4432726	-0.004214287	0.023611069	-0.091576576	-0.046426773
"324_f_at"	-0.24646568	-0.07649517	-0.08925152	-0.010921478	0.37655067	0.13780212	0.11938572
"32500_at"	0.075056076	0.282022	0.003994465	-0.003994703	-0.108196974	0.19058442	-0.123574734
"32501_at"	0.3348055	-0.47955656	-0.30905533	-0.10583162	-0.0646739	0.052937508	0.15301704
"32502_at"	-0.039083004	0.39170265	0.10684919	-0.004618645	0.10049057	0.004618168	-0.08825588
"32503_at"	0.0398674	-0.037844658	0.34450722	0.001218319	-0.13440323	-0.25498772	0.009884357
"32504_at"	0.09236717	-0.08509779	-0.15336037	-0.13737154	-0.028158188	-0.08963013	0.06880617
"32505_at"	0.1083498	0.23926306	0.34418058	-0.013932228	0.017104626	0.2157507	-0.114953995
"32506_at"	0.14251852	0.003063679	-0.11786175	-0.013669968	0.14644432	0.25715017	0.10225916
"32507_at"	0.14732409	0.26333714	0.13235188	0.14233828	-0.014866829	0.014866829	-0.08623457
"32508_at"	0.09839535	-0.7133751	-0.9782424	-0.202178	-0.15351868	-1.039576	0.20799494
"32509_at"	0.19059038	-0.3098173	0.022722721	0.20607948	-0.19264841	-0.38750935	0.1269331
"32510_at"	0.24506998	-0.7829814	-0.14774561	-0.011248589	-0.1670456	0.14778662	0.035137653
"32511_at"	-0.011171341	-0.17995882	0.3644371	-0.112056255	-0.23007917	-0.03534794	0.011171341
"32512_at"	-1.2352357	-0.7417073	-0.15940332	-0.98276854	0.25344563	0.8389592	0.8028116
"32513_at"	-0.017350197	0.05919552	0.114566326	-0.010734558	-0.18514681	-0.12392187	-0.08490801
"32514_s_at"	-0.13512278	-0.06429291	0.16719866	-0.112205505	0.30391216	0.51134396	-0.028439999
"32515_s_at"	0.12377167	0.23553038	0.23178482	0.14991951	-0.011083603	-0.09507561	-0.27148104
"32516_at"	-0.020912886	0.32285833	-0.04627371	-0.14973831	-0.20255089	-0.083768845	0.004767895
"32517_at"	-0.1743331	-0.17464924	-0.004831314	0.004831314	-0.031486988	-0.21506739	0.08371019
"32518_at"	0.043845177	0.101641655	-0.46116114	-0.22149754	0.38783312	0.30494595	-0.03604269
"32519_at"	0.03008318	0.056485176	0.005011559	-0.005011559	0.14452934	-0.10779047	-0.1102829
"32520_at"	0.28692913	0.3796358	0.3995037	0.0302639	0.07516098	0.41838932	-0.0302639
"32521_at"	0.39970398	-0.23085976	-0.2615342	-0.16040802	0.31098223	-0.10829115	-0.018102646
"32522_f_at"	-0.49184275	-0.08234453	-0.07622433	-0.016277313	0.070874214	0.44910192	0.35031748
"32523_at"	-0.833447	-0.08204508	-0.032268524	-0.03965187	0.29090405	0.64838886	0.725729
"32524_s_at"	0.18547583	0.07563019	0.5100188	-0.043845177	0.15588617	0.30529737	0.010896206
"32525_r_at"	0.012429237	0.09901428	-0.09153652	0.002432823	0.03715515	0.005008698	-0.12242603
"32526_at"	-0.010932922	-0.42946053	-0.39472723	0.010933399	0.2686329	0.090578556	0.24655819
"32527_at"	-0.030020237	-0.17720318	-0.1230011	0.31239748	0.25093937	0.49038887	0.030020237
"32528_at"	0.09311962	0.73145485	0.30994797	-0.09894943	0.19758606	0.23681927	-0.16373014
"32529_at"	0.16079712	-0.21458626	0.050102234	0.13674164	0.16595936	-0.037537575	0.012526512
"32530_at"	-0.25416374	-0.9256687	-0.66172504	0.33891106	-0.37649822	-0.11042118	0.42360497
"32531_at"	0.001097679	-0.80346155	-1.2436361	-0.99319124	-0.001097679	0.53825283	1.013268
"32532_at"	0.0290699	0.2005496	0.28058815	-0.037590027	0.001549244	-0.001549244	-0.21820498
"32533_s_at"	0.21614695	0.23189402	-0.05714321	-0.02559185	0.08308172	-0.023972511	-0.10330963
"32534_f_at"	0.004290104	0.11714935	-0.054592133	-0.029630661	0.15467834	-0.036497593	-0.121593475
"32535_at"	-0.1430211	0.24496889	0.001484871	-0.20275688	0.25120783	-0.022298336	0.113796234
"32536_at"	-0.15949678	0.18353462	0.18179989	-0.25341988	0.06872082	0.22721338	0.025367737
"32537_at"	0.1735487	0.1092267	0.32401943	0.059499264	0.01276207	-0.20670986	-0.07716942
"32538_at"	0.09981537	-0.046947956	0.046947956	-0.24670315	0.49725294	0.51146984	0.20073843
"32539_at"	-0.12227249	-0.17240381	-0.02866888	-0.1823144	-0.27051306	0.020811558	0.18365765
"32540_at"	-0.033239365	0.050328255	-0.10363674	0.058979034	-0.1442008	-0.21641731	-0.13128424
"32541_at"	-0.05949354	0.12522697	0.12980127	-0.008372784	-0.10954332	0.30466843	0.11342764
"32542_at"	0.212883	-0.8466749	-0.13731766	-0.15237474	-0.05335903	-0.13489723	0.49973488
"32543_at"	-0.074067116	0.056238174	-0.10203171	0.048840523	-0.23330879	0.1902399	-0.005142212
"32544_s_at"	0.2890973	0.5178981	-0.011213779	0.030811787	-0.006359577	-0.07364464	0.051635742
"32545_r_at"	-0.106808186	0.2712283	-0.099137306	-0.31181526	-0.31675005	-0.30196142	-0.039900303
"32546_at"	0.014567852	-0.020768166	-0.16636658	-0.022543907	0.039251804	0.31738663	0.0909729
"32547_at"	-0.012693405	-0.17583942	0.12376833	0.33214235	0.047673225	-0.16011143	-0.09720421
"32548_at"	-0.020184994	-0.94303703	-0.0874753	0.74601793	-0.15111923	-0.6229787	0.10844469
"32549_at"	0.31812048	0.17287683	0.057082653	-0.036042213	0.04440689	9.53E-04	-0.177742
"32550_r_at"	0.08230114	0.11344242	-0.05048561	-0.06704521	0.027415276	0.20525551	-0.17030907
"32551_at"	-0.024329662	-0.07598591	0.12544727	-0.11253643	0.6156602	0.18448544	0.024329662
"32552_at"	-0.28353262	0.1035347	-0.1035347	-0.407207	5.2667656	3.6621819	4.011673
"32553_at"	-0.15326309	0.26028728	-0.21199608	0.101332664	-0.16208935	-0.15246582	0.005040169
"32554_s_at"	-0.5502782	-0.81026983	-3.17E-04	-0.48828983	0.7089548	0.39099646	1.0503597
"32555_at"	0.07580185	0.14334154	0.2700591	-0.22617197	0.42071867	0.16214752	0.026877403
"32556_at"	0.014311791	0.13044167	0.4005742	0.055379868	-0.26739883	-0.16225147	-0.21490765
"32557_at"	-0.03909874	0.13230896	0.083496094	-0.011177063	0.06362724	-0.15122032	-0.17055035
"32558_at"	0.07817316	-0.13513803	-0.23516607	-0.21207237	0.21491241	0.07969141	-2.65E-04
"32559_s_at"	-0.052029133	-0.006641865	0.18167925	-0.103646755	-0.005939484	0.26711416	0.09339857
"32560_s_at"	-0.14139938	-0.004108429	-0.1459074	0.018742561	0.09222412	-0.099342346	0.002251625
"32561_at"	-0.16411495	-0.3856697	0.3412571	-0.37516212	0.115300655	0.21527863	0.47979164
"32562_at"	0.52532196	0.14259768	-0.12390566	0.033872604	-0.009047985	-0.18080902	-0.264925
"32563_at"	1.7912159	-0.15090609	-0.47582912	-0.7366123	1.389389	-0.3955841	3.0058603
"32564_at"	-0.49845982	-0.09828186	-0.025780678	-0.08837795	0.25179005	-0.001263619	0.23651981
"32565_at"	0.3541298	-0.39922667	-0.6476426	0.49447203	0.17958117	0.79914236	-0.06150198
"32566_at"	0.011833191	0.65518665	1.0065737	0.73444366	-0.3517952	-0.06529236	-0.12524033
"32567_at"	0.03418827	0.06809902	0.19259453	-0.18853521	-0.032627106	0.30541897	0.050780296
"32568_at"	0.09225273	0.1961441	-0.13965464	0.07603073	0.10193205	0.06249857	-0.25548744
"32569_at"	0.018973827	-1.0145421	-0.52941084	-0.018973827	-0.3094902	-0.16494083	0.1779151
"32570_at"	-0.16685104	-0.20457578	-0.08231974	-0.18361783	0.026418686	-0.2174573	0.9380646
"32571_at"	0.2861538	0.035690784	0.02721262	-0.30795908	-0.20977974	-0.103832245	1.1566172
"32572_at"	0.12947941	-0.87764215	-0.647511	0.004318714	-0.004318237	-0.1367135	0.3164916
"32573_at"	-0.2804556	-0.6276512	-0.33154964	0.3855543	0.094270706	-0.16994762	0.29273605
"32574_at"	0.011203289	0.20897913	-0.59006166	0.2944951	0.05236435	-0.15794373	-0.011203289
"32575_at"	-0.09003639	0.033031464	-0.35463047	-0.008515358	-0.018063545	0.11135864	0.102246284
"32576_at"	-0.48423195	-0.19527006	-0.4072771	-0.12568426	0.36960888	0.09392452	0.2845335
"32577_s_at"	0.00929594	0.19135046	0.2203517	0.015796661	0.10294056	0.21262646	-0.104180336
"32578_at"	0.118878365	-0.28995275	-0.006295204	-0.006238461	-0.002766132	0.1995883	-0.041710854
"32579_at"	0.05498886	0.3476534	0.25257874	0.04545498	0.13347721	0.12600231	-0.4294653
"32580_at"	0.068351746	-0.013155937	0.13917637	0.013155937	0.020658493	-0.071816444	-0.1416626
"32581_at"	-0.08537674	-0.14672756	-0.17608976	0.26937914	-0.057996273	-0.28615665	0.07126045
"32582_at"	-0.11164284	0.6434126	0.20805407	1.5193276	0.19453335	-0.022868156	-0.016954899
"32583_at"	-0.04279518	0.11262941	0.04279518	-0.12504148	0.136487	-0.11048126	0.31777
"32584_at"	-0.07163191	0.0435791	0.27189827	-0.08933926	0.052663326	0.112939835	0.10167265
"32585_at"	0.2581029	-0.696609	-0.63511705	-0.13051748	0.13051748	-0.38163614	0.4374137
"32586_at"	0.06522751	-0.5648017	-0.05956173	0.098713875	-0.13625288	-0.20859146	0.025650024
"32587_at"	0.03585577	-0.009074688	-0.22279882	-0.21874332	0.48699236	0.13774252	1.1770887
"32588_s_at"	0.056761265	0.032119274	-0.3501215	-0.69401693	0.36402702	0.16466284	1.0413227
"32589_at"	-0.3720169	0.035270214	0.21647167	0.09413338	-0.06889486	0.44581318	-0.22749329
"32590_at"	-0.7442198	-0.40869808	-0.20897293	0.06759453	-0.23282146	0.12256718	0.20491314
"32591_at"	-0.3283348	0.35191154	-0.34766865	0.015678406	-0.12847328	-0.015678406	0.037026405
"32592_at"	0.003057003	0.39920902	0.097515106	0.0926981	-0.03633833	-0.17334461	-0.13642979
"32593_at"	0.006835461	-0.006835461	1.1445227	-0.12910223	-0.14560604	-0.47553158	-0.021045685
"32594_at"	0.013266563	-0.26407766	-0.18994951	-0.03358507	-0.081150055	-0.009399891	0.07239437
"32595_at"	-0.028002262	-0.8437896	-0.6298833	-0.091319084	0.028001785	0.2870221	0.2249608
"32596_at"	0.33117533	0.19756222	-0.10565257	0.20646763	0.13135147	0.14421749	-0.31778693
"32597_at"	-0.5248542	-0.28723335	-0.06221199	-0.19312954	-0.006563187	-0.4347763	0.41404724
"32598_at"	0.14528179	0.6583786	0.035290718	-0.035290718	-0.74694633	-0.7612829	-0.4333706
"32599_at"	-0.33769488	-0.06851959	0.039021492	0.061890602	0.07808542	-0.039021492	-0.07053566
"325_s_at"	0.13553381	-0.062464237	-0.056582928	-0.04341936	0.053352356	-0.19215965	0.02947712
"32600_at"	0.4720869	0.09942007	0.23292398	0.11907673	-0.103019714	0.26210642	-0.04358864
"32601_s_at"	0.3185892	0.35994768	0.28038836	0.05564165	0.2766695	0.004800797	-0.04481268
"32602_at"	0.23844433	0.037442684	-0.36536407	0.16438723	-0.237216	-0.0221138	-0.05904293
"32603_at"	-0.056076527	0.19563293	0.20909977	0.062068462	0.23802662	0.2628007	0.30624104
"32604_s_at"	8.17E-04	0.066188335	0.15466928	0.057978153	-0.06872034	-8.17E-04	-0.3573203
"32605_r_at"	0.061844826	0.044516325	-0.042200327	-0.06787062	0.012131691	0.009408712	-0.19120693
"32606_at"	0.7109566	-0.26173162	-0.31490088	-0.53165627	0.72691345	0.2597003	0.095825195
"32607_at"	1.0154161	-1.5493374	-2.3831716	-0.8658428	0.7382345	-0.014972687	0.014972687
"32608_at"	6.93E-04	0.11295462	0.12927246	0.06439924	-6.93E-04	-0.13148355	-0.1278305
"32609_at"	0.30196762	0.26239014	0.35521793	0.045178413	0.49932384	0.79639053	-0.045178413
"32610_at"	-0.2651186	-0.21458435	0.48113298	-0.20798588	0.24489403	0.16925478	0.039519787
"32611_at"	3.78E-04	-1.1348915	-0.18841171	0.26621628	0.1387415	0.059217453	-0.13122272
"32612_at"	-0.28617954	-0.08132553	0.17611599	-0.08447313	0.2827115	-0.10295296	0.06349039
"32613_at"	-0.03836727	0.18935585	-0.18557549	0.08371353	0.008897305	0.05329132	-0.008897305
"32614_at"	-0.083194256	-1.0320215	-0.60171604	-0.6543431	0.12382221	1.0129623	0.8143821
"32615_at"	-0.007862568	-0.8700924	-0.08423662	0.17015743	-0.0552454	-0.4720707	0.27380514
"32616_at"	-0.23171854	-0.332345	-0.5397463	-0.17523289	0.27958632	-0.07119036	0.31075764
"32617_at"	-0.008768082	-0.012558937	-0.04213953	0.046111584	0.18795681	-0.12021923	-0.18339634
"32618_at"	0.08144951	-0.09879446	-0.119898796	0.1325407	0.08996296	-0.13843918	0.07164192
"32619_at"	0.004776955	0.01950407	-0.29178286	0.10498953	0.08236027	-0.09157324	-0.13510942
"32620_at"	0.049646378	0.057587147	-0.02306509	0.15148735	0.010801792	0.33975983	-0.17918777
"32621_at"	0.15701056	-0.05464983	0.29601955	-0.041685104	0.100354195	0.001360416	-0.10145903
"32622_at"	0.030241966	0.42281914	0.39620113	0.07611561	-0.030241966	-0.07787132	-0.06797123
"32623_at"	0.4814453	-0.7684541	-0.2710123	-0.09134102	0.07254982	-0.054053783	0.05405426
"32624_at"	0.028673172	-0.41749144	-0.55050707	0.74103165	-0.40010118	-0.49585295	0.20778704
"32625_at"	0.26128054	-0.2731948	0.024355888	0.22470093	0.11035824	-0.03677225	-0.042681217
"32626_at"	0.02985096	-0.56757545	-0.112080574	-0.17140436	-0.26662445	-0.25051308	0.8166113
"32627_at"	0.29809523	-0.019854069	-0.026034355	0.16404533	-0.016531944	0.030435085	0.02995634
"32628_at"	-0.47528505	-0.66497517	-0.31476736	0.00807476	-0.14617205	-0.15554237	0.6027427
"32629_f_at"	0.32322598	0.06350708	0.47602177	-0.07436466	-0.06350708	-0.27270412	-0.20611668
"32630_f_at"	0.16328335	0.08572006	0.27513123	-0.07436371	0.15945148	0.55764055	-0.18888903
"32631_at"	0.11655235	0.31597137	-0.034372807	0.116281986	0.3296976	0.3191843	-0.21352625
"32632_g_at"	0.27215958	0.2077322	-0.08495045	0.43613148	-0.040874004	0.13551521	-0.0951848
"32633_at"	-0.07295847	-0.2675023	-0.082930565	0.36133003	0.057831764	-0.061608315	0.06662083
"32634_s_at"	0.057186127	0.05585003	0.5323992	0.2721634	-0.110188484	-0.097225666	-0.04567194
"32635_at"	0.3635826	-0.24178553	-0.17580748	0.03242874	0.25096416	-0.17652082	0.052989483
"32636_f_at"	-0.26630569	-0.45593786	0.054959297	0.054614305	-0.19605136	-0.11191797	0.52152586
"32637_r_at"	-0.013353109	0.058995962	0.039558172	-0.08072138	-0.25673604	-0.07282853	0.3877666
"32638_s_at"	-0.21634412	-0.255522	-0.13503885	0.037433624	-0.13807845	-0.037433386	0.20997
"32639_at"	0.03786564	-0.03786564	0.11123419	0.065357685	-0.059501648	-0.15358973	-0.174294
"32640_at"	0.062506676	0.061611176	0.1682167	-0.10429907	-0.008989811	-0.12989998	0.25696945
"32641_at"	-0.09436369	-0.010656834	-0.102603436	0.044444084	-0.29358625	-0.23585129	0.114014626
"32642_at"	-0.05253887	-0.02449274	-0.016917706	0.02893877	-0.077281475	-0.3181572	-0.007557392
"32643_at"	-0.6952343	-0.005177498	-0.14345932	0.005177498	-0.14952755	-0.16098118	0.20173454
"32644_at"	0.0688982	0.05688095	0.07685566	0.19551468	-0.051558495	0.009552956	-0.08452225
"32645_at"	0.06571102	-0.16636515	-0.10193443	0.16680622	0.025325775	0.37991905	-0.025325775
"32646_at"	-0.13155937	-0.00493145	-0.10384369	0.060771942	0.002739906	-0.06509876	-0.07171059
"32647_at"	-0.11180639	0.4404192	-0.02586174	0.16188145	-0.108698845	-0.3852892	-0.12568665
"32648_at"	-2.4532151	-0.6206455	-0.71523094	-0.060917854	3.3004541	3.2778473	3.3267508
"32649_at"	-0.15866041	0.038928747	-0.022955656	-0.08620119	0.20281935	0.020815134	0.16437292
"32650_at"	0.7958269	-1.1253281	-1.2491531	-0.8736334	-0.01661396	0.7606573	0.3526268
"32651_at"	0.16411543	-0.049378395	-0.0363636	0.25449085	0.118478775	0.08543968	-0.048367977
"32652_g_at"	0.85366964	-0.523674	-0.6275177	-0.38949203	0.007741451	0.66351366	0.3156104
"32653_at"	-0.29846668	0.213233	-0.15937853	-0.1306057	-0.02661705	-0.2311883	-0.06959963
"32654_g_at"	-0.28081846	0.28003883	-0.30655813	-0.20777225	0.05185938	-0.096579075	-0.16284657
"32655_s_at"	0.18217659	0.2882452	0.22684622	0.05537319	-0.14955759	-0.12906313	-0.21116209
"32656_at"	-0.17578506	0.07926917	0.010732889	-0.05332923	-0.018740654	-0.1989491	-0.024564743
"32657_at"	0.06354189	-0.03443861	-0.036369324	-0.015388012	-0.091995716	-0.15825796	0.015388012
"32658_at"	-0.475801	-0.060692787	0.023311615	0.06381893	-0.2174735	0.045010567	-0.12886381
"32659_at"	-0.012592316	0.034206867	0.07666254	0.05354595	-0.004709721	0.15130568	-0.047893524
"32660_at"	-0.13619804	0.093952656	0.006995201	6.07E-04	-0.13965225	-0.09671545	-0.11594391
"32661_s_at"	-0.30213833	-0.38079834	-0.06395388	-0.3416643	0.06395388	0.23072672	0.21731949
"32662_at"	-0.06284189	-0.087809086	0.5547476	0.08090782	-0.38525677	-0.34841013	0.026099205
"32663_at"	0.11582065	0.008569717	0.13772774	-0.087774515	0.09064388	-0.07379508	-0.07795811
"32664_at"	-0.12134695	-0.092460155	-0.13837862	-0.061204433	0.63757324	0.061203957	0.4828248
"32665_at"	0.026004314	-0.7353182	-0.92295647	-0.30317402	0.20568609	-0.5388584	0.81671286
"32666_at"	0.3255911	0.06579447	-0.053606033	-0.16049719	0.014715672	0.029911518	-0.1304555
"32667_at"	0.051757336	-0.46490717	-0.38875008	-0.19408798	0.33751965	-0.051757336	0.8664446
"32668_at"	0.11796522	0.19122219	-0.7732682	0.025709152	-0.41565084	-0.68362045	-0.21790934
"32669_at"	-0.15463781	-0.1735425	-0.11691666	0.023059845	-0.04177761	-0.04514742	0.6484189
"32670_at"	0.4237976	0.26188278	0.041828156	0.09233999	-0.00799942	-0.20297527	-0.21354723
"32671_at"	0.056991577	0.06082678	0.016504765	-0.07802534	0.0989089	-0.13825417	-0.060304165
"32672_at"	-0.09760904	-0.30412292	0.17892456	0.37501812	-0.02619028	-0.20147848	-6.56E-04
"32673_at"	0.08530617	0.2377739	0.26953506	0.030124664	-0.007993698	-0.17106533	-0.2067833
"32674_at"	0.010521889	-0.45739985	-0.44317102	0.08879471	-0.2585435	-0.22400188	0.18281317
"32675_at"	0.03673649	0.15993786	-0.21854877	-0.07858372	-0.059595585	0.37852907	-0.014928818
"32676_at"	0.03408718	-0.3388214	-0.11688185	-0.049245358	-0.23374176	-0.049981117	0.105193615
"32677_at"	0.25710773	0.114414215	0.23766518	0.050894737	0.041155815	-0.04115534	-0.07486868
"32678_at"	0.022607327	0.10022879	0.029588223	-0.09630537	-0.07685375	0.24779463	-0.05196905
"32679_at"	0.21714878	0.24910164	0.12260723	-0.04099846	-0.0383749	3.50E-04	-3.50E-04
"32680_at"	0.24702215	0.14886332	0.16618824	-0.15269661	-0.024946213	0.31520605	0.024946213
"32681_at"	0.10445881	0.2045927	0.009284973	0.16302872	-0.099065304	-0.07748985	-0.09873009
"32682_at"	0.07761383	0.108285666	0.25101185	0.0346148	-0.18135619	-0.17829537	-0.015097141
"32683_at"	-1.29E-04	-0.026813984	-0.021124125	-0.015613556	0.041535378	-0.07286811	-0.081110716
"32684_at"	0.46713352	0.39873838	-0.071837425	0.16102362	0.1493473	0.22172594	-0.14334965
"32685_at"	-0.04184532	-0.41561747	-0.07314491	0.5215807	-0.23708105	-0.11063576	-0.02423668
"32686_at"	0.07778168	0.2857318	0.2365365	0.03229904	0.097503185	0.007196903	-0.09954071
"32687_s_at"	0.043067932	-0.3021102	0.15062666	-0.01982069	-0.015356541	-0.2930441	-0.072953224
"32688_at"	0.06540513	0.35595703	0.002566576	0.004800081	-0.002566576	-0.056862593	-0.025466442
"32689_s_at"	-0.21811914	0.20546103	-0.27691936	-0.061222076	0.057540417	-0.09951782	-0.048975468
"32690_s_at"	0.22763634	0.16818523	0.2991705	-0.022572994	0.0852747	0.022572994	-0.16358757
"32691_s_at"	0.072197914	-0.013747692	-0.1927123	0.013747215	-0.14076662	-0.32498407	-0.11221409
"32692_at"	-0.18104243	0.13620019	-0.10670209	-0.09663081	-0.001152039	0.21706295	0.001152277
"32693_at"	-0.14108181	0.10406017	0.27658796	-0.072915554	-0.24074125	0.17733479	0.12774897
"32694_at"	-0.4836011	0.08282137	-0.10399008	-0.24120045	-0.24855232	-0.23532295	0.010432243
"32695_at"	0.48310757	-0.37042332	0.60883236	0.5591774	-0.3822441	-0.2693596	-0.071858406
"32696_at"	-0.8498492	0.11497116	0.2776947	-0.19576693	-0.56534815	-0.25282907	0.052570343
"32697_at"	-0.31709862	-0.23596859	-0.6399679	0.6827297	-0.21428585	-0.06293678	0.25729656
"32698_at"	0.2799697	0.15789413	0.3914795	-0.019106388	-0.14142704	-0.26377487	-0.2827754
"32699_s_at"	0.10300875	0.028914452	0.056345463	0.12991095	-0.06615257	-0.26896906	-0.17532969
"326_i_at"	-0.68366146	-0.5810871	0.2736969	0.05918026	-0.17832851	0.27446938	-0.16218948
"32700_at"	0.3006611	0.22975826	0.11680269	-0.1658144	0.18236399	0.020583153	-0.020583153
"32701_at"	0.07252693	0.047013283	0.22404575	0.121972084	-0.08442879	-0.23982525	-0.13450241
"32702_at"	-0.1657238	0.003759384	0.045601845	0.028375626	0.046628952	0.19873428	-0.10962582
"32703_at"	-0.003546238	-0.15412998	0.004562855	-0.034611702	-0.10950327	-0.042479515	0.038000107
"32704_at"	0.09380674	0.050293922	-0.096159935	-0.05328703	-0.007452965	-0.19974375	0.018453121
"32705_at"	-0.16405916	-0.015553474	-0.22620773	-0.001905918	0.06409979	0.060521126	-0.047177315
"32706_at"	-0.36054373	-0.28257704	0.18014956	0.3092451	-0.049829483	-0.11824989	0.15204144
"32707_at"	-0.07164574	-0.20106411	-0.22655988	0.09634066	-0.14082742	-0.033311605	-0.044789314
"32708_g_at"	0.28680897	0.006400108	-0.04322481	-0.03210783	0.26807785	0.1982255	-0.2346139
"32709_at"	-0.11923885	-0.04816079	0.47364354	-0.021876335	-0.16115475	-0.17042875	-0.006472588
"32710_at"	-0.07944393	-0.09754181	-0.15169811	-0.056796074	-0.036414146	-0.1418066	0.036414146
"32711_g_at"	-0.008000612	0.2557931	0.2502482	0.08659744	0.042583466	-0.08931947	-0.0581882
"32712_at"	-0.018321514	-0.59897137	0.080513	-0.10069752	-0.5162468	-0.57779884	-0.1014843
"32713_at"	-0.40297127	0.6373067	-0.01623869	0.1664977	-0.1242156	-0.18579817	-0.18345022
"32714_s_at"	0.29017925	0.24615145	0.35177994	0.110099316	0.18117905	-0.03228426	-0.087472916
"32715_at"	-0.19725704	-0.19654703	-0.32914686	-0.043780327	0.71829414	0.45242023	0.4352169
"32716_at"	0.1658907	0.062070847	-0.055226326	0.044107437	-0.21797848	-0.16953325	-0.07130146
"32717_at"	-0.013575554	-0.12282896	-0.003557205	0.10754585	0.008048058	0.25074053	0.056344986
"32718_at"	0.05725336	0.455853	0.113025665	-0.1896367	-0.18119335	0.018840313	-0.058262825
"32719_at"	0.54375124	0.42915297	-0.10723114	-0.0896678	-0.017513752	-0.02128315	-0.1480403
"32720_at"	-0.37731028	0.31217766	-0.075876236	-0.13986778	-0.16850042	0.09780884	0.5293846
"32721_at"	-0.07095957	-0.045171738	-0.21197414	-0.24242115	-0.11541176	-0.24883938	0.14246559
"32722_at"	0.1396184	-0.21567011	-0.1469531	0.29400396	0.258986	-0.10196447	0.17975283
"32723_at"	-0.35384035	0.14314461	-0.015470982	0.019821167	-0.18279171	-0.1764431	-0.04343462
"32724_at"	0.13712263	-0.06763792	-0.21235514	-0.39989328	0.1783042	0.34835625	0.008214474
"32725_at"	-0.11069393	-0.02534914	-0.19036293	-0.057425976	0.11050272	-0.17272902	0.02534914
"32726_g_at"	0.5195193	0.29982853	-0.04048729	0.22987318	0.014697552	0.42955637	0.013868809
"32727_at"	0.11268091	0.17159128	-0.052058697	0.052059174	0.08687496	0.11587763	-0.25490808
"32728_at"	-0.07997465	1.0068321	-0.8853502	0.29178047	-0.5447731	-0.058036327	-0.075461864
"32729_at"	0.22367716	0.18824768	0.20993757	-0.07237005	-0.023958206	0.15305471	0.04494095
"32730_at"	-1.5386724	-0.105032444	-0.22812462	-0.5161171	-0.19788885	0.13737011	0.61760616
"32731_at"	0.023995876	0.695076	-0.04695654	-0.09143877	0.011754513	0.06041193	-0.19139576
"32732_at"	-0.13372278	-0.12509537	0.0200696	0.11303377	0.07698202	-0.19279766	-0.002152443
"32733_at"	-0.0849452	-0.08883047	-0.003417969	-0.091701984	-0.07968569	0.18296528	0.051530838
"32734_at"	-0.3301406	-0.38891888	-0.014895439	0.28024387	-0.24030447	-0.36086893	0.014895439
"32735_at"	-0.02320671	-0.23626089	-0.28610134	0.02320671	-0.07579517	-0.05866289	0.19052553
"32736_at"	0.24951506	0.36004066	-0.19081259	-0.013409138	0.008143902	0.31874657	-0.07741356
"32737_at"	0.03035736	0.173872	0.09902811	0.1701417	0.04041052	-0.029714584	-0.17821264
"32738_at"	-0.037102222	0.120195866	-0.09721565	0.009048939	-0.11400366	0.035716057	0.011182308
"32739_at"	-0.028810501	-0.24752903	0.20792913	0.052340508	-0.18201971	-0.41521454	-0.011601448
"32740_at"	0.0614233	0.19372606	0.054712296	-0.22743702	0.19184732	0.19329548	0.007804394
"32741_at"	0.10542202	-0.2835827	0.0682168	0.2624321	-0.060132504	-0.31798887	-0.14100456
"32742_s_at"	0.19365501	0.0595994	0.0792613	0.12498665	0.032618046	-0.15474415	-0.062476635
"32743_at"	-0.106446266	-0.033715725	0.014756203	0.06716061	-0.09142828	-0.21373892	-0.014756203
"32744_at"	-0.5056143	0.5369406	0.6015177	-0.47776222	0.09731865	0.040055275	-0.1167202
"32745_at"	-0.30436993	-0.30068684	-0.26597023	-0.24083757	0.18642521	0.3417282	0.458107
"32746_at"	0.25551653	0.082023144	0.109582424	0.01619339	-0.007424831	0.18084049	-0.03744459
"32747_at"	0.028100014	-0.98211575	-0.7703557	-0.53822374	0.5352831	0.46845627	0.8319187
"32748_at"	-0.6133709	-0.14567757	-0.057505608	-0.2864504	0.35638237	0.22869205	0.065029144
"32749_s_at"	0.635478	0.13434601	-0.38864613	0.17192554	0.020587921	-0.10064983	-0.0652132
"32750_r_at"	0.5355606	0.531209	0.5398016	0.03148842	0.17332649	0.4799261	-0.07775211
"32751_at"	-0.028298378	0.26562738	0.18058968	-0.3239689	0.0801301	-0.36312246	0.028298378
"32752_at"	-0.32231617	0.52604294	0.36008358	-0.09933758	-0.2922306	0.24833298	0.012051582
"32753_at"	0.06167364	0.15961504	0.35011053	-0.083496094	0.015291691	0.32339478	-0.105626106
"32754_at"	-0.08537054	0.13991833	0.034951687	-0.03886938	0.036757946	-0.14815092	-0.09422064
"32755_at"	0.032649994	1.3640966	-1.2222133	-0.07407093	0.85633135	-0.42706394	-0.032649517
"32756_at"	0.37709904	-0.06101513	-0.040862083	-0.25508547	-0.010786057	-0.04016018	0.07153797
"32757_at"	-0.15896225	-0.10521793	0.16287327	0.034389973	1.20E-04	-0.073462486	-0.14252615
"32758_g_at"	-0.2068448	-0.2015109	0.16646147	0.11313963	0.072107315	-0.02344942	-0.20846128
"32759_at"	0.18423986	0.115652084	0.33074617	0.02598238	0.16501284	0.17963123	-0.02598238
"32760_at"	-0.096511364	-0.06097555	-0.112508774	-0.039251804	0.26955938	-0.024546146	0.024546146
"32761_at"	0.06613636	-0.18143845	0.007584572	0.025436401	-0.15184784	-0.48272038	-0.047769547
"32762_i_at"	0.002051354	0.16112995	0.2920704	-0.04221964	-0.36935186	-0.044426918	0.03749132
"32763_r_at"	0.068038225	-4.77E-04	0.0676744	-0.09596515	-0.12864184	0.012281418	0.014671087
"32764_at"	0.069850445	0.17209625	0.026049614	-0.24846649	-0.12148571	-0.06548262	0.07795191
"32765_f_at"	-0.06558275	0.27283525	0.18371964	0.102348804	-0.21816874	0.041970253	-0.05932951
"32766_at"	0.14131927	-0.23335648	-0.06418705	0.03626442	-0.009631157	0.04970455	0.15720272
"32767_at"	-0.17328143	0.20173383	-0.009052992	-0.008962154	0.22731376	-0.096618414	0.052462816
"32768_at"	-0.13351917	-0.025744915	0.119995594	0.40076542	0.24196148	0.296587	-0.009878635
"32769_at"	-0.024970055	-0.9571929	0.31112146	-0.007396221	-0.14848185	-0.32214642	0.25885773
"32770_at"	-0.5123687	-0.6304579	0.13721657	0.16646528	-0.38187551	-0.46426344	0.18167782
"32771_at"	0.288944	0.08846164	0.005401611	-0.034611225	0.011332035	-0.005401611	-0.059301376
"32772_s_at"	-0.23072481	-0.002776146	-0.06824112	0.018558979	-0.018995762	-0.09125996	0.014313221
"32773_at"	-0.10404205	0.05402565	-0.09060812	0.020452023	-0.14567709	-0.1486044	0.45265818
"32774_at"	-0.45725727	-0.45305443	0.019859314	-0.46213913	0.29717827	0.4676485	0.13940525
"32775_r_at"	0.85412693	0.19589901	-0.4141345	-0.45009947	-0.22583866	-0.58843756	0.6084318
"32776_at"	0.21593237	0.098748684	0.33596802	-0.045423985	-0.15190506	-0.12089205	0.12526941
"32777_at"	-0.13319159	-0.65171766	-0.21634245	-0.3653865	-0.26035976	0.14654398	0.7954149
"32778_at"	-0.50188494	-0.99356985	-0.09407759	-0.30246496	0.4571042	0.6404171	0.93890476
"32779_s_at"	-0.26985884	-0.18597317	-0.11605263	0.022049904	-0.030090809	-0.059803486	0.3629818
"32780_at"	-0.45909548	-0.6148839	0.47122717	-0.545609	-0.01177454	0.065454006	0.35618687
"32781_f_at"	-0.6114609	-0.10130739	-0.16589522	-0.54683256	0.04987502	-0.04987502	0.75289154
"32782_r_at"	-0.006059647	-0.027508259	0.053053617	-0.13632536	0.050344944	0.059886932	0.06562996
"32783_at"	0.022628784	0.21999502	0.13774538	-0.03256464	0.1440506	-0.22028637	-0.09054232
"32784_at"	0.007915497	-0.47667074	-0.4383917	0.02165842	0.13231182	0.06967306	0.24106503
"32785_at"	-0.05720949	-0.13164759	0.26438427	0.0288167	0.081926346	-0.10381055	0.10660744
"32786_at"	-0.039479256	0.36093044	-2.2342758	-2.4110618	-0.2974062	0.8750868	0.5100336
"32787_at"	0.16767311	0.10021973	-0.32184744	-0.09067345	-0.005344868	-0.18193054	-0.16420507
"32788_at"	-0.024801254	-0.46396542	-0.11057758	0.082862854	-0.15054989	-0.320817	0.24118328
"32789_at"	-0.21536493	-0.6677718	-0.64820147	-0.08230209	-0.008622646	-0.24303961	0.05678463
"32790_at"	0.03286028	0.015927792	0.038981438	-0.015927792	-0.10405159	-0.541708	-0.038105965
"32791_at"	-0.21145296	0.17439508	-0.22843504	0.02805376	-0.25283575	-0.11913395	-0.005534649
"32792_at"	-0.027576447	-0.035918713	0.049969673	-0.22837973	0.09925699	0.23803902	0.059018135
"32793_at"	0.6263046	0.39270592	0.6787987	0.19490623	0.17374992	0.42710686	-0.22184277
"32794_g_at"	0.28936386	0.21571398	0.035927296	0.12078714	0.037109375	0.02496767	-0.28138018
"32795_at"	-0.03108263	0.00622797	-0.28415775	-0.016889095	0.17236185	-0.07673073	-0.049768448
"32796_f_at"	0.2497859	-0.051416874	0.3059559	0.13203382	-0.05365324	0.084308624	-0.25115013
"32797_at"	0.14200068	0.15874577	0.14457178	0.10620642	0.004721642	0.17499685	-0.054517746
"32798_at"	0.57406855	0.014370918	0.2806568	0.021813393	0.20546675	0.5231919	-0.118257046
"32799_at"	-0.19777775	0.29687214	0.104112625	-0.076455116	-0.13388443	-0.01774025	-0.14598083
"327_f_at"	-0.39353848	-0.2932577	0.020549774	0.14908409	0.17583466	0.22809124	-0.02192688
"32800_at"	-0.2212801	0.003824234	0.56848145	0.6387396	-0.065937996	-0.3093071	-0.003824234
"32801_at"	0.06487799	-2.35E-04	-0.5565367	-0.05815649	0.002179146	0.00561142	-0.09030056
"32802_at"	-0.8986492	-0.37025452	-0.4307518	0.16863728	-0.3374648	-0.034518242	0.38062668
"32803_at"	-0.27200317	0.089110374	-0.19246578	0.13640308	-0.38426495	-0.6794958	-0.011769295
"32804_at"	-0.07766914	-0.14325047	-0.065018654	0.18234158	0.09456158	0.09356403	-0.048883438
"32805_at"	1.0851727	-0.4337449	-0.65708876	-0.4480362	0.3272257	-0.05773735	0.19061947
"32806_at"	-0.054124832	-0.24099827	-1.0543032	0.64794254	0.3263054	0.17024326	0.00525856
"32807_at"	-0.37180424	-0.27164078	-0.22024775	0.034671307	-0.09940195	-0.4586692	0.03771162
"32808_at"	0.17624855	-0.12762642	-1.0386019	0.24080944	-0.006476402	-0.42934322	0.06548309
"32809_at"	-0.25766706	-0.41558743	0.021493435	0.49203253	-0.031938076	0.1473403	0.070485115
"32810_at"	-0.11772442	-0.041012764	-0.15394211	0.012247086	-0.012247086	-0.03852749	0.14396
"32811_at"	0.24403381	-0.13144302	-0.1668129	0.044029236	0.20144367	-0.3376522	-0.08664894
"32812_at"	-0.024028778	-0.35175896	-0.27539515	-0.17241669	0.004166126	0.012115479	-0.004166126
"32813_s_at"	0.21140862	0.08108854	0.008669853	-0.008669853	-0.1422615	0.1368165	-0.22284222
"32814_at"	1.439045	1.1871276	-0.20577002	-0.58656883	-0.16173363	0.59656525	-0.042683125
"32815_at"	-1.2801747	0.11232376	-0.76846313	-0.2232399	0.9064021	0.08954096	-0.2487607
"32816_at"	-0.103862286	1.0171146	0.34064388	0.11378765	0.15774298	0.105362415	-0.12152529
"32817_at"	0.17035246	0.10070801	0.25490522	0.06286526	0.088060856	0.011221886	-0.18059921
"32818_at"	-0.61201	0.21045923	-0.84921193	-0.57599926	0.5833845	0.8175931	0.14209032
"32819_at"	-0.31578684	-0.3249879	0.4298663	0.20421505	0.21584225	-0.12220669	0.049724102
"32820_at"	-0.10092497	-0.1632657	-0.07798052	0.05697775	-0.11455774	-0.009726048	0.03512764
"32821_at"	0.020384312	0.11437225	-0.004348278	-0.036434174	0.7159176	0.9194007	-0.032447338
"32822_at"	-0.27727127	0.08390522	-0.25136042	-0.14879274	-0.2022047	0.13890362	0.49065495
"32823_at"	0.013665199	0.006366253	-0.11424923	0.07726526	0.21378708	0.2706566	-0.006365776
"32824_at"	0.38450336	0.05500555	-0.864007	0.06562185	-0.29485178	-0.4541216	-0.05500555
"32825_at"	-0.4219675	-0.38704777	-0.028449059	-0.2769251	0.05346012	0.028449059	0.46335125
"32826_at"	0.017997742	0.054885387	7.77E-04	-0.025597095	-7.77E-04	0.003128529	-0.10280657
"32827_at"	0.2471385	-0.83820915	-0.9656682	-1.0262842	0.5237498	-0.11203003	0.6794152
"32828_at"	0.16189957	0.12268734	0.21089983	-0.014353752	0.14282036	0.26823235	-0.06456947
"32829_at"	0.055533886	0.16120625	0.010544777	-0.22398901	-0.10241556	-0.20558786	-0.010544777
"32830_g_at"	-0.0576272	0.16507864	-0.25050783	-0.36187315	0.034132957	-0.08123779	0.009174347
"32831_at"	-0.010213852	0.07620239	-0.035447598	-0.37672138	-0.10621071	0.03089714	0.14318466
"32832_at"	0.60312843	-0.39635563	-0.07506561	0.14011383	-0.007556915	-0.06310177	0.1521225
"32833_at"	-0.23262358	-0.3193388	-0.9177313	0.052021503	0.60471773	0.42061615	0.49814367
"32834_r_at"	-0.001063347	-0.16584682	-0.046948433	0.124774456	0.042821407	-0.19184613	0.0511539
"32835_at"	-0.38353062	-1.0303535	-0.38353634	0.32056284	-0.046104908	-0.48066998	0.572433
"32836_at"	0.25016403	0.042490005	0.56856346	0.061437607	-0.5634823	-0.30479622	-0.36616993
"32837_at"	0.21246147	0.1054945	-0.1514988	-0.05374813	0.10999584	0.26101017	-0.10199547
"32838_at"	-0.021213055	-0.1726389	-0.2613392	0.021213055	-0.21413517	-0.36112738	0.0328393
"32839_at"	-0.1202178	0.019101143	0.12553215	0.002914429	0.3561306	0.17942762	-0.14552784
"32840_at"	0.44878912	0.02335596	0.5767865	-0.03613472	-0.017688751	0.37536287	0.057443142
"32841_at"	-0.11992931	-1.003871	-0.6536293	0.1664133	-0.03976679	0.19103527	0.72206974
"32842_at"	-0.21344757	0.03215933	-0.025416374	0.28279448	-0.23259306	0.016557217	0.02774334
"32843_s_at"	-0.6912074	-0.037929535	0.3432703	-0.40301037	-0.019239426	0.019239426	0.17231274
"32844_at"	0.44598007	0.101878166	0.33476543	0.08968449	-0.031097412	-0.13848877	-0.10192776
"32845_at"	0.4936676	0.46323872	0.050199986	0.35065985	-0.050199986	-0.48666668	-0.15768814
"32846_s_at"	0.007019043	-0.45911217	-0.6195569	0.15112019	-0.21746063	-0.007019043	0.079216
"32847_at"	-0.12622929	0.4223342	0.25317717	0.50685596	0.19083977	-0.2640252	-0.14059925
"32848_at"	-0.098751545	0.95969677	0.27816105	-0.22534037	0.009845257	0.00548029	-0.00548029
"32849_at"	-0.7725229	-0.301414	-0.8317251	0.053168297	-0.43892574	-0.4087987	0.38747072
"32850_at"	-0.24992895	-0.51545095	0.045356274	-0.29399395	-0.045356274	-0.46609402	0.4564066
"32851_at"	0.00626564	-0.016179562	0.005320549	-0.06873274	-0.005320549	-0.10517025	0.053611755
"32852_at"	-0.1531725	-0.018445969	-0.020750046	0.001274109	0.110406876	0.034374237	-0.001185417
"32853_at"	-0.13478088	-0.36835098	-0.25605488	-0.018387794	-0.298882	0.10226679	0.35332394
"32854_at"	-0.028847218	-0.52000046	-0.4487238	-0.39016628	-0.09106064	-0.21633244	0.51686335
"32855_at"	-0.028642654	0.360672	0.21385384	-0.3752613	0.18592072	-0.1737256	0.5098944
"32856_at"	0.059210777	-0.05120325	0.077123165	0.07169485	-0.17042017	0.015753746	-0.26070642
"32857_at"	-0.5302825	0.21593285	-0.38299417	0.52422667	-0.27741098	-0.19730854	0.026526928
"32858_at"	0.09145355	0.35706902	0.13077974	0.054243088	0.005599499	-0.059767246	-0.08846235
"32859_at"	0.99627066	0.031157017	-0.031157017	-0.68346167	0.078289986	-0.08195686	0.09397411
"32860_g_at"	1.7673206	0.7929287	-0.06862545	-1.0608053	-0.16787529	-0.52475405	0.25622463
"32861_s_at"	0.16355848	0.12549305	0.33093095	-0.08298516	0.170789	0.2567594	-0.037424564
"32862_at"	0.22835016	0.22458315	0.12715864	0.067168236	-0.10703802	-0.17501926	-0.25878763
"32863_at"	0.24199057	0.33223534	-0.024300098	0.029688358	0.001255512	-0.22089481	-0.19505739
"32864_at"	0.10838032	0.12062502	0.06028557	-0.0419693	0.03891611	0.34435177	-0.14241743
"32865_at"	-0.08649516	0.06919718	-0.31892657	0.054232597	0.10101795	-0.057969093	0.02801609
"32866_at"	0.12503433	0.011463165	-0.047488213	0.36588	-0.18120575	-0.1719904	-4.23E-04
"32867_at"	-0.086185455	0.027101517	0.045648575	-0.050819874	-0.09183359	0.03523588	0.07120943
"32868_at"	-0.11930704	0.34405613	0.07622862	0.09696674	-0.16534662	0.025970459	-0.13474083
"32869_at"	0.2844205	0.11659241	0.012631893	0.06631994	-0.16987133	0.015837193	-0.6195674
"32870_g_at"	0.11002302	0.1329956	-0.020770073	0.17686605	-0.04295683	0.24992657	-0.055425167
"32871_at"	-0.250391	-0.45274687	-0.56439066	-0.21935987	-0.046099663	-0.05427265	0.31441307
"32872_at"	-0.41797495	0.09311962	0.003035545	-0.01196909	-0.22056437	-0.18152714	0.33187056
"32873_at"	-0.11611605	-0.025800705	0.34724808	0.9672661	-0.3345995	-0.090765476	-0.06921387
"32874_at"	0.3165059	0.38023424	0.26025152	0.010837555	0.3292389	0.14336872	-0.26769257
"32875_at"	-0.14632654	0.15184164	0.018736362	0.07503033	0.1454215	-0.10069084	-0.18168402
"32876_s_at"	0.21534729	0.1088047	0.34419823	0.001416206	0.08946562	0.39689016	-0.036070347
"32877_i_at"	-0.01346302	-0.11475849	-0.023263931	0.1698389	0.011570931	-0.003340721	0.11682415
"32878_f_at"	-0.12540817	-0.46306705	-0.054608345	0.22052479	0.112467766	0.16952038	0.11116028
"32879_at"	-0.053131104	-0.08864784	-0.12241602	0.050514698	-0.086845875	0.020659924	-0.038631916
"32880_at"	-0.15689611	-0.14250326	-0.12644863	0.110640526	0.052958965	0.011309147	-0.0349679
"32881_at"	0.25656605	0.11973953	-0.00429821	0.07845211	0.0663805	-0.043510437	-0.10527229
"32882_at"	0.19557524	0.17179823	0.36596107	-0.007342339	0.028286457	0.39973354	-0.09819555
"32883_at"	0.03377819	-0.3050213	0.12190676	0.09307861	-0.21378231	-0.42464542	-0.036953926
"32884_at"	0.23815346	0.081710815	0.3013482	0.19711018	-0.048333168	0.048333168	-0.104870796
"32885_f_at"	0.21738386	-0.14228916	0.16443062	0.07399464	0.08210516	-0.06943321	-0.35864353
"32886_at"	0.046833992	-0.030005455	-0.017564297	0.1449213	-0.16949224	-0.23004627	-0.23594952
"32887_at"	0.14782429	0.041672707	0.07652712	0.16458225	0.10214949	0.12809134	-0.10682821
"32888_at"	0.20262527	0.27001476	0.20841694	-0.02674532	0.030284405	0.00549078	-0.1426444
"32889_at"	0.099995136	9.95E-04	-0.13102388	0.06397724	-0.04213953	0.6714773	-9.95E-04
"32890_at"	0.07409048	0.03214407	0.018313885	0.32149696	0.20186567	0.018122196	-0.057080507
"32891_at"	0.26886082	0.23433018	0.22693396	0.08121157	-0.23236561	0.16137648	-0.18160725
"32892_at"	0.2920909	-0.10080004	1.0808401	0.5425792	-0.03055954	-0.23355341	-0.047910213
"32893_s_at"	0.031131744	0.9512272	-0.016613007	0.030817032	-0.36868668	-0.21515608	-0.15202045
"32894_at"	0.22894144	0.21583605	0.2785635	0.010777473	0.00973177	0.24551821	-0.13932323
"32895_f_at"	0.08084965	0.4622097	0.23510933	-0.11291027	0.1683979	0.47944164	-0.12771034
"32896_at"	0.12384224	0.18148041	-0.009147406	0.13307905	0.20220041	0.0702858	-0.11254859
"32897_at"	0.057561874	0.09410858	0.05628109	-0.047855377	-0.10376644	-0.05591011	-0.017138481
"32898_at"	0.25146055	0.17960835	0.36994457	0.07550812	2.73E-04	0.0424881	-0.19231081
"32899_s_at"	-0.008562088	0.120317936	-0.032177925	-0.099701405	-0.10417509	0.0158844	0.20135164
"328_at"	0.16181374	-0.003535748	0.20566702	0.033503532	0.10468149	0.18181038	-0.102983475
"32900_at"	0.27365494	0.04862213	0.19296932	0.13278961	-0.001571655	-0.035508156	-0.1771326
"32901_s_at"	-0.06383753	-0.41297626	0.3212576	0.2558818	-0.043059826	-0.9248004	0.04305935
"32902_at"	0.001200676	0.14504957	-0.085746765	-0.001201153	0.088531494	0.112617016	-0.115585804
"32903_at"	-0.004600763	0.1369462	0.1371007	0.1019783	-0.13063884	-0.06428909	-0.12165117
"32904_at"	0.05906582	0.056056023	0.059628487	0.09541035	-0.119151115	-0.07879734	-0.104486465
"32905_s_at"	0.42743778	-0.12298393	0.12102699	0.46959448	-0.37496138	-0.29771805	-0.28591156
"32906_at"	0.17417431	0.24232864	0.26893616	-0.026301384	0.026301384	0.6776953	0.036908627
"32907_at"	0.28550148	0.4482975	0.4863701	0.07204437	0.11267376	0.42234898	-0.1025753
"32908_at"	0.39340973	0.17251635	0.3068962	0.022752285	-0.06345844	0.17064285	-0.06393671
"32909_at"	0.05491495	0.018349648	0.008865356	0.11744356	-0.046762943	-0.039608955	-0.25098515
"32910_at"	0.28787518	0.42113256	0.24238396	0.12826109	-0.063732624	0.20641232	7.98E-04
"32911_s_at"	0.06726551	-0.029614687	0.10199928	0.1744411	0.04552412	0.008323908	-0.017140865
"32912_at"	0.37332487	0.13278961	0.1691413	0.067708015	-0.24230623	0.10866499	-0.36340237
"32913_i_at"	0.48732853	0.22210884	0.45632648	-0.014949322	-0.23541212	0.02549553	-0.31411457
"32914_f_at"	-0.0704236	0.17081308	0.014802456	-0.011166096	-0.2705164	-0.1891036	-0.21659088
"32915_at"	-0.06545639	0.15529537	-0.11622906	0.003935814	-0.048254967	-0.17327023	-0.009932518
"32916_at"	0.12791872	0.1436863	0.22129631	-0.10271931	-0.34029198	-0.22366238	-0.03793907
"32917_at"	0.06902027	0.056515694	0.057556152	-0.060355186	-0.15030575	0.27068424	-0.11966324
"32918_at"	0.07965183	0.21694565	-0.11333847	0.1276617	-0.05254841	-0.057886124	-0.12592077
"32919_at"	0.33400583	0.44737768	0.4483614	0.05106163	-0.08096361	-0.051062107	-0.1281929
"32920_at"	0.10068226	0.028188705	0.090443134	-0.19656086	-0.026810646	0.008338928	0.07185078
"32921_at"	-0.7014775	0.043183804	-0.052153587	0.07538462	0.008433819	0.1100378	-0.10681248
"32922_at"	0.27869797	0.16502047	0.025506973	0.090321064	0.023052692	0.06556845	-0.08039665
"32923_r_at"	0.106884	0.20545006	0.024484634	-0.023548126	-0.20807552	0.12815571	-0.14036274
"32924_at"	0.11862612	0.20885038	0.19820738	0.006776333	0.061924934	0.18792486	-0.082466125
"32925_at"	0.30236912	0.26631594	0.22199965	-0.015754223	0.035683155	0.104842186	-0.105127335
"32926_at"	-0.101546764	-0.051143408	-0.12528133	0.07957411	0.051143646	-0.15809894	0.48177338
"32927_at"	0.15060282	-0.016977787	0.16306877	0.016977787	0.052998543	0.18612003	-0.03438902
"32928_at"	0.2144351	0.08987951	0.13506842	0.020552158	-0.118015766	0.120251656	-0.04867506
"32929_at"	0.21150303	0.2129507	0.43377447	0.2555952	0.15600348	0.21829462	-0.1082778
"32930_f_at"	-0.37363625	0.17812061	-0.018669128	0.688005	-0.24769783	-0.18290234	-0.0853138
"32931_at"	0.0172863	0.42957735	-0.03263855	0.1782074	0.30333614	0.25028324	1.86E-05
"32932_at"	-0.17313099	-0.10704088	1.3929577	-0.6556759	0.01449728	-0.01449728	0.16635466
"32933_r_at"	0.2494793	0.197299	0.08796692	-0.012196541	0.15426159	-0.056728363	-0.08800697
"32934_i_at"	-0.11735439	0.023094177	0.16552877	0.43958712	0.18748951	0.24093819	-0.21461105
"32935_at"	0.28094745	0.11594677	0.04535818	0.084665775	0.10393119	0.19037461	-0.19046974
"32936_at"	-0.008137703	-0.036845684	-0.095948935	0.21415424	0.008137703	-0.0499115	-0.07671094
"32937_at"	0.00381422	-0.07417536	-0.23196936	-0.00381422	0.051831722	-0.025615692	0.04829645
"32938_at"	0.07816839	0.26904535	-0.003270626	0.18334484	0.41758537	0.19941473	-0.18260574
"32939_g_at"	0.29957533	0.053234577	0.49783516	0.010065556	0.27951193	0.3835988	-0.18539858
"32940_at"	0.29195452	0.049666405	0.20478821	0.19452572	-0.003944874	-0.026746273	-0.23014784
"32941_at"	0.15362549	0.021586895	0.0996027	0.18320274	0.026795864	-0.10624409	-0.021586895
"32942_at"	0.10760498	-0.033076763	0.03316784	0.18420172	0.15632105	-0.031960487	-0.28029156
"32943_at"	0.30391407	0.42294312	0.36612034	3.58E-05	0.08441019	0.20493221	-7.25E-05
"32944_at"	0.20700741	-0.23501992	0.10616779	0.08167696	-0.12658739	-0.15778637	-0.09664512
"32945_i_at"	0.1860969	0.13435793	0.1331377	0.16374063	-0.025185108	0.21950102	-0.1304822
"32946_r_at"	0.23322129	0.005223513	0.20212722	0.24232197	-0.005223751	0.020775318	-0.012034178
"32947_at"	-0.04959631	-0.036362886	-0.11735535	0.008336306	0.07584429	-0.031832457	-0.08224988
"32948_at"	0.115659475	-0.070560694	0.25364494	0.081665754	0.375916	-0.07703614	-0.04159999
"32949_at"	0.3145771	0.34714413	0.27579117	0.049333096	0.14446354	0.38106728	-0.08374691
"32950_at"	0.057486296	0.141361	-0.03055811	-0.06089878	-0.13443589	-0.1667502	0.015458584
"32951_g_at"	-0.124949455	0.047883034	-0.10745621	0.025951862	-0.15534782	-0.24318695	-0.2019248
"32952_at"	0.13257217	0.1801486	0.20974112	0.104012966	-0.055047512	-0.024661541	-0.26112986
"32953_at"	-0.012272358	0.025016308	-0.15821648	0.09456301	0.036983967	-0.046446323	-0.09298897
"32954_at"	-0.0831728	-0.41495657	-0.2671919	-0.13252735	-0.010467052	-0.48262548	0.17791605
"32955_at"	-0.1859796	0.040921926	-0.3243718	0.030649424	0.030509233	-0.07727814	-0.030372143
"32956_at"	-0.0511961	-0.00663662	-0.024100304	-0.016386032	0.016237259	-0.05579281	-0.02204132
"32957_g_at"	0.05234289	0.101670265	-0.07736683	-0.023327827	-0.047463894	0.21846724	0.1770401
"32958_at"	0.21962452	0.09857702	0.15131474	0.01823759	-0.007711887	0.4102559	-0.10009718
"32959_at"	0.10480881	-0.14092731	0.050582886	0.35249424	-0.050582886	-0.10901117	-0.30160952
"32960_at"	0.028310776	0.10397339	0.17780781	0.1458149	0.15092659	0.15933132	-0.069107056
"32961_at"	-0.25196362	0.03371668	0.12727594	-0.23306894	0.1327095	-0.04253626	0.16255426
"32962_at"	0.09593248	0.05767107	0.08037138	-0.22520137	0.0980711	0.059704304	-0.05767083
"32963_s_at"	-0.57931614	-0.40645933	-0.37115955	-0.38089657	0.2668686	-0.054024696	0.47030878
"32964_at"	0.13783741	0.051580906	-0.2039895	-0.0847311	-0.06614113	-0.18439579	-0.100634575
"32965_f_at"	0.08751106	0.16362762	0.12408638	0.105831146	0.27540302	-0.112971306	-0.26743174
"32966_at"	0.16613436	0.001226902	0.59091234	0.07663441	0.103419304	0.17753553	-0.0662303
"32967_at"	0.04760456	0.05546713	0.20190334	0.2988925	-0.1733613	-0.26155424	-0.27991724
"32968_s_at"	0.12134123	-0.17889929	0.013153076	0.08558178	-0.001299381	0.33949852	0.001298904
"32969_r_at"	0.4291935	0.59437466	0.693655	-0.31342983	0.008833885	-0.8979435	-0.045297623
"32970_f_at"	0.36301327	-0.037133217	0.47445297	0.055080414	-0.08089924	-0.15031528	-0.020824432
"32971_at"	-0.24057293	0.10038662	0.11391258	-0.10873222	0.04127121	-0.06681633	-9.48E-04
"32972_at"	0.0961411	-0.092229605	0.18110204	0.07969284	0.05186963	0.059818983	-0.11017084
"32973_s_at"	0.14458609	-0.020694733	-0.027104855	0.10177469	-0.038495064	0.01717949	-0.16091299
"32974_at"	-0.031092167	0.17333078	0.20739031	0.19133425	0.047876358	0.010077477	-0.25868845
"32975_g_at"	0.119681835	0.054897785	0.036295414	0.22711706	0.0734067	-0.057198048	-0.30397558
"32976_s_at"	0.1836338	0.09487057	0.06075716	0.052028656	-0.21968317	0.08521128	-0.48378992
"32977_at"	0.020084858	-0.12412548	-0.23017025	-0.19482136	0.00546217	-0.3747344	0.2200942
"32978_g_at"	0.009118557	0.05853796	0.059580326	-0.009118557	0.23105764	0.3344698	-0.2141571
"32979_at"	0.1297369	-0.1631198	0.026339054	0.12473774	0.093792915	0.068455696	-0.15241241
"32980_f_at"	-0.24611855	-0.24829769	0.4940033	0.043929577	0.3148532	0.116921425	-0.1614685
"32981_at"	0.12125206	0.08357763	0.009387016	0.15875673	-0.319407	-0.13213396	-0.15706015
"32982_at"	-0.028760195	0.09585142	0.12274432	-0.03882861	0.025556564	-0.002842665	-0.07003999
"32983_at"	0.19644022	0.119681835	0.29241228	-0.0128479	0.07584667	0.14443016	-0.07668972
"32984_s_at"	0.12118292	0.1169796	-0.1217432	0.08444548	-0.02866888	0.04202938	-0.27135086
"32985_at"	-0.09107876	-0.108587265	0.05455613	-0.19674301	0.37534928	0.09293771	0.39665246
"32986_s_at"	0.29525995	0.3193426	0.14369297	0.055037975	-0.005018234	-0.023247719	-0.0448761
"32987_at"	0.1406231	0.21361876	0.109963894	-0.009259701	-0.049064636	-0.022457123	-0.097696304
"32988_at"	0.047795773	0.11500168	-0.14619923	-0.022746563	0.20387983	0.10744667	-0.28361607
"32989_at"	0.30943346	0.3988824	0.36013556	0.114366055	0.05730915	0.15130186	-0.13380098
"32990_at"	0.15747356	0.06515598	0.14295006	0.051032066	0.28222084	0.19067478	-0.19611168
"32991_f_at"	0.12607813	0.1671195	0.10162258	0.08624983	0.28033352	0.010202408	-0.02003622
"32992_at"	-0.09941912	0.14810944	0.1026485	0.124375105	0.007652044	-0.23717093	-0.137959
"32993_s_at"	0.23250198	-0.066768646	0.16062832	-0.005764961	0.04329872	0.053735733	-0.16164303
"32994_at"	-0.002921581	0.38380337	0.2230649	0.32047844	0.002921581	-0.15498304	-0.23372698
"32995_at"	-0.056961536	-0.006834984	0.0792799	0.37567663	0.009303093	-0.30539036	-0.1531043
"32996_g_at"	-0.048107147	0.13265991	0.377429	0.19677448	0.06760025	-0.004292488	-0.25621128
"32997_at"	0.34618902	0.34471464	0.07329035	0.015676975	0.18958807	0.5199442	-0.15877199
"32998_at"	0.12046766	0.25581026	-0.16299438	0.033484936	0.059840202	0.10491705	-0.06108904
"32999_at"	0.09508133	0.1633172	0.40948248	0.025176525	-0.23080635	-0.020133018	-0.1055603
"329_s_at"	0.09579277	0.08345604	-0.06948185	0.3532734	-0.1738863	-0.02687931	-0.046815872
"33000_at"	-0.11874771	-0.2608528	0.23602486	-0.14725113	0.002233505	0.26121712	-0.016839027
"33001_s_at"	0.11035776	0.17661715	-0.0863266	0.02302885	0.1166358	0.07431412	-0.21574783
"33002_at"	0.107803345	0.17408848	0.16337156	-0.05701828	-0.070874214	0.35268974	0.016684532
"33003_at"	0.20891714	0.017325401	0.16237354	0.2853999	0.13006687	0.2559991	-0.017325401
"33004_g_at"	0.23225689	0.2097292	0.21989298	0.0885787	-0.073583126	0.08607769	0.011895657
"33005_at"	-0.1417532	0.17013407	-0.2659285	-0.23385096	-0.008707523	-0.055552483	0.044131756
"33006_at"	0.20727491	-0.04305458	0.6799731	1.0974402	-0.057622433	-0.024830818	-0.027790546
"33007_at"	0.18564653	0.021155834	-0.018127918	-0.011069775	0.023716927	0.024149418	-0.14608908
"33008_at"	0.19010448	0.019524574	0.055730343	0.16524744	-0.025410652	-0.007851601	-0.012639999
"33009_at"	0.3716302	0.0581522	0.15340328	0.03538561	0.07112503	0.18626451	-0.17551899
"33010_at"	0.036195755	0.045203686	0.19448185	0.16504812	-0.001686573	-0.0734601	-0.003817082
"33011_at"	0.21405077	0.2796936	-0.05343342	-0.03135872	-0.106099606	-0.045715332	-0.15819597
"33012_at"	0.32549715	0.19702387	0.2342081	0.025121212	-0.025121212	0.20969296	-0.18681431
"33013_at"	0.053565502	0.15724325	0.010505676	0.02510786	0.27797318	0.24434519	-0.30644655
"33014_at"	0.24432325	0.33581018	0.11126089	0.06143856	0.046982765	0.061570168	-0.050558567
"33015_at"	0.17644596	0.11764383	-0.07751322	0.05183935	0.030937672	0.16665173	-0.11758995
"33016_at"	-0.007853508	0.08238888	-0.08199692	0.07539177	-0.065668106	0.079172134	-0.09523487
"33017_at"	0.023532867	-0.14477777	-0.00516367	-0.2514162	0.051258087	0.004028797	0.11705971
"33018_at"	0.36629534	0.3273487	0.18178177	-0.028811932	0.12615061	0.37565708	-0.25748587
"33019_at"	0.102128506	0.09641886	0.22018433	0.21258354	-0.16135788	0.026135921	-0.18885374
"33020_at"	0.28629017	0.12755156	0.1627922	0.1533823	-0.052525997	0.017392159	-0.22330141
"33021_at"	0.1699791	-0.023897648	0.08351374	0.023897648	0.33240175	0.30814314	-0.040391445
"33022_at"	0.20639896	-0.036403656	0.2806139	0.09173918	0.2231288	0.20975304	-0.14528084
"33023_at"	-0.05667019	0.17145729	0.19880486	0.07367134	0.18699408	0.18982172	-0.13344193
"33024_at"	0.16163588	0.22142744	0.33210325	0.058672905	0.01364851	0.15090895	-0.11463022
"33025_at"	0.18344069	0.26062584	0.17780066	-0.029179573	0.05951166	0.23241138	-0.17155838
"33026_at"	0.16964817	0.14622211	0.09553528	-0.006484509	0.006484509	0.1410718	-0.23458672
"33027_at"	0.131773	0.20509148	0.014451981	-0.019586563	0.06863022	-0.11753702	-0.09764242
"33028_at"	0.044849873	0.18998384	-0.09940815	-0.02455616	0.005827427	0.21105433	-0.11147547
"33029_at"	0.13705015	0.23330116	-0.041668892	0.13395023	0.14570951	0.2520914	-0.18726397
"33030_at"	0.07261038	0.108131886	0.030835152	0.08102989	-0.013437271	-0.13598251	-0.0896554
"33031_at"	0.019612312	-0.08380461	0.1335249	-0.026115894	0.17653465	-0.10896587	0.047959328
"33032_r_at"	0.09142184	0.01569748	-0.03302288	0.002453327	-0.050467968	-0.14232421	-0.060845137
"33033_at"	0.17431831	0.09364414	0.015594959	0.07431221	0.07059908	0.039335728	-0.17531872
"33034_at"	0.13454437	0.14308357	0.002656937	0.032107353	-0.094818115	0.07522297	-0.15348911
"33035_at"	-0.18095255	-0.09221029	-0.26953268	-0.08618355	-0.17261934	-0.19698286	0.8341255
"33036_at"	-5.26E-04	0.006346226	0.07199931	5.26E-04	0.113818884	0.30604887	-0.13421774
"33037_at"	0.18514967	0.1320467	0.13560629	0.10802126	0.060975075	0.31518364	-0.21767855
"33038_at"	0.26612377	0.121694565	0.035354614	-3.22E-04	0.21760178	0.057029247	-0.1428957
"33039_at"	0.18285227	0.042395353	0.39862156	0.00606513	-0.15596366	-0.08312321	-0.10057497
"33040_at"	0.010416985	0.025258064	-0.06556654	0.07974148	0.13845682	-0.1378274	-0.18911362
"33041_at"	0.11652517	0.12978077	0.032573223	0.14748096	-0.23689365	-0.032573223	-0.090791225
"33042_r_at"	0.2497592	0.001987934	0.040783882	-0.0761075	0.19210768	0.271235	-0.001344204
"33043_at"	0.106853485	0.07567263	-0.077111244	0.015023708	0.059773445	-0.040010452	-0.14967966
"33044_f_at"	0.20018578	0.15094328	-0.071383	-0.030315876	0.02311945	-0.33967924	-0.28986025
"33045_r_at"	0.4431138	0.16011667	0.4918723	-0.01657486	0.044228554	0.2664857	-0.10007048
"33046_f_at"	0.1409316	0.13107634	0.1299715	0.027853966	0.44211912	0.58298635	-0.16523027
"33047_at"	-0.07290697	0.001542091	0.11565113	-0.22408581	0.024261475	-0.12368798	-0.001542091
"33048_at"	0.015346527	-0.014961243	0.13383913	0.05483961	-0.015156269	-0.008998394	-0.1290493
"33049_at"	0.19763613	0.22351742	0.39315414	0.08334446	-0.16651297	0.3053255	-0.13499975
"33050_at"	9.06E-06	0.14113855	0.109350204	0.28131914	-0.04950857	-0.032991886	-0.1372757
"33051_at"	0.21859574	0.020952463	0.255167	-0.020952463	0.14918423	0.05750513	-0.22447109
"33052_at"	0.07201958	0.044777393	0.018139362	0.1718812	-0.25400877	-0.43263483	-0.27729368
"33053_at"	0.013335705	0.11836624	0.39115238	0.07387829	0.1679802	-0.007049084	-0.16292953
"33054_at"	0.29369068	0.16081	0.18145895	0.14490509	-0.022354603	0.02235508	-0.15447807
"33055_at"	0.042820454	-0.16135931	0.07604408	-0.009582996	0.06744623	-0.12607384	-0.018147945
"33056_at"	0.19390345	0.3169613	0.23942232	0.0245471	0.06756306	-0.11953497	-0.17114067
"33057_g_at"	0.14998055	0.06835413	0.2829113	-0.1265297	-0.38631105	0.13485527	-0.03057909
"33058_at"	-0.045470238	0.025119781	-0.051567078	-0.14679909	-0.05025482	0.007126808	-0.00302887
"33059_at"	0.21916533	0.108341694	0.2044549	-0.09206486	0.034854174	0.27264595	-0.08333731
"33060_g_at"	0.10105705	0.07265711	0.25450134	0.13516283	-0.031958103	-0.036599636	-0.03568411
"33061_at"	-0.016218185	0.20615578	-0.017310143	0.05326748	0.0473876	0.062755585	-0.079741955
"33062_at"	0.33429623	0.327631	0.3799901	-0.13937569	0.16895342	0.22326088	-0.04854822
"33063_at"	0.001121044	0.37737703	0.016036034	-0.001121044	0.04101181	-0.06313944	-0.051759243
"33064_at"	-0.042671204	0.11403561	-0.029444695	0.018060684	0.14174938	-0.03473568	-0.08021164
"33065_at"	-0.01732254	0.09816885	0.16028261	0.069588184	0.13900661	0.04088354	-0.31451178
"33066_at"	-0.011354446	-0.024233818	0.15123844	0.11508846	0.03581047	-0.08556843	-0.1141634
"33067_at"	0.3712921	0.024435043	0.246593	0.056288242	0.2999897	0.6120558	-0.12501049
"33068_f_at"	0.014201641	-0.08055949	-0.14560866	-0.0398314	0.1517067	0.045804977	-0.023914814
"33069_f_at"	0.18355227	0.08310652	1.51E-04	-0.077756405	-0.03732729	-0.3053794	0.020838737
"33070_at"	0.085954666	0.20341635	0.10105944	0.06207037	-0.07356596	0.33960485	-0.2617674
"33071_at"	0.07445526	-0.042670727	-0.05408621	0.162251	0.081659794	0.1256957	-0.2689476
"33072_at"	-8.39E-04	0.44702148	0.3254385	-0.045161247	0.1538434	0.23426294	8.39E-04
"33073_at"	-0.1753087	-0.23915148	0.05111313	-0.036258698	-0.2763815	-0.41813898	0.036258698
"33074_g_at"	-0.13142586	-0.011864185	0.66844416	0.18193626	-0.50640726	-0.13144445	0.0697732
"33075_at"	-0.32107306	-0.048634052	0.3309765	0.10572386	-0.18412256	-0.065042496	0.3346033
"33076_at"	0.08491731	0.15111494	0.1654222	-0.0969336	0.092164755	0.08663559	-0.096735716
"33077_at"	0.2592802	0.35382795	0.29721212	0.006700516	-0.017874718	-0.061203957	0.02259779
"33078_at"	0.1608119	0.33408165	0.26973057	0.07997227	0.14054346	0.19261217	-0.13291407
"33079_at"	0.35996866	0.27965736	-0.068473816	0.001997948	-0.001997948	0.42733574	-0.14699936
"33080_s_at"	0.39801311	-8.79E-04	0.20569515	0.1059885	-0.25297832	8.79E-04	-0.08913422
"33081_at"	0.526021	0.29979324	0.56886387	0.05346918	0.1497941	0.35387182	-0.12787533
"33082_at"	0.024558067	-0.18199015	-0.106734276	-0.05090666	0.17703581	-0.012465	-0.13227034
"33083_at"	0.34946537	0.3622918	0.44361734	-0.00948143	0.18919373	0.21457529	-0.06028843
"33084_at"	0.24179459	0.3233223	0.27424765	0.24175358	-0.18825722	0.052502155	-0.19853067
"33085_at"	0.3493824	0.1280961	0.22140169	0.027851582	0.020154953	-0.041420937	-0.059117794
"33086_at"	0.17700529	0.29180622	0.43185997	0.016371727	0.06889868	0.08308172	-0.15060139
"33087_s_at"	0.27329302	0.001066685	0.3173089	0.04859352	0.040777206	-0.041629314	-0.12135172
"33088_at"	0.2219882	-0.09158325	0.18806648	0.16002178	0.33336306	0.07933235	-0.3733549
"33089_s_at"	0.0303092	0.014933586	-0.07960558	0.050958157	-0.25811052	0.15118694	-0.25511312
"33090_at"	0.2457571	0.19619656	0.006164551	0.12748623	-0.003882408	0.045636177	-0.21234798
"33091_at"	0.14935398	0.15401411	0.3472786	0.02020216	-0.051126003	0.27457285	-0.12992764
"33092_at"	0.022854805	-0.12647009	0.023627758	-0.07834005	-0.1563735	-0.35600328	-0.07154226
"33093_at"	-0.010395527	0.03024435	-0.029736996	0.03014183	-0.16883993	-0.15881205	-0.120810986
"33094_s_at"	0.003252506	0.016040802	-0.003252506	-0.024056911	0.07998848	-0.12711525	-0.019970417
"33095_i_at"	0.32804346	0.22197437	0.5266075	4.32E-04	0.05210972	0.58956194	-0.23727655
"33096_r_at"	0.15223932	0.076886654	0.20413876	0.16450405	-0.025725842	0.02444315	-0.11645126
"33097_at"	0.4966278	0.27192593	0.18652916	-0.08403063	-0.13962555	0.104361534	-0.09847164
"33098_at"	0.2605157	0.23534727	-0.023813248	-0.062062263	0.13265133	0.24349737	-0.1182971
"33099_at"	0.018799782	0.004659176	0.21550608	-0.042514324	0.014310837	0.16028929	0.001550674
"330_s_at"	0.80073833	-0.013473511	0.0695982	0.075406075	0.013473511	-0.06677914	0.18680668
"33100_at"	0.08440447	0.29966402	0.22788906	0.055366993	-0.041454315	-0.09946489	0.001594544
"33101_g_at"	0.25493383	0.2441907	-0.09908199	-0.006458759	-0.042568684	0.15125847	-0.07028341
"33102_at"	-0.027221203	-0.7939749	-0.89254856	-1.212997	0.32215023	0.32016182	0.8442049
"33103_s_at"	-0.006363869	-0.17520618	-0.117501736	-0.48376656	0.09064388	0.09517813	0.40413237
"33104_at"	0.41799068	0.18412447	0.37860632	0.05246687	0.17958117	0.5159793	-0.01776743
"33105_at"	0.10629606	0.04346943	0.002233505	0.083860874	-0.08526373	0.053921223	-0.08434391
"33106_at"	0.11610699	0.31966496	0.36778212	0.062088966	-0.188447	0.19251776	-0.2359457
"33107_at"	0.0349617	-0.32688093	-0.52419853	-0.052488327	-0.059123993	0.1739788	0.11769199
"33108_i_at"	-0.036912918	-0.006343365	-0.10601044	-0.45112848	0.28550196	0.4512062	0.26894855
"33109_f_at"	0.12991619	0.024397373	-0.12342358	-0.1926117	0.41219282	0.30471563	0.009922028
"33110_at"	0.039719105	0.1992755	0.17475653	0.097741604	-0.02976942	-0.1452465	-0.14452171
"33111_at"	-0.025320053	0.045135498	-0.28426266	-0.08015776	-0.02182579	-0.1411004	-0.09327936
"33112_at"	0.046673775	0.24282026	-0.005815983	-0.029604912	-0.014271736	-0.17394328	-0.041974068
"33113_at"	0.41196108	-0.398633	-0.6729865	-0.36991644	0.081284046	0.59872913	0.47509336
"33114_f_at"	0.37482953	0.463794	0.48518443	-0.009111881	0.22474527	0.370672	-0.05023074
"33115_at"	0.10803223	0.30416536	0.11955595	-0.105606556	0.046577454	-0.09148121	-0.041381836
"33116_f_at"	-0.04112625	-0.30830574	0.6340599	-0.055942535	0.28819656	0.21669102	0.04112625
"33117_r_at"	-0.24167824	-0.49209213	1.040945	-0.050361633	0.47263813	0.48495483	-0.002186775
"33118_at"	0.033949852	0.43010092	0.1360383	0.05121994	0.40168715	0.24131298	-0.11205101
"33119_at"	-0.24356937	0.2609234	-0.04546404	-0.17690992	0.15856743	-0.002429962	0.20676279
"33120_at"	-0.07544184	-0.012674809	0.01521349	-0.007674217	0.030256271	-0.020149231	-0.15341854
"33121_g_at"	0.006197929	-0.28630543	0.14594889	-0.05827284	-0.05851412	0.0657177	0.16287851
"33122_at"	-0.22637463	-0.10834694	0.01471138	0.024495125	-0.110180855	-0.3584566	-0.01471138
"33123_at"	0.00584507	0.10586405	-0.12908077	-0.22329617	0.24639845	0.005822659	-0.05068302
"33124_at"	-0.03113985	-0.02868843	0.48738098	0.48852253	0.26515627	-0.02342987	-0.022245407
"33125_at"	-0.28432417	0.036170483	-0.48384666	0.09445572	-0.22697783	-0.15597916	0.15663815
"33126_at"	-0.97093296	-0.4807477	-0.029379845	0.18150997	-0.07159233	-0.04920435	0.04102087
"33127_at"	0.36440802	0.21397686	-0.18630362	0.062356472	-0.022491932	0.022491932	-0.17952394
"33128_s_at"	-0.089132786	0.015767574	0.29029942	0.012793064	0.119923115	0.4125371	0.005930901
"33129_at"	-0.03331089	0.18743229	0.1151247	0.034639835	-0.003296852	-0.2037735	-0.041629314
"33130_at"	0.069123745	0.1107254	0.105476856	-0.017767906	-0.085393906	-0.07404661	-0.015960217
"33131_at"	0.39617968	0.17134047	0.13707733	0.19235134	0.004389286	0.18134165	-0.36246204
"33132_at"	-0.14934635	0.8341913	0.14931965	0.31144238	-0.092698574	-0.11408234	-0.10492897
"33133_at"	0.11762476	0.09634781	0.03392601	0.012258053	0.03744316	-0.1382885	-0.06730366
"33134_at"	0.2517519	-0.0714674	-0.088110924	0.03861046	-0.029953003	0.029773712	-0.003732681
"33135_at"	0.36117125	0.26203156	-0.08322334	0.051166534	0.019492626	0.4166193	-0.041028023
"33136_at"	0.17944336	-0.5751505	0.08705473	0.498425	-0.10405111	0.074597836	-0.19368696
"33137_at"	0.3147459	0.17344093	-0.13880634	-0.03168392	0.10166836	0.014539719	-0.014539719
"33138_at"	0.27212048	0.002857208	0.17090082	-0.116493225	0.049434185	-0.020920277	-0.046489716
"33139_s_at"	-0.13887024	-0.43838215	-0.33897495	-0.563148	0.5740671	0.53362894	0.5824919
"33140_at"	0.7252941	0.002952576	-0.27268457	-0.2087655	0.008062363	0.35337257	-0.012518883
"33141_at"	0.26490974	0.041953087	0.023165703	0.040611267	-0.075574875	-0.05288124	-0.11840439
"33142_at"	0.029510975	0.13467503	0.035758495	0.06303263	-0.05418873	0.25360346	-0.06966257
"33143_s_at"	0.2395258	0.123003006	-0.007022381	-0.05915308	0.8667469	0.28788805	0.3870721
"33144_at"	0.080519676	0.13094044	0.094385624	-0.13451004	0.35554695	0.06684923	-0.0534997
"33145_at"	0.001325131	0.16302395	0.3907199	-0.04886484	0.06900358	-0.044156075	-0.043602467
"33146_at"	0.6955576	-0.3467164	-0.9569793	-0.4003749	0.037755966	-0.3341527	0.5406647
"33147_at"	0.09007931	0.062690735	-0.077121735	-0.080207825	0.06386328	0.1439681	0.01837349
"33148_at"	-0.41642475	0.03083849	0.0748353	0.076375484	-0.18965769	-0.28759718	0.18748903
"33149_at"	0.084076405	0.124222755	-0.13692093	-0.20798206	-0.16366243	-0.10779238	0.026856422
"33150_at"	0.13317347	0.004024506	0.032482624	-0.07630491	0.33242846	0.039325237	-0.004024983
"33151_s_at"	0.14011621	0.11620617	-0.052693844	0.096998215	-0.033899307	-0.0884676	-0.18218136
"33152_at"	-0.01251173	-0.04645729	0.10970545	0.10308313	-0.23467231	-0.16081905	-0.1452303
"33153_at"	-0.121889114	0.27096224	0.18031168	0.115382195	0.26400328	0.014593601	-0.16095877
"33154_at"	-0.11582756	-0.3452239	-0.14210033	-0.13114643	0.21793461	0.38723946	0.13717079
"33155_at"	0.30079508	0.17854548	0.16985273	0.017061234	0.003903389	0.02254057	-0.0845108
"33156_at"	0.25137568	0.23228598	0.09352207	0.15621758	0.14314938	0.18503714	-0.2798977
"33157_at"	-0.9284749	0.17108202	-0.5547166	0.20276117	-0.55210066	-0.19581652	0.16222143
"33158_at"	-0.23353195	0.051252365	-0.16927004	0.046744347	-0.058021545	-0.016586304	-0.06539154
"33159_at"	0.17204475	0.14468145	0.3401723	0.069684505	0.10150719	0.06419563	-0.15491724
"33160_at"	0.1253624	0.2847395	0.054816246	-0.021071434	0.11762953	0.10796785	-0.010996342
"33161_at"	0.11076641	0.46292973	-0.011521339	-0.17263603	-0.018784523	-0.14571476	0.03817177
"33162_at"	0.026587486	-0.14138174	0.08807087	0.1843648	0.5310354	0.37563276	-0.18210793
"33163_r_at"	0.100978374	-0.15882301	-0.013056278	-0.06851816	0.024873734	-0.057369232	0.05718279
"33164_at"	0.04288435	0.057803154	0.010477066	-0.05076742	0.03614664	-0.010477066	-0.08602047
"33165_at"	-0.02520895	0.025208473	0.33187342	0.049801826	0.16664743	0.041225433	-0.23981953
"33166_at"	0.007567406	0.021047115	0.26990557	0.09071493	-0.029950619	0.022769928	-0.11147213
"33167_r_at"	0.26379728	0.24101067	0.34000874	0.13689184	-0.12528086	-0.004928112	-0.007305622
"33168_at"	-0.49810457	-0.4139223	0.023051262	0.17086983	-0.20597553	0.22034216	-0.023051262
"33169_at"	0.007061958	0.08544111	0.62060356	-0.09645796	0.01685667	-0.20681429	-0.07714319
"33170_at"	0.046845913	-0.14846897	-0.17752028	0.06600714	-0.024495125	-0.15868473	0.054426193
"33171_s_at"	0.22440195	0.16689062	0.6751685	-0.08764887	0.19738865	0.01521492	-0.08210516
"33172_at"	-0.07071447	0.011724949	-0.04070902	-0.011725426	0.05036068	-0.04633999	0.017559052
"33173_g_at"	-0.26565027	-0.28221416	-0.048075676	-0.025314808	0.025314808	0.30471897	0.028562069
"33174_s_at"	-0.004869938	0.002188683	-0.08388281	-0.022965431	-0.002188683	0.19087076	0.051787376
"33175_at"	-0.13425207	-0.3325405	-0.18402863	-0.018083096	0.19188547	0.19807482	0.018082619
"33176_at"	0.3250785	0.4005661	0.22129345	0.088092804	-0.103816986	-0.08760071	-0.17553663
"33177_at"	0.07529259	0.071269035	0.014245987	0.06150341	0.058455467	0.006612778	-0.26433086
"33178_at"	0.12940788	0.14767265	-0.058555603	0.1487627	-0.1330204	-0.18876648	-0.09317207
"33179_at"	0.13601685	0.33310843	0.024354935	-0.20782804	-0.1855011	-0.22844791	-0.060317516
"33180_at"	0.005368233	-0.63581276	-0.00536871	-0.7159972	0.31976175	-0.026734352	0.59634304
"33181_at"	0.101661205	0.009923697	-0.10345769	-0.03775835	-0.07839799	-0.12306571	0.060328722
"33182_at"	0.20426798	-0.47817707	0.5026326	0.30219555	-0.41187906	-0.70902824	-0.20426846
"33183_at"	0.37239408	0.26563072	0.1420083	0.101509094	0.19153547	0.118103504	-0.232203
"33184_at"	-0.093120575	0.07418299	-0.11321306	0.074971676	0.0319705	-0.02639389	-0.14034271
"33185_at"	-0.027940273	0.27620506	0.014324188	-0.21787405	-0.011105537	0.20880795	-0.074727535
"33186_i_at"	-0.501174	-0.16305399	0.047976494	0.18498945	-0.13172436	-0.10083914	-0.047976494
"33187_r_at"	0.19448376	0.037460566	-0.075672865	-0.1356678	0.13770223	-0.005727053	0.005727053
"33188_at"	-0.24173927	0.28762293	-0.17581463	0.31702995	-0.01603508	-0.123832226	-0.21600866
"33189_at"	0.26343155	-0.10194063	0.18825912	0.00293684	0.10399389	0.004756928	-0.08999634
"33190_g_at"	0.2769804	-0.027187824	-9.70E-04	8.97E-04	-0.03905058	0.17628622	0.104043484
"33191_at"	-0.29675198	-0.24712801	0.002573013	-0.12729454	-0.003199101	0.22843218	0.53947353
"33192_g_at"	-0.3081317	-0.06528044	-0.18275309	-0.3835745	0.13530684	0.39366674	0.6877632
"33193_at"	-0.016669273	-0.036046028	0.22044992	-0.11180973	-0.0197649	-0.19334745	0.039460182
"33194_at"	0.07343149	-0.11808872	0.22354412	0.06799221	-0.13036919	0.08864498	-0.025430202
"33195_at"	0.051071167	0.21403551	-0.005396366	-0.09112263	0.15290737	0.3516698	0.019312859
"33196_at"	0.062166214	-0.01314497	0.002899647	-0.030427933	0.03123331	0.0198946	-0.057672977
"33197_at"	-0.4100294	-0.14055729	0.019840717	-0.32087374	0.050306797	0.16366768	-0.019841194
"33198_at"	-0.9297228	0.31400204	0.14170074	0.04198551	-0.5605116	-0.3430338	-0.02297306
"33199_at"	0.21794605	0.033875465	0.31514788	-0.1268692	0.15278006	0.055356503	-0.085950375
"331_at"	0.113723755	0.004905224	-0.123067856	0.12772322	0.008209705	-0.05144596	-0.1602683
"33200_at"	0.22548294	0.100969315	0.20297337	0.13087368	0.001138687	0.009872437	-0.28981447
"33201_at"	0.045351982	0.1408968	-0.09288931	0.052232265	0.18494272	0.15105629	-0.17672825
"33202_f_at"	-0.11467552	-0.003036976	0.20197201	0.26683235	0.003037453	-0.040268898	-0.055146217
"33203_s_at"	0.049438953	0.047764778	0.030293941	-0.045897007	0.048182964	-0.1900816	-0.109065056
"33204_at"	0.1744628	0.15901184	0.17296982	0.005390167	0.024502754	0.027542114	-0.2704711
"33205_at"	-0.19644833	0.107337	0.10789156	0.005655289	0.068128586	0.1694746	-0.004582405
"33206_at"	0.14424849	0.012500763	0.03623581	0.17648649	-0.18288708	-0.3958311	-0.19694948
"33207_at"	-0.1706543	-0.08142662	-0.55003405	0.003014565	0.19049168	-0.18650293	0.08411455
"33208_at"	0.035155773	0.040120125	-2.85E-04	-0.022890568	0.14267254	-0.017580032	-0.024873257
"33209_at"	0.057023525	0.20444107	0.11736822	0.006965637	-0.17896414	-0.2119708	-0.21419382
"33210_at"	-0.12919283	0.10895252	-0.101448536	-0.06304932	-0.003118038	-0.23758078	0.016899586
"33211_at"	0.08156109	-0.021421432	0.30043697	0.18997765	-0.13124657	-0.18188953	-0.15559673
"33212_at"	-0.74298	0.50020075	0.47096634	-0.046509743	-0.9174199	-0.33471727	0.152071
"33213_g_at"	-0.32983208	0.40796185	0.48560047	-0.14005184	-0.4339733	0.04090309	0.017668724
"33214_at"	0.26214027	0.46173906	0.1721034	-0.064638615	-0.03569603	0.03569603	-0.4534645
"33215_g_at"	-0.015313149	0.13199234	0.010463715	0.007469177	-0.001124382	-0.15169144	-0.07023811
"33216_at"	0.3888626	0.46355486	0.58801985	0.023368835	0.1336155	0.21368408	-0.1716137
"33217_at"	0.035621166	-0.05547285	-0.023364544	0.103168964	0.15402842	0.26679087	-0.06325817
"33218_at"	0.27474213	-0.008967876	0.19983625	0.059613705	0.008967876	-0.09718466	-0.04184103
"33219_at"	-0.34035206	-1.2025356	-0.34571457	0.14471626	-0.14471626	-0.29001904	0.37584877
"33220_at"	0.25024605	0.031262875	-0.006845951	0.11913538	-0.08280182	0.006845951	-0.09890127
"33221_at"	-0.085226536	-0.019631386	0.090001106	0.13426208	-0.10781765	-0.09575367	-0.08961964
"33222_at"	-0.06826067	-0.19529486	0.06826067	-0.29987097	0.9870777	0.5399461	0.7498517
"33223_at"	0.03175354	0.30454063	0.4746213	0.3393321	0.120598316	0.21860981	-0.24687147
"33224_at"	0.10757542	0.19176102	0.22131252	0.082258224	-0.09132099	0.120038986	-0.1545124
"33225_at"	0.092348576	0.14144897	-0.1264615	0.24312115	0.059752464	0.1447258	-0.10558176
"33226_at"	0.10560608	0.10389042	0.062241554	0.029354095	0.008473396	-0.046076775	-0.112407684
"33227_at"	0.22216225	0.12568712	0.545207	0.042145252	0.08391571	0.26133633	-0.13594818
"33228_g_at"	-0.41874218	-0.41014957	-0.046499252	0.3483634	-0.01061964	-0.4848013	0.010619164
"33229_at"	0.23970413	-0.089823246	-0.19717503	-0.0711112	-0.076416016	-0.22394133	0.12815666
"33230_at"	0.05895233	-0.39219046	-0.1402359	0.1671524	-0.00157547	-0.005551338	0.2284708
"33231_at"	0.06525755	0.1807046	0.26522446	0.023988247	-0.25907516	-0.07182503	-0.15767479
"33232_at"	-0.0642457	0.12880802	-0.54138565	0.8794699	-0.123380184	0.026931763	-0.054561615
"33233_at"	0.085820675	0.059284687	-0.08515549	-0.14461184	0.023881435	0.104445934	-0.029640675
"33234_at"	-0.1848998	0.15511513	-0.11674976	-0.13263941	0.018506527	0.039762497	0.10392141
"33235_at"	-0.17771149	-0.018501759	-0.5144601	0.008982182	-0.5622153	-0.30421066	0.00483942
"33236_at"	0.10543203	0.41613722	-0.27079153	0.08186436	-0.08731651	-0.09626722	0.019354343
"33237_at"	0.47646046	0.50325584	0.27256584	0.051933765	0.14379692	0.33568954	-0.087201595
"33238_at"	-5.20E-04	0.04181719	-0.07654762	-0.022039413	-0.08149576	0.01163435	-0.036084175
"33239_at"	-0.022125006	0.022125244	-0.091457605	-0.12297392	0.1729343	-0.14115334	0.13812661
"33240_at"	0.3589306	0.004627466	-0.02848816	-0.004627466	0.060923338	0.16124582	0.47729015
"33241_at"	-1.7084408	-0.1741991	-0.9721637	0.05021763	0.026534557	0.23413992	0.06323099
"33242_at"	0.019474983	-0.019474983	0.17171574	-0.07344484	0.30128956	0.2668476	0.0850873
"33243_at"	0.22530937	-0.06344271	-0.09969616	-7.12E-04	0.15179062	0.02124548	-0.14378405
"33244_at"	-0.041579247	-6.50E-04	0.39570618	-0.23498201	0.17677069	0.08296013	0.007090569
"33245_at"	-0.28249168	-0.21981049	0.053359985	-0.25130844	0.30794716	0.57909584	0.32191563
"33246_at"	0.04856968	0.1994996	0.32925844	-0.012713909	0.017275333	0.2896862	0.012714386
"33247_at"	-0.12672567	-0.5223322	-0.35057974	-0.1014204	-0.00696373	0.025701523	0.3046856
"33248_at"	-0.06733179	0.18307686	0.08768082	0.06483555	-0.007439137	-0.03836012	-0.22347593
"33249_at"	-0.6328125	-0.103871346	-0.4824481	-0.34138918	0.034606457	0.113081455	0.3015957
"33250_at"	0.21037483	0.23945189	0.7162185	1.53E-04	-0.23391438	-1.54E-04	-0.103607655
"33251_at"	0.11480427	-0.17100906	-0.20553207	0.13557816	-0.20422745	-0.1362524	0.004230499
"33252_at"	0.26513958	0.29262304	0.1877141	0.011753559	-0.101631165	0.10477257	-0.14084291
"33253_at"	-0.042393208	0.7002926	-0.17305565	-0.17570066	-0.102057934	-0.054424286	0.052861214
"33254_at"	-0.008318424	-0.23563528	-0.041517735	0.47843838	-0.14663076	-0.055124283	0.008318424
"33255_at"	0.015477181	-0.092720985	-0.18112993	0.08912754	0.00220871	0.054212093	0.005419254
"33256_at"	-0.4749775	0.040898323	-0.08998966	0.041056633	0.08827305	0.20708418	-0.115213394
"33257_at"	-0.12656546	0.19409132	-0.011239529	0.008629322	-0.008629322	0.11145115	-0.07963085
"33258_g_at"	0.1956954	0.1507783	0.107215405	-0.0413332	-0.11372852	-0.008226872	-0.053151608
"33259_at"	0.07348299	-0.009655952	0.009655952	0.08811903	0.13252163	0.10866451	-0.02195263
"33260_at"	0.081281185	-0.15652132	-0.24046087	0.040855885	-0.12894535	-0.18685865	0.010555744
"33261_at"	0.06356335	-0.059464455	0.18568993	-0.007021904	-0.082294464	-0.0909071	-0.015272141
"33262_at"	-0.060267925	-0.11827421	0.44495344	0.2706666	-0.015114307	-0.4083686	-0.009604931
"33263_at"	-0.72979546	-0.33099556	-0.14740515	-0.81684685	0.4015813	0.21026897	0.25584364
"33264_at"	-0.5425801	0.024936676	-0.07009983	-0.7570934	0.08054733	0.12232542	0.029533863
"33265_at"	-0.31158018	-0.21742201	-0.26139927	0.19018555	0.088862896	-0.016456127	0.07841587
"33266_at"	0.0507679	0.08945942	-0.18131733	-0.01272583	-0.047800064	0.19813824	-0.04328823
"33267_at"	-0.21424818	-1.069273	0.55594206	-0.009738922	-0.49897528	-0.41048765	0.009738922
"33268_at"	0.538146	-0.11316395	0.007893562	0.13274193	-0.007893562	-0.25135803	-0.13693047
"33269_at"	0.23104954	0.16914272	0.30549526	0.13659763	0.121273994	0.14976215	-0.3246565
"33270_i_at"	-0.21386623	-0.08111477	-0.11827612	0.07452631	-0.07452607	-0.15225363	0.23779297
"33271_r_at"	-0.14320803	-0.02829194	-0.025439262	0.02142787	-0.014164448	0.13486838	0.017570496
"33272_at"	-0.09063673	0.05966711	0.005405903	-0.07643223	2.6920128	0.06361103	0.16235828
"33273_f_at"	2.8276062	-0.24012518	-0.2818823	0.16236305	0.34011936	1.8397226	-1.0095091
"33274_f_at"	2.9465237	-0.070724964	-0.38705778	0.026882172	0.553277	2.0149183	-0.68581057
"33275_at"	0.24693966	-0.109677315	0.027952194	0.059506416	-0.09368038	-0.0072155	-0.15110064
"33276_at"	0.22653818	0.11965656	0.38827038	0.09378052	-0.10210085	0.09959459	-0.14302206
"33277_at"	0.005124092	-0.005124092	-0.19122648	0.043658733	-0.07026768	-0.068208694	0.006531715
"33278_at"	0.003532887	0.06218767	-0.08033657	-0.10928249	-0.14123726	-0.048934937	0.13487577
"33279_s_at"	0.5086112	0.028506756	0.47020435	0.01706934	-0.079657555	0.04725504	-0.026873589
"33280_r_at"	0.071824074	0.13712502	-0.30367088	0.009445667	-0.082009315	-0.38376856	-0.20792961
"33281_at"	-0.009083271	0.21341753	-0.00134182	-0.108043194	0.056634903	-0.01783371	-0.019103527
"33282_at"	0.24467373	0.20817566	0.12115955	-0.06631756	-0.067196846	0.012821198	-0.012820721
"33283_at"	0.037614822	0.08938217	0.8882551	0.4998846	-0.037614822	-0.16117954	-0.053779602
"33284_at"	0.011528969	0.09531021	0.12521315	-0.03136921	0.13536835	1.7938285	-0.051541805
"33285_i_at"	0.065799	-0.006233692	-0.017625332	0.006233692	0.10580444	0.18529105	0.25170636
"33286_at"	0.1293912	0.17732239	0.26578522	0.07077122	-0.10120106	0.11915779	-0.19830036
"33287_at"	0.03321743	-0.018342972	0.018238068	0.09318924	0.08459091	-0.07442665	-0.08559513
"33288_i_at"	0.19781637	0.16074038	0.2457242	-0.22678804	-0.040637016	0.002763271	0.36219025
"33289_f_at"	0.102276325	0.011582851	0.105559826	-0.011582851	-0.028979301	-0.19613838	0.44131565
"33290_at"	-0.12661695	-0.20534372	0.04475403	0.12771463	0.19761944	0.07963085	0.076152325
"33291_at"	-0.0037117	0.07858944	0.17847157	-0.026983738	-0.09801459	-0.103247166	0.0037117
"33292_at"	0.001092911	0.18235588	0.05131817	-0.004990578	0.1919012	0.26065063	-0.001092911
"33293_at"	0.4149475	0.14680386	0.14354706	0.07434654	0.035806656	0.17340088	-0.06331062
"33294_at"	-0.19459248	-0.12807608	-0.08670616	-0.14953709	0.2714615	0.11934757	0.20244503
"33295_at"	-0.045827866	0.17282724	0.55575466	0.2489438	0.045827866	-0.09443331	-0.049141884
"33296_at"	0.017661572	-0.28774548	-0.0355587	-0.28349686	-0.12504101	-3.40E-04	0.042654037
"33297_at"	-0.5866089	-0.4930868	0.027009487	0.18103981	-0.099006176	0.15470505	-0.027009487
"33298_at"	-0.019656658	-0.00916338	0.2425971	0.07880211	0.123466015	0.16699314	-0.13444543
"33299_at"	0.13155746	-0.35868692	-0.13758135	0.013297081	0.44147587	-0.1384716	0.412601
"332_at"	-0.1687417	6.73E-04	-0.1529994	0.15896034	0.032880306	-0.1594119	-0.03562832
"33300_at"	0.19492579	-0.2970004	-0.070411205	-0.10598993	-0.05205345	0.22843027	0.1753974
"33301_g_at"	0.22790956	-0.036131382	0.051909447	0.030628204	0.1404643	0.12812805	0.09073448
"33302_at"	-0.03338194	0.17133641	-0.1524272	0.37198472	0.011092424	-0.029149055	-0.06728053
"33303_at"	-0.33911085	-0.032182217	-0.13463163	0.43848896	-0.117376804	0.16875648	0.053227425
"33304_at"	0.26397133	-0.17123699	-0.2458868	-0.51418686	0.38568163	0.14843178	0.18479872
"33305_at"	-0.110880375	-0.12120342	-0.28931952	-0.1046319	0.75155115	-0.23968506	0.16326332
"33306_at"	0.11203909	0.005216122	-0.12006712	0.029539585	0.07486868	-0.05386114	-0.116615295
"33307_at"	0.04478407	0.002179146	0.19908953	-0.002179623	0.019946098	0.2086258	-0.12463808
"33308_at"	-0.01678276	0.39025688	0.14457703	0.01678276	-0.1827898	0.082803726	-0.1572609
"33309_at"	0.008624077	0.01670909	0.09340167	0.006176949	0.14103866	-0.055032015	-8.24E-04
"33310_at"	0.08112121	-0.009583473	0.08584666	0.071757555	8.00E-04	-0.13775873	0.072081804
"33311_at"	0.34000778	0.14230156	-0.007387161	0.005405426	-0.001009941	0.19714832	0.001009941
"33312_at"	0.05211687	0.18062639	0.12949705	0.19187975	0.09826183	-0.012512207	-0.20343113
"33313_g_at"	0.12064171	0.14168072	-0.16806602	0.003261566	0.094414234	0.32367086	-0.033195496
"33314_at"	0.17140293	0.39898443	0.14680624	0.02594471	0.037726402	-0.032400608	-0.15034771
"33315_at"	-0.035710335	-0.044801712	-0.05927229	0.13454342	0.07952356	-0.1016922	-0.014715672
"33316_at"	0.073366165	0.10222316	-0.079960346	-0.22227335	0.1714437	0.03879571	0.26541162
"33317_at"	0.021314144	0.7841096	0.31490135	-0.07791805	-0.022967339	0.058490276	0.08967543
"33318_at"	0.19670701	0.18216586	-0.060480356	0.16644883	0.008680105	-0.11593056	-0.008680105
"33319_at"	0.16116905	-0.020005226	-0.027223587	0.027977943	0.043395042	-0.18906021	-0.065862656
"33320_at"	0.03430319	-0.053126812	0.36474752	0.2518959	-0.08511686	-0.21524763	-0.020874977
"33321_r_at"	0.32280493	0.27655268	0.15604067	-0.033035755	0.15788889	0.32570505	-0.20269156
"33322_i_at"	0.07909489	-0.038337708	-0.08499813	-0.019758224	0.27361488	0.17242527	0.064240456
"33323_r_at"	-0.13081741	-0.016031265	-0.15534115	0.018172264	0.1244812	-0.018573761	0.015976906
"33324_s_at"	-0.005876064	0.010272026	0.121136904	-0.05501485	0.11125445	0.147367	0.01602006
"33325_at"	-0.66891336	-1.7492108	1.0239406	0.5941787	-0.07750845	-0.48593473	0.23858547
"33326_at"	-0.001313686	-0.3203082	-0.0661912	-0.12871647	-0.11374283	-0.23728228	0.13329172
"33327_at"	-0.05082178	0.025105	-0.16808748	-0.12246561	0.22674942	0.016203403	-0.058964252
"33328_at"	0.20820665	-0.002017498	-0.4794221	0.11583471	-0.1097455	-0.3359604	0.002017021
"33329_at"	0.05783844	0.6062126	0.39258003	0.30860043	-0.45080948	-0.3140111	-0.24044657
"33330_at"	0.1091094	0.1749754	-0.09042454	0.14099455	0.4549551	0.1109252	-0.047740936
"33331_at"	0.033022404	0.060965538	-0.042087555	0.09912014	0.05000496	-0.081531525	0.003282547
"33332_at"	0.079818726	0.19067192	-0.26749468	0.016409874	0.106850624	-0.056738377	-0.016409397
"33333_at"	-0.1592555	-0.009439945	-0.24062347	-0.07473135	0.009439945	0.05511713	0.048434258
"33334_at"	-0.20824528	0.4005723	0.022799015	-0.022799015	0.1303587	0.16346121	0.05387211
"33335_at"	-0.11864281	0.07175875	0.057176113	2.89E-04	-2.89E-04	-0.07995224	0.006283283
"33336_at"	0.024024963	-0.15122938	-0.12512064	2.16E-04	-0.06885624	0.15701628	-0.015789509
"33337_at"	-0.14132404	-0.090559006	-0.5974479	-0.3615055	0.22588062	0.4803629	0.25833797
"33338_at"	0.9162712	1.1991892	0.14761972	-0.18855715	-0.040697098	-0.42940187	-0.07945824
"33339_g_at"	1.7004361	0.9741335	0.2562337	-0.18281317	-0.3759408	-0.29221106	-0.1687789
"33340_at"	-0.27600622	-0.0901804	-0.10740948	-0.037361145	-0.20400047	-0.049321175	0.36852455
"33341_at"	-0.04073143	-0.5113306	-0.01752472	-0.04306221	-0.1345911	0.29276562	0.23692417
"33342_at"	0.25629902	0.068950176	-0.05182123	0.2041359	0.0418787	-0.0895319	-0.23294067
"33343_at"	-0.27972412	-0.004672527	-0.17479515	-0.08245897	-0.22773743	0.004672527	0.2087493
"33344_at"	-0.10647154	0.11069536	0.044615746	-0.106172085	0.008218765	0.015981197	-0.15861988
"33345_at"	-0.1501503	0.08390045	0.07622528	-0.033647537	-0.09829855	-0.016421318	-0.008830071
"33346_r_at"	0.38385963	-0.025599003	-0.14672709	0.00888586	-0.047939777	0.14758062	-0.008885384
"33347_at"	0.3680091	0.42368603	0.61370707	-0.056892395	0.20867777	0.28124523	0.055300236
"33348_at"	-0.5225396	-0.014546394	-0.26974392	-0.005401135	-0.1922493	-0.18888903	0.5909653
"33349_at"	0.24722433	0.6137686	-0.034035206	-0.1871314	-0.07779932	-0.23418522	-0.108510494
"33350_s_at"	0.0325346	-0.00477314	0.37020397	0.051506042	0.17054033	0.20326948	0.00477314
"33351_at"	0.13802814	-0.60254145	-0.44983006	-0.18992138	0.19955158	0.1214304	0.22702837
"33352_at"	-0.47927427	-1.3145237	-0.3089099	1.1375794	0.1732359	0.4942274	-0.012443066
"33353_at"	-0.38895798	-0.1253376	0.15904331	0.7364316	-0.20967007	0.1253376	-0.15743494
"33354_at"	-0.07817078	-0.20661283	-0.07027674	0.015049458	0.42307425	-0.03037262	0.27640104
"33355_at"	-0.38971472	-0.7483759	-0.11111641	-0.5612335	-0.028579712	0.023255825	1.0232239
"33356_at"	0.11661816	0.07777166	-0.018994331	-0.27721405	0.24145031	0.24880505	-0.24033165
"33357_at"	0.013520718	-1.2919607	-0.59915066	-0.11848593	0.09940243	-0.013520718	0.3643632
"33358_at"	-0.24685812	-0.16183805	0.12862492	-0.07605028	-0.04531336	0.100082874	-0.08776665
"33359_at"	0.6273222	0.029065132	-0.17549849	-0.029065132	-0.11160588	0.07561779	-0.31514287
"33360_at"	0.42106342	0.011276245	-0.17946625	-0.015120983	-0.011276245	-0.14953375	0.12786102
"33361_at"	0.40355873	-0.2658348	0.39976692	0.16993332	-0.07965946	0.10641575	0.07612038
"33362_at"	0.19806957	-0.014586449	0.036093235	0.060514927	0.3236227	0.014586449	-0.025441647
"33363_at"	0.003911018	0.20113802	0.06798887	-0.050685406	0.13589239	-3.00E-05	-0.17485237
"33364_at"	-0.18681145	0.19836473	-0.49228573	0.056102276	-0.043764114	0.7169962	0.12298393
"33365_at"	-0.001859665	-0.22585869	0.001859665	0.09449577	-0.2880144	-0.28672266	0.09775448
"33366_at"	0.046134472	0.07436037	0.42753983	0.15373087	-0.001884937	-0.1627059	0.001884937
"33367_s_at"	-0.4813342	-0.64470005	-0.14290762	0.36158562	0.047362804	-0.29073715	0.43633604
"33368_at"	-0.90384054	-1.1140985	-0.70582867	0.35117626	0.12746191	-0.12746191	0.5581083
"33369_at"	0.22636652	-0.73788357	-0.39255333	-0.30021334	-0.0639987	0.25736952	0.916944
"33370_r_at"	-0.024264812	0.06450415	-0.06018448	-0.004529476	-0.12444425	-0.1119709	0.45113087
"33371_s_at"	-0.34490633	0.21266651	-0.036967754	0.031550884	0.16026545	-0.04795742	0.022121906
"33372_at"	-0.17918062	-0.075493336	-0.47233534	0.11018038	-0.12926674	-0.41852236	0.062418938
"33373_at"	0.11979914	-0.7147317	-0.550179	-0.03887415	-0.020584583	-0.09430313	0.20244455
"33374_at"	0.30349684	0.074035645	0.2243495	0.055989742	-0.16838741	0.054745674	-0.10611963
"33375_at"	-0.05743313	0.012070179	-0.44745874	-0.09926081	0.07939434	-0.08918285	0.040249348
"33376_at"	0.02086687	0.09758234	0.15141344	-0.21754026	0.036904335	0.0809412	-0.11137581
"33377_at"	0.014752388	0.075901985	0.02838707	0.03343439	0.16621733	-0.01706028	-0.10737753
"33378_at"	-0.30447578	-0.1623354	0.12169266	-0.21829224	-0.10736656	-0.029097557	0.23578835
"33379_at"	-0.15680218	-0.003415823	-0.029609919	-0.032773018	0.025786161	0.1643734	0.004295349
"33380_at"	0.032134056	0.3056321	-0.40732765	-0.22724152	0.050558567	-0.013593674	-0.012841225
"33381_at"	-0.35800838	-0.21787691	-0.51201963	-0.3703761	-0.656713	-0.47442245	0.36567497
"33382_at"	-0.11977196	0.17503357	0.22198963	-0.121031284	-0.02628231	0.39710522	0.071658134
"33383_f_at"	0.26292515	-0.24985123	-0.10036516	0.08257961	-0.2640872	-0.2360611	-6.81E-04
"33384_at"	0.026721478	-0.024976254	0.04078722	0.029776096	0.15515041	-0.0732708	-0.10923052
"33385_g_at"	-0.19380808	-0.017227173	-0.26556015	-0.32177544	0.052825928	0.027721882	0.12685823
"33386_at"	-0.06592226	-0.2167468	0.013486385	-0.013486385	0.4828024	0.3011551	0.17066765
"33387_at"	-0.002814293	-0.11915779	0.1432395	0.03395176	-0.12523413	-0.109639645	0.20648575
"33388_at"	-0.5229187	-0.106874466	0.02237606	0.017443657	-0.37530994	0.023611069	0.09027195
"33389_at"	-0.21598053	0.03889513	0.330997	0.16880322	-0.0987916	-0.06473875	-0.0642705
"33390_at"	0.1423769	0.13158226	-0.08431435	-0.033605576	0.17770767	0.22000885	0.02233982
"33391_r_at"	0.24224472	0.14554119	0.21789742	-0.027581215	0.027581215	0.13658524	-0.11236191
"33392_at"	-0.02497387	-0.41110086	0.1196661	-0.001234055	0.11484623	0.12462044	-0.052567482
"33393_at"	0.13600206	0.048811436	0.39826536	-0.041380882	-0.053820133	-0.32339764	-0.10902405
"33394_at"	-0.25220728	-0.13182831	-0.22252369	-0.28964996	-0.12851381	-0.2584734	0.5790205
"33395_at"	0.19302082	0.06915283	0.20608711	0.21244049	0.004144669	0.1684103	-0.18604088
"33396_at"	-0.5512266	-0.73438025	0.07588959	-0.7484951	0.61953926	0.6749611	0.73906136
"33397_at"	-0.14093971	0.21491718	0.060045242	0.13653946	0.007925987	0.06655598	-0.1522398
"33398_at"	0.19986725	0.20399094	-0.040514946	0.13029766	-0.059646606	-0.14824867	-0.16509914
"33399_at"	-0.48795366	1.363802	-0.13502407	1.2104607	-0.2647767	-0.43347692	0.18815804
"333_s_at"	0.17970324	0.051779747	-0.6683154	-0.5586276	0.23552132	0.07731581	-0.1752882
"33400_r_at"	-0.052580595	0.16742015	-0.08458185	0.25126314	-0.1317501	-0.007727623	0.07612467
"33401_at"	0.086230755	0.16972685	-0.045556545	0.07159853	0.17978859	0.2606659	-0.117319584
"33402_at"	-0.32986832	0.6440511	0.40139866	-0.32390022	-0.37095642	-0.38558483	0.14076519
"33403_at"	0.046548843	-0.78792	-0.34892464	0.07689381	-0.18607855	-0.3984022	-0.011508465
"33404_at"	0.007347107	0.04561138	0.93544006	-0.34855652	-0.23313141	-0.19966507	0.024651527
"33405_at"	-0.015898228	-0.43319416	1.2843599	-0.31483746	-0.20545721	0.015898228	0.124325275
"33406_at"	0.040109634	0.005815506	-0.2122345	-0.07512522	0.007099152	-0.04138136	-0.025304317
"33407_at"	-0.036664486	0.18414307	0.001891613	-0.26246452	-0.20240498	-0.09836769	0.04974079
"33408_at"	-0.3098898	0.16616678	-0.16541386	-0.36653185	0.05572748	-0.10093832	0.08702898
"33409_at"	-0.07293606	0.056628227	-0.47531605	-0.27102852	0.34582138	0.68830585	0.53867626
"33410_at"	0.30209827	0.34129524	0.27137852	-0.12545824	-0.0812788	0.14553595	-0.02567339
"33411_g_at"	0.11960268	0.15507126	-0.07399225	0.037457943	-0.1957941	0.1996789	-0.12076855
"33412_at"	0.50426865	0.87585735	-0.50895023	-0.22072792	-0.20747566	0.026128769	0.12021065
"33413_at"	1.0040379	0.0771575	0.19600868	-0.29529	-0.028607368	-0.26518726	0.028607368
"33414_at"	-0.11157036	-0.17353058	-0.03489971	0.12552643	-0.34390736	-0.18751049	-0.12438488
"33415_at"	-0.20168686	-0.08344269	0.20173264	-0.08958721	0.18702888	0.007045746	-0.007045746
"33416_at"	0.094818115	0.08004093	0.21741104	0.027165413	-0.03083992	-3.23E-04	-0.092597485
"33417_at"	0.025752544	0.006865025	0.05009079	0.034347534	-0.17422819	-0.16516066	-0.07567215
"33418_at"	-0.3231163	-0.5316248	-0.23196363	-0.003176689	-0.01154995	0.26557636	0.34807205
"33419_at"	-0.15207815	-0.022207022	0.06873679	-0.038294554	-0.16422653	-0.09857249	0.07004571
"33420_g_at"	-0.10911322	-0.4422698	-0.40714788	0.0848403	0.12689543	-0.0848403	0.27551603
"33421_s_at"	0.14164305	-0.37191582	-0.6482892	-0.36159706	-0.14585924	0.004479408	0.44893074
"33422_at"	-0.29112864	0.5272889	0.16443586	-0.062066555	-0.043661118	-0.34806108	0.06470823
"33423_g_at"	-0.4916315	0.17345238	0.5128269	-0.05452919	0.17708302	-0.06985092	0.05452919
"33424_at"	-0.090075016	0.104111195	0.09017134	-0.25672913	8.49E-04	0.32600307	0.23013449
"33425_at"	0.017104149	0.25358582	0.46282768	0.40964413	-0.12960243	-0.018904686	-0.23636055
"33426_at"	-0.19072056	0.45168018	0.23066139	0.017310143	0.21023273	-0.32968044	-0.055060387
"33427_s_at"	0.23623037	0.1950326	-0.059723377	0.3439026	-0.18608141	-0.23471165	-0.2528844
"33428_s_at"	0.31172132	0.36045456	0.116517544	0.04266405	-0.32369995	-0.23846912	-0.31214857
"33429_at"	0.2582202	-0.0605855	-0.31569576	-0.13387156	-0.0905242	0.056198597	-5.15E-04
"33430_at"	-0.02411604	0.018033504	-0.004041672	0.16234684	-0.107236385	-0.04844761	-0.052596092
"33431_at"	-0.048106194	-0.06706715	0.044264793	-0.04426527	0.38597202	0.13707829	0.23122168
"33432_at"	-0.14712524	0.15560198	0.17381573	-0.003131867	-0.06924057	-0.06808758	-0.18665743
"33433_at"	-0.06145525	0.17969894	-0.006493568	0.00203085	-0.19172907	-0.15650558	0.13109207
"33434_at"	-0.27204895	0.30929708	-0.042446613	0.9248357	-0.40162373	-0.7941489	-0.25710297
"33435_r_at"	-0.054344893	0.0946486	-0.22964883	0.21651888	-0.15001845	-0.02279973	-0.14263248
"33436_at"	0.107635975	-0.23118734	-0.4043479	-0.46379519	0.19774008	-0.13873434	0.5733347
"33437_at"	-0.1310072	-0.03386402	-0.067396164	-0.30558968	0.15948915	-0.07071066	0.11930847
"33438_at"	5.58E-04	-0.69438267	-0.31919384	-0.36389923	0.19117165	-5.58E-04	0.5691643
"33439_at"	0.9651432	-0.00847435	-1.202961	-1.130681	0.00847435	-0.77300215	0.50239563
"33440_at"	-0.25933218	-0.8629184	-0.7535558	-0.033780098	-0.75437355	-0.9170637	0.05635023
"33441_at"	-0.36331654	0.22422504	-0.23794365	0.11434555	-0.21705818	0.0425539	0.026371956
"33442_at"	-0.67948437	-0.026125908	0.08894634	0.45570564	-0.519773	-0.76044273	0.17135763
"33443_at"	-0.80464745	-0.8383217	-0.22939873	-0.14842796	-0.5015359	-0.72095394	0.19416809
"33444_at"	-0.01476717	-0.11807203	0.16916895	0.04312277	-0.09201765	-0.004198551	-0.14106894
"33445_at"	0.17432785	0.42058754	0.025343418	-0.07955074	0.044722557	0.019629478	-0.07379484
"33446_at"	-0.26594305	-0.71559525	-2.1839838	0.33372784	-0.32474804	-0.14245987	0.3907504
"33447_at"	-0.083492756	-0.3794012	-0.9884119	-0.6922083	0.083492756	-0.2891693	0.6098542
"33448_at"	0.15310764	-0.23422337	-0.19696045	-0.015365601	0.036611557	-0.001649857	0.09285927
"33449_at"	-0.005412579	0.005412579	-0.19043636	-0.035398006	-0.07092953	-0.23721266	0.018529415
"33450_at"	0.003605843	0.14517403	-0.003606319	0.040271282	-0.24369907	0.060723305	-0.16392374
"33451_s_at"	-0.11830711	-1.3587751	0.01830101	-0.11108112	-0.1039381	0.19089031	0.3299942
"33452_at"	0.37289906	-0.012318611	-0.10184622	0.6098919	-0.057099342	-0.25366402	-0.09260273
"33453_at"	0.10744858	0.45465946	0.07402897	-0.13715267	-0.020170689	0.08747482	0.020170689
"33454_at"	0.73181534	0.3063593	-0.4751773	0.061715126	-0.056363106	-0.24099636	-0.010998726
"33455_at"	0.13161659	-0.027342796	-0.041646004	-0.063673496	0.087516785	0.9023042	0.027342796
"33456_at"	0.018649101	-0.1528101	0.07658243	-0.018649101	-0.32799053	-0.3472228	-0.03152895
"33457_at"	-0.3672142	-0.2696333	-0.24091768	-0.09141588	-0.16608381	-0.1048336	0.19922781
"33458_r_at"	-0.56031895	-0.59314823	-0.8729925	-0.13276005	-0.046878815	0.046878815	0.46055984
"33459_at"	0.13579178	0.25035048	0.034602642	-0.09268856	0.10447264	0.25646067	0.06107521
"33460_at"	0.051047802	0.013987064	-0.10631132	0.028004646	-0.115823746	-0.18610191	-0.018630028
"33461_at"	-0.07461214	0.6618657	0.075873375	-0.17208672	-0.05395937	0.010504246	0.29220152
"33462_at"	-0.1227541	0.01664114	0.21926737	0.60955715	-0.006948471	0.097994804	-0.028025627
"33463_at"	-0.024411201	0.14558887	-0.049957752	-0.004641533	0.004641533	-0.14167309	0.032139778
"33464_at"	0.14529991	0.14899683	-0.09702253	0.07302904	-0.08752775	0.031480312	-0.06855726
"33465_at"	-0.3071351	-0.12519884	0.09355354	0.03228426	0.43194103	-0.38217402	-0.11670923
"33466_at"	0.01649189	-0.2674923	-0.15519238	0.3305192	-0.038669586	-0.30658722	-0.05253315
"33467_at"	0.0881896	-0.1418457	0.08561516	0.006323814	-0.08321667	-0.2207489	-0.021727562
"33468_at"	-0.085412025	0.28435612	-0.004465103	0.060032845	0.13977098	0.015905857	0.004465103
"33469_r_at"	0.31499672	0.21362257	0.13223314	5.66E-04	-0.063307285	-0.08873892	-0.090568066
"33470_at"	0.05770874	0.0743227	-0.12980175	0.0919714	-0.07167721	0.050201416	-0.21420097
"33471_g_at"	0.40384483	0.38657284	0.44668865	0.033024788	0.103943825	0.40044212	-0.033024788
"33472_at"	0.14464283	0.10060978	-0.15238762	-0.024518967	0.077073574	-0.09516144	-0.108409405
"33473_at"	-0.0164392	0.31628704	0.065300226	-0.30833077	0.00905633	0.13964987	0.2810557
"33474_at"	0.15662718	0.15836859	0.06268406	0.04090309	0.12480688	0.32266283	-0.231534
"33475_at"	0.16278124	-0.058022976	-0.007036209	0.028924465	-0.05408144	-0.25248957	0.007098675
"33476_at"	-0.09140921	0.0218606	-0.08006334	0.027357101	0.11798239	-0.07381439	0.012586594
"33477_at"	0.004629135	0.09083843	0.08757973	-1.33E-04	-0.073925495	-0.05746126	-0.002204418
"33478_at"	0.42282438	0.17848301	0.29014206	0.09508324	-0.11623669	0.27061892	-0.15771818
"33479_g_at"	-0.10671854	0.06761241	-0.21079493	-0.08477688	0.16480494	0.038360596	0.003466606
"33480_at"	-0.033463955	0.088089466	0.6408396	0.03346443	0.067613125	0.10033226	-0.07712078
"33481_at"	0.5854893	0.13806057	0.43970776	7.87E-04	-0.13103247	0.16386223	-0.10463476
"33482_at"	0.104203224	0.111893654	0.41653442	0.16884708	-0.08052921	-0.05834818	-0.12834072
"33483_at"	1.3508239	-0.023425102	0.020503044	0.55526304	-0.15101814	0.18938446	-0.020503044
"33484_at"	0.055156708	-0.42304325	-0.3057232	-0.10251951	-0.13503742	-0.25976372	0.23573065
"33485_at"	-0.5669699	-1.0281935	0.7187948	0.12448025	0.15645504	-0.028766632	0.003440857
"33486_at"	0.108000755	0.011342526	0.2615204	0.011811256	0.05226469	-0.2796917	-0.05354166
"33487_at"	0.41501856	0.20768833	0.043770313	0.16889048	-0.061932087	0.17193317	-0.043770313
"33488_at"	0.16893077	-0.13236713	-0.016512394	0.21828389	0.24697995	-0.1462729	-0.19051504
"33489_at"	0.29116726	0.18054628	0.37486458	0.015768051	-0.28201818	-0.145226	-0.16362
"33490_at"	0.052914858	-0.095695734	0.001833439	-0.036131382	0.14398313	0.0314157	-0.09525752
"33491_at"	0.10117984	-0.08631325	0.24252939	0.084282875	0.025605917	0.21353793	-0.036364555
"33492_at"	0.22351837	0.29007196	0.087631226	-0.12290144	0.2014556	-0.026299	-0.11677551
"33493_at"	0.14353466	0.13210583	0.029410362	-0.029410362	0.17465591	0.22587109	-0.05559063
"33494_at"	-0.08004713	-0.002446175	-0.025867462	0.021958351	0.14788485	0.037552357	-0.029061794
"33495_at"	0.12470245	0.30622768	-0.26488066	0.17531109	-0.36299992	-0.10309839	-0.12088442
"33496_at"	0.03801775	0.29692984	0.443439	-0.023865223	0.003419638	-0.003419876	-0.27396655
"33497_at"	0.19582844	0.2720313	0.37329292	-0.035395145	0.02584505	0.111114025	-0.097500324
"33498_at"	0.29519224	0.21160746	0.1985941	0.059369087	0.022593975	-0.001019955	-0.015598774
"33499_s_at"	3.0534964	-0.35577154	-0.27790308	0.3787794	0.05911255	0.40073776	-0.54662275
"334_s_at"	-0.108605385	0.15064096	-0.17526913	-0.050619602	0.015223026	0.1212492	0.07688856
"33500_i_at"	3.1731462	-0.44149542	-0.34620094	0.5772371	-0.001062393	0.63802814	-0.5200629
"33501_r_at"	2.549096	-0.23400307	-0.10217953	0.10963249	0.10217953	0.37226772	-0.5271244
"33502_at"	-0.045324326	0.20077705	-0.29285908	0.038200855	-0.0861063	0.025924683	-0.21620369
"33503_at"	0.13088226	0.123636246	0.018873215	0.042900085	-0.08966637	-0.06326103	-0.12621307
"33504_at"	-0.053708553	0.028847694	0.1919465	0.0639658	-0.013270855	-0.086203575	-0.21297884
"33505_at"	0.2013874	0.1975689	-0.02330637	-0.099283695	1.1487856	-0.16283941	-0.05661726
"33506_at"	0.12936163	-0.001781464	0.13209867	0.15490246	0.105448246	0.098824024	-0.24535084
"33507_g_at"	0.2648635	0.018246412	-8.98E-04	-0.09028053	0.058736086	0.0705843	0.025908947
"33508_at"	0.022208214	0.15117598	-0.0478549	-0.03382492	-0.010340214	-0.2656579	0.010340214
"33509_at"	0.3026104	0.10758114	0.104800224	0.15880966	0.00991869	0.05483246	-0.20365
"33510_s_at"	0.13597775	0.056003094	0.1640625	0.16547441	-0.004243851	-0.008642197	-0.15584517
"33511_at"	-0.16856956	0.23570299	-0.17772388	0.01706934	0.16498423	-0.09268808	0.020322323
"33512_at"	0.16885805	0.024291515	0.2380867	0.112220764	0.039896965	0.11008406	-0.24313784
"33513_at"	-0.06530666	0.14261341	-0.15239048	-0.034276962	-5.20E-05	0.20927715	-0.061318398
"33514_at"	0.10397339	0.15502405	0.10005617	-0.061459064	-0.03213072	0.14521503	-0.26509333
"33515_at"	0.11779261	0.22328901	0.14721823	0.027719498	0.029506683	0.1602788	0.004831314
"33516_at"	0.27882385	-0.02183628	0.02183628	-0.10582781	0.2703843	3.2838206	-0.06567049
"33517_f_at"	0.97525835	-0.13325453	0.022058487	0.061154366	0.13336086	-0.22228765	-0.11263466
"33518_f_at"	0.45169067	0.26801777	0.07604694	-0.16674495	-0.07859969	0.15923548	-0.009657383
"33519_at"	0.001891136	-0.001891136	0.18097639	0.22265005	-0.13625956	0.061275005	-0.04838276
"33520_at"	0.21071815	-0.047153473	-0.04052925	0.042791843	0.00302887	-0.06697607	-0.00302887
"33521_at"	0.10455036	0.08008003	-0.13346386	0.13316059	-0.05831337	-0.006217003	-0.0957222
"33522_at"	0.21025705	0.2900052	0.23476648	-0.04763317	0.25017166	0.24879503	-0.080302715
"33523_at"	0.20716763	0.21713066	0.26024628	0.05866909	0.021878242	-0.14418364	-0.25656176
"33524_at"	-0.09358263	0.06379223	0.06827068	-0.001721859	0.029635906	0.039651394	-0.060299397
"33525_at"	0.030185223	0.22831583	0.10022044	-0.07292986	0.17710924	0.028100729	-0.028100729
"33526_at"	0.012470245	0.11321449	-0.02020359	0.032665253	0.007190228	-0.08275652	-0.27968884
"33527_at"	-0.20098686	0.080518484	-0.07567811	0.8353777	-0.16128516	-0.053830862	-0.19131231
"33528_at"	-0.01760149	0.04821205	-0.006236553	0.074994564	-0.026460648	-0.032838345	-0.025594234
"33529_at"	0.02119565	0.00947237	0.07003808	0.14557672	-0.12748528	-0.044406414	0.017545938
"33530_at"	-0.007701635	-0.001794338	0.17200089	-0.1583376	-0.08504915	0.4057665	-0.43679667
"33531_at"	-0.009636879	0.009636641	0.13975358	-0.093639374	0.45952368	-0.03219986	-0.10565019
"33532_at"	0.08448124	0.1667285	-0.24071598	0.13840246	0.06258154	-0.16264582	-0.1366682
"33533_at"	-0.071602345	-0.030904293	0.017365932	0.069642544	-0.17894697	-0.2514081	-0.004728317
"33534_at"	0.3888378	-0.030122042	0.037672043	-0.003611803	0.12290764	0.34420085	-0.29526377
"33535_at"	0.17450476	0.17204142	0.06370592	0.094353676	0.002072811	-0.002072811	-0.1206274
"33536_at"	0.058151484	0.15059686	-0.09596062	0.13133335	-0.07795882	0.018045425	-0.05029869
"33537_at"	0.063406944	0.1296835	0.28525686	0.114276886	-0.006590843	0.08810282	-0.07787657
"33538_at"	-0.4424932	-0.41489792	0.1917119	-0.07769346	-0.2867694	-0.12598085	0.4885211
"33539_at"	-0.14551735	0.094183445	-0.106526375	0.03503418	-0.13318491	-0.23893023	-0.048627377
"33540_at"	-0.04679346	-0.05867052	-0.15236664	-0.11924887	-0.07107401	-0.17164469	0.085104465
"33541_s_at"	0.15883303	0.019105434	0.08025074	-0.07753563	0.037505627	0.105814934	-0.1582241
"33542_at"	0.16934538	0.019642353	0.26255417	0.062655926	0.09940243	0.0499115	-0.19903278
"33543_s_at"	-0.2508335	-0.013605595	-0.5490427	0.4896431	-0.16214705	-0.5613742	0.34392214
"33544_at"	-0.04208517	0.07364321	-0.006109715	-0.03924489	-0.015981436	0.054377556	0.054807186
"33545_at"	0.22051144	0.02869606	0.14144611	0.21696377	-0.12482357	-0.02869606	-0.15553093
"33546_at"	0.114165306	-0.034752846	0.012516975	0.07119846	0.021033287	-0.15815735	-0.043603897
"33547_i_at"	-0.17955112	0.027581692	-0.09035134	0.005584717	0.09601736	-0.00921154	-0.091585636
"33548_f_at"	-0.005125046	0.036316395	0.11888194	0.10102296	-0.03530717	0.23155403	-0.27461863
"33549_at"	0.20625567	0.035900354	0.3063767	-0.030559301	-0.03447914	-0.05256033	-0.111665964
"33550_at"	0.07235217	0.16135216	0.2864504	-0.094888926	0.008238792	-0.094782114	-0.008238554
"33551_s_at"	0.011568069	0.38922954	-0.040138245	-0.112582445	0.072757006	0.07091284	0.004317761
"33552_at"	-0.086149454	0.002155066	0.17156124	-0.1999991	0.002522469	-0.002155066	-0.10789752
"33553_r_at"	-0.031248808	0.036473036	0.014354706	0.030673504	0.03563118	0.1471157	-0.063702345
"33554_at"	0.21842813	0.34974098	0.6866069	-0.024698019	0.12577724	0.20673466	-0.051975727
"33555_at"	0.04048395	-0.058211803	-0.084754944	-0.17056179	-0.046362877	-0.045473576	-0.10050535
"33556_at"	-0.27516556	-0.25505114	-0.062588215	-0.14901447	0.095938206	-0.026513577	0.44882965
"33557_at"	0.18852758	0.087058544	0.23528337	0.008586407	0.07659483	0.020282745	-0.19412374
"33558_at"	-0.001006603	0.1364317	0.030590534	-0.03877592	-0.04501772	-0.26212502	-0.098142624
"33559_at"	-0.09903574	0.17266893	-0.09382868	-0.17327976	-0.27762318	-0.049126625	-0.015890598
"33560_at"	0.55153036	-0.020009995	0.6813688	0.093256235	0.052446604	0.6841254	-0.07617593
"33561_at"	-0.26227427	0.43974876	-0.54541016	0.033936977	-0.15964508	0.02748251	0.006670475
"33562_g_at"	-0.5804639	0.53975725	-0.47506	0.16124725	-0.18032265	-0.020781517	0.020781517
"33563_s_at"	0.16276693	0.5727129	-0.08749533	0.16433954	0.15212011	0.3130598	-0.060115337
"33564_at"	0.005340099	0.12728906	0.19238615	0.20768881	-0.09838939	-0.20345473	-0.076259136
"33565_at"	0.025518894	-0.1483264	-0.2526493	-0.07888889	1.6579466	6.365251	6.606315
"33566_at"	0.044437885	0.021075726	0.09317112	0.09730816	-0.07319069	-0.03352785	-0.12338877
"33567_at"	0.014033794	-0.002010822	-0.07007551	-0.006169796	-0.014139652	-0.080620766	-0.05803585
"33568_at"	-0.14410591	0.023955345	-0.109609604	-0.16901207	0.001793861	-0.2168827	-0.15677261
"33569_at"	0.31610727	0.014206409	0.12074852	0.10678196	0.023225307	0.043047428	-0.3276472
"33570_at"	0.2403822	0.15731955	0.33440924	-0.009588718	-0.017508984	0.13047218	-0.04461336
"33571_at"	0.15876055	0.09891796	0.17357683	0.05853939	-0.21177435	-0.058539867	-0.14601374
"33572_at"	0.4456663	-0.64270663	-0.056336403	0.44803047	0.075014114	-0.4818306	-0.03953743
"33573_at"	0.13426256	0.08785772	0.06208515	-0.051241875	-0.06019306	-0.038104057	-0.04858303
"33574_at"	0.19809628	-0.034393072	0.06603336	0.096312046	-0.103768826	0.043085575	-0.027086496
"33575_at"	0.08398628	0.09350443	0.11122656	-0.003369808	-0.115825176	0.24437952	-0.03129673
"33576_at"	0.32167673	-0.014662266	-0.032398224	-0.2723112	0.015333653	0.09629822	-0.15420818
"33577_at"	0.015663147	-0.09703827	0.039238453	0.21492028	0.13318229	-0.037699223	-0.22226262
"33578_at"	0.0643754	0.41001654	0.038282394	0.06059599	-0.21953106	0.30856228	-0.16994572
"33579_i_at"	-0.078455925	0.17835903	0.13160229	0.12361622	-0.036362648	-0.0829258	-0.0905962
"33580_r_at"	0.1142416	0.18720722	0.28047276	0.055059433	0.005900383	-0.005900383	-0.15285492
"33581_at"	-0.07022619	0.21646023	0.1459918	0.02695322	0.2315774	0.029144764	-0.15969896
"33582_s_at"	0.011251926	0.07201862	0.023475647	0.13300228	0.061535835	0.5293989	-0.13178301
"33583_r_at"	0.18382263	0.14162922	-0.045199394	-0.008970261	0.055520058	0.016095161	-0.025586128
"33584_at"	0.025663376	0.28514433	0.089941025	0.004207611	-0.10260439	-0.054858208	-0.08694315
"33585_at"	0.007100105	-0.004569531	0.16966939	0.04371667	-0.004986763	-0.1519959	0.14382076
"33586_at"	0.009998798	-0.009998798	-0.47371626	0.13260174	-0.19279575	-0.19039059	-0.034163
"33587_f_at"	0.06617451	0.3025074	0.25226402	0.061678886	-0.022177696	-0.10481644	-0.17919922
"33588_at"	0.038183212	0.041258335	-0.13554716	-0.0639143	0.005683422	-0.12133932	0.038466454
"33589_at"	-0.058135986	0.03093052	-0.09018612	-0.04391384	-0.01966381	-0.040595055	-0.022461891
"33590_at"	0.16427279	0.02930355	0.18199587	0.056162357	-0.02930355	-0.15577936	-0.26821423
"33591_at"	0.20850325	-0.3250308	0.050414562	0.12099743	0.025975227	-0.28544474	-0.06391859
"33592_at"	0.22912645	0.004261017	0.17565918	0.13330841	0.17093849	0.020881653	-0.19567442
"33593_at"	0.1712637	0.17067862	0.108181	0.054432392	-0.020039082	-0.0207448	-0.14140892
"33594_at"	-0.018704891	0.18511772	0.01254797	-0.070010185	0.026492596	0.36636925	-0.009828568
"33595_r_at"	0.17093468	0.04817629	0.10427761	-0.17731261	-0.13797808	-0.16942215	-0.118861675
"33596_at"	-0.05582857	-0.002130032	-0.03818226	-0.031268597	0.002130032	0.09997034	-0.039311886
"33597_at"	0.16479588	0.2751479	0.008749008	0.05041313	-0.2322135	-0.28281546	-0.19252157
"33598_r_at"	-0.063102245	0.1643827	0.1532898	-0.12468648	-0.10278344	-0.059982777	-0.08786321
"33599_at"	0.04627323	0.45361042	-0.00779295	0.00779295	0.18384075	-0.011734962	-0.030674934
"335_r_at"	0.13432598	0.3506117	-0.005291939	0.044122696	-0.19219112	0.005291939	-0.2122488
"33600_at"	0.39967728	0.28886366	0.3606906	0.07171011	0.13954973	0.10447407	-0.063658714
"33601_at"	0.23075771	0.26711893	-0.006187439	0.02149105	0.00760746	-0.021159172	0.006187439
"33602_at"	0.07414055	0.09039068	0.2879567	0.015177727	0.014981747	0.09081364	-0.1343894
"33603_at"	0.007921219	0.24252748	-0.006676674	0.07130146	0.056503773	0.10380173	-0.14322901
"33604_at"	0.36872482	0.23364687	0.20382404	0.05456686	-0.116281986	-0.24608088	-0.33114767
"33605_at"	-0.12385368	0.067852974	-0.006266117	0.006266117	0.39718246	-0.027879238	0.28759956
"33606_g_at"	-0.02047205	-0.11414623	-0.23940182	-0.044625282	0.3466382	0.20797205	0.70223284
"33607_at"	0.14374971	0.415833	0.17703915	0.013557911	-0.0031147	0.0031147	-0.05121565
"33608_at"	0.045153618	0.002036572	-0.002036572	0.14068365	-0.018977642	-0.11748648	-0.17900038
"33609_at"	0.3917694	0.3560934	0.42065382	-0.004282475	0.004282475	0.21861792	-0.013110161
"33610_at"	0.5398259	0.3418026	0.45987415	0.004025936	0.14575386	0.21839094	-0.004025936
"33611_g_at"	0.05885744	-0.082346916	0.03338623	0.022018433	-0.08369446	-0.1394248	0.004354954
"33612_at"	0.002708197	0.011713982	0.10246372	-0.011102915	0.010253906	-0.002708197	-0.3248844
"33613_at"	0.007574081	0.20095491	0.05163145	-0.038472652	-0.004389763	-0.080497265	-0.13229227
"33614_at"	-0.34143543	-0.023026466	0.8235321	0.07689762	-0.21988583	0.095537186	0.07297516
"33615_at"	-0.07414675	-0.011985302	-0.037896156	-0.09080505	-0.09375429	0.011985302	-0.11249876
"33616_at"	-0.093515396	0.116521835	-0.24669552	-0.01785326	0.178823	-0.048939705	0.006463051
"33617_s_at"	0.12765694	0.21486521	0.017359257	0.14028358	-0.017359257	-0.15413666	-0.10531807
"33618_at"	-0.07752085	0.058734417	-0.004491806	-0.064008236	0.07546711	-0.4072175	-0.11365414
"33619_at"	-0.13354778	-0.04662037	-0.27988148	0.060926437	0.4211111	0.020438194	-0.015597343
"33620_at"	0.1001606	0.10760307	0.23963976	0.04477024	0.015034199	0.0800457	-0.15612793
"33621_at"	0.3593259	0.18931532	0.19504356	0.04609108	0.24421835	0.3806839	-0.056721687
"33622_at"	-0.013612747	0.2271328	-0.030690193	0.017029762	0.013612747	-0.099491596	-0.107860565
"33623_g_at"	0.18662119	0.15869284	0.22136879	0.10709858	0.16935778	0.2681198	-0.29129505
"33624_at"	0.11840534	0.20893669	0.07948542	0.012081146	0.2698245	0.10652828	-0.35689783
"33625_g_at"	0.01461935	0.09460068	0.16355228	0.096785545	-0.2151432	-0.03031826	-0.1626811
"33626_at"	0.16502666	0.2561183	0.030012608	0.15080309	0.0529356	-0.08015156	-0.2852111
"33627_at"	0.2758417	0.17104912	0.24642372	0.042108536	0.17523193	0.11396217	-0.14590359
"33628_g_at"	0.34729195	0.56801987	0.6707792	0.08887863	0.22628069	0.5761852	-0.08887863
"33629_at"	0.21289253	0.092999935	-0.019364834	0.028195858	0.06500578	-0.030884743	-0.095787525
"33630_s_at"	0.36626005	-0.074989796	0.059051037	0.043375015	0.12867069	0.5307803	-0.084421635
"33631_at"	-0.004017353	-0.12435293	-0.14196444	0.22815299	-0.11288357	0.1653893	0.3091905
"33632_g_at"	-0.19865942	-0.40336847	-0.13549328	0.2077837	0.03974819	0.38113976	0.13510561
"33633_at"	0.05673504	0.30638695	0.05474186	-0.004706383	-0.17122841	-0.18958282	-0.28476906
"33634_at"	0.043338776	0.1798191	0.05631113	0.03909254	-0.15699625	-0.09780216	-0.06465006
"33635_at"	0.019094944	0.05637312	-0.09066939	-0.045056105	-0.038849354	0.03266859	-0.0692122
"33636_at"	0.018494606	0.13982677	0.066563606	0.16970634	0.03597641	0.0924449	-0.21361542
"33637_g_at"	0.077674866	0.23302078	-0.007144928	0.025987625	-0.10065079	-0.12817097	-0.09056091
"33638_at"	0.23902464	0.2592492	0.050595284	-0.023966312	0.071902275	0.020729065	-0.020729065
"33639_g_at"	0.39779806	0.3010912	0.4492736	0.1734519	0.08592367	0.14632225	-0.09703541
"33640_at"	0.06515169	-0.114963055	0.05989933	-0.08228111	-0.047377586	-0.10604668	-0.050898075
"33641_g_at"	0.24862099	0.038565636	0.31266403	-0.041777134	0.13129759	0.3567009	-0.14642096
"33642_s_at"	0.28924227	0.047738552	0.2768588	-0.047738552	0.094142914	0.17280388	-0.18995094
"33643_at"	0.18998528	0.046362877	0.055466652	-0.060528755	0.048002243	-0.19313431	-0.20812607
"33644_at"	0.3631301	-0.004981041	-0.07900047	-0.057238102	-0.013092518	-0.02604723	0.11351061
"33645_at"	-0.08889055	0.18774462	0.092265606	0.009597778	0.08754206	-0.043985367	-0.07710838
"33646_g_at"	-0.015330792	0.16723108	-0.12161207	0.023563385	-0.016225815	0.012093544	-0.07385683
"33647_s_at"	-0.002621651	-0.028904915	-0.1628685	0.15912056	-0.24620914	-0.20426083	0.14204502
"33648_at"	0.14064598	0.12632322	0.03880596	0.11303568	0.023693085	0.001375198	-0.2587433
"33649_at"	-0.068719864	0.10707545	0.50671077	0.14621305	-0.002699137	0.006014347	-0.1568532
"33650_at"	0.5708413	0.31257534	0.13526869	-0.09724283	-0.020792484	0.097117424	-0.10903978
"33651_at"	-0.050154686	-0.26845694	0.23406029	0.01648426	-0.046818733	-0.11028385	-0.14162636
"33652_at"	0.20912695	0.09428215	0.037488937	0.024435997	-0.017447948	0.017447948	-0.11749029
"33653_at"	0.027795315	0.05909586	0.0731287	-0.003023624	-0.14514112	0.03431034	-0.06408405
"33654_at"	-0.020356178	0.27291203	0.012402058	0.01935339	0.124340534	0.10619879	-0.05974102
"33655_f_at"	0.058669567	-0.055493355	0.020098686	-0.082265854	0.24795294	0.07139158	-0.11427069
"33656_at"	-0.51762295	-0.00875473	-0.020186424	-0.42975903	0.14644337	0.00875473	0.05542469
"33657_at"	-0.50256634	-0.5029745	0.003642082	-0.27502918	0.09233856	0.016677856	0.15052414
"33658_at"	-0.21026301	-0.13799381	-0.031332016	-0.107330084	0.057219982	0.011505604	-0.0198102
"33659_at"	0.3293543	0.20422268	-0.53451824	0.13326836	-0.2370348	-0.03720379	0.022328377
"33660_at"	-0.7524309	-0.8956146	-0.10868549	-0.026392937	0.46250534	0.12548637	0.26954556
"33661_at"	-0.15250921	-0.18285656	-0.038587093	0.038587093	-0.2572055	-0.96586514	0.18643188
"33662_at"	-0.003433704	0.003433466	-0.1422801	0.020348072	-0.03685403	0.033055544	-0.020501614
"33663_at"	0.18248844	0.09921169	0.083464146	-0.12302971	-0.09006548	0.018291473	0.045326233
"33664_g_at"	-0.20330048	-0.031773567	-0.079149246	-0.050892115	-0.200418	-0.071994305	0.12070632
"33665_s_at"	0.32660723	0.004827976	0.19466877	0.003401279	0.055410862	0.16131115	-0.113666534
"33666_at"	-0.2831192	-0.40207767	-0.7293496	0.023452759	0.18197155	-0.12982082	0.2145853
"33667_at"	-0.002645493	0.62395763	-0.114313126	0.274992	-0.12096596	0.03212738	-0.16608334
"33668_at"	-0.3476038	-0.20415974	0.7604351	0.44358826	0.095495224	0.2296772	-0.095495224
"33669_at"	0.022745848	0.19512343	-0.101032495	0.17504191	0.054779768	0.18483329	-0.07255483
"33670_at"	0.025875568	-0.059223175	0.011058331	-0.002474785	0.014996052	-0.06252003	-0.16170168
"33671_f_at"	0.1894784	0.02391386	-0.09258366	-0.06037426	0.41877556	-0.080755234	-0.0650053
"33672_f_at"	0.08340597	0.11671877	-0.060976982	0.076189995	-0.02779913	0.33684778	-0.055573463
"33673_r_at"	-0.020400047	0.17159748	0.15319777	-9.99E-04	0.022393703	-0.07024717	0.008076668
"33674_at"	-0.246027	-0.40968895	0.15430355	-0.08198547	-0.027252197	0.30895615	0.18379211
"33675_at"	0.42061043	0.36826515	0.20541382	0.16122627	-0.013646603	0.25616074	-0.03919649
"33676_at"	-0.24401665	-0.49992466	0.34377956	0.005111694	-0.005111694	-0.07263756	0.019013405
"33677_at"	-0.58081913	-0.3956051	-0.07496357	-0.21132088	0.12185669	0.08024788	0.13010311
"33678_i_at"	0.5731554	-0.43451405	-0.9758072	-0.36745358	0.30534744	0.159935	0.72265434
"33679_f_at"	0.3388338	-0.5195093	-0.28014946	0.053030968	0.036147118	-0.061890602	0.40726852
"33680_f_at"	0.078119755	-0.10126114	-0.19349146	0.08798218	0.1207881	-0.30775595	-0.024086952
"33681_at"	0.3108735	0.44070435	0.42331696	-0.001808167	-0.13610077	0.001808167	-0.09700155
"33682_at"	0.0634079	-0.063540936	0.013384819	-0.013384819	-0.06351709	-0.11686897	-0.024984837
"33683_at"	-0.43321657	-0.6194291	-0.034346104	0.04527092	-0.18010712	-0.22353792	0.24897957
"33684_at"	0.004290581	0.26391363	-0.117720604	0.00364399	0.007905006	-0.021584034	-0.2071991
"33685_at"	0.15359497	-0.17276573	0.16138744	0.19095325	-0.13395786	-0.24275017	-0.19050503
"33686_at"	0.25509644	0.15484428	0.26430416	0.102356434	-0.14373636	-0.068194866	-0.13114786
"33687_at"	-0.33219767	-0.1630907	0.29422188	-0.07237291	-0.04195404	-0.07720137	-0.11277914
"33688_at"	0.20537043	0.36406422	0.30421448	-0.07158756	0.031696796	0.16445827	-0.003060341
"33689_s_at"	0.2621317	-0.14468622	0.06865454	-0.22158861	0.29390097	0.51988125	0.13115263
"33690_at"	-0.19846106	-0.0669961	-0.31536198	-0.1947341	-0.12503815	-0.24194479	0.6635022
"33691_at"	0.007030249	0.07571149	-0.07580757	-0.007030249	0.021996498	0.14693546	0.028642416
"33692_at"	0.14105844	0.047242165	0.1385746	0.10934353	-0.0325222	-0.09015751	-0.018191338
"33693_at"	0.06619549	0.1849432	0.08300161	-0.0692749	-0.07233	-0.20472479	-0.14330626
"33694_at"	-6.35E-04	0.16932964	0.20043135	0.08762169	6.34E-04	-0.06272793	-0.19813967
"33695_at"	1.084115	0.16039658	0.09426594	0.005906582	-0.04284382	0.010941029	-0.005906582
"33696_at"	0.4304123	0.201828	-0.12205839	0.08283806	0.18973875	0.21840668	-0.1735425
"33697_at"	-0.002561092	0.10101032	0.17323446	0.13602781	-0.06712055	0.11031532	-0.06149912
"33698_at"	0.07264328	0.21278763	0.10218239	0.10240841	0.014698029	0.097782135	-0.1488018
"33699_at"	0.12411833	0.006308079	0.085063934	0.0761137	-0.08275938	-0.006307602	-0.18971491
"336_at"	8.25E-04	0.116825104	-0.3881154	-0.01869297	-8.26E-04	0.016085148	-0.020339012
"33700_at"	0.44054937	-0.08465052	0.5980058	-0.25448656	0.013553619	-0.07287073	0.17548656
"33701_at"	-0.051561117	-0.11904478	0.26359987	0.082962036	-0.1952753	0.051561117	0.09997988
"33702_f_at"	0.94861364	-0.8686619	-0.013902187	-1.6040983	0.82879305	0.24415159	-0.53977346
"33703_f_at"	1.137949	-1.2108412	0.032618523	-1.4480247	0.6480031	-0.032618046	-0.38990116
"33704_at"	0.41938066	0.41749954	0.3107376	0.016338348	0.10270786	0.16037035	-0.102265835
"33705_at"	-0.48791122	1.147716	0.55584335	0.72563696	-0.19800234	-0.33544493	0.06881189
"33706_at"	0.19985104	0.21976423	-0.2221694	0.21126747	-0.034337044	-0.002148151	-0.10192585
"33707_at"	0.30101728	0.85225344	0.2590642	-0.19558287	0.055943966	-0.10423231	-0.2609396
"33708_at"	-0.042324066	-0.076374054	0.06165266	0.14768791	-0.05437708	0.038253784	-0.038253784
"33709_at"	0.006691933	-0.039553165	-0.13555288	0.08594942	0.5884352	0.18709755	0.06897402
"33710_at"	-0.7816396	-0.7962656	-1.1238503	0.76503706	0.25483704	-0.36673832	0.5636897
"33711_at"	0.056209564	-0.05621004	-0.29131126	-0.19344139	5.6618614	6.2531395	6.1518583
"33712_at"	-0.001987457	-0.059806824	-0.30324078	-0.38695335	0.019874573	-0.31799412	0.076963425
"33713_at"	0.23628521	0.008840561	-0.045747757	-7.61E-04	0.044133186	0.27908516	-0.030882835
"33714_at"	0.01278162	0.1915574	-0.057962894	0.005340099	-0.005340099	0.2955289	0.073774815
"33715_r_at"	-0.09176111	-0.044626236	0.013614655	-0.12160516	-0.020654202	0.12556386	0.19407582
"33716_at"	-0.30144882	-0.51493645	0.6475191	-0.11930752	-0.25164127	0.09283209	-0.016246796
"33717_at"	0.31032562	0.18947077	0.36984682	0.15798712	-0.31217623	0.014155865	-0.014155865
"33718_at"	0.49056292	0.38329458	0.07700729	0.007490158	-0.010703564	0.22033167	-0.08283377
"33719_at"	-0.15803242	0.041866302	-0.17745686	-0.13676071	-0.029358864	-0.12944889	0.036691666
"33720_at"	0.010258675	-0.041623116	-0.17930555	-0.010258675	0.10229778	-0.088973045	0.07075453
"33721_at"	-0.014021635	-0.13105083	0.11763859	-0.09397602	-0.018794298	-0.10400295	0.06035161
"33722_at"	0.00755167	-0.00755167	0.05250311	0.18426895	-0.09312916	-0.15521336	-0.026974201
"33723_at"	-0.593472	-0.07010269	-0.09496403	0.10128212	-0.38439608	-0.26673937	0.007004261
"33724_at"	0.16022587	0.17110252	-0.03537512	0.014279366	0.014490128	-0.00962925	-0.085128784
"33725_at"	0.29566002	0.05933237	0.13166857	0.16582346	-0.08999634	0.114631176	-0.1763854
"33726_at"	0.028867245	0.02133751	0.15375376	0.04826355	0.10344839	-0.072707176	-0.14438152
"33727_r_at"	0.27756977	0.3309431	0.23478222	0.012550354	-0.012550354	0.11589146	0.019288063
"33728_at"	0.19187784	-0.11702824	-0.062737465	0.14676952	-0.037011147	0.06331587	-0.07084465
"33729_at"	0.17601919	-0.078332424	0.041019917	-0.026659489	-0.06373978	0.01779461	0.30440092
"33730_at"	0.05094862	0.2104888	0.003204346	-0.001219273	0.12169123	0.0324378	-0.1894598
"33731_at"	0.15456247	0.120262146	-0.16548777	0.02494526	-0.003356457	-0.04297638	-0.030665874
"33732_at"	0.1677618	0.24783897	0.23441887	0.1527214	0.059161186	0.21327877	-0.14811945
"33733_at"	0.524364	-0.17300558	-0.48303127	0.19472551	-0.14222765	-0.17026758	0.18690634
"33734_at"	-0.15336657	-0.062162876	0.15938902	-0.055655956	-0.23305821	-0.056688786	-2.84E-04
"33735_at"	-0.029223919	0.23618507	0.26209784	-0.04627657	0.07680178	0.47478867	-0.022241592
"33736_at"	-0.2308054	0.3015957	-0.00347805	-0.14563036	0.08178663	0.29284048	-0.020300388
"33737_f_at"	-0.3547573	-0.3703184	-0.019004345	-0.112891674	-0.160038	-0.16504192	0.1675458
"33738_r_at"	0.2962141	0.23050499	0.37316608	0.089251995	0.08907747	0.21237946	-0.187356
"33739_at"	-0.006528378	0.26376724	0.05772543	0.049536705	-0.15852356	-0.14924002	-0.0635829
"33740_at"	0.26297855	0.04589939	0.1889267	0.13886833	0.045288086	-0.13537121	-0.09554958
"33741_at"	0.13459015	-0.13802099	-0.04699135	0.20645046	0.026215553	-0.033138752	-0.04330015
"33742_f_at"	0.3512292	0.88400173	0.7166443	0.006979466	0.495584	0.45099354	-0.054976463
"33743_at"	0.061080933	-0.01816988	0.025059223	-0.054377556	-0.037068844	0.065737724	-0.028429031
"33744_at"	0.11731386	0.13847828	0.09589577	0.017904282	-0.017904282	0.16135502	-0.043628216
"33745_at"	0.13263798	0.30746078	-0.023851395	-0.033517838	0.048143387	0.034963608	-0.09870052
"33746_at"	0.3985672	-0.2050271	-0.13551712	-0.07955074	0.033623695	-0.02124691	0.22709942
"33747_s_at"	-0.06840134	0.002166271	-0.36182117	-0.05157566	0.03847933	0.14731503	-0.0972023
"33748_at"	0.46785402	0.33318996	0.37756824	-0.013971329	0.12680387	0.32312775	-0.027414799
"33749_at"	-0.1427803	-0.08759928	0.063920975	-0.08822632	-0.122148514	0.17148638	0.20647383
"33750_at"	0.42986584	0.13582897	0.29533482	0.026090622	-0.05081749	-0.21369648	-0.054460526
"33751_at"	0.07151079	0.03572178	0.4379735	-0.070672035	-0.050506115	0.001956463	-0.11396599
"33752_at"	0.14145803	-0.15466356	-0.4608822	0.1723051	0.06440973	-0.5509224	0.021481514
"33753_at"	0.041139603	0.39617586	-0.9212718	0.007351875	-0.13849449	0.21018839	-0.10722351
"33754_at"	-0.03904295	0.049667835	-0.31841135	-0.16905451	0.11748648	-0.34595728	0.08427143
"33755_at"	0.030550003	-0.14219332	0.39706087	0.15842152	0.16650915	-0.3243146	-0.072423935
"33756_at"	0.1148777	0.09386301	-0.052470207	0.2567377	-0.060057163	-0.23877239	-0.004858971
"33757_f_at"	0.051743984	0.29563856	-0.1526475	-0.14700699	9.42E-04	-0.18650913	0.036762238
"33758_f_at"	0.13542795	0.2211008	-0.03338051	-0.13936996	0.007909775	-0.17941475	0.21112823
"33759_at"	-0.4694395	0.109111786	0.14826441	0.022515774	-0.25916004	-0.12947941	0.08622408
"33760_at"	0.26567745	-0.009383202	0.0662384	0.001617432	-0.07606077	0.034159184	-0.03591442
"33761_s_at"	-0.27116537	-0.24566698	0.00438118	0.12882757	-0.06617832	-0.5837951	0.28818655
"33762_r_at"	0.002660751	0.024332047	0.07775545	-0.06328106	0.12903547	0.2505164	0.00469923
"33763_at"	-0.07783604	0.034530163	0.07994509	0.08945894	-0.055398464	-0.24564552	-0.13260603
"33764_at"	9.52E-04	0.7979765	0.40957737	0.019361496	-9.52E-04	-0.27731323	-0.23485899
"33765_at"	0.09484053	0.06331062	0.02149868	0.034650803	-0.08386564	0.1093359	-0.09036636
"33766_at"	0.11515522	0.14965487	0.14075184	0.23149967	0.016534328	-0.1375184	-0.19314575
"33767_at"	0.23414946	-1.2148337	-0.6280508	-1.2384291	0.19587183	0.76093006	0.27101088
"33768_at"	0.048602104	0.2217884	0.07932186	0.14659786	-0.3226986	-0.13981247	-0.26137924
"33769_at"	-0.05751133	-0.026924133	0.03581381	-0.15947008	0.03700733	-0.33940363	0.026924133
"33770_at"	0.44237518	0.012779236	-0.030397415	-0.14520168	0.03247261	0.6128521	0.06223297
"33771_at"	0.002367497	-0.008268356	0.030657291	-0.06686306	-0.002367497	-0.10328627	-0.20360613
"33772_at"	0.105864525	0.1416235	0.075550556	0.14613485	0.13586807	-0.009484768	-0.12754965
"33773_at"	-0.062886	-0.040728092	0.24269462	0.036438227	-0.03643799	0.060070038	-0.10816932
"33774_at"	0.35454178	0.39577293	0.5677166	-0.14438057	0.13793945	0.20475101	0.01688385
"33775_s_at"	0.24750042	0.13838005	0.37019682	-0.00214529	0.18219662	0.3478217	0.00214529
"33776_at"	-0.18342352	-0.40328884	-0.22375774	-0.23028278	0.24527216	0.09510565	0.49084616
"33777_at"	0.04821062	0.08085394	0.011480331	0.052769184	-0.10103655	-0.076584816	-0.17298937
"33778_at"	-0.23770332	-0.11556244	-0.18759489	0.06630516	-0.03393078	-0.11338997	0.10809708
"33779_at"	0.14307499	0.09352684	-0.12918377	-0.023685455	-0.08391094	-0.22112942	-0.1692524
"33780_at"	-0.17766953	0.019662857	-0.2394576	-0.015388489	0.015388489	0.49052954	-0.36393976
"33781_s_at"	0.08136845	0.051711082	0.47516012	-0.09456396	-0.16539907	-0.14590311	0.032583237
"33782_r_at"	0.16502953	0.21151829	0.17648125	-0.1649046	-0.081624985	0.027534485	0.030558586
"33783_at"	0.058525085	-0.12709332	8.73E-04	-0.08086777	0.3710451	0.28809357	0.028248787
"33784_at"	0.018928528	0.13871574	0.08795357	0.6237993	0.07085037	-0.08813858	-0.26467848
"33785_at"	0.37373543	0.14997005	-0.241889	0.1010828	-0.027685165	-0.25487232	-0.11558342
"33786_r_at"	0.008753777	0.22302699	0.13330793	-0.008754015	0.04208517	0.0813694	-0.028295279
"33787_at"	-0.11459303	-0.07933426	0.33139515	-0.17113543	-0.17806768	-0.23214245	0.1482563
"33788_at"	0.09635162	-0.58400106	0.3435645	1.072351	-0.24375772	-0.22157621	-0.13425255
"33789_at"	-0.17523193	-0.28068924	0.18449116	0.10851097	0.06960392	-0.39722157	-0.11109924
"33790_at"	0.5729866	-0.2801876	-0.03991413	-0.060328484	0.027010918	0.15712881	0.085519314
"33791_at"	-0.07958603	-0.40127134	-0.2739644	-0.21485424	0.9781852	1.0027766	0.5605774
"33792_at"	0.26027346	0.2696042	-0.003708363	0.20561457	0.06875801	-0.07663059	-0.14461803
"33793_at"	0.23966217	-0.073843956	0.13846922	0.33995676	-0.040699005	0.026874065	-0.083684444
"33794_g_at"	0.063779354	0.004592419	-0.004592419	0.04563713	-0.3657856	-0.17435789	-0.30514526
"33795_at"	0.16255951	0.04963684	0.07396889	0.06044388	-0.07293606	0.016701698	-0.016701698
"33796_at"	-0.1974659	-0.091210365	-0.11822224	-0.14130116	-0.04120779	-0.080545425	0.106398106
"33797_at"	-0.32738018	0.16648483	-0.096019745	-0.002892971	0.118056774	0.2292552	0.04410267
"33798_at"	0.25114155	0.25259972	0.5343008	0.08211517	0.19975376	0.25482464	-0.048322678
"33799_at"	0.16802502	-0.22956038	-0.1472354	0.012956142	-0.32073545	-0.51390314	-0.060163498
"337_at"	0.020994663	-0.05199337	0.08378744	0.1092329	-0.28539562	0.11924744	-0.15769911
"33800_at"	-0.65979004	-0.002993107	0.1802907	-0.20049953	0.1383729	-0.20460463	0.30509663
"33801_at"	0.24239826	0.2212286	0.02727127	-0.06423855	-0.086354256	0.10573101	-0.027403831
"33802_at"	0.21700048	0.27531338	0.026505947	-0.016133308	0.36145496	0.019599915	-0.27138758
"33803_at"	-0.08228397	-0.10309315	-0.53814554	-0.39057446	0.37673712	0.09136629	0.93373585
"33804_at"	0.035092354	0.0503726	-0.15443563	-0.03895521	0.2523718	0.02294588	-0.025647163
"33805_at"	-0.6352434	-0.24071217	-0.7834549	-0.41655684	0.23958874	0.3565936	0.47636747
"33806_at"	0.09344387	0.045544624	0.106669426	0.007127762	-0.11183548	-0.13982153	0.040099144
"33807_at"	-0.25308132	0.26386547	-0.13958836	0.19421482	-0.13758469	-0.17458534	-0.04227829
"33808_at"	0.17579937	0.12178135	-0.021058083	0.03490448	0.14083862	-0.14096546	-0.14359093
"33809_at"	-0.40842342	-0.26195383	-0.030693054	1.510706	-0.35586214	-0.45648575	0.082811356
"33810_at"	-0.42912817	-0.38770103	0.061474323	-0.060225487	-0.13999224	0.009429455	0.09591532
"33811_at"	-0.68097925	-0.06015539	0.56026936	0.06015539	-0.37448215	-0.45073748	0.17065907
"33812_at"	-0.1841178	0.021959305	-0.21907187	-0.2402029	-0.06565285	0.30980778	0.10958624
"33813_at"	0.1254034	0.204319	-0.027218819	-0.09785652	0.2636547	-0.0289011	-0.003240585
"33814_at"	0.02262783	-0.06653023	0.0981617	0.08332825	-0.010451317	0.019304276	-0.046539307
"33815_at"	-0.11970949	-0.06220579	0.001327038	0.21258163	-0.046829224	0.4688177	0.007621765
"33816_at"	0.4353466	0.28572273	0.2268629	-0.05906105	-0.03725195	0.029584408	-0.05567646
"33817_at"	-0.017601967	-0.69946575	-0.15899229	-0.17496729	-0.040192604	0.025233746	0.33452797
"33818_at"	0.040251732	0.20429802	0.18757725	0.67071056	-0.10120487	-0.24948883	-0.14132404
"33819_at"	0.29816532	-0.019491196	-1.0476599	-0.3638506	-0.09159565	0.24903011	0.18994331
"33820_g_at"	-0.12021732	0.028826714	-0.43587303	0.28800678	-0.3266821	0.20479679	-0.22661972
"33821_at"	-0.44268608	0.15026808	-0.49382305	0.3538866	-0.3049121	-0.59006596	0.41770267
"33822_at"	0.09336662	0.076488495	-0.08256817	0.4245968	-0.1267395	-0.107364655	-0.016410828
"33823_at"	0.05667019	0.20126009	0.2587843	-0.27408886	0.05095768	-0.018568039	0.017485619
"33824_at"	-0.15683937	0.017451286	-0.20960617	-0.29402828	0.16919899	0.7452154	0.48133373
"33825_at"	0.058555603	0.06435537	-0.23468113	-0.05855608	2.8525562	0.23999643	0.37715054
"33826_at"	0.015899181	0.06816435	0.2981658	0.25022793	-0.26223326	0.11172247	-0.25177526
"33827_at"	0.2513504	-0.4978485	-0.24730015	0.031694412	0.11251259	-0.4357152	0.26619053
"33828_at"	0.21326065	-0.21016312	0.07196283	0.24816608	-0.048817158	0.31737518	-0.017314434
"33829_at"	-0.38368177	-0.24478436	-0.5185671	-0.24644756	0.19530535	0.1380043	0.1512332
"33830_at"	-0.06780243	-0.6241498	-0.65806484	-0.084813595	0.2622285	-0.049034595	0.6131573
"33831_at"	-0.18139267	-0.14904308	-0.35601997	-0.05344248	-0.09433842	-0.39800453	0.05344248
"33832_at"	0.049910545	0.20863628	0.021339893	0.06973171	-0.026686192	0.0730834	-0.31472874
"33833_at"	0.6598244	0.08054733	-0.10437012	0.10010624	-0.27704716	-0.20950317	-0.03468895
"33834_at"	0.42135572	-0.09786177	-0.16931534	0.13303232	-0.039763927	-0.08255291	-0.34201527
"33835_at"	-0.63491964	-1.1616554	-0.43617725	-0.03938198	-0.56411076	-0.18255234	0.6148815
"33836_at"	-0.026158333	0.07184696	0.16329765	0.2927189	-0.15645313	-0.19070816	-0.24070168
"33837_at"	-0.0632081	-0.46847916	-0.14990425	-0.16632128	-0.052057743	-0.14133263	0.12194538
"33838_at"	0.18489647	0.069877625	0.42759705	-0.047358513	-0.2504015	-0.13767433	-0.08532524
"33839_at"	-0.002644062	0.017169476	-0.08237696	0.026132107	0.09524202	-0.10186911	-0.03175068
"33840_at"	-0.2513442	-0.3427844	-0.02932024	0.13663626	0.011067867	-0.3068447	0.08505678
"33841_at"	-0.08470917	0.64921665	0.05744362	0.47305775	-0.028765678	-0.01966858	-0.15972042
"33842_at"	0.015842915	0.186512	0.15087986	0.2106185	0.027460575	-0.117688656	-0.2163868
"33843_g_at"	0.09585285	0.2526369	0.04397583	0.20245266	-0.081700325	-0.13132572	-0.0693388
"33844_at"	-0.04726267	-0.13743687	-0.27909517	0.081291676	-0.09404659	-0.17776346	0.049848557
"33845_at"	-1.0924997	-0.4439497	-0.5543604	0.066467285	0.35847282	-0.97771025	0.37840462
"33846_at"	0.11525011	0.24511147	0.34278393	0.044710636	0.019723892	0.073102474	-0.20418835
"33847_s_at"	-0.6069603	-0.73854923	-0.6080251	0.12128496	0.15332031	0.118141174	0.011920929
"33848_r_at"	-0.24022698	-0.15842152	0.056213856	0.13528919	0.21984315	-0.006759644	0.006759405
"33849_at"	-0.04373932	-0.46111155	-0.31604862	0.024968624	0.11454153	-0.63913155	1.1333675
"33850_at"	0.3112316	0.20616627	0.581151	0.2698679	-0.078959465	0.19477749	-0.17520142
"33851_at"	0.30989075	0.3670187	0.49078083	0.04372406	0.07363844	0.17069864	-0.07626486
"33852_at"	-0.56529856	-0.12763882	-0.46520424	0.07821369	-0.08161688	-0.1652813	0.112455845
"33853_s_at"	0.20632935	0.2646699	0.06451368	0.037522793	0.18327951	0.1581459	-0.10941076
"33854_at"	-0.17448854	0.34800005	-0.2557106	0.16145325	-0.22281456	0.018224716	-0.07801199
"33855_at"	-0.04955387	-0.62814	-0.30106544	0.04955387	-0.52052593	-0.40876722	0.23530197
"33856_at"	-0.12998676	-0.34591866	-0.007078171	-0.4825201	-0.4074087	0.20479393	0.28124142
"33857_at"	0.032156944	-0.14989567	0.3632722	-0.09251261	0.00128746	-0.00128746	-0.07310438
"33858_at"	-0.086057186	0.16072369	0.16617823	0.07307625	-0.13826942	-0.12908316	-0.042683125
"33859_at"	-0.261858	-1.2696028	-0.4863701	-0.26758862	0.036942482	-0.036942482	0.59440994
"33860_at"	0.087454796	3.02E-04	-3.02E-04	-0.09600735	0.033345222	-0.12291908	-0.043478966
"33861_at"	0.052509785	-0.49363518	-0.2896428	0.3502159	0.097558975	-0.115795135	0.20046806
"33862_at"	-0.027057648	-0.07983017	-0.22293758	-0.094792366	0.07344341	0.027057648	0.25175953
"33863_at"	-0.04271698	-0.29835796	-0.31155872	-0.1422863	-0.027814865	0.19296074	0.33053493
"33864_at"	0.04904318	-0.17750168	0.029761314	0.06188059	-0.14013863	-0.24367237	-0.029761314
"33865_at"	-0.62320185	-1.1767769	-0.41931105	0.2288003	-0.4138627	-0.49228096	0.22912169
"33866_at"	-0.1593504	0.13188028	-0.11206484	-1.0237503	-0.1575656	-0.6612377	0.3668418
"33867_s_at"	-0.47695732	-0.07580423	-1.1962624	-0.6581454	0.38140917	0.04747343	0.13590193
"33868_at"	0.009943962	0.011487961	0.28422737	0.16151953	-0.009943485	-0.026086807	-0.27542496
"33869_at"	-0.13551903	-0.18642855	0.12770176	-0.07834482	0.23262691	0.29990292	0.20146465
"33870_at"	-0.17417002	0.049574852	-0.17842007	-0.049574852	0.1149025	0.27877474	0.05136347
"33871_s_at"	0.076609135	-0.124595165	0.09265137	-0.020534515	0.051253796	-0.011117458	-0.02655983
"33872_at"	-0.15408087	0.001137734	-0.047819614	0.190732	0.20072746	-0.021926403	0.06658125
"33873_at"	-0.08145809	-0.16291142	-0.28557634	-0.10178661	0.029127121	-0.05074787	-0.016382217
"33874_at"	0.30515242	0.41883945	0.030404568	0.27198172	-0.30871725	-0.37054825	-0.22427082
"33875_at"	-0.32513714	-0.12560081	-0.6019211	-0.7312083	0.18365574	-0.029783249	0.39173412
"33876_at"	0.11261988	-1.0435362	-1.2698107	-0.06763506	1.3133783	-0.3541994	0.5467348
"33877_s_at"	-0.550787	-0.74482536	-0.293406	0.18182182	-0.24611568	-0.45730686	0.042809486
"33878_at"	-0.036179066	0.036179066	-0.039988518	0.101204395	-0.15500021	-0.25959396	0.06960821
"33879_at"	-0.038139343	0.24629354	-0.110692024	0.005122662	-0.0872941	0.06503105	-0.11669159
"33880_at"	-0.044727325	-0.28273702	-0.37348723	0.18884659	-0.29342556	0.044727325	-0.19014978
"33881_at"	0.21193981	-0.2647953	-0.23420525	0.19041348	-0.362576	0.079298496	-0.16069794
"33882_at"	0.28597355	0.16418839	0.19248867	0.09655094	0.041332245	0.1260519	-0.09544563
"33883_at"	0.09451294	-4.43E-04	0.3279233	0.21775532	0.48885775	0.23462391	4.43E-04
"33884_s_at"	-0.010442734	0.010442734	0.06459427	0.20755672	-0.15769005	0.03141117	-0.2951908
"33885_at"	-0.19159746	-0.20963573	0.056396008	-0.27354717	0.33468246	-0.07844305	0.22209597
"33886_at"	-0.09860444	-0.2975247	-0.04998231	-0.12056422	0.042715788	0.09748316	0.345335
"33887_at"	0.07832909	-0.009813309	0.025946617	0.023284912	0.009813309	-0.084682465	-0.15698719
"33888_at"	-0.001163483	0.14696121	0.33282375	-0.021939278	0.14572811	0.19845295	-0.017370224
"33889_s_at"	0.16347027	0.005966187	-0.005966187	0.06206894	0.18274212	0.03442478	-0.17499542
"33890_at"	0.1606369	-0.16063738	0.5186653	2.439537	-0.8779855	-0.77932787	-0.6799941
"33891_at"	0.40563107	0.3312049	-0.106927395	-0.22941685	0.424232	0.014232636	0.38526964
"33892_at"	-0.2469821	0.51395893	-0.28433752	0.21815157	-0.27095795	-0.43970442	0.08750248
"33893_r_at"	0.050931454	-0.27389097	-0.43647337	-0.16105509	-0.12992859	-0.050931454	0.43052673
"33894_at"	-0.053434134	0.015352488	0.15032578	-0.018083334	0.12811089	-0.0626905	-0.068811655
"33895_at"	-0.48951674	-0.19152832	-0.3675518	-0.059154034	0.33501768	0.30629873	0.5866027
"33896_at"	2.94E-04	-0.02674675	0.123541355	-0.009634972	-0.11521244	0.08593798	0.0778718
"33897_at"	0.013823509	0.10384655	-0.2014265	-0.02036333	-0.14271116	-0.13157415	-0.31934786
"33898_at"	0.029370785	0.07083893	0.10238838	0.33285618	0.002520084	0.06039238	-0.16669655
"33899_at"	-0.021544456	-0.6770072	-0.88219976	-0.08944988	-0.002161026	0.27141666	0.49707508
"338_at"	0.04339981	0.3157339	0.025565147	0.101947784	-0.09256363	-0.17811108	-0.081866264
"33900_at"	0.17496872	0.28104353	-0.08209658	0.007041931	0.104478836	0.059812546	-0.1699543
"33901_at"	-0.48475933	-0.1477747	-0.25847912	0.83143044	0.07101917	0.41702843	-0.003687859
"33902_at"	-0.08083868	0.25957775	0.012302399	0.030757427	0.002988339	0.02693367	-0.2460661
"33903_at"	0.05980587	0.89145947	0.2074976	-0.087340355	0.003120422	0.050426483	-0.15930843
"33904_at"	-0.764174	-0.31227827	-0.5507107	0.086080074	0.50825405	0.5444751	0.34648132
"33905_at"	-0.08720827	0.9415965	0.16394567	0.20426083	0.08534384	-0.049583435	-0.08298111
"33906_at"	-0.1662817	0.4245596	-0.190835	-0.17829275	0.1628604	0.15333366	0.14282274
"33907_at"	0.49669838	-0.6179333	-0.32568455	-0.07486582	-0.24095297	-0.0604887	0.4712801
"33908_at"	0.2885809	0.14263535	-0.7563176	0.21720028	0.23398876	0.19408321	-0.013965607
"33909_at"	0.17760086	0.036369324	-0.010540009	0.12531662	-0.06999779	-0.21667528	0.058888435
"33910_at"	-0.23708797	-0.2761209	-0.3255291	0.270715	-0.028145313	0.10367322	0.11730933
"33911_at"	0.12316561	-0.007814884	-0.025753498	0.22785282	0.007814884	-0.27167654	-0.10149622
"33912_at"	-0.230618	0.015909195	-0.25749922	-0.35192633	-0.34536648	-0.015909672	0.085876465
"33913_at"	0.476058	0.09095955	0.32399845	0.15731144	-0.24058723	-0.09872627	-0.22010422
"33914_r_at"	0.10230684	0.16672754	0.10919857	-0.021539211	0.25736523	-0.15710306	-0.123360634
"33915_at"	0.052796364	0.13925171	-0.44035912	-0.17883587	-0.008057594	0.14065075	0.008057594
"33916_at"	-0.052041054	-0.9725876	0.07518101	-0.30406666	0.15918064	-0.124302864	0.12975788
"33917_at"	0.011939049	-0.08533001	-0.27226973	-0.011939049	-0.050858498	-0.216156	0.026460648
"33918_s_at"	-0.1884141	0.4385624	0.081189156	0.29265547	-0.06954813	-0.1056962	-0.19369888
"33919_at"	0.38100338	-0.025142193	0.087767124	-0.028665543	0.3726759	-0.035137653	-0.18976212
"33920_at"	0.12839699	0.80083275	-0.024318695	0.07781124	-0.12149429	0.006736755	-0.051356316
"33921_at"	-0.061962128	-0.11939335	-0.13971233	0.03399563	0.09626293	0.11767101	0.015895367
"33922_at"	0.114554405	0.26043415	0.132061	0.08531904	-0.07463884	0.16207457	-0.24226427
"33923_s_at"	0.015094757	0.39610505	0.05289364	0.15943623	-0.33718657	0.14194393	-0.2211895
"33924_at"	0.50926304	-0.27958012	-0.46635675	-0.16452551	0.043346405	-0.3627534	0.23579884
"33925_at"	0.14029026	0.1513071	-0.066804886	0.06441164	-0.001573086	0.09619808	-0.10733175
"33926_at"	-0.02588129	0.019542694	-0.29301786	-0.1019125	-0.12079859	-0.19438744	-7.56E-04
"33927_i_at"	0.38338423	0.24248552	0.5733576	0.014860153	-0.0880909	0.07583809	0.08245897
"33928_r_at"	-0.043141365	0.10874581	0.20703316	-0.028128862	-0.17188	-0.20927715	0.003788948
"33929_at"	-0.16660118	0.042085648	-0.7497492	-0.65223885	-0.010539055	0.30726147	0.17346
"33930_at"	-0.9040437	0.060458183	-0.89849234	0.10955858	-0.09780264	-0.041480064	0.122979164
"33931_at"	-0.078409195	1.087286	-0.09050655	-0.62185955	-0.0519104	0.17246437	0.19505978
"33932_at"	-0.07448101	0.009893894	-0.259171	-0.13871384	-0.009893894	-0.20098066	0.010347366
"33933_at"	-0.17361927	-0.1626792	-0.1648798	0.071128845	1.1116161	0.9637232	1.4225292
"33934_at"	-0.25782776	0.02002287	0.35838413	-0.06517649	-0.77732277	0.1541233	0.025018215
"33935_at"	-0.019024372	0.04427433	-0.21362257	0.4168272	-0.09813309	-0.002438545	-0.12890244
"33936_at"	-1.1835477	0.23623943	-0.34304047	-0.569664	-0.24834776	0.14853811	0.4442339
"33937_at"	0.18232632	0.10857296	0.38933134	0.06707716	-0.0278759	-0.14370012	-0.20168495
"33938_g_at"	-0.14028788	0.025478125	0.32811022	0.1403668	-0.08273196	-0.12971091	-0.025138617
"33939_at"	0.050176144	0.09059143	0.102507114	0.104035854	0.05963564	0.08351135	-0.12828064
"33940_at"	0.08859229	-0.09616089	-0.15383601	-0.03439045	-0.06007409	0.039510727	-0.001549006
"33941_at"	0.003053188	-0.06132412	-0.003053665	0.074491024	-0.021091938	0.046168804	-0.20329046
"33942_s_at"	0.06542206	-0.23079777	0.218297	0.6883364	-0.80144024	-0.88569546	-0.18526936
"33943_at"	-0.23081875	0.03058052	-0.77978516	-0.45708942	0.62226105	0.11569691	0.06795025
"33944_at"	1.1636753	-0.2814741	-0.37611198	-0.06860733	-0.12085533	-0.31574726	0.21086216
"33945_at"	0.5036769	0.25779343	0.26187086	0.029101372	0.06358194	0.16594458	-0.06287575
"33946_at"	0.12547636	0.15021038	0.059649467	0.09496403	-0.02596426	0.059693336	-0.070072174
"33947_at"	0.4775114	0.2483387	0.18466187	-0.044690132	0.04848385	0.003263474	-0.003263474
"33948_at"	0.091724396	0.48943758	0.102332115	-0.025352001	0.08876991	-0.016414165	-0.051898956
"33949_at"	0.14117765	0.24774837	0.17266226	-0.001377583	0.0676589	0.40208006	0.001377106
"33950_g_at"	0.16611671	0.35848236	-0.061517715	0.15985966	0.09005737	0.240695	-0.255929
"33951_at"	0.11109495	0.08026886	-0.15058947	-5.44E-04	-0.024959564	-0.09822893	5.44E-04
"33952_at"	0.008090973	0.15791321	-0.10756302	-0.030385017	0.038373947	-0.18089867	-0.06109333
"33953_at"	0.3195634	0.32143688	0.2111144	0.031523228	0.21318054	0.36289406	-0.04405594
"33954_at"	-0.00196743	0.18455076	0.05400753	0.00196743	-0.013537407	-0.019833088	0.023250103
"33955_at"	0.13088202	-0.002071142	0.37008643	0.12171388	-0.044748068	0.008296251	-0.07628679
"33956_at"	-0.15660429	0.07815647	1.544333	-0.36122417	0.18625402	-0.079482555	0.040792942
"33957_at"	0.10650325	-0.025459051	0.15798259	-0.096074104	0.10089564	0.030073166	-0.06730032
"33958_at"	-0.13625336	0.18361378	-0.03403783	0.013780594	0.057767868	-0.11999607	-0.013780594
"33959_at"	-0.09468651	-0.007442474	0.24165964	0.002322674	0.09325123	0.05423355	-0.11722088
"33960_s_at"	0.048768997	0.004057884	0.002768517	0.061849594	-0.01745987	0.19631004	-0.1711731
"33961_at"	0.2838087	0.24436283	0.1365223	-0.02463293	0.106986046	0.2775464	0.02463293
"33962_at"	0.28099203	0.2539835	0.5637779	-0.13482475	0.11490488	0.09742832	-0.16499662
"33963_at"	0.08631706	-0.005725384	0.16103363	0.062987804	-0.21284485	0.3304615	-0.24225378
"33964_at"	0.06860685	0.16697025	0.03523588	0.05899334	0.05145359	-0.10125494	-0.22098923
"33965_at"	-0.07527161	0.1547947	-0.02782917	0.004391193	-0.09059906	-0.14928913	-0.16714764
"33966_at"	0.11675286	-0.060723066	0.13246727	0.017737389	-0.13453054	0.031976223	-0.16375113
"33967_at"	-0.006741524	0.08602047	-0.044063568	0.012507439	0.040551186	-0.060276985	-0.09004974
"33968_at"	0.22519922	0.38979864	0.056108475	-0.06909609	0.041131496	-0.02107501	-0.017429113
"33969_at"	0.22649813	0.13530397	-0.003238201	0.117375374	0.09376955	2.42E-04	-0.12497759
"33970_at"	0.35233307	-0.04456711	-0.006562471	0.25332117	-0.029686213	0.014575005	-0.10985041
"33971_f_at"	0.29337883	0.044293404	0.00172472	-0.047820568	-0.00172472	0.011043549	-0.084821224
"33972_r_at"	-0.001549006	0.22996354	0.33495736	-0.005757809	0.115541935	0.2945783	-0.060721874
"33973_at"	0.1596818	0.28429174	0.09665346	-0.005708695	0.08368683	0.15919828	-0.17712927
"33974_at"	0.24738407	-0.09618378	0.08237791	0.04495716	0.024328232	-0.061953068	0.07322502
"33975_at"	0.08715725	0.03564644	0.1094327	0.026236534	-0.015701294	0.19736385	-0.034109592
"33976_at"	-0.032975197	0.17038298	0.060827732	-0.11556792	0.18648386	-0.064536095	-0.19665551
"33977_at"	0.090620995	0.3528738	0.051333427	0.09134054	0.035316944	0.18640184	-0.058218956
"33978_at"	0.06719923	0.033448696	0.21256828	0.7349572	0.010215282	0.05518484	-0.40774632
"33979_at"	0.2598796	0.3675642	0.14861917	-0.20306492	0.16756392	0.6159301	-0.08011532
"33980_at"	0.12940454	0.16110706	-0.02583313	0.06798506	-0.013481617	-0.25070238	-0.045479298
"33981_at"	0.24629879	0.21551895	0.5304918	0.008712769	-0.008712769	0.33124685	-0.19776964
"33982_f_at"	-0.016618729	-0.30370474	-0.32654476	-0.055294514	-0.08152437	-0.4081211	0.29498768
"33983_at"	0.25484657	0.15391302	0.17826271	0.004309654	0.053155422	-0.048008442	-0.16235828
"33984_at"	-0.15477848	-0.3565855	0.08398819	-0.24917126	0.018593788	-0.12569237	0.032636642
"33985_s_at"	0.0574646	-0.049437046	0.42895842	0.050675392	-0.26167393	-0.14702225	-0.08279467
"33986_r_at"	0.024516106	-0.45386982	0.414999	0.32031536	-0.66847944	-1.2097459	0.06358242
"33987_at"	-0.22185993	0.1344223	-0.03563881	0.11303043	-0.14814758	-0.23853397	0.13858032
"33988_at"	-0.023005486	-0.93208885	-0.5274906	0.11969948	0.1827879	-0.04834938	0.1306076
"33989_f_at"	0.042658806	-0.6754551	-0.042658806	0.1181097	-0.08357334	-0.42458344	0.13687134
"33990_at"	0.14390087	0.24595022	0.00131321	-0.18007517	-0.12689018	0.013961792	-0.05303955
"33991_g_at"	-0.008100271	0.14585829	0.16872716	-0.06310606	0.008100271	0.1303885	-0.08613849
"33992_at"	0.07292175	-0.09098244	-0.023391247	0.05374813	0.011209488	0.15024137	-0.037929058
"33993_at"	-0.17968178	0.13489628	0.036254883	0.01762104	-0.10342693	-0.049489975	0.065428734
"33994_g_at"	-0.08890247	0.17439556	-0.4900484	0.001660347	-0.294981	0.1091032	0.25937176
"33995_at"	0.08239555	0.06688213	-0.024549007	0.12667894	-0.12277794	-0.08229494	-0.060165882
"33996_at"	0.10451937	0.057815075	0.010267735	-0.097257614	0.012882233	0.09236908	0.004106522
"33997_at"	-0.010422945	0.01956129	-0.004473209	0.09386635	-0.33191252	-0.13107395	-0.0647583
"33998_at"	-3.3269463	-3.7801113	1.2635078	2.1297255	-0.48116684	-3.05797	0.84860516
"33999_f_at"	0.23718786	0.27202463	-0.045468807	-0.14241791	0.121385574	0.16286659	-0.13405275
"339_at"	-0.59160423	-0.47965002	0.070958614	1.2142854	0.30496693	-0.6720538	0.06005621
"34000_r_at"	0.08545375	0.015214443	-0.11646366	0.1214509	-0.006425142	0.002515316	-0.03166914
"34001_at"	0.14123869	-0.5517144	-0.15684271	-0.18949223	0.037632942	-0.24000502	0.106944084
"34002_at"	-0.021724224	-0.014802456	-0.009453774	-0.12594366	-0.1405797	-0.57252836	-0.122335434
"34003_at"	0.2721653	-0.52317905	-0.41667652	0.3194523	0.49430656	0.13100433	-0.052739143
"34004_at"	0.06276393	0.07104015	0.09246516	-0.030393839	4.95E-04	0.08045173	-0.029279947
"34005_at"	0.18068504	0.02963543	-6.12E-04	0.013101101	-0.0149827	-0.14691544	-0.12642956
"34006_s_at"	0.18828201	0.041642666	0.082960606	-0.005226612	0.047246456	-0.09667492	-0.29365444
"34007_at"	0.27801418	0.1526463	0.056582212	0.0912509	-0.09161234	-0.17351079	-0.109464884
"34008_at"	0.14068937	0.059422016	0.117111206	0.058243275	-0.06344032	-0.20665503	-0.031327724
"34009_at"	-0.02628994	0.19382715	0.10760975	0.09029627	-0.14727592	-0.030966759	-0.14887857
"34010_at"	0.16269588	0.1178422	0.49708605	-0.052103043	0.2949152	0.11997318	-0.2044115
"34011_at"	-0.070587635	0.1587553	0.09583187	-0.009810925	-0.101252556	-0.3175187	-0.06579447
"34012_at"	-0.16625452	0.00495863	-0.11542368	0.014273167	0.060728073	-0.09410238	-0.15808916
"34013_f_at"	-0.19611931	-0.011520386	0.33932972	0.24713182	-0.27334356	-0.71171474	-0.06757307
"34014_f_at"	-0.329659	0.055095196	0.52661705	0.18062973	-0.5454588	-0.27822304	-0.055095196
"34015_at"	0.30615044	0.24390411	0.5969	-0.048210144	0.15349817	0.37329197	-0.015346527
"34016_s_at"	0.09161854	0.10572481	-0.18635702	-0.033742428	-0.04071331	0.028841972	-0.15513468
"34017_s_at"	0.06441212	0.27794552	0.2338314	-0.079847336	-0.19918251	-0.032063007	-0.1687727
"34018_at"	-0.002488613	0.083706856	0.073402405	-0.19175148	0.002488613	-0.19243908	-0.12159014
"34019_at"	-0.007931709	0.19129658	0.51431227	0.22144079	-0.115643024	0.039813995	-0.21251535
"34020_at"	-0.17296076	-0.08372402	0.06858921	0.0912137	0.035456657	0.33468056	-0.05517006
"34021_at"	0.011596918	0.25999832	-0.08645558	0.21553373	0.24784207	0.28956747	0.020183802
"34022_at"	0.18071079	0.21532202	0.33352423	-0.054427147	-0.038626194	0.19753265	0.038626194
"34023_at"	-0.072178125	0.32581258	-0.18874407	-0.038323402	0.097681046	-0.10356188	0.042574167
"34024_at"	0.22190857	0.001474857	-0.20820284	-0.002754211	0.006194592	-0.26411104	-0.001474857
"34025_at"	0.0469234	-0.11142111	0.12620091	0.003987789	0.040409565	0.025004148	-0.15098262
"34026_at"	0.21262169	-0.100085735	0.15044355	0.20697117	0.046081066	-0.011476994	-0.054074287
"34027_f_at"	0.2918539	0.26324368	0.1978097	0.08643055	-0.20537615	-0.096950054	-0.19081163
"34028_at"	-0.31648588	0.14915323	-0.14315128	0.5304241	-0.3747368	-0.4511218	0.006347656
"34029_at"	-0.11362624	0.030023575	0.05892515	-0.15426278	-0.036574602	0.09000969	0.010936499
"34030_at"	0.29010248	-0.02960968	0.4400754	0.061062813	0.12959051	0.1943717	-0.011151791
"34031_i_at"	-1.2112775	-0.7698636	-0.07646322	0.07646322	-0.3628707	-0.5769248	0.27904987
"34032_at"	-0.003021717	-0.14813519	-0.11815643	0.03372574	0.03734827	-0.21578121	0.065891266
"34033_s_at"	-0.046242237	0.14674664	0.1982336	-0.13064289	0.06150961	0.44069958	-0.05163288
"34034_at"	0.053326607	0.01993227	0.09215164	-0.029315948	-0.019931793	-0.034781456	-0.11296797
"34035_at"	0.07995939	0.07138729	0.022328854	-0.028459549	-0.006229878	0.07197857	0.08326101
"34036_at"	-0.15424299	0.39869738	0.23225403	-0.09942961	0.0175848	0.21491718	-0.24760151
"34037_at"	0.102890015	0.23582554	-0.13735962	-0.061632156	0.008213043	0.057409763	-0.10146761
"34038_at"	0.11052036	0.3503561	-0.043774605	0.06477451	-0.061405182	-0.14506102	-0.13178873
"34039_at"	0.016797066	0.14103079	-0.032033443	-0.26079464	0.043250084	0.49580193	-0.14678454
"34040_s_at"	0.027707577	0.095059395	0.113817215	0.07253885	0.029964924	-0.066002846	-0.032260418
"34041_at"	0.002704144	-0.04270172	0.2608652	0.03307247	0.015669823	-0.18943548	-0.015025616
"34042_at"	-0.11199522	0.07963991	-0.003834724	0.003834724	-0.052660942	-0.10614586	-0.11997843
"34043_at"	-0.03785324	0.051530838	-0.040256977	-0.008314133	-0.050599575	0.14758682	0.008314133
"34044_at"	0.113548756	-0.05489397	0.16032887	-0.07816696	-0.07525873	0.0843215	-0.017436028
"34045_at"	0.41070175	-0.012685299	0.5080304	0.012685299	0.03648424	0.11969805	-0.14457321
"34046_at"	0.14375114	0.14072132	0.1623478	0.048444748	-0.026242256	-0.15967035	-0.10058403
"34047_at"	0.16847038	0.25486517	0.17369556	-0.006669521	0.06466675	-0.09011793	-0.14793158
"34048_at"	0.18656397	0.25149393	0.44679642	0.05393505	-0.017468452	-9.57E-04	-0.19326496
"34049_at"	0.21908188	0.2281084	0.2891698	0.029855728	-0.01661253	0.1505022	-0.14865637
"34050_at"	0.35818624	0.40080833	0.12902927	0.027632713	0.011639595	0.4267063	-0.113212585
"34051_at"	0.11180115	0.29790783	0.16950417	0.007996559	-6.72E-04	6.72E-04	-0.005166054
"34052_at"	0.00642395	0.054074764	-0.15954971	0.04265976	0.027118206	-0.094276905	-0.09081411
"34053_at"	0.14637518	0.34642935	0.17055178	0.15320635	-0.0916245	-0.17434263	-0.091165304
"34054_at"	0.23868942	0.34043217	0.060005188	0.08305168	-0.007482529	0.04813385	-0.048114777
"34055_at"	0.25376606	0.33691454	0.048956394	-0.08222914	-6.97E-04	0.14463091	-0.06324005
"34056_g_at"	-0.020381927	0.06755686	0.16459084	0.020382404	-0.39238214	-0.30991888	-0.3117137
"34057_at"	-0.015897274	0.18171358	-0.09069109	-0.006818771	0.017664433	-0.04440832	0.061899662
"34058_at"	0.009114742	-0.020524502	-0.22710085	-0.09213209	0.026210308	-0.1936264	0.16845131
"34059_at"	0.4243374	0.30346918	0.19983578	0.079352856	-0.042971134	0.08751392	-0.12895966
"34060_g_at"	-8.64E-04	-0.14651203	-0.006153107	0.26073933	0.06943321	8.64E-04	-0.053373814
"34061_at"	0.08217001	0.13152885	0.0486722	0.04692173	-0.023171425	-0.01804638	-0.029887676
"34062_at"	0.14803696	0.27067518	0.5753007	0.15092278	-0.01965475	0.10828686	-0.11248207
"34063_at"	0.18288946	0.019752502	0.42321682	0.012469769	-0.1209631	0.111340046	-0.20182467
"34064_s_at"	0.095767975	0.3428898	0.02304554	0.028662682	0.059782982	0.00754261	-0.08842659
"34065_at"	-0.06799698	0.0638423	0.007219791	0.057967663	0.092488766	0.08559847	-0.029191494
"34066_at"	0.14695263	0.11324406	0.066402435	0.05914879	0.027355194	0.19703007	-0.14317417
"34067_at"	0.038549423	0.08300495	-0.100803375	0.002202988	0.027872086	0.08031082	-0.026853561
"34068_f_at"	0.3166976	0.36041594	0.08745098	0.049919605	0.18365669	0.2837453	-0.15943289
"34069_s_at"	0.050798893	0.122774124	0.30735397	0.07706356	0.029778004	0.04197979	-0.34480333
"34070_s_at"	0.26686287	0.33825016	0.14814281	0.080984116	-0.09540796	0.13916016	-0.16284513
"34071_at"	0.039779663	0.021859169	0.02812481	0.09693527	0.020938873	-0.08944607	-0.27129555
"34072_s_at"	0.101239204	0.13036203	0.044652462	0.030350685	0.07277155	0.49082804	-0.056824207
"34073_s_at"	0.09294987	0.104316235	-0.02234745	0.07963228	-0.009519577	0.003698826	-0.025324821
"34074_s_at"	-0.03208542	-0.06587219	0.08336544	0.09642601	-0.20866442	-0.26196098	-0.03157711
"34075_at"	0.19465828	0.083114624	0.40624	0.02741003	0.1479826	0.009119511	-0.1486988
"34076_at"	0.07615566	-0.34141922	0.197721	-0.043105602	-0.016387463	0.3333063	0.016387463
"34077_at"	0.22131348	0.008315086	0.1479721	-0.008808136	-0.012441635	-0.001594544	0.001594544
"34078_s_at"	-0.04905367	-0.06606197	-0.13899183	0.06845808	-0.16400003	-0.2813301	-0.04014826
"34079_at"	0.009186745	-0.030400276	-0.11449051	0.034323692	-0.20350266	-0.108950615	-0.05535698
"34080_at"	0.012252808	0.016220093	0.08945751	0.106639385	0.05726099	0.04929638	-0.052260876
"34081_at"	9.83E-04	0.21887016	-9.83E-04	0.033489227	0.11114168	0.014431	-0.16366863
"34082_at"	-0.007340908	0.05415535	0.119737625	-0.047198296	-0.17137527	-0.1497364	-0.17714787
"34083_at"	0.32683754	0.315135	0.11422014	0.20465183	-0.01793003	0.26779604	-0.05398178
"34084_at"	-0.046216726	0.46101713	0.16087198	0.10894799	0.01631546	0.13167858	-0.26980376
"34085_at"	-0.06805706	-0.30603027	0.46574497	0.012257576	0.22832012	0.34821796	-0.113677025
"34086_at"	0.04988289	0.14150333	-0.112504005	0.06855202	-0.12973404	-0.11582279	-0.07292938
"34087_at"	0.11323643	0.1574831	0.003127098	0.002952814	-0.002952576	-0.132483	-0.09676385
"34088_at"	0.03246832	0.1014142	0.10471439	0.27280855	-0.14276266	-0.039099693	-0.13906622
"34089_at"	-0.003289223	-0.020967484	-0.17139435	-0.11338711	0.006343842	-0.06219673	0.007208824
"34090_at"	-0.070693016	0.10565853	0.240376	0.13743305	0.108971596	0.31428766	-0.055416107
"34091_s_at"	0.49127388	0.26367378	-2.233477	-0.18043995	0.64496803	-0.6738	0.11167431
"34092_at"	-0.007302761	0.19136715	0.27198172	-0.051216125	0.030950546	0.029868126	0.006386757
"34093_at"	0.044749737	0.06816721	0.061510563	-0.09387684	0.08610678	-0.07733488	-0.10181427
"34094_i_at"	0.45152044	0.07959986	0.24180222	-0.08679962	0.063883305	0.3131647	-0.20250702
"34095_f_at"	0.43868256	0.046243668	0.26826954	-0.07104969	-0.02177763	-0.001518726	-0.16018629
"34096_at"	-0.04081416	0.29532266	0.37997007	0.18649435	0.03362727	-0.001751661	0.001751661
"34097_at"	-0.018106937	0.07179284	0.002379656	-0.062702894	-0.002379417	-0.13442874	0.06806326
"34098_f_at"	0.6505532	0.23751783	0.44650316	0.07510567	-0.03614998	0.5578022	-0.06676149
"34099_f_at"	-0.7180085	-0.58168507	-0.070981026	0.4258418	-0.23200226	-0.2717576	0.7057977
"340_at"	-0.058502197	-0.111222744	0.08587694	0.10312796	0.114317894	-0.05618143	-0.10323954
"34100_at"	-0.039521694	0.326684	-0.12223816	0.007858753	0.08963251	0.057647705	-0.16571069
"34101_at"	0.3309188	0.33917713	0.31751108	0.117620945	0.19376993	-0.08573532	-0.004522324
"34102_at"	0.3149128	0.22621393	0.09785843	0.04192829	0.018026829	0.10524559	-0.29055262
"34103_at"	0.043208122	0.26055193	-0.06332636	-0.037652493	-0.011590958	-0.11859727	0.11940098
"34104_i_at"	0.10875416	-0.042782784	0.14093399	0.04873848	0.39218807	0.028562546	-0.15793991
"34105_f_at"	1.6801548	-0.063307285	0.05786991	0.001873493	0.015981674	0.003501415	-0.23832655
"34106_at"	0.16777372	0.14296675	0.06078577	-0.07625723	-0.16177177	-0.086557865	-0.22010899
"34107_at"	0.24798012	0.056695938	-0.27059364	0.035579205	0.1584549	-0.09701109	-0.04385996
"34108_g_at"	0.008987904	0.2613511	-0.03348875	-0.105326176	-0.004818916	-0.15739775	0.06281948
"34109_at"	0.09406853	-0.06659889	0.26795292	0.044592857	-0.12719393	-0.18873978	-0.1696248
"34110_g_at"	0.20423889	0.1211319	0.03627014	0.057148933	-0.003088951	-0.024711609	-0.13279247
"34111_s_at"	0.07256031	0.083164215	-0.05101943	-0.03839636	0.17333174	-0.040406466	-0.2884512
"34112_r_at"	-0.17567205	-0.18141842	-0.42657852	-0.15437794	-0.17518568	-0.4603963	0.08069229
"34113_at"	0.00512147	0.19817519	0.1114974	-0.096628904	0.062289238	-0.018120766	-0.025904894
"34114_at"	-0.25621247	0.08191681	-0.06715679	-0.16374803	0.005883217	-0.005883217	0.25225782
"34115_at"	0.0745697	0.034439802	0.062702894	0.016280174	-0.049349308	-0.18717718	-0.007535458
"34116_at"	-0.028957844	-0.052254677	-0.14516401	0.0376482	0.060332775	-0.2840042	0.047337055
"34117_at"	0.004395485	0.059885025	0.1314373	0.06995869	-0.004395485	0.009767532	0.19230509
"34118_at"	0.26329517	-0.31202745	-0.026083946	0.5503135	-0.013411522	-0.13835621	0.20062637
"34119_at"	0.37084246	0.29623842	0.31305456	0.050635815	0.1816063	0.18827868	-0.05326605
"34120_r_at"	0.28147697	0.07107878	0.13518906	-0.23077583	0.04040408	-0.07809281	-0.28240085
"34121_at"	0.06261921	0.11598301	0.07920313	-0.06687927	-0.16351461	-0.005870819	0.005870819
"34122_at"	0.07243204	0.20221663	-0.037439346	0.020904541	-0.08695412	-0.32017088	-0.08531904
"34123_at"	0.046112537	0.13690948	-0.06187582	-0.002708435	0.107507944	0.14919233	-0.015536308
"34124_at"	-0.1572957	0.24015284	0.61765957	-0.060391903	-0.033486843	0.04757738	-0.012681484
"34125_at"	0.22591066	0.2971611	0.33902693	-0.07335329	0.06486654	-0.06486654	-0.17480373
"34126_at"	0.18844175	0.13801575	0.097536564	-0.0712347	0.00490284	0.22028732	-0.17580986
"34127_at"	0.17668152	0.3403945	0.4157982	-0.06822634	-0.25780487	-0.060688972	-0.15220451
"34128_at"	-0.0728631	-3.67E-04	0.001832008	0.07909727	-0.01946354	-0.034729004	-0.17219687
"34129_at"	0.08546305	-0.03465414	-0.013676167	-0.07805395	-0.014009476	-0.07081747	0.058422565
"34130_at"	5.18E-04	0.047050476	0.35535288	-0.16358757	-5.18E-04	-0.2068901	-0.13946533
"34131_at"	0.03005886	0.042310238	-0.12334442	0.011864185	-0.011864662	-0.24502468	-0.03993559
"34132_at"	0.30277443	0.003848553	0.65309095	0.79516363	-0.74821806	-1.2545421	-0.3796301
"34133_at"	0.057330847	0.18299174	0.23059893	0.10546231	0.02771306	-0.02097702	-0.10834074
"34134_at"	0.055161953	0.24704885	0.095225334	0.003189087	0.057352066	-0.017676353	-0.041048527
"34135_at"	0.04678297	0.16317654	-0.022951126	-0.029344559	-0.044228077	0.022951126	-0.09031248
"34136_s_at"	0.051025867	0.1663642	0.08228016	-0.021055222	-0.11860299	0.088924885	-0.019138336
"34137_at"	0.12872124	0.27671576	0.55085707	-0.002271652	0.14287138	0.48226166	-0.016709805
"34138_at"	0.2173295	0.19195557	-4.23E-04	4.23E-04	-0.059425354	-0.22036457	-0.065140724
"34139_at"	0.17866802	0.17894268	0.04193592	0.10205555	0.043432236	0.09816551	-0.21402264
"34140_at"	0.20574665	0.20609593	-0.035926104	-0.003955603	0.14309502	-0.14827323	-0.020438433
"34141_at"	0.03915167	0.1692462	-0.021978855	0.04929447	0.037151814	-0.10876465	-0.2564311
"34142_at"	-0.05969	0.108464	0.23763394	0.13483834	0.061439753	0.05637312	-0.17526102
"34143_at"	0.1991601	0.16301823	0.017055035	-0.028767109	0.042443752	0.45489454	-0.100333214
"34144_at"	0.29565954	0.12533903	-0.009908676	0.056823254	0.024589539	-0.031297207	-0.024192333
"34145_at"	0.23538637	0.07021284	0.14853477	-0.050207138	0.0500741	4.43E-04	-0.13634825
"34146_at"	0.12233925	0.06725693	-0.03312111	0.14935303	0.12687874	-0.029741287	-0.089930534
"34147_g_at"	0.17562866	-0.001573563	0.032931328	0.022927284	0.08450031	-0.16248798	-0.19802094
"34148_at"	0.19599295	-0.9219465	-0.18292141	-0.80796623	0.47786617	0.0903039	0.10540533
"34149_at"	0.12490797	0.24000406	0.21031427	-0.032808304	-0.2553439	-0.024402618	-0.2572918
"34150_at"	-0.16512775	0.004442215	-0.12552547	-0.03784895	-0.27421093	-0.31099367	0.28079224
"34151_at"	0.006540299	0.2519865	0.02687645	0.009137154	-0.054546356	0.17036438	-0.098563194
"34152_at"	0.17980862	0.32482958	0.2547698	0.034056187	0.05482006	0.090156555	-0.034056187
"34153_at"	0.003517151	0.2704954	0.39660168	0.05553913	0.09890938	-0.003516674	-0.05733061
"34154_at"	0.08822346	0.0742178	-0.001608849	0.020964622	0.076649666	0.001608849	-0.22541714
"34155_s_at"	0.042732716	-0.033984184	-0.15999651	0.03972721	0.07257128	-0.3594494	-0.122980595
"34156_i_at"	0.1603179	0.31344032	0.12437582	-0.05841732	0.14356184	0.39317226	-0.1217041
"34157_f_at"	-0.013183117	-0.18351173	0.002610683	0.23248291	-0.09921169	-0.29935694	-0.13908434
"34158_s_at"	0.049925566	0.05658269	0.07431507	-0.003890514	-0.08258343	0.30428648	-0.16954422
"34159_at"	0.106621265	0.10671854	-0.061365128	0.18053246	0.21864271	-0.016666412	-0.09210062
"34160_at"	-0.2808876	-0.24766827	-0.6819	-0.0668087	0.80510235	0.6569233	0.9112873
"34161_at"	-0.001502037	0.14999962	-0.09759617	0.045091152	0.080320835	0.090379715	-0.020554543
"34162_at"	-0.061903954	-0.28637075	-0.048582077	-0.0208745	0.2759781	-0.39093828	0.17853451
"34163_g_at"	0.036010742	0.10283637	-0.001935482	0.02268815	0.13498712	0.17466259	0.001935482
"34164_at"	0.001375198	-0.001375198	-0.23050499	0.1920414	-0.22531128	-0.0957613	0.001591682
"34165_at"	0.29404068	0.12877321	0.3592868	0.026097298	-0.04308939	0.1577878	-0.06116438
"34166_at"	0.25603008	0.20396423	0.10461235	0.032847404	0.013760567	0.14851952	-0.14566708
"34167_s_at"	0.14507914	-0.029481888	-0.057551384	0.014026165	1.82E-04	-0.05020857	-0.085902214
"34168_at"	0.15763569	0.14366317	0.066963196	0.11678672	0.008497715	0.1932373	-0.008497953
"34169_s_at"	-0.049551964	-0.41356468	-0.4524207	-0.47177982	0.09661436	0.16628075	0.4886036
"34170_s_at"	0.4748273	0.3516488	0.68033123	-0.031999588	0.031999588	0.45503044	-0.07260275
"34171_at"	-0.13850641	0.06388283	-0.06447983	-0.06378698	-0.07590532	0.10301924	-0.07261467
"34172_s_at"	0.08651829	-7.86E-04	7.86E-04	0.11400986	-0.15857458	-0.38575745	-0.08887339
"34173_s_at"	-0.010444403	-0.029714108	-0.0294168	0.07746625	-0.08634043	-0.006344318	0.112383366
"34174_s_at"	-0.2268629	-0.017440319	-0.34253454	0.03198862	0.04804182	0.10817957	0.0941
"34175_r_at"	0.20410395	-0.19239187	0.016420841	0.09896946	0.33598423	-0.17734575	0.19291735
"34176_at"	0.048779964	0.13885355	-0.09407616	-0.10875893	-0.15230322	0.056444168	0.007949352
"34177_at"	0.021606445	-7.77E-04	0.18231487	-0.02691555	-0.13408422	-0.119736195	7.77E-04
"34178_at"	0.11237335	-0.27953053	0.022655964	0.11012697	-0.2817378	0.004622936	-0.08754206
"34179_at"	0.280612	-0.0910635	0.27830362	0.10373163	-0.10559368	0.073124886	-0.26358318
"34180_at"	0.007133484	-0.049687386	-0.007133484	0.1541419	0.15696096	-0.41684914	-0.39120436
"34181_at"	-0.044229507	0.737772	-0.12715435	-0.05959463	0.09217119	0.09285307	-0.043977737
[truncated: 776,148 more chars]
