# Supplementary material for: Corrigendum to “Identification of Differentially Expressed Genes in Pituitary Adenomas by Integrating Analysis of Microarray Data”
Source: Int J Endocrinol. 2018 Sep 6;2018:6069189. doi: 10.1155/2018/6069189 (PMC6146651; doi:10.1155/2018/6069189)
Supplement: Supplementary 1 — The raw data of the included datasets downloaded from GEO database. [file 6069189.f1.zip › row data_GSE46311_series_matrix.txt]

!Series_title	"Gene expression analysis of growth hormone producing somatotroph pituitary adenomas"
!Series_geo_accession	"GSE46311"
!Series_status	"Public on Jun 10 2013"
!Series_submission_date	"Apr 23 2013"
!Series_last_update_date	"Jul 11 2017"
!Series_summary	"The epithelial marker E-cadherin plays a crucial role in epithelial mesenchymal transition (EMT). Decreased protein content in somatotroph adenomas has been associated with increased tumor size, invasion, and poor response to somatostatin analog (SA) treatment, but the potential mechanisms of EMT progression in these adenomas are lacking. Adenomas from sixteen acromegalic patients, eight with high (tertile 3)and eight with low (tertile 1) expression of E-cadherin where four adenomas treated with SA in each group, were screened for expressional candidate genes using Affymetrix human Gene Plus 2.0 Arrays. Analyses were performed to identify EMT-related transcripts."
!Series_overall_design	"Expression levels were examined in adenomas from sixteen acromegalic patients, eight with high (tertile 3) and eight with low (tertile 1) expression of E-cadherin where four adenomas were treated with SA in each group."
!Series_type	"Expression profiling by array"
!Series_contributor	"Tove,,Lekva"
!Series_contributor	"Thor,,Ueland"
!Series_contributor	"Jens,P,Berg"
!Series_contributor	"Jens,,Bollerslev"
!Series_contributor	"Ole,K,Olstad"
!Series_sample_id	"GSM1128550 GSM1128551 GSM1128552 GSM1128553 GSM1128554 GSM1128555 GSM1128556 GSM1128557 GSM1128558 GSM1128559 GSM1128560 GSM1128561 GSM1128562 GSM1128563 GSM1128564 GSM1128565 "
!Series_contact_name	"Tove,,Lekva"
!Series_contact_email	"tove.lekva@medisin.uio.no, tove.lekva@ous-hf.no"
!Series_contact_department	"Section of Specialized Endocrinology and Institute for Internal Medicine"
!Series_contact_institute	"OUS-HF, Rikshospitalet"
!Series_contact_address	"Sognsvannsveien 20"
!Series_contact_city	"Oslo"
!Series_contact_zip/postal_code	"0027"
!Series_contact_country	"Norway"
!Series_supplementary_file	"ftp://ftp.ncbi.nlm.nih.gov/geo/series/GSE46nnn/GSE46311/suppl/GSE46311_RAW.tar"
!Series_platform_id	"GPL6244"
!Series_platform_taxid	"9606"
!Series_sample_taxid	"9606"
!Series_relation	"BioProject: https://www.ncbi.nlm.nih.gov/bioproject/PRJNA198731"

!Sample_title	"Somatotroph adenoma 153"	"Somatotroph adenoma 185"	"Somatotroph adenoma 192"	"Somatotroph adenoma 253"	"Somatotroph adenoma 273"	"Somatotroph adenoma 276"	"Somatotroph adenoma 280"	"Somatotroph adenoma 291"	"Somatotroph adenoma 320"	"Somatotroph adenoma 321"	"Somatotroph adenoma 323"	"Somatotroph adenoma 328"	"Somatotroph adenoma 329"	"Somatotroph adenoma 330"	"Somatotroph adenoma 331"	"Somatotroph adenoma 343"
!Sample_geo_accession	"GSM1128550"	"GSM1128551"	"GSM1128552"	"GSM1128553"	"GSM1128554"	"GSM1128555"	"GSM1128556"	"GSM1128557"	"GSM1128558"	"GSM1128559"	"GSM1128560"	"GSM1128561"	"GSM1128562"	"GSM1128563"	"GSM1128564"	"GSM1128565"
!Sample_status	"Public on Jun 10 2013"	"Public on Jun 10 2013"	"Public on Jun 10 2013"	"Public on Jun 10 2013"	"Public on Jun 10 2013"	"Public on Jun 10 2013"	"Public on Jun 10 2013"	"Public on Jun 10 2013"	"Public on Jun 10 2013"	"Public on Jun 10 2013"	"Public on Jun 10 2013"	"Public on Jun 10 2013"	"Public on Jun 10 2013"	"Public on Jun 10 2013"	"Public on Jun 10 2013"	"Public on Jun 10 2013"
!Sample_submission_date	"Apr 23 2013"	"Apr 23 2013"	"Apr 23 2013"	"Apr 23 2013"	"Apr 23 2013"	"Apr 23 2013"	"Apr 23 2013"	"Apr 23 2013"	"Apr 23 2013"	"Apr 23 2013"	"Apr 23 2013"	"Apr 23 2013"	"Apr 23 2013"	"Apr 23 2013"	"Apr 23 2013"	"Apr 23 2013"
!Sample_last_update_date	"Jun 10 2013"	"Jun 10 2013"	"Jun 10 2013"	"Jun 10 2013"	"Jun 10 2013"	"Jun 10 2013"	"Jun 10 2013"	"Jun 10 2013"	"Jun 10 2013"	"Jun 10 2013"	"Jun 10 2013"	"Jun 10 2013"	"Jun 10 2013"	"Jun 10 2013"	"Jun 10 2013"	"Jun 10 2013"
!Sample_type	"RNA"	"RNA"	"RNA"	"RNA"	"RNA"	"RNA"	"RNA"	"RNA"	"RNA"	"RNA"	"RNA"	"RNA"	"RNA"	"RNA"	"RNA"	"RNA"
!Sample_channel_count	"1"	"1"	"1"	"1"	"1"	"1"	"1"	"1"	"1"	"1"	"1"	"1"	"1"	"1"	"1"	"1"
!Sample_source_name_ch1	"Adenoma_tertile 3_no treatment"	"Adenoma_tertile 1_SA treatment"	"Adenoma_tertile 1_no treatment"	"Adenoma_tertile 1_SA treatment"	"Adenoma_tertile 1_no treatment"	"Adenoma_tertile 1_no treatment"	"Adenoma_tertile 3_no treatment"	"Adenoma_tertile 3_SA treatment"	"Adenoma_tertile 1_SA treatment"	"Adenoma_tertile 3_SA treatment"	"Adenoma_tertile 3_SA treatment"	"Adenoma_tertile 1_no treatment"	"Adenoma_tertile 3_no treatment"	"Adenoma_tertile 3_no treatment"	"Adenoma_tertile 3_SA treatment"	"Adenoma_tertile 1_SA treatment"
!Sample_organism_ch1	"Homo sapiens"	"Homo sapiens"	"Homo sapiens"	"Homo sapiens"	"Homo sapiens"	"Homo sapiens"	"Homo sapiens"	"Homo sapiens"	"Homo sapiens"	"Homo sapiens"	"Homo sapiens"	"Homo sapiens"	"Homo sapiens"	"Homo sapiens"	"Homo sapiens"	"Homo sapiens"
!Sample_characteristics_ch1	"gender: Female"	"gender: Female"	"gender: Female"	"gender: Male"	"gender: Female"	"gender: Female"	"gender: Male"	"gender: Female"	"gender: Male"	"gender: Male"	"gender: Male"	"gender: Male"	"gender: Female"	"gender: Male"	"gender: Male"	"gender: Female"
!Sample_characteristics_ch1	"age: 68"	"age: 33"	"age: 42"	"age: 66"	"age: 57"	"age: 46"	"age: 40"	"age: 59"	"age: 46"	"age: 60"	"age: 60"	"age: 52"	"age: 56"	"age: 54"	"age: 37"	"age: 51"
!Sample_characteristics_ch1	"adenoma: pituitary"	"adenoma: pituitary"	"adenoma: pituitary"	"adenoma: pituitary"	"adenoma: pituitary"	"adenoma: pituitary"	"adenoma: pituitary"	"adenoma: pituitary"	"adenoma: pituitary"	"adenoma: pituitary"	"adenoma: pituitary"	"adenoma: pituitary"	"adenoma: pituitary"	"adenoma: pituitary"	"adenoma: pituitary"	"adenoma: pituitary"
!Sample_characteristics_ch1	"e-cadherin expression: high"	"e-cadherin expression: low"	"e-cadherin expression: low"	"e-cadherin expression: low"	"e-cadherin expression: low"	"e-cadherin expression: low"	"e-cadherin expression: high"	"e-cadherin expression: high"	"e-cadherin expression: low"	"e-cadherin expression: high"	"e-cadherin expression: high"	"e-cadherin expression: low"	"e-cadherin expression: high"	"e-cadherin expression: high"	"e-cadherin expression: high"	"e-cadherin expression: low"
!Sample_characteristics_ch1	"treatment: none"	"treatment: SA"	"treatment: none"	"treatment: SA"	"treatment: none"	"treatment: none"	"treatment: none"	"treatment: SA"	"treatment: SA"	"treatment: SA"	"treatment: SA"	"treatment: none"	"treatment: none"	"treatment: none"	"treatment: SA"	"treatment: SA"
!Sample_molecule_ch1	"total RNA"	"total RNA"	"total RNA"	"total RNA"	"total RNA"	"total RNA"	"total RNA"	"total RNA"	"total RNA"	"total RNA"	"total RNA"	"total RNA"	"total RNA"	"total RNA"	"total RNA"	"total RNA"
!Sample_extract_protocol_ch1	"Trizol extraction followed by Rneasy clean up kit (qiagen) was performed according to the manufacturer´s instruction"	"Trizol extraction followed by Rneasy clean up kit (qiagen) was performed according to the manufacturer´s instruction"	"Trizol extraction followed by Rneasy clean up kit (qiagen) was performed according to the manufacturer´s instruction"	"Trizol extraction followed by Rneasy clean up kit (qiagen) was performed according to the manufacturer´s instruction"	"Trizol extraction followed by Rneasy clean up kit (qiagen) was performed according to the manufacturer´s instruction"	"Trizol extraction followed by Rneasy clean up kit (qiagen) was performed according to the manufacturer´s instruction"	"Trizol extraction followed by Rneasy clean up kit (qiagen) was performed according to the manufacturer´s instruction"	"Trizol extraction followed by Rneasy clean up kit (qiagen) was performed according to the manufacturer´s instruction"	"Trizol extraction followed by Rneasy clean up kit (qiagen) was performed according to the manufacturer´s instruction"	"Trizol extraction followed by Rneasy clean up kit (qiagen) was performed according to the manufacturer´s instruction"	"Trizol extraction followed by Rneasy clean up kit (qiagen) was performed according to the manufacturer´s instruction"	"Trizol extraction followed by Rneasy clean up kit (qiagen) was performed according to the manufacturer´s instruction"	"Trizol extraction followed by Rneasy clean up kit (qiagen) was performed according to the manufacturer´s instruction"	"Trizol extraction followed by Rneasy clean up kit (qiagen) was performed according to the manufacturer´s instruction"	"Trizol extraction followed by Rneasy clean up kit (qiagen) was performed according to the manufacturer´s instruction"	"Trizol extraction followed by Rneasy clean up kit (qiagen) was performed according to the manufacturer´s instruction"
!Sample_label_ch1	"biotin"	"biotin"	"biotin"	"biotin"	"biotin"	"biotin"	"biotin"	"biotin"	"biotin"	"biotin"	"biotin"	"biotin"	"biotin"	"biotin"	"biotin"	"biotin"
!Sample_label_protocol_ch1	"Double-stranded cDNA and biotin-labeled cRNA probes were made from 5 μg of total RNA by use of GeneChip® Expression 3' Amplification One-Cycle Target Labeling kit (Affymetrix)."	"Double-stranded cDNA and biotin-labeled cRNA probes were made from 5 μg of total RNA by use of GeneChip® Expression 3' Amplification One-Cycle Target Labeling kit (Affymetrix)."	"Double-stranded cDNA and biotin-labeled cRNA probes were made from 5 μg of total RNA by use of GeneChip® Expression 3' Amplification One-Cycle Target Labeling kit (Affymetrix)."	"Double-stranded cDNA and biotin-labeled cRNA probes were made from 5 μg of total RNA by use of GeneChip® Expression 3' Amplification One-Cycle Target Labeling kit (Affymetrix)."	"Double-stranded cDNA and biotin-labeled cRNA probes were made from 5 μg of total RNA by use of GeneChip® Expression 3' Amplification One-Cycle Target Labeling kit (Affymetrix)."	"Double-stranded cDNA and biotin-labeled cRNA probes were made from 5 μg of total RNA by use of GeneChip® Expression 3' Amplification One-Cycle Target Labeling kit (Affymetrix)."	"Double-stranded cDNA and biotin-labeled cRNA probes were made from 5 μg of total RNA by use of GeneChip® Expression 3' Amplification One-Cycle Target Labeling kit (Affymetrix)."	"Double-stranded cDNA and biotin-labeled cRNA probes were made from 5 μg of total RNA by use of GeneChip® Expression 3' Amplification One-Cycle Target Labeling kit (Affymetrix)."	"Double-stranded cDNA and biotin-labeled cRNA probes were made from 5 μg of total RNA by use of GeneChip® Expression 3' Amplification One-Cycle Target Labeling kit (Affymetrix)."	"Double-stranded cDNA and biotin-labeled cRNA probes were made from 5 μg of total RNA by use of GeneChip® Expression 3' Amplification One-Cycle Target Labeling kit (Affymetrix)."	"Double-stranded cDNA and biotin-labeled cRNA probes were made from 5 μg of total RNA by use of GeneChip® Expression 3' Amplification One-Cycle Target Labeling kit (Affymetrix)."	"Double-stranded cDNA and biotin-labeled cRNA probes were made from 5 μg of total RNA by use of GeneChip® Expression 3' Amplification One-Cycle Target Labeling kit (Affymetrix)."	"Double-stranded cDNA and biotin-labeled cRNA probes were made from 5 μg of total RNA by use of GeneChip® Expression 3' Amplification One-Cycle Target Labeling kit (Affymetrix)."	"Double-stranded cDNA and biotin-labeled cRNA probes were made from 5 μg of total RNA by use of GeneChip® Expression 3' Amplification One-Cycle Target Labeling kit (Affymetrix)."	"Double-stranded cDNA and biotin-labeled cRNA probes were made from 5 μg of total RNA by use of GeneChip® Expression 3' Amplification One-Cycle Target Labeling kit (Affymetrix)."	"Double-stranded cDNA and biotin-labeled cRNA probes were made from 5 μg of total RNA by use of GeneChip® Expression 3' Amplification One-Cycle Target Labeling kit (Affymetrix)."
!Sample_taxid_ch1	"9606"	"9606"	"9606"	"9606"	"9606"	"9606"	"9606"	"9606"	"9606"	"9606"	"9606"	"9606"	"9606"	"9606"	"9606"	"9606"
!Sample_hyb_protocol	"The cRNA was hybridized to HG U133 plus 2.0 Arrays (Affymetrix) followed by washing and staining on the GeneChips Fluidics Station 450 (Affymetrix)"	"The cRNA was hybridized to HG U133 plus 2.0 Arrays (Affymetrix) followed by washing and staining on the GeneChips Fluidics Station 450 (Affymetrix)"	"The cRNA was hybridized to HG U133 plus 2.0 Arrays (Affymetrix) followed by washing and staining on the GeneChips Fluidics Station 450 (Affymetrix)"	"The cRNA was hybridized to HG U133 plus 2.0 Arrays (Affymetrix) followed by washing and staining on the GeneChips Fluidics Station 450 (Affymetrix)"	"The cRNA was hybridized to HG U133 plus 2.0 Arrays (Affymetrix) followed by washing and staining on the GeneChips Fluidics Station 450 (Affymetrix)"	"The cRNA was hybridized to HG U133 plus 2.0 Arrays (Affymetrix) followed by washing and staining on the GeneChips Fluidics Station 450 (Affymetrix)"	"The cRNA was hybridized to HG U133 plus 2.0 Arrays (Affymetrix) followed by washing and staining on the GeneChips Fluidics Station 450 (Affymetrix)"	"The cRNA was hybridized to HG U133 plus 2.0 Arrays (Affymetrix) followed by washing and staining on the GeneChips Fluidics Station 450 (Affymetrix)"	"The cRNA was hybridized to HG U133 plus 2.0 Arrays (Affymetrix) followed by washing and staining on the GeneChips Fluidics Station 450 (Affymetrix)"	"The cRNA was hybridized to HG U133 plus 2.0 Arrays (Affymetrix) followed by washing and staining on the GeneChips Fluidics Station 450 (Affymetrix)"	"The cRNA was hybridized to HG U133 plus 2.0 Arrays (Affymetrix) followed by washing and staining on the GeneChips Fluidics Station 450 (Affymetrix)"	"The cRNA was hybridized to HG U133 plus 2.0 Arrays (Affymetrix) followed by washing and staining on the GeneChips Fluidics Station 450 (Affymetrix)"	"The cRNA was hybridized to HG U133 plus 2.0 Arrays (Affymetrix) followed by washing and staining on the GeneChips Fluidics Station 450 (Affymetrix)"	"The cRNA was hybridized to HG U133 plus 2.0 Arrays (Affymetrix) followed by washing and staining on the GeneChips Fluidics Station 450 (Affymetrix)"	"The cRNA was hybridized to HG U133 plus 2.0 Arrays (Affymetrix) followed by washing and staining on the GeneChips Fluidics Station 450 (Affymetrix)"	"The cRNA was hybridized to HG U133 plus 2.0 Arrays (Affymetrix) followed by washing and staining on the GeneChips Fluidics Station 450 (Affymetrix)"
!Sample_scan_protocol	"Signal intensities were detected by  Affymetrix GeneChip Scanner 3000"	"Signal intensities were detected by  Affymetrix GeneChip Scanner 3000"	"Signal intensities were detected by  Affymetrix GeneChip Scanner 3000"	"Signal intensities were detected by  Affymetrix GeneChip Scanner 3000"	"Signal intensities were detected by  Affymetrix GeneChip Scanner 3000"	"Signal intensities were detected by  Affymetrix GeneChip Scanner 3000"	"Signal intensities were detected by  Affymetrix GeneChip Scanner 3000"	"Signal intensities were detected by  Affymetrix GeneChip Scanner 3000"	"Signal intensities were detected by  Affymetrix GeneChip Scanner 3000"	"Signal intensities were detected by  Affymetrix GeneChip Scanner 3000"	"Signal intensities were detected by  Affymetrix GeneChip Scanner 3000"	"Signal intensities were detected by  Affymetrix GeneChip Scanner 3000"	"Signal intensities were detected by  Affymetrix GeneChip Scanner 3000"	"Signal intensities were detected by  Affymetrix GeneChip Scanner 3000"	"Signal intensities were detected by  Affymetrix GeneChip Scanner 3000"	"Signal intensities were detected by  Affymetrix GeneChip Scanner 3000"
!Sample_data_processing	"The scanned images were processed using GCOS 1.4 (Affymetrix) according to the manufacturer. The resulting data sets (CEL files) were imported into ArrayAssist Expression Software (v5.2.0;Iobion Informatics LLC) and normalized using the PLIER algorithm in Array Assist to calculate relative signal values for each probe set."	"The scanned images were processed using GCOS 1.4 (Affymetrix) according to the manufacturer. The resulting data sets (CEL files) were imported into ArrayAssist Expression Software (v5.2.0;Iobion Informatics LLC) and normalized using the PLIER algorithm in Array Assist to calculate relative signal values for each probe set."	"The scanned images were processed using GCOS 1.4 (Affymetrix) according to the manufacturer. The resulting data sets (CEL files) were imported into ArrayAssist Expression Software (v5.2.0;Iobion Informatics LLC) and normalized using the PLIER algorithm in Array Assist to calculate relative signal values for each probe set."	"The scanned images were processed using GCOS 1.4 (Affymetrix) according to the manufacturer. The resulting data sets (CEL files) were imported into ArrayAssist Expression Software (v5.2.0;Iobion Informatics LLC) and normalized using the PLIER algorithm in Array Assist to calculate relative signal values for each probe set."	"The scanned images were processed using GCOS 1.4 (Affymetrix) according to the manufacturer. The resulting data sets (CEL files) were imported into ArrayAssist Expression Software (v5.2.0;Iobion Informatics LLC) and normalized using the PLIER algorithm in Array Assist to calculate relative signal values for each probe set."	"The scanned images were processed using GCOS 1.4 (Affymetrix) according to the manufacturer. The resulting data sets (CEL files) were imported into ArrayAssist Expression Software (v5.2.0;Iobion Informatics LLC) and normalized using the PLIER algorithm in Array Assist to calculate relative signal values for each probe set."	"The scanned images were processed using GCOS 1.4 (Affymetrix) according to the manufacturer. The resulting data sets (CEL files) were imported into ArrayAssist Expression Software (v5.2.0;Iobion Informatics LLC) and normalized using the PLIER algorithm in Array Assist to calculate relative signal values for each probe set."	"The scanned images were processed using GCOS 1.4 (Affymetrix) according to the manufacturer. The resulting data sets (CEL files) were imported into ArrayAssist Expression Software (v5.2.0;Iobion Informatics LLC) and normalized using the PLIER algorithm in Array Assist to calculate relative signal values for each probe set."	"The scanned images were processed using GCOS 1.4 (Affymetrix) according to the manufacturer. The resulting data sets (CEL files) were imported into ArrayAssist Expression Software (v5.2.0;Iobion Informatics LLC) and normalized using the PLIER algorithm in Array Assist to calculate relative signal values for each probe set."	"The scanned images were processed using GCOS 1.4 (Affymetrix) according to the manufacturer. The resulting data sets (CEL files) were imported into ArrayAssist Expression Software (v5.2.0;Iobion Informatics LLC) and normalized using the PLIER algorithm in Array Assist to calculate relative signal values for each probe set."	"The scanned images were processed using GCOS 1.4 (Affymetrix) according to the manufacturer. The resulting data sets (CEL files) were imported into ArrayAssist Expression Software (v5.2.0;Iobion Informatics LLC) and normalized using the PLIER algorithm in Array Assist to calculate relative signal values for each probe set."	"The scanned images were processed using GCOS 1.4 (Affymetrix) according to the manufacturer. The resulting data sets (CEL files) were imported into ArrayAssist Expression Software (v5.2.0;Iobion Informatics LLC) and normalized using the PLIER algorithm in Array Assist to calculate relative signal values for each probe set."	"The scanned images were processed using GCOS 1.4 (Affymetrix) according to the manufacturer. The resulting data sets (CEL files) were imported into ArrayAssist Expression Software (v5.2.0;Iobion Informatics LLC) and normalized using the PLIER algorithm in Array Assist to calculate relative signal values for each probe set."	"The scanned images were processed using GCOS 1.4 (Affymetrix) according to the manufacturer. The resulting data sets (CEL files) were imported into ArrayAssist Expression Software (v5.2.0;Iobion Informatics LLC) and normalized using the PLIER algorithm in Array Assist to calculate relative signal values for each probe set."	"The scanned images were processed using GCOS 1.4 (Affymetrix) according to the manufacturer. The resulting data sets (CEL files) were imported into ArrayAssist Expression Software (v5.2.0;Iobion Informatics LLC) and normalized using the PLIER algorithm in Array Assist to calculate relative signal values for each probe set."	"The scanned images were processed using GCOS 1.4 (Affymetrix) according to the manufacturer. The resulting data sets (CEL files) were imported into ArrayAssist Expression Software (v5.2.0;Iobion Informatics LLC) and normalized using the PLIER algorithm in Array Assist to calculate relative signal values for each probe set."
!Sample_platform_id	"GPL6244"	"GPL6244"	"GPL6244"	"GPL6244"	"GPL6244"	"GPL6244"	"GPL6244"	"GPL6244"	"GPL6244"	"GPL6244"	"GPL6244"	"GPL6244"	"GPL6244"	"GPL6244"	"GPL6244"	"GPL6244"
!Sample_contact_name	"Tove,,Lekva"	"Tove,,Lekva"	"Tove,,Lekva"	"Tove,,Lekva"	"Tove,,Lekva"	"Tove,,Lekva"	"Tove,,Lekva"	"Tove,,Lekva"	"Tove,,Lekva"	"Tove,,Lekva"	"Tove,,Lekva"	"Tove,,Lekva"	"Tove,,Lekva"	"Tove,,Lekva"	"Tove,,Lekva"	"Tove,,Lekva"
!Sample_contact_email	"tove.lekva@medisin.uio.no, tove.lekva@ous-hf.no"	"tove.lekva@medisin.uio.no, tove.lekva@ous-hf.no"	"tove.lekva@medisin.uio.no, tove.lekva@ous-hf.no"	"tove.lekva@medisin.uio.no, tove.lekva@ous-hf.no"	"tove.lekva@medisin.uio.no, tove.lekva@ous-hf.no"	"tove.lekva@medisin.uio.no, tove.lekva@ous-hf.no"	"tove.lekva@medisin.uio.no, tove.lekva@ous-hf.no"	"tove.lekva@medisin.uio.no, tove.lekva@ous-hf.no"	"tove.lekva@medisin.uio.no, tove.lekva@ous-hf.no"	"tove.lekva@medisin.uio.no, tove.lekva@ous-hf.no"	"tove.lekva@medisin.uio.no, tove.lekva@ous-hf.no"	"tove.lekva@medisin.uio.no, tove.lekva@ous-hf.no"	"tove.lekva@medisin.uio.no, tove.lekva@ous-hf.no"	"tove.lekva@medisin.uio.no, tove.lekva@ous-hf.no"	"tove.lekva@medisin.uio.no, tove.lekva@ous-hf.no"	"tove.lekva@medisin.uio.no, tove.lekva@ous-hf.no"
!Sample_contact_department	"Section of Specialized Endocrinology and Institute for Internal Medicine"	"Section of Specialized Endocrinology and Institute for Internal Medicine"	"Section of Specialized Endocrinology and Institute for Internal Medicine"	"Section of Specialized Endocrinology and Institute for Internal Medicine"	"Section of Specialized Endocrinology and Institute for Internal Medicine"	"Section of Specialized Endocrinology and Institute for Internal Medicine"	"Section of Specialized Endocrinology and Institute for Internal Medicine"	"Section of Specialized Endocrinology and Institute for Internal Medicine"	"Section of Specialized Endocrinology and Institute for Internal Medicine"	"Section of Specialized Endocrinology and Institute for Internal Medicine"	"Section of Specialized Endocrinology and Institute for Internal Medicine"	"Section of Specialized Endocrinology and Institute for Internal Medicine"	"Section of Specialized Endocrinology and Institute for Internal Medicine"	"Section of Specialized Endocrinology and Institute for Internal Medicine"	"Section of Specialized Endocrinology and Institute for Internal Medicine"	"Section of Specialized Endocrinology and Institute for Internal Medicine"
!Sample_contact_institute	"OUS-HF, Rikshospitalet"	"OUS-HF, Rikshospitalet"	"OUS-HF, Rikshospitalet"	"OUS-HF, Rikshospitalet"	"OUS-HF, Rikshospitalet"	"OUS-HF, Rikshospitalet"	"OUS-HF, Rikshospitalet"	"OUS-HF, Rikshospitalet"	"OUS-HF, Rikshospitalet"	"OUS-HF, Rikshospitalet"	"OUS-HF, Rikshospitalet"	"OUS-HF, Rikshospitalet"	"OUS-HF, Rikshospitalet"	"OUS-HF, Rikshospitalet"	"OUS-HF, Rikshospitalet"	"OUS-HF, Rikshospitalet"
!Sample_contact_address	"Sognsvannsveien 20"	"Sognsvannsveien 20"	"Sognsvannsveien 20"	"Sognsvannsveien 20"	"Sognsvannsveien 20"	"Sognsvannsveien 20"	"Sognsvannsveien 20"	"Sognsvannsveien 20"	"Sognsvannsveien 20"	"Sognsvannsveien 20"	"Sognsvannsveien 20"	"Sognsvannsveien 20"	"Sognsvannsveien 20"	"Sognsvannsveien 20"	"Sognsvannsveien 20"	"Sognsvannsveien 20"
!Sample_contact_city	"Oslo"	"Oslo"	"Oslo"	"Oslo"	"Oslo"	"Oslo"	"Oslo"	"Oslo"	"Oslo"	"Oslo"	"Oslo"	"Oslo"	"Oslo"	"Oslo"	"Oslo"	"Oslo"
!Sample_contact_zip/postal_code	"0027"	"0027"	"0027"	"0027"	"0027"	"0027"	"0027"	"0027"	"0027"	"0027"	"0027"	"0027"	"0027"	"0027"	"0027"	"0027"
!Sample_contact_country	"Norway"	"Norway"	"Norway"	"Norway"	"Norway"	"Norway"	"Norway"	"Norway"	"Norway"	"Norway"	"Norway"	"Norway"	"Norway"	"Norway"	"Norway"	"Norway"
!Sample_supplementary_file	"ftp://ftp.ncbi.nlm.nih.gov/geo/samples/GSM1128nnn/GSM1128550/suppl/GSM1128550_153.ga.cel.gz"	"ftp://ftp.ncbi.nlm.nih.gov/geo/samples/GSM1128nnn/GSM1128551/suppl/GSM1128551_185.ga.cel.gz"	"ftp://ftp.ncbi.nlm.nih.gov/geo/samples/GSM1128nnn/GSM1128552/suppl/GSM1128552_192.ga.cel.gz"	"ftp://ftp.ncbi.nlm.nih.gov/geo/samples/GSM1128nnn/GSM1128553/suppl/GSM1128553_253.ga.cel.gz"	"ftp://ftp.ncbi.nlm.nih.gov/geo/samples/GSM1128nnn/GSM1128554/suppl/GSM1128554_273.ga.cel.gz"	"ftp://ftp.ncbi.nlm.nih.gov/geo/samples/GSM1128nnn/GSM1128555/suppl/GSM1128555_276.ga.cel.gz"	"ftp://ftp.ncbi.nlm.nih.gov/geo/samples/GSM1128nnn/GSM1128556/suppl/GSM1128556_280.ga.cel.gz"	"ftp://ftp.ncbi.nlm.nih.gov/geo/samples/GSM1128nnn/GSM1128557/suppl/GSM1128557_291.ga.cel.gz"	"ftp://ftp.ncbi.nlm.nih.gov/geo/samples/GSM1128nnn/GSM1128558/suppl/GSM1128558_320.ga.cel.gz"	"ftp://ftp.ncbi.nlm.nih.gov/geo/samples/GSM1128nnn/GSM1128559/suppl/GSM1128559_321.ga.cel.gz"	"ftp://ftp.ncbi.nlm.nih.gov/geo/samples/GSM1128nnn/GSM1128560/suppl/GSM1128560_323.ga.cel.gz"	"ftp://ftp.ncbi.nlm.nih.gov/geo/samples/GSM1128nnn/GSM1128561/suppl/GSM1128561_328.ga.cel.gz"	"ftp://ftp.ncbi.nlm.nih.gov/geo/samples/GSM1128nnn/GSM1128562/suppl/GSM1128562_329.ga.cel.gz"	"ftp://ftp.ncbi.nlm.nih.gov/geo/samples/GSM1128nnn/GSM1128563/suppl/GSM1128563_330.ga.cel.gz"	"ftp://ftp.ncbi.nlm.nih.gov/geo/samples/GSM1128nnn/GSM1128564/suppl/GSM1128564_331.ga.cel.gz"	"ftp://ftp.ncbi.nlm.nih.gov/geo/samples/GSM1128nnn/GSM1128565/suppl/GSM1128565_343.ga.cel.gz"
!Sample_data_row_count	"33297"	"33297"	"33297"	"33297"	"33297"	"33297"	"33297"	"33297"	"33297"	"33297"	"33297"	"33297"	"33297"	"33297"	"33297"	"33297"
!series_matrix_table_begin
"ID_REF"	"GSM1128550"	"GSM1128551"	"GSM1128552"	"GSM1128553"	"GSM1128554"	"GSM1128555"	"GSM1128556"	"GSM1128557"	"GSM1128558"	"GSM1128559"	"GSM1128560"	"GSM1128561"	"GSM1128562"	"GSM1128563"	"GSM1128564"	"GSM1128565"
7892501	4.14354	3.58803	4.5269	3.45369	4.77123	3.83153	4.99119	4.86478	3.99226	6.17084	3.18546	5.48753	6.49654	4.6384	5.86883	4.71075
7892502	4.64975	4.52105	4.69263	4.45153	4.97524	4.33667	5.09051	4.98844	4.27943	4.45531	4.42872	4.28722	4.69903	5.05856	5.10045	4.52057
7892503	3.39883	3.387	3.31712	3.39018	3.02405	3.56986	3.5522	4.53252	4.37428	3.47667	4.30758	3.44038	4.70146	3.61319	3.47891	3.65432
7892504	7.99385	8.43476	8.43396	8.57048	8.82787	8.16727	7.85313	7.92509	8.26238	8.24377	8.85158	7.94915	8.44491	8.53584	8.2351	8.35427
7892505	3.29874	3.05586	2.97934	2.74745	2.84296	3.05265	3.42328	3.04855	2.87647	3.0676	4.54425	3.15553	3.07149	3.31375	3.29561	3.11667
7892506	4.13894	3.60656	3.80697	3.41444	3.82299	3.7025	3.30038	3.53555	3.47105	3.60884	3.47639	3.94273	4.08096	3.68509	3.87041	3.66979
7892507	4.65479	4.17129	5.47212	4.48073	4.75189	4.50939	4.95744	5.29888	6.97697	5.80135	4.92172	5.6464	5.15199	5.1676	4.54482	5.38363
7892508	6.70768	4.68744	6.46216	7.00317	6.85597	5.60666	7.08327	6.82621	5.38944	7.05664	4.21739	6.71501	5.86859	6.13302	7.58001	6.74067
7892509	10.3562	10.3061	10.9141	10.4073	10.6979	10.5807	10.7231	10.3071	10.3827	11.0182	10.7326	10.9962	10.7408	10.4661	10.9091	10.7941
7892510	5.05827	3.40365	4.09268	3.8091	4.42144	4.57792	4.13402	4.02048	3.48426	4.50091	3.75094	4.58736	3.99833	5.9388	4.26006	4.11331
7892511	4.43589	4.13875	4.79719	4.61375	4.53463	4.42876	4.32954	3.91169	4.66966	3.94181	3.94219	5.11255	4.20421	4.46917	4.36751	4.46421
7892512	6.16368	5.95228	6.11584	5.92654	6.23926	5.73067	5.79088	5.58753	6.38805	5.96202	6.55182	6.57147	6.46587	6.01394	5.8434	6.49331
7892513	4.36728	3.80719	3.96051	4.04308	4.06639	3.44177	4.2706	3.48573	3.61251	4.32049	3.02709	4.10198	4.58375	3.7228	3.78014	4.0397
7892514	10.4311	10.1682	10.0923	10.6586	10.2592	10.2166	10.2151	10.6308	9.18779	10.2623	8.78409	10.3391	10.668	10.0789	10.3713	10.406
7892515	9.04208	8.97032	8.90913	8.93781	8.81401	8.88345	8.17197	8.56194	7.80771	8.63373	8.63353	8.50226	8.64165	8.62209	8.7859	8.8534
7892516	3.11595	2.74059	2.85639	2.97827	2.85271	2.81795	2.92576	3.1827	2.89901	3.03614	2.8839	2.87284	2.94926	3.14482	3.01169	2.94436
7892517	6.72871	6.42269	6.13479	6.39215	7.03945	6.1357	7.71757	7.01559	4.55157	7.95188	5.07032	6.46193	6.49199	7.0548	6.7326	6.95608
7892518	3.13509	2.94644	3.17254	3.18784	3.02367	3.44962	3.40987	3.26002	4.81775	2.87412	3.2643	3.15214	3.00978	3.18474	3.1253	3.3996
7892519	4.8984	4.98082	5.11236	5.06931	4.93833	5.1431	4.67612	4.90103	5.73034	4.86676	5.16005	4.71305	4.61482	5.06999	4.70892	5.36633
7892520	9.04947	7.93287	7.85164	8.88738	9.36934	8.85407	8.66349	8.9881	8.23391	8.87109	8.8394	8.96266	7.64391	8.67352	8.79546	8.55883
7892521	8.83935	8.22173	8.71642	8.08938	8.26568	8.61804	7.97345	8.39239	7.42697	8.41191	7.86796	8.756	8.71468	7.9211	8.40237	9.06622
7892522	5.66613	5.50536	6.3465	5.80061	5.80743	5.30179	5.61976	5.44817	6.25726	5.6048	5.68905	5.88658	6.23214	6.07244	5.99652	5.99662
7892524	7.08428	6.63531	6.06668	6.44937	6.54942	6.52077	7.07417	7.17129	5.10399	6.92238	6.13762	5.78456	6.02424	6.65763	7.00687	6.87073
7892525	5.24847	6.14703	5.88202	6.24708	6.1751	6.41695	5.78143	6.27036	5.69931	6.26961	6.24549	6.0564	5.39418	6.25024	5.69183	6.0086
7892526	5.39542	5.34401	5.35374	5.2952	5.76841	5.21913	6.12061	6.1057	4.35406	5.7545	4.66005	5.20871	5.58296	5.50481	6.14816	6.11893
7892527	7.78795	8.51227	7.74135	7.67895	8.01098	8.24295	8.29518	8.52689	7.0146	8.57484	7.77728	8.09068	8.16251	7.81387	8.1446	8.78648
7892528	2.80326	2.69278	2.54554	2.5867	2.84086	2.67014	2.64054	2.6986	2.60641	2.68504	2.58666	2.6919	2.59869	2.75169	2.78832	2.54598
7892529	6.30542	5.80226	5.73157	6.04782	6.18945	5.64669	5.946	5.93182	7.23783	5.8434	5.36571	6.27912	5.96903	6.65105	5.91334	5.62062
7892530	7.58315	8.11239	7.51287	7.57566	8.11866	7.26794	7.91878	7.72497	6.31605	7.97139	7.12323	8.0289	7.80653	7.59726	7.89744	8.18112
7892531	7.23108	6.82004	6.35764	6.28268	6.70743	6.81938	7.19396	6.70172	6.3586	6.73361	6.39834	6.37282	6.51041	6.53631	7.51528	6.95074
7892532	2.81979	2.89909	3.2651	3.01819	3.11221	3.13492	3.06233	2.90933	3.88901	3.68501	3.16927	2.991	3.10667	3.05768	3.19801	3.45122
7892533	6.34374	4.70693	5.85111	5.67279	6.54355	6.15022	6.15132	6.03057	6.52115	5.3892	5.87419	5.64744	5.94958	6.05905	5.90717	6.15734
7892534	5.94356	5.12885	5.61197	4.49412	6.7099	5.44664	6.1687	6.33667	4.0386	7.12726	5.36998	5.65831	6.39093	5.08169	5.74101	5.76043
7892535	5.43054	3.85774	5.13125	5.71844	6.19036	5.9216	5.52162	6.19344	4.88701	6.01525	4.91716	5.50283	4.89986	4.96945	4.54155	4.38474
7892536	10.0125	10.8469	10.8605	10.1483	10.2686	10.1443	10.2129	9.90449	9.62203	10.6457	10.6385	10.7959	10.7914	10.4658	10.5851	10.6252
7892537	3.15813	2.83983	2.8958	3.08273	3.14903	3.17395	3.07236	3.29395	2.98054	3.01869	3.24654	2.908	2.94875	2.90661	3.38057	2.67698
7892538	5.6842	3.73643	4.38832	4.71162	5.78116	5.8655	5.03783	5.88234	4.86086	5.53771	4.49985	5.40384	3.96035	5.24578	5.50422	4.64654
7892539	6.54297	5.778	5.45815	4.824	5.87852	5.93707	6.03052	6.0179	5.25503	5.86477	3.94367	6.65887	5.13751	6.05469	6.27134	6.13192
7892540	5.86773	4.90254	5.43648	5.49345	4.38165	5.81686	5.78988	5.92084	7.09926	5.96999	4.19122	6.62942	6.22165	6.10236	5.99932	6.06761
7892541	9.82898	10.3291	10.2547	10.0209	10.0755	10.0146	10.0939	9.94377	9.78408	10.0806	10.0195	10.0699	10.3981	10.1579	10.1446	10.3274
7892542	8.52302	8.78999	9.8113	9.37108	9.42108	9.05626	9.55417	9.00508	10.0529	10.034	9.60082	9.88344	9.55568	9.28179	9.70281	9.17734
7892543	6.18727	5.53856	5.62997	5.47184	5.25354	5.50571	6.00181	5.69465	4.50873	5.95757	5.61669	5.32784	4.88661	5.57669	5.59887	5.49419
7892544	3.66644	4.88381	4.13202	4.28347	4.49859	4.01436	3.7165	4.57434	4.6406	4.09159	4.61825	4.02889	4.06744	4.05257	4.52213	4.45622
7892545	5.6188	4.45823	5.15842	4.91646	5.40114	5.14083	5.05408	4.93542	6.45171	5.39388	5.1357	4.5696	5.6151	5.50321	4.53599	5.36388
7892547	4.57435	4.47845	4.39607	4.2906	4.25734	4.66267	4.2306	4.30025	6.00038	4.93145	4.45215	4.54592	4.55344	4.62108	4.76827	4.48827
7892548	8.78745	8.28814	8.37311	8.10824	8.11939	8.55004	7.94296	8.0603	7.12477	8.21833	7.30996	8.7459	8.54202	7.93198	7.95838	9.07128
7892549	5.92027	5.24568	5.7568	5.73096	4.76589	4.65436	5.53313	5.67806	5.75097	4.83692	4.49044	5.53519	5.55769	5.18977	5.66536	5.59145
7892550	6.27641	5.83796	6.34737	6.42869	6.52099	6.68617	5.88259	6.23477	7.52502	6.79604	6.96317	6.7446	6.23293	7.04912	6.77777	6.94193
7892551	10.0326	9.20708	9.35421	9.91989	10.4734	10.2143	10.0504	10.0797	9.1274	9.89573	9.81188	9.98774	9.04299	10.0196	10.1075	9.89086
7892552	3.52097	3.94878	3.94714	3.24846	4.20383	3.8149	3.90338	3.45403	3.80528	3.78275	3.16857	4.06299	3.39763	3.66805	4.24938	4.03664
7892553	3.86631	3.04126	3.76817	3.82015	3.5764	4.00934	3.60291	3.42318	3.19648	4.00355	3.34904	3.4114	3.42604	4.09722	3.78568	3.33874
7892554	5.23384	4.24112	3.98134	3.5096	4.31792	4.12445	4.03731	4.0277	3.44086	3.58651	3.35182	3.83269	3.70396	3.86886	4.01888	4.21152
7892555	7.9924	7.86796	7.20719	6.8633	7.49079	7.24516	7.27351	7.89685	5.00014	7.90607	4.78706	6.70306	7.21628	7.28057	8.09528	7.66929
7892556	11.7822	11.6853	11.7568	11.6391	11.7217	11.6179	11.8219	11.7853	11.2414	11.8748	11.5924	11.7995	11.5368	11.6981	11.8968	11.6277
7892557	4.15469	4.72257	4.62681	4.59976	3.98646	3.56666	3.88052	3.93682	4.03895	3.47709	4.38225	4.88864	3.80167	3.88199	3.40955	5.90517
7892558	4.14472	4.10452	3.74829	3.97588	4.35019	4.619	4.66521	4.00308	5.29972	3.74586	4.3587	4.29505	3.94434	3.85075	4.4032	4.51284
7892559	5.36663	5.58762	5.59526	6.12642	5.24528	5.56577	5.24079	5.80032	4.97872	5.78735	6.53304	5.07081	5.58846	5.79354	5.03613	5.53245
7892560	4.24468	4.73442	4.67522	4.41396	5.11145	4.5864	4.3637	4.42662	3.95572	4.06329	4.24552	4.83344	4.36503	4.49671	4.79554	5.19146
7892561	10.3896	10.7614	10.4917	10.5265	10.438	10.5421	10.6178	10.791	10.0842	10.7019	10.5272	10.3684	11.0347	10.7918	10.3588	10.2866
7892562	7.84996	6.86897	7.28567	7.37642	7.02078	7.07816	7.95912	7.43031	6.36151	8.02431	7.10841	6.87531	7.16922	7.74353	7.62854	7.25983
7892563	7.01915	6.9949	6.70499	7.10842	6.8162	6.87009	6.77852	7.11381	6.15314	7.21602	8.44398	6.933	6.76869	7.08051	7.15328	7.68435
7892564	9.1308	9.12683	10.1213	9.7066	9.49612	9.96614	9.78272	9.37089	9.89243	10.6856	10.4617	10.4519	10.1494	9.51892	9.85521	9.86338
7892565	6.98779	7.44829	6.56099	6.97609	6.82972	6.83482	7.10586	7.17272	6.39548	6.86625	5.67484	6.80118	6.26963	6.38463	6.71499	7.57923
7892566	3.63967	3.83314	4.43057	3.94329	3.76729	3.94827	4.87152	3.77099	4.0814	5.22891	3.8233	4.13836	4.82646	3.90829	4.90427	3.74357
7892567	5.32493	4.74038	5.35984	4.74137	5.3259	5.9717	4.67739	4.73747	6.08172	5.2298	5.91335	5.82205	5.8874	5.0211	5.21808	6.33749
7892568	10.1241	9.0546	10.7191	10.6552	10.0785	10.3005	9.95189	9.76844	10.4319	10.1622	10.6044	10.5209	10.4801	10.2493	10.5969	10.4196
7892569	6.77797	7.25415	7.18138	7.22114	7.28978	6.82364	7.45967	6.03367	7.98319	6.92035	6.60267	6.77885	7.71018	6.78594	6.85515	6.08959
7892570	6.38377	6.49743	6.63132	6.2143	6.9223	5.88955	6.65359	6.66162	5.93012	7.02276	6.18896	6.82668	6.98699	6.74641	6.40308	7.06583
7892571	3.79946	3.61708	3.88088	3.53716	3.55455	4.64436	4.32183	2.9708	4.11353	3.90798	2.56853	5.051	3.47153	3.36915	3.49367	3.99569
7892572	6.73634	4.80288	6.36748	6.92023	6.77753	4.99855	5.72317	6.02549	6.38084	6.11934	5.38635	6.0466	5.56747	5.60811	5.71475	5.43777
7892573	5.07222	4.87729	5.56597	5.6337	5.43424	5.07596	4.95126	4.69175	5.2621	5.78843	4.55885	5.24611	4.94045	5.24714	5.2261	5.25673
7892574	9.34011	9.95698	10.3144	9.71384	9.36883	9.64704	10.0507	9.22744	9.91194	9.38277	9.78839	10.3503	10.4054	10.1976	9.31853	9.37697
7892575	6.97513	6.04386	7.20783	7.17418	6.82081	6.55719	7.02446	6.09835	5.67433	7.145	4.53216	7.33095	7.11366	6.76314	7.08679	7.60462
7892576	4.20202	4.76204	5.09512	5.09869	5.23064	4.70714	4.68492	5.29846	6.05301	4.81957	4.37129	4.89726	5.3242	5.08894	4.47637	4.71125
7892577	3.80751	2.91335	2.82537	2.94703	3.09516	3.13561	3.24787	3.52914	2.92595	3.00636	3.03219	3.07112	3.34115	3.11471	3.35509	3.2375
7892578	4.42955	4.87758	4.28928	4.64261	4.29718	4.5032	4.56009	4.68297	5.10192	4.86328	4.17567	4.56273	4.52209	4.52457	4.40867	4.54777
7892579	8.18934	8.79475	8.84482	8.03889	8.45951	8.47221	8.85179	8.52193	8.3469	9.19571	8.86643	9.18824	9.01467	8.80634	8.56195	8.96211
7892580	2.99334	3.45669	3.13389	3.11285	3.27915	3.47977	3.22052	3.52045	3.7559	3.5756	3.51811	3.00811	3.39552	3.11025	3.33245	3.19673
7892581	4.66787	3.34905	3.95154	3.94656	4.84396	4.11154	4.65139	4.99567	3.69255	5.21299	2.83341	4.52905	3.53049	3.83453	3.76546	4.16794
7892582	3.96	3.32649	3.45006	3.23827	3.51488	3.52995	3.92428	4.00183	3.78105	3.45133	3.34808	3.59531	3.4361	3.50577	3.62125	3.55357
7892583	5.14287	5.30792	4.50017	4.84621	4.78464	4.63965	5.15267	4.50941	4.59671	5.06966	4.35745	5.24052	4.69053	4.7458	5.15607	5.17126
7892584	6.04468	5.52946	6.12843	5.86228	6.29187	5.81283	5.32478	5.8275	6.7599	5.53571	5.35311	5.56914	5.24957	5.65426	5.72116	5.70497
7892585	4.40777	3.71065	4.00622	3.43269	4.47069	3.91471	3.83116	4.77449	7.02946	4.29254	3.49986	4.01952	4.59797	4.0163	3.79447	3.82899
7892586	3.84029	3.03292	3.26775	2.8707	3.38113	3.48027	3.35462	3.45138	2.94089	3.27425	3.20158	3.15974	3.25782	3.25581	3.41281	3.26779
7892587	4.15003	3.32176	3.91313	3.94696	4.93599	3.97163	4.56483	3.94437	3.94728	4.59546	3.36794	4.19449	3.4865	4.38462	4.53833	4.35377
7892588	2.81241	2.62413	2.78054	2.73246	2.9733	2.80198	2.59528	2.68756	2.79274	2.61671	2.74106	2.63582	2.68993	2.75435	2.69313	3.0473
7892589	5.50479	6.79644	6.1837	4.85986	6.5682	6.31543	6.296	6.36593	6.67193	8.08558	5.92676	6.39782	6.86031	6.31271	6.30768	6.80118
7892590	5.59809	3.89009	3.52342	3.19141	3.29995	3.38822	3.87094	4.9093	3.11916	4.21363	3.18817	3.91161	3.67585	3.58087	2.85002	4.32719
7892591	3.00006	3.03362	3.09859	2.77977	3.17381	3.09407	3.1807	3.05632	5.47688	2.83725	2.87093	3.11112	3.29007	2.75949	3.34485	2.89179
7892592	5.96204	5.17348	5.70432	5.51672	5.93266	5.98012	5.41402	5.59799	4.83089	5.45814	4.68046	5.92484	5.45425	5.69434	5.73119	5.7148
7892593	4.40316	3.83741	3.72838	3.384	4.00536	3.91977	3.88872	3.83412	9.69899	4.22942	4.10159	3.90048	3.78645	4.13243	3.97419	3.47971
7892594	4.74101	3.73135	3.67041	3.87823	3.85205	4.0583	4.15184	4.42541	3.61203	4.04275	2.9817	3.20135	3.48037	4.04706	3.76464	4.13822
7892595	4.80435	4.15773	4.38235	4.14912	4.47016	4.71536	4.50479	3.94701	4.00361	5.17042	3.7597	4.5197	4.29732	4.62987	5.19698	4.67724
7892596	4.4055	4.36364	4.18828	3.97654	4.33254	3.96166	4.40155	4.15853	4.03376	4.38633	4.21586	4.04686	4.27656	4.42569	4.50405	4.08896
7892597	5.92876	5.26975	5.45379	5.36191	5.4006	5.31975	5.19025	5.8729	4.54786	5.75496	5.51397	5.83348	4.54812	5.92385	5.23355	5.53398
7892598	8.78116	9.13937	9.53441	9.08488	9.15936	9.43474	8.75875	9.44117	9.61256	8.95492	8.32297	9.59293	9.21707	8.83395	8.61865	9.26345
7892599	9.76305	9.93785	9.48261	9.58076	10.2507	9.51556	10.2964	9.65111	8.84352	9.73633	9.42669	9.81956	9.78381	10.0156	9.78605	9.72742
7892600	3.09405	3.07024	2.92979	3.0711	3.12113	2.98851	3.13481	3.24	3.30183	3.06893	3.05976	2.98164	3.19058	2.98282	2.75361	2.9982
7892601	4.1442	4.20924	4.21957	4.26806	4.12748	4.33979	4.06006	4.18952	4.51812	4.20378	4.73202	4.28453	4.2576	4.1984	4.0784	4.33998
7892602	3.58195	3.20793	3.13352	3.11955	3.12216	3.27011	3.57169	3.27257	2.86869	3.00295	2.90078	3.35488	3.24714	2.93326	2.81417	3.28897
7892603	4.70767	3.25021	3.33213	3.64334	4.1683	4.75098	4.31611	3.50165	3.69826	4.10708	3.00073	4.33336	3.32599	3.33704	3.40595	3.50596
7892604	4.8846	4.07379	4.52435	4.40129	4.10254	4.70806	5.353	3.8008	8.78972	4.82431	3.37331	4.76355	4.78603	4.48622	4.62468	4.69284
7892605	8.09669	7.53085	8.43462	8.06974	7.47446	7.78783	7.85475	6.85917	8.06357	7.20737	6.32445	8.00886	8.27994	7.67757	6.44657	7.3779
7892606	10.6514	8.78063	9.33145	10.422	11.0506	10.806	10.4832	10.7143	9.87549	10.7369	10.7945	10.4242	9.27821	10.7235	10.4815	9.84114
7892608	8.23194	5.8703	6.54974	7.3995	8.57434	8.17428	7.76762	7.99263	6.97747	7.80554	7.59275	7.76712	6.27707	7.92849	8.02647	7.20363
7892609	4.95988	4.39986	4.74705	3.33473	3.84769	4.86279	4.00978	3.32692	7.64967	4.01787	4.4765	4.09253	6.29964	4.48089	3.9893	5.05579
7892610	5.72382	4.88454	6.57853	5.58712	6.39815	5.61389	6.58704	6.72701	4.65037	7.75818	5.82229	7.22016	8.46546	6.85553	7.48522	6.69498
7892611	2.74498	2.64524	2.65863	2.71326	2.76927	2.61026	2.67864	2.84722	2.89531	2.89061	2.58749	2.623	2.71271	2.67537	2.83948	2.66163
7892612	4.33948	2.76766	3.066	3.63194	4.8479	4.33519	4.46856	3.79763	3.38923	4.4428	2.82782	4.38161	2.90998	3.17245	4.12154	3.76387
7892613	9.45587	8.22434	8.33544	9.22107	9.61733	9.151	8.9548	9.25991	7.82996	9.4	9.31248	9.33194	7.93632	9.39443	9.15524	8.80197
7892614	3.92039	3.27989	3.20407	3.60203	2.89467	3.10114	3.10091	3.3263	3.27703	3.89303	3.61994	3.36785	3.65342	3.81031	3.44702	3.65471
7892615	4.42389	4.14037	4.22887	4.11466	4.96838	4.63836	4.46518	4.63583	4.12592	4.90878	4.17475	4.19489	4.63563	4.5983	4.92609	5.70549
7892616	3.76791	2.77726	2.68392	2.68055	2.9279	2.99635	2.88543	2.86839	2.9031	2.98944	2.7496	2.7506	2.7004	3.15568	2.88424	2.87358
7892617	11.8144	11.5821	11.5837	11.742	11.8777	11.4198	11.4346	11.5771	11.7649	11.423	11.4093	11.312	11.2251	11.4549	11.5035	11.8296
7892618	7.01919	6.19257	6.91032	6.56634	5.90873	6.86256	6.75448	6.67846	6.43919	7.10666	6.41516	7.05767	7.56927	7.17473	7.45925	6.99478
7892619	3.52473	3.23989	3.51842	3.66435	3.37991	3.39699	4.63949	3.77303	3.01226	3.21838	3.04763	3.12906	3.01109	3.65376	4.28378	3.56241
7892620	11.5083	11.4257	11.5143	11.4058	11.5162	11.5875	11.6093	11.4217	11.1162	11.506	11.2168	11.4103	11.4492	11.5457	11.4783	11.3982
7892621	11.1	10.5539	11.3576	11.4578	11.1555	11.2028	10.9523	11.2121	10.6472	11.3669	11.5162	11.2176	11.4887	11.2847	11.3036	11.1683
7892622	8.96725	8.9244	9.77357	9.58264	8.50977	9.21002	8.80769	9.37017	9.23601	8.46917	7.62472	9.60798	9.56133	8.23277	8.98095	9.36843
7892623	7.83365	8.86163	8.95194	8.77633	8.82865	8.16235	8.41089	7.84682	7.81238	8.63529	9.02703	8.3771	9.16209	8.82759	8.60194	7.50841
7892624	4.30846	3.74191	3.56259	3.84485	3.6247	3.91962	3.86477	4.13184	4.04326	4.07358	6.21475	4.88895	3.84016	4.02789	3.61578	3.95515
7892625	6.71821	6.82709	6.74492	6.83561	6.93184	6.3857	6.50788	7.04144	6.51798	7.16563	6.53618	6.22107	6.69184	6.77401	6.69735	6.59877
7892626	3.76417	3.79375	3.83559	3.77773	4.47031	4.12856	4.63652	5.05047	5.46196	4.88034	3.7144	3.32275	4.41392	4.16165	4.32203	4.18954
7892627	7.68845	7.45886	8.117	7.87792	7.60787	7.1532	7.70388	7.47471	8.37228	7.2437	7.70956	7.19871	7.8042	7.84417	6.66615	7.44634
7892628	6.81821	7.93962	8.49149	7.90472	8.16203	7.15834	8.42563	7.19851	6.77753	9.12947	9.14479	8.40863	9.04196	8.62807	7.45719	7.25546
7892629	5.20057	3.94161	4.34571	5.09133	4.00958	3.86592	4.99692	5.38946	3.02285	4.81657	3.38261	4.8722	4.87332	5.04695	5.23092	4.67257
7892630	9.48903	10.365	10.1486	9.88971	9.54799	9.27726	9.52214	9.16802	9.48652	8.9659	8.80576	10.0802	9.979	9.90526	8.93408	9.54313
7892631	2.65906	2.57493	2.68722	2.57326	2.61213	2.50908	2.60871	2.83834	2.66072	2.66533	2.51697	2.77425	2.45058	2.5258	2.72548	3.13712
7892632	3.90198	4.3719	4.24658	4.1778	4.15168	3.74232	4.38685	3.75198	3.53502	4.69887	3.84645	4.78013	4.156	4.26643	4.5654	4.48906
7892633	8.14875	7.9615	7.49357	7.47473	8.01042	7.79287	8.12595	8.39611	5.99621	8.34345	7.14691	7.51841	7.31909	7.76533	8.22901	8.28712
7892634	8.93428	7.30454	7.735	8.46038	9.16368	9.06434	8.43295	8.98494	7.78412	8.94101	8.64692	8.61162	7.26923	8.85211	8.64957	8.43452
7892635	6.78347	6.86936	7.09164	6.97601	7.15764	6.70283	6.66027	6.84832	8.07315	7.22515	7.21592	6.77497	7.0355	7.22317	6.8414	7.02008
7892636	7.95701	8.33167	8.29331	8.54918	8.49247	7.97446	6.95597	7.84023	8.02491	7.90123	7.63849	7.78886	7.77779	7.93842	7.90605	8.2311
7892637	6.47994	5.56163	6.09839	5.73709	6.51883	5.73458	6.41915	5.92499	5.48431	6.78591	6.23259	5.94057	6.381	5.95355	5.84593	5.95908
7892638	2.85424	2.65973	2.74281	2.77226	2.73342	2.76561	2.74319	2.75602	2.95364	2.78087	2.63454	2.92691	2.70245	2.65258	2.9069	2.93526
7892639	10.4544	11.2271	10.65	10.7514	10.9754	10.4897	10.8161	10.2682	9.91596	10.3061	10.6731	10.7693	10.2933	10.0611	10.3279	10.9763
7892640	11.5431	11.9088	12.0359	11.7355	11.6941	11.4406	11.7302	11.5989	11.1645	11.764	11.1629	11.7151	11.9637	11.8086	11.9565	11.8485
7892641	5.05275	5.53848	4.91814	4.56765	5.76569	5.20239	5.12092	5.39166	4.91067	5.07763	5.15518	5.78762	5.37771	5.56756	5.22545	5.62345
7892642	7.98173	6.89239	7.47732	8.02325	8.13773	8.4978	7.83287	8.51509	7.27274	8.40319	9.42809	8.32526	7.45668	8.51603	8.171	8.17658
7892643	8.1138	9.20292	7.85773	7.74075	8.21185	7.44997	8.69218	8.0951	6.95951	8.32036	7.71388	8.31473	8.98389	8.51857	7.98748	8.05804
7892644	7.914	7.35392	7.26291	7.20846	7.20237	6.7221	7.44241	7.5849	5.93391	7.61201	5.57754	7.05503	7.5301	7.64943	7.76077	7.11747
7892645	3.51823	3.11386	3.07851	3.14844	3.41765	3.79915	3.01047	3.64408	4.05365	3.31924	3.26688	3.57926	3.43602	3.42018	3.39785	3.49617
7892646	2.74798	2.74538	2.71853	2.78742	2.66473	2.67186	2.86858	2.64387	2.64109	2.84263	2.83432	2.73857	2.91716	2.64393	2.73073	2.74291
7892647	7.88941	4.28609	5.6352	6.19286	7.87401	7.98004	7.36854	7.24341	6.87312	8.25612	5.86399	7.96634	5.39962	7.1996	7.36466	7.3283
7892648	9.69323	9.60218	9.71465	9.40891	9.60933	9.34416	9.71791	9.71043	8.67766	9.08308	8.73299	9.51151	9.28686	9.00061	9.93629	9.70043
7892649	3.70872	3.58376	3.62754	3.66463	3.7167	3.65064	3.44147	3.81837	4.43435	3.99874	3.35484	3.84658	3.56517	3.57707	3.76959	3.91376
7892650	10.7938	11.5462	10.8911	10.8854	10.9748	10.8264	11.3883	11.1572	10.4034	11.3403	11.2472	11.0689	11.2299	11.3027	10.9667	10.764
7892651	3.41346	3.09866	3.25389	3.48031	3.34598	3.39653	3.23693	3.30573	3.00594	3.65327	3.32068	3.51138	3.29701	3.4795	3.22851	3.58719
7892652	10.1466	9.66327	10.5605	10.5294	10.7997	10.2899	10.7135	10.7391	10.3173	11.2896	11.0378	10.7506	10.8039	10.7641	10.8469	10.5752
7892653	3.40393	3.01085	3.36246	3.14767	3.09134	3.0264	2.96239	3.08923	2.84144	3.09829	3.57087	3.43603	3.04114	2.97491	2.92891	2.98035
7892654	9.07167	9.65657	9.45906	9.47464	9.53044	9.16753	8.40364	8.73227	8.6569	8.64752	8.64908	8.79863	9.49843	8.99644	8.50784	9.61136
7892655	3.1621	2.95008	3.09697	3.13955	3.20787	3.00907	3.42753	3.19386	4.31953	3.37615	3.2347	2.9955	3.042	3.05295	3.0048	2.91704
7892656	4.39766	3.62449	4.06778	3.8306	4.0116	3.90245	3.72803	4.28002	3.4382	4.44622	3.0032	4.42665	3.10025	4.16769	3.86633	3.83631
7892657	2.48135	2.77579	2.68462	2.57574	2.64241	2.67986	2.67031	2.74863	3.35807	2.87789	2.67735	2.86681	2.8437	2.88777	2.61193	2.63456
7892658	3.36643	3.78184	3.29839	3.06906	3.15382	3.21754	4.52321	2.9987	3.04604	3.07176	2.81866	3.21006	2.93144	3.38801	3.7975	3.43032
7892659	3.77379	3.46495	3.70717	3.59321	3.65176	3.75748	4.16991	3.30394	4.17846	4.36974	3.42536	4.33835	3.6519	4.02418	4.64859	3.9194
7892660	2.5426	2.52422	2.62826	2.43972	2.5552	2.67064	2.62045	2.64813	3.18038	2.69536	2.50472	2.65778	2.62215	2.58004	2.73323	2.51886
7892661	8.45926	8.91881	9.24536	8.6865	8.1228	8.90496	8.22842	8.29035	8.49937	8.91786	8.43027	9.18283	9.35834	9.04447	8.89286	8.89754
7892662	7.60858	7.91613	7.62648	8.00055	7.78848	7.59494	7.73984	7.49354	8.69436	7.4834	7.79492	7.90503	8.15201	7.63183	7.52742	7.806
7892663	10.8196	10.5091	11.2505	10.9485	10.6761	11.1738	10.3576	10.8043	11.4059	11.0434	10.5584	11.2782	11.3361	11.0856	10.6749	10.8592
7892664	5.9833	4.68311	5.14222	4.66325	5.69965	5.95025	5.6016	4.874	5.98334	6.33896	4.98966	5.18919	4.96893	5.80605	5.71654	6.12178
7892665	5.67073	5.1804	4.98064	5.4385	4.83973	5.26042	5.47126	6.00397	5.60293	6.64141	6.05018	5.24666	5.74938	5.35402	5.57542	5.60968
7892666	2.90561	2.99061	3.09081	2.94365	3.07505	3.30977	3.09147	3.11865	2.95952	2.99521	3.13514	3.04226	3.2333	2.98138	3.07877	3.15132
7892667	7.18168	6.89284	7.69649	7.80713	7.66294	7.25161	7.01882	7.35213	7.91572	7.38723	8.28351	7.43134	7.24428	7.89642	7.34634	7.08162
7892668	9.94709	10.0143	10.3833	9.7212	10.3537	10.1345	9.8778	10.4475	9.76125	10.3593	10.4262	10.4883	10.7356	10.0611	9.86446	10.035
7892669	6.58816	6.81403	6.63763	7.12181	7.70702	6.81917	6.14306	6.52809	5.91517	6.64251	6.39932	6.73098	6.35155	6.46125	6.3694	6.92791
7892670	6.87747	7.25732	7.57622	6.98847	6.82555	6.40193	7.09749	6.38352	7.8102	7.67938	6.4739	6.90467	7.87666	7.046	6.91129	6.94433
7892671	4.78827	3.98751	4.25515	4.04297	4.00779	4.18546	5.32493	4.97004	4.08969	4.89582	5.40314	4.55722	3.76555	3.71295	5.02079	5.04866
7892672	6.46236	3.52486	5.02944	5.7716	6.33903	6.22145	6.68242	5.41123	5.99452	6.07214	3.91331	6.99515	4.14372	4.64914	5.79938	6.03535
7892673	5.56557	4.25185	4.49984	4.95712	6.12327	5.73132	5.63464	4.99717	5.11955	5.43078	5.37656	5.44628	4.26475	5.9206	5.65592	4.60989
7892674	6.3172	6.57077	7.28773	6.75284	5.83377	6.78635	6.5192	6.13136	6.815	6.96511	7.70612	7.29173	7.38573	7.02625	7.33764	6.98406
7892675	7.29408	6.78516	6.72402	6.62431	5.64985	6.69305	7.61609	7.20418	5.71294	6.92412	4.34501	6.80494	6.77868	6.72484	7.63572	7.22321
7892676	3.291	3.32712	3.64039	3.16405	3.30118	3.05797	3.4246	3.26443	3.47728	3.49748	3.38488	3.36979	3.4073	3.28597	3.66784	3.27983
7892677	9.91023	8.50668	9.10995	9.77638	10.1747	9.98749	9.51517	9.70219	9.07807	9.8414	9.13733	9.47197	8.50852	9.70926	9.7721	9.18413
7892678	7.25758	7.78094	6.50381	6.84044	6.80362	5.5233	7.88132	7.75828	5.53462	7.44268	6.23678	6.26139	8.13413	7.59068	6.79529	6.35421
7892679	6.10886	5.03567	5.75078	5.70331	5.80748	4.98565	6.32984	6.38511	6.2146	6.24526	6.52321	5.93163	6.52027	6.45583	5.56063	5.06961
7892680	6.82591	7.43543	7.11459	7.23671	6.92794	7.14217	8.23612	7.70176	5.68928	8.29036	9.24687	7.6444	7.82726	7.72516	7.52792	7.80781
7892681	6.61088	6.71281	6.71493	6.75352	6.88793	6.14766	6.44276	6.70685	6.05481	6.49285	6.63381	6.79416	6.24613	6.29387	6.49755	7.05541
7892682	5.31356	6.33448	4.78689	4.31582	4.71181	4.11652	5.77172	4.97978	3.64579	6.01668	3.09411	5.01326	4.39011	4.21361	5.06683	5.41676
7892683	4.07968	3.79008	4.50556	3.93143	5.7723	5.40071	5.28584	3.80108	4.76979	5.96155	3.89332	6.35493	5.29585	4.20843	4.94292	5.59314
7892684	8.86148	7.99995	8.46087	8.70056	8.28307	8.53907	8.46525	8.49456	8.0691	8.07261	8.2647	8.40691	8.99468	8.47052	7.84388	8.54748
7892685	4.65586	4.49745	4.75301	4.92358	5.1034	4.64441	5.95636	5.15061	4.59053	6.62533	5.05527	5.11092	4.42479	4.58799	4.95426	5.50156
7892686	6.16458	6.43126	6.42996	6.77263	6.47221	6.27809	5.93504	6.40254	7.04739	6.26084	6.62316	6.49508	6.24237	6.46496	6.2617	6.31046
7892687	6.31991	4.09941	5.04555	5.07167	4.55081	5.78146	5.51442	5.77712	5.80984	6.1272	4.16622	5.87332	5.129	5.75517	5.67143	5.90067
7892688	5.94631	7.45984	6.78573	6.81584	7.77057	6.21277	7.62036	7.12181	5.62714	7.7332	6.00253	7.1078	6.62404	6.36977	7.74214	6.79113
7892689	4.93101	4.78522	4.67973	4.79137	4.76636	4.2632	4.60907	4.56864	4.48916	5.19756	4.99897	4.53732	4.70231	4.76741	5.00239	4.75064
7892690	3.25669	3.60754	3.34471	3.44881	3.11816	3.44164	3.45608	3.66545	5.14543	3.20729	3.63408	3.68029	3.59701	3.77171	3.57872	4.33663
7892691	2.93552	2.72495	2.73406	2.57847	2.63175	2.58615	2.79881	2.84791	2.49725	2.58523	2.59084	2.67309	2.46099	2.46279	2.47213	2.8716
7892692	8.26972	7.38501	7.17271	7.32814	7.8158	7.59766	7.99196	7.99379	6.15757	8.14178	7.1897	7.42395	7.02511	7.72423	7.81495	8.03188
7892693	7.09083	6.66601	6.97243	7.35608	7.80254	6.26138	6.95114	6.37243	6.1079	6.71247	6.53356	6.95007	6.27936	6.93091	7.01641	7.23528
7892694	7.03039	7.42491	8.29173	7.59311	7.54724	7.69265	8.14616	7.66568	7.93941	8.60619	7.39203	8.04606	7.70985	7.7333	7.68279	7.78544
7892695	6.10956	5.44966	5.49924	5.84153	5.66118	5.92041	5.56898	6.22138	6.01676	5.87148	6.02116	5.76097	6.02104	5.94368	5.8463	5.43741
7892696	5.66098	5.89254	5.92192	6.24115	6.62982	6.40666	5.89508	5.89757	6.88983	6.98668	6.57762	6.76936	5.86714	6.17327	6.25126	6.22292
7892697	5.62901	6.13329	6.29291	5.13571	5.68195	5.84596	5.8689	5.76348	5.66346	5.9095	4.84748	6.13608	5.91302	5.86115	6.20652	6.27809
7892698	2.57914	2.56405	2.57202	2.53716	2.55673	2.57508	2.60674	2.62679	2.753	2.57428	2.5711	2.56831	2.5925	2.56109	2.58587	2.5942
7892699	4.66675	5.40294	5.14131	4.53442	4.71362	4.69152	5.21536	4.76306	4.27469	4.60817	3.82448	5.14245	5.83427	4.72239	4.83794	4.81848
7892700	5.14397	4.89906	5.06656	4.80937	4.94954	4.77832	4.66032	4.55741	5.9366	5.1162	5.13618	4.81535	4.9278	4.98989	5.19754	5.11705
7892701	9.33813	8.98681	8.92733	9.13639	8.92457	9.85641	9.17088	9.2643	8.92352	8.72258	9.70163	8.82502	9.08495	8.95532	8.93373	9.16044
7892702	4.44028	4.34337	4.23495	4.41399	4.47817	4.18484	4.77933	4.6328	4.28942	5.04109	4.21519	4.4142	4.72416	4.54892	4.40601	4.09848
7892703	7.4737	7.28494	7.08431	6.89545	6.86758	7.29621	7.00199	7.15016	6.37508	7.27647	8.12615	7.10312	7.33881	7.1537	6.54407	7.01665
7892704	11.5912	11.3269	11.884	11.7154	11.3072	11.6124	11.2121	11.8478	11.9936	11.8298	11.6437	11.9935	11.9865	11.6914	11.4328	11.8277
7892705	7.78521	8.07522	7.89951	7.01161	7.21872	7.81644	7.55231	7.48609	7.07704	7.47218	6.83424	8.34134	7.95878	7.80736	7.01069	8.46378
7892706	7.26829	7.62434	7.17585	7.10182	7.82677	6.79163	7.18463	6.86036	5.1804	7.6972	6.14644	6.53842	7.06432	6.77736	7.02572	7.42253
7892707	9.71835	8.02853	8.57365	9.26497	9.81964	9.18049	9.48253	9.52986	9.78398	10.267	9.1603	9.26951	9.26406	9.60684	9.39965	9.68643
7892708	5.10675	3.76201	4.20339	4.41382	4.41197	4.29261	4.42398	4.13869	5.77415	4.15556	4.34548	4.66508	5.45031	4.02062	4.33165	4.83352
7892709	2.86097	2.58958	2.88431	2.92522	3.06151	2.82897	3.05599	2.89926	2.83466	2.87208	2.70228	2.6827	2.78268	2.92187	2.91698	3.09885
7892710	4.16204	3.91664	3.63303	3.26252	3.56401	3.67816	3.40826	3.75404	3.00514	3.27119	2.98313	4.03718	3.58691	3.41654	3.49685	3.88809
7892711	6.16367	3.16408	3.92848	5.11869	5.81322	4.6787	5.61503	5.63844	4.84254	6.10655	3.46788	5.67406	4.6499	5.56173	5.9031	4.24488
7892712	7.92207	7.99217	7.97372	8.00179	8.19035	7.60448	7.44513	7.02503	7.28268	7.44386	7.5657	7.39697	7.63132	7.38103	7.27225	7.37935
7892713	9.06376	8.81243	8.83254	9.10356	9.33685	8.97674	8.35841	8.27968	9.53342	8.78599	8.66787	8.76981	8.36877	8.76997	8.87435	9.09865
7892714	3.75923	3.53111	3.69077	3.47685	3.89204	3.95984	3.85158	3.69389	4.61753	3.95993	3.03711	4.76677	3.72032	3.7747	4.00747	4.22989
7892715	3.57555	3.43408	3.12705	3.59812	3.60168	3.07145	3.66148	3.61671	2.93412	3.23941	3.7898	3.29998	3.37468	3.30507	3.52613	4.0917
7892716	4.92343	4.02545	4.34646	4.20331	4.28327	4.38097	4.45754	5.17059	3.27116	5.27931	3.91313	4.69842	5.13682	4.55804	5.25846	4.95093
7892717	4.6898	4.36363	4.4376	4.60619	4.76514	4.24793	4.51944	4.32838	5.1466	5.29654	4.60398	4.67341	5.44181	5.40665	4.79827	4.22239
7892718	5.16091	4.84169	4.84802	4.44757	5.14884	4.4863	5.16322	4.60464	5.88413	5.13248	4.77614	4.18681	5.22071	5.18668	4.54886	4.45734
7892719	8.55274	6.68047	7.19155	8.44336	9.26067	8.50479	8.10959	8.69067	7.13767	8.50247	7.75876	8.4253	7.09634	8.58836	8.36427	7.4469
7892720	6.78652	7.47874	7.00416	7.20933	7.15592	6.8438	7.28097	7.19247	6.65029	7.33943	7.7843	7.36642	6.89565	7.27078	6.8794	6.65851
7892721	7.9332	6.91191	6.63128	7.8352	8.3645	7.95567	7.97186	8.06985	7.028	8.00464	7.78038	7.81476	6.61735	7.87178	7.8209	7.22773
7892722	2.87396	2.56153	2.58742	2.5121	2.53615	2.62212	2.69226	2.60426	2.65342	2.42789	2.77611	2.63005	2.53806	2.61063	2.52316	2.5333
7892723	3.18498	2.96358	3.04715	2.92974	3.46122	3.46993	4.37977	3.28316	2.74961	3.25948	2.7884	3.64858	2.92743	3.08423	2.98556	3.03124
7892724	5.22734	3.64072	4.31949	4.20907	3.42757	5.23044	5.80351	6.14075	5.66636	5.44079	4.14377	5.22639	4.76286	6.04595	5.87559	4.44563
7892725	4.54852	3.09996	3.81879	3.54757	3.4752	3.42418	3.56089	3.35361	3.36637	3.66143	2.62318	3.82121	3.38519	3.82075	4.1972	3.7185
7892726	4.94585	5.18113	5.17434	5.08516	4.75977	4.31998	4.50147	4.35705	3.96089	4.94897	5.08863	4.33128	4.60853	5.14547	4.88708	5.09566
7892727	4.766	3.41678	3.57007	3.42716	3.98678	4.24008	4.32719	4.70019	3.68222	4.52048	3.36854	3.85057	3.73235	4.38954	4.63329	3.60483
7892728	4.16959	4.03318	3.62372	3.32814	4.16946	3.68014	3.90418	3.92354	3.89247	4.02888	3.27756	3.5525	3.26379	3.60478	4.20454	3.47294
7892729	5.27429	4.74223	3.88294	4.22214	5.83277	4.83869	6.01316	4.10328	3.53093	5.20194	3.43863	5.06667	4.26884	4.64688	4.83881	5.51877
7892730	4.72336	3.12128	3.39105	3.39044	3.13073	3.74011	3.4654	3.06317	4.49197	3.68573	3.65268	3.02551	3.34079	3.91311	4.4553	3.29168
7892731	6.4034	6.79783	5.98	5.81565	6.52498	6.09972	7.16336	6.67402	4.50666	7.35609	4.51172	5.87792	6.3728	5.82541	5.83886	6.78161
7892732	5.86058	6.3256	7.69285	6.87493	7.41745	7.49812	5.73408	6.37347	6.95043	7.0908	7.49637	7.94395	7.50905	7.08868	7.40617	6.86993
7892733	5.69233	3.87718	3.95481	4.18753	4.02016	4.55167	4.14226	4.53718	6.94874	4.17917	3.93578	4.00292	3.78073	4.66839	4.27772	5.24314
7892734	5.22346	4.66927	4.76809	4.79396	5.39658	5.22749	6.23159	5.61813	4.64011	5.92864	4.74169	5.12921	4.88549	5.49383	5.43022	5.60625
7892735	4.12143	3.0529	3.91117	3.99008	5.03794	3.50287	4.51955	4.26996	3.17625	5.02457	2.84015	4.61683	3.48999	3.93736	3.89999	4.96503
7892736	4.99415	5.15751	5.83131	5.32119	5.70682	6.04582	5.45791	4.97796	4.62113	5.713	5.9057	5.37134	5.13347	5.67274	5.26112	5.03294
7892737	4.08397	3.47258	3.56676	3.35609	3.45663	3.68388	3.63857	3.36372	3.29385	4.28501	4.33789	3.7316	3.52739	3.72982	3.76372	3.65134
7892738	8.42369	7.80543	8.08288	7.4174	7.29023	7.64401	8.74055	7.95734	7.6684	8.18366	6.77027	8.17944	7.94944	8.46401	8.31345	8.37481
7892739	5.89162	5.43399	5.66132	5.25329	4.6887	4.95267	5.00099	5.8095	4.00535	5.44869	5.3141	4.95832	5.04285	5.0821	5.33475	5.62791
7892740	3.1178	3.02168	3.0532	3.01541	3.27372	3.07602	3.30981	3.66398	2.78635	3.60173	3.2575	2.92379	2.85135	3.84848	3.77674	3.41063
7892741	6.94505	7.7364	6.98864	6.86476	7.58511	6.90631	7.27654	7.06125	5.52302	7.48708	6.55571	6.99479	7.10296	6.84658	6.81372	7.26679
7892742	7.17221	7.58813	8.33312	7.63952	7.59392	7.75784	7.33837	7.50078	8.14395	7.73056	7.12414	8.31777	7.87417	7.57495	7.67217	7.62735
7892743	3.86091	3.07393	3.25324	2.74664	3.09371	3.28958	3.40161	3.35171	4.33485	3.23199	3.26776	3.42712	2.9815	3.80386	3.47003	3.57782
7892744	8.18764	6.28746	7.99835	8.56406	8.13847	7.59214	7.91294	7.68511	7.95737	7.84346	7.0388	8.97311	8.06094	7.64107	6.63819	8.33872
7892745	8.13508	8.04379	7.96177	7.75738	7.87029	7.61359	8.30439	8.17622	7.61073	8.49059	7.0689	7.98439	9.04251	8.07003	7.7972	7.94874
7892746	2.68172	2.79934	2.60727	2.68474	2.89774	2.86591	2.71482	2.69724	2.73617	2.6121	2.98051	2.61097	2.79651	2.73506	2.50783	2.64678
7892747	7.41225	7.34844	7.22027	7.41075	7.32277	6.56841	7.07237	7.50761	5.89579	7.06923	7.67837	7.04127	7.27805	7.32135	6.86786	7.09149
7892748	8.95278	7.34994	7.84362	8.73578	9.36169	8.81246	8.58836	8.8607	7.83819	8.7948	8.89447	8.8883	7.34883	8.84134	8.69267	8.33288
7892749	5.6103	5.67722	6.5831	5.45863	6.36287	5.99188	6.5014	5.40548	6.66394	6.9754	4.72106	7.24097	5.69631	6.07972	6.18258	6.72824
7892750	4.2193	4.27778	4.03327	4.14289	4.52678	4.66424	4.67579	4.8625	4.14988	4.26225	4.07441	4.2521	4.51441	4.70625	5.5525	4.3608
7892751	7.28739	7.67981	7.23772	7.57756	7.74931	7.6069	6.87851	7.62901	6.74665	7.6338	8.75363	7.33743	7.46284	7.65795	7.5849	7.78833
7892752	3.36112	2.75559	3.40813	3.29929	2.85484	3.10005	3.50297	2.90538	4.66769	3.41947	2.87498	3.92666	3.16436	3.15181	3.4164	3.17329
7892753	12.0193	10.6027	11.0757	11.7903	12.2622	12.1293	11.8242	11.864	11.0132	11.769	11.4387	11.7402	10.7175	11.8279	11.7846	11.4467
7892754	5.51575	4.02056	4.66747	4.55042	4.60846	4.43909	4.61737	4.36419	3.84462	5.22568	3.54515	4.75915	4.24753	4.38374	5.39145	5.01015
7892755	4.44657	4.04462	4.49129	3.91368	4.63017	4.14788	4.75364	4.66464	4.03844	3.79333	3.86483	3.91298	4.05522	3.83826	3.71886	4.22172
7892756	2.61586	2.60112	2.59351	2.58224	2.5856	2.61372	2.62351	2.64295	2.76702	2.60209	2.6142	2.59754	2.61359	2.58274	2.61006	2.63502
7892757	7.31211	7.1045	7.949	6.47249	6.8944	6.92684	7.54195	7.45629	7.42241	7.29746	7.07708	7.56762	8.25394	7.90128	7.07267	7.54437
7892758	5.48308	6.17202	5.64852	4.93364	5.76012	4.27832	5.60912	5.08669	7.51156	5.91583	5.66378	5.65045	5.85763	4.95845	5.05087	5.49895
7892759	8.09656	7.07587	7.08822	7.17378	7.68256	7.31094	7.20128	7.10909	7.70688	7.82045	6.2891	7.34072	7.3707	7.81931	7.70678	7.65334
7892760	5.08868	4.4365	4.26507	4.1669	4.02705	4.54758	4.66434	5.27181	4.11059	4.8678	6.74401	5.25752	4.49828	4.28131	4.45267	5.22285
7892761	5.75192	6.40653	6.23705	6.00687	6.40365	5.99657	6.11397	5.53426	7.95526	6.00833	6.02764	5.33602	6.20554	6.07704	4.98188	5.5303
7892762	11.2076	11.5896	11.6338	11.3904	11.2071	11.3383	11.1367	11.0675	10.4017	11.5087	11.3009	11.3659	11.5622	11.421	10.8406	11.1821
7892763	9.00451	6.75587	7.6783	8.98632	9.67887	8.86518	8.71631	8.7843	8.27101	8.87306	8.64507	8.55494	7.23894	8.69467	8.70009	8.36813
7892764	9.94857	11.0212	10.6139	10.493	10.4872	9.96896	10.5598	10.2468	10.55	10.6821	10.1526	10.6322	10.6262	10.4755	10.4051	10.1301
7892765	10.0295	8.12593	8.47023	9.60213	10.3671	9.88363	9.49846	9.81685	9.44343	9.58034	9.06396	9.57885	7.87634	9.56928	9.5668	9.18936
7892766	10.414	11.2632	11.1766	10.8404	10.5575	10.4767	10.8268	10.4415	10.003	10.6808	10.4798	10.6281	10.8856	10.5462	9.7393	10.9495
7892767	3.45706	3.6322	3.41489	3.31708	3.55916	3.33991	3.29316	3.43599	3.92403	3.65158	3.33007	3.45982	3.53447	3.65317	3.73283	3.90381
7892768	3.0748	2.88774	2.92485	3.02896	3.3806	3.07358	3.03231	3.10706	3.34987	3.0984	3.13966	3.05226	3.2098	3.40493	3.12611	2.88435
7892769	3.22156	2.81254	2.78684	2.62335	3.1247	3.02387	3.30994	3.10228	2.76113	3.05782	2.92189	2.94312	2.74935	3.08643	3.01298	2.92717
7892770	8.87002	9.46943	9.96017	9.44242	9.70939	9.86793	9.19957	9.48243	9.46063	9.41515	9.52364	9.86083	9.75135	9.59728	8.7931	9.29721
7892771	9.36957	9.77294	9.18257	9.2883	9.63402	9.36122	10.1017	10.1316	8.60078	10.0217	9.55311	9.61758	8.9867	9.66535	9.99214	9.61887
7892772	3.8656	4.94139	4.25049	4.51063	4.25494	3.8771	4.01479	4.3421	3.61833	4.97949	4.01004	4.95941	4.01802	4.15462	4.31581	4.3621
7892773	7.38163	6.89612	7.83341	7.68109	7.52287	7.07559	7.02431	6.97823	6.83138	7.58168	7.7528	7.92078	8.02809	7.32638	6.73745	7.43229
7892774	4.34764	4.49343	5.49229	5.06663	5.76821	4.74952	5.28142	3.97525	3.78581	5.51546	5.01324	5.27276	4.25615	4.66155	4.94192	4.90089
7892775	6.2718	6.61343	6.54444	5.85254	5.9087	5.94342	7.19421	6.44004	4.42856	6.14568	3.92027	6.2219	5.82741	5.16038	6.00097	6.59769
7892776	9.12957	8.95692	9.58227	9.53423	9.64328	8.73809	10.4067	10.0058	8.73069	10.5221	9.97677	9.82815	10.224	10.1303	8.74048	9.2367
7892777	4.52068	3.70102	3.53184	4.08474	4.87366	4.87525	4.02711	4.93858	4.16043	4.67543	4.98596	4.90075	3.68505	4.57811	4.67115	4.29427
7892778	5.61168	6.37287	6.52483	5.02096	5.38836	6.35579	5.83023	5.53731	5.92138	6.70813	7.54701	6.58708	6.58527	6.41289	5.98223	6.84719
7892779	7.96012	6.65857	6.8829	6.66069	6.08606	7.10885	6.72045	6.30776	7.2635	5.51083	4.79583	7.15037	6.53138	6.88719	6.79635	7.42419
7892780	4.71319	4.77835	5.01659	4.85849	5.04884	5.30827	4.34092	4.89068	7.05821	5.19703	4.61016	5.30683	4.42851	5.26228	5.17105	4.51243
7892781	4.62977	3.67875	3.37958	4.7114	5.67183	4.44177	4.6339	4.96817	3.56707	5.14576	5.15566	4.94399	3.24457	4.55856	4.44903	3.72688
7892782	11.0974	9.23473	9.88198	10.7515	11.398	11.0854	11.0727	11.0057	10.1557	10.9858	10.7307	10.8939	9.49778	11.0467	10.9175	10.234
7892783	8.73822	8.8955	9.00536	9.17012	9.50286	8.79074	8.16778	8.35021	8.07754	8.77296	9.21987	8.80166	8.53908	8.86401	8.53071	9.16594
7892784	4.02994	3.68581	4.36142	4.55941	4.4982	4.19197	3.38181	3.61768	3.56538	3.94559	3.63078	4.69721	4.40413	4.31398	4.67066	4.89147
7892785	3.80732	3.43568	3.27161	3.34991	3.06286	3.14082	4.03406	4.15798	3.35497	3.99121	3.33892	3.16121	3.89869	3.75293	3.71564	3.1724
7892786	7.7737	7.70958	8.00752	7.34318	7.70296	7.6978	8.20581	7.85883	7.12408	8.55264	8.3198	7.70481	8.77801	8.36039	7.44358	7.36335
7892787	3.45413	3.37611	3.17171	3.29239	3.05083	3.51533	4.06549	4.24536	3.05585	4.1333	3.16616	3.07235	3.42481	3.91149	3.56887	3.40667
7892788	9.97485	9.94254	9.86415	9.71013	9.7635	9.9988	10.1991	9.78603	9.27358	10.2037	9.05086	9.5787	9.84218	10.0317	9.77713	9.84123
7892789	5.25099	6.1368	5.90824	4.26496	4.9804	4.93065	6.67849	4.84837	5.22704	5.01727	4.04802	6.01356	5.49765	5.13037	6.00192	5.37496
7892790	3.14167	2.89396	2.88828	3.14319	3.02914	3.13489	3.44131	3.37613	5.29468	3.18544	3.14732	3.0972	3.05643	3.3303	3.13605	2.99794
7892791	10.9395	10.4846	11.0781	10.8204	10.9045	10.8344	11.0515	11.0344	9.79537	11.55	11.3686	11.0902	11.1666	11.0033	10.3421	11.0797
7892792	6.05253	5.66203	5.36906	5.73155	6.16	5.64596	6.1398	5.46534	4.56501	5.49007	4.90665	5.74718	5.54963	5.31226	5.63414	5.63611
7892793	3.93504	3.65476	3.7235	3.72272	3.8902	4.07331	3.6599	3.79194	4.26094	3.61522	3.50098	3.53749	3.32712	3.47683	4.28127	3.41161
7892794	5.7182	4.9327	4.93864	4.49731	5.20062	3.8763	5.08304	5.05459	6.15484	5.63465	3.69194	4.73975	5.54968	5.49243	4.89213	6.24151
7892795	5.40444	5.69061	5.28315	5.56129	5.88	5.44063	5.32939	5.74215	4.76192	5.31476	5.81883	5.39493	5.28614	5.53877	5.53248	5.4785
7892796	12.014	11.6447	11.4832	11.8203	11.737	11.7363	11.996	11.792	12.0997	11.2266	11.1374	11.3768	11.3522	11.6208	11.7502	11.7993
7892797	6.59209	6.57984	6.485	6.64369	6.30542	6.25647	6.04235	6.3366	7.12534	6.47114	6.69247	6.44073	6.25583	6.86824	6.67688	6.2992
7892798	4.38165	3.62986	4.04774	3.66253	4.18934	3.774	4.36334	3.90615	5.07235	3.79886	3.58587	3.80717	3.92825	4.13403	4.04254	3.64689
7892799	3.89479	3.54741	3.35651	3.28843	3.64969	3.53776	4.17846	3.61425	4.08264	4.46241	3.43818	3.61516	3.73139	3.87544	4.05548	3.64784
7892800	3.40957	3.13615	3.31591	3.06379	3.19267	3.1665	3.75724	3.19228	3.44116	3.14118	2.97212	3.19861	2.91871	3.28798	3.35872	3.20383
7892801	3.47995	3.02243	3.12132	3.18033	3.25542	3.09167	3.25829	3.10784	3.36135	3.18682	3.22069	3.27109	3.36391	3.40732	3.23047	3.36025
7892802	7.96234	7.59144	9.01964	8.34596	9.44864	8.54881	8.22382	8.85523	8.55776	9.14775	8.13782	9.06023	9.23378	8.63293	8.33617	8.34663
7892803	11.2723	11.7643	11.3936	11.0423	11.1581	10.8167	11.5839	11.238	10.5395	11.7422	11.3042	11.3814	11.3654	11.2645	11.4224	11.7068
7892804	4.29681	4.04165	4.06312	4.21359	4.50447	4.15249	4.20131	4.12314	4.79636	4.21263	4.17313	4.26501	4.18038	4.23132	4.42219	4.05026
7892805	3.36952	3.64471	3.12944	3.16176	3.25768	3.33955	3.39036	3.6368	3.52615	3.326	3.99934	3.2991	3.35797	3.48389	3.60762	3.60993
7892806	2.95533	2.9102	2.82665	2.85865	2.87934	3.12088	2.98901	3.18962	3.25436	2.93764	2.96128	2.94728	3.03659	3.06445	3.05659	3.06953
7892807	6.06017	5.76607	5.83929	5.74039	6.21109	5.57681	6.20687	5.55097	6.021	6.68493	6.01078	5.952	5.95319	5.90904	6.28099	5.86503
7892808	7.66628	7.8644	8.28313	8.19629	7.84253	7.95585	7.25993	7.2427	8.18231	8.31293	7.53482	8.43324	8.37631	8.12195	7.57876	7.78463
7892809	3.00628	3.19256	3.24488	3.13342	3.38491	3.13026	3.30921	3.52227	8.25612	3.35503	3.2679	3.16442	3.30859	3.46764	3.37852	2.95104
7892810	3.98636	4.47279	4.28085	4.33326	4.62694	4.09174	3.73493	3.72251	6.69752	4.21313	4.2739	4.0061	3.781	5.25158	4.00566	4.26426
7892811	2.957	2.55461	2.74017	2.74325	2.78245	2.89818	2.81043	2.56913	2.78426	2.77003	2.77356	3.5282	2.75334	2.84434	3.10572	2.81855
7892812	5.82856	4.57953	5.0037	5.50575	5.46678	5.00213	5.44994	6.24919	4.69855	5.83259	5.19852	5.09336	4.89483	5.79887	5.52444	5.08356
7892813	3.62559	2.78823	2.81356	3.03339	2.94835	2.92183	4.32858	3.37433	3.03956	3.07964	2.59278	2.76769	2.78086	2.72639	3.25377	2.75161
7892814	7.88069	7.93886	8.43847	8.37961	7.9797	8.4119	8.21395	7.66801	8.62687	7.61953	7.18045	8.96902	9.06807	7.66294	7.61317	8.48885
7892815	2.87638	2.86728	2.84622	2.8541	2.84228	2.91898	2.87433	2.89178	3.13399	2.87001	2.94122	2.8581	2.90794	2.85989	2.8827	2.90568
7892816	8.83533	6.75098	7.19362	8.49955	9.33243	8.87355	8.47735	8.94054	7.8076	8.7109	8.76079	8.53015	7.23247	8.6852	8.46998	7.62298
7892817	11.8623	12.3748	12.356	12.0734	12.2746	11.9422	12.0244	12.0967	11.4927	12.323	12.3702	11.8327	12.3553	12.3538	12.1953	11.8138
7892818	3.03674	3.13449	3.20224	3.14737	3.30492	3.31716	3.17325	3.2614	3.4194	3.32316	3.34245	3.01802	3.24847	3.28994	3.24069	3.01458
7892819	3.69879	4.27501	3.32239	3.54331	3.95878	4.59618	5.27245	5.15916	2.48684	5.36776	3.91392	4.4617	2.92531	3.73355	3.853	6.34913
7892820	10.107	10.3673	10.1312	9.49131	9.68707	9.70013	9.62669	10.1267	8.86924	10.1639	10.1484	10.4906	10.2537	9.32514	10.1052	10.0704
7892821	2.91202	2.83005	2.86935	3.08438	2.72171	2.80859	2.79593	2.78481	3.14833	2.80207	2.78924	2.84775	2.81087	2.6933	2.69182	2.99639
7892822	4.61819	3.71642	3.95655	4.16058	5.10039	4.71047	4.66595	4.79254	4.07969	4.9198	4.96639	4.57003	3.89866	4.6876	4.38299	4.21869
7892823	6.23001	5.83263	5.58525	6.26985	5.87852	5.98561	5.39561	6.00024	5.2382	5.9875	8.0402	5.93182	6.05917	5.96872	5.3569	6.3778
7892824	8.03188	8.05786	8.05621	7.9477	8.19138	8.04822	7.65832	7.50751	8.47023	7.35033	7.03986	7.55508	8.0056	7.69539	7.88416	7.9146
7892825	3.6123	3.65279	3.62746	4.19298	3.76194	3.80316	3.25745	3.49756	3.24647	3.58676	3.47369	3.20617	3.41581	3.40263	3.38548	3.34357
7892826	7.40755	5.50802	5.5811	5.98521	5.80284	6.55112	6.73156	6.74418	5.2153	5.74827	4.06151	6.17448	5.92857	6.43016	6.49663	6.7416
7892827	11.1508	9.80065	10.1886	11.068	11.4488	11.1176	11.0711	11.1332	10.4233	10.963	10.9481	10.9405	9.8498	11.0298	11.0107	10.5509
7892828	2.9188	2.77033	2.89406	2.78246	2.90516	3.38103	3.04965	3.03879	3.30721	3.01024	3.0287	2.89894	3.01389	3.25574	2.97845	2.96844
7892829	11.6124	11.2447	11.1414	11.2873	11.4023	11.3796	11.1473	11.5399	10.3444	11.4794	10.6506	10.8764	11.2913	11.3485	11.3525	11.4198
7892830	11.0081	10.2018	11.4027	11.1641	10.4081	10.9499	10.7473	10.7555	11.1786	11.0251	10.9488	11.4158	11.3403	11.2212	11.2083	10.8235
7892831	10.9441	10.5803	9.96827	10.412	10.3974	10.2693	10.2757	10.5964	9.09097	9.94297	9.79	10.0172	10.5152	10.471	10.3623	10.7368
7892832	8.53766	8.27565	8.95055	9.15511	8.53986	8.51987	8.2349	7.64263	8.25737	7.70673	7.73285	8.97927	8.6268	8.19282	8.56654	8.8394
7892833	2.96753	2.66218	2.87584	2.59359	2.72403	2.96397	2.8941	2.89488	2.65409	2.84231	2.90296	3.07702	2.90048	2.66649	2.89979	2.91011
7892834	4.02614	3.73391	4.02071	4.44395	4.36902	3.91052	4.26896	3.96901	4.05546	4.16772	3.27627	3.48184	3.82591	4.12377	4.13012	4.51174
7892835	9.70869	10.9118	10.5225	10.2011	10.3776	9.81791	10.908	10.5562	9.94027	11.3989	10.6613	10.7245	11.2508	11.0279	10.2509	10.0205
7892836	10.9426	10.9842	10.4608	10.5855	10.3492	10.6361	10.5152	10.8809	10.1603	10.3039	10.4569	10.2059	11.2574	10.5422	10.3293	10.0659
7892837	10.3022	10.5564	10.5355	10.4441	10.4606	10.5067	10.8623	10.3604	10.3109	11.0728	10.4941	10.5068	10.5467	10.5425	10.3267	10.4477
7892838	9.63579	9.38181	10.0229	10.3646	9.94461	9.53517	9.45372	9.2173	9.41884	9.14453	9.25712	9.8742	9.23812	9.19487	9.65643	9.80751
7892839	3.48825	2.93103	3.07596	2.9388	2.87016	2.8774	3.00331	3.04777	3.28646	2.87018	2.84343	3.2289	3.001	2.95375	3.15087	3.44616
7892840	6.86446	4.83546	5.08828	5.64314	5.67611	6.68847	6.84076	5.8183	5.44136	6.24166	4.82437	6.95181	4.55861	6.31124	5.96437	5.65684
7892841	8.35399	8.29141	8.83114	8.6653	8.08592	8.59836	8.3016	8.88731	8.50359	8.54884	7.88232	8.92944	8.43523	8.45246	8.49546	8.82622
7892842	3.6725	3.21218	3.65719	3.63839	3.18104	3.40546	3.85822	4.02678	3.66071	3.77006	3.5788	3.88284	3.6831	3.71572	3.75292	3.54367
7892843	5.94835	4.85954	5.23228	4.70826	5.27058	5.44971	5.73137	5.50794	5.54749	5.43132	5.39038	5.92305	5.80295	5.53997	5.54105	6.55708
7892844	3.37087	3.21401	3.24658	3.32709	3.56544	3.03361	3.30801	3.15182	3.06603	3.10887	3.35737	3.35427	2.96954	3.22849	3.37487	3.23585
7892845	7.50984	6.30868	6.52738	7.66506	7.71467	7.43074	7.0167	7.26818	7.35319	7.17485	7.44031	7.20131	6.54617	7.49366	7.08074	6.94116
7892846	11.4515	11.4313	11.9231	11.6676	11.4704	11.6737	11.6737	11.7473	11.6211	11.6138	11.7623	11.8324	11.8561	11.8971	11.4771	11.3704
7892847	9.56247	9.52477	9.47829	9.56182	9.43907	9.62653	9.12599	9.1905	9.22803	9.28001	9.23825	9.80231	9.39483	9.43046	10.0824	9.81382
7892848	9.41589	9.27322	9.11547	9.08889	9.11827	9.25394	8.48265	8.97956	7.66584	8.99063	7.89717	9.31099	9.03547	8.49241	8.9479	9.83308
7892849	3.87378	3.27801	3.07964	3.62015	3.50372	3.30707	3.84801	4.10311	4.61387	3.76338	3.75319	3.7224	3.19802	3.62568	4.08143	3.67304
7892850	7.64461	7.89847	7.85307	7.66659	8.09396	8.04414	7.20451	6.9554	7.10701	8.5046	6.38889	7.93455	8.02743	8.13311	7.88085	8.30454
7892851	5.51304	5.87495	5.6856	5.72515	5.2606	5.64449	4.92354	5.59337	4.90782	5.2855	4.44416	5.8983	5.44674	5.36972	5.31586	5.35471
7892852	5.33746	5.48418	5.46487	5.49622	5.78535	4.75762	5.17252	5.65144	6.38468	5.69649	5.35755	5.52887	5.28254	5.61618	5.67251	5.99551
7892853	10.9668	10.9804	10.9131	10.5165	11.0212	10.8002	11.0004	11.0307	9.99474	11.3486	11.3379	11.0765	11.1497	10.9906	10.957	10.9887
7892854	3.27169	3.94508	3.36678	3.86043	3.69675	3.21937	4.77163	5.35569	6.38969	3.46623	2.90296	3.9557	3.20107	3.42345	4.82097	3.56922
7892855	4.90949	4.64443	4.24963	4.22092	4.62659	5.47673	5.69544	5.81521	4.03471	4.17443	4.23659	4.70988	4.61283	3.88142	4.65386	5.08102
7892856	5.18031	4.20697	4.20396	3.96663	4.6773	3.99625	5.3326	4.38928	4.97384	5.19553	4.48134	4.84558	5.0371	4.31415	4.04863	4.20922
7892857	10.9022	10.6543	10.7745	10.8139	10.8245	10.7512	10.6858	10.9909	10.0861	11.1243	10.8387	10.7994	10.6926	10.8783	10.8894	10.8221
7892858	2.773	2.78231	3.02302	3.00618	2.91998	2.71597	2.83437	2.75519	3.13386	2.83332	2.65016	2.87412	2.80034	2.95475	3.47306	2.89612
7892859	6.38402	6.15348	5.65247	6.34945	6.09483	5.42616	5.40254	6.19547	4.76704	5.84699	6.53317	6.43622	5.58674	6.14922	6.22006	5.89507
7892860	5.02194	5.25371	5.28042	5.24711	5.43134	4.564	4.2897	4.98776	6.62243	5.21933	5.36055	4.75587	4.98884	5.51883	5.02798	4.85074
7892861	8.44966	8.94892	9.22181	8.88678	8.46727	8.78697	8.74562	8.07776	8.96412	8.1496	9.27865	9.13404	9.41278	9.02992	8.02063	8.96791
7892862	10.6393	9.56994	11.1296	11.088	11.0429	10.9221	10.6932	10.9257	9.04336	9.78741	10.9366	10.5291	10.2961	10.3759	11.0095	10.5655
7892863	6.93166	5.51826	6.23729	6.4475	7.69203	7.19134	7.42048	7.55572	9.72575	7.61468	6.85526	6.55016	7.72529	7.43706	6.93961	6.54689
7892864	4.14324	2.9644	3.79149	4.09533	4.26414	3.85559	5.19092	3.40921	4.54692	4.50319	3.19715	5.52003	4.48585	4.00748	3.08377	3.71223
7892865	9.36613	7.61597	7.97987	9.12716	9.98351	9.06222	9.04151	9.45612	8.04052	9.42676	8.66854	9.18728	7.35772	9.36229	9.20801	8.54137
7892866	4.79629	4.28715	3.97978	3.41766	4.36856	3.91153	4.56096	3.62832	3.4008	3.97545	2.88513	3.85424	4.69431	3.59645	4.25168	5.69992
7892867	3.25392	3.60721	3.64682	3.206	3.56861	3.56737	3.41762	3.51834	3.22879	3.79036	3.944	3.14932	3.40232	3.47743	3.71085	3.27368
7892868	11.7797	12.0379	11.7258	11.335	11.6174	11.2978	11.9523	11.8505	11.0185	11.8501	11.2677	11.8526	11.6707	11.7248	11.7063	11.7744
7892869	8.78212	6.39256	8.0074	8.69904	9.68929	8.84917	8.78818	8.4809	8.01323	9.2514	8.32022	9.36296	7.94786	8.62493	8.73418	8.12585
7892870	7.93573	8.56504	8.23862	7.94567	8.2163	7.82362	7.83045	7.61431	8.18606	8.58952	7.37032	7.72853	8.74385	8.38196	7.69807	8.00392
7892871	8.13504	6.40098	7.09116	7.59015	8.30606	7.67298	7.59723	7.64451	6.77089	8.50578	6.62946	7.96916	7.58669	7.72235	7.92783	7.63323
7892872	7.34569	6.74554	6.2608	6.47655	6.92782	6.28376	7.07411	6.63885	5.88939	6.47188	5.75858	5.99021	6.48805	7.15758	6.486	6.19612
7892873	5.2934	2.79001	3.66898	3.2582	4.43403	3.11482	4.87472	5.01444	3.8564	4.25824	2.96788	4.75592	2.86032	3.59231	3.70113	3.47596
7892874	4.76046	4.35668	4.24486	4.31204	4.18912	4.55468	3.99777	4.59975	4.05414	4.18577	3.63939	4.2831	3.95112	3.8179	4.07332	4.98842
7892875	5.64515	5.35469	5.55265	5.64579	5.32847	6.02662	5.44034	5.00931	6.27703	5.53205	4.83342	5.59168	4.62305	5.47953	5.70078	5.38504
7892876	5.44052	5.82024	6.06187	5.03622	5.14674	4.58309	5.30423	3.82392	3.70331	5.85615	4.39134	5.49727	5.7882	5.63527	6.23712	5.64056
7892877	5.34083	3.33837	4.01564	3.43888	3.83096	4.29265	4.15333	3.73306	3.77847	4.04791	3.3836	4.0622	3.51774	3.58013	3.83099	4.04765
7892878	4.90255	4.7738	4.19114	4.69619	4.70874	5.06805	4.08493	4.66126	4.65545	5.08269	5.02362	5.13556	4.20163	4.72316	4.40584	4.70733
7892879	3.65337	2.85431	2.98353	3.29896	3.67009	2.90549	3.95661	3.91565	3.85649	3.66669	2.94975	3.2941	3.28792	3.41023	3.81283	3.72638
7892880	10.2083	10.5041	10.3766	10.0665	10.1715	10.2725	10.3096	10.3756	10.3031	10.843	9.83142	10.5332	10.169	10.3615	10.5155	10.5983
7892881	5.32528	4.52608	3.98825	3.91339	4.16734	4.17327	4.6931	4.26507	3.58258	4.41352	4.45976	3.87916	3.98695	3.60354	4.08441	4.02006
7892882	9.66156	9.50487	9.48475	9.68732	10.1767	9.50619	10.1108	9.64573	8.74588	9.55383	9.42976	9.8371	9.73199	9.74909	9.52929	9.20523
7892883	3.7946	3.50469	3.60469	3.81846	3.58631	2.95336	3.94779	3.76096	3.81642	4.22549	3.3517	3.65734	4.71235	3.86727	3.69517	3.39403
7892884	10.5054	11.1972	10.7686	10.8302	10.7448	10.7174	10.8217	10.7515	10.7854	10.9692	10.9095	10.6943	10.7406	10.8397	10.8689	10.5584
7892885	4.06939	4.41472	3.91932	4.08653	3.59981	4.18243	4.04223	4.02414	3.26309	4.63987	6.10375	4.18673	4.44303	4.15601	4.16547	4.19106
7892886	5.16941	4.32612	4.45816	4.26687	4.41052	4.8457	4.44545	4.57806	7.24712	4.44408	4.25006	4.47347	4.33556	4.70308	4.74345	4.73174
7892887	3.25123	3.20154	3.09938	3.02203	3.31462	3.04555	3.26714	3.10139	3.07263	3.20858	3.02242	2.9244	3.01279	3.17513	3.09408	3.51109
7892888	4.76698	6.07083	5.09852	4.27807	5.10263	4.72595	5.17413	4.04937	4.01262	5.14399	4.1031	4.73824	4.54924	4.51321	5.20993	5.29136
7892889	11.2841	9.11255	9.8281	10.9884	11.5475	11.2126	11.1328	11.2401	10.2084	11.2591	10.7351	10.8474	9.60656	11.1506	11.1079	10.2393
7892890	10.2859	11.3886	10.8911	10.8992	10.8876	10.6197	10.7858	10.7413	10.7718	10.907	10.6497	10.7363	10.7863	10.744	10.7982	10.2695
7892891	11.3608	9.8628	10.4731	11.4309	11.78	11.4489	11.4111	11.4322	10.6252	11.234	10.8915	11.3413	9.78641	11.2678	11.3956	10.955
7892892	5.43185	6.67328	4.8237	4.84038	5.35501	4.73663	6.57889	6.74585	5.28361	6.71446	5.03641	4.395	5.45683	5.12361	6.02506	5.52501
7892893	8.31799	8.07836	8.16639	8.11244	8.00611	7.83544	8.17939	8.03494	7.29599	8.5629	8.81658	7.80089	8.15007	8.41816	8.50728	8.14976
7892894	9.19433	9.44092	9.05585	9.99897	9.08545	9.79772	8.58274	9.21249	8.46101	8.45862	7.85725	9.34977	9.22854	9.16701	9.23651	9.10717
7892895	5.2142	5.67895	5.19266	5.28587	5.97258	5.58964	5.02129	5.64868	5.1111	5.80823	5.61146	5.06784	4.93523	5.68581	5.95649	5.5018
7892896	10.0349	10.0689	10.4863	10.5768	10.4146	10.5477	10.436	9.80436	10.9968	10.3337	10.4569	10.3361	10.7381	10.3966	10.2987	9.95636
7892897	6.65216	5.51512	6.44682	5.99467	6.83726	5.37523	6.20717	6.4379	5.54849	6.29505	4.58115	5.67787	5.59668	6.52272	6.96024	5.72267
7892898	7.85114	7.26222	7.79722	7.74072	8.18079	8.14799	7.36819	7.21178	6.86806	7.73578	8.26405	7.80511	7.46998	7.77098	7.89235	7.82331
7892899	10.7674	8.92839	9.45189	10.4591	11.2043	10.7656	10.5729	10.7586	10.0176	10.7178	10.5155	10.5683	8.65463	10.5563	10.4207	9.99872
7892900	11.0494	11.6119	11.3817	10.8891	11.5501	11.1981	11.2918	11.3708	10.7813	11.4808	11.2664	11.3836	11.5236	11.5257	11.4713	11.4376
7892901	10.8837	11.1674	10.9717	10.986	10.7374	10.8293	10.5464	10.686	10.1316	10.2871	9.87852	10.838	10.2486	10.3541	10.6987	11.0157
7892902	11.8254	11.6105	11.9526	11.8985	11.8709	11.9351	11.9163	12.1866	11.3945	12.2168	12.0783	11.9743	12.0786	11.9303	12.0822	11.8883
7892903	7.62612	5.56496	6.08281	7.1381	8.00669	7.33985	7.03332	7.62999	6.98023	7.42965	5.80031	7.27657	5.30693	7.08897	7.28987	6.90573
7892904	6.65497	5.42916	5.95983	4.49855	5.15329	5.99603	6.78993	6.16348	5.49559	6.80961	4.04893	6.4547	6.37785	5.8399	6.15699	6.60469
7892905	3.42218	4.10655	3.62887	3.58584	3.45129	3.05983	3.48232	3.6007	2.68994	3.80328	3.16336	3.22654	3.04442	3.44283	4.18878	3.49776
7892906	10.8926	11.499	10.8244	10.8529	11.1835	10.8837	11.2639	11.0448	10.6311	11.3081	11.118	11.2394	10.7954	11.4395	11.1291	10.9057
7892907	10.6921	10.8946	10.8304	10.3014	10.2413	10.0972	10.7434	10.7005	9.62242	10.8268	10.5596	11.0035	11.2512	11.0894	10.6201	10.8244
7892908	5.64855	6.03105	5.57149	5.75646	5.49338	4.69436	5.51951	5.47974	4.90214	5.20743	5.54989	5.51585	5.17472	5.15305	4.54246	5.43595
7892909	6.51057	5.21417	6.53507	5.96272	6.36279	6.09859	6.48257	6.47464	4.9838	6.94064	3.89699	6.30529	6.84326	7.05436	6.63611	6.96746
7892910	6.45486	5.45051	5.45903	4.2814	5.7909	5.51512	5.60251	4.88752	4.86202	5.36776	3.86514	5.59613	4.4617	5.62002	6.16234	6.34913
7892911	5.18124	5.74814	5.68419	5.47864	5.7675	5.30038	4.93008	5.42354	5.84551	5.17433	5.95357	5.37517	5.31141	5.08411	4.98305	5.30552
7892912	3.86352	4.12727	4.181	4.62142	4.49699	4.37073	3.62324	3.77112	5.21364	3.94551	4.20351	4.61971	3.94426	4.2951	3.76234	5.27113
7892913	7.38342	6.94526	6.49643	6.22137	8.17389	6.6995	6.88643	7.4799	6.23534	7.66157	6.01543	6.75236	7.36334	7.16232	6.20821	6.80791
7892914	7.17677	3.63114	4.19768	3.92163	5.40657	5.02953	5.7726	6.28523	5.06445	5.76152	4.06485	5.53292	4.41819	6.3066	5.71824	4.05326
7892915	7.11264	6.74557	7.1802	7.60142	7.94519	7.55947	8.22747	8.19717	6.82951	8.29109	7.7468	7.89507	7.3038	7.69891	7.7893	7.78045
7892916	5.21394	5.24226	5.39228	5.55913	5.24188	5.50265	5.05275	5.36423	5.52954	5.31223	6.11442	5.50147	5.45656	5.45849	5.06578	5.53285
7892917	6.01269	5.10126	5.18573	4.86543	6.28057	5.21328	5.362	5.77015	4.93952	5.90929	4.6216	5.34223	6.32855	5.4812	5.41578	5.58415
7892918	5.89287	5.07797	5.44402	5.21652	5.5999	5.66809	5.55205	5.80561	5.22583	6.06867	5.5866	6.14047	5.48466	5.8342	5.06097	5.1658
7892919	6.25656	7.30037	7.00333	7.00852	7.36852	6.36365	6.58968	6.54413	5.84525	7.16951	8.32593	7.01153	6.98814	7.26405	5.36776	6.93231
7892920	9.52728	9.5105	9.06494	9.12294	9.09189	9.10844	8.76055	9.27827	7.57201	8.92189	9.3699	9.24419	8.49287	9.25189	9.76805	9.77986
7892921	3.85433	3.53504	3.44463	3.63098	3.34494	3.45856	3.28523	3.48347	4.31833	3.63962	3.51092	3.54015	3.04754	3.51906	3.37359	3.75346
7892922	3.73333	4.18239	4.20044	3.80774	4.14274	3.73253	4.57118	3.39643	3.33603	3.93171	2.97726	3.65613	4.17411	3.83854	3.85689	3.95857
7892923	3.01698	2.73509	2.81916	2.90977	2.99063	2.95334	2.83765	2.86447	3.48614	2.94453	2.77317	2.86115	3.12655	2.77038	3.04074	2.85304
7892924	9.94776	9.3313	9.61701	10.3046	10.2093	10.054	10.0341	10.2395	9.97588	10.2603	10.3455	10.1393	9.79956	10.3013	10.0481	10.2957
7892925	8.43573	7.93005	7.4897	8.18596	7.84249	8.09938	8.32467	8.43296	8.68876	7.74218	7.35294	7.72097	7.60725	7.9507	8.06145	8.34519
7892926	8.14105	5.43527	6.16623	7.63853	8.57616	7.8185	7.78444	7.82819	6.68884	7.67092	6.50138	7.99637	5.70333	7.86838	7.56867	6.75139
7892927	3.52313	3.30428	3.44458	3.20253	3.54808	3.21486	4.02853	4.37664	4.27216	4.39364	4.842	3.64569	4.04227	4.41643	4.96289	4.10478
7892928	10.136	8.57429	9.0781	9.99989	10.5261	10.1376	10.0398	10.1473	9.58486	10.0879	9.85359	9.98998	8.76738	9.99979	10.0088	9.5895
7892929	3.5273	3.53628	3.29833	3.15406	2.96239	3.19766	3.73979	3.39938	3.03789	3.34938	3.02233	3.15546	2.78722	3.39366	3.39871	3.28599
7892930	10.3229	9.95171	10.175	10.5935	11.0434	10.4882	10.1233	10.3046	9.50052	10.3917	10.4927	10.2938	9.79415	10.3159	10.4339	10.089
7892931	5.56332	6.00524	6.15065	5.64108	6.20458	5.37131	6.07466	5.4991	4.80215	6.36303	6.28977	5.88295	6.3098	5.97997	5.87363	6.33198
7892932	7.45302	7.01177	6.78176	6.72212	7.23313	7.63672	6.78497	7.50375	6.29632	6.59775	4.91777	7.69549	6.37536	6.66714	7.13282	8.16108
7892933	7.76765	6.88135	6.93342	6.88577	5.57715	6.24943	7.05379	6.8456	6.02022	5.95853	5.94234	6.79427	6.85986	6.97457	6.73816	7.44097
7892934	6.37724	5.17492	4.84347	5.20043	5.82865	5.47196	5.86198	6.54722	5.77211	5.28627	4.78125	5.31913	4.92461	5.79081	6.28259	5.88394
7892935	8.45758	8.6947	9.30506	9.01698	8.97951	9.12355	9.38893	8.26832	8.55353	9.56573	9.74595	9.19078	9.45772	9.25799	8.77209	8.69761
7892936	4.12521	3.83754	4.17019	4.28414	4.34184	3.75801	4.51284	4.83864	3.5343	4.13025	4.23389	4.82967	4.16546	4.39787	4.10529	4.38758
7892937	8.03574	6.22701	6.43057	7.64435	8.60476	7.75817	7.43163	7.73119	6.88796	7.7647	6.94382	7.5214	5.77469	7.47852	7.51127	7.17274
7892938	7.91204	7.08644	7.44823	7.61347	8.32006	8.21399	7.47446	7.40174	6.67567	8.193	6.7968	8.08879	7.83661	8.02353	7.87741	8.28834
7892939	9.82991	9.61524	10.1282	9.92853	9.64732	9.84672	9.69211	9.70109	9.74817	10.0846	10.1258	10.1967	10.1492	10.0714	10.3724	9.92515
7892940	10.5368	8.46465	9.08877	10.1628	10.8496	10.4249	10.3337	10.3057	9.2802	10.2782	10.3951	10.0347	8.63874	10.0789	10.0365	9.57578
7892941	10.2777	10.5635	10.3792	9.87496	10.2511	10.0086	10.6354	10.6623	9.36986	10.6493	10.2202	10.4041	10.4903	10.6568	10.3429	10.3227
7892942	4.54949	4.03537	4.61277	4.939	4.33012	4.68111	5.02647	4.42908	3.94145	4.4542	4.91678	4.6691	4.0926	4.78794	4.27909	4.67008
7892943	2.67794	2.65877	2.64815	2.61925	2.64795	2.68217	2.69498	2.69297	2.8739	2.6679	2.67635	2.66463	2.68764	2.6545	2.69188	2.67511
7892944	8.04277	8.16582	8.58098	8.32042	7.76457	8.43267	7.91722	7.83088	7.89671	8.04472	8.46179	8.04429	7.89228	7.72308	8.29047	8.3285
7892945	3.93082	3.3781	3.48511	3.56879	4.45548	3.63885	4.02777	2.98735	3.19887	4.02525	3.59353	3.89465	3.63391	3.73828	3.82835	3.54231
7892946	4.55849	3.69607	4.01866	4.26145	4.30194	4.11256	3.93569	4.37537	4.23003	4.96453	4.04859	3.74243	4.04937	4.15857	4.52957	4.02885
7892947	10.8936	11.3531	11.2655	11.3601	11.1496	11.1597	11.13	10.5164	11.1997	10.793	11.1451	11.0394	11.1111	10.9261	10.887	10.8559
7892948	10.8111	8.68865	9.41972	10.2806	11.1214	10.5784	10.2312	10.336	9.66854	10.2936	9.98745	10.1151	8.90369	10.5092	10.4148	9.86078
7892949	6.31392	6.08572	5.49761	5.84541	5.70555	5.96491	5.96287	6.20069	4.75436	5.59109	4.36101	5.97667	5.51337	5.56516	6.67629	6.72714
7892950	3.38264	3.70081	3.27651	3.8849	3.53592	3.47345	3.55732	3.96528	3.94335	3.49732	4.04973	3.82084	3.33697	3.26663	3.31299	3.60026
7892951	7.16176	6.40875	6.97838	6.50486	6.32946	6.36124	6.47158	6.8498	9.57838	6.65366	4.88567	6.81109	7.24616	6.88757	6.8706	6.39996
7892952	6.36092	5.23644	6.15631	5.79773	5.66061	5.87738	5.92651	6.26568	5.71526	6.02764	4.84787	6.06972	5.90284	6.36597	6.6853	6.78501
7892953	6.2452	5.18226	5.99269	5.60727	5.13805	5.19052	6.08621	6.02406	4.69006	6.0445	5.58644	5.26067	6.40958	5.90845	6.47758	5.45752
7892954	7.63373	8.53547	9.2626	8.68257	8.21004	8.51215	8.45514	7.66867	8.54551	8.12447	9.27888	9.02125	9.4732	8.85857	7.48303	8.61805
7892955	9.8075	8.45412	8.8371	9.93667	10.6028	9.95809	9.43505	9.58534	8.85838	9.68818	9.74682	9.82255	8.69864	9.9615	9.71054	9.17422
7892956	10.4172	9.2548	9.56513	10.1339	10.4859	10.3019	10.142	10.3042	9.55908	10.3093	10.4402	9.95398	9.39611	10.1643	10.2948	9.88965
7892957	4.67686	4.78864	4.56049	4.83296	4.89978	4.72954	4.82589	4.43466	4.09734	4.92155	4.75361	4.84617	4.56873	4.67883	4.5329	5.03285
7892958	5.85394	4.21412	6.41891	5.71884	5.3637	5.26294	4.83947	5.46942	5.64551	5.20128	4.71316	5.78483	4.99154	5.74477	6.03092	5.22773
7892959	5.5601	4.94446	5.71318	5.77859	4.48388	5.26433	5.35403	5.74812	5.90847	5.27806	5.63409	5.74353	5.48427	5.65112	5.1836	5.46136
7892960	9.75579	9.08665	9.1881	9.49949	10.0738	9.32095	9.28303	9.45436	9.01573	9.20446	9.46885	9.28231	9.22268	9.61254	9.55879	9.41817
7892961	5.45094	4.48771	4.52624	4.4616	4.77173	4.49108	5.78596	4.82991	4.31625	5.19945	3.58724	4.43828	4.62808	4.75779	4.96141	4.80879
7892962	5.94437	4.68379	4.25626	4.44653	5.22505	4.89322	5.59051	5.382	5.59876	5.592	4.62329	5.97255	5.42264	5.18184	5.58039	6.87064
7892963	4.4786	4.47705	4.31617	4.27517	4.23031	4.28697	5.25744	5.31675	4.08405	4.73045	4.41685	4.37113	4.37266	4.83555	5.29436	4.98514
7892964	5.31547	3.95556	3.84559	4.70292	4.82973	4.46873	5.3569	4.86826	3.62982	4.5448	3.97346	4.01305	5.03502	4.63039	5.25499	3.79523
7892965	2.97038	2.62084	2.81445	2.78341	2.95145	2.85386	2.91548	2.86911	6.26416	3.0505	2.80649	2.80558	2.83982	2.84035	2.81379	2.90638
7892966	8.89754	8.76379	9.53813	9.0911	9.16155	9.16162	8.82734	9.15627	10.0639	9.58006	9.53055	10.0339	9.27332	9.01049	9.32896	9.12357
7892967	9.32973	9.94205	9.26353	9.44472	9.65902	8.93735	9.70924	9.85777	8.38376	9.80774	9.30906	9.27383	9.27495	9.64697	9.81238	9.6184
7892968	7.04641	6.72551	7.80811	7.83904	6.19341	7.33028	6.66193	7.03376	7.55276	6.70374	6.74966	7.80247	8.12078	8.06672	7.03501	6.8765
7892969	10.7397	8.93363	9.44142	10.3625	11.0173	10.6368	10.6391	10.6722	9.44338	10.4431	10.3441	10.3781	9.15377	10.4699	10.5029	9.7577
7892970	3.11075	2.77276	3.0614	3.03874	2.82442	3.11047	3.23316	3.15328	6.36747	3.12373	3.06613	2.73967	3.09263	2.95374	3.65498	3.44526
7892971	2.66552	2.64314	2.63487	2.6104	2.63463	2.66675	2.67642	2.68666	2.81614	2.67075	2.65559	2.63641	2.68822	2.64152	2.66755	2.68035
7892972	11.2944	11.5706	11.4708	11.6442	11.4106	11.3979	11.1112	11.0358	11.1049	11.2256	10.6669	11.4114	11.1944	10.9151	11.3848	11.5195
7892973	4.04491	3.53244	3.62083	4.15049	4.12407	3.89026	3.72595	3.51914	5.07376	3.79772	3.04921	3.45016	3.59345	3.71628	3.63991	3.67757
7892974	5.95443	5.39235	4.60637	4.95505	5.47876	5.58495	5.40867	6.66382	5.05429	5.82202	4.3689	5.05378	5.75664	5.62306	4.91007	5.53162
7892975	3.58132	2.957	3.37829	3.01603	3.38355	3.72655	3.98432	3.30412	3.86984	3.66781	3.00978	4.34713	3.37403	4.25989	3.42831	3.47952
7892976	4.52589	4.27339	4.84414	4.88034	5.36078	4.13117	5.55231	4.17016	3.41769	5.35579	3.75588	4.93758	4.61653	5.81755	5.46519	5.37106
7892977	9.44865	9.90122	10.4218	9.57488	10.2884	9.93319	10.1555	9.83426	9.57905	10.6617	10.3329	10.3785	10.98	10.4284	9.9205	10.1031
7892978	7.24119	4.24952	5.26831	6.36286	6.48226	6.58284	6.66057	6.64821	5.08625	6.0532	5.34448	7.32019	4.88726	6.0768	6.88992	6.21857
7892979	9.83252	9.60761	9.71296	9.98252	9.70388	9.59203	9.69689	9.83704	8.59006	9.33521	8.43319	9.55604	9.59958	9.32797	9.7714	9.4704
7892980	6.30253	4.14818	4.3453	5.05201	6.39212	6.01919	6.62566	6.07223	5.60391	6.77886	4.40038	6.01208	4.63672	6.22667	5.69644	4.52931
7892981	7.3792	9.07261	9.26896	8.77614	8.40447	8.48062	8.6656	7.72137	8.85408	8.14398	8.47127	9.23425	9.44178	8.78202	7.68983	8.53817
7892982	7.11643	6.6492	6.35288	5.77535	5.76505	5.49628	6.54055	5.40231	6.29929	5.21221	3.99847	6.95255	5.95887	6.62199	6.9298	6.86993
7892983	10.5564	10.6547	10.6591	10.8159	10.4489	10.3743	10.3557	10.9865	9.21702	10.5517	10.1585	10.4357	10.5744	10.753	10.7113	10.6269
7892984	5.76001	4.93723	5.86313	5.50006	5.34729	6.10239	6.08424	5.84505	5.01516	5.5929	4.95126	5.72529	5.54177	5.98736	6.0908	6.20571
7892985	6.18575	6.17224	6.40668	6.65414	6.78939	5.75037	5.40248	6.17611	5.61023	6.20378	5.6953	5.55067	5.65373	5.50109	6.04954	5.95589
7892986	10.8561	11.5785	11.2299	10.8549	10.9532	11.0645	11.1124	10.9486	10.7473	11.1748	11.2484	11.35	11.2339	11.0687	10.9143	11.2072
7892987	11.4916	10.3229	10.4875	11.342	11.9201	11.5966	11.5816	11.5208	10.8079	11.5028	11.2436	11.5307	10.3886	11.5375	11.4557	11.0816
7892988	3.00156	3.21143	2.94861	3.03126	2.91631	3.25306	3.00486	3.19869	3.06693	3.08576	2.77798	2.90367	2.91646	2.92448	2.94138	3.00692
7892989	6.91643	6.50527	5.5883	6.10403	6.01157	6.19547	6.42968	6.88221	4.84112	6.26407	6.96933	5.8004	6.39821	5.88459	6.36347	6.90443
7892990	5.95968	4.84166	6.93299	5.67408	7.27596	6.82331	5.88202	5.6182	5.96763	6.69386	5.82483	6.65731	5.94731	6.20663	6.53412	6.92773
7892991	8.44249	7.42602	7.46387	7.98529	8.90616	8.50798	8.36463	8.28946	7.36051	8.32906	8.09063	8.01763	7.24476	8.32063	8.25158	7.52595
7892992	10.9932	9.23075	9.73565	10.7208	11.3047	10.8872	10.8206	11.0775	10.0337	11.0799	10.9883	10.723	9.733	11.0319	10.6336	10.123
7892993	9.43046	8.44171	8.47076	9.67626	10.3042	9.65028	9.39006	9.45775	8.87371	9.51157	8.82842	9.57355	7.93802	9.31678	9.33594	8.79915
7892994	3.25603	3.08248	2.95923	3.15884	3.09433	3.08372	3.7858	3.41104	3.07836	3.11735	2.99003	3.15682	3.20468	3.05879	3.37839	2.98688
7892995	3.11987	3.45339	3.36484	2.79675	2.87784	2.95652	3.44706	3.07169	3.37664	3.24466	3.25406	2.87584	3.11241	2.96431	3.75309	3.35053
7892996	7.1196	6.1761	6.2876	6.6459	7.26046	6.84257	7.23271	7.58278	6.61309	7.21944	6.46827	6.98749	6.00715	6.92077	6.9101	6.69595
7892997	3.27876	3.01446	3.30026	3.09877	3.30107	3.41232	3.27026	3.84028	5.28441	3.59338	3.92971	3.54712	3.48131	3.50474	3.94215	3.34524
7892998	7.37018	7.24978	7.11624	7.43225	7.07142	7.13244	8.02673	8.94798	4.8987	7.50414	5.67564	7.38784	6.83849	7.7234	7.37759	7.51051
7892999	4.61748	3.82973	3.75825	4.06764	4.57343	4.03581	3.96892	3.35252	3.44963	5.19761	3.8217	4.74815	3.32168	4.80188	3.62349	3.50349
7893000	3.96868	4.47523	4.89522	4.56367	4.98598	4.72546	4.59728	5.25718	5.57497	4.86838	4.69043	4.45044	4.27532	4.57707	4.73586	4.40689
7893001	8.64301	7.90617	8.22585	8.09651	8.03812	7.99323	7.7878	8.12259	6.4733	8.20932	8.2103	7.87577	8.84027	8.83919	8.40185	7.42475
7893002	10.6274	10.5791	10.8898	10.4838	10.592	10.2518	10.6748	10.5808	9.88177	10.5896	10.2006	10.6001	10.5964	10.3564	10.9907	10.3831
7893003	6.13812	6.26858	6.04197	6.23796	5.9916	5.69703	6.08162	6.44087	5.45723	6.44457	6.69758	6.10766	5.93701	6.07047	6.2278	6.46067
7893004	7.03569	5.05491	5.40317	5.85167	6.33399	5.70028	7.66088	8.06811	5.79686	8.03809	6.21481	6.58722	7.37895	7.30815	6.99885	5.80009
7893005	3.29386	3.69879	3.59351	3.28384	3.15831	3.31802	3.34137	2.89862	4.85253	3.84541	2.99394	3.92661	3.33333	3.35795	3.36148	3.28903
7893006	5.45573	5.13279	5.45194	4.44294	5.30712	4.95713	5.03168	5.18774	5.1808	6.47126	4.79797	5.23886	5.32538	5.07801	5.01933	5.24309
7893007	7.93619	6.92062	7.52537	7.55794	8.16923	8.06459	7.48305	7.7077	6.97944	8.41074	6.32302	8.53709	7.33606	7.60328	7.79932	8.55023
7893008	4.42403	4.5331	4.50769	4.7899	4.59885	4.2077	4.12216	3.88138	7.29642	4.31826	4.08122	4.60499	4.50141	4.84171	4.26879	4.57892
7893009	3.65541	3.2274	3.47579	3.337	3.03217	3.25678	3.04831	3.62304	2.78898	3.31807	3.12629	2.92965	3.08945	3.20489	3.96569	3.57898
7893010	6.8574	5.75987	5.76828	5.95777	6.5834	6.01598	5.85638	6.60724	5.64	6.23026	6.47907	6.08657	5.77053	6.31997	6.61476	6.29834
7893011	4.66685	4.70685	4.62971	5.09159	5.64883	4.79892	4.77269	4.46908	4.43408	4.93319	4.95134	4.73449	4.54423	4.79572	4.95288	4.75622
7893012	9.4434	9.04376	8.84725	9.15874	8.76545	9.05724	8.81166	9.5578	7.33423	8.38822	7.41479	8.64005	8.65789	8.86607	9.33869	9.08632
7893013	6.30542	5.80226	5.73157	6.04782	6.18945	5.64669	5.946	5.93182	7.23783	5.8434	5.36571	6.27912	5.96903	6.65105	5.91334	5.62062
7893014	6.57046	4.4077	6.54759	6.95718	6.93326	5.75602	7.28994	5.38371	5.5541	5.45339	3.60644	7.31455	6.4358	5.82372	5.05325	6.53854
7893015	10.3987	9.29117	11.0955	11.1432	10.6278	10.5323	10.6514	10.4988	10.9622	10.8604	11.5955	11.3222	11.1813	11.0845	11.0458	10.9266
7893016	3.92884	4.38775	4.19098	3.85908	3.94094	4.16653	3.71581	4.26	4.18101	4.21485	4.27562	4.19056	4.12253	3.58923	3.9309	4.55167
7893017	5.31044	5.13312	5.54808	5.68246	5.74017	5.28002	5.24961	5.24445	5.14917	5.35668	5.32075	5.10261	5.27839	5.66936	5.50946	5.62414
7893018	4.98771	4.65921	4.47426	4.74162	5.11448	4.59665	4.69943	4.80242	4.77067	4.684	4.55946	4.76757	4.64265	4.80906	5.0551	5.14322
7893019	8.92084	7.17717	7.12239	7.37639	6.71508	7.04463	7.65364	8.2494	5.22933	7.0677	5.54472	6.6102	7.58764	7.76486	6.91109	7.71604
7893021	3.5584	3.60982	3.8304	3.60798	3.73081	3.75334	3.16331	3.33937	3.82441	3.70465	4.29281	3.39732	3.80056	3.78535	3.08298	3.83352
7893022	3.72438	3.46897	3.56937	3.35082	3.54425	3.20313	2.9808	3.5048	4.33803	3.94817	4.24347	3.9144	4.10661	3.88121	3.78087	4.20594
7893023	8.79565	9.32407	9.31051	7.63044	8.78434	9.24566	9.66838	8.5675	9.42464	9.75863	9.15303	9.5229	9.847	9.35562	9.58891	9.37053
7893024	4.037	3.46498	3.72334	3.59911	3.80086	3.46794	3.60265	3.33663	4.10429	3.83213	4.07195	3.66368	4.08207	3.63842	3.28651	3.59638
7893025	8.21903	7.66717	7.88182	7.71689	7.46114	6.98881	8.139	7.88024	6.84641	8.31389	7.82312	7.1526	8.02403	8.04972	8.15505	7.38244
7893026	4.8343	4.93256	5.04413	5.18774	4.93375	5.18471	4.74573	4.96728	5.36659	4.91264	5.68648	5.13168	5.03063	5.0836	4.75676	5.1073
7893027	5.16037	3.89951	5.6363	5.11959	5.55751	5.50268	5.37419	5.56855	6.76843	5.85954	5.17466	5.93359	5.53268	4.66389	5.68039	5.52352
7893028	5.09772	3.66337	3.26627	4.15694	4.25225	4.20785	4.89989	4.82517	3.92888	4.80954	3.24467	4.71584	3.85778	4.01651	4.44907	3.86638
7893029	8.54476	8.84634	9.15187	9.34661	9.18957	8.74301	8.77534	8.21422	9.39486	8.73476	9.10531	8.8843	8.90448	8.95266	8.61355	8.91897
7893030	3.60963	4.62298	3.86104	4.42985	3.84769	4.37096	3.79054	4.82077	4.00293	4.47174	4.1992	4.62643	4.24298	4.34728	3.61755	4.35846
7893031	7.53814	7.37835	8.09015	6.96257	7.38981	7.25428	7.44577	7.2505	7.43321	8.04738	7.05666	7.25871	8.34165	8.15989	7.71053	7.85685
7893032	6.94347	7.54992	7.5183	7.40791	7.42856	7.38262	7.42434	7.30936	7.20318	7.74095	7.28992	7.55434	7.11762	7.68678	7.8211	7.10418
7893033	6.49749	6.05109	7.06058	7.12801	7.37999	7.44208	6.95255	6.37976	6.91142	7.66593	7.20165	7.81716	6.83394	6.53871	6.52868	8.28833
7893034	6.32429	5.62525	5.80759	5.67502	6.08347	6.51217	6.13772	6.65333	5.22774	5.67632	5.54941	6.39633	4.73518	5.76846	6.37967	6.63619
7893035	3.9168	5.04714	5.43112	5.57882	4.65549	4.64141	4.79263	3.91915	4.62584	4.98926	4.85761	4.75016	4.71647	5.29693	4.58788	4.80496
7893036	7.1511	7.14609	7.56303	7.53526	6.81866	7.64455	6.91575	6.96289	9.05	7.7269	7.31727	7.78955	7.80278	7.36091	7.28479	7.97615
7893037	6.59221	6.25704	6.08695	5.87589	5.86071	6.69079	6.30553	6.49481	6.12282	6.51558	8.38179	6.41036	6.3831	6.53428	6.40826	6.64568
7893038	4.44767	3.68277	3.45143	3.60998	3.49757	3.48443	3.96778	4.18507	4.11116	3.72678	3.7296	3.77452	3.35644	3.80207	4.2595	3.56935
7893039	9.7318	9.36062	9.12568	9.51114	9.8281	9.73547	9.60821	9.37853	8.40759	9.27558	9.75698	9.577	9.06747	9.53808	9.77596	9.21414
7893040	8.07707	5.06705	6.20617	7.06059	7.19382	7.43143	7.61322	7.77905	6.81455	7.27843	6.93343	7.25621	6.95771	7.84621	7.09177	6.92398
7893041	3.05656	3.05244	3.00878	2.7746	3.10271	3.08019	3.09205	3.19908	3.18423	3.14569	2.76161	2.94151	3.19206	2.84776	3.17258	3.22857
7893042	8.82614	7.4776	7.94833	8.5083	9.40428	8.86633	8.70872	8.42096	7.76141	8.69745	8.90281	8.54475	7.44599	8.52214	8.3267	8.33245
7893043	6.69253	6.60588	6.71075	6.55671	7.16539	6.52536	6.76574	6.71717	6.09085	7.2516	5.53168	7.09231	6.61938	6.52334	5.97781	6.76167
7893044	3.48839	3.00335	2.95595	2.92861	2.95697	2.8998	3.34847	3.12903	3.51728	3.08671	2.88285	3.10061	3.05656	2.90919	3.19807	3.12107
7893045	2.69131	2.55249	2.662	2.63143	2.72249	2.58076	2.71509	2.89945	2.55672	2.77673	2.5063	2.47176	2.75641	2.69822	2.68804	2.86472
7893046	4.32117	3.9013	3.92071	4.01945	4.06582	3.72854	4.14738	4.1271	4.19859	3.97761	3.71039	3.84891	3.85218	4.03154	4.00224	3.74856
7893047	5.27446	3.97282	3.90675	4.36572	4.58769	5.31836	5.54004	4.68616	8.3798	5.21133	4.17434	4.5515	4.35722	4.77634	4.69829	4.05747
7893048	7.8589	5.96539	6.44112	7.54768	8.24743	8.09186	7.1548	7.503	5.9926	7.67936	7.7783	7.41712	6.31452	7.92422	7.13194	7.25526
7893049	4.34765	3.17307	3.05176	3.60692	4.70594	4.64079	4.86393	3.84813	3.82076	4.38622	3.51075	4.48241	2.98837	4.30218	4.21906	4.14196
7893050	8.82064	9.2418	9.15478	8.69985	8.75016	8.69133	9.40617	8.91689	7.89766	9.62594	9.09221	9.17832	9.36411	9.19858	8.76144	9.33132
7893051	4.45331	4.1524	3.83921	4.3747	4.37497	4.13097	5.01557	4.18939	7.38268	4.79692	4.42388	4.28721	4.1431	4.54982	4.33481	4.48765
7893052	3.70933	3.82283	3.90183	3.73551	4.09879	3.67034	3.82333	3.77732	3.92722	3.77002	4.29529	3.57564	3.65324	4.00659	3.46699	4.04454
7893053	4.25563	3.88543	4.51979	4.15561	4.23661	4.22137	4.03268	4.49775	3.88593	4.39341	4.58675	4.33671	4.12341	4.30507	4.22719	4.7182
7893055	7.71009	6.92406	7.12272	7.12077	6.8816	6.98321	7.68271	7.09216	6.4041	6.73941	6.0562	7.68522	6.65666	7.22693	7.308	7.90157
7893056	5.1519	5.03221	3.79403	4.00289	3.88463	4.91442	4.32493	5.18042	3.20845	4.50405	4.63315	4.12401	4.43082	4.12708	4.38622	4.38474
7893057	3.08781	2.94769	3.02818	3.05893	2.92	2.7128	3.20675	3.74545	3.36837	3.42737	3.36554	3.07435	2.97048	3.00825	2.94923	3.08448
7893058	8.68695	8.91072	9.08137	8.13272	8.33921	8.27679	8.11837	8.33859	7.40447	8.70197	8.92578	8.59954	9.45738	8.85199	8.39367	8.43454
7893059	3.77988	3.64046	3.8592	3.96611	3.99957	3.43812	4.17591	3.73037	5.86572	3.99523	3.75898	3.80626	3.60555	3.54104	4.05894	4.21863
7893060	5.01055	3.87887	4.3648	3.40405	3.88039	4.20484	4.31828	4.27604	4.28155	4.58219	3.70022	4.11615	3.78995	4.39306	4.81154	4.56176
7893061	8.39368	8.58174	9.42764	9.15608	8.5009	8.96825	8.19868	7.91875	8.96219	9.00864	7.99852	9.53758	9.41793	9.05231	8.93933	8.70299
7893062	4.09029	3.38997	3.38335	3.4607	3.71774	3.57278	4.60266	4.14962	3.55991	4.21905	3.99694	3.8288	3.32673	3.78531	4.23278	3.7437
7893063	5.03584	5.16519	5.19586	5.08371	5.47534	5.19446	4.67379	5.4001	6.74709	5.89474	4.8789	5.35686	4.89781	4.99553	5.29124	4.85936
7893064	7.66324	7.9436	8.09799	7.78353	7.5907	8.06171	8.03496	8.0657	8.66025	8.38128	7.02638	8.2815	7.77146	7.72626	8.12014	8.19211
7893065	3.17148	3.14767	3.44953	3.21734	3.79569	3.17379	3.59507	3.78483	6.33663	3.80741	3.45444	3.56351	3.23735	3.56891	3.48236	3.3708
7893066	3.08967	2.91779	3.05492	3.04128	3.02673	3.10644	3.15133	3.91936	3.67897	3.15667	3.11716	2.90109	3.31577	3.1006	3.14397	3.06696
7893067	8.40059	6.86875	7.37605	8.12746	8.66607	8.41939	7.81474	8.19711	7.66399	8.04524	7.9645	8.20945	6.6587	8.11591	8.05665	7.60841
7893068	5.84371	5.58998	5.9498	6.2438	6.12755	6.2397	5.59662	6.06616	5.31305	6.15719	7.22184	5.84346	5.62182	5.98878	5.78343	6.13527
7893069	6.18692	5.31512	5.46921	5.98839	6.6412	6.21374	6.3336	6.49573	5.21519	6.89577	5.63058	6.41433	5.49257	5.73324	6.54687	6.02212
7893070	10.8001	11.4994	10.8925	10.9329	11.0755	10.6135	10.9999	10.8322	9.76295	10.3458	10.801	10.5171	11.0733	10.894	10.2694	10.8975
7893071	6.67529	6.33477	6.19784	6.19716	6.20133	6.12165	6.5784	6.36163	5.30514	6.44635	6.59081	6.03582	6.00857	6.46973	6.47494	6.60362
7893072	4.91408	4.57262	4.86888	5.13821	5.78474	5.73096	4.79233	5.12294	5.47214	5.95159	7.27137	5.695	4.92793	5.37768	5.04176	5.68951
7893073	10.3333	9.9987	10.0688	9.8898	9.80424	10.0535	9.62981	9.90578	9.57488	10.3985	10.2941	9.99788	9.99482	9.84808	10.6457	10.3515
7893074	7.26268	8.22556	6.88601	6.87077	7.99083	7.18395	7.40606	7.01393	6.64287	7.23815	6.41731	7.70579	7.17163	7.05958	7.14354	7.64447
7893075	7.8827	5.47366	6.52436	6.86088	7.39613	7.01273	7.15607	7.44171	6.09785	7.2993	6.34111	7.48908	6.99458	8.04385	6.3183	5.39721
7893076	3.97152	3.28089	3.90016	3.59078	4.11239	3.28516	3.57208	3.81414	3.61227	3.22952	4.17412	3.92696	3.89356	3.46713	4.1202	3.95821
7893077	12.1706	11.0207	11.3429	11.7798	12.2501	12.0607	11.8765	11.9796	11.6419	11.8309	11.8333	11.7313	10.9922	11.8931	11.9293	11.5388
7893078	2.8538	2.80648	2.8734	2.65414	2.68947	2.82318	2.84689	3.1344	2.809	3.12652	2.86756	2.72171	2.84112	2.8734	3.08908	2.80232
7893079	8.17003	8.00361	9.28858	8.70505	8.8	8.63988	8.47985	8.63802	9.25439	8.74161	9.09279	9.28151	9.08553	8.55188	8.65385	8.52919
7893080	3.0394	3.36946	3.51661	3.37093	3.20894	3.66314	3.92342	3.38227	4.23368	3.41256	3.19326	3.30135	3.40965	3.52369	3.86331	3.28949
7893081	10.3241	9.53406	10.423	10.6004	10.4132	10.3077	10.1773	10.2085	9.80546	10.3923	10.3267	10.4034	10.5247	10.4434	10.5174	10.3281
7893082	4.4633	4.70276	4.44878	5.10751	4.91714	4.68011	4.45916	4.23775	9.21279	5.25332	5.38664	4.50287	4.38905	4.96536	4.45136	4.49915
7893083	6.06602	4.39259	4.99561	4.51013	5.18705	5.59161	5.13966	5.22811	4.89905	5.05011	5.83985	5.8169	5.42642	5.65028	5.00796	5.89939
7893084	8.98576	8.5382	8.65148	8.97989	8.29309	8.31934	9.19608	8.98614	7.98405	8.86837	8.59402	9.01924	9.21346	9.25845	9.08861	8.72798
7893085	9.95479	7.57197	8.19213	9.59817	10.2724	9.73712	9.41871	9.80818	8.72296	9.66687	9.04233	9.425	7.7016	9.60604	9.4579	8.94636
7893086	7.01111	7.94853	7.48978	8.12979	7.42018	7.41577	7.75945	7.18413	7.76397	6.85325	6.67183	7.5115	7.91706	7.12258	7.51979	6.83238
7893087	9.3513	10.2817	10.3665	10.1542	10.101	10.2079	9.81427	9.40658	9.42381	10.1776	10.0518	10.6143	9.99084	10.1478	9.43085	10.0541
7893088	5.44519	5.90717	6.33787	5.31596	4.42524	5.84037	4.4811	4.66669	6.94305	3.79036	3.69177	6.35797	5.88992	4.7884	4.74479	5.91839
7893089	5.41892	6.04681	5.64813	5.91041	6.77009	5.30157	5.39746	4.93033	5.39235	6.31077	6.52675	6.27383	6.05565	6.41944	5.91063	6.38365
7893090	10.4366	10.3207	10.6961	10.359	10.4227	10.3071	11.3474	10.5741	9.85989	11.0316	11.0824	10.8048	11.5218	10.888	10.8874	10.5578
7893091	8.09547	9.1648	8.16155	8.10634	7.9998	8.2925	9.18364	8.80468	7.96821	8.7667	8.92862	8.6983	8.66461	8.49083	8.2979	8.22868
7893092	4.02421	4.35609	4.75459	4.65186	4.35388	4.82235	3.90305	4.49431	4.1118	5.01172	4.79675	4.62914	4.12745	4.60011	3.64061	4.38723
7893093	3.31758	3.42041	4.02742	3.75948	3.98603	3.44666	3.61913	3.90448	3.81491	4.0637	3.15718	3.70263	3.28946	3.41733	3.7554	4.25548
7893094	10.1594	10.3004	10.359	10.5072	10.9432	10.4957	10.6581	10.2404	9.66326	10.6179	10.8791	10.6974	10.5692	10.6222	10.2727	10.3692
7893095	3.74513	3.52712	3.6786	3.37813	3.50503	3.56492	3.31358	4.1122	5.06142	3.45277	3.12986	3.68569	3.78439	3.61921	3.54599	4.101
7893096	9.40202	7.60147	8.05955	9.15366	9.94987	9.39643	9.2179	9.38941	8.52763	9.31526	9.19999	9.32805	7.71904	9.49724	9.2147	8.33281
7893097	8.59865	8.39173	8.75748	8.41276	8.52498	8.46976	9.06908	8.76399	8.34375	8.67087	7.61917	8.4004	8.94	8.73157	8.65036	8.55235
7893098	6.72742	7.48133	6.94852	6.78326	7.9312	6.31927	7.09878	7.52325	6.41478	7.08718	5.56193	6.85654	6.9741	7.13458	7.08764	7.24121
7893099	5.14522	5.03733	5.10038	4.71919	5.1981	5.1884	5.7717	5.87497	2.97782	5.31521	5.11968	5.21179	4.67514	5.26789	5.22847	5.32821
7893100	5.2435	6.15903	5.79124	5.76151	6.13328	5.55923	5.26582	5.6019	5.56976	5.924	5.00288	5.92914	5.42203	5.33262	5.85148	5.23755
7893101	12.0152	10.7671	11.2578	11.7592	12.3924	11.9558	11.9704	11.983	11.2518	12.0106	11.7374	11.7118	10.8797	11.9293	11.9377	11.2121
7893102	4.80923	4.21077	4.07361	4.1541	5.43303	3.99933	5.82611	6.6688	5.32422	6.33548	4.01503	4.16823	4.51851	4.99062	5.63197	5.59011
7893103	11.5179	11.7838	11.7863	11.748	11.723	11.8009	11.5624	11.4671	11.4434	11.5667	11.2539	11.7111	11.6796	11.5004	11.8114	11.6943
7893104	8.70277	9.02298	8.21398	8.21244	9.02603	8.47732	9.16843	9.19247	6.8371	9.52535	6.17226	8.07998	8.2033	8.14385	8.36915	9.29081
7893105	9.29879	8.2141	8.19291	9.08081	9.76912	9.00446	8.90734	9.1064	7.90015	8.97053	8.54627	8.72362	7.96857	8.97626	9.09313	8.59908
7893106	6.39012	7.19619	7.1091	7.65911	7.56831	7.16726	5.98273	6.84684	7.92589	6.55613	7.8521	6.98552	6.677	7.25423	6.76087	6.59263
7893107	3.32293	2.86824	3.18115	3.20225	3.25645	3.27407	3.0358	3.15645	3.14568	3.15073	3.44762	3.35488	3.08375	3.0938	3.21692	3.26521
7893108	3.80337	4.1899	3.41132	3.79482	3.52809	3.42508	3.24252	3.66398	4.19134	2.92032	2.76017	3.7424	2.974	3.45499	3.22363	4.95765
7893109	4.61074	3.40625	3.79848	3.55677	3.53059	4.21119	5.18552	4.25274	5.91234	4.44678	4.90851	4.1443	3.90645	4.20451	4.39861	3.76255
7893110	5.64355	4.73614	5.26091	5.98486	5.07539	5.27687	5.73817	5.78092	6.21144	5.90114	6.02547	5.85912	5.22934	5.60108	5.3481	5.70856
7893111	6.77157	6.91379	7.38741	6.06086	7.59922	7.14099	7.36357	6.86604	6.44789	7.82489	5.84223	7.82052	6.92744	6.9272	7.37095	7.54467
7893112	6.80631	5.81348	6.52362	5.54546	5.55964	5.97005	6.28911	6.19507	5.59216	6.13584	4.38043	6.66224	6.08901	6.58556	6.39885	6.81352
7893113	7.43447	7.0873	7.2835	7.10557	7.26772	7.22489	7.19974	7.50491	7.36402	7.48445	7.62446	7.72988	7.69002	7.778	7.6576	7.30067
7893114	4.15545	3.76909	3.88227	3.83917	4.04511	3.77731	3.96755	4.15373	4.44149	4.01288	4.09511	4.07522	3.65624	3.77038	3.6868	4.31849
7893115	5.85112	5.0359	5.40483	4.65145	6.09252	5.2825	5.56449	5.20699	4.15491	5.34061	3.24055	5.66763	4.04607	4.59397	5.49639	5.56666
7893116	9.14924	9.11392	9.25862	9.19061	9.69302	9.21389	8.35709	8.91325	9.92403	8.74374	8.87078	8.93201	9.05523	9.2987	8.80621	9.26217
7893117	3.07591	2.95083	2.82208	2.88446	2.89784	3.07083	3.12096	3.03706	2.91723	3.16788	4.29235	3.00324	3.11447	3.07907	2.7976	3.03739
7893118	6.67096	7.55593	6.90243	7.20696	6.82375	6.56182	7.19688	7.59633	6.75513	7.42979	4.99615	7.2605	7.09398	6.65336	7.11474	7.56057
7893119	6.05183	4.96016	5.97135	5.75639	5.93861	5.76103	5.83928	4.89714	5.49693	6.01159	5.62783	5.35449	5.91707	5.94202	6.11564	5.87931
7893120	4.28341	4.0918	3.82303	4.12734	3.73719	3.56003	4.42719	4.21339	3.23465	4.14956	3.95265	3.9459	3.78553	3.78627	4.37105	4.17491
7893121	9.44958	7.74318	7.97136	9.11335	9.91437	9.4636	9.14343	9.21004	8.30955	9.396	8.53618	9.08342	7.68861	8.98106	9.12526	8.75895
7893122	8.66712	7.15297	8.1432	7.91041	8.09169	8.34892	7.84872	8.06427	11.2626	8.36442	8.66949	8.44725	8.15218	8.30963	8.1333	8.44368
7893123	8.26584	8.80246	7.94407	7.99692	9.07223	8.92539	8.51484	8.86342	7.45347	8.49729	7.30563	8.37617	8.35382	8.39246	8.39766	9.19508
7893124	4.73913	4.51567	3.87357	4.16733	4.48173	4.82081	4.29902	4.18094	3.84015	4.80422	4.7099	4.34394	3.99246	4.25503	4.56472	4.73656
7893125	7.47436	7.22997	8.08074	7.44924	7.72949	7.5698	7.66065	7.46583	10.273	7.96525	8.39917	8.24175	7.95539	7.89447	8.17622	7.55686
7893126	3.91776	3.70612	3.83195	3.92636	3.64471	4.02392	3.66413	3.42758	4.70646	4.04173	4.33309	3.81091	3.81103	3.67974	3.95337	3.99036
7893127	4.06664	3.83237	4.32795	4.12283	4.63644	4.07268	4.93716	4.18549	4.30723	4.24734	3.49894	3.9883	4.91049	3.82421	4.4536	4.34889
7893128	4.21019	4.09507	5.15345	4.03621	4.61589	4.58574	4.47891	4.38599	5.41036	4.77014	4.12979	4.92152	4.8444	4.4423	4.66134	4.29911
7893129	4.75399	4.61536	5.19321	4.63998	6.03216	4.73565	4.36489	4.37621	4.63354	6.27599	3.48167	4.9893	5.45494	5.41384	5.25594	5.48237
7893130	10.2743	9.82737	9.37075	10.1418	9.84815	9.96464	10.341	10.2142	10.4241	9.46612	8.95839	9.52635	9.33943	9.67376	9.98504	10.097
7893131	9.12723	9.06396	9.36716	9.16092	9.07047	8.91912	9.04209	9.01342	7.73171	9.14417	8.17731	9.14434	9.02764	8.94809	8.25793	8.99035
7893132	5.01134	3.39911	3.77306	3.91084	4.15007	4.18484	3.88769	3.88691	3.4244	4.60256	3.8318	3.71558	3.72426	4.03423	4.27372	4.02375
7893133	11.5601	11.7721	11.5692	11.1226	11.5643	11.3778	11.6397	11.5401	10.7528	11.6108	11.2717	11.5367	11.4624	11.5952	11.5745	11.5008
7893134	6.38672	3.89969	5.88154	6.18751	6.40011	6.33442	6.85448	6.47158	4.77624	6.70838	6.13172	6.3502	5.83501	6.31082	6.84979	6.01186
7893135	2.49038	2.63258	2.97442	2.74207	2.71167	2.62917	2.95465	3.04213	2.67472	2.79557	2.45128	2.50391	2.61476	2.73363	2.72278	2.71014
7893136	3.64	3.10783	3.53156	3.31484	3.63437	3.05686	3.26241	3.61858	2.60966	3.13605	3.20039	3.34141	3.08489	3.29603	3.26449	3.04718
7893137	4.36917	3.28934	4.24101	4.03354	4.54592	4.34696	4.63856	4.20289	4.85451	4.96302	4.32653	4.03846	4.68307	4.55949	4.76861	4.79675
7893138	11.9262	11.6871	11.8651	11.7399	11.9351	11.8398	11.8381	11.8257	11.6433	11.8885	12.0048	11.9993	11.78	11.7961	12.132	11.9588
7893139	11.2337	11.533	11.6438	11.3536	11.2641	11.3606	11.232	11.1267	10.5337	11.6038	11.471	11.7436	11.4437	11.4203	10.894	11.3124
7893140	10.4025	8.14196	8.80111	10.1747	10.893	10.6029	10.3227	10.4298	9.76288	10.519	9.98683	10.2136	8.44947	10.4786	10.2846	9.46414
7893141	7.91086	8.7985	8.2841	7.88719	8.862	8.24105	8.12144	8.54479	6.63669	8.2447	6.26621	7.98333	8.012	7.96407	7.9012	8.27688
7893142	7.46464	6.16144	6.94696	6.93169	7.5579	7.28457	6.83224	6.40026	4.78639	6.9072	4.5742	7.1005	6.38252	6.90779	7.19389	7.20749
7893143	4.28567	3.03072	4.00325	3.87297	4.57777	4.31335	4.618	4.11987	4.23752	6.04364	3.21506	5.01234	3.73869	3.90374	3.62104	4.52789
7893144	3.64967	3.81873	3.76696	3.58007	3.65352	3.88527	3.32235	3.29742	3.12119	4.12009	3.87588	3.51725	3.52283	3.58248	3.51928	3.4317
7893145	5.4402	5.02506	4.81631	5.10931	4.32481	6.25597	5.50841	5.95077	4.70594	5.89833	6.87347	5.47492	5.89548	4.52508	6.14183	6.25879
7893146	4.70204	4.10355	4.33771	4.47818	4.69118	4.25812	4.45232	4.26194	4.15614	4.73551	4.30454	3.94762	4.73236	4.51745	4.59782	4.54162
7893147	11.9098	10.3174	10.8821	11.5325	12.041	11.8039	11.6838	11.6654	10.903	11.6476	11.4068	11.4114	10.6206	11.7319	11.7741	11.0872
7893148	8.18872	7.70994	8.04961	8.48703	9.06399	8.45399	8.01009	8.17791	7.43687	8.29605	8.14134	8.39315	7.48187	8.09599	8.14319	8.04363
7893149	4.26107	3.7934	3.92029	3.92867	3.93897	3.90589	4.3258	4.00065	3.44005	4.81426	3.57111	4.53119	4.47748	4.33951	4.65374	4.54047
7893150	7.57787	6.80212	6.87706	6.58054	6.7646	6.88667	6.73273	7.08988	5.86143	5.84884	4.32282	6.96979	6.29855	6.63506	7.0549	7.38626
7893151	6.2382	6.1246	6.3595	6.20369	6.34449	6.15699	5.86658	5.96724	5.83144	6.24963	6.06464	5.82098	6.13302	6.09916	6.03962	6.55831
7893152	10.4111	9.70695	10.0119	10.3193	10.7683	10.1435	10.0327	10.0157	9.82274	9.94803	9.83287	10.0968	9.77151	10.1543	10.1376	10.14
7893153	10.3753	11.155	11.0714	10.703	10.842	10.3913	10.8759	10.8747	10.9053	11.2544	11.0097	10.7142	10.9648	10.9774	11.1046	10.7441
7893154	6.88235	6.62463	6.06143	5.97458	6.85054	6.61871	7.47758	7.78473	5.85152	7.36767	4.14632	6.11583	5.03675	6.24558	6.88715	6.38818
7893155	6.42906	6.25314	6.13003	6.41205	5.77036	5.68511	6.56777	5.8126	8.19949	5.16046	4.36809	6.2298	5.62758	6.02999	6.3861	6.11584
7893156	5.41245	6.29615	5.28298	5.07828	5.91175	5.37895	6.13783	6.26791	4.40681	5.8106	4.0177	5.81389	5.54639	5.36671	5.35187	7.05644
7893157	2.87661	2.82767	2.87614	2.71018	2.9991	2.85381	3.19205	2.97763	3.02227	2.83778	2.82243	2.75124	3.00646	3.01759	2.92921	2.92381
7893158	6.23166	6.16934	6.01246	6.24327	6.35972	5.68969	6.13332	6.3168	7.15641	5.83654	5.35021	5.58889	5.54476	6.12497	6.40473	5.66356
7893159	6.31233	4.22661	5.51564	5.49088	5.05851	5.52575	6.13149	5.91783	5.23324	5.69657	4.45797	5.60021	4.87387	5.0437	5.29634	5.70265
7893160	8.25378	8.70652	9.1399	8.6506	8.77075	8.77153	8.4488	7.96763	8.26465	9.03325	8.45181	9.11963	8.78542	8.46418	8.78084	8.82708
7893161	3.16113	2.80198	2.86046	2.74629	2.86917	3.10135	2.86081	2.86729	2.98445	3.05643	2.81256	3.08085	2.66577	2.77431	2.80142	3.01552
7893162	6.05777	5.84502	5.96613	6.06795	6.53956	6.00606	5.51555	5.83122	5.23098	5.6101	4.84039	5.99734	5.26572	5.54615	5.72791	6.18332
7893163	3.26794	3.23026	3.43263	3.34294	3.15877	3.13269	3.3719	3.11173	2.73411	3.26669	2.91747	2.99593	3.32914	3.14141	3.21957	3.27685
7893164	9.36457	9.37917	9.38174	9.55293	9.55374	9.03504	9.70347	9.40421	8.62017	9.1744	7.69236	9.65124	8.9287	9.39996	9.71641	9.52033
7893165	6.39294	5.39314	5.56167	5.68798	6.65561	5.82798	6.07687	6.06178	5.22191	6.47615	5.19748	6.2995	5.28375	5.99989	6.06903	5.28036
7893166	3.59188	4.83291	3.78458	3.90184	4.05343	4.37729	4.45801	4.43546	4.21416	3.51723	4.93267	3.98643	4.1684	4.52616	3.84165	4.17269
7893167	4.64802	4.70311	5.20122	4.86029	4.74816	4.58641	4.56007	4.69056	4.46462	5.02269	5.23357	4.98621	4.4007	4.49727	4.59499	5.28051
7893168	7.76206	5.82036	5.95724	6.63505	6.71994	7.39342	7.0911	7.47758	7.15025	6.36988	6.17993	7.01562	4.65657	6.82843	6.72318	7.107
7893169	4.5589	4.17906	4.5797	5.15619	6.79438	5.68979	6.08326	5.69166	4.23165	6.98025	5.85298	5.93863	4.18215	5.48173	5.54158	4.2573
7893170	6.1465	7.38543	7.35035	6.50234	6.23339	6.90551	7.28083	5.97673	6.65113	7.51579	5.80247	7.27852	7.66938	7.06186	6.19786	6.77807
7893171	7.51214	6.84042	6.90418	7.52531	8.49443	7.73445	8.20583	7.96498	6.5977	8.83899	6.74338	7.38658	6.97541	7.29971	7.21481	8.2713
7893172	7.28326	7.11883	6.67498	7.07464	7.55456	7.45729	7.52471	7.67671	10.1455	7.32778	6.86916	7.35465	6.22396	7.17319	7.40498	7.94205
7893173	11.1095	10.7311	11.3836	11.1454	10.7365	11.1058	11.1187	11.2006	11.1815	11.2845	11.1949	11.0847	11.2064	11.3669	11.133	10.5849
7893174	2.69036	2.61852	2.72232	2.67463	2.71799	2.71919	2.94526	2.64895	2.82139	2.74036	2.73715	2.60442	2.64473	2.9301	2.91217	2.48082
7893175	3.32745	4.39349	3.79267	3.86514	4.08963	3.81326	4.21906	3.63221	7.83057	4.05528	3.18104	3.833	4.09079	3.17694	3.82093	4.41073
7893176	2.75879	2.65036	2.82229	2.97559	3.1077	2.90883	2.84594	2.76359	2.995	2.80102	2.80916	2.72436	2.8016	2.76847	2.75813	2.68869
7893177	3.95939	3.38401	4.151	4.30635	3.833	4.14607	4.36505	4.66364	8.03934	4.29853	3.9246	5.8384	4.85945	4.18478	5.39113	5.76604
7893178	3.77372	3.01335	3.14042	3.15614	3.15363	3.36472	3.5561	3.95431	3.78826	3.63395	3.00095	3.539	3.1559	3.11672	3.39889	3.31538
7893179	5.32979	5.61643	5.26466	5.2286	5.36476	4.84174	5.16479	5.28814	5.0313	4.87918	4.92767	5.37026	4.51724	5.30537	5.32313	5.08656
7893180	5.12265	5.07659	5.53838	5.76648	5.62775	5.64912	5.5883	5.67406	4.57318	5.78464	5.85253	5.45993	4.83329	5.64946	5.06079	5.42584
7893181	7.88026	7.2519	7.49702	7.72972	7.68623	7.57704	7.98209	8.35722	6.93311	8.281	7.85627	7.35902	7.79597	8.1513	7.7942	7.64528
7893182	6.8483	6.63777	6.52034	6.8009	7.27986	6.7993	6.47651	6.23037	5.70832	6.68597	6.2318	6.97747	6.23011	6.95562	6.97017	7.04995
7893183	4.05297	3.74221	3.6794	4.51316	4.21178	3.44567	4.25713	4.98705	3.3698	4.71141	4.22578	3.90968	3.71407	4.29708	4.46011	3.72809
7893184	7.5598	8.04855	7.56369	7.09858	7.35372	6.88175	7.50553	7.45757	8.14282	8.12227	7.28754	7.4503	8.06006	8.02846	7.20838	7.58602
7893185	5.49663	5.78891	5.22621	5.46649	5.49921	5.14758	5.90236	5.85839	5.84838	5.8919	5.55854	6.06337	4.48573	4.47849	5.14522	6.33496
7893186	4.20694	4.65952	5.03582	4.34333	3.92893	4.59397	4.5273	4.0457	4.99588	4.76392	3.74924	5.78153	4.98247	4.56936	4.84268	4.8006
7893187	7.77249	8.83749	9.10044	8.60309	8.26848	8.28416	8.76718	7.66456	8.86042	8.19723	7.96741	9.00513	9.20416	8.6798	7.7215	8.53687
7893188	6.87959	6.02867	5.44912	6.16907	6.31206	6.29103	6.36214	6.93184	4.58748	6.41306	5.22279	5.44295	5.58947	5.90767	6.76899	6.58908
7893189	11.9213	11.2301	11.3628	11.869	12.133	11.9527	11.8647	11.9602	11.5309	11.99	11.6378	11.8796	10.8612	11.6374	11.787	11.7486
7893190	5.30145	5.32661	5.72339	5.99701	6.44469	5.7102	5.19893	5.71238	5.24247	5.45782	5.06186	6.17152	5.52415	5.3685	6.12744	6.0074
7893191	10.8058	10.7308	10.7918	10.8184	10.9854	11.086	10.6356	10.8244	10.763	11.05	10.9713	11.0882	10.8887	10.8674	10.9134	11.161
7893192	3.27316	3.85621	3.55487	3.61846	3.4792	3.76811	3.90403	4.16626	3.73018	4.03065	3.98256	3.59995	4.09696	3.70717	3.68331	3.92299
7893193	3.26685	2.74657	2.92636	2.81931	2.66107	3.52393	3.49562	3.19589	4.19134	3.51869	3.54331	3.97858	3.1034	3.68914	3.78851	3.05787
7893194	8.56041	9.04905	8.75262	8.85035	8.55651	7.87426	8.42171	9.01866	6.94561	8.72695	8.36537	8.41989	9.06193	9.15724	9.03983	8.27229
7893195	4.01392	3.5967	3.67953	3.77	3.3983	3.79135	3.9017	3.89708	3.44978	4.17743	3.58633	3.79777	3.46252	4.0636	4.24218	3.96875
7893196	9.80182	9.63906	9.56701	9.95722	9.85682	9.19046	9.78384	9.73822	8.18396	9.42359	9.36443	9.25735	9.53173	9.6754	9.94451	9.3311
7893197	3.09553	2.99041	2.73846	2.84125	3.01664	2.66103	3.49207	3.04523	2.70495	2.99888	2.56255	2.9149	2.84751	3.02701	3.23525	2.76014
7893198	3.84724	2.967	3.07005	3.00024	3.27708	3.11298	3.72862	3.3852	3.25756	3.29086	3.18753	3.18556	3.18791	3.33547	3.28397	3.10366
7893199	2.83273	2.56434	2.82648	2.61675	2.68223	2.60558	2.5787	2.79241	2.97186	2.7897	2.62589	2.79107	2.54442	2.59442	2.61744	2.9119
7893200	3.43663	3.12739	2.97119	3.02015	2.95657	2.95453	3.32479	3.20568	3.60962	2.97381	3.27237	2.98942	2.98522	2.95597	3.06867	3.13544
7893201	9.00777	9.98221	10.0173	9.21349	10.0109	9.39514	9.71887	9.80884	9.30967	10.375	10.0326	10.3141	10.2746	10.1615	9.87161	9.87334
7893202	7.86515	7.47434	7.61457	6.78063	7.67388	7.1396	7.73878	7.85637	6.56535	7.99422	6.32333	7.94182	7.27796	7.47439	7.94987	7.97911
7893203	3.56026	2.83697	3.09522	2.69805	2.93162	2.91855	3.22217	3.27554	3.14638	2.86152	2.86416	2.92434	3.0541	3.0006	3.16401	3.52448
7893204	7.05573	7.90492	6.5564	7.01306	7.82102	6.61515	7.23947	7.18305	4.59988	7.31592	3.43118	6.22067	6.20446	6.47094	6.08883	7.27092
7893205	9.90338	10.3793	10.5295	10.4251	10.4884	10.5455	10.1203	10.1273	9.41922	10.2298	10.7972	10.6904	10.2123	10.4197	9.92486	10.4105
7893206	6.79802	5.41964	5.78063	5.70151	5.92565	5.84735	6.43653	6.45744	5.22096	6.1972	4.64178	5.42172	6.3173	6.77126	6.95231	5.96233
7893207	6.50468	6.48251	6.74034	6.8363	6.86088	6.56346	6.30844	6.20745	7.81772	6.8478	6.32687	6.45185	6.46903	6.8364	6.90976	7.16908
7893208	8.95613	9.10062	9.08945	8.15025	8.41565	8.43783	8.54068	8.65824	7.83645	8.83305	8.39009	9.32766	9.06669	8.09498	8.77703	8.90946
7893209	6.33889	5.72524	5.81891	6.34302	5.79849	6.36554	5.43802	5.64476	5.39599	6.08294	6.56524	5.86617	6.19133	6.44287	6.3252	6.27742
7893210	6.51732	6.22784	5.7881	5.98279	6.05288	7.106	6.52311	6.79007	7.08096	6.73128	7.54699	6.66217	6.36052	6.66921	6.72944	7.52786
7893211	3.32295	3.17392	3.67554	4.13345	3.42027	3.39397	3.2	3.14806	3.30095	3.25679	4.69342	3.40958	3.36392	3.46215	3.12745	3.46285
7893212	6.81574	4.96161	5.51898	5.75636	6.97414	7.00538	5.76989	6.24018	5.47055	6.27224	5.94821	6.00162	5.24906	6.29816	5.91269	5.98531
7893213	4.88422	3.42169	4.83671	3.71701	4.60256	3.63127	5.33191	4.57504	3.52804	5.59005	3.85582	4.14496	4.17139	4.94125	4.64725	5.26827
7893214	4.57355	3.27323	3.75939	3.53363	3.99971	3.74872	3.83736	3.29636	3.39515	4.33218	4.0241	3.54397	4.74347	5.21758	3.99971	4.17911
7893215	7.32608	6.99414	6.8123	7.26386	7.55919	6.32555	7.45853	7.83965	6.64477	7.60522	6.2485	6.70956	6.83915	6.69925	7.61491	7.80025
7893216	4.44268	3.70791	5.09497	3.70135	4.15734	3.9316	3.53093	4.14806	3.36241	5.13507	3.19114	4.12607	5.3575	3.95146	4.08094	3.4263
7893217	8.85589	8.77292	8.96385	9.21122	9.00426	8.90457	8.97064	9.5232	8.16962	9.37209	10.1031	8.90777	9.59513	9.47303	9.48049	8.59821
7893218	11.7745	12.0134	12.1346	11.8618	11.9611	12.1536	11.9877	12.0085	11.9747	12.0192	11.9128	12.129	12.1803	11.7849	12.0211	12.0613
7893219	5.84022	5.80562	5.79212	5.13227	5.87406	5.21463	5.95356	5.49868	4.75124	6.34107	4.39041	5.51534	5.39691	5.48678	6.02447	5.64715
7893220	8.79575	6.93565	7.69416	8.74823	9.81715	8.85006	8.90439	8.85603	7.56271	9.09646	8.03846	8.7513	7.05776	8.95836	8.71051	7.72894
7893221	2.96764	2.5825	2.84313	2.84142	2.76826	2.80548	2.95165	2.76511	3.03261	2.80653	2.75927	2.75113	2.74784	2.88042	3.0776	2.76693
7893222	4.56761	3.96918	4.15066	3.79181	4.31805	3.63795	4.12797	3.23222	3.56396	4.38046	3.39374	4.54352	3.31993	3.43839	4.48581	3.70341
7893223	4.28719	3.87454	3.99651	3.99593	3.90102	4.29636	5.20376	4.44215	6.34728	4.65541	5.91631	4.55993	4.17304	4.02458	4.5251	4.75495
7893224	3.82026	4.69008	5.32841	4.44472	4.49889	4.2999	4.55848	3.66462	3.42454	4.83866	4.39633	4.11778	4.31375	4.5686	4.67764	3.971
7893225	6.54501	5.14868	6.49819	5.66176	6.28332	6.20387	6.59472	6.15823	5.24399	6.56318	5.11358	6.42827	6.12602	6.58815	6.87456	6.90086
7893226	3.9123	3.66713	3.35828	3.7443	3.53109	3.8794	4.15476	3.77283	5.02867	4.50451	6.2661	4.25996	4.14397	4.02466	3.95724	4.06018
7893227	7.44164	7.28173	7.62087	7.53851	7.52375	7.37997	6.78104	7.39513	6.92596	7.06001	7.38792	7.77372	7.87399	7.86255	6.9303	7.78518
7893228	6.81316	6.70435	6.36225	6.34838	6.56616	6.5727	6.37509	7.37314	5.72506	6.56766	6.02196	6.42255	5.97816	6.7539	7.25566	6.85876
7893229	5.54186	5.03338	4.19017	4.55277	4.82178	5.05644	4.88762	5.46615	5.50168	5.47521	6.25601	5.25736	4.8235	5.16813	5.38915	5.36224
7893230	3.60963	3.58182	3.29583	2.81931	3.12336	3.59162	4.29717	3.82575	2.76805	3.59084	3.18104	2.98549	3.11136	3.06191	3.3323	3.0888
7893231	11.3839	9.60503	10.228	11.1689	11.7429	11.2013	11.1252	11.2639	10.2927	11.0352	10.9426	11.1881	9.77478	11.2042	11.1585	10.4925
7893232	4.33221	3.8422	4.3722	3.73667	3.69246	4.02363	4.45178	4.05593	5.11877	4.71929	3.66381	3.78075	5.00793	4.76166	4.47946	4.54767
7893233	3.88308	3.24753	3.12231	3.34593	3.41013	3.25037	3.2933	3.35138	3.48844	3.7704	3.3446	3.31063	3.32432	3.43358	3.28075	3.29793
7893234	5.43083	4.65096	5.29275	5.48767	6.01186	5.70208	5.02807	4.42398	5.165	5.35286	5.31054	5.24296	5.10268	5.06183	4.8101	5.79947
7893235	8.7377	8.10517	8.26569	8.52539	8.07542	8.00865	7.95332	8.01164	7.07346	7.86171	7.07257	8.35873	8.06138	7.92649	7.20885	8.86488
7893236	6.24347	6.35355	6.30224	6.64766	6.2415	6.18632	5.75097	6.14779	6.31639	6.13959	6.29803	6.25137	5.95323	6.54791	6.08069	6.3161
7893237	9.25077	8.07909	8.25668	8.88924	9.39446	9.27824	8.56768	9.06789	8.11575	9.1297	9.76927	8.92286	8.24715	9.30069	9.08103	8.61657
7893238	8.31883	8.51031	9.35658	8.80235	8.64407	9.11489	9.73954	8.38235	9.03703	9.62456	9.49567	9.47873	9.47619	9.37493	9.06237	9.05015
7893239	5.97159	5.3756	4.43692	4.79507	5.38136	4.67392	5.44158	5.19328	4.7327	5.76972	4.23661	4.92873	4.02533	5.40718	5.5533	6.01316
7893240	10.428	10.1104	9.60035	10.4551	10.0931	9.9905	10.57	10.881	8.93224	10.4735	10.4486	9.72921	9.73795	10.361	10.6984	9.89267
7893241	5.75979	3.86769	5.21675	5.99047	6.81434	5.89457	6.17249	5.86721	4.22615	6.5785	4.04928	6.30637	5.34219	5.87794	5.72632	5.89757
7893242	9.42907	9.6385	9.253	9.64319	9.49784	9.31231	8.76587	9.04355	10.2335	9.02723	9.91097	8.8733	9.20919	9.0753	9.03889	9.34232
7893243	4.05406	3.82401	4.5563	4.70066	4.8	4.12825	4.64791	4.05431	5.92904	4.52076	3.68593	4.15068	4.32269	3.92466	4.70491	3.84285
7893244	9.4855	8.7558	9.06294	9.56036	9.64587	9.39324	9.79627	10.0645	8.58058	9.43912	9.57434	9.27502	9.07902	9.45892	9.77433	9.62731
7893245	3.98043	3.27112	3.54892	3.38162	3.70493	3.74433	4.342	5.00696	3.94552	5.13285	3.90278	4.06865	4.40895	3.84167	3.81535	4.13422
7893246	5.0986	5.09175	5.19878	5.16657	4.91734	5.66592	6.07664	5.30691	5.0048	5.62203	5.88698	5.27034	4.88597	4.73945	5.33129	6.0007
7893247	9.63524	8.68901	9.05973	9.79415	10.2776	9.89746	9.8171	9.65308	8.64707	9.67525	9.80469	9.76678	8.40436	9.84377	9.71588	9.27476
7893248	8.22793	8.03539	7.98595	8.09211	7.6957	7.67937	7.83043	8.5084	7.54402	8.50598	7.91368	8.10793	8.33313	8.43716	8.46686	8.26045
7893249	5.81955	5.63069	5.5271	5.42694	5.65757	6.08229	5.8086	6.17617	4.76313	5.88702	6.92187	5.94738	5.89524	6.17293	5.79339	6.02628
7893250	5.54209	5.77381	5.34493	4.64777	5.38334	5.60065	5.28373	4.99498	4.92922	4.95815	4.83209	5.1918	5.36754	5.80312	4.9792	5.30072
7893251	3.75553	3.56869	3.78226	3.55518	3.49561	3.77868	4.22235	3.39239	3.83527	3.7917	3.80313	4.53811	4.01648	3.75403	3.60379	4.19461
7893252	3.79069	3.0311	4.01522	3.61999	3.4945	3.51236	3.58795	3.29079	3.32991	3.85276	3.33355	3.67267	3.34821	3.45511	3.76915	3.14638
7893253	4.25206	4.20203	4.75442	4.36517	4.87692	4.34314	4.37923	4.21793	4.60089	4.90686	4.07456	5.4368	4.39392	4.27283	4.36505	4.86745
7893254	5.98418	7.13683	5.8247	5.69345	6.50492	5.47364	7.09828	7.7199	6.07816	7.39931	6.29817	5.63264	6.06098	6.27961	7.09077	5.82593
7893255	6.20885	4.49678	5.44618	5.66423	6.09794	6.23356	5.61956	5.05791	5.21264	5.75869	4.8063	7.00206	5.60807	5.5554	5.08486	5.25354
7893256	4.58364	3.42323	4.48483	4.11689	4.24818	4.3461	4.18449	4.38399	5.49355	5.01359	3.89332	3.88017	4.6357	4.1117	4.18324	4.18742
7893257	7.17468	7.51179	8.14196	7.91054	7.22018	7.37476	7.28345	7.00086	8.15118	7.38172	6.23131	8.29526	7.28437	7.31613	7.22652	7.4354
7893258	8.01462	8.09325	9.02966	8.29729	7.45856	8.44671	7.42672	8.06745	8.10462	8.23102	7.10325	9.19029	9.39323	7.73877	8.28344	8.44233
7893259	6.89158	8.55876	8.35109	7.34095	6.65311	7.43335	8.24657	7.56153	6.86761	8.48608	7.98693	8.58853	8.33985	7.97691	7.78792	7.76082
7893260	4.10382	4.01933	3.91351	4.15322	3.67299	4.58593	4.19849	3.64478	3.01927	3.82011	4.75215	3.55066	4.15828	3.73313	3.52948	4.47862
7893261	10.8982	11.6126	11.6489	11.2951	11.3427	11.1084	11.428	10.9553	11.5714	11.8743	11.2232	11.4936	11.4666	11.3772	11.5476	11.2809
7893262	7.92755	8.67884	9.23249	8.41982	8.59679	8.79054	9.12603	8.02104	8.71294	9.08784	9.48712	9.49305	8.9842	8.71831	8.63802	8.81908
7893263	5.83004	3.84876	4.22289	5.1477	6.15343	5.60227	5.04046	5.65574	5.18608	5.71697	5.3446	5.48684	4.00126	5.59241	5.24455	4.75727
7893264	11.7062	11.6019	11.7596	11.7133	11.7999	11.7186	11.5895	11.8089	11.1818	11.7806	11.6086	11.6738	11.514	11.6695	11.7795	11.8305
7893265	3.76033	3.27313	3.65196	3.47462	3.85415	3.88227	3.66675	4.12008	2.91114	3.60791	3.3892	3.34461	3.75068	3.92945	3.41404	3.77632
7893266	10.2655	10.0197	10.4704	10.324	10.3186	10.4441	10.5012	10.4422	9.48286	10.7313	10.1555	10.4811	10.4335	10.4933	9.80093	10.3642
7893267	3.56141	3.2448	3.88899	4.13366	5.40231	4.40784	5.29651	3.36996	3.16618	4.49118	3.71508	4.23009	3.20777	3.8198	3.38355	3.42392
7893268	7.49984	7.32073	7.49983	6.97816	7.56622	7.38233	8.21798	7.6509	6.81001	8.3477	7.74974	7.297	8.08336	8.03135	7.34463	7.19037
7893269	4.96304	5.49958	5.86458	5.78933	5.84279	5.05127	5.05486	5.02236	4.7045	5.38066	4.99061	4.91814	5.19625	5.26463	5.35732	5.99781
7893270	11.7504	11.978	11.977	12.0626	11.9479	11.9168	11.8313	11.8335	11.8347	11.8663	11.4954	12.1939	12.0769	11.727	11.9342	12.1491
7893271	10.2178	10.5476	10.0036	9.94345	10.4383	10.342	10.713	10.5892	10.3259	11.015	10.3828	10.2014	9.59039	10.3914	10.9788	10.4143
7893272	9.94854	10.0515	10.418	10.8729	10.2446	9.9063	9.83003	10.0633	9.4522	10.1972	9.89474	10.2407	10.9407	10.0247	10.4051	10.1718
7893273	7.78929	5.56988	6.74993	6.86325	6.69721	6.97013	7.27533	7.25454	6.80549	6.98778	6.33012	7.14041	7.23156	7.11312	6.21675	6.75522
7893274	2.62346	2.84924	2.65019	2.64243	2.70881	2.62363	2.67207	2.54781	2.65586	2.48456	2.63327	2.60091	2.57748	2.64709	2.67896	2.45377
7893275	4.24792	3.645	3.83253	3.4796	3.7875	3.66025	4.25464	3.9634	3.91974	4.12566	3.46674	3.57995	3.58736	3.79404	3.6413	3.71099
7893276	3.18054	2.99299	3.16637	3.12163	3.23882	3.13374	3.45324	2.91021	4.52577	3.0482	2.97964	3.00344	2.99136	3.27653	3.58392	3.00477
7893277	4.2102	4.01693	4.17195	4.25849	4.26597	4.20495	4.31982	3.79836	3.64758	4.61556	3.69647	3.8151	3.52523	3.98497	4.07914	4.52446
7893278	6.83833	6.45086	5.92741	5.88444	6.2922	5.63566	6.73605	6.25124	4.4708	6.78029	6.45495	5.13006	5.79712	6.36382	6.7897	6.44622
7893279	3.97121	3.15699	3.2506	3.11427	3.21976	3.37397	4.26019	4.13684	3.56048	3.50593	2.94862	3.79911	3.30052	4.06	4.2148	3.65756
7893280	3.79946	3.61708	3.88088	3.53716	3.55455	4.64436	4.32183	2.9708	4.11353	3.90798	2.56853	5.051	3.47153	3.36915	3.49367	3.99569
7893281	11.2086	9.6678	9.99772	10.8021	11.3521	10.9176	11.0426	11.0859	9.79865	11.0223	10.4727	10.6891	9.83186	11.0272	11.0474	10.3201
7893282	5.69046	4.3497	5.52911	5.20348	5.39312	4.78092	4.72134	5.01621	7.05133	5.35021	4.36765	6.47657	5.8098	4.30539	5.3059	5.6425
7893283	8.89261	8.95645	9.07189	9.23823	9.56871	9.03501	8.41284	8.81627	9.21984	8.70143	9.28949	8.81304	8.68322	8.93576	8.43948	9.06544
7893284	4.95845	4.88935	5.13929	4.43052	7.08294	5.14664	5.64098	5.38384	5.07417	6.6367	3.31841	5.41722	6.17279	5.26255	4.49942	5.2184
7893285	5.54351	5.6758	6.08188	6.08142	6.30765	6.15912	5.94716	5.86606	7.58593	5.93821	5.76888	6.19141	6.11105	6.10507	5.53171	5.94892
7893286	4.65892	4.5913	4.67867	4.30583	4.32048	4.09895	4.6013	5.00334	3.36241	3.95423	3.59216	4.17842	4.25592	5.06906	5.2924	4.91359
7893287	4.37385	3.54372	4.12267	3.26292	4.3889	4.39115	4.27425	4.17353	3.72668	4.08135	3.44379	4.10658	3.84052	4.34328	4.78433	5.75995
7893288	7.8441	6.57456	6.83191	7.2159	8.03762	7.83043	7.49386	7.23299	6.64243	7.54228	8.23772	7.83338	6.81052	7.53041	7.33512	7.37029
7893289	11.0249	9.20481	9.59572	10.6704	11.222	10.7604	10.7091	10.899	9.97243	10.7523	10.2599	10.544	9.12252	10.6318	10.5408	9.99633
7893290	6.05695	5.52455	5.18652	5.14224	5.56324	5.69319	6.16115	5.91506	6.30628	5.50644	6.16958	5.16698	5.51978	5.68395	5.96922	5.83203
7893291	3.9642	5.2526	4.20293	4.21082	4.14491	4.56066	4.71279	4.93284	3.91472	4.40107	4.50297	4.65569	4.0189	4.25186	3.92589	4.77901
7893292	4.01173	3.09669	3.22063	2.68167	3.25411	3.52653	3.72999	3.3726	4.04464	3.94783	3.06371	3.396	3.2354	3.27727	3.78801	3.33028
7893293	2.59436	2.78719	2.75476	2.64726	2.7234	2.65173	2.84131	2.88279	2.59562	2.92244	2.66639	2.5839	2.73571	2.65387	2.72177	2.62789
7893294	7.5373	7.3459	7.69458	7.58683	7.76895	7.2266	7.4252	7.42904	8.21683	7.68654	7.05772	7.20549	7.37391	7.35364	7.4535	7.59481
7893295	3.79037	3.2954	3.2921	3.47556	3.32809	3.14697	3.48833	3.31896	3.16725	2.92333	2.99512	3.22637	2.8958	3.15107	3.34639	3.51292
7893296	6.47939	3.00831	3.91655	4.69459	6.83729	5.47206	7.59667	6.1197	4.15993	6.59468	4.40198	6.53381	3.919	5.54109	6.24726	4.95502
7893297	8.60384	8.51383	9.14843	7.96971	7.98639	9.04308	8.63678	8.63413	9.12579	9.18273	9.00679	9.70641	9.47393	9.02628	8.82339	9.58906
7893298	8.55005	9.6188	9.8328	9.44509	9.71231	8.98989	10.6791	8.78044	8.45892	10.4273	9.82493	10.2734	10.4916	10.4471	9.00833	9.52322
7893299	5.97091	4.97765	5.18517	5.10176	5.20679	5.28306	5.95623	4.86996	4.20987	5.4857	4.90941	4.76624	5.25678	4.76612	5.33262	4.49237
7893300	4.3144	4.12154	3.76061	4.04001	4.39522	3.84638	4.93918	3.90471	3.1019	5.16144	3.67624	4.0427	4.0132	4.29556	4.52249	4.06628
7893301	2.62719	2.68298	2.7751	2.79858	2.90908	2.77477	2.9178	3.03546	4.74638	3.23157	3.32848	3.11416	2.83391	2.90656	2.83419	2.78015
7893302	6.76706	6.20615	5.85592	5.92756	6.93186	6.12342	6.11867	6.63479	6.57663	6.12517	5.87168	6.22528	6.43518	6.66486	6.17868	6.8501
7893303	3.64316	3.51491	3.33514	3.34911	3.69113	3.50357	3.79301	3.27837	2.70758	3.48106	2.98399	2.88279	2.93828	3.40896	3.68594	3.37748
7893304	7.1439	7.53848	7.11756	7.0265	7.79477	7.10566	7.34537	7.58193	6.30854	7.16647	5.1772	6.85201	7.05638	6.84996	6.74855	7.38938
7893305	6.4336	6.81292	5.87024	5.11746	5.09027	5.63122	6.02754	5.87577	5.34872	6.30588	4.72445	6.09805	6.21445	6.07265	5.97035	6.67917
7893306	4.32363	3.95221	4.2032	4.2976	3.92192	4.14133	4.77395	4.90525	4.14176	4.97286	4.34236	4.16565	5.03884	4.78295	4.33675	4.07279
7893307	7.04964	6.97717	6.27034	5.83239	7.04059	5.39977	6.32109	6.74503	4.82507	5.98753	5.02902	5.66366	5.84937	6.41834	5.25923	5.85117
7893308	5.62653	5.88584	5.53815	5.86195	6.68763	5.70398	7.03519	5.80983	5.97381	6.68289	4.08742	5.50809	5.80819	5.70301	6.84696	6.77602
7893309	6.15251	6.66659	6.00876	6.3392	6.04986	6.02117	6.5211	6.06509	5.84399	6.01087	5.31399	6.53466	6.49871	6.09728	5.28522	6.28181
7893310	4.47613	4.63421	4.44239	4.28408	4.55632	4.02199	5.55742	5.39521	3.1633	5.61889	4.84187	4.55282	4.50848	4.81273	4.50855	5.13231
7893311	9.95419	9.69371	9.16879	9.82273	10.1484	9.85118	9.12584	9.73223	8.72343	9.94582	8.34512	9.89599	9.01458	9.43108	9.64172	10.2765
7893312	2.68488	2.45032	2.48148	2.67854	2.694	2.62721	2.81727	2.72597	4.10349	2.77914	2.50643	2.66509	2.57117	2.50556	2.54527	2.70559
7893313	8.58939	8.3171	9.0575	8.48122	8.52056	9.22427	8.76007	8.80445	9.14232	8.32327	8.27199	9.38272	9.43263	8.61782	8.61809	8.99948
7893314	7.5221	7.46185	7.22817	7.52192	6.99185	7.63285	7.90999	7.65712	6.80559	7.00474	5.25169	8.22778	7.20902	7.44963	7.59963	7.98871
7893315	7.16407	6.99866	6.32293	6.25913	7.05851	6.56906	7.50459	7.11173	4.05802	7.95684	5.41504	6.74624	6.2648	6.6937	7.40339	7.03121
7893316	11.5346	11.1511	11.2904	11.3636	11.5191	11.4853	11.4493	11.5568	11.3245	11.4644	11.5548	11.4713	11.4587	11.5937	11.6455	11.4236
7893317	2.88118	2.80023	2.91518	2.88531	2.98453	2.69767	3.00621	2.85058	2.79675	2.69985	2.6212	2.89315	2.92346	2.61672	2.89869	3.05727
7893318	5.25636	4.36893	4.69839	4.71466	4.53003	5.37464	5.22393	5.02224	5.83864	5.7729	4.62166	3.91792	4.76764	4.86549	5.53455	3.73547
7893319	7.5221	7.46185	7.22817	7.52192	6.99185	7.63285	7.90999	7.65712	6.80559	7.00474	5.25169	8.22778	7.20902	7.44963	7.59963	7.98871
7893320	7.8453	7.6345	7.85906	7.66645	9.175	8.13854	7.996	8.46955	7.00031	8.56338	4.63675	8.35266	8.37713	7.82014	7.87389	8.32128
7893321	11.2293	9.59172	10.1476	10.8511	11.4171	11.2105	11.282	11.1469	10.306	11.1034	10.7439	10.8567	9.91803	11.2172	11.2141	10.3431
7893322	5.43054	4.48984	5.49398	4.94039	6.32347	5.45051	5.45229	4.70868	5.19413	5.509	5.59528	5.62379	3.88738	5.68033	5.83494	5.05579
7893323	2.96446	2.95478	3.06979	3.01387	3.05601	2.86878	3.27072	2.99404	3.28523	2.93437	2.91559	2.99662	3.03475	3.2909	3.1915	3.25182
7893324	5.93886	5.03327	6.17163	5.85008	5.91253	6.06872	5.53462	5.83982	7.0313	6.37227	5.5933	6.51909	6.06174	6.12278	6.32697	6.79717
7893325	6.99629	6.71404	6.07133	6.99312	5.89301	6.47549	7.00233	7.13331	5.1343	6.44112	5.3202	5.45114	6.63974	6.85806	6.83604	6.36818
7893326	3.22508	3.3846	4.20727	3.56073	3.85884	3.28045	3.90777	3.13218	4.66686	4.42797	3.30962	3.82664	4.69091	3.40638	3.74511	3.64984
7893327	3.11212	3.0541	3.01166	2.97233	3.06403	2.97307	3.41139	3.32463	3.53261	3.54652	2.90392	3.21178	2.95467	3.3758	3.05092	3.04197
7893328	2.68357	3.21685	3.04283	3.05314	3.18053	2.73352	3.05901	3.12079	7.71191	3.51982	3.08522	3.45723	3.03739	3.12422	3.05618	2.99129
7893329	5.38842	5.70522	5.75771	6.05612	6.02312	6.15826	5.59241	5.82314	5.8598	5.86906	5.82888	6.17221	5.80303	5.88173	5.81106	5.72746
7893330	3.80227	3.88415	3.64439	3.4386	3.72228	3.47673	3.42615	3.60152	5.23712	3.66172	3.29919	3.57057	3.66867	3.57853	3.62592	3.62569
7893331	3.3569	3.51452	3.65548	3.34136	3.91086	3.67484	3.8726	3.65438	7.47945	4.19735	3.95046	3.54979	3.68089	3.93586	3.92602	3.72355
7893332	7.26783	7.0941	6.54737	6.74982	6.90849	6.85513	7.15859	7.18533	6.16414	6.83017	7.0069	6.8553	7.01781	7.0717	7.42647	6.9543
7893333	7.69049	7.81592	8.62688	8.52508	7.7436	8.55364	7.70775	7.03394	7.97778	7.56036	5.23018	8.70305	8.52344	8.41505	8.44302	8.01482
7893334	8.71871	5.60785	6.71491	8.39153	9.33765	8.75342	8.4008	8.4202	7.78866	8.31967	7.5402	8.52191	6.58119	8.62664	8.31307	7.43953
7893335	8.15136	7.96348	7.61014	7.95869	8.42028	8.07724	7.86913	8.33666	6.6653	8.51302	6.92149	7.61378	7.69746	7.80792	8.09313	8.53694
7893336	10.081	8.49041	8.79036	9.81538	10.5096	9.79535	9.82854	9.89822	9.33464	9.48969	8.88815	9.41192	8.18115	9.54666	9.81123	9.31653
7893337	8.02755	6.301	6.68641	7.7765	8.54483	8.20834	8.00278	8.12484	7.43629	8.12497	7.9414	7.94124	6.68977	8.13867	7.86363	7.18959
7893338	8.1444	7.03319	7.18006	8.05682	8.68922	8.16915	7.67143	7.76967	7.34604	8.00538	7.15376	8.0731	6.58774	8.09167	7.74919	7.51327
7893339	8.662	9.85037	9.13636	9.05938	9.08269	8.56482	9.13734	8.75978	8.4375	8.51066	8.2254	8.61246	8.96156	9.02489	8.72868	8.18096
7893340	9.28196	9.19311	8.98952	8.79581	8.5432	8.52652	9.2348	9.38806	7.85768	9.77546	9.33002	9.10693	9.81003	9.68697	9.25892	9.13425
7893341	7.50984	6.30868	6.52738	7.66506	7.71467	7.43074	7.0167	7.26818	7.35319	7.17485	7.44031	7.20131	6.54617	7.49366	7.08074	6.94116
7893342	4.75095	4.60868	4.99269	4.41688	4.59536	4.74888	4.97426	4.83241	5.57363	4.41965	3.76636	5.34128	4.967	5.17963	4.93331	5.6032
7893343	9.53511	9.26074	8.51028	8.81397	9.39195	9.061	9.77599	9.88423	8.30582	9.85308	8.11821	8.48591	8.61244	8.77841	9.03594	9.42594
7893344	8.99813	9.37493	8.81734	8.82316	8.72505	8.65534	9.24274	9.29981	8.3447	8.94256	9.04111	8.80523	9.254	9.17747	8.76287	8.74964
7893345	12.0377	12.2493	12.1852	12.2622	12.0998	12.0755	11.9483	12.0343	12.0466	12.2746	11.9023	12.2924	12.2456	11.9723	12.1697	12.2984
7893346	8.76019	9.47227	9.51542	9.21389	8.64762	8.5655	9.47565	9.07511	9.08775	9.4985	8.07567	9.07726	9.73625	9.19358	8.8715	9.35845
7893347	2.59429	2.5552	2.64525	2.56751	2.59614	2.68396	2.83946	2.79324	2.64689	2.61004	2.66982	2.77914	2.65927	2.71866	2.80192	2.72403
7893348	6.35376	6.16239	6.43007	6.73064	6.31962	6.76851	6.21384	6.64845	6.69545	6.43007	7.51398	6.75567	6.5386	6.63424	6.16524	6.7894
7893349	7.27216	7.50548	8.32236	7.86228	7.13931	7.44009	7.3825	6.79666	8.21087	7.45221	7.52146	8.29247	7.36931	7.00686	7.44473	7.15331
7893350	6.68366	6.35492	6.44064	6.13944	6.63862	6.65977	6.72233	6.54574	6.06705	6.92238	5.82769	6.44827	6.19597	6.30031	6.47244	6.88386
7893351	9.49051	7.86872	8.28662	9.2908	9.94274	9.37279	9.24145	9.32099	8.30839	9.41919	9.30497	9.11756	8.1603	9.42824	9.22452	8.35562
7893352	3.98788	3.16571	3.45123	3.76186	3.86305	3.66279	3.93088	3.90381	3.93671	3.83879	3.50882	3.57624	3.50079	3.47351	3.69217	3.80944
7893353	6.83048	6.37127	6.53309	7.13299	7.79063	7.02403	6.18536	6.46892	10.6654	7.01692	6.75944	6.84749	6.25189	7.10889	6.99015	6.80323
7893354	10.9929	10.7552	10.6214	10.8348	11.2908	10.8903	11.1338	10.8466	10.2953	10.9315	10.8751	10.9405	10.8816	11.1155	11.0063	11.074
7893355	4.24843	4.35236	4.28676	4.07238	4.35629	4.29717	4.03282	3.85774	5.54849	5.03562	4.95548	4.86468	5.01042	4.80288	3.22363	5.23181
7893356	8.40723	8.04457	7.71298	7.98829	7.94578	7.7778	8.16904	8.66814	7.88319	7.93954	7.81016	7.64157	7.9531	8.14112	8.55043	7.85858
7893357	10.6357	10.6066	10.5251	10.7434	11.1384	10.7747	11.0544	10.5453	9.84704	10.7158	10.9753	10.9789	10.7804	10.8496	10.6625	10.5472
7893358	5.36776	4.05106	4.2733	4.19703	4.91497	3.85078	4.34346	4.33143	7.98496	5.97909	4.59523	4.17886	3.7424	4.13768	4.87454	5.44656
7893359	6.8622	7.66951	7.48644	6.86859	6.76428	6.71054	7.52858	6.51854	6.4624	7.2348	6.67216	7.12317	7.6341	7.59147	6.32102	6.37651
7893360	5.21748	5.57847	5.26887	4.82429	6.24855	5.99385	6.48632	6.11964	9.22397	5.51501	3.7903	6.12833	4.82045	5.71073	5.94061	5.79317
7893361	6.90816	6.7694	6.27802	6.56113	6.79681	6.69553	6.41254	6.67344	6.33844	6.95902	8.15556	6.89665	6.48253	6.93074	6.79498	6.68329
7893362	9.83467	9.55664	9.41963	9.41189	9.20911	9.63561	9.15341	9.65036	9.08056	9.64924	10.0872	9.59084	10.3245	10.0551	9.96868	9.49108
7893363	10.8189	10.9053	10.1215	10.4548	10.8664	10.6703	10.2042	10.5517	8.80623	10.493	10.3674	10.0041	9.8276	10.1695	10.8215	10.823
7893364	10.6421	11.3672	11.2082	10.9878	11.0352	10.812	11.1389	10.9043	11.1844	11.4806	11.0531	11.0749	11.1418	11.1503	11.3261	10.9036
7893365	4.80213	3.12138	3.77245	3.72712	4.78122	4.23036	6.03024	5.7842	4.66484	6.16316	3.97549	5.03211	5.07122	5.09696	4.64659	4.79655
7893366	6.3816	7.07766	5.86532	5.63148	6.1907	6.48626	6.59595	6.44624	5.26659	6.50008	5.38102	6.18594	6.81325	6.0824	6.07687	6.37434
7893367	8.52002	6.83881	8.1401	8.70402	9.20859	8.37496	8.46947	7.74654	8.23131	9.22623	7.33518	8.84177	8.66924	8.66046	8.68904	8.79521
7893368	2.62613	2.61124	2.60427	2.56929	2.6022	2.63352	2.63133	2.65862	2.78545	2.62075	2.62185	2.60676	2.62572	2.57718	2.62583	2.62839
7893369	8.04934	7.88548	8.16835	7.5421	7.40158	7.7646	8.62178	7.67511	6.60278	8.0304	7.08705	7.80823	7.97752	7.87233	8.20351	8.09035
7893370	5.60985	5.26045	5.42246	5.3993	5.44266	5.13398	5.33967	4.91485	5.6455	5.53145	4.89993	5.05628	5.02651	4.9026	5.51376	5.42094
7893371	11.6691	11.2481	11.4781	11.4497	11.3699	11.3714	11.3399	11.4363	10.9648	11.1107	11.2204	11.2189	11.4527	11.3146	10.853	11.3507
7893372	3.22029	2.73859	2.8338	2.8873	3.22145	3.08759	3.39807	3.61649	3.38237	2.93144	3.23047	3.87545	2.77252	3.25648	2.8738	3.03588
7893373	6.32053	5.9467	5.91052	6.13661	6.72061	5.54135	5.84292	6.40572	4.34681	6.30044	5.28509	5.80956	5.9014	6.45444	6.0234	5.73925
7893374	10.927	10.4135	10.7843	10.1599	10.3408	10.7714	10.7717	10.7307	10.7056	10.9993	10.6595	10.4253	10.9003	11.0841	10.9432	10.2828
7893375	3.20198	3.03975	3.13564	3.03229	3.43668	3.30542	3.17062	3.08097	4.07284	3.52276	2.64271	3.00588	3.08348	2.78655	3.18979	3.26878
7893376	5.16575	4.09025	4.9241	3.77083	5.38306	4.38092	4.33932	4.50661	5.39071	4.79616	3.27635	5.62379	5.20994	3.7946	3.49888	5.23728
7893377	2.70634	2.79745	2.71026	2.74235	3.14268	2.90428	2.95245	2.95374	2.82069	2.89554	2.67557	3.11413	2.66527	2.6328	2.70445	2.90196
7893378	3.51161	3.00797	3.01741	3.05807	2.90676	2.97726	2.84075	2.84936	3.26114	2.98519	2.61172	3.44049	2.99071	2.82439	3.26056	3.57454
7893379	2.72131	2.75978	2.7911	2.80527	2.80611	3.03665	2.93464	2.88541	2.80228	2.80694	2.71589	3.71685	2.64078	2.96118	2.75723	2.91435
7893380	5.38393	3.64084	5.13767	3.98692	4.78266	4.68406	5.00878	5.42575	6.92756	5.17357	5.04598	5.32069	5.70243	5.38337	5.37154	4.84638
7893381	4.14892	3.47676	3.32954	3.15663	3.28774	3.27057	3.56342	4.05446	4.13315	3.17798	3.37646	3.13758	3.13296	3.49119	3.45518	3.68789
7893382	10.9885	11.0609	11.0877	10.8139	11.2598	10.9742	11.1504	11.0487	10.3899	11.5555	11.6958	11.4009	11.5162	11.2979	11.1833	11.2925
7893383	6.64294	6.02223	6.13871	6.42858	7.01185	6.69657	6.49796	6.07943	5.00618	6.31428	6.04766	6.27929	5.80552	6.43405	6.34402	5.94807
7893384	5.07524	5.41052	4.71018	4.95788	4.57841	6.3067	5.50576	6.09174	6.28182	5.56701	7.16966	5.69048	5.35249	5.54225	5.21023	6.27788
7893385	11.1669	11.19	10.8628	10.9307	11.3927	10.9101	11.4606	11.2077	10.7044	11.3415	11.2947	11.3666	11.3404	11.5481	11.3255	11.0836
7893386	11.8798	12.0375	12.2897	11.9485	11.8856	11.8545	11.8992	11.905	11.5539	12.2577	11.9614	12.2154	12.3661	12.074	11.9518	12.1968
7893387	6.11426	4.97515	5.91707	5.14294	5.85222	5.35888	4.73152	5.32935	4.29831	6.4611	3.3501	5.94777	5.37998	5.70959	5.85856	6.79259
7893388	2.96816	3.021	3.28351	2.87357	3.25331	3.0047	3.54558	3.37261	3.02051	4.13672	2.99535	3.20739	3.13462	3.20695	2.9883	3.16332
7893389	2.82128	2.55622	2.62326	2.65572	2.60683	2.64081	2.55156	2.75537	2.71303	2.71182	2.62607	2.75815	2.58497	2.63034	2.65378	2.69163
7893390	10.0163	9.46992	10.0006	9.95757	9.44897	9.29817	9.35922	9.61644	9.17793	9.18627	8.80521	9.45398	10.1396	9.43778	8.59699	9.57767
7893391	8.85405	7.25237	7.42924	8.19795	9.09607	8.59106	8.78573	8.71741	7.48121	8.40801	8.27652	8.57047	7.12787	8.45529	8.5799	8.25881
7893392	4.7143	5.71534	5.29139	4.98634	5.46128	4.10112	5.1241	4.61524	4.47272	5.19875	4.17178	5.02551	4.88753	5.54313	5.14909	5.56917
7893393	9.62994	8.61135	10.058	10.2809	10.0936	9.84005	9.65829	9.72998	10.7788	10.0215	10.8968	10.3453	10.2958	10.3328	10.245	9.90042
7893394	10.5891	10.2942	10.8857	10.6419	10.7668	10.7789	10.8388	10.5191	10.005	11.0425	10.7436	11.0175	10.8089	10.7863	10.0703	10.9833
7893395	6.02657	6.24864	6.96548	7.11479	7.11472	6.68764	5.91338	6.14208	6.90681	6.71044	7.10168	6.58564	6.53264	6.4194	6.37533	6.55325
7893396	5.48846	6.48161	6.65661	5.97649	5.39216	6.32703	5.46197	5.35389	5.57717	5.5482	5.57797	6.75866	6.13224	5.34129	5.44807	7.03532
7893397	3.4128	3.34182	3.4508	3.03318	3.02955	3.03404	3.45795	3.43074	5.27731	4.19565	2.89524	3.45516	3.91951	3.62063	3.36318	3.64554
7893398	3.08175	2.89207	2.9551	2.86988	2.91288	3.09277	3.12261	3.5422	3.14731	2.89352	3.39148	3.07025	3.01199	3.39241	2.94924	2.97778
7893399	8.97315	9.23243	9.27413	9.32098	9.83475	9.12787	9.76118	8.95131	8.69432	9.51038	9.59543	9.38279	9.81017	9.59004	9.31027	9.17648
7893400	2.93331	2.91304	2.91396	2.87495	2.7463	3.25897	3.20428	3.14566	2.94008	3.38412	2.75333	2.89132	3.2043	2.82046	3.12238	3.25965
7893401	3.83828	3.07058	3.79958	3.02155	3.18377	3.37992	3.72179	3.57078	3.02836	3.7529	2.86765	3.47111	3.20442	3.29245	3.65857	3.4995
7893402	9.04795	7.46807	7.8454	8.77195	9.41805	8.64985	8.41966	8.89342	7.72348	8.82385	8.54515	8.57583	7.5656	8.81137	8.74117	7.9899
7893403	8.74121	7.65885	8.03843	8.10807	7.75496	7.78448	8.20744	8.50621	6.57726	8.35045	7.54712	8.50175	8.21102	7.30775	8.27922	8.43262
7893404	5.17295	4.64428	5.08249	4.4184	4.6333	5.35396	5.63313	4.95152	7.02461	5.45677	5.3451	5.41329	4.75357	4.62833	4.62406	5.59998
7893405	6.43737	6.11751	6.06609	5.46709	6.13266	6.12845	6.68426	5.8028	4.35358	6.8073	6.4215	5.71606	6.09761	6.43407	6.58041	5.95465
7893406	3.9848	2.85533	2.70954	2.6365	2.85091	2.63942	2.7833	2.59281	2.87236	2.8538	2.49038	2.48473	2.54413	2.88581	3.11294	2.90428
7893407	10.3548	9.82252	9.98624	10.0805	10.2118	10.0954	9.89225	10.0778	9.22734	10.1598	9.77147	9.85075	9.8972	10.1434	10.1223	10.1813
7893408	4.09567	3.95887	4.11922	4.13147	4.07874	4.6441	4.29452	4.0355	4.43201	4.11859	3.52981	3.89465	3.76256	4.08917	4.24695	3.65215
7893409	4.00347	4.01569	4.10176	4.17799	4.02595	4.18521	3.91981	4.03713	4.38602	3.9935	4.6069	4.12169	4.13531	4.13371	3.88714	4.13997
7893410	7.26183	7.27105	6.68289	6.78591	7.24294	7.62539	7.01068	7.36057	6.41891	7.25716	8.83958	6.83046	7.17124	7.15594	7.12238	7.1713
7893411	5.27812	5.50516	5.2057	5.17277	5.66305	4.69877	5.44544	5.44283	5.90011	5.78691	5.0554	5.03289	5.11049	5.34588	5.60383	5.40369
7893412	4.6364	3.25678	3.72204	3.92097	4.94431	4.03587	4.20652	4.11159	3.3333	4.31571	3.30947	4.14818	3.50664	3.8709	4.22825	4.10002
7893413	6.90618	7.35204	7.28607	7.43906	6.97236	7.03044	7.04026	6.81264	7.43088	7.42933	7.30936	7.06406	7.36006	7.21607	6.99357	7.34854
7893414	11.1491	9.58445	10.0069	10.9345	11.6374	11.3269	11.0372	11.1634	10.4293	11.1013	10.736	10.9634	9.73074	10.9826	11.0507	10.5034
7893415	5.84138	5.15899	5.67162	5.13086	5.85728	5.25346	6.89261	5.70642	4.1723	5.45601	5.0444	5.76732	5.162	5.18438	5.24505	5.98128
7893416	6.13256	4.53151	4.82858	5.0926	4.91833	5.21599	5.32731	5.16605	5.39311	5.22862	4.16843	4.54066	5.45586	5.50975	4.6742	4.378
7893417	3.19358	3.13786	3.67969	3.10684	3.31231	3.66836	3.40669	3.07775	4.23114	4.47304	5.02106	4.32365	4.11015	3.94451	3.99053	4.11962
7893418	8.52863	6.35827	6.94791	8.28222	8.74394	8.479	8.05259	8.2683	7.63358	8.05963	7.8964	7.88485	6.56656	8.32438	8.02469	7.45486
7893419	11.5346	11.1564	12.0277	11.7942	11.2804	11.6904	11.4034	11.7784	11.7154	11.561	11.2351	11.9012	12.1043	11.6091	11.6268	11.6029
7893420	7.43306	7.98032	8.38907	7.74137	8.43551	6.96029	8.42303	8.23446	7.05382	8.77678	7.53539	8.56284	8.75653	8.21002	8.26822	7.68321
7893421	7.18388	6.21709	5.41732	5.77711	7.15404	7.08862	7.80752	8.27846	5.89432	7.27606	5.48851	6.06366	5.82566	6.17524	7.4449	6.7165
7893422	10.3414	11.2258	11.3789	11.0544	10.9111	11.0967	11.0237	10.5858	10.0345	11.0161	10.5696	11.3387	10.9048	10.937	10.2753	10.8796
7893423	3.2614	3.28081	3.12514	3.02134	3.22657	2.96393	3.42154	3.29396	3.02721	3.14301	2.93627	3.10327	3.04736	3.45982	3.35352	3.11179
7893424	9.84321	9.98079	10.7457	10.6012	10.293	10.2473	10.4969	10.2845	10.2357	10.1245	10.2799	10.4766	10.4645	10.4724	10.3465	9.67779
7893425	2.72131	2.75978	2.7911	2.80527	2.80611	3.03665	2.93464	2.88541	2.80228	2.80694	2.71589	3.71685	2.64078	2.96118	2.75723	2.91435
7893426	2.85884	2.84934	2.83267	2.81852	2.80318	2.86795	2.84488	2.88877	3.06846	2.8586	2.94955	2.85262	2.89924	2.84094	2.86991	2.87636
7893427	3.60574	3.93398	3.96546	3.85909	3.80986	3.49157	3.49896	3.79882	3.58724	3.20961	3.7492	3.7722	3.65307	3.69176	3.84176	3.60895
7893428	9.21804	7.89672	8.07314	8.54002	9.20478	9.00099	7.96484	8.9123	8.5924	8.84372	8.90136	8.76161	7.72563	8.72566	8.76427	8.72034
7893429	4.28296	3.55994	4.14109	4.09967	3.94104	3.68121	4.19566	3.62279	4.10708	4.26798	3.63885	3.49212	4.02225	3.805	4.415	3.56873
7893430	3.17138	3.00427	2.77835	2.85312	2.87744	2.98939	3.42255	3.65044	2.90118	3.34471	3.34475	2.85114	3.02183	3.21831	3.44318	3.41105
7893431	3.35989	3.88391	3.16169	3.22048	3.45506	3.55334	3.0736	3.14541	2.83502	3.57527	3.27061	3.15184	3.08416	3.05895	3.19035	3.16732
7893432	5.75889	5.54648	6.27261	6.16592	6.58028	5.96049	6.63886	6.53748	5.462	7.82751	5.22682	6.16942	6.47879	6.23223	6.07472	6.5479
7893433	3.91775	3.56212	4.06924	3.81767	4.14747	4.16522	4.35668	4.7501	3.80399	4.7014	3.86913	4.36949	3.82123	4.35612	4.17622	4.2633
7893434	3.13194	2.73318	2.72466	2.71837	2.73141	2.95114	2.90557	2.76571	3.31534	2.8652	2.84044	2.86403	2.8992	2.9784	2.86226	2.92398
7893435	8.30766	6.95396	7.34258	8.19957	8.92915	8.36234	8.08823	8.41434	7.10565	8.2499	8.30979	8.24815	7.03315	8.27617	8.32734	7.70253
7893436	6.10064	5.86857	5.52069	5.31569	5.54388	5.86132	7.09068	7.08668	4.19805	6.14954	4.78003	5.86139	5.46913	6.01295	6.53779	5.97498
7893437	3.95209	3.16283	3.57613	3.43558	3.38663	3.5004	3.38973	3.17365	3.41572	3.59707	3.03944	3.0741	3.19858	2.96844	3.83488	3.21738
7893438	7.75429	6.82512	6.83595	7.41169	7.71942	7.65573	7.37579	7.65378	6.85103	7.76041	7.4347	7.39447	7.31454	7.63132	7.44371	7.72805
7893439	9.72838	8.59906	8.20473	8.6495	8.70243	8.51787	9.01491	9.30773	7.40588	9.13019	9.27352	8.21003	8.74537	9.0768	9.19223	8.41564
7893440	3.03692	2.70363	2.6438	2.92295	3.1767	2.73182	2.9476	2.72252	2.65652	2.95425	2.81773	2.91058	2.57624	3.15304	2.60619	2.76566
7893441	7.65876	7.52559	8.61106	7.37669	7.01954	8.04126	6.28156	7.17794	7.41539	7.83602	7.07115	8.33386	9.10091	7.56502	7.75013	8.02182
7893442	8.70074	9.07573	8.69709	8.51434	9.71965	8.78021	8.55775	9.10214	7.81414	9.0615	7.55617	8.8468	9.05973	8.23078	8.2413	9.02851
7893443	6.24159	5.84838	5.75899	5.77957	6.01643	5.37777	6.10743	6.24871	5.05514	5.70527	5.89785	5.55278	5.68147	5.66046	5.47244	6.05213
7893444	7.67557	8.05644	7.56279	7.60624	8.28075	6.97164	7.72192	8.15362	5.89002	7.77788	3.96097	7.2721	7.29849	7.2119	7.13564	7.96431
7893445	3.52171	3.40039	3.47191	3.72755	5.0324	3.72714	4.59358	4.91559	5.30543	5.96686	3.77919	4.31215	3.07008	4.60983	3.97717	3.28903
7893446	4.2894	4.0965	4.10027	4.34683	4.44571	4.1982	4.48209	4.22121	3.76456	4.49924	4.17738	4.35411	4.04464	4.38069	4.37909	3.83923
7893447	8.10282	8.29772	7.60166	7.67439	7.61837	8.33981	7.50066	8.49257	7.91965	8.09882	8.81568	7.9927	7.58908	7.7911	7.77064	8.15451
7893448	9.57058	9.66397	9.47135	9.81391	10.0236	9.42829	9.07313	9.42731	9.47652	9.3883	9.51356	9.42335	9.14634	9.33401	9.2126	9.81077
7893449	8.39433	8.3074	8.07444	8.11808	8.25094	8.26592	8.12767	8.4722	7.44805	8.64943	8.06017	8.18764	7.97834	8.40943	8.29179	8.70584
7893450	3.28802	3.5477	3.61108	3.8855	4.04212	3.84641	4.67018	3.65838	4.02343	3.76659	4.10895	3.77385	4.26155	3.86136	3.90399	3.78797
7893451	3.12533	3.09892	2.94221	2.99438	3.03203	2.98766	2.93952	3.38733	3.3545	3.17661	3.38902	2.97017	3.1086	3.30008	3.15528	3.02361
7893452	5.61454	5.24342	4.81347	4.11971	5.98633	5.3112	6.0087	6.24255	5.18375	6.42411	3.44736	4.24018	5.91232	5.61325	5.05091	6.58728
7893453	8.87323	8.54978	8.80325	8.95191	8.49245	8.40951	8.51135	8.41068	7.87164	8.71011	8.2754	8.83423	9.00502	8.78865	8.13828	8.82264
7893454	8.05935	8.18354	8.2134	8.57551	8.61999	8.24974	7.51257	7.98506	8.12673	7.94904	8.25889	7.92257	8.04328	8.1642	7.77669	8.16493
7893455	7.95554	8.33708	7.31123	7.03464	7.40575	7.203	7.89109	7.60205	6.60358	7.51568	7.73088	7.19776	7.78899	7.66985	7.64822	8.25099
7893456	4.72401	3.842	3.53837	3.14195	3.86015	3.2811	4.10564	4.19136	3.59638	4.21857	3.52202	4.16624	3.45657	3.65315	3.56445	3.53562
7893457	2.74262	2.77707	2.95939	2.8682	2.92814	2.58883	2.72932	2.91221	2.84538	2.96326	2.77653	3.12829	2.94611	2.75297	3.05606	2.74009
7893458	9.20404	8.9912	10.532	9.95029	9.08223	9.63201	9.48214	9.73025	10.1087	9.88949	8.72045	10.6721	10.6836	9.49549	9.67991	9.6617
7893459	5.34199	4.69087	4.53005	5.01661	5.43756	5.37273	4.87935	4.77914	4.25356	5.66921	4.56887	5.46947	4.40695	4.96904	5.9478	5.51013
7893460	10.8322	10.288	10.9907	10.7387	10.5987	10.9255	10.5362	10.8101	10.2854	10.9417	10.6498	11.0453	11.1619	10.9601	10.8903	10.8662
7893461	8.62954	8.38654	8.84403	8.30073	8.53836	8.47639	8.53392	8.27318	7.53955	8.97314	7.70884	9.16979	8.45413	7.90182	7.47624	8.95041
7893462	5.871	5.68922	5.65595	5.36137	6.11768	5.94132	6.31857	5.86327	4.78931	6.08082	3.60601	5.5956	4.6884	5.06629	5.85867	6.34113
7893463	5.85036	5.24864	4.81131	4.82362	5.2053	5.47738	5.5568	5.76101	5.23936	5.71998	6.29542	5.53921	5.32738	5.18981	5.59397	5.72606
7893464	6.03517	5.48065	5.77866	5.92712	6.38075	6.285	5.95544	6.21904	6.07734	5.9627	5.65965	5.79466	5.2972	6.02206	6.26801	5.75595
7893465	4.1919	3.76167	4.32891	4.58656	5.25136	4.7678	4.46431	3.9066	10.6051	5.777	3.89569	4.96156	5.0503	4.34891	4.62469	4.49127
7893466	10.5826	10.9918	11.2176	11.0449	10.7748	11.048	10.8195	10.6609	11.3997	11.1258	11.1864	11.1888	11.0363	10.9781	10.2601	10.8895
7893467	7.43504	7.36213	7.98294	7.53243	7.60329	7.67217	7.55804	8.24114	7.09524	8.34701	6.90465	7.64305	7.58398	7.52635	7.2615	7.71098
7893468	7.27006	6.14477	6.01959	6.07861	6.62557	6.70473	6.84928	6.75317	6.13638	6.41798	5.44214	6.75346	5.91148	5.94635	6.19075	6.92808
7893469	10.1401	10.0505	10.1242	10.2149	10.3768	9.83928	9.63781	9.84312	10.1376	9.57228	9.26008	9.64175	9.82858	9.92708	9.9965	9.82282
7893470	5.50271	3.92699	4.61708	4.72062	3.64287	4.3882	4.17368	4.30037	4.08448	5.0383	3.75335	4.38773	4.97358	5.11518	4.76355	4.56051
7893471	8.28559	8.89434	8.36816	8.05322	8.32583	8.53392	8.24032	9.0562	5.97007	8.61855	5.6347	8.23175	7.25841	8.32419	8.50024	8.71661
7893472	6.74731	6.92057	6.88828	6.7191	7.60969	6.7804	7.76109	7.77467	6.43131	7.62878	6.62895	8.01258	6.56001	6.44886	7.59984	7.88765
7893473	5.15383	4.76458	5.00908	5.53352	4.94649	5.24244	4.64667	5.34428	6.99081	5.02374	5.35861	5.95681	4.69235	4.31604	4.06214	5.21777
7893474	4.31987	5.19588	4.7921	4.20567	5.00334	4.6007	5.16384	4.85788	4.20037	5.24227	4.51745	4.93843	4.8303	4.62824	4.26804	4.5424
7893475	5.80788	5.53738	5.67577	5.4097	5.6102	5.03461	6.45733	5.0104	4.63012	6.98763	4.72324	4.91914	4.76881	5.54984	6.45443	5.24088
7893476	8.60866	8.51842	8.85343	8.27111	8.3727	8.42233	8.30632	8.56184	7.61146	8.55889	7.98544	8.20809	8.77186	8.81334	8.54219	8.15279
7893477	6.775	7.31084	7.88399	7.31805	7.03134	7.33081	7.53458	7.50002	7.5479	8.14702	8.14769	8.1991	8.69014	7.8657	8.09871	8.18174
7893478	6.86986	6.52031	6.32884	6.29402	6.54817	6.45039	6.63623	6.80969	6.71615	6.82575	5.42056	6.19147	6.75516	6.30507	6.67349	7.1435
7893479	3.01825	2.97473	3.13846	2.93143	3.10398	3.14176	3.18513	3.00229	3.2809	2.74866	2.78705	3.01489	3.15212	2.78229	2.9256	3.07276
7893480	6.83288	7.65935	6.33098	7.29243	8.2016	5.89731	7.46411	6.9062	6.40594	6.76593	7.26339	6.4136	6.78476	7.29473	7.11617	6.11987
7893481	6.68111	7.54706	6.9276	6.51704	6.97645	7.0669	6.4853	6.63606	6.0998	6.78453	8.07326	6.95107	6.68932	6.647	6.67995	6.90973
7893482	5.92209	3.95884	4.02991	5.21379	5.52516	5.53244	5.54184	5.22683	4.73399	5.48152	3.98194	5.7931	5.025	5.27183	4.66879	5.07074
7893483	7.3938	6.52604	6.78896	7.04521	6.86577	6.84524	6.87551	6.97429	6.27996	7.23934	6.76841	6.68262	7.18316	6.981	6.8227	7.06826
7893484	6.31217	3.3927	3.52309	4.07238	6.20167	4.09708	4.4536	4.10205	5.3748	4.05528	3.46643	4.32562	2.96142	4.48089	4.15809	3.21121
7893485	9.99514	10.4416	9.69404	9.93815	10.2076	9.78651	10.056	9.94246	8.70801	9.71111	9.68018	9.56607	10.4424	10.1618	9.30759	9.90491
7893486	10.5133	11.1699	10.6957	10.676	10.7996	10.6456	10.897	10.8182	10.5957	11.0587	10.9078	11.0405	10.5995	10.9129	10.7532	10.8105
7893487	5.86818	5.14595	5.23044	5.04348	4.91841	5.00353	6.03288	5.24032	4.72031	5.97097	3.30503	5.25156	5.92682	5.26773	5.975	5.30015
7893488	5.32285	4.81937	6.33604	5.92982	6.1895	5.93012	5.76537	4.99526	6.1503	6.27352	4.26587	6.76175	6.25883	5.51286	5.98797	5.65021
7893489	2.70651	2.67639	2.51172	2.54563	2.61039	2.52355	2.5471	2.73061	2.64053	2.66161	2.54471	2.61805	2.55104	2.57891	2.56113	2.66049
7893490	3.2339	3.19672	3.25984	3.10714	3.1004	3.18304	3.26249	3.07523	3.494	3.04637	3.89031	3.21254	3.40256	3.19912	3.4846	3.1289
7893491	9.98431	9.18846	9.30555	9.9272	10.5665	10.1225	9.70568	9.89972	8.78721	9.71292	9.98743	9.81916	8.73893	10.0372	9.73196	9.76417
7893492	2.9049	2.96814	3.7424	3.27654	4.15904	4.69574	5.33624	2.8852	4.51799	5.92353	3.59636	5.88642	3.89679	3.8043	3.3927	5.04512
7893493	6.88401	6.84243	6.50987	6.59874	7.38968	6.62827	6.98081	6.53916	4.99055	7.17911	6.22805	5.80013	6.87686	7.11517	7.06359	6.94587
7893494	9.27495	10.7646	10.2107	10.062	9.93945	9.36354	9.91219	9.94402	10.0693	10.4111	9.20568	10.1542	10.0713	9.90059	9.82717	9.42279
7893495	5.98923	4.15661	4.81992	4.78336	5.24243	5.44069	5.23016	5.22482	4.344	5.5639	4.29281	5.51782	4.25683	5.37192	5.65628	5.5154
7893496	4.88599	4.23626	4.64056	4.01847	4.41559	4.57233	4.55238	4.26821	3.57027	4.8888	3.80029	4.11107	5.18069	4.20747	4.0613	4.79273
7893497	9.47554	9.29739	9.58258	9.37288	9.14171	9.28002	9.11898	9.77162	8.25535	9.69688	8.27993	9.75067	9.32752	9.65224	9.31886	9.57043
7893498	10.7894	9.15722	9.80315	10.7944	11.3175	11.0996	10.8362	11.0757	10.024	10.7569	10.7697	10.5785	9.23174	10.9388	10.8102	10.0348
7893499	2.96652	2.80631	2.78161	2.96349	2.8152	2.98049	3.02962	2.75626	2.96371	2.92899	3.00285	2.75978	3.05095	3.14201	2.96186	2.95937
7893500	8.76341	8.65469	8.618	8.80782	8.47206	8.32744	8.56509	8.31368	7.97547	8.61735	7.37775	8.5562	8.40369	8.66468	8.74438	8.3185
7893501	4.91293	3.90044	4.77911	3.94745	4.33826	3.60675	5.74967	4.45005	3.79228	4.84711	4.26015	4.36584	4.12974	4.33194	4.304	4.81969
7893502	2.71742	2.65659	2.81857	2.76853	2.81289	2.68191	2.9384	3.12668	2.5283	2.53352	2.71023	2.80139	2.64011	2.7665	2.87811	3.08258
7893503	7.72762	6.75479	6.01103	7.04835	8.12827	7.26728	7.40384	7.56967	6.33118	7.48471	7.13772	6.89022	6.14043	7.38165	7.55229	6.35179
7893504	8.74553	8.65411	9.76739	9.3621	9.19545	9.08547	8.82308	8.73277	9.63511	9.75871	9.65199	9.4352	9.71149	9.65558	8.98619	9.20155
7893505	2.82097	3.08531	2.96193	2.96255	2.87329	3.13444	2.98416	3.10747	3.3497	3.05897	3.26977	3.07814	3.09988	3.06775	3.34829	3.22404
7893506	4.74226	5.26016	5.39758	4.71184	5.0222	5.22484	5.5618	5.52768	4.81158	5.98139	4.37161	4.83487	5.96726	5.42832	4.68022	5.11361
7893507	11.959	10.8223	11.3578	11.9336	12.2958	12.0307	11.8247	11.8905	11.1336	11.9194	11.8377	11.8068	10.7752	11.8877	11.814	11.5732
7893508	4.73797	3.55828	4.53379	3.94167	3.6566	4.59822	4.27178	4.00705	4.47957	4.75035	3.45442	4.42418	4.08385	4.48634	4.49633	3.69628
7893509	3.27601	2.88706	3.25678	2.92121	3.17023	3.50453	3.43004	3.09498	3.50623	3.33484	3.67863	3.30542	3.20084	3.37435	3.0777	3.34522
7893510	4.74797	4.15766	3.92268	4.40464	3.85069	4.35839	4.21205	4.10808	4.84623	3.86448	3.9327	4.17797	3.7908	4.08052	4.35813	4.17937
7893511	10.2266	7.69	8.63445	9.73282	10.6111	10.0204	9.80518	9.8431	8.56414	9.74624	9.25843	9.51153	8.4114	9.98121	10.0103	8.91956
7893512	4.14987	3.74712	3.24526	3.24784	3.28252	3.27227	4.32625	3.74643	3.68806	3.89535	3.2036	4.00817	3.04216	4.17969	4.74133	3.32942
7893513	6.3759	6.05376	6.10723	6.16384	6.43221	6.58284	6.11249	6.90522	5.89769	6.88007	8.3094	6.6179	6.28444	6.55996	6.3254	6.91618
7893514	6.5781	3.87832	5.03223	4.73909	4.18025	5.75452	5.74104	6.2549	3.95254	5.83762	3.63683	5.59695	5.27694	5.78181	4.79536	5.41046
7893515	8.27569	8.49391	8.53635	8.65184	9.16292	8.60621	8.00051	8.14974	8.75425	8.33308	8.41422	8.07442	8.17016	8.5725	8.40076	8.55204
7893516	11.3748	11.0138	11.1378	11.2364	11.4151	11.3094	11.356	11.6729	10.6886	11.6182	11.0826	11.2973	11.3828	11.494	11.4815	11.37
7893517	7.39289	6.89441	7.28897	7.17997	7.00931	6.85038	7.23832	7.15363	7.1124	7.76413	7.86304	7.22179	7.56918	7.59714	7.16464	7.58068
7893518	8.84595	8.37829	9.4262	9.28585	9.03241	9.02052	8.58788	8.40095	9.29157	8.59251	8.76995	9.39754	8.64143	8.71957	8.74039	8.74879
7893519	4.86427	4.35622	4.74801	4.32595	4.78219	4.37435	4.89286	3.9451	3.29303	5.51446	3.67204	4.60544	4.87276	3.72966	4.49361	4.83015
7893520	3.94006	3.54298	3.66717	3.64597	3.97625	3.73672	4.20994	3.80956	3.346	3.27439	4.09711	3.5124	4.28634	4.2515	4.25014	3.4295
7893521	3.70932	2.96761	3.70644	3.88218	4.3766	3.64884	4.14843	3.40124	4.06888	4.26842	2.6311	4.13614	3.27136	3.64615	3.98771	3.64785
7893522	4.56775	3.83523	3.09451	4.42792	5.10103	3.84574	4.9682	4.78916	3.96927	4.9525	3.17591	4.10348	3.87867	4.08824	4.40453	5.33457
7893523	6.99645	7.68294	7.26083	7.12243	7.39005	6.97426	7.55579	7.6084	6.74731	8.35258	5.77911	7.39357	7.29357	6.50519	6.7596	8.21948
7893524	9.67284	9.07834	9.42076	9.53571	6.41313	9.46709	9.51463	8.98579	8.49896	9.15518	9.09629	9.70932	8.80053	9.34495	9.09719	9.84779
7893525	5.75468	5.33729	5.98533	5.88611	6.551	6.5781	5.99659	5.61576	5.24766	6.50704	6.55909	6.48226	6.27432	6.59771	6.57786	6.50171
7893526	7.96012	6.65857	6.8829	6.66069	6.08606	7.10885	6.72045	6.30776	7.2635	5.51083	4.79583	7.15037	6.53138	6.88719	6.79635	7.42419
7893527	6.47814	5.63923	6.13523	5.93379	6.61224	5.41088	6.18275	6.16975	4.86906	6.15932	5.32905	5.94379	5.71979	5.93205	6.35648	5.82003
7893528	7.0102	7.50905	7.62901	7.03757	6.63402	7.75523	7.33775	6.7288	6.29929	7.64967	7.85943	7.46185	7.5949	7.34587	7.80208	7.2816
7893529	5.93965	3.79208	4.69295	5.30349	6.00102	5.26299	6.37093	6.37403	4.4054	5.95768	3.26171	5.43103	5.46436	5.72693	5.8007	4.4927
7893530	11.239	10.769	10.9504	10.873	10.9771	11.0072	10.8994	11.1783	10.1506	11.3158	10.7506	10.9002	10.9314	11.02	11.1569	11.0649
7893531	6.32979	5.36881	7.03702	6.81517	6.14068	5.65261	7.66365	7.08487	6.30199	7.20892	7.18072	7.15203	7.49616	7.23546	7.38346	6.36683
7893532	2.72549	2.55612	3.55137	2.72511	2.87695	2.98626	2.70916	3.04213	3.49654	2.43777	2.62702	3.29433	3.01613	2.85282	2.71601	2.77493
7893533	6.17309	4.95287	4.89645	5.44324	6.75607	6.17034	6.09365	5.89335	4.6859	5.7856	5.56757	5.98585	5.04623	5.87687	5.90054	5.24589
7893534	8.91947	10.1581	9.79448	9.43802	9.44111	9.10483	9.60799	9.33076	9.49024	10.0228	9.44966	9.54291	9.79428	9.56759	9.3351	8.9867
7893535	5.1777	5.455	4.92875	4.96474	5.07014	4.65791	4.75637	5.33885	5.83834	5.31998	5.0369	5.08928	4.69177	5.07537	4.65419	5.27587
7893536	10.4466	10.1642	10.2228	10.5003	10.5681	10.101	10.0398	9.96419	11.2951	9.68711	9.83892	9.89828	9.93003	9.92875	10.0845	10.2315
7893537	3.75113	3.37261	3.72068	3.85815	3.96666	3.46554	3.52349	3.82968	3.95164	3.4079	3.66421	3.25158	3.3616	4.2903	3.99918	3.66681
7893538	5.20275	5.9871	5.50224	5.46854	6.37111	5.81187	6.61333	5.80114	5.6245	6.75472	4.77559	6.22212	5.47406	5.68313	6.44926	5.8318
7893539	10.0113	9.48209	10.1468	10.2191	9.37714	9.82488	10.1805	10.2518	10.1039	10.0226	9.34598	9.86467	9.90042	10.0341	9.88487	9.3876
7893540	10.529	8.72533	9.14493	10.2852	10.7103	10.8327	10.4792	10.6704	9.37735	10.5331	10.1962	10.2868	8.66949	10.5685	10.2487	9.62145
7893541	3.83583	2.93145	2.87414	2.96095	3.14279	3.44043	3.08628	3.15924	3.92966	3.20018	2.98128	3.26702	3.17424	3.12161	2.93636	3.37802
7893542	7.76348	8.27239	7.93277	7.82791	7.89529	7.69521	7.71125	7.66344	6.12553	8.28191	6.82818	7.91259	7.25191	7.44338	7.47051	8.43987
7893543	10.7991	10.9415	11.0837	10.946	10.9255	10.8387	10.5814	10.6463	9.94932	10.6593	10.375	11.0125	10.8085	10.9484	10.2482	10.7251
7893544	6.56948	6.19308	5.90192	6.66653	6.51722	6.06734	6.33739	5.99939	6.40024	6.54332	6.60677	6.35062	6.29118	6.82724	6.68211	5.79784
7893545	9.42151	9.03881	9.14858	9.26444	9.3755	8.78475	8.77651	9.07269	9.12482	8.86538	8.59491	8.8591	9.12127	8.91691	9.08991	9.43731
7893546	8.20171	7.35852	7.44164	7.69429	7.87972	7.90626	8.09224	7.54735	7.46792	7.80284	7.92383	8.11789	7.42918	8.04575	7.79352	7.3782
7893547	12.0569	11.8748	12.0497	11.9558	12.1482	12.191	12.1117	12.0438	11.7351	12.0136	12.1852	12.1713	11.9689	11.9795	12.2041	12.1519
7893548	4.99697	4.8792	4.78829	4.35054	4.80484	4.28391	6.18187	4.73774	4.15094	5.67636	3.90684	4.38808	4.45768	4.92083	4.93354	4.46575
7893549	4.82407	4.83573	5.8717	5.39426	5.18373	4.97701	5.2704	5.23361	5.60295	6.36719	5.39049	5.58851	6.87402	5.5031	5.86147	5.59921
7893550	11.4122	11.0718	11.1013	11.0782	11.1452	11.0999	11.2788	11.5238	10.4056	11.2496	11.0035	10.9829	11.7179	11.203	11.2668	11.0395
7893551	10.1517	11.0677	11.3539	10.8974	10.9781	10.7794	10.8306	10.5227	11.3874	11.5225	11.1588	11.3631	11.2581	11.0037	11.2695	10.7991
7893552	7.37315	7.72936	8.39487	7.57408	8.04992	7.33491	7.76131	8.13859	7.68222	7.83742	5.27176	8.22403	8.58171	7.81075	7.14874	7.92377
7893553	4.30363	3.57492	4.16286	3.87447	3.70516	3.93807	3.1542	3.09931	3.04505	3.26115	3.79592	4.14987	3.75804	3.74989	3.69051	3.82653
7893554	10.5225	10.3535	10.2411	10.4704	11.0078	10.3703	10.8231	10.5027	9.52865	10.2296	10.3427	10.5339	10.5587	10.8687	10.8306	10.4294
7893555	10.2981	10.1479	9.25859	8.86783	9.85771	9.7319	9.89161	9.85653	7.83992	8.97698	8.76622	8.89083	9.85275	9.5891	9.88449	9.5649
7893556	4.65331	4.1209	4.12033	4.76167	5.54497	4.45961	4.44569	3.68783	4.09466	4.77664	4.33059	4.69156	3.75718	4.87659	4.63294	4.13421
7893557	7.11969	6.02552	6.31638	6.2458	6.59249	6.50093	6.61245	7.14737	9.76843	6.60194	7.24503	7.01989	6.77718	6.82511	6.54524	6.89816
7893558	7.88543	8.32682	8.71651	8.12207	7.49949	8.33398	7.6466	7.86908	8.54384	7.73913	7.45947	8.69343	8.23437	7.99461	8.1748	8.79035
7893559	12.2344	12.3757	12.3976	12.0735	12.0909	12.1234	12.3154	12.2292	11.7272	12.6004	12.3195	12.4248	12.549	12.326	12.358	12.4978
7893560	7.19959	6.33637	6.60453	6.8058	6.85663	6.77705	6.91243	7.42626	5.31506	7.08572	6.28956	7.04123	6.59262	7.07764	6.64173	6.82025
7893561	9.80598	9.70806	9.83402	9.68565	9.82762	9.45626	10.0788	10.0604	9.0241	9.93997	9.86944	9.77816	10.4369	9.89006	9.92353	9.65313
7893562	5.28243	5.88144	4.81815	4.34399	5.95184	4.81031	5.96548	5.52741	3.79074	4.83182	4.15753	4.71116	5.45779	5.49554	5.27705	5.55093
7893563	4.12827	3.62198	3.58906	3.39535	3.22871	3.67595	3.9776	3.80097	3.63188	3.30025	3.72612	3.7102	3.78588	3.91401	3.43945	3.6221
7893564	11.1674	11.6564	11.2092	10.9524	11.1865	10.6903	11.6975	11.5979	8.9911	12.0417	12.0408	11.3314	11.8836	11.728	11.3409	11.1618
7893565	3.99422	3.88837	4.15267	3.02126	3.48908	4.57333	3.28747	3.27874	3.42156	4.13395	3.82884	3.91854	3.96438	3.7745	4.04981	4.52425
7893566	3.77141	3.29428	3.59796	3.4829	3.67533	3.39229	3.98692	3.23892	4.1347	3.93319	3.28174	3.14696	3.76476	3.59186	3.50352	3.21662
7893567	5.31878	5.00154	5.41117	5.51969	5.89978	4.91105	6.12162	5.57464	5.79816	6.1296	5.50285	5.61393	5.29036	5.52077	5.63239	5.17376
7893568	4.54266	4.6597	5.08633	4.83738	4.38047	4.35269	4.54269	4.48277	4.88745	4.41426	4.70161	4.90662	5.04413	4.63336	4.65202	4.84942
7893569	3.40088	3.19464	2.76584	2.95788	3.35767	2.95635	3.10153	2.86405	2.84986	2.67782	2.62737	3.01114	2.83189	3.16563	2.90194	2.84139
7893570	5.41387	6.07103	5.36344	5.1801	4.68178	6.10725	3.71351	4.66364	3.07293	4.7324	7.72666	5.61718	4.3884	5.26765	4.11246	6.46653
7893571	10.179	10.5022	10.4117	9.91241	10.2475	10.1072	10.4624	10.4297	9.55993	10.8772	10.842	10.8013	10.784	10.2519	10.3611	10.6487
7893572	7.58714	7.67518	7.67161	7.34328	8.08127	6.94595	8.13895	7.26217	7.09762	7.72897	7.82399	8.10982	8.35308	8.00041	7.71514	7.42514
7893573	8.40611	9.69178	9.69186	9.16778	9.72537	9.12753	10.1357	9.20699	7.98268	10.2481	10.244	9.96052	10.5279	10.4193	9.01532	9.0562
7893574	7.25941	8.90041	8.91257	8.53927	7.90625	7.92692	8.41595	7.53568	8.60714	7.85398	8.01344	8.78158	8.92199	8.31798	7.40878	8.33276
7893575	3.69841	3.81	4.09608	3.83063	4.02323	3.47522	4.14026	3.94223	3.44605	3.57179	3.54878	4.036	5.17659	3.64673	3.93373	4.41196
7893576	3.8368	3.32873	3.31455	3.44826	3.68358	3.24329	3.87651	3.82101	3.21982	3.85169	2.99423	3.15485	3.42578	3.81667	3.75272	3.05787
7893577	4.38374	3.9238	4.06804	3.76708	4.25687	3.10316	4.68742	3.80345	3.43139	3.94966	3.51141	3.83645	4.51555	3.81065	3.86502	3.48916
7893578	3.4218	3.38456	3.6901	3.78103	4.05446	3.87378	4.16411	4.31171	5.91962	4.57896	3.46142	3.15366	3.54508	3.96048	4.13168	3.79142
7893579	2.95265	2.80282	2.98131	2.78141	2.66935	2.75402	2.99821	2.79961	2.94868	2.84499	2.69713	2.81735	2.82134	2.81889	2.9654	2.70802
7893580	4.40872	4.08081	3.78482	3.84711	4.32014	3.63546	3.87353	4.21328	4.6012	4.58398	3.76995	3.54743	4.20048	3.87869	4.32612	4.31236
7893581	7.23379	6.51707	7.12564	6.69563	7.43788	7.12205	7.25229	7.04153	5.43325	7.79299	5.19564	7.39587	6.69761	6.78508	6.01108	7.90519
7893582	10.5396	11.4986	11.6169	11.2548	11.1381	11.2009	11.1142	10.7005	10.3313	11.3843	10.9868	11.4521	11.1151	11.0127	10.5531	11.1393
7893583	7.30531	5.46129	6.44289	6.17961	7.2197	6.72798	6.66906	6.91953	5.87236	7.19493	5.32546	6.95723	6.44992	6.70823	6.76331	6.66024
7893584	3.71805	4.4659	4.28625	3.74878	4.23338	4.02951	4.03084	3.8944	3.70262	4.03106	3.23046	4.12417	4.32632	3.67555	3.58472	4.89398
7893585	8.00444	5.98364	6.85549	7.81714	8.54827	7.83951	7.50304	8.2981	7.62208	8.01866	7.72875	7.79474	6.58494	8.16035	7.9914	7.48377
7893586	5.5867	5.63378	5.80445	5.52874	5.62512	6.1187	5.47631	5.93039	6.45638	5.70579	6.43542	5.76291	5.61653	6.01335	5.7845	6.67493
7893587	5.8802	5.59105	5.85648	5.50855	5.03388	4.7572	5.92563	4.98545	5.65209	6.65534	6.27477	5.18189	6.52485	6.36849	5.99141	5.51113
7893588	4.74228	4.58598	4.20861	4.5659	5.16325	3.76381	5.10385	4.97101	4.86825	4.94508	4.1306	4.40009	4.28773	4.70243	5.44795	3.92843
7893589	4.92053	4.82121	4.6809	4.60083	4.74755	5.12903	4.72108	5.20976	4.16408	4.57144	4.05306	4.44287	4.73702	4.7133	4.99675	4.52616
7893590	5.54947	5.56829	4.90866	5.64943	5.71119	5.7348	5.57271	5.69736	3.99952	5.53158	5.271	5.60959	5.35111	5.57408	5.80729	5.65927
7893591	11.5104	11.0208	11.3171	11.2235	11.6585	11.3439	11.4945	11.7696	10.8233	11.7983	11.3047	11.6295	11.2411	11.393	11.7379	11.6483
7893592	10.5906	10.1729	11.2019	10.9118	10.0837	10.5596	10.5619	10.2908	10.8412	10.6882	10.0434	10.9071	10.9615	10.9111	10.7809	10.6331
7893593	9.58831	10.0994	10.1868	10.0344	9.79054	9.7763	10.0128	9.41848	9.76745	9.88506	9.10441	9.55898	10.2402	9.79366	9.78615	9.9517
7893594	8.92181	8.70606	8.51293	8.23823	7.94871	8.47827	8.43718	9.17058	6.94946	8.44699	5.57081	7.91955	8.06783	7.69307	8.28278	8.19959
7893595	3.10786	3.02787	3.1125	3.27654	3.12336	3.12535	3.34137	3.23853	3.05669	3.55817	2.66496	3.37405	2.9052	3.03907	2.96124	3.42505
7893596	5.15862	5.65225	5.06604	4.88948	5.23689	4.81689	5.61945	4.52927	4.47928	5.64171	4.56413	5.2222	4.71007	5.53093	5.50643	5.1809
7893597	3.24914	3.30914	3.30743	3.44589	3.01488	2.86928	3.79023	3.1324	3.01244	3.76309	2.74029	2.94717	3.00489	3.50204	3.24452	4.03441
7893598	8.41922	7.38857	7.67834	8.18947	8.71471	8.56032	8.14018	8.28263	7.7725	8.15594	8.27437	8.14967	6.96456	7.72338	8.03756	8.03952
7893599	7.35278	6.49084	6.23423	6.89533	7.52819	7.67153	7.19516	7.83344	6.84526	7.35139	7.68125	7.28373	6.58033	7.27067	7.10722	7.58025
7893600	5.97304	6.27844	6.16865	6.67074	6.41484	5.52707	6.03273	6.04694	5.26869	6.058	6.62604	6.06292	6.04207	6.18369	6.40838	5.35139
7893601	6.76805	5.90654	6.12734	7.17862	7.48646	7.16189	6.4355	6.82285	6.60079	6.79077	6.29286	6.83345	5.33205	6.72872	6.66663	6.5749
7893602	10.1674	10.4535	10.6794	10.5054	10.277	10.4339	10.2786	10.2128	9.52838	10.5315	10.3472	10.5237	10.5605	10.4714	9.79104	9.91543
7893603	8.40471	9.73003	9.19396	8.44476	8.57058	8.70451	8.74374	8.3012	8.36995	9.77766	9.41603	9.19096	9.14379	9.50441	9.27924	8.82848
7893604	3.31606	3.57599	3.37123	3.34983	3.44671	3.44416	3.98191	3.40693	2.97964	3.30805	3.0329	3.85561	3.0656	3.19223	3.56319	3.31687
7893605	10.5263	8.72468	9.32373	10.169	10.9958	10.6541	10.4555	10.6662	9.83434	10.6991	10.3226	10.5999	8.87513	10.4763	10.2693	9.89745
7893606	6.59606	4.68535	5.17319	5.59588	7.40362	6.47306	6.23996	6.7094	6.96703	6.74808	5.90385	6.78116	4.84902	6.42937	6.60251	5.84848
7893607	3.40432	4.23586	4.12474	3.71106	4.24387	3.58342	3.81772	3.50127	3.76499	3.81689	4.87757	3.73141	3.76509	4.12823	3.8614	4.21666
7893608	7.26156	7.45244	7.20858	6.76611	7.43406	6.39744	6.94627	6.63153	6.06876	6.70974	6.39108	6.89626	7.17812	7.22093	6.60108	6.47345
7893609	10.6549	9.90543	11.0713	10.9327	10.1828	10.6927	10.4352	10.5964	10.7958	10.5928	10.6277	10.8237	10.8969	11.1195	11.0538	10.3758
7893610	4.48266	4.16829	4.72921	3.9255	5.33823	4.83259	3.86158	3.73841	4.09315	4.53177	4.76303	4.53812	4.05393	4.79445	4.22141	4.51172
7893611	4.92751	4.24972	4.50977	3.37016	4.34379	4.07775	5.07525	5.47918	4.34775	4.73377	4.0301	4.56314	4.08584	4.45932	4.68341	5.28032
7893612	3.71364	3.10543	3.52455	3.1684	3.20311	3.23649	3.75706	3.09112	3.77977	2.86172	2.97328	3.48366	3.30056	3.481	3.22606	3.53696
7893613	8.66957	8.24105	7.90847	8.51658	8.17478	8.40581	8.49752	8.76646	8.89084	8.11265	7.55413	8.13027	7.80008	8.23477	8.29056	8.47953
7893614	3.95986	3.89665	3.63395	3.34148	3.36292	3.54397	4.03543	4.33545	3.13505	3.50587	2.74934	4.10799	3.49456	3.80253	4.37026	4.04752
7893615	7.00368	5.8908	6.18678	5.7812	6.65887	6.08156	7.15072	7.28842	6.29929	6.9763	5.40531	6.54191	6.41927	6.01024	7.27916	6.41198
7893616	6.493	6.38982	6.50534	6.67352	6.58507	6.8204	6.13269	6.20723	6.51397	6.34883	6.18119	6.49183	6.81575	6.75874	6.40377	6.41873
7893617	7.35839	6.37075	6.1174	6.52144	6.83726	7.14359	7.15072	7.70284	8.34281	6.79013	6.60254	6.46775	6.75174	6.79029	7.26017	6.50833
7893618	4.32164	4.10579	3.8594	4.16202	4.20677	4.53856	4.18324	4.4223	3.59848	4.72018	4.65667	4.03057	4.24042	4.31867	4.41373	4.49134
7893619	8.7935	7.88441	9.12743	8.10487	8.30978	8.89727	8.59338	8.81538	9.05069	9.11584	9.26713	9.47236	9.68736	9.23552	8.86397	8.86885
7893620	2.72549	2.55612	3.55137	2.72511	2.87695	2.98626	2.70916	3.04213	3.49654	2.43777	2.62702	3.29433	3.01613	2.85282	2.71601	2.77493
7893621	3.01337	2.55018	2.55411	2.56158	2.52003	2.71089	2.73955	2.64881	2.5614	2.87849	2.69986	2.61411	2.71674	2.61358	2.6497	2.62371
7893622	4.78206	4.85122	5.12638	3.47898	5.27245	3.2041	6.32482	5.6182	3.09627	3.22097	2.74407	3.31097	3.31097	4.2489	4.70412	3.60963
7893623	4.07916	2.94514	3.63517	3.29096	3.19001	3.2991	3.66009	3.91553	3.79662	4.27252	3.08545	3.6561	3.47812	3.91197	3.34319	3.43907
7893624	4.19117	4.16969	4.63016	4.13373	3.88468	4.20891	4.41187	4.8398	4.71925	4.21369	4.46443	4.34513	4.2734	4.14112	4.65755	4.57677
7893625	2.6957	2.68343	2.67303	2.63911	2.66767	2.70583	2.69998	2.72813	2.83684	2.69492	2.68358	2.6682	2.71119	2.6609	2.71191	2.69782
7893626	4.25013	2.86161	3.26698	3.46574	3.25837	4.2431	4.1849	3.03305	3.24123	3.59403	3.11346	5.3435	3.02838	3.58905	3.21049	3.20238
7893627	4.68038	5.12167	5.5407	5.133	5.32022	5.12716	5.43875	5.06701	4.35566	5.15983	5.29088	5.52176	5.30636	5.43578	4.83972	5.27289
7893628	7.20622	8.04126	8.31749	7.88726	7.46697	7.76094	7.6459	6.58008	7.69383	7.39968	7.48014	7.9091	8.70806	8.05592	6.68477	7.71877
7893629	2.76772	2.88729	2.81932	2.7941	2.7602	3.0644	2.81811	2.61452	2.98139	2.64639	2.69095	2.91807	2.60203	2.77408	2.73598	2.72394
7893630	5.81825	5.49738	6.66127	5.71858	6.03526	5.81819	6.64009	5.75219	6.49045	6.31284	4.51717	6.88137	6.33683	6.35447	6.67714	6.25325
7893631	6.87326	6.28693	5.88868	6.15184	5.7597	6.13707	6.3513	6.73129	7.78728	6.79571	6.42401	6.30437	5.69311	6.09848	6.73394	6.39644
7893632	11.4791	12.1173	12.407	12.2749	11.9893	12.1033	11.7124	11.7086	12.125	12.181	11.857	12.5221	12.3243	11.794	12.0846	12.3294
7893633	9.85796	9.33653	9.52985	9.71349	10.2262	9.39735	9.61359	9.52588	9.72539	9.46071	9.57113	9.19207	9.38112	9.6534	9.98035	9.6704
7893634	10.5108	7.39848	8.50709	9.99388	11.0688	10.4335	10.3193	10.2683	9.29134	10.2931	9.89034	10.1845	8.02196	10.405	10.2115	8.98714
7893635	4.77814	4.29646	4.72323	3.90703	4.55856	5.00978	4.68072	4.71853	4.22515	4.17897	4.25106	4.9355	4.70674	4.30243	5.10608	4.90085
7893636	3.16113	2.80198	2.86046	2.74629	2.86917	3.10135	2.86081	2.86729	2.98445	3.05643	2.81256	3.08085	2.66577	2.77431	2.80142	3.01552
7893637	7.2715	6.35585	6.53512	6.51564	6.06353	5.92693	6.35144	6.08469	6.65952	6.81302	6.65338	6.93007	6.90876	6.9394	6.06185	6.7348
7893638	3.39249	3.1566	3.10611	3.11132	3.0204	3.52496	3.20801	3.20434	3.13618	3.44423	3.13275	3.28576	3.26066	3.02954	2.99306	3.22067
7893639	9.97509	9.69399	10.1684	9.78698	9.60019	9.97476	9.65013	9.76356	9.5512	9.93975	10.4782	9.91745	10.1093	9.97458	10.2543	9.53742
7893640	8.98399	9.39881	9.2915	8.94051	8.99734	8.82101	9.33507	9.29345	9.58458	9.58253	9.09268	9.46032	9.41754	9.5078	9.26061	9.23984
7893641	9.88528	9.63063	10.1758	10.3823	10.178	10.1977	9.64717	9.85625	9.60795	9.75526	9.65583	10.0694	10.1891	9.76965	9.88684	9.93264
7893642	11.4398	11.0028	11.5436	11.8199	11.631	11.4128	11.2516	11.4287	11.0265	11.3515	11.2075	11.6968	11.5591	11.3537	11.3146	11.2693
7893643	2.98102	2.95931	2.95356	2.93544	2.94703	2.99203	2.97986	2.98398	3.16115	2.98998	3.05643	2.96471	3.015	2.95799	2.98697	2.98609
7893644	8.04705	8.29632	8.74257	8.55873	9.56876	7.97704	8.64509	8.56336	7.04613	8.59379	6.51919	7.96681	8.65354	8.20532	7.74465	8.3264
7893645	7.412	6.79243	7.33584	7.49163	8.00673	7.60389	6.98714	6.85505	6.60411	7.98551	5.99698	7.70881	6.89249	6.70798	6.87892	7.96848
7893646	9.12334	8.53398	8.661	9.39124	9.29271	8.96254	8.62159	8.64742	7.97349	8.59913	8.61191	8.71055	8.18413	8.82312	8.84748	8.90808
7893647	10.3534	10.5523	11.353	11.058	10.8287	10.9547	10.9305	10.6764	11.1047	11.1857	11.3165	11.307	11.26	11.1656	10.7555	10.4781
7893648	4.05443	4.22836	4.40231	4.05042	5.33887	3.88115	4.54293	4.01661	5.2581	4.51713	3.54569	4.73069	4.00886	4.14462	4.12487	4.10964
7893649	7.93204	7.01598	8.70496	8.89579	8.25595	7.93108	8.34048	7.76787	8.98504	8.24871	9.31129	8.9505	8.82526	8.76861	8.64218	8.45272
7893650	11.1469	10.7365	11.5313	11.3045	11.4656	11.2875	11.3148	11.4028	10.9732	11.9789	11.7159	11.4949	11.7924	11.5677	11.6123	11.3924
7893651	8.45721	8.41697	8.41476	8.56882	8.78699	8.50144	8.18913	8.13212	8.28065	8.17676	8.49341	8.29371	8.39315	8.3707	8.41827	8.55092
7893652	4.15406	4.39855	4.44248	4.5277	4.54374	4.31301	4.82077	3.98595	4.38897	4.57721	4.17688	4.04634	4.58844	4.4775	4.82791	4.35643
7893653	6.80052	6.11168	6.10253	7.04284	6.79314	6.50942	7.05456	6.81397	5.05531	6.64127	6.50654	5.89893	5.72753	7.15509	6.00143	5.61049
7893654	7.89627	5.52036	7.79191	7.67384	7.74788	7.3417	7.4432	6.63142	6.22687	6.99133	6.09164	7.80705	7.48116	7.14306	6.65296	7.3948
7893655	4.59251	3.73067	4.48986	4.34338	4.4875	4.4023	4.07344	3.73338	5.29281	4.7905	3.79766	4.2352	4.08142	3.78014	4.34422	4.48696
7893656	5.35094	3.2816	3.36209	3.33539	4.65858	3.69868	4.66352	4.65334	3.65562	5.21534	3.17632	4.08246	3.37322	4.48574	3.77066	3.82207
7893657	7.01409	6.93816	6.14579	5.81236	5.82356	6.19031	6.90748	7.24385	5.11704	7.04599	4.73061	6.24078	7.23519	6.75619	6.74396	7.50149
7893658	5.56292	3.89654	4.96769	4.67322	5.6155	4.51854	5.51466	4.78819	6.01023	6.41974	4.31855	5.66524	5.47814	5.27408	5.57427	5.73188
7893659	4.57773	4.36908	4.4335	4.05917	4.54197	4.427	4.56143	4.48577	5.18506	4.70615	5.33316	4.51392	4.65752	4.44948	4.6983	4.65512
7893660	8.92986	8.87029	8.83843	8.83042	9.54649	8.95796	8.31203	8.47971	9.95455	8.57858	8.95261	8.55529	8.4182	8.62939	8.65879	9.04747
7893661	8.67052	7.52496	7.62924	8.55344	9.29192	8.73138	8.47999	8.663	7.63336	8.58485	8.02104	8.51714	7.02905	8.45099	8.515	7.91392
7893662	11.2377	11.4312	11.543	11.4046	11.5655	11.2353	11.4754	11.5524	10.9655	11.1064	11.0274	11.3887	11.4902	11.3872	11.3717	11.4362
7893663	5.72273	5.02642	5.48812	5.16687	5.75994	5.81366	5.68669	5.71639	7.18693	5.45521	4.87175	5.42023	4.86718	5.05462	5.5259	5.7812
7893664	8.81991	8.37711	8.82014	8.2571	8.37486	8.25306	8.70904	8.80866	8.60169	9.25895	8.25423	8.70814	8.81939	8.72283	8.91979	8.53039
7893665	4.25245	4.26303	4.7689	4.67696	4.34308	4.89343	4.24518	4.85583	4.54956	4.53724	3.41613	5.12844	4.37289	4.97321	3.9669	5.29551
7893666	3.07169	2.89742	3.03327	3.001	3.00215	2.94873	3.47411	3.34937	2.9805	3.51971	3.16832	2.91256	3.03878	3.22759	3.16572	2.93329
7893667	3.78081	3.38781	3.24544	3.26003	3.45173	3.58202	3.9532	3.22325	3.29705	3.42245	3.80213	3.55889	3.53421	3.49182	3.4316	3.81712
7893668	2.62253	2.73363	2.98664	2.96814	3.09127	3.13558	2.92636	3.18104	2.88772	4.15809	2.70435	3.1646	3.23347	3.00079	3.17651	3.15563
7893669	8.46431	3.92713	4.98528	6.05849	7.3733	6.79994	7.96563	7.23604	6.00725	7.88156	5.58873	6.8111	6.54747	7.53769	7.01439	5.15448
7893670	10.4372	8.70668	9.16784	10.1006	10.7187	10.0416	10.3354	10.1985	9.0601	10.1736	9.4821	9.82233	8.87303	10.1804	10.5653	9.25559
7893671	5.15116	4.07683	4.05527	4.11597	4.38243	3.94828	4.59083	4.43048	3.86919	4.65714	3.74616	3.44741	3.88289	4.1083	4.76192	4.01025
7893672	7.56597	6.62455	6.24187	6.72429	7.74131	7.60146	7.52397	6.86815	7.00249	7.74262	8.14473	7.72363	6.34713	6.96046	7.28802	7.19527
7893673	9.29359	8.04495	7.21101	7.74451	8.16795	6.85663	8.20888	7.65559	6.42552	7.73902	6.87347	7.5561	8.30074	6.02906	7.45909	8.83508
7893674	3.62286	3.25608	3.22328	3.23767	3.06884	2.99885	5.00484	3.56955	2.87729	3.26611	2.65811	3.67258	3.1298	3.47174	3.40093	3.28452
7893675	8.86419	7.83812	7.93435	8.50725	9.22069	8.70996	8.27866	8.39612	7.66849	8.44112	8.81151	8.76748	7.64992	8.58715	8.38762	8.13419
7893676	11.286	11.9449	11.3381	11.2275	11.4409	10.9914	11.3294	11.0474	10.4932	11.2052	11.0659	10.8566	11.5508	11.2327	10.7595	11.2881
7893677	12.0152	10.7671	11.2578	11.7592	12.3924	11.9558	11.9704	11.983	11.2518	12.0106	11.7374	11.7118	10.8797	11.9293	11.9377	11.2121
7893678	2.96716	2.87687	2.76051	3.05263	3.14174	2.82076	2.87831	3.35733	3.35784	3.30921	3.19163	2.86275	3.04574	2.99792	2.992	3.21596
7893679	3.19486	2.89433	3.05969	2.89981	3.20997	3.00783	3.26685	3.05984	3.1584	3.56078	2.70073	2.79591	3.35098	3.20073	3.21736	3.3214
7893681	2.91338	2.44421	2.48736	2.38525	2.63258	2.44531	2.79124	2.84813	2.60772	2.35475	2.45934	2.55819	2.40209	2.56091	2.7772	2.33258
7893682	7.72725	8.5418	7.89287	8.07161	7.94165	7.56755	8.9752	8.38874	7.44475	8.79507	7.0326	7.76305	8.06235	8.23583	8.69339	7.3973
7893683	6.04423	5.24051	5.91908	5.95593	6.37449	6.00362	6.27469	6.14288	5.12822	6.76574	5.355	6.15807	5.08984	5.9737	6.69935	6.00159
7893684	8.64759	8.0665	8.91537	8.65494	7.52644	8.74888	7.96509	8.91796	8.18873	7.96467	7.39488	8.65591	9.02049	7.89637	8.50172	8.8466
7893685	8.39859	9.62588	9.75483	9.34728	9.08049	9.04742	8.99058	8.46253	8.08121	9.45575	8.76544	9.72771	9.21694	9.29827	8.1595	9.16654
7893686	4.91411	4.92877	4.79461	4.60422	5.4942	4.23887	4.49735	4.40369	3.35488	4.51655	4.33857	4.27712	5.49968	6.28449	5.55198	4.58436
7893687	2.70208	2.66488	2.65787	2.62815	2.65458	2.69223	2.69344	2.70551	2.86627	2.67742	2.694	2.66046	2.69924	2.66067	2.68319	2.69526
7893688	3.62628	3.8627	4.11068	3.83666	3.97939	3.88261	4.0233	3.58876	6.16243	4.30875	3.80873	4.01692	3.74777	4.41342	3.97488	4.16152
7893689	11.0587	9.10783	10.0062	10.8415	11.6332	11.1566	11.142	11.1393	10.1877	11.1755	11.0664	10.9885	9.5361	11.1135	11.0544	10.2472
7893690	10.0673	10.5473	10.4411	10.1242	10.304	10.2198	10.4815	9.94454	10.2037	10.7727	9.84789	10.2819	10.2616	9.94619	10.1077	10.2813
7893691	2.97011	2.97436	2.90416	3.0081	2.91439	2.84006	3.15504	2.98643	2.63998	2.84966	2.72676	2.92894	2.67739	2.84312	2.94929	3.01669
7893692	10.0463	9.34083	9.50903	9.70716	10.1756	9.95043	9.43498	9.78799	9.00621	9.59655	9.74904	9.78936	9.30006	9.75598	9.9545	9.98014
7893693	5.52068	4.29952	4.77093	4.82708	4.82661	3.81199	4.8651	4.72439	3.97989	5.45399	4.32689	4.4578	5.41604	4.7551	4.9696	5.04554
7893694	2.84312	2.78579	2.58165	2.62103	2.88648	2.59225	2.62045	2.63523	2.63036	2.73363	2.49879	2.57537	2.78482	2.57299	2.73323	2.58112
7893695	7.10388	5.71604	6.14526	7.08174	7.65416	6.30209	6.99611	6.71476	8.19482	6.98018	6.97172	6.9586	5.34496	7.18225	7.26801	6.33956
7893696	7.37169	7.69522	7.20508	7.17015	7.86923	7.12937	7.73639	7.57531	9.4905	7.88741	7.06748	6.72143	7.29909	7.22092	6.9106	7.78539
7893697	5.33555	4.54407	3.98565	4.11638	4.74829	4.37788	5.09487	5.19895	3.89114	4.57211	3.73856	4.33836	4.03938	4.28932	4.65573	4.81179
7893698	5.76194	4.85755	4.9105	5.59833	5.09506	4.59675	4.84264	5.29923	3.88548	5.43562	4.12079	5.03942	4.26917	5.29923	5.31433	5.24192
7893699	5.10672	5.03109	5.42562	4.99968	5.68484	6.09601	5.65676	5.35675	5.2772	5.94295	5.51583	6.16459	5.47297	5.37629	5.86477	6.45987
7893700	8.20344	7.38408	8.5845	7.51221	7.65964	8.3969	8.4387	8.25898	8.58605	8.32395	8.37399	8.8794	8.99964	8.80187	8.33646	8.4581
7893701	9.52624	9.22514	9.026	9.56657	9.79769	9.2027	8.86076	9.08902	9.05332	9.09202	8.79085	8.89048	9.0414	9.09035	8.92546	9.21973
7893702	2.99443	2.68447	2.57424	2.63793	2.72541	3.07875	3.04141	2.68644	2.82936	2.76946	2.8465	2.75204	2.5892	2.72719	3.0267	2.69436
7893703	6.61473	4.1412	5.07195	5.24514	5.58236	5.61633	5.81555	6.00445	4.44455	6.19085	4.7996	5.11135	4.78652	5.9308	5.71778	4.95363
7893704	5.77121	4.6655	4.97666	5.41414	6.10645	5.65505	5.37745	5.22362	4.46552	5.80867	5.44807	6.08718	4.68441	5.27774	5.35182	6.0796
7893705	8.25309	4.88711	6.2506	7.69165	8.79427	8.1436	8.20551	8.21846	7.62624	8.20595	7.30119	8.00949	6.03465	8.05213	7.89132	6.68518
7893706	4.41415	3.81313	3.64413	3.79443	4.12897	3.86865	3.74235	3.74789	5.50836	3.94788	3.60909	3.63147	3.56228	4.33554	3.85494	3.69854
7893707	6.32344	6.91451	6.59937	6.55342	6.5689	6.0619	5.85349	6.43538	6.20789	6.43253	7.39977	6.30033	6.37249	6.57327	5.61978	6.39552
7893708	8.35873	7.00734	7.34073	7.97318	8.50551	8.34873	7.84304	8.22638	7.85439	8.44593	8.63403	8.10778	7.18515	8.21557	8.07719	8.03252
7893709	9.04361	9.5093	10.1318	9.46	9.66213	9.77489	9.33651	8.8203	9.8294	9.627	9.19671	10.563	9.68463	9.35715	9.6478	9.99537
7893710	9.83708	9.38258	9.60324	9.90539	10.1591	9.50015	9.23301	9.58814	9.67895	9.5603	9.36658	9.48987	9.21511	9.55004	9.30829	9.55856
7893711	5.89371	6.08194	6.34254	6.51723	5.80123	6.30161	5.33626	6.46792	8.10213	6.30285	6.89337	6.08183	6.01216	6.82623	6.05906	5.46393
7893712	3.19158	3.51714	3.21308	3.34186	3.89333	3.63417	3.62005	3.82661	3.25175	3.81647	3.27944	3.81432	3.82627	3.25397	3.53259	3.38239
7893713	6.99281	5.86704	5.94845	6.58885	7.31492	6.29159	6.24025	7.06988	5.94225	6.88659	6.0935	6.00871	6.47471	6.69822	6.47878	6.26732
7893714	7.50995	7.26711	7.39569	7.5786	7.09492	6.93598	7.87341	7.31943	8.29697	8.06957	7.57616	7.30407	7.94632	7.84431	7.20165	7.40138
7893715	8.64631	8.66222	8.89909	8.47681	8.26984	9.07957	8.52714	8.75467	9.12289	8.24781	7.50898	9.40828	9.21855	8.36671	8.26852	9.15216
7893716	3.65962	3.15201	3.29235	3.39714	3.93032	3.48328	3.89461	4.6561	3.69057	3.94312	3.87531	3.78241	4.01259	4.18756	3.61028	3.39637
7893717	6.98925	6.12661	6.59278	6.0241	6.5041	6.45947	7.42733	7.1402	4.84143	6.72524	5.09663	6.15658	6.52998	6.49493	7.00435	6.35908
7893718	3.6448	3.18877	3.5265	3.21229	3.43968	3.27403	3.66811	3.36529	3.36566	3.46682	3.36804	3.27842	3.12401	3.45611	3.44883	3.19004
7893719	4.00108	3.34962	2.9868	2.92885	3.95481	3.38631	3.9564	3.45881	2.91328	3.39416	3.29904	3.30912	3.1215	3.34985	2.98484	3.95517
7893720	8.23892	6.90044	7.18652	7.78347	8.39266	8.1559	8.19026	7.84917	6.81724	7.9965	8.57161	8.14545	7.16022	8.02398	8.11754	7.2915
7893721	6.27133	6.24528	6.87846	6.09375	5.73997	6.36679	6.20388	6.12106	7.62584	6.14695	4.82819	6.50261	6.72067	6.63844	6.75649	6.28367
7893722	6.41109	5.78619	5.97235	6.10997	6.25215	6.37547	6.97334	6.17337	7.5835	6.31137	5.54023	6.24828	6.2471	6.06176	6.23648	6.15197
7893723	3.41225	2.9221	3.327	2.96789	3.30443	3.26168	3.18604	3.19031	3.32927	3.2689	3.37446	3.18253	3.27704	3.25648	3.36856	3.06881
7893724	5.99793	5.64173	5.74105	5.93632	6.46905	6.13742	5.80574	5.95305	6.06484	5.76219	5.21878	5.79141	6.20707	5.35345	5.97784	6.56023
7893725	11.7816	9.96379	10.5466	11.6089	12.1903	11.863	11.7376	11.7948	10.7553	11.7751	11.3242	11.4894	9.88734	11.6504	11.7184	10.9096
7893726	7.08935	6.57603	7.03747	7.59864	7.78745	7.48241	6.93721	6.81134	6.07913	6.9176	6.65062	7.30711	5.92399	6.73949	6.75224	7.00017
7893727	11.9186	12.2208	11.9221	11.7427	11.7932	11.8527	12.2413	12.222	11.3584	12.2061	11.9489	12.0599	12.0346	12.0993	11.9768	12.2094
7893728	7.47391	6.86043	6.7554	6.98304	7.12049	6.72509	6.9764	6.88982	7.95148	6.90487	6.11874	6.66817	6.76216	6.7332	6.56722	7.03441
7893729	6.11324	7.22643	7.09677	6.89298	5.46671	6.66204	6.90718	6.737	7.66507	7.19732	5.76404	7.42273	6.38143	6.40569	6.93368	7.25024
7893730	5.03503	4.93009	5.25745	5.24619	4.81283	6.09617	5.09067	4.74528	5.31158	4.73173	4.06406	5.00807	4.83671	4.81421	5.67001	5.2636
7893731	8.1148	8.04688	8.37157	8.62151	8.83659	8.38385	7.77073	8.14349	10.1337	8.06266	8.80874	8.23598	8.074	8.55234	8.09346	7.93775
7893732	10.3366	10.4978	10.1106	9.87432	9.57708	9.9364	10.3771	10.1412	9.80138	9.35217	9.0464	10.1446	9.96687	9.96973	9.73811	9.84413
7893733	11.633	11.2194	11.7062	11.8244	11.5427	11.4234	11.8356	11.6683	11.4524	11.6277	11.2456	11.7112	11.9369	11.7408	11.4174	11.5387
7893734	10.414	11.0961	11.097	10.5747	10.7333	10.509	10.7746	10.7112	10.4884	10.9288	10.8693	11.0976	10.7662	10.7076	10.6272	10.7499
7893735	4.988	5.83386	4.44375	4.37318	5.36607	4.16986	5.32612	4.82607	3.84363	4.91833	3.90697	4.30453	4.60294	4.05141	4.34511	5.64656
7893736	6.76706	5.73023	6.05815	6.41274	7.24047	6.87952	6.33131	6.41024	5.16963	6.7066	3.64025	7.55824	4.81991	5.81174	6.42638	6.93619
7893737	7.2797	5.59005	5.74231	6.05596	5.67764	6.457	6.44417	5.98029	5.95122	6.01217	6.62187	6.83624	5.8414	6.53724	6.37947	6.36099
7893738	8.47262	9.09171	8.79965	8.65937	8.30094	8.01578	8.94442	9.00379	9.12405	8.80473	7.98758	8.59251	9.00068	8.43875	8.28268	8.58583
7893739	9.63211	9.21801	9.3011	9.92318	10.1871	9.84213	8.97447	9.49075	8.85981	9.41351	9.68369	9.22843	9.15967	9.40517	9.47913	9.66391
7893740	9.44638	8.35821	10.0884	9.98707	9.4798	9.93217	9.81228	9.75764	10.4349	9.98153	10.376	9.72176	10.258	10.234	9.85485	9.14406
7893741	3.11405	3.54215	3.10198	3.00099	3.26513	2.94276	3.75761	3.41089	3.0475	3.33201	3.03334	3.25504	3.33701	3.51062	3.35304	3.15476
7893742	2.85156	2.7264	2.67206	2.6423	2.78387	3.22771	2.698	2.69175	2.98405	3.08721	2.66062	2.84124	2.65522	2.77986	2.7622	2.94028
7893743	7.71639	5.48528	6.98326	7.55737	8.26076	7.76489	7.47628	7.69803	6.88765	8.35867	6.05237	7.75909	7.18629	7.55482	7.56048	8.04588
7893744	8.0496	7.30303	7.55464	7.77346	7.93007	8.00441	8.11933	8.26013	7.51601	8.21888	8.27216	7.78365	7.49233	8.1067	7.99235	7.96726
7893745	5.24702	4.87463	6.55868	6.32508	6.00891	5.51939	6.17934	5.52776	6.33384	6.08099	6.08386	6.67287	6.6067	5.93914	5.3562	6.26416
7893746	4.5302	4.83999	4.17331	3.83755	4.24152	3.34515	4.56281	4.50653	3.62228	4.16968	3.73532	3.31086	4.30423	4.16411	5.20399	3.9001
7893747	7.40345	7.73153	8.13208	8.00956	7.35595	7.5555	7.68225	6.92687	8.33149	8.46653	8.73573	7.74408	8.44357	8.11308	7.41793	7.83939
7893748	6.90688	5.46327	4.62584	5.21758	5.61642	6.08156	6.31141	6.4379	4.45714	6.11207	8.30824	6.17235	5.61058	6.09512	6.05369	6.8395
7893749	3.24321	3.07713	3.37094	3.0966	3.25649	3.52952	3.02547	3.38825	3.21776	3.78426	3.19	3.30739	2.94319	3.28568	3.51473	3.16244
7893750	4.89362	4.16851	4.52041	4.955	4.34729	5.39286	5.533	5.10374	4.5732	5.35719	6.73788	5.14415	4.50825	4.93132	5.25792	6.08946
7893751	6.06101	6.23842	6.54776	6.69218	5.77454	6.00573	6.08496	6.00838	5.31545	6.1592	6.11232	7.068	6.50292	6.36505	6.38772	7.21751
7893752	9.89643	9.83089	9.68862	9.11666	9.41343	9.70428	9.6416	9.66734	8.72723	9.78582	8.79319	9.2093	9.13097	9.43566	9.58347	9.59678
7893753	2.74497	2.63043	2.74788	2.70753	2.68361	2.54897	2.84911	2.69497	2.6233	2.65476	2.59458	2.90883	2.66606	2.7024	2.81682	2.67184
7893754	5.82446	5.4504	5.56851	5.56503	6.10856	5.88483	5.5507	5.49002	4.57291	5.76311	4.07973	5.85496	6.0314	5.88842	5.70741	6.26964
7893755	3.03639	3.20947	3.41419	3.24174	2.84949	3.36107	3.21679	3.60104	3.29391	3.308	3.31108	3.26636	2.9275	3.29639	3.20497	3.35969
7893756	3.56025	3.6312	3.83999	4.39859	3.79215	3.68637	3.80313	3.66367	4.56857	3.86532	3.35602	4.71643	4.16953	3.99425	4.13183	4.05477
7893757	4.4406	5.22094	4.67202	4.53102	4.99344	4.84494	4.77421	4.96066	3.77301	5.10312	5.7148	4.35042	4.51425	5.11012	4.77733	5.02681
7893758	4.83397	4.05542	4.1342	4.49281	3.98646	4.11773	4.27216	4.17686	4.49772	4.261	3.75337	4.46714	5.28039	4.63896	4.70749	4.46616
7893759	9.8412	10.0044	10.2718	10.0751	10.1082	9.93705	9.79941	9.95594	8.66638	9.90645	9.82	9.91815	9.84813	10.1075	9.24799	9.47908
7893760	3.24797	3.25189	3.33255	3.00519	3.36488	3.18966	3.38398	3.26714	3.38574	3.54657	3.29315	3.72971	3.44885	3.66647	3.61162	3.5922
7893761	7.28008	6.50867	6.30553	6.15438	6.04696	5.90219	7.18875	7.02995	4.88447	6.93957	4.4703	5.80721	6.07891	6.06605	6.80247	6.8725
7893762	11.952	11.5507	11.8709	11.9178	12.0013	11.9829	11.9561	12.2251	11.5279	12.1304	12.3784	11.9752	11.9638	11.9402	12.0098	12.0095
7893763	11.6623	11.2631	12.1871	11.8794	11.3794	11.77	11.6164	11.9238	11.5974	11.6489	11.502	11.9109	12.3356	11.6943	11.8737	11.5345
7893764	4.81481	4.7101	5.17798	5.47119	5.21748	5.08412	4.82808	4.391	6.71957	4.9348	4.96917	5.03555	4.74464	4.90822	4.87308	5.36418
7893765	6.77667	5.7778	6.44609	6.69272	6.22449	5.85366	5.6372	6.13774	4.76684	6.15769	5.53936	6.46655	6.26104	6.3906	6.02075	6.3765
7893766	9.65482	6.95094	8.12646	9.57412	10.4417	9.70653	9.15841	9.104	8.19011	9.3362	9.25144	9.33211	7.76264	9.4003	9.24526	8.71077
7893767	4.44423	4.48682	5.28384	5.31198	5.11211	4.67473	4.52264	4.77737	4.53585	4.86354	5.30652	4.76851	4.34287	4.8746	4.65882	4.7851
7893768	8.25601	7.89359	7.84359	7.61565	8.06057	8.17569	8.01011	8.12963	6.87237	8.17482	6.61804	7.89109	7.62292	7.55741	8.03028	8.44588
7893769	7.37045	6.58064	7.35035	7.11698	7.39772	7.41574	7.45848	7.39084	7.3372	7.59715	7.86291	7.54292	7.49281	7.23218	7.27944	7.76185
7893770	3.38882	3.15132	3.80838	3.84343	4.29434	3.72752	3.85373	3.39483	3.16515	5.06716	3.3159	4.60533	3.9226	3.79104	5.43388	4.92475
7893771	6.47114	4.43254	5.48992	5.29051	6.45115	6.48637	5.94264	6.13611	6.07625	6.45096	5.46751	6.34715	4.82042	6.27338	6.22097	5.91712
7893772	4.25103	3.98221	3.60009	3.47853	3.3595	4.1983	3.94312	4.5306	3.9703	4.05084	5.31874	4.00299	4.36271	3.80157	3.89661	4.59975
7893773	10.8757	11.1922	11.2696	10.7879	10.6449	10.6614	11.2117	11.068	10.0083	11.4002	11.4251	11.386	11.7542	11.3984	11.1833	11.1781
7893774	5.74318	6.24297	7.20333	7.19361	7.05341	6.97814	6.1527	6.49958	7.76966	6.40232	6.6983	7.06746	7.2799	6.84055	6.13723	6.86795
7893775	3.01931	2.93542	2.91695	2.83251	2.87645	3.00982	2.96039	2.99207	3.21656	2.78259	2.89209	2.92959	2.8734	2.94308	2.947	2.9386
7893776	3.22321	3.45229	3.11272	3.24175	3.17554	2.99444	3.45442	3.02145	3.2001	3.72336	3.72158	2.92288	3.18939	3.16537	3.19632	3.38249
7893777	6.64843	6.38733	6.56958	6.14837	6.50815	6.45626	6.80222	8.01852	5.91017	6.57922	5.65727	6.59026	6.79916	6.5132	6.67808	6.35097
7893778	8.77584	8.89735	9.25418	9.08731	7.80714	8.69398	8.39723	8.64643	8.58643	8.10229	7.43096	8.91615	9.37188	8.40476	8.50847	8.75916
7893779	8.20488	7.93865	8.37369	8.31686	8.04493	8.56196	7.87871	8.11024	6.62958	8.27239	8.00475	8.36305	8.41752	8.30453	8.3752	8.50791
7893780	3.48521	3.54529	3.4556	3.48435	3.33068	3.55437	3.74645	3.25721	3.42834	3.71846	3.47792	3.39893	3.57999	3.41789	3.27799	3.24454
7893781	8.79711	7.30935	7.87436	8.52087	9.02323	8.9602	8.55095	8.51079	8.3014	8.43762	8.3069	8.68164	7.25296	8.45972	8.06339	7.87463
7893782	9.21541	8.50291	10.0176	9.58283	9.26016	9.62125	9.23142	9.37984	9.77523	9.92045	9.81317	9.74853	9.7116	9.5055	9.44744	9.54488
7893783	10.6636	9.52932	9.56247	10.3531	11.0375	10.596	10.299	10.4827	9.48372	10.2823	10.5416	10.4663	9.16233	10.4515	10.5121	10.4784
7893784	8.43558	6.54463	7.63735	8.34744	8.95636	7.86488	8.34763	8.35706	7.71869	9.13027	7.56036	8.42531	8.30274	8.28235	8.63088	8.65646
7893785	11.5659	11.2212	11.5031	11.3772	11.6203	11.3914	11.5097	11.5349	10.9441	11.7695	11.2237	11.8054	11.3998	11.3484	11.6947	11.8524
7893786	7.55777	7.06407	6.37678	6.88034	7.62902	7.37694	7.28366	7.56313	5.277	7.81763	7.25398	6.93698	7.06381	7.50088	6.52493	7.90289
7893787	3.41234	3.05226	3.27864	3.16312	3.16895	3.08263	3.70352	3.00376	3.0172	3.31393	3.11152	3.47288	3.31122	3.33891	3.40968	3.07662
7893788	9.39189	9.3391	9.27578	8.97743	9.31435	8.76102	9.16774	9.39353	8.63552	9.80086	9.4648	9.43458	9.98457	8.96885	9.09263	9.28523
7893789	9.21751	6.69566	7.75874	8.89973	9.87671	9.42059	8.86266	9.01352	7.85694	8.74648	8.6807	9.01884	7.11063	8.70945	8.7072	8.38307
7893790	7.41666	6.74333	6.32215	6.62332	7.23948	6.5444	7.17668	6.90502	5.67754	6.94501	6.09739	6.20025	6.32616	6.95747	6.80014	6.65399
7893791	6.42149	5.21255	6.29473	6.15479	6.85872	5.75217	6.97419	6.76333	5.45033	6.57255	3.6214	6.75701	6.52825	6.25159	6.41855	6.48086
7893792	9.14293	9.60516	9.09778	9.00814	9.038	8.29888	9.17205	9.57897	7.39472	9.80287	9.21771	8.9779	9.71061	9.758	9.43067	9.19388
7893793	6.83632	6.87198	6.77988	6.50138	6.46734	6.16793	6.79671	6.87266	5.71182	7.37809	6.01154	6.04345	6.57891	7.1858	6.7661	6.49697
7893794	6.509	3.84664	4.88471	5.3727	6.0869	5.90611	6.61013	6.12427	5.42039	6.7066	4.57249	6.83469	4.44474	5.96371	5.92825	5.45656
7893795	5.86124	5.42786	5.49125	5.36664	5.29611	5.72566	5.65424	5.96575	5.10624	5.45298	5.4209	5.48024	5.63436	5.58594	5.86334	5.58975
7893796	7.06564	6.75136	7.51857	6.82026	7.3036	7.20626	7.00801	5.97846	8.90648	7.73707	6.89044	7.83297	7.5611	7.34957	7.34913	7.70317
7893797	5.07896	3.88228	4.63382	4.80259	5.53921	4.70151	5.7549	4.91635	4.1557	5.34231	4.94086	5.56815	5.25501	4.86785	5.50178	4.42232
7893798	3.98914	4.55993	4.45236	4.72938	3.58615	3.97331	4.02928	3.8841	4.51091	4.01361	3.32423	4.14194	4.36179	3.84741	4.06058	4.48606
7893799	3.56136	3.21997	3.23222	3.05849	3.01271	3.13511	3.45795	3.50883	4.12504	3.24819	3.00939	3.44741	3.23713	3.28568	3.42223	3.36619
7893800	8.38864	7.66857	8.14501	8.68516	9.60895	8.926	8.24293	8.56044	7.88656	8.61142	8.37936	8.84778	7.42038	8.33523	8.56495	8.41284
7893801	4.13241	4.17546	4.42711	4.55431	4.80794	4.63997	4.43225	4.41773	4.15588	4.8825	4.76391	4.55579	4.65259	4.30473	4.76043	4.71715
7893802	9.62242	8.50716	8.70241	9.63332	9.93136	9.53756	9.38633	9.63885	9.03872	9.76387	9.74732	9.48155	8.2281	9.40065	9.43635	9.2013
7893803	4.83397	4.05542	4.1342	4.49281	3.98646	4.11773	4.27216	4.17686	4.49772	4.261	3.75337	4.46714	5.28039	4.63896	4.70749	4.46616
7893804	3.77254	3.67378	3.50154	3.44063	4.32952	3.57279	4.33314	3.88539	4.73222	4.42963	3.64621	3.84436	3.30316	4.05502	3.74468	3.89815
7893805	6.78348	6.58929	6.52332	6.87063	7.03618	6.13369	6.33573	6.8053	7.95474	6.47493	5.85767	6.36357	6.26779	6.87491	6.72192	6.46604
7893806	5.88871	5.35512	5.96747	4.75381	5.82102	5.29981	5.3557	6.19306	5.98963	6.58135	5.47756	6.28698	6.97174	5.68503	4.98733	5.74333
7893807	7.75308	6.97921	6.711	7.18494	7.14266	7.36061	7.1222	7.24571	6.68947	7.45877	7.6952	7.35647	6.89828	7.12252	7.42477	8.24077
7893808	11.0487	10.7898	11.748	11.2399	11.2215	11.64	11.408	11.0056	11.3684	11.7869	11.6836	11.736	11.6173	11.2594	11.5463	11.377
7893809	8.14015	6.64566	6.95603	6.97088	7.08754	7.37532	7.46705	7.53706	7.32433	7.38237	6.42988	7.26886	7.10416	7.46942	7.9289	7.27559
7893810	5.83963	5.93603	6.26138	6.77176	6.24187	6.87016	6.10725	5.85981	7.34836	6.02163	5.78071	6.19307	5.29771	6.97042	4.83179	6.13005
7893811	5.98603	5.71847	5.87438	6.11619	6.46501	6.10534	6.16074	5.88837	5.57865	5.69329	5.1492	6.32404	5.53545	5.59107	6.10578	5.874
7893812	7.08041	4.87333	6.42717	6.56031	7.94683	6.74562	6.8586	6.86681	6.02355	7.84578	5.6678	7.2318	6.49773	7.4871	6.74548	7.03021
7893813	6.09914	5.92017	6.05112	5.6881	6.16007	6.15751	6.26649	6.56018	6.00975	6.34372	6.02099	6.05806	6.74382	6.1087	6.31004	6.89237
7893814	8.68985	6.8375	7.56245	7.58037	7.6427	7.33697	7.63433	7.49367	6.40328	6.72718	6.63901	6.7804	8.50475	8.30875	7.07048	7.40042
7893815	9.60108	10.2476	10.6865	10.4318	9.89214	10.4245	9.80384	10.2825	10.105	9.47411	9.70825	10.1988	10.2224	10.0612	9.63461	9.97815
7893816	9.87791	9.46029	9.64865	8.81793	8.94304	9.80259	9.64604	9.70322	9.56053	9.85225	9.49531	9.98445	10.0327	9.8835	9.68036	10.1261
7893817	6.86446	4.83546	5.08828	5.64314	5.67611	6.68847	6.84076	5.8183	5.44136	6.24166	4.82437	6.95181	4.55861	6.31124	5.96437	5.65684
7893818	5.97375	6.12377	5.57564	5.43298	6.25457	5.91242	5.39807	6.23533	5.88048	5.79417	6.96624	6.03291	5.63815	5.66635	5.55677	6.07145
7893819	4.7812	4.92893	3.92229	3.39445	4.10964	3.86849	4.61955	5.0644	5.45982	4.16115	3.38653	4.24618	4.95453	3.93845	4.60002	4.87642
7893820	10.6195	8.95632	9.4046	10.4699	11.0742	10.6489	10.3368	10.4288	9.14148	10.453	10.4415	10.4213	9.24556	10.4959	10.3909	9.87296
7893821	8.47638	8.16138	8.60833	8.31397	8.37384	8.44344	9.18189	8.37231	8.20069	8.95406	8.08921	8.71876	8.96847	8.95055	8.7146	8.48589
7893822	4.51082	6.12335	4.96793	4.94876	4.58653	5.43085	5.68432	5.30107	5.17134	5.15016	4.53601	5.18005	4.68995	5.30371	4.5474	4.98997
7893823	3.96965	3.63316	4.23618	3.29314	3.78283	3.25818	3.84335	3.85836	3.39269	4.10836	3.25671	3.92165	3.8548	3.36247	3.01162	3.3101
7893824	6.59356	4.08501	4.69921	5.71293	7.04502	6.2132	6.42687	6.52997	4.89716	6.33327	6.12094	6.18203	5.02815	6.17924	6.39651	5.79145
7893825	5.89287	5.23067	5.04966	5.95624	6.19047	5.9511	5.71587	5.27987	6.13366	6.43333	6.33248	5.54671	5.8163	6.55983	5.99409	5.073
7893826	3.79946	2.97827	3.29826	2.87019	3.15044	3.00917	3.44281	3.01152	4.35627	3.30197	2.80389	3.10285	3.19269	3.17879	3.57382	2.98609
7893827	9.56512	9.22909	8.1348	8.3971	8.14011	8.69342	8.43062	9.16533	6.0954	8.61003	8.74064	7.72404	8.53958	8.72233	8.74949	8.51251
7893828	5.84784	4.10843	4.30646	4.66927	4.52568	5.26274	4.56163	4.58995	4.72822	5.44758	6.4829	4.36963	4.64361	4.95719	5.41798	5.45224
7893829	3.18257	3.00902	3.01136	2.84103	3.03956	3.17102	3.26987	3.02728	3.50987	3.22094	2.83475	2.97839	2.90381	3.42442	3.15687	3.26111
7893830	4.01099	3.96051	4.13755	3.80382	4.59819	3.90406	3.94755	3.68093	3.40985	4.64361	4.55523	4.59466	3.75277	4.65	4.48281	4.10479
7893831	6.81891	6.10191	6.12885	6.27301	5.99599	6.36234	6.08131	5.70957	4.57009	6.35632	6.09465	6.24873	6.28988	6.57613	5.19465	6.07504
7893832	3.16025	4.38057	4.30028	3.84813	4.30882	3.78429	3.69871	3.85043	3.72423	4.52125	4.7063	4.27738	4.92235	3.71359	3.91806	3.95604
7893833	8.01342	7.55217	8.08015	8.03998	8.81589	7.65167	8.54582	8.57698	7.0295	8.20339	6.98498	7.57606	7.97442	8.00622	7.40983	7.88849
7893834	8.16718	8.54142	7.74085	8.26658	8.43185	8.10692	8.56506	8.50767	6.96372	8.29175	7.81648	8.23563	7.6838	8.35778	8.77673	7.8069
7893835	8.31666	8.02542	8.32921	8.66471	9.14869	8.27261	7.96413	8.0465	8.13127	8.32754	8.3574	8.12219	8.22293	8.18253	7.95377	8.50663
7893836	10.1314	9.81412	9.92087	9.88247	10.2282	9.61866	9.50583	9.67118	9.92841	9.52569	9.34038	9.42627	9.62588	9.74779	9.71333	10.0113
7893837	4.24342	4.02265	3.85477	4.44812	4.43055	4.35866	4.66332	4.94666	5.1434	4.5823	5.09526	5.11101	4.39521	4.51238	4.83184	5.02276
7893838	11.1063	9.05096	9.67833	10.9678	11.5088	11.161	10.9343	11.0559	10.2829	11.0413	10.5147	10.7859	9.26022	11.0939	11.0706	10.3347
7893839	5.4724	3.97407	4.52108	4.095	5.92034	4.64286	5.55808	5.66434	5.25116	5.50132	3.1006	6.30166	4.18897	4.45949	5.30562	5.56853
7893840	8.64681	7.95922	8.25222	8.17885	8.22434	8.07921	8.73048	8.03411	7.5672	8.79935	8.77357	8.09491	8.59943	8.70663	8.78806	8.14119
7893841	6.06083	6.33057	6.67645	7.00991	7.32864	6.67234	5.80383	6.76257	5.9832	6.61435	7.13602	6.00363	6.2276	6.7143	6.09126	7.02082
7893842	5.91459	5.229	5.30519	5.33222	5.55534	5.59535	5.74475	5.96574	5.36942	5.70059	6.23209	5.78095	5.51999	5.49409	5.50946	5.77469
7893843	4.64035	4.90383	4.95307	4.39603	5.21089	4.41353	5.52341	4.16491	5.70098	5.02229	3.81567	4.69093	4.40375	4.05636	4.65489	4.52059
7893844	3.27913	3.11715	3.35706	3.17869	3.14122	3.04165	3.27521	3.08777	6.33388	3.50661	2.74283	3.16884	3.44483	3.33426	3.60218	3.17931
7893845	3.67333	3.35664	3.60054	3.58607	4.07036	3.47971	4.08444	3.19042	4.245	4.80445	3.17955	3.90128	3.81112	3.54681	3.63965	3.56742
7893846	2.74582	2.61417	2.75511	2.81558	2.80291	2.67258	3.05044	2.73256	3.0196	3.05189	2.69775	2.79858	2.82962	3.04557	2.93858	2.81315
7893847	5.95368	6.06999	5.94621	5.84217	6.3404	6.04942	6.37928	6.44501	5.07059	6.16762	5.10276	6.30679	6.00645	6.17507	6.26053	6.49671
7893848	4.93127	5.00919	5.57487	4.15247	5.13103	4.60501	5.85725	5.3856	4.90916	5.057	4.17142	5.6669	5.05711	5.4464	5.64729	5.38722
7893849	6.78233	8.00678	7.29223	5.82923	7.38884	6.80321	7.58732	6.95518	6.19009	8.55842	4.99388	7.06809	7.55317	7.00204	7.26412	8.25636
7893850	10.0332	11.0396	10.8783	10.5988	10.7566	10.3535	11.7021	10.9334	9.60905	11.4745	11.2892	11.3876	11.5692	11.4928	10.4595	10.7548
7893851	5.80325	5.57742	5.44157	5.65093	6.00891	5.41806	5.68671	4.62842	5.64012	6.27119	3.56314	6.25118	5.21529	4.58084	5.73412	6.5829
7893853	7.1295	6.64461	7.23354	7.11057	7.73176	7.27851	6.49001	6.41006	8.26465	7.03046	7.18392	7.15539	6.74216	7.2906	7.20198	7.12252
7893854	3.12535	2.95636	2.75806	3.18322	2.96282	3.07077	3.64361	3.39113	3.39207	3.49935	2.77473	3.09901	3.17144	3.29049	3.08381	3.09431
7893855	9.29643	8.52449	8.769	9.03279	8.34633	8.76929	8.82593	9.04461	8.3393	8.90541	8.73589	8.94952	9.44522	9.61723	8.79119	8.35884
7893856	10.426	10.7944	10.6292	10.5844	10.3728	10.2909	10.5951	10.4149	9.94779	10.37	9.96935	9.97453	10.6633	10.5326	10.4134	10.4133
7893857	8.55878	6.53349	7.08069	8.11471	9.01907	8.66413	7.93432	8.19969	7.0905	8.1574	7.46984	8.70725	6.70312	8.31435	8.00138	8.24349
7893858	3.13243	2.68443	2.69755	2.70983	2.72645	2.7496	3.01501	2.7859	2.83625	2.71651	2.55806	2.74443	2.97569	2.79335	2.96679	2.70196
7893859	4.37077	3.58654	4.43074	3.98987	4.79204	4.04075	4.28902	4.93752	8.6825	4.60928	4.1427	3.89741	5.25374	4.65713	4.04111	4.22675
7893860	3.79649	3.47782	3.79009	4.65384	3.74512	3.2984	3.3693	3.59997	3.50007	4.02913	3.90123	3.36571	3.52206	3.92687	3.25453	3.38323
7893861	7.49295	6.84298	7.16095	7.41087	7.51512	7.23288	7.26726	7.22161	7.56756	7.16538	7.15728	6.8586	7.09015	7.46322	7.14006	7.37266
7893862	7.52896	7.57674	7.08131	7.09595	7.77846	6.83544	7.79284	7.56911	8.06229	8.41707	7.20899	7.6109	7.34387	7.39094	7.5498	7.36119
7893863	3.57702	3.23861	3.14222	2.92127	3.30946	3.23242	3.3879	3.06625	6.5013	3.27451	3.58278	3.14126	3.64232	3.46309	3.42853	3.26815
7893864	3.40276	3.07238	3.27402	3.26388	3.37486	3.48917	3.26533	3.79784	3.44663	3.62214	4.12126	3.20978	3.33904	3.22111	3.10052	3.51014
7893865	2.77492	2.74154	2.76897	2.77278	2.73809	2.56539	2.81045	2.98221	2.82083	2.87402	2.74379	2.63831	3.13027	2.71632	3.00204	2.74317
7893866	9.78553	9.41553	9.81719	10.3069	10.3865	9.99389	10.1225	10.1005	10.8923	10.0855	10.6633	9.82643	9.90986	10.415	10.0375	9.66065
7893867	6.18025	5.8871	5.77849	6.32303	6.38308	6.28742	6.06933	6.54646	5.21333	6.95055	6.06974	6.56551	6.36207	5.90443	6.56608	6.58304
7893868	6.67021	5.94475	6.5728	6.0641	6.35191	4.92557	6.36868	5.68985	4.01106	5.99695	4.13635	5.87463	5.82893	5.9863	5.58322	6.2612
7893869	5.81472	5.7673	6.30398	6.06371	7.21228	6.233	5.84891	4.53041	6.44647	6.72527	4.92361	7.01906	5.8434	5.28075	5.83179	6.62448
7893870	6.21378	6.31939	6.75039	6.48343	6.52503	6.24153	6.44285	6.51752	6.89082	7.12312	6.4567	6.45934	6.81099	6.4311	6.29777	6.27359
7893871	5.91423	5.6874	5.25499	5.0203	5.74386	6.36468	5.54549	5.38537	5.29103	5.28243	5.62934	5.47881	4.75763	6.04956	5.49518	5.72897
7893872	5.63384	4.40111	6.12416	6.0329	6.53218	6.08995	6.19746	5.74993	5.71876	6.73966	4.64444	7.43133	5.6371	5.97073	6.19964	7.58846
7893873	5.28858	5.06312	4.12837	4.42446	5.04261	5.73298	6.03782	5.5698	3.67995	6.15849	3.60848	4.95801	4.03614	5.05819	4.76104	5.51697
7893874	6.14744	5.81002	5.04691	5.04015	4.93428	4.85699	6.03764	5.81047	4.91269	4.12736	3.78152	4.56545	4.53809	4.90571	5.42676	4.51542
7893875	8.20818	7.70462	8.08318	8.3611	8.65971	8.37393	7.62963	7.74317	8.24741	7.84485	8.32969	7.85018	7.99528	8.05605	7.78272	8.02127
7893876	7.13957	7.06229	7.11663	7.6031	8.04104	7.44215	6.82676	6.97697	7.74725	7.81377	7.30425	8.10989	7.23064	7.363	7.66697	7.83847
7893877	7.13765	6.17748	6.19743	6.31503	7.09447	6.29877	7.36965	6.84072	5.55576	7.68387	6.24469	6.76201	6.25448	6.7082	7.24309	6.66732
7893878	6.74262	6.74058	7.27013	6.93895	6.73531	6.20041	7.15813	6.58785	6.56305	6.81871	6.99836	7.33943	7.27607	7.18586	6.89559	6.90284
7893879	5.67768	5.39055	5.07516	5.1071	5.13707	4.77936	6.13545	5.81268	3.92719	5.5291	4.7245	5.69028	4.43772	5.06172	5.62492	5.58215
7893880	11.0101	10.4864	11.2073	11.602	11.3911	11.0678	10.9646	11.1588	11.013	10.9914	10.9321	11.2438	11.2935	11.0417	11.1093	10.8486
7893881	5.88081	5.82809	5.68003	5.86985	5.90261	5.91807	5.82023	6.43651	7.92503	6.16816	5.7408	5.99594	6.34229	6.10072	6.36792	5.81241
7893882	6.00982	4.88752	5.70402	5.10108	5.00654	5.03173	5.91359	5.90618	4.99397	6.29857	5.87839	5.54513	5.83973	5.52869	6.83141	6.89054
7893883	8.48324	9.31658	9.95815	8.99709	9.51263	9.85817	8.88689	8.78935	9.83158	9.73578	9.42506	10.0294	9.49465	8.93615	9.03399	9.50616
7893884	6.46356	5.38526	5.83386	6.34258	6.60591	6.37888	6.59017	6.49296	5.57581	6.52482	6.04414	6.35217	5.79024	6.49685	6.73913	6.25153
7893885	3.31299	2.89664	3.13425	3.36432	3.10379	2.76618	2.98549	2.84813	2.85595	3.56659	2.91676	3.04859	3.13425	3.19933	3.10149	2.98549
7893886	9.27237	9.53722	9.09599	9.75339	9.46251	9.16538	9.98394	10.1071	8.2969	9.95919	9.6005	8.98595	8.94526	9.49924	10.0592	9.21952
7893887	3.35295	3.36625	3.54385	3.25747	3.4344	3.11521	3.24056	3.3915	3.33149	3.42056	3.05198	3.48615	3.31463	3.23155	3.57992	3.2416
7893888	8.21745	7.23599	8.20785	7.91858	7.18429	7.61726	7.52787	7.82091	7.32588	7.39786	6.74342	7.63088	8.64423	7.50205	7.37148	7.89308
7893889	9.04677	8.13793	8.21322	8.84242	9.42262	8.73343	8.45551	8.7776	7.89165	9.33292	7.28377	8.97734	8.18495	8.66889	8.44227	8.88761
7893890	4.90739	4.76016	4.94825	4.95306	5.12155	4.49943	5.77349	5.27204	3.95742	5.53548	4.53039	5.43581	5.81952	4.39057	5.18664	5.45685
7893891	3.98768	2.74097	2.94047	2.68081	2.90921	2.78052	3.38875	2.94768	3.45021	3.48351	2.74037	2.77869	3.14098	3.19035	2.91027	2.70305
7893892	8.9916	9.25733	8.71829	8.6333	9.09925	8.79582	9.31455	9.31566	7.54085	9.42673	8.15275	8.24644	9.39782	9.32475	8.73681	8.69998
7893893	9.25811	7.44799	8.05419	8.94777	9.5541	9.42831	9.04329	9.15734	8.1524	8.58639	8.73425	8.92924	7.85731	9.16582	8.79798	8.61934
7893894	3.51948	4.22334	3.90607	3.1749	3.62282	3.93996	3.72331	3.46023	3.88788	3.7658	3.17116	3.43929	4.13412	4.01453	3.46579	3.54102
7893895	4.50328	3.32159	4.37918	3.46603	3.11086	3.46086	3.81978	3.39353	4.17128	3.44801	2.8339	4.02442	3.77904	3.43812	3.2991	4.21316
7893896	7.93732	7.91929	7.45627	7.11135	7.84522	7.96266	7.90827	8.47421	6.67728	8.06609	7.03897	7.88611	7.27665	7.52739	7.93522	7.68867
7893897	3.25707	2.74566	2.99203	3.00919	3.28578	2.78473	2.90714	3.26764	3.24867	2.86338	2.78075	3.0715	2.79343	2.83839	3.06344	2.87754
7893898	3.9801	3.81942	3.91006	4.22366	4.32998	4.01463	3.55904	4.68626	6.57766	4.41902	4.4128	4.0373	3.87367	4.17728	4.1785	3.50986
7893899	5.80488	4.31953	4.41176	4.60762	4.4489	5.69688	5.57879	5.33397	4.90755	5.02732	4.3429	5.14082	5.04882	5.29868	5.58128	4.93587
7893900	6.74903	5.69454	6.57756	6.92826	7.49409	6.97089	6.5494	5.32104	5.50644	6.77668	6.51707	6.90735	5.66391	6.6823	6.03856	6.14454
7893901	9.00532	8.35644	8.71493	9.2452	9.75873	9.09396	9.0117	9.03398	8.96293	9.28343	8.75359	8.99856	7.96999	8.90471	9.03968	8.90912
7893902	6.66948	7.08958	6.19353	4.65749	6.82935	5.98983	6.83809	6.99777	5.56629	7.84525	4.36554	6.06774	7.01698	6.41692	6.57897	7.16077
7893904	11.8946	12.1904	12.2481	11.8727	11.8911	11.7686	12.0101	11.8942	11.4691	12.1837	11.9115	12.1532	12.1736	11.9901	12.0529	11.8742
7893905	9.21553	9.34088	9.07672	9.11486	8.75225	8.81913	8.99001	9.06914	8.58563	9.55286	8.7551	8.73821	9.58559	9.42699	9.08461	9.10944
7893906	4.06723	4.38926	4.73985	4.73975	4.97213	4.23404	4.22045	4.06634	4.53359	4.02003	4.14342	4.5241	4.56743	4.80489	3.90456	4.8477
7893907	5.70605	3.87728	4.13706	4.72074	5.63183	5.03173	3.8696	4.67974	4.21906	5.9609	3.35182	5.84463	4.70792	4.71443	4.10044	5.23181
7893908	8.08626	7.96842	8.22142	8.58349	8.08273	7.7445	9.1389	8.62658	7.79405	8.09605	7.09925	7.59145	8.54513	8.33402	7.88951	8.59803
7893909	4.48134	3.81383	4.07611	4.29556	3.90736	4.39936	4.38788	4.6189	4.15108	4.09406	3.66279	4.03412	4.05986	3.9235	4.23311	4.18567
7893910	5.53557	5.99708	5.39488	5.67835	5.65491	5.42976	5.65037	5.74871	5.09036	6.05541	5.68127	5.60965	5.46343	6.11903	5.59316	5.59639
7893911	4.67806	5.56975	5.32604	4.79326	5.40064	4.80342	5.37116	4.86292	4.29461	5.10803	3.63351	4.639	4.74656	4.62581	4.77892	4.4704
7893912	5.92259	4.91684	5.0988	5.00833	5.8908	4.30124	6.45927	5.62403	6.33089	4.55019	4.27497	4.80576	5.37216	5.08133	5.0258	4.39638
7893913	7.24094	6.85598	7.0194	6.96265	7.13018	7.61467	6.90021	6.8134	8.18348	7.07135	7.08439	8.13699	7.44842	7.53113	7.22414	7.39906
7893914	8.76753	8.70284	8.91765	9.02746	9.27422	8.53676	8.44557	8.59659	10.5413	8.61535	8.31955	8.56719	8.54538	8.66488	8.64558	8.93381
7893915	5.5983	4.3613	4.08721	4.30378	4.23909	4.67831	5.13576	4.74396	4.91419	5.65223	5.32383	5.14164	4.40244	4.5971	4.05703	4.8676
7893916	5.52822	6.32962	6.66608	6.77032	6.85807	6.26162	6.07033	6.06897	7.14542	6.46024	7.39107	6.12096	6.72659	6.88638	6.4824	5.98623
7893917	3.46757	2.83615	2.98298	3.1224	3.48992	3.02973	3.13421	2.88681	3.50783	3.07963	3.01013	2.98791	3.10898	3.24014	2.9407	3.07783
7893918	2.89911	2.99186	3.55112	3.36459	3.50271	4.28239	3.75049	3.53202	4.48796	3.17048	3.31647	4.8339	3.57725	3.06213	3.68617	3.28012
7893919	10.2159	10.1166	9.78459	10.0072	9.95094	9.82228	10.0746	10.1157	9.04449	10.0051	9.9841	9.65497	10.0172	9.95561	10.007	10.2727
7893920	4.18369	5.04083	4.58281	4.60137	5.04059	4.98364	4.2054	4.32591	4.3486	4.42919	4.69589	4.36516	4.18549	4.44593	4.73687	4.59077
7893921	8.06321	7.74045	7.87356	7.97097	7.5711	7.36014	8.1031	7.66386	7.1231	8.53323	7.36395	7.30247	7.95508	8.21432	8.11197	7.68764
7893922	8.36218	6.76713	7.27419	7.91853	8.56112	8.20168	8.18007	8.13847	7.56215	8.02444	7.22328	8.2758	7.02135	8.13011	7.84702	7.71243
7893923	11.8859	11.9384	11.6452	11.6182	11.4805	11.3891	11.9919	12.2912	10.5922	12.0993	11.8419	11.5912	12.0714	12.002	11.9077	11.8777
7893924	7.90596	7.97206	7.01509	7.05855	7.55954	6.58152	6.94041	7.00887	6.84896	6.72718	7.03413	6.83299	6.84293	6.7933	7.61601	8.3203
7893925	6.44902	4.77758	5.59673	6.2762	7.11312	6.41031	6.67216	6.16323	5.95982	7.02014	5.49209	6.08702	5.68666	6.606	6.4326	5.98235
7893926	9.78308	9.56664	9.70412	9.90685	9.45995	9.71295	9.73158	9.64015	10.1816	9.90377	10.0835	9.9185	9.79687	9.88872	9.82602	9.79887
7893927	3.777	3.4387	3.63727	3.86777	3.41406	4.10284	4.96008	3.84473	4.09351	3.77683	4.80305	4.79871	3.92064	4.13538	3.5411	3.69799
7893928	9.0793	9.03778	9.21548	9.17747	8.94076	9.29352	8.87231	9.03055	9.10352	9.3944	9.58165	9.30807	9.19388	9.2694	9.45733	9.24438
7893929	6.38689	6.18608	7.09465	7.05939	6.87752	6.06995	6.3211	6.41981	9.13571	6.50058	6.4088	6.73463	6.64839	6.74995	6.69541	6.38326
7893930	3.70633	3.87914	3.95972	4.0459	3.75706	3.75242	3.73984	3.75226	3.93241	3.63949	4.17522	4.43215	4.17613	3.57443	3.69133	3.73422
7893931	2.9189	2.791	3.09267	2.87457	2.99333	3.02897	2.85622	3.14333	3.31397	2.95277	2.80114	3.35711	3.14005	2.89631	3.48636	2.9509
7893932	6.18795	6.44648	6.04595	6.59444	7.11006	6.29677	6.00214	6.18502	6.19441	6.29494	6.61502	6.88162	6.10127	6.75121	6.21576	6.6517
7893933	8.80115	8.40983	8.6003	7.91542	8.31661	8.32607	7.99409	8.3084	8.19024	8.89142	8.75128	8.89608	8.99744	9.10221	8.74615	8.11118
7893934	4.88496	4.78707	5.4205	5.08153	5.24878	4.9044	5.61234	4.89261	7.60508	5.62509	4.5655	4.89059	4.84272	5.06713	5.4603	5.63627
7893935	2.54347	2.48363	2.56728	2.5735	2.71336	2.6081	2.96195	2.57847	3.26917	2.59192	2.62648	2.64974	2.53344	2.53693	2.64232	2.69587
7893936	5.92389	5.91325	6.07172	6.3147	6.3046	6.34343	5.87039	6.05599	7.27027	6.3782	6.77386	6.03815	5.77416	6.54747	6.43608	6.2632
7893937	9.52456	7.52341	8.21213	9.05834	9.72351	9.37609	9.1715	9.51862	8.09533	9.32636	8.51473	8.92867	7.41667	9.0812	9.11867	8.5627
7893938	7.29915	6.75065	7.03448	7.64233	7.91502	7.5664	7.10915	6.93769	5.87672	7.63123	6.68869	7.29457	6.28051	7.14608	7.45068	7.39477
7893939	7.90637	7.4319	6.95021	7.63282	7.25679	7.52307	7.66822	8.05329	8.16725	7.37856	7.2302	7.20406	7.11597	7.40814	7.48259	7.36155
7893940	4.24309	3.24389	4.42995	3.60683	3.64468	4.07332	5.33279	3.81867	4.97182	4.32162	3.79053	4.13401	4.83997	4.44574	4.38296	4.78539
7893941	6.8007	7.0416	7.12963	7.03706	6.70538	7.10377	7.13684	6.88872	6.57718	7.39338	8.14365	7.25207	7.40976	7.3167	7.24639	7.09567
7893942	4.54741	4.13998	3.96827	4.52149	4.39241	3.76108	4.29887	4.14058	4.45003	4.20174	3.40515	4.01738	3.93301	3.67766	3.82109	4.04323
7893943	4.85136	3.35008	3.87761	3.35976	4.04561	4.1037	4.81168	4.7661	5.203	4.4359	3.45828	3.99807	3.9458	4.24986	4.50915	4.42479
7893944	2.61743	2.5162	2.59056	2.6764	2.60772	2.62917	2.65202	2.75108	2.75705	2.91559	2.58179	2.74115	2.47624	2.64634	2.55665	2.53223
7893945	5.11192	3.41893	3.69907	3.90358	5.13201	4.20318	5.18143	3.88826	3.81269	5.49384	4.04388	4.23733	3.27994	4.04308	5.13284	3.55138
7893946	6.53974	7.3972	7.34297	6.89336	7.27977	6.87357	7.28244	7.10238	8.05522	7.73864	7.50916	7.0347	7.94422	7.72574	6.88757	7.20561
7893947	6.41393	6.31313	5.94901	5.8163	6.86895	5.82246	6.54974	7.13949	5.48535	6.68827	5.89059	6.30537	7.04066	6.70216	6.52943	6.03127
7893948	9.33547	9.62137	9.88421	9.59493	9.51993	9.30749	9.88465	9.6178	9.37957	9.74422	9.31576	9.37951	10.1627	9.91918	9.45804	9.59603
7893949	10.1804	8.93872	9.1344	9.94969	10.4958	10.1321	10.0101	10.0242	8.72	9.96632	9.55573	9.93359	8.81429	9.98463	10.0216	9.69935
7893950	4.13166	3.64714	3.69134	3.80178	3.37923	3.88485	3.43733	3.83031	5.58105	4.21162	3.88441	3.44326	3.9051	3.89942	3.74693	3.6154
7893951	6.81608	5.19403	4.54678	4.87855	5.63182	3.93754	6.67907	6.53509	4.09582	5.73167	3.54094	3.80925	5.51538	5.53965	6.69071	4.78688
7893952	8.79043	8.48604	8.88585	8.92516	7.63309	8.93611	8.47155	8.93633	8.59088	8.44841	8.43014	8.96139	8.98166	8.86262	8.81879	9.03064
7893953	5.33392	5.4345	5.29324	5.43572	5.49552	5.187	5.14852	5.22325	5.61652	5.1302	5.65587	5.28943	5.1309	5.49693	5.1927	5.36445
7893954	7.05297	5.98439	6.00567	6.84368	7.67602	7.17974	7.12731	6.95565	6.63869	7.20806	6.77406	6.71182	6.55822	6.77584	6.94142	6.88516
7893955	4.24912	4.22104	4.20186	4.1433	4.06939	4.01006	4.24275	4.3355	4.15585	3.83261	3.93636	4.02933	4.51463	4.06157	4.23993	3.90502
7893956	11.2908	11.7425	11.5785	11.1769	11.2868	11.1741	11.8046	11.5529	10.7381	11.8721	11.3002	11.707	11.5984	11.4599	11.397	11.7857
7893957	5.09919	4.74036	4.09818	4.7555	4.70377	4.46879	5.21296	4.9354	4.50045	5.06928	6.2504	4.67379	4.48993	4.76789	5.07772	5.28302
7893958	7.189	6.24623	6.94995	5.62237	6.92036	7.05391	6.55889	7.41163	7.22274	7.12697	5.247	7.06743	7.25658	7.16759	7.21064	7.25294
7893959	6.76887	7.46144	7.6144	7.89937	8.06017	7.59914	6.92773	6.87216	6.50744	7.30363	8.74835	6.94759	7.30408	7.53884	7.07048	7.85589
7893960	7.83071	7.53181	7.52383	8.00319	8.10847	7.53607	7.41304	7.75132	8.33009	7.71461	7.60936	7.43815	8.24973	7.7281	7.78724	7.65529
7893961	4.37575	4.73112	5.49338	5.06525	5.71262	4.95413	3.9207	4.2739	5.1923	4.83381	5.14128	5.40048	4.42063	5.2326	4.99758	4.56565
7893962	5.57042	5.56802	5.93434	5.07825	6.22101	6.03983	5.49415	6.17052	8.0689	6.32118	7.00854	5.41328	6.10456	6.48108	5.85947	4.99573
7893963	3.56365	3.09431	3.16312	3.55708	3.1358	2.76567	3.16976	3.51113	3.1321	3.10839	2.76517	2.65358	3.72174	3.23231	3.74192	3.13801
7893964	5.97687	4.96263	4.64264	4.53371	4.6444	4.83541	5.57434	4.88377	3.49694	5.84478	4.2158	4.65919	5.0961	4.23828	5.81575	6.61997
7893965	4.66461	3.63719	5.03964	4.27017	4.16088	3.66786	4.91956	4.44902	4.97245	4.5892	3.68922	4.81362	5.38568	4.33928	4.77491	4.85957
7893966	7.91573	7.59531	7.99399	7.87554	7.92035	7.53549	8.54945	8.45842	7.13602	8.68399	8.09667	8.35975	8.31669	8.13095	8.29617	8.51469
7893967	5.8334	5.83898	5.68633	5.81222	6.32446	5.65124	6.4771	6.17751	4.88984	6.56408	5.20583	5.31113	5.53771	5.86565	5.60957	5.83984
7893968	9.37365	7.54038	7.78567	7.86891	7.61226	8.16035	7.76869	8.83139	7.06988	7.90722	7.94025	7.57861	8.86189	8.2359	7.82429	8.47939
7893969	4.00431	3.24923	3.24925	3.14302	3.23861	3.17195	3.21086	3.33498	3.60118	4.16894	2.73526	3.9498	3.13644	2.95041	3.42151	3.87371
7893970	5.85226	5.3819	4.32976	4.46562	5.50445	5.02027	4.99158	5.72316	5.4462	5.94298	4.42282	4.75289	3.91765	5.17855	4.8425	5.33845
7893971	4.11739	4.25276	4.07075	4.05244	4.27509	4.50642	4.1106	4.09027	3.28149	4.23621	4.89734	4.58718	3.84353	4.22227	4.57618	3.85584
7893972	10.0807	8.18401	8.68087	9.76626	10.4716	9.90294	9.61048	9.56135	8.23816	9.46522	9.46994	9.54685	8.07831	9.68013	9.62192	8.97037
7893973	9.05561	8.88331	8.6257	7.74497	8.51745	8.54835	9.57435	8.8969	8.20286	8.82535	8.90947	8.59393	9.33085	9.62227	9.43777	8.62167
7893974	3.7618	3.37768	3.54949	3.559	3.85656	3.50848	4.01236	4.09992	4.0555	4.89114	3.44817	3.71044	4.32322	3.89471	3.68425	3.70768
7893975	2.8344	2.58532	2.75524	2.97505	2.79645	2.78921	2.94395	2.95872	2.80939	2.99243	2.77301	2.97976	2.62254	2.80804	2.93079	2.73781
7893976	4.2574	4.01173	4.04557	4.2951	3.85351	4.45961	4.39579	4.57044	4.41629	4.6903	4.76507	4.36168	4.2627	4.19219	4.5594	4.16956
7893977	2.68994	2.67482	2.7155	2.69372	2.67789	2.64044	2.71765	2.96466	2.97338	2.72803	2.64309	2.79721	2.64835	2.67714	2.77329	2.65268
7893978	4.69618	4.82212	5.36016	5.40987	4.5595	4.83307	4.33838	4.61541	3.98658	4.5751	3.54454	5.11462	4.74503	4.32477	5.0736	5.07728
7893979	8.47005	8.7007	9.02257	8.61787	8.80781	8.26357	9.3123	8.52237	7.73367	9.62378	9.43729	8.99292	9.686	9.19229	8.46962	8.65965
7893980	3.77911	4.11788	3.86206	3.7033	3.99596	3.65066	4.09527	3.81224	4.74219	4.22797	4.05244	3.90543	4.58082	3.77755	3.9203	3.96562
7893981	8.32176	8.44471	8.51783	8.41955	8.22785	8.38581	8.28835	8.19779	8.53929	8.65595	8.15589	8.63085	8.42791	8.58862	8.181	8.31013
7893982	3.62286	3.25608	3.22328	3.23767	3.06884	2.99885	5.00484	3.56955	2.87729	3.26611	2.65811	3.67258	3.1298	3.47174	3.40093	3.28452
7893983	4.71314	5.86976	5.63971	5.31543	4.20432	5.33222	5.07077	4.76144	4.53033	4.94749	4.44639	5.4418	4.7461	4.39933	5.47008	5.56996
7893984	3.28559	3.4845	3.39282	3.37136	3.47999	3.36497	3.4281	3.91441	3.45762	3.79258	3.19353	3.51698	3.45401	3.3431	3.45958	3.30079
7893985	5.81066	5.18856	4.76231	5.3441	6.28792	6.23545	5.52875	5.48436	7.05151	6.34369	5.72405	5.8913	5.79238	5.64006	5.15336	5.52678
7893986	8.04934	7.88548	8.16835	7.5421	7.40158	7.7646	8.62178	7.67511	6.60278	8.0304	7.08705	7.80823	7.97752	7.87233	8.20351	8.09035
7893987	4.39046	3.64802	3.78021	4.03483	4.75093	4.31513	4.40676	4.18925	3.00714	4.28097	3.66821	4.75849	3.93377	3.99737	4.5034	3.81492
7893988	2.60192	2.57348	2.57021	2.54785	2.56825	2.59434	2.59967	2.60735	2.7232	2.58222	2.5909	2.58072	2.59234	2.5666	2.59144	2.59591
7893989	5.89584	4.1571	4.71421	4.36434	4.23106	4.50047	6.41025	6.07544	6.058	4.68824	4.79269	4.56413	5.39918	5.13218	6.42658	6.08718
7893990	5.54993	4.13946	4.15442	4.32115	4.23126	4.45181	5.21186	3.93684	4.03512	4.57331	5.14817	4.30541	4.26542	4.83246	4.96299	4.54339
7893991	9.87578	9.69381	9.94307	9.75353	9.67124	9.77052	9.45051	9.66108	9.20565	10.075	9.44858	9.92606	9.75061	9.54002	10.3866	10.0337
7893992	6.62496	7.79689	6.38562	5.75663	7.75279	6.15144	7.23867	6.77694	5.99496	7.92391	5.40543	6.24368	6.47388	6.22609	6.2886	7.85984
7893993	10.9817	11.2253	11.0601	11.0084	10.9655	10.8186	10.1977	10.4184	11.7875	10.2059	10.3086	10.1034	11.0909	10.7084	10.6826	11.0952
7893994	4.05473	3.37333	3.45731	3.41404	3.17443	3.46023	3.39628	3.64621	3.4408	3.76232	3.12928	3.35129	3.35403	3.90063	3.91268	3.54748
7893995	3.8295	3.40304	3.89338	3.56107	3.62819	3.69611	3.40461	3.52359	6.08121	3.3797	3.58849	3.85194	3.57228	3.51583	3.65779	3.48715
7893996	4.45246	3.50002	4.58397	3.61738	3.99414	3.76065	4.25478	4.57221	3.55477	3.53633	3.464	4.68042	3.59978	3.73313	4.47705	5.14976
7893997	6.15665	5.63393	5.97738	5.9796	5.97026	6.16673	5.9874	6.37707	5.1423	6.26398	6.76137	6.03067	5.46866	5.83628	6.05833	5.91898
7893998	6.63682	5.34252	5.9173	6.06214	7.23059	5.79063	6.12811	6.06562	5.76772	7.10183	6.54929	6.33571	5.70976	6.35433	6.32043	6.2442
7893999	3.18175	3.11649	2.97868	3.16699	3.14089	3.18207	3.47966	3.38014	3.39032	2.93795	3.27044	3.05829	3.23591	3.27364	3.09276	3.18131
7894000	10.9265	9.71215	10.2376	10.838	11.1256	10.9788	11.006	11.0993	10.1211	11.0617	10.9436	11.0331	9.98743	10.8716	10.9728	10.481
7894001	8.18751	7.91825	7.7894	7.9137	8.43332	7.38997	8.91986	9.10234	6.33866	8.9932	5.46132	7.49784	8.03601	8.03535	7.87487	8.4774
7894002	6.36635	7.0618	6.02288	6.64321	6.31151	6.52137	5.30398	5.4276	4.34216	5.63222	7.11459	6.23917	6.41218	6.01926	5.83876	6.04203
7894003	3.35642	3.18598	3.10749	2.89937	2.92652	3.03463	2.95228	2.79586	2.97422	2.93952	2.95267	3.05688	3.25892	3.04318	3.06927	2.89807
7894004	3.07746	2.97945	3.04269	2.91549	3.11171	3.15806	3.28148	3.42609	3.23184	3.87621	3.10186	3.09853	3.33002	3.64108	3.14723	3.14398
7894005	8.74094	8.72721	8.79395	8.8682	8.96241	9.05331	8.62348	8.63353	9.21165	8.21931	8.99741	8.6441	8.71505	8.88702	8.63558	9.30123
7894006	5.30397	3.12086	3.09859	3.40627	4.46079	3.66829	5.74458	4.4824	3.37887	5.34946	3.03013	3.86175	3.99356	4.00462	4.09169	3.07131
7894007	10.7091	8.51952	9.12431	10.2893	11.0572	10.4683	10.3506	10.6465	9.9103	10.5971	9.55214	10.3795	8.49614	10.5342	10.3462	9.82306
7894008	8.01063	6.01491	6.48569	7.91005	8.79369	8.20402	7.49544	7.67385	6.12148	7.7853	7.02379	7.58649	6.2743	7.70507	7.39276	6.90378
7894009	6.46673	5.0802	5.55583	5.71406	6.82081	5.80607	5.51919	6.17096	4.80967	6.01779	4.7007	5.75005	5.34861	5.55283	5.36217	6.26799
7894010	7.13985	7.1076	7.03871	6.91403	6.99706	6.7429	6.8563	6.75772	6.1944	6.88303	6.54475	6.91522	7.84574	6.784	7.20502	6.7469
7894011	9.23092	8.53301	8.95498	9.14068	7.98699	8.78225	8.43298	8.66971	8.51528	8.47423	7.99458	8.59901	8.97535	8.95016	8.92413	9.16842
7894012	11.9112	11.8278	12.1063	11.8625	12.0398	12.0588	11.9201	11.9788	11.625	12.2192	12.3482	12.1013	11.9486	11.8837	12.0987	11.9628
7894013	4.11677	3.2426	3.96475	3.48344	4.01515	3.38829	4.23656	4.00768	5.20838	4.22933	3.17702	3.56274	4.17754	4.49634	3.97888	3.32721
7894014	3.27489	3.09048	3.1655	2.94338	3.341	3.20118	2.86364	3.21464	2.98693	3.23714	2.89167	3.14703	3.17296	3.07332	3.30672	3.22238
7894015	6.60081	5.97981	6.20545	6.42865	6.85984	6.5025	6.4732	6.66719	5.97971	6.57958	7.56351	6.84178	5.90561	6.64338	6.03178	6.62389
7894016	7.0387	4.71758	3.88802	4.95788	6.29324	5.42606	6.4499	6.49895	4.72646	4.50336	5.2052	5.3676	4.86803	6.18151	6.37965	4.38265
7894017	4.53364	4.1863	5.04308	5.12786	5.60448	5.54918	5.502	5.68223	5.60362	5.94503	4.67706	5.82881	4.86301	4.97327	5.3973	5.3069
7894018	6.40899	4.75337	4.74994	4.64701	5.10138	5.701	5.55786	6.05629	5.46097	5.45515	6.98591	5.32035	5.59287	5.92886	6.17631	5.90671
7894019	10.5943	10.5694	10.3367	9.38432	10.2072	10.669	11.2018	10.5973	10.3715	10.954	10.7852	10.4659	10.8707	10.8043	10.8717	10.7434
7894020	7.29472	6.08732	6.48961	6.17503	6.72321	6.35566	6.58682	7.08853	5.95197	6.63341	6.0316	6.43624	6.85976	6.72486	6.30985	6.74132
7894021	3.85263	3.53301	3.65791	3.53214	3.33581	3.72932	4.191	3.8726	3.14963	3.62394	3.08391	3.78797	3.62194	3.53909	3.92632	3.83526
7894022	4.235	5.61889	4.05851	3.91609	4.57436	3.97077	4.85425	4.36929	3.34464	4.46316	3.22163	3.77392	4.84109	3.75052	4.73946	4.37979
7894023	4.25013	2.86161	3.26698	3.46574	3.25837	4.2431	4.1849	3.03305	3.24123	3.59403	3.11346	5.3435	3.02838	3.58905	3.21049	3.20238
7894024	3.43206	3.10081	3.23883	3.06938	3.22257	3.3829	3.50365	3.46182	3.64633	3.32758	3.10674	3.23985	3.00442	3.31135	3.33498	3.12885
7894025	4.41594	3.93923	4.20357	3.42201	4.84994	4.08854	5.23067	5.39582	3.93523	4.90597	3.18546	4.08401	3.58646	3.96357	4.62005	4.19996
7894026	8.24252	8.69343	8.03181	8.42008	8.58263	8.48749	8.63777	8.73783	7.41634	9.24524	7.57897	8.07951	7.98467	7.96766	7.95174	9.22311
7894027	4.94901	4.87127	5.03816	5.3506	5.5514	5.2229	4.99906	5.21609	3.84548	5.04755	5.00084	4.88998	4.63489	5.28982	5.16447	5.35023
7894028	4.16081	4.23167	4.12031	4.23062	4.72016	4.08792	4.25791	4.54599	3.95587	4.19149	4.33818	4.41085	4.21892	4.48165	4.38716	4.46666
7894029	10.19	9.73551	9.88863	10.2533	10.1524	10.1169	9.75006	9.79428	11.7218	10.0182	10.4582	9.90503	10.1184	10.411	9.96489	10.2344
7894030	4.67996	4.19295	4.43292	4.27538	5.20373	3.88328	4.93693	4.82345	3.73126	4.85949	3.88121	4.29507	4.34722	4.9706	4.35419	4.69135
7894031	8.68444	8.27423	8.28185	8.69351	8.33299	8.28471	7.80222	8.30666	7.7513	8.7	8.99055	8.37571	8.41325	8.08271	8.10515	8.9482
7894032	3.09042	3.0256	3.18896	3.08444	3.75078	3.34939	4.0677	3.1907	2.98033	3.13698	3.26619	3.1709	3.26495	3.18969	3.67796	3.28379
7894033	11.8444	12.3078	12.1263	11.826	11.9512	11.8131	12.0116	12.0572	11.8453	12.2464	11.951	12.2771	12.0875	12.1005	11.8641	12.103
7894034	3.89442	3.55027	3.40098	3.50929	3.73981	3.73375	3.65081	4.05152	5.19526	3.85426	4.04251	3.81735	3.95102	3.9097	3.76609	4.01492
7894035	5.72554	4.6371	4.86119	4.813	4.58471	5.11069	5.64656	5.21575	3.87164	5.81202	4.18455	4.27337	4.86208	4.38524	6.16112	5.74728
7894036	11.3351	9.73332	10.198	11.0157	11.5567	11.1376	11.1972	11.1902	9.96126	10.9794	10.902	10.7755	10.0076	11.115	11.2565	10.3303
7894037	9.42792	8.13731	8.10876	9.02314	9.61694	9.51435	8.83251	9.33797	8.25795	9.09445	9.81618	9.11526	7.9323	9.07511	8.93831	9.05575
7894038	5.30854	3.79992	4.41348	4.27044	5.42067	4.84609	5.39902	5.06938	3.81332	4.53326	5.27111	4.90558	5.78831	4.56619	5.08846	4.52853
7894039	7.32578	6.4755	6.57493	6.35628	7.02456	6.45953	6.11757	6.90226	5.64391	7.37127	5.82932	6.11787	6.7837	6.57905	6.77624	6.67652
7894040	3.34219	3.01885	3.1914	3.23139	3.21237	3.49891	3.14286	3.49158	5.05703	3.73249	3.6172	3.06834	2.95461	3.60963	3.3355	2.96503
7894041	8.25368	8.62552	8.81805	8.48445	8.41676	8.56839	8.52043	8.11265	7.83984	8.93266	8.9424	8.67657	8.89178	8.53401	8.41462	8.51658
7894042	7.61546	7.37667	7.63368	7.64659	7.44201	7.57239	7.22168	7.75334	6.92868	7.88287	8.62841	7.54683	7.60138	7.68117	7.76373	7.27375
7894043	11.0041	11.3828	11.2264	11.0227	11.2839	10.7135	11.7921	11.2797	9.21258	11.5282	11.6024	10.8382	11.8275	11.7564	11.4944	10.9545
7894044	8.57728	8.76957	8.92177	8.90061	8.68838	8.52748	8.8205	8.34335	7.37935	8.22219	6.94979	8.57147	8.29852	8.39327	7.90374	8.54658
7894045	3.61314	2.94332	3.60274	3.63	3.65577	3.3727	3.98656	3.69025	3.9858	4.81153	3.47324	3.74945	3.98936	4.2455	4.13889	3.67806
7894046	6.8561	4.71016	5.84712	6.67251	7.70253	6.64855	6.8111	6.49605	5.62163	6.98478	6.48048	6.71326	5.5877	6.79926	6.93994	5.87461
7894047	3.31824	3.64608	3.78585	3.42677	3.98309	3.97603	3.38761	3.86398	3.18579	3.71291	2.87198	3.95711	4.4377	3.07821	3.34825	3.78501
7894048	8.17953	6.68043	7.1923	7.95412	8.76321	7.87148	7.67652	7.71347	6.42484	7.92759	7.63029	7.93785	6.92212	8.07102	8.01296	7.52175
7894049	5.12228	5.0449	5.13927	5.39786	5.98924	5.37782	5.66052	5.83402	5.41152	5.9301	5.60776	4.90123	5.3305	5.69124	5.81413	4.8906
7894050	4.33431	3.64816	4.19569	4.40598	4.28631	4.68324	4.37384	4.1131	5.27127	4.45797	4.07404	4.73844	4.10777	4.3424	4.20074	4.20398
7894051	12.1052	12.3554	12.4557	12.1221	12.0123	11.8322	12.1943	12.1629	11.4793	12.4204	12.4219	12.357	12.604	12.4075	12.3658	12.1351
7894052	7.27677	7.2838	6.76842	6.26998	6.99581	6.99013	7.61353	7.80469	5.98669	7.17334	5.28124	6.78595	6.8536	7.16716	7.50893	6.94335
7894053	3.26794	3.23026	3.43263	3.34294	3.15877	3.13269	3.3719	3.11173	2.73411	3.26669	2.91747	2.99593	3.32914	3.14141	3.21957	3.27685
7894054	5.56722	6.36986	5.22938	4.48529	5.91053	5.49231	5.68357	5.75219	4.29589	3.82556	3.28903	5.57266	6.42228	5.79085	5.87761	4.34346
7894055	8.88792	8.05558	8.687	8.90629	9.09665	8.44053	8.78268	9.22799	7.27607	8.55269	8.41217	8.19096	8.80866	9.11257	8.98372	8.64049
7894056	7.97274	7.5117	7.84413	7.75519	8.44967	7.55573	7.69945	7.80288	7.23217	8.92863	7.36627	8.14812	7.97226	8.02723	8.14844	8.3535
7894057	10.0245	10.6448	9.76476	10.0021	10.2521	9.90338	10.808	10.6873	9.9824	10.5629	10.5937	10.8263	10.1437	10.6554	10.2706	9.95342
7894058	10.4559	10.8518	11.1255	10.8832	11.0215	10.7984	10.7406	10.6714	9.71245	10.7346	10.5974	10.8132	10.9665	11.0169	10.2636	10.6151
7894059	6.59344	5.98098	6.25108	4.41063	5.68236	6.29477	6.17937	6.54308	4.77665	6.33633	3.7026	6.50923	5.36255	5.79919	6.84034	6.28969
7894060	5.89194	6.21258	5.96191	6.03967	6.60649	6.02441	5.99547	5.88078	5.8878	5.83994	6.40362	5.59506	5.91434	6.01461	6.14613	5.75502
7894061	8.89882	9.94968	8.41167	8.19858	7.94685	8.27035	9.08182	9.00389	7.50743	8.0123	7.82899	8.82095	8.78652	7.9662	8.34849	8.84004
7894062	9.8575	8.04482	8.53687	9.47268	10.3376	9.72818	9.47022	9.62497	8.77386	9.97498	9.527	9.67447	8.40518	9.68329	9.57655	8.86571
7894063	8.06596	7.5129	7.60948	7.93021	8.77788	7.66031	7.8132	8.03399	6.37842	8.05136	6.88721	8.08322	6.81411	7.63515	7.76869	7.50202
7894064	4.66507	4.35105	4.69965	4.65061	5.05726	4.87317	4.81246	4.81533	9.3311	4.78984	5.09097	4.60215	5.08429	4.8288	4.82523	3.7151
7894065	5.69619	3.67239	4.0308	4.54796	4.62804	4.79374	4.186	4.69414	3.86633	4.18048	4.11126	4.44236	3.55891	4.38338	4.47199	4.25921
7894066	3.37759	3.44666	3.96652	4.12859	4.15439	3.54556	3.51922	3.41571	3.91133	4.38447	4.02196	3.5955	3.23636	3.41512	3.91127	3.8453
7894067	6.51198	6.86815	7.04106	6.96241	7.06927	6.65892	7.21979	5.99588	7.24102	6.55376	7.19031	7.07038	7.42308	7.05177	6.69543	6.50256
7894068	8.39688	8.14973	8.95576	8.89727	7.99701	8.604	8.27068	8.46095	8.78112	8.80541	8.79424	8.91883	9.54709	9.41791	8.45495	8.65679
7894069	2.89029	2.90988	3.02173	3.10909	3.24857	2.90194	3.40585	3.51408	4.04702	3.59913	3.4601	3.26257	3.27231	3.3447	3.34205	3.50903
7894070	11.3947	11.6119	11.3913	11.3928	11.5124	11.076	11.6103	11.6478	10.5923	11.3293	11.6158	11.3576	11.3718	11.5576	11.4742	11.073
7894071	4.03209	3.64164	3.73879	4.18831	3.86764	3.6004	3.93462	4.11762	4.56812	3.67529	3.30412	3.58583	3.74982	3.82463	3.55257	3.95864
7894072	8.83843	8.13707	8.45684	8.66456	8.45175	8.03896	9.54451	8.71066	7.91786	9.588	8.61192	8.4323	8.91636	9.19436	8.8331	8.43413
7894073	3.76549	4.11596	4.87835	3.9493	4.95494	3.81766	4.19385	3.77923	3.99977	4.93187	4.0599	3.51011	4.36714	4.93182	3.93316	4.8055
7894074	9.73729	9.73298	9.48735	10.2745	9.71323	10.0716	9.53803	10.4644	8.11885	9.68341	9.21006	9.20645	10.2138	9.51159	10.0543	9.52021
7894075	6.33483	5.56396	5.83298	5.84196	5.69822	6.29785	5.90285	6.33684	5.5596	6.0836	5.44053	6.24623	5.80019	5.78126	6.12722	6.31149
7894076	9.49193	9.73552	9.15034	9.38744	8.96209	8.6994	9.19932	9.41271	7.92462	9.2991	8.73984	9.12071	9.63909	9.91142	9.27807	9.61762
7894077	4.41364	3.63101	3.58716	3.88256	4.07103	3.79706	4.1876	4.08159	3.49932	3.70149	3.66663	3.90551	3.46932	4.28155	4.32904	3.73513
7894078	6.25009	6.16711	6.52631	6.40937	5.9044	6.74098	6.41261	6.10387	7.58024	6.71152	8.17965	6.7665	6.41999	6.00983	6.49819	7.29428
7894079	3.52776	3.81181	3.76904	3.51926	3.25368	3.40922	3.84451	3.4118	3.27452	3.62133	3.13857	4.34631	3.41157	3.22489	4.26456	4.17083
7894080	6.66366	5.49793	6.69476	5.60773	6.39588	6.64222	7.45151	6.38922	6.08227	6.76057	6.54313	6.4673	7.10948	7.00037	7.173	6.35454
7894081	6.61527	5.56573	5.60666	5.86772	6.03558	5.43987	7.07509	6.35758	5.08925	6.89736	5.19348	5.15085	5.65833	6.36038	6.63217	6.33154
7894082	4.50081	4.09825	3.96846	3.9554	3.92771	4.70466	4.08031	4.15048	5.26866	5.11268	5.72977	4.22476	4.09079	3.76074	3.93693	4.47709
7894083	9.97686	10.3476	11.005	10.6536	10.3	10.5892	10.4047	10.4882	10.5256	10.743	10.3532	10.5729	10.854	10.9016	10.3283	9.90042
7894084	4.43024	2.79695	2.88336	3.05421	3.57016	3.05325	3.63735	3.29113	4.10306	3.64711	2.98739	3.22359	3.01696	3.04332	3.32413	3.24744
7894085	7.65968	6.67391	6.63541	6.88547	7.27911	7.2237	7.24616	7.5681	6.09341	7.34542	7.09918	7.24338	6.38303	7.13613	7.3161	6.88868
7894086	10.4013	10.6786	10.2259	10.3064	10.2586	9.99819	10.8248	10.9817	9.07349	10.9429	10.8997	10.2309	11.0016	10.908	10.8135	10.5443
7894087	9.45035	7.85112	7.98065	9.28482	10.2262	9.71331	9.26925	9.63429	8.57757	9.72527	9.6167	9.41514	7.60875	9.63338	9.30612	8.87718
7894088	6.62098	7.02832	7.21311	7.31679	7.39408	6.91406	6.54037	7.04994	6.7944	6.97822	7.38253	7.34196	7.28694	7.56731	7.31046	7.33399
7894089	9.80477	9.36	8.92108	9.0923	9.6434	9.10114	9.08175	9.23959	8.18604	8.80166	7.83964	8.7159	8.30905	8.98594	9.42427	9.40523
7894090	3.56915	3.10748	3.53648	3.6643	3.94483	3.80922	3.43228	3.16042	3.6729	2.95814	3.22131	3.461	3.12399	3.18935	3.8313	3.04821
7894091	4.61746	4.11625	4.1011	3.72939	4.49818	3.58008	5.04245	4.38402	3.45255	4.83214	3.54026	4.13977	3.749	3.98948	4.29243	3.90109
7894092	6.46339	6.39148	6.42745	6.8969	6.98806	6.67509	6.63608	5.90822	6.85493	7.01013	6.46491	6.44019	6.39972	6.48708	6.21826	6.41794
7894093	4.24309	3.24389	4.42995	3.60683	3.64468	4.07332	5.33279	3.81867	4.97182	4.32162	3.79053	4.13401	4.83997	4.44574	4.38296	4.78539
7894094	4.87102	5.10625	5.13191	5.62769	5.57048	4.91825	4.93569	5.0364	4.48272	5.44315	5.19301	5.15235	5.7446	5.35218	5.24708	5.14868
7894095	6.16185	4.7186	5.28572	5.55498	6.25335	5.48434	6.7913	6.69347	4.73941	6.06644	3.98525	5.7146	5.02868	5.78889	5.59148	5.22164
7894096	5.46727	5.96005	5.68933	5.66663	5.62193	5.58775	6.57777	6.77048	3.62009	5.94452	4.65911	5.88332	5.08542	4.66407	6.59759	6.50135
7894097	5.19601	4.70568	4.57097	5.21402	5.8091	5.1196	5.76685	5.56219	5.46742	5.77803	5.99378	6.30258	4.79744	5.19097	6.32877	6.00761
7894098	11.2079	11.7881	11.745	11.521	11.5826	11.4925	11.4344	11.1684	10.6906	11.6948	11.264	11.6687	11.5315	11.4283	11.1024	11.3808
7894099	2.95912	2.72469	3.04541	3.00031	3.01877	3.71102	3.08276	3.304	3.23922	3.11955	2.9501	2.94638	2.99997	2.89774	2.89773	2.72311
7894100	10.1005	10.5385	10.704	10.164	10.5959	10.2786	10.5331	10.3624	10.0214	10.6178	10.7427	10.552	10.8995	11.0614	10.4847	10.739
7894101	3.67265	3.82167	4.14093	4.31294	4.15755	4.12612	3.65688	3.49659	5.0058	3.9338	3.75143	4.01205	3.64482	3.87806	3.9584	3.83599
7894102	10.5705	10.3216	10.3556	10.5593	10.9132	10.4747	10.2018	10.2346	10.8763	10.0197	10.108	9.92558	10.1099	10.4862	10.471	10.5777
7894103	4.06503	4.03092	4.19112	3.69085	4.17174	3.78007	5.08051	4.69962	2.98719	5.45729	3.65761	3.75599	4.37916	4.27984	5.24772	3.96855
7894104	9.67735	9.53526	9.45332	9.56246	9.74715	9.46636	9.64046	9.88961	8.89977	9.81798	10.3089	9.34535	10.1354	9.77744	9.6885	9.44987
7894105	3.97946	4.21955	3.5268	3.74787	3.78051	3.55733	4.1339	4.93955	3.51185	3.93334	3.73913	3.61922	3.6727	4.29525	4.54235	3.87561
7894106	5.39624	5.31261	4.9951	4.92671	5.37082	5.16843	5.4785	4.98548	6.36	5.79092	5.42708	5.21117	5.01322	5.43917	4.98776	5.04647
7894107	9.72511	8.8338	10.2361	10.2033	9.91304	9.89415	9.73087	9.77224	9.46951	10.2994	10.4348	10.0998	10.2037	10.1346	10.0226	9.77999
7894108	5.88865	5.78627	5.44288	6.03381	6.14689	6.35811	5.15917	5.44104	3.44121	5.37109	6.35976	5.45389	5.17102	5.41721	5.63489	5.6508
7894109	3.61609	3.39449	3.06711	3.1297	3.32167	3.65699	3.83418	3.72087	2.99501	3.88574	3.56647	3.31254	3.39315	3.96646	3.72384	3.44316
7894110	10.4986	9.94556	10.6989	10.7306	10.6251	10.4934	10.4053	10.4249	9.8657	10.8626	10.4525	10.6898	10.8615	10.6936	10.7977	10.2977
7894111	4.48225	5.72671	4.70722	4.7219	5.61144	5.12482	4.57352	4.41862	4.40053	4.99125	4.80987	4.41956	4.37383	4.95021	4.93641	4.43803
7894112	5.25145	4.37611	4.45961	5.27573	5.16936	5.12727	5.64055	5.16666	7.17372	5.75288	5.20992	6.34442	4.23602	5.1645	5.43219	5.26722
7894113	3.87064	2.88329	2.92838	3.00281	3.09866	3.09836	3.67258	3.49332	3.07828	3.53456	2.80682	3.10571	3.22456	3.02769	3.18194	2.92781
7894114	11.8268	12.2016	12.3258	11.9061	12.1683	12.0088	12.1322	11.7159	11.6097	12.1979	12.0138	12.0189	12.3591	12.2177	12.215	12.0062
7894115	9.45292	9.79532	9.79566	9.45825	9.42132	9.57693	9.33855	9.17941	9.06296	9.00576	8.04787	9.78831	9.18822	9.22494	9.50382	9.48928
7894116	6.30695	6.40845	6.56038	6.60896	6.81117	6.1162	6.66359	6.87084	6.34495	6.57333	4.42688	6.91312	5.15746	5.80143	6.22992	6.81146
7894117	8.31773	8.1097	8.17805	8.39742	8.70926	8.2979	8.02861	8.38015	7.3297	8.0303	8.41795	7.99334	7.8354	8.20787	7.96541	8.8945
7894118	10.5722	10.7117	11.0145	10.8718	10.8487	10.7885	10.9346	10.5225	10.8031	10.7955	11.0472	10.6563	10.9575	10.8906	10.8607	10.437
7894119	8.30718	8.87829	8.81145	8.56994	8.54567	7.86935	9.60315	8.9462	7.2829	9.90141	9.25136	8.83761	9.8135	9.82553	8.80387	8.74744
7894120	5.57309	7.01737	5.18141	5.4261	6.78319	4.73229	6.42269	5.10315	4.11141	5.1611	3.40041	5.5295	5.32785	5.29678	5.83426	6.19259
7894121	5.06626	4.14206	5.68666	4.7009	5.51889	5.39088	5.30658	5.50024	4.65328	6.46083	4.32181	5.68903	4.86459	5.51741	5.71592	4.8573
7894122	12.1375	11.4797	11.6812	12.0275	12.3367	12.1544	11.9301	12.0154	11.4745	12.0514	11.7172	11.9877	11.1348	11.8416	11.9614	11.7414
7894123	3.17771	2.51008	2.92415	2.85161	2.90199	2.92689	2.75525	3.14923	2.76976	2.72287	2.62737	2.7553	2.55255	2.83414	3.57496	3.00381
7894124	6.81859	5.25159	5.36862	5.62874	6.14938	4.42412	6.72169	6.10344	5.37767	7.55332	4.78128	4.20036	5.81821	5.55274	6.92624	7.16972
7894125	9.72884	10.5808	10.197	9.64787	9.23007	9.19365	10.4603	10.2943	9.22001	10.5368	9.89301	10.5102	10.2726	10.1433	9.96281	10.2951
7894126	8.03817	5.79951	6.35255	7.60436	7.98463	7.75849	8.06221	8.2403	7.09193	7.74546	7.11592	7.5694	6.33283	7.70683	7.83722	7.0265
7894128	5.95384	5.80069	5.25419	5.88894	6.20942	5.55629	6.305	6.00718	7.34398	6.23465	6.28737	5.28931	5.18464	6.07326	6.34366	5.06459
7894129	4.93137	3.99891	3.69541	3.98763	5.55686	4.19465	5.3982	4.76204	4.85088	5.96435	4.51949	4.30413	3.93614	5.40068	5.05144	3.68206
7894130	2.95199	3.08613	3.11617	3.03929	3.06791	2.89277	3.32131	2.87249	5.51341	3.05136	3.2366	3.05833	3.24877	3.04496	3.0585	3.14607
7894131	9.26083	7.21021	8.13567	8.75488	9.47307	8.79234	8.88663	8.98703	7.55695	9.30527	8.45202	9.05451	8.08041	9.06328	8.76502	8.35611
7894132	6.28851	6.08334	6.18686	6.50892	6.05396	6.7849	6.11735	6.55004	6.48373	6.21431	7.33043	6.53986	6.25432	6.45856	6.02092	6.75383
7894133	2.96091	2.62082	2.92208	2.96364	2.86467	2.82526	2.88684	2.6052	3.13685	2.90524	2.77984	3.34267	3.06323	2.97551	2.712	2.86545
7894134	9.65068	9.18709	9.56215	9.67164	8.74507	9.03241	8.96704	9.55118	8.67828	9.08143	8.5762	9.3455	9.68168	8.93109	8.84769	9.62555
7894135	9.75836	8.78724	9.66632	10.088	10.2186	9.57756	9.79479	9.87382	9.61284	9.92228	9.6564	9.87461	9.48489	9.75763	9.78325	9.73654
7894136	10.9248	11.4643	11.1829	11.0648	11.0618	11.1077	11.3093	11.3616	10.8284	11.3737	11.0539	10.8435	11.7593	11.1807	11.1991	10.7935
7894137	3.13292	2.97389	2.98479	2.9116	3.02069	2.81632	2.93493	3.1623	2.98573	3.03807	2.84395	3.17513	2.97051	3.11038	3.28534	2.84523
7894138	7.02158	7.02148	7.25459	7.59301	7.17253	7.31216	7.26689	6.63597	8.08885	7.28634	7.45509	7.52169	6.92345	6.83385	7.44028	6.95719
7894139	3.61008	2.9908	3.21448	3.04405	3.10339	3.0617	3.16922	3.42846	3.53466	3.41643	3.1369	3.1023	3.14875	2.77714	3.08698	3.02907
7894140	5.41087	4.70557	4.61035	4.37962	5.25989	4.93367	5.45177	5.28145	4.13143	5.92674	4.49115	5.68301	4.56406	4.93316	5.31996	5.52736
7894141	5.33894	4.67829	4.84402	4.99261	5.40237	5.16029	5.35185	5.46848	4.60512	5.49815	4.62508	4.71588	5.39442	5.15417	4.80051	4.5181
7894142	6.58966	6.03376	6.51659	6.55709	6.43712	6.27741	6.34912	6.72207	5.3687	6.89019	6.0206	6.73446	6.92378	6.80247	7.10314	6.47759
7894143	3.76592	3.13395	3.57242	3.21362	3.26491	3.07079	3.83069	3.26373	4.78728	3.05708	2.59546	3.74073	3.34258	3.40741	3.03599	3.749
7894144	4.26742	3.96911	4.16899	4.6926	4.23784	4.62292	4.1025	4.09307	5.83397	4.13781	4.62079	4.52239	4.13871	4.2427	4.62637	4.61961
7894145	9.78187	8.52351	8.90304	9.7561	10.5143	9.96844	9.71939	9.71805	8.60773	9.64278	10.0461	9.90553	8.21795	9.58814	9.39578	8.97788
7894146	7.18883	6.62412	7.39045	7.70272	6.89914	6.52283	7.24393	7.09522	8.05492	7.64988	7.91134	7.08267	8.09938	7.8232	7.41228	6.98837
7894147	3.77607	4.03421	3.52943	3.56513	4.18902	3.13107	3.76198	3.61003	3.95935	3.88031	3.62413	3.75439	4.01504	3.55347	4.0986	3.68323
7894148	8.4575	8.90047	8.4459	9.0456	8.68338	8.71666	7.91743	8.15988	5.80879	8.13826	9.01681	8.0615	8.17504	8.06224	8.31143	8.57285
7894149	3.78583	3.57916	3.45992	3.61826	3.15344	3.50281	3.33724	3.43633	3.63295	3.5767	3.27353	3.51373	3.70286	3.71617	3.35022	3.99776
7894150	2.99758	3.0291	2.91447	2.79124	3.06884	2.94897	3.01541	3.09766	3.18038	2.94962	2.83332	2.81527	3.22495	2.99352	3.24252	2.68262
7894151	4.32105	4.38731	4.19324	4.56473	4.78935	4.19635	4.14048	4.15601	4.31239	4.33469	4.38382	3.96545	3.60292	4.18283	4.28036	4.19666
7894152	6.16913	6.45919	6.13975	5.82622	5.54304	5.76033	6.08608	6.0653	5.95959	6.10142	6.00063	5.55404	6.05348	6.02056	5.893	6.21136
7894153	7.89823	8.58854	8.88655	8.27219	8.50945	7.70095	7.68524	7.77834	7.0613	8.10676	5.93814	8.26271	8.54546	7.45888	7.90181	8.98058
7894154	6.47697	6.40212	5.48329	5.87385	6.33549	6.20666	6.24729	6.85502	4.67942	7.02971	5.24354	5.31201	6.08934	6.49322	5.63552	6.46683
7894155	7.6906	7.63507	7.7916	7.99701	8.46908	7.62465	7.25604	7.79387	8.34755	8.00539	8.32881	7.8752	7.60386	7.67955	7.74216	8.21582
7894156	7.34784	6.02711	6.91808	6.58328	7.68996	7.21016	6.85201	6.72075	6.22185	7.93255	4.84118	7.31039	7.05303	7.43445	7.42881	7.90076
7894157	3.02067	3.11321	3.35968	3.08006	3.04483	3.02127	3.67462	3.74638	2.93059	3.42911	2.75612	3.31721	3.22064	3.21536	3.37129	3.23897
7894158	7.93853	8.11783	7.92681	7.91279	8.51386	7.56193	8.0683	8.19936	7.56902	8.32529	8.65299	8.06904	8.7136	8.14883	7.91256	8.21426
7894159	6.52627	4.52203	5.2521	5.5527	5.90295	5.87503	5.71253	5.55461	5.13096	7.14845	5.31274	5.77724	5.28807	5.86378	6.25833	6.90468
7894160	5.7144	7.03832	7.61982	7.03234	6.89507	7.07851	5.93853	5.76161	6.50148	5.03562	6.847	6.60013	6.80198	5.53845	6.52095	5.96018
7894161	6.84135	7.15613	7.75902	8.48216	7.3796	7.07733	6.69407	6.98642	8.22941	6.76701	7.73187	6.99543	8.50418	8.69758	6.77868	6.83186
7894162	6.07085	4.99022	4.72391	4.58289	5.21233	4.82001	4.76324	5.31695	5.63263	4.81675	4.19272	4.40471	4.39997	5.52697	5.58821	4.58262
7894163	4.81751	4.58544	5.17333	4.62853	4.76041	4.85008	5.2749	4.29401	5.44593	5.03022	4.58729	5.10115	4.71583	4.6498	5.31843	4.95609
7894165	6.4355	6.30013	6.76265	5.75927	5.83452	6.00155	6.71281	5.73731	5.25137	6.77304	7.06894	6.73217	7.8549	7.52181	6.87874	5.75103
7894166	3.49397	2.94715	3.08603	2.88679	2.87798	3.11175	3.19765	3.2727	3.2771	3.32429	2.80069	3.29189	3.08296	3.16378	3.49231	2.92998
7894167	5.96373	5.38723	5.3447	5.52124	5.5784	5.81745	5.64668	5.21059	4.55843	5.15295	4.18165	5.66528	4.8655	5.44438	5.80682	5.80937
7894168	3.81019	3.86047	3.97019	3.67331	3.95029	3.74348	3.72413	3.70954	4.196	4.29973	3.77676	3.95982	3.80677	3.90418	3.94314	4.34029
7894169	5.48308	4.62024	4.89556	4.44027	5.11886	4.58656	5.03482	4.31245	7.49396	5.28048	5.92825	5.1025	5.04792	5.27931	4.96388	3.88743
7894170	5.93553	3.06349	3.0522	3.28788	4.18931	3.53513	5.53064	5.01351	3.2593	4.51968	3.18083	3.89595	3.45584	4.23108	4.66296	3.69865
7894171	10.987	10.476	10.892	10.968	10.711	10.6409	10.767	10.6299	10.5115	10.3316	10.3894	10.6666	10.9595	10.6782	10.1465	10.7144
7894172	3.81416	3.89812	3.87216	4.0295	3.90341	3.88967	3.66237	4.54676	3.74173	4.25943	3.93756	4.02532	3.78996	4.0228	4.22266	3.97528
7894173	4.65874	4.68757	4.92862	5.1352	4.9108	5.07718	5.02464	4.85628	5.44733	5.4152	5.77286	5.30411	5.05262	4.94994	4.93613	5.3951
7894174	6.36284	5.80396	5.76936	5.62719	5.69475	5.92279	5.78969	4.95644	5.59119	6.11751	5.62035	5.42541	5.41757	5.78302	5.85996	5.88495
7894175	2.77074	2.56063	2.64749	2.76152	2.83107	2.73266	3.13505	2.75736	2.75665	2.55056	2.53237	2.68513	2.55509	2.71654	2.78205	2.74075
7894176	9.08746	9.2681	8.93388	8.90328	9.33945	8.97815	9.32184	8.87042	8.01774	9.21549	7.93986	9.12065	8.58121	8.66641	9.07562	9.31733
7894177	5.70804	5.57307	5.76747	5.86772	6.05835	4.86644	5.8594	5.18252	4.95861	5.6497	4.53344	6.20205	5.79931	5.72722	5.63614	5.50791
7894178	5.93888	4.71252	4.88857	5.63928	4.97243	5.71151	5.87161	5.80104	7.21081	5.83452	7.04299	5.81727	5.23478	5.35438	5.20312	6.29485
7894179	3.42098	3.63121	3.44648	3.29744	3.68603	3.47713	3.97119	3.84153	4.07579	4.10666	3.6496	3.61214	3.44664	3.3213	3.63672	3.69961
7894180	6.182	5.52521	5.52849	4.92766	6.13002	4.98561	5.83947	5.65596	5.4976	6.33441	6.195	5.49886	5.76841	5.43833	5.37791	6.27721
7894181	8.04976	7.29089	6.4939	7.77953	8.47452	7.92445	7.82147	7.8353	5.69561	8.20201	7.62746	7.45524	7.31432	7.64317	7.88404	6.45287
7894182	4.56471	2.97452	3.76836	4.1041	4.07664	3.94357	3.67275	4.14419	3.9671	4.18412	3.72489	3.47585	3.5356	4.10932	3.91369	4.24722
7894183	5.17008	3.75746	4.12712	4.29721	5.54546	4.6265	4.61657	5.34344	4.92867	5.63426	4.5276	5.42678	4.80355	5.18003	5.38456	5.27855
7894184	5.35802	4.67011	4.53226	3.92836	4.5891	4.76059	6.91912	4.94554	5.4056	5.355	4.00342	5.74111	4.62174	5.40718	5.14492	5.33371
7894185	11.0356	10.9744	11.6324	11.2263	11.1126	11.5217	11.1578	10.7595	11.2116	11.4469	11.3657	11.5676	11.3476	10.973	11.3982	11.2631
7894186	10.2894	10.0054	11.3357	10.9161	10.25	10.8189	10.5195	10.7267	11.0089	10.8668	10.6387	11.2855	11.687	10.7634	10.8719	10.407
7894187	4.0446	3.991	3.92456	4.2383	4.51713	4.20243	3.8268	4.76835	4.67778	3.95967	4.28555	4.09008	3.79903	4.8362	4.08872	4.19461
7894188	8.49713	8.36908	8.96186	7.48926	7.94199	8.27961	8.71358	8.70437	8.57413	8.57665	8.44116	8.67395	9.26365	8.95012	8.26295	8.85075
7894189	7.55119	7.77329	7.87168	8.26995	8.42419	7.89466	7.78395	7.75726	9.62034	8.04507	8.83394	8.29285	8.25475	8.50181	7.84148	8.12483
7894190	2.77356	2.74931	2.80421	2.77467	2.80465	2.86963	2.75578	2.84126	2.82765	2.78644	2.62103	2.73208	2.76962	2.66494	2.94288	2.82619
7894191	5.36708	4.0911	3.81122	3.82768	3.75941	4.05223	4.58965	4.81317	5.38427	3.64056	3.81926	4.52521	4.02455	4.41452	4.3826	3.88391
7894192	10.0361	9.83134	9.98298	10.1837	10.4843	9.99577	9.77661	9.93959	10.6246	9.84361	9.8663	9.90185	9.54541	9.89345	9.7914	10.2539
7894193	5.08354	5.25972	5.52437	4.99072	5.09513	5.04621	4.71907	4.94491	4.07496	5.8136	5.48117	5.30562	4.8554	4.84431	4.66227	5.53444
7894194	4.20911	4.26613	4.41078	4.11953	4.65954	4.29085	4.1673	4.07825	5.8385	4.07095	5.26406	4.59362	4.61566	4.48567	3.90456	4.618
7894195	9.80263	10.3521	10.5578	10.3383	10.1155	10.157	10.3334	9.86045	9.72422	10.0633	10.4	10.0113	10.3866	10.193	9.27568	10.16
7894196	4.66051	5.83407	4.56627	4.09607	5.15486	5.14193	5.46876	5.18531	4.3707	4.30993	5.33716	4.40867	4.9009	4.65248	4.46032	4.84003
7894197	3.93274	3.18104	3.18403	3.97573	3.18362	3.9246	4.03282	2.974	3.21983	3.91446	3.60828	4.07238	3.62133	3.53843	4.74705	3.80508
7894198	2.55208	2.54626	2.53486	2.51912	2.53865	2.55063	2.56097	2.60993	2.68673	2.55819	2.54947	2.53802	2.53971	2.52763	2.54169	2.55167
7894199	3.65871	3.70922	4.06828	3.76983	3.12077	2.83018	4.24856	3.85774	3.57685	4.7428	3.73207	3.6465	5.20095	4.53552	4.21303	3.51075
7894200	5.48341	3.62305	4.59913	4.20097	3.87633	3.95224	4.47693	4.71847	3.1795	5.49858	3.03136	3.9585	4.12835	4.88236	4.8191	4.46428
7894201	5.57092	5.18954	5.2653	5.3006	5.35975	5.69753	5.64891	5.81919	5.68006	5.6775	5.41849	5.33212	5.25127	5.43952	5.887	5.78197
7894202	5.23254	5.27809	5.26369	4.86921	5.9386	5.31643	5.16251	5.7891	5.21428	6.17007	5.30807	5.59296	5.3364	5.92076	5.54222	5.23901
7894203	8.55581	8.4944	7.12347	8.085	9.17089	8.63305	8.12927	9.36635	7.05107	8.6592	6.4784	8.20846	8.00277	7.84915	7.51743	8.7345
7894204	7.47327	8.20222	7.83995	7.10825	7.30708	7.31374	7.50736	7.43201	6.76907	7.89186	4.5982	7.58678	8.14081	7.54554	7.01957	7.30717
7894205	10.0977	9.9321	10.0546	9.91352	10.2551	9.42124	10.0365	9.77962	8.2815	10.2674	10.0647	10.1302	10.6448	10.3457	10.1971	10.0958
7894206	4.01346	3.13235	3.31335	2.77969	3.94878	3.37839	3.85499	3.89634	2.70362	3.63748	2.89029	3.47733	3.49749	3.23293	3.43672	2.93886
7894207	10.8251	9.83265	9.59083	10.5238	10.9804	10.546	10.5124	10.3879	9.38981	10.3143	10.3471	10.0793	9.50422	10.7917	10.4394	9.98082
7894208	3.41092	4.75039	3.78597	3.82153	3.40085	3.81206	4.62814	5.25483	3.73162	4.5865	3.84977	4.10513	3.31276	4.28002	3.92396	4.32198
7894209	7.79527	8.30352	8.17699	8.0769	7.71633	8.08015	8.24267	8.0898	8.03829	8.20148	7.00398	8.65336	7.74365	7.86872	7.87834	8.39359
7894210	6.89171	3.63048	4.75621	5.05253	6.95694	5.65792	6.62931	6.21683	4.08911	6.47249	5.18371	6.31736	4.17912	6.26133	5.90424	4.5036
7894211	8.81074	9.04544	9.42354	8.78131	8.79686	9.42586	9.10991	8.65645	9.70547	8.33566	8.43654	9.87208	9.5095	8.53638	8.70256	9.282
7894212	8.10252	8.4243	9.43526	8.30913	8.94149	9.02576	8.38467	8.65526	9.00329	9.55583	8.50594	9.3548	9.9636	8.7747	8.40143	8.5333
7894213	9.55552	8.13784	8.42781	9.21471	10.0605	9.49976	9.15229	9.3652	8.17251	9.2981	9.19127	9.1833	8.13489	9.50585	9.18399	8.8239
7894214	10.2266	10.9259	10.1476	10.2583	10.1156	9.94614	10.618	10.2972	8.9937	9.97909	10.415	10.1641	10.4541	10.1344	10.3627	10.3023
7894215	5.87324	5.70007	5.71244	5.95434	6.38981	6.00456	5.20926	4.82306	5.80258	5.09038	5.70451	5.94034	4.99192	5.60223	6.00437	5.72182
7894216	6.41898	3.95777	4.21661	5.52634	3.70031	5.16215	6.01463	5.29313	4.74851	5.104	4.23625	6.05162	4.60641	5.84327	5.82354	4.85377
7894217	4.99856	5.73378	5.62668	5.47538	5.55111	5.13531	4.73886	4.79262	5.35448	5.39511	4.55792	6.00121	5.38387	5.20858	5.41377	5.94659
7894218	7.74138	6.9818	7.47333	7.65147	8.10268	7.48245	7.16195	7.25043	9.77226	7.19128	7.36772	7.63136	7.14637	7.73964	7.31905	7.33134
7894219	5.4754	5.17318	4.62926	4.42482	4.08899	4.43871	4.6246	5.07611	4.06138	4.6151	4.70187	5.08236	5.14993	4.75061	5.0769	4.61021
7894220	8.01513	8.1203	7.89782	7.63903	7.39684	7.79927	7.25596	8.10266	6.75293	7.24152	7.11672	8.22228	7.55178	7.41562	7.28818	8.46886
7894221	4.30441	3.8435	3.65717	3.72262	3.83442	4.18837	3.8744	4.64199	4.08611	4.48276	3.23998	3.64291	3.93987	3.52993	4.56043	4.14
7894222	3.27313	3.24617	3.24295	3.50913	3.31171	3.24281	3.3959	3.22409	3.595	3.38518	2.99551	3.39016	3.467	3.13709	3.6075	3.54396
7894223	10.8661	9.27835	9.569	10.3613	10.9031	10.5185	10.7663	10.6737	9.73851	10.7411	10.1323	10.3462	9.33503	10.3695	10.6352	9.87912
7894224	6.66468	5.69365	6.3021	6.43039	6.2422	6.33518	5.77544	6.35633	5.29585	6.16732	6.80343	6.09017	6.48647	6.48912	6.41637	6.96882
7894225	6.38612	5.71292	6.05893	5.29269	6.26323	5.82123	5.60651	5.68346	8.08586	6.1067	5.70388	6.01915	6.28994	6.1508	6.6954	6.16366
7894226	8.92879	9.02497	8.40696	8.92125	8.4664	8.35829	9.30603	9.21877	7.54576	9.32115	8.65299	8.60701	8.3278	8.70792	9.24815	8.72067
7894227	3.02925	2.93689	3.12773	3.34115	3.13336	3.10855	3.41721	3.53701	3.08866	3.25109	3.26856	3.17569	2.72775	2.82298	3.15089	3.25805
7894228	4.16272	3.75187	3.90451	3.72017	3.77964	4.4301	3.84141	4.10202	6.39699	4.6745	4.46415	3.9302	4.44721	3.85866	4.05778	4.21784
7894229	4.1552	4.50607	4.32852	4.53151	5.33566	4.49349	4.61856	5.01494	5.80513	4.46508	4.12176	4.68538	3.92579	4.57787	3.92898	4.94606
7894230	4.88244	3.64829	3.90056	3.9448	5.02153	4.35715	4.5302	4.70998	5.44593	4.73342	4.15562	5.05615	3.96458	4.38104	4.91258	3.87711
7894231	5.44295	6.36406	6.5109	5.97922	6.66164	5.93603	6.83615	6.17502	4.88701	5.8181	5.2503	6.7804	6.44385	5.92612	5.84936	6.42798
7894232	9.97171	8.55008	8.75325	9.70304	10.3379	9.80194	9.80308	9.75738	8.97911	9.62355	9.34856	9.64643	8.14545	9.63614	9.65228	9.23044
7894233	5.75885	3.99808	4.07045	4.53347	5.15955	5.34244	6.26066	5.69938	4.91473	5.27286	5.07076	4.83244	4.14005	5.0186	4.91473	4.83491
7894234	7.02835	5.42613	6.16329	6.29859	6.31402	6.2443	6.88795	6.67588	5.81099	6.55182	5.70715	6.75471	6.36279	6.86092	6.47352	6.51591
7894235	8.11111	7.51016	7.36601	7.64633	8.17891	8.0223	7.76561	8.01423	7.28987	7.82817	8.5933	7.51927	7.49705	7.81541	8.17309	7.53723
7894236	11.9689	11.5088	11.5784	11.9494	12.347	12.0812	11.7506	11.9386	11.3493	11.9251	11.7975	11.8764	11.5026	12.0186	11.9736	11.7445
7894237	6.99137	5.03728	5.651	6.27817	7.28601	6.60716	6.41674	6.32444	5.68978	6.75242	6.30978	6.87457	4.91927	6.55673	6.13357	6.22141
7894238	3.10986	3.76402	4.34547	3.35738	3.18918	3.51378	3.55088	3.15417	2.70435	5.03562	3.72256	3.48406	4.41705	3.44515	4.12371	4.0222
7894239	11.3741	11.0648	11.6393	11.5895	11.4155	11.4285	11.1101	11.1573	11.1743	11.0585	11.3565	11.436	11.1348	11.1549	11.4797	11.4765
7894240	4.90847	5.79917	5.08488	5.41254	5.83302	4.75128	6.38365	6.29337	4.76382	6.68916	4.67639	4.74052	5.30029	5.6467	5.94531	5.90644
7894241	7.28944	6.70211	6.0833	6.49405	6.88219	6.42198	7.43687	7.35011	6.1307	7.36707	5.79924	6.83818	6.70676	6.41774	7.03399	6.70693
7894242	4.55311	4.59003	5.13767	4.80517	3.95093	3.84402	4.46699	3.6639	4.04759	4.06627	3.75772	4.56971	4.84905	4.64505	4.85571	5.41647
7894243	3.10633	2.65943	2.78954	2.68924	2.96557	2.92914	3.06458	3.25513	2.61993	3.37892	2.49879	2.82349	2.85855	3.01276	2.99732	2.76618
7894244	5.72771	5.35537	5.20417	5.59519	6.03958	5.71558	6.34811	6.61675	5.17482	6.28371	5.32236	5.89958	4.47854	5.80252	6.31697	6.06863
7894245	3.02433	3.02063	2.78811	2.77757	2.86677	3.05218	2.75176	2.8256	2.66585	3.40536	3.99594	2.8581	3.12606	2.99101	2.94331	2.88456
7894246	6.6251	5.93645	6.05597	6.81493	7.09635	7.05144	6.78729	6.96882	6.12209	6.71646	7.39535	6.85486	5.67779	6.82805	6.46844	6.37191
7894247	6.1679	6.29839	6.83234	6.17494	6.7935	5.95773	6.47309	5.7419	5.4412	6.7586	5.1481	6.61572	6.16165	6.59389	6.17662	6.52781
7894248	2.87077	2.735	2.92653	2.79499	2.77452	2.90831	2.82067	2.81106	4.13265	2.69834	2.72198	2.9005	2.77571	2.76231	2.82171	2.79652
7894249	9.38503	7.60348	8.11553	9.09174	9.84818	9.19909	9.06626	9.35497	8.30114	8.96073	8.76095	9.13306	7.5781	8.98971	9.07465	8.5845
7894250	3.27215	3.30368	3.12292	3.41922	3.31555	3.16065	3.19768	3.28331	3.48854	3.41484	3.97638	3.21738	3.46676	3.45345	3.2192	3.29992
7894251	4.58466	5.4272	5.9892	5.73637	5.66521	4.81448	5.51234	4.71131	6.15701	6.00023	6.24841	5.59997	6.71778	6.17426	5.73497	5.21826
7894252	9.82728	10.4523	10.5332	10.0532	9.74079	9.7101	10.3439	9.47132	10.156	9.59946	8.64169	10.6802	10.588	10.2502	9.68784	10.2757
7894253	3.79287	3.57797	3.78087	3.75813	3.57894	3.82916	3.79835	3.92911	3.89058	3.80985	3.79308	3.99595	3.30474	3.75681	3.69845	4.17136
7894254	6.35027	5.24397	5.34917	5.61869	5.84324	5.71753	6.41568	5.93039	4.97081	6.98777	5.53718	6.14499	5.72348	5.99519	5.36383	5.99336
7894255	3.16197	3.03056	3.32562	3.17326	3.26587	3.36601	3.22482	3.20414	4.94127	3.64281	3.11427	3.8948	2.92219	3.25134	3.38071	3.34031
7894256	10.4795	9.08554	9.18276	10.1767	10.7282	10.2684	10.2289	10.2731	9.31953	10.2372	9.68517	10.1527	8.84901	10.1971	10.2605	9.55638
7894257	6.15928	5.61468	5.75436	5.87564	5.47052	5.89646	5.5389	6.01869	5.27692	5.86352	5.51998	5.78196	5.86559	5.96888	5.75257	6.30538
7894258	9.03683	6.62924	9.98021	10.0343	9.4547	9.07348	9.39748	9.20527	9.75893	9.6603	10.5429	10.0338	10.1353	9.95608	9.97762	9.29703
7894259	3.49198	3.22143	2.93201	3.04056	3.29258	3.53472	3.30724	3.74581	3.4117	3.25574	3.32252	3.22356	2.82713	3.23927	3.53233	3.18086
7894260	6.1594	5.46197	6.32737	6.04372	6.10172	4.87357	5.62622	5.48545	5.83799	5.99174	4.34723	5.43581	6.04412	5.26458	5.82101	6.28775
7894262	9.71678	9.56303	10.908	10.2996	10.2002	10.4331	10.1755	9.76025	10.3849	10.9941	10.7922	10.7549	10.8152	10.2769	10.5144	10.2246
7894263	10.9968	11.2929	11.3876	10.9118	10.8758	10.7729	11.2856	11.2765	10.1949	11.5248	11.7061	11.4901	11.8174	11.5913	11.2641	11.3144
7894264	10.2074	10.0064	10.6895	10.4519	10.3392	10.9296	10.1487	10.1529	10.7166	10.3281	9.99609	10.7265	10.1862	10.1742	10.5298	10.4481
7894265	3.01335	3.05673	3.06955	2.87374	3.00338	2.83894	3.00623	3.03691	3.05157	3.08491	2.82971	2.80956	2.95537	2.83658	2.9616	3.10297
7894266	7.43985	6.79013	7.34963	7.22908	7.25817	7.49312	7.23154	7.17101	9.29474	7.09595	7.53626	7.16694	7.01355	7.2301	7.19244	7.19194
7894267	8.53443	8.84595	8.91955	8.6808	8.85248	8.39828	8.82288	8.1436	7.74254	9.26623	9.01642	9.22091	9.6281	9.17124	9.41171	8.91157
7894268	4.17856	3.86697	4.25199	4.08748	4.62652	4.95571	4.23031	4.62578	4.42935	4.53409	4.97035	4.65516	5.16323	4.67017	4.55697	5.03449
7894269	9.93467	10.0178	9.89339	10.0172	10.4539	9.87624	10.3755	9.9414	9.39803	10.0961	10.2474	10.2453	10.2597	10.2761	9.97874	9.97751
7894270	6.11142	5.33922	5.94345	5.23482	6.56027	6.85324	6.67988	5.27638	5.63277	6.35018	3.62296	6.72564	4.50761	5.53996	6.13933	6.39705
7894271	5.37627	3.64456	3.04109	3.12797	4.23298	3.99651	5.2206	5.76161	3.52171	6.45146	3.57512	5.43777	3.9246	3.96724	5.70896	3.26685
7894272	5.31518	5.29635	5.84034	5.96451	4.75716	6.02578	4.5883	4.72399	5.28676	4.72419	5.11087	5.57618	5.412	4.99657	5.13479	5.34791
7894273	7.87064	7.57384	7.66797	7.26492	7.05727	7.70218	7.01987	7.54333	6.32555	6.58715	7.23154	7.61582	7.48345	7.03335	6.67875	8.04718
7894274	4.55311	4.59003	5.13767	4.80517	3.95093	3.84402	4.46699	3.6639	4.04759	4.06627	3.75772	4.56971	4.84905	4.64505	4.85571	5.41647
7894275	3.56081	3.46294	3.3505	3.47364	3.22879	3.17942	3.27243	3.55666	3.24513	3.22489	3.46708	3.21353	3.48737	3.29754	3.37729	3.4353
7894276	5.78128	4.34629	4.03243	4.22634	3.58315	3.77907	4.579	4.54873	3.59407	4.30369	3.84186	3.8473	4.18878	3.68734	4.31435	4.77192
7894277	4.48435	4.74576	4.74184	4.89324	4.53104	4.56257	4.53137	4.95831	4.38823	4.51945	4.41652	4.68899	4.70987	4.62201	4.59321	4.47863
7894278	9.91084	9.59176	9.73043	10.133	10.3439	9.94828	9.62982	9.85817	9.55908	9.6784	9.91021	9.70934	9.42498	9.95002	9.58318	9.88157
7894279	7.7367	8.12774	6.87344	6.95367	7.94893	6.94246	7.57326	7.63338	6.41764	7.76363	5.82223	6.57869	6.56291	6.88977	6.83886	7.82232
7894280	6.8398	6.24701	6.30487	6.2565	7.20791	6.95396	6.76938	7.12196	6.72361	6.98888	6.95027	7.10772	6.87454	6.78496	7.12517	7.4896
7894281	4.50404	3.49358	4.12713	4.23141	4.27085	3.87935	4.90493	4.15352	5.00465	4.76829	4.00973	4.41176	4.85259	4.70156	3.98193	4.20009
7894282	9.65953	8.69698	9.58424	9.88378	9.57396	9.47989	9.48224	9.74974	8.79929	9.65022	9.89932	9.60841	9.81377	10.1536	9.97002	8.81923
7894283	6.9069	4.38775	5.03603	5.11966	5.94433	5.3543	5.43978	6.1231	5.31264	6.64071	4.13533	6.24261	4.21614	5.8145	6.46096	6.19509
7894284	9.17627	10.1909	10.602	10.1172	10.3705	10.3381	9.72708	9.88356	10.3708	10.2562	10.386	10.6335	10.0362	9.69707	9.83566	10.4361
7894285	5.15283	3.14364	3.31684	3.89033	3.71287	3.76748	4.69732	5.33005	3.74534	5.01201	3.27091	3.87063	3.33549	3.64185	3.86714	3.24752
7894286	4.0292	4.03272	3.95738	3.76572	4.10851	3.76612	3.10386	3.74265	4.44745	4.09384	3.52518	3.39751	3.99235	3.81632	3.54526	3.90018
7894287	3.61177	3.30688	3.06765	3.37824	3.22836	2.92025	4.06595	3.37333	4.16106	3.61701	3.38944	3.43653	3.14505	3.44353	3.54504	3.09449
7894288	7.45293	6.93895	7.04009	7.46587	8.00311	7.66601	7.36734	7.58022	6.93404	7.44952	7.80087	7.38873	6.8292	7.65868	7.53619	7.31493
7894289	9.64284	9.84891	9.78205	8.19819	9.53105	9.72869	10.4587	9.5736	9.64163	10.1648	9.86413	9.9714	10.2846	9.79813	10.276	9.96079
7894290	4.16163	5.03264	4.81534	5.09389	4.61179	4.78723	4.70369	4.47675	4.74415	4.68736	5.70337	5.12292	5.02914	4.92919	4.69487	4.78163
7894291	6.09079	6.02603	6.69849	7.16158	7.4063	6.80652	6.08302	6.04057	5.84619	6.18664	6.19512	6.62274	6.11759	6.27064	6.02793	5.8441
7894292	2.97772	5.18646	4.77809	4.49425	4.87609	4.52229	3.92847	5.54774	4.56472	3.87682	3.28903	5.13764	3.835	3.9246	3.41196	3.34943
7894293	9.06037	9.54536	8.62463	9.0545	8.76371	9.1094	9.016	10.0242	7.31281	8.7865	8.22349	8.9094	8.04353	8.94713	9.09976	9.34251
7894294	10.3357	10.0508	10.9491	10.7267	10.5602	10.5266	10.2847	10.4557	10.0993	11.0314	11.0576	11.0534	10.9095	10.7207	10.7189	10.5458
7894295	9.10262	8.89851	9.0813	8.82815	9.0491	9.18185	8.96634	9.35198	8.8296	8.73121	8.74335	8.84069	9.16688	9.14445	8.67983	8.71132
7894296	5.94641	5.90179	5.59029	5.52847	6.22643	6.8663	5.3037	5.66763	4.3941	7.05361	6.69386	6.98814	6.18876	5.95511	5.30257	7.65461
7894297	9.72893	9.67362	9.77819	9.19327	9.56609	7.49859	8.73848	9.53011	6.36442	9.82112	9.67249	7.74274	9.04695	10.149	9.72804	8.11051
7894298	6.97212	7.01695	7.10494	7.0054	7.30375	6.59739	5.85353	6.08493	6.22972	6.23339	6.82938	6.33849	6.80594	6.49204	6.54041	6.94508
7894299	7.11618	6.25873	6.19289	6.80113	7.36244	6.71742	7.16487	7.0774	6.53181	7.52583	6.81206	7.2772	6.37255	7.11976	6.92012	6.50636
7894300	3.68047	3.3235	3.10597	3.10483	3.11316	3.14934	3.6223	3.65057	2.84506	3.45373	2.88363	3.13064	2.93577	3.22263	3.31326	3.18486
7894301	3.88143	5.16113	5.34333	5.83006	5.08967	4.39257	3.98756	3.79412	5.56307	4.43367	4.8398	5.18463	5.42772	4.82391	4.59772	5.31283
7894302	4.61977	4.63356	4.75504	4.80089	4.89393	4.56378	5.45635	4.51519	4.04833	5.09086	4.29357	4.71167	5.03607	5.04739	4.75469	4.4033
7894303	6.03921	6.42175	6.32903	6.40765	6.84036	6.13569	6.27481	6.15828	7.46013	6.57698	5.86349	6.16295	6.27966	5.77872	6.34757	6.77484
7894304	9.41435	10.4456	10.719	10.1453	9.76495	9.78727	10.2046	9.19197	10.2177	9.69042	9.65775	10.8403	10.6267	10.372	9.79158	10.137
7894305	6.87363	6.64925	6.92401	7.0848	6.76209	7.03709	6.73054	7.1914	6.16441	7.21809	7.22603	6.89618	6.76073	6.89268	6.93589	7.45449
7894306	7.07721	7.16349	7.28702	5.95882	6.8105	6.94818	7.84586	7.2657	7.13421	7.56594	7.79425	7.08942	7.82017	7.56862	7.3693	7.17188
7894307	10.7	10.8351	11.0442	11.0759	11.0632	10.8862	10.8314	10.6655	10.8345	11.1309	11.1613	11.216	10.7029	10.9576	11.0044	11.1388
7894308	8.79711	7.30935	7.87436	8.52087	9.02323	8.9602	8.55095	8.51079	8.3014	8.43762	8.3069	8.68164	7.25296	8.45972	8.06339	7.87463
7894309	8.67226	6.57766	7.55238	8.71245	9.59877	9.04947	8.33909	8.47304	7.67515	8.6815	8.25448	8.77158	6.97085	8.49494	8.51496	8.08492
7894310	6.98885	3.87728	4.03165	5.32697	6.76133	6.27261	6.45506	5.66763	3.8177	6.61878	5.85981	5.78785	4.06453	5.92913	6.07517	4.90634
7894311	3.47467	3.93347	4.16759	4.04829	4.08153	3.40461	4.47918	3.71431	3.4928	4.4418	3.65898	3.57888	3.95816	4.15968	3.59619	4.55633
7894312	5.6507	5.99236	5.6569	5.79356	6.3869	5.76705	5.77274	5.17313	6.41812	6.03206	6.42821	5.48603	5.82917	6.08175	5.67229	5.84941
7894313	5.16457	3.15081	3.51608	4.03128	5.24512	5.23922	4.51467	4.62288	3.6868	5.78196	3.47097	5.12922	3.50884	4.59418	5.34205	4.43015
7894314	3.7115	3.23841	3.43948	3.53016	3.73076	3.40614	4.17655	5.46181	3.86621	3.80357	2.63057	3.93007	3.64202	3.85359	4.47169	3.64971
7894315	10.2794	10.6491	10.2773	10.1312	10.2423	10.2949	9.57878	10.2822	10.2187	9.66361	9.35733	10.3269	9.6091	9.32631	10.0063	10.3592
7894316	10.0625	10.6183	10.6652	10.3408	10.2357	10.0954	10.5342	10.0221	10.0022	10.3698	9.54165	9.99457	10.6218	10.4092	10.2088	10.3874
7894317	2.60299	2.61503	2.85687	2.62205	2.90035	2.61357	2.56313	2.9368	2.8835	2.83149	2.67884	2.69313	2.56485	2.8232	2.70297	2.71395
7894318	5.7537	6.12801	4.76257	5.07393	5.51188	5.68854	5.05445	5.56772	4.93438	5.17948	4.29634	4.99152	4.77029	5.07237	5.27508	4.73182
7894319	2.78277	3.089	3.32005	2.89605	3.0795	2.93614	3.03184	2.91725	2.98572	3.27199	2.93904	2.9756	2.94691	2.97311	3.24769	2.91837
7894320	10.6636	9.52932	9.56247	10.3531	11.0375	10.596	10.299	10.4827	9.48372	10.2823	10.5416	10.4663	9.16233	10.4515	10.5121	10.4784
7894321	7.51799	8.0499	7.45077	7.12362	7.18179	6.63789	7.87629	7.16048	7.4254	7.51161	5.54463	8.3938	8.19271	8.52589	6.61032	8.05173
7894322	3.72597	3.83333	4.65254	4.16269	3.92169	3.76239	4.43824	4.23337	3.85516	4.31363	3.92031	4.08407	3.85131	3.865	4.1229	4.14925
7894323	2.78402	2.88233	2.84617	2.86735	2.93508	2.72495	3.1692	2.90743	4.30989	2.96471	2.79146	3.19448	2.90873	2.84275	2.87224	3.09574
7894324	10.5058	10.2535	10.2403	9.57551	9.90533	9.64091	10.2259	10.2492	9.5781	10.8461	10.4445	10.7241	10.9375	9.92622	10.6174	10.3993
7894325	4.38439	4.17019	4.88664	4.41331	3.93757	4.4023	4.09257	4.35145	5.14418	4.56491	3.35865	5.37993	4.25898	4.17074	4.80246	5.39086
7894326	3.0159	2.93831	2.83173	2.77137	3.09227	2.76449	2.86375	2.84657	2.77796	2.99135	2.91106	2.81855	3.02525	2.9183	2.83818	2.78862
7894327	2.93036	2.70148	2.8698	2.97636	2.90801	2.79853	2.84651	2.89182	3.03369	3.04427	2.68132	2.72706	3.00112	3.01978	3.12733	2.92731
7894328	7.28374	7.71245	7.35279	7.8065	8.37759	7.35267	8.29755	7.76318	9.10241	8.48542	6.92236	7.36783	7.32314	7.44161	8.23629	8.26383
7894329	5.28427	5.7985	4.66369	4.94094	5.18795	4.67973	5.9392	5.83169	4.31782	5.35845	3.86445	4.42565	6.06108	5.79307	4.91207	4.54019
7894330	4.82635	3.30509	3.87012	3.74086	4.16285	3.57251	3.58792	4.19957	5.27145	4.21589	3.42649	3.77033	3.52142	4.01033	3.52032	3.73282
7894331	8.24109	8.15718	7.86078	8.11323	7.70037	7.89777	7.87588	8.46821	7.87243	8.54994	8.57938	8.53004	8.44136	8.23867	8.53065	8.36544
7894332	5.43054	4.48984	5.49398	4.94039	6.32347	5.45051	5.45229	4.70868	5.19413	5.509	5.59528	5.62379	3.88738	5.68033	5.83494	5.05579
7894333	3.08162	3.2464	3.12611	2.97901	3.19902	3.22117	3.11034	2.94957	2.98243	3.283	5.02679	3.08801	3.08329	3.21353	3.1232	3.55153
7894334	3.65792	3.33257	3.39589	3.42683	3.42326	3.31758	3.84435	4.00052	3.51939	3.65793	3.35065	3.52633	3.53417	3.69665	4.41147	3.89949
7894335	7.28	6.80446	7.21475	6.68727	6.08591	7.33639	6.40806	7.07248	6.71333	6.47014	4.82181	7.53641	6.74866	6.34971	7.15871	7.08784
7894336	8.40242	8.04222	8.41319	8.04012	7.6797	8.15001	7.93983	7.93758	8.11781	7.82644	7.71162	8.35726	8.32386	8.34591	8.27193	7.7922
7894337	5.38319	5.85886	5.35319	5.32743	5.26691	3.94512	4.86994	4.40364	4.13503	5.42939	4.1738	4.96865	5.4379	4.57764	4.97803	5.41807
7894338	3.74954	3.44983	3.57374	3.67206	3.52809	3.45227	3.10899	3.69852	3.56986	3.43748	2.93387	3.44052	3.56902	4.10633	3.5039	3.30125
7894339	3.12558	2.75363	2.90522	2.68516	2.8099	3.16498	2.89067	3.67723	2.85121	2.75401	2.73358	2.72436	2.78117	2.84522	3.06557	2.74187
7894340	2.8734	2.69974	2.70954	2.85023	2.94867	2.86667	2.65365	2.72549	2.59979	2.48097	2.64197	2.58769	2.91219	2.65842	2.76363	2.54379
7894341	10.7919	11.0308	10.6381	10.4616	11.0694	10.4702	10.9621	10.0162	9.94385	10.6793	9.83836	10.3253	10.3147	10.3957	10.384	10.1439
7894342	6.33921	5.70884	6.40334	6.10798	6.53181	6.94185	7.29985	5.81607	6.8429	6.5197	4.9559	7.72852	5.3192	6.28166	6.63559	6.94048
7894343	4.28243	3.86509	4.35684	4.30678	4.51972	4.25171	4.44181	4.85212	3.61733	4.69127	4.96049	4.83174	4.1593	4.04672	4.34276	4.65039
7894344	3.58132	2.957	3.37829	3.01603	3.38355	3.72655	3.98432	3.30412	3.86984	3.66781	3.00978	4.34713	3.37403	4.25989	3.42831	3.47952
7894345	5.58905	5.28299	5.24528	5.53473	3.91077	5.01042	6.24828	5.95077	3.52171	5.47492	5.85981	5.02892	4.50831	6.18765	5.67616	5.3204
7894346	8.06903	5.56153	6.93564	7.47517	8.12993	7.86996	7.51563	7.85197	6.39812	8.27929	6.24406	7.56582	6.43623	7.62874	7.66492	7.89963
7894347	4.68926	4.55985	4.41309	3.65957	3.56398	4.13129	4.45304	3.669	3.64687	4.04665	5.01273	4.33912	4.4196	3.94704	4.10641	4.10625
7894349	2.98867	2.70691	2.61483	2.66684	2.75671	2.66531	3.11152	2.86256	2.91896	3.09035	2.60647	2.95371	2.72556	2.71449	2.72505	2.81848
7894350	6.70151	7.26726	6.14529	6.24959	6.67242	6.10396	6.7183	6.42931	5.45609	6.76641	5.82181	5.66723	7.1179	6.88127	5.67413	6.2992
7894351	9.18327	8.39692	8.17863	8.66651	9.59677	8.78806	8.63909	9.75683	7.45567	8.71537	7.07086	8.5282	8.49417	8.24516	8.49627	9.14347
7894352	5.78394	4.73221	5.59757	5.92636	6.16556	5.60409	5.75817	4.89891	5.07899	5.70773	4.91306	5.42594	4.73256	5.17406	5.50108	5.21282
7894353	4.25655	4.03639	3.71609	4.31205	4.14054	4.2541	4.13702	4.08393	4.40461	4.18789	4.16774	4.28909	3.77285	3.97462	4.69859	4.38214
7894354	4.90066	3.7418	4.31525	4.60996	4.78314	4.67174	5.16172	4.56077	5.56659	6.33097	4.65175	5.42567	5.05045	5.19035	3.92924	4.63754
7894355	6.2728	5.10313	5.98308	5.22581	5.05999	5.97486	5.88186	5.38639	6.41446	6.22879	5.66533	6.12028	6.76178	5.85074	5.45648	5.68612
7894356	6.94292	6.94196	6.79314	7.00478	6.9033	7.03032	6.37128	6.678	5.3533	6.22638	6.87633	6.90169	5.7744	6.46894	6.42267	7.02437
7894357	6.07065	5.74811	5.07	5.43773	5.75799	4.87506	6.24375	5.68103	3.83161	6.15472	4.17448	5.11125	5.2191	5.90212	5.7038	4.78413
7894358	4.44359	4.18166	4.98359	4.39037	4.23775	4.30328	4.92715	4.41414	5.23712	4.28338	4.03262	4.26927	4.3797	4.55951	4.2214	4.1719
7894359	4.92306	3.31097	4.74012	4.78984	4.89676	3.94813	6.28942	4.1867	4.19156	4.69011	3.97343	5.34465	4.81273	5.49971	4.3087	4.21002
7894360	5.43564	4.13687	4.52624	4.76546	5.48755	5.52475	5.8903	6.06309	5.19711	6.07792	4.61212	5.83309	4.96308	5.12261	4.56505	5.83913
7894361	6.23664	4.51028	5.22201	5.2175	5.28047	5.32903	6.20418	5.80689	5.70317	5.32511	5.13081	6.06291	5.87443	5.56905	5.97373	4.79252
7894362	2.99512	3.37361	3.34968	3.50223	3.63184	3.6813	4.15058	2.95673	4.90821	3.81418	3.46897	3.99034	3.71029	3.47142	3.40874	3.53357
7894363	9.36418	9.60566	9.4944	9.66966	10.1851	9.38225	9.82814	9.46027	8.83001	9.77855	10.2127	9.87236	9.93036	9.98721	9.56578	9.96266
7894364	4.14699	4.16882	3.8016	3.50128	4.02566	3.69432	4.14496	4.56057	3.98198	4.39942	3.92474	4.1765	3.89651	3.95292	3.84851	3.90181
7894365	3.05589	3.14719	3.16577	2.90022	3.21357	3.00723	2.99131	2.86874	2.98041	3.22978	2.88098	3.12122	2.99129	2.94914	2.86901	3.15786
7894366	11.0214	10.4809	10.9728	10.8168	11.0635	10.8481	10.9327	11.0226	10.6231	11.304	11.2123	11.1292	11.2174	11.1377	11.1438	11.0613
7894367	8.20265	8.10243	8.18094	8.30751	8.53349	8.05745	7.74082	7.97507	7.30756	8.33399	8.05268	7.93858	7.98923	8.13788	8.00098	7.91339
7894368	4.10349	3.82563	3.84711	4.03033	3.94036	4.41075	4.88255	3.42342	4.36989	4.56064	3.71245	4.21538	4.61974	4.4769	3.98611	4.31856
7894369	8.41252	8.17278	8.27321	8.65146	8.90082	8.71971	7.60341	8.22725	7.79512	8.11721	8.81292	8.00651	8.15184	8.33804	8.08422	8.34391
7894370	4.44631	4.15884	4.43355	4.68517	5.07822	4.71722	4.51107	4.81516	4.53298	4.24471	4.85729	5.32438	3.96225	4.60253	4.77601	4.44155
7894371	6.17501	6.02148	6.39778	6.11783	6.28313	6.40914	6.42583	6.37719	7.90131	6.44688	6.72167	6.72429	6.20836	6.86262	6.47987	6.51561
7894372	11.154	10.63	11.095	10.534	10.7286	11.1184	11.203	11.1494	11.2128	11.1114	11.1551	11.1044	11.0848	11.4008	11.2558	10.7287
7894373	8.05526	8.41255	6.78886	6.66353	7.34153	6.80236	7.91998	8.06679	6.54382	7.04253	6.43807	7.01599	8.07054	7.46554	7.83934	7.12884
7894374	9.62779	9.07306	9.55961	9.29556	9.12517	9.18171	9.57145	9.70101	9.66285	9.99738	9.80276	9.27979	9.76314	9.84886	9.72057	9.42161
7894375	8.90216	9.32951	9.30661	9.42047	9.01361	9.31903	9.1595	9.17633	8.81922	9.28849	8.94791	9.2644	9.11467	9.2563	9.35743	9.06588
7894376	7.60803	8.52504	8.79235	7.69909	8.106	7.85458	8.46292	6.90741	7.8491	8.92714	8.96065	8.904	8.8744	8.30858	8.20253	8.89183
7894377	3.07509	3.49272	3.09766	3.29664	3.7941	3.34102	4.03909	4.11981	2.68334	4.08142	2.88168	3.72374	3.30237	3.02168	3.21734	3.25471
7894378	6.54702	4.42711	5.41723	4.89332	6.44119	6.39716	6.37093	6.0028	5.23718	6.45489	3.75222	6.73212	4.34635	5.3191	5.59336	6.85323
7894379	9.34729	9.781	9.74644	9.42181	9.30822	9.54757	9.65546	9.4781	9.67563	10.2053	9.17346	9.7875	9.52511	9.57675	9.76808	9.69413
7894380	10.4696	10.1641	9.72818	10.2345	10.2145	9.96047	9.96818	10.3176	8.75221	10.082	10.362	9.49018	10.0729	10.2441	10.5069	9.93466
7894381	3.60163	4.22942	3.59167	3.72593	4.09712	3.53096	3.28747	3.62049	3.24647	4.2299	3.78972	3.90563	3.99446	3.95703	3.46544	3.64685
7894382	9.42338	8.55102	8.49953	9.27449	9.8265	9.57771	9.13419	9.29274	8.40845	9.42712	9.62312	9.408	8.12741	9.34719	9.10752	9.21567
7894383	4.50745	3.8285	4.13439	4.25697	5.81255	5.22861	5.70182	4.26788	3.63889	5.29604	4.55618	4.84142	3.65465	4.29671	4.92718	4.27137
7894384	7.2715	6.35585	6.53512	6.51564	6.06353	5.92693	6.35144	6.08469	6.65952	6.81302	6.65338	6.93007	6.90876	6.9394	6.06185	6.7348
7894385	7.67919	7.94706	7.32344	7.13114	7.82	7.55421	8.18572	8.58373	6.53258	9.21254	7.24561	7.5224	8.35131	7.82969	7.4349	7.99307
7894386	7.36325	7.09367	7.30105	6.5752	7.78375	7.172	7.0318	7.85902	7.60891	8.05074	6.65712	7.61947	8.28291	7.4106	6.92794	7.41203
7894387	4.0847	3.093	4.33539	3.46582	4.93688	4.18845	5.13677	3.58726	3.59321	5.56286	3.47816	5.71495	4.73744	4.76548	3.90572	5.59345
7894388	5.39062	5.74376	5.79148	6.25251	5.83045	5.79175	6.30898	5.56481	7.71436	5.88959	6.14958	5.96369	5.81135	6.13354	5.97481	5.96465
7894389	8.38169	7.99829	8.80405	8.74102	7.53635	8.11182	8.08134	8.17167	8.3132	8.238	8.84873	8.43165	9.21638	9.01819	8.38404	8.05344
7894390	4.99015	3.59053	3.80458	3.65835	3.42274	3.68139	4.13801	4.1136	3.59681	3.34889	2.84702	3.45643	4.22182	4.56461	4.13054	4.0908
7894391	7.35162	6.36783	5.87498	5.65048	5.98483	6.31045	6.06326	6.5993	4.65859	5.76899	4.57854	5.70425	6.27831	5.36902	5.49509	7.33898
7894392	11.3877	9.2931	9.9556	11.0354	11.7139	11.2004	11.1801	11.2584	10.3893	11.3457	10.8535	11.0057	9.2749	11.2566	11.1798	10.3027
7894393	3.09756	3.3633	3.38152	3.02771	2.9481	2.8278	3.29296	2.82984	2.96121	2.95841	2.9204	3.16461	2.9996	3.0967	3.42767	3.52402
7894394	4.4617	4.18013	4.36407	4.29126	4.26693	4.29627	4.62323	4.23478	4.24792	4.34166	3.88143	4.22518	4.24319	4.33071	4.35715	4.32228
7894395	10.0297	10.4015	10.4858	10.0914	9.59475	9.78143	10.3778	9.77446	10.0026	9.43562	9.26828	10.5544	10.2959	10.2322	9.60302	10.0465
7894396	5.31802	5.36803	5.1899	4.94912	5.27237	5.258	5.95044	6.27141	4.10593	5.58646	4.64501	5.0824	4.68097	4.78573	5.70711	5.63027
7894397	2.91227	2.82817	2.88884	2.94057	2.96486	2.9533	3.25888	3.15195	2.87556	3.12743	2.79914	2.92688	2.97359	2.83451	2.99607	2.91203
7894398	6.36751	5.66092	6.11665	5.08761	5.63518	5.94308	6.58853	6.45218	6.05978	5.81245	4.84762	6.15673	5.73271	5.98705	6.20949	7.10677
7894399	7.29492	5.6663	7.25546	7.58281	8.60754	8.32253	7.59024	5.54311	7.54546	8.0801	5.18515	8.68738	6.9031	7.24141	7.45365	8.1205
7894400	8.05631	6.02291	6.78884	6.77767	6.62163	7.26597	7.25583	6.87945	6.92172	6.87023	5.94412	7.5722	6.12686	7.23976	7.0233	7.37866
7894401	4.03507	3.19976	3.33869	3.50715	3.84016	3.66271	4.11652	3.81637	3.32467	3.86868	3.63761	3.49488	3.05298	3.50592	3.67583	3.37534
7894402	9.9886	9.99071	10.5119	10.3214	10.3391	10.0654	10.4376	10.4328	9.90788	10.2252	10.3353	10.2663	10.4276	10.4336	10.1932	10.0924
7894403	4.66021	5.45331	5.77079	4.92128	5.00888	4.89515	5.06537	4.94462	5.15899	5.70521	4.71088	5.18844	4.94836	5.29961	5.90109	5.8614
7894404	9.94039	9.99397	9.98954	10.0975	9.77413	9.90054	9.74141	10.1668	8.99335	9.9585	9.39986	10.025	9.90472	9.42021	10.0518	10.1434
7894405	5.8254	6.50356	7.47898	6.82709	7.86015	5.66161	6.43891	5.61155	5.34939	6.60967	3.74607	6.60903	6.40281	5.97375	5.52253	6.48985
7894406	11.0371	10.874	10.7386	11.0548	11.2236	10.8472	10.627	10.7505	11.0334	10.7223	10.8718	10.5613	10.6245	10.7264	10.7439	11.1351
7894407	3.91339	3.96626	3.7916	3.45523	3.20519	3.67726	3.9167	3.82338	3.81999	4.37582	4.39354	3.84507	3.80473	4.06344	3.49251	3.31727
7894408	7.36964	5.20239	6.84154	7.39733	7.94597	6.63597	6.6591	6.72274	5.83077	7.55814	4.97646	7.70794	6.53321	7.02724	6.90865	7.42346
7894409	6.50275	4.34371	5.32117	5.82535	6.486	5.41251	7.27916	5.71382	5.21221	7.21002	6.37442	6.23937	6.18624	6.60272	6.35859	5.55386
7894410	6.07501	4.04294	4.45873	5.08198	5.91817	5.48411	5.18612	5.03159	4.6675	5.64686	4.52206	5.81916	4.15404	5.12035	5.58487	5.37076
7894411	9.68266	10.5861	10.6738	10.4231	10.1085	10.123	9.93103	9.40887	9.21657	10.4143	9.59394	10.3507	10.3738	10.2304	9.35217	9.82574
7894412	7.08999	7.22612	7.3403	7.6928	7.41139	7.39093	7.04415	6.75307	7.94968	7.03017	7.16099	7.07833	7.50111	7.06253	6.70684	6.4885
7894413	10.7731	9.91237	10.8295	10.6776	9.99156	10.4438	10.443	10.3513	10.6356	10.4832	9.98222	10.6778	10.6366	10.7549	10.6809	10.2593
7894414	3.64124	3.3076	3.32831	3.40276	3.40782	3.26823	3.39875	3.39896	3.64231	3.3429	3.18076	3.52452	3.25361	3.23321	3.75806	3.29992
7894415	5.74339	4.67527	6.11064	5.54557	5.00604	6.19491	5.16603	6.19553	5.70439	4.98544	4.36056	6.3448	5.29348	5.50248	5.67664	6.64829
7894416	9.77301	9.61244	10.0888	9.73102	8.88331	9.65843	9.36132	9.46835	9.37824	9.38504	8.84626	9.98985	10.2824	9.29716	9.32104	9.90075
7894417	4.93033	4.94562	4.86511	4.97875	4.74785	5.41178	5.27782	3.98101	5.08369	4.22023	4.88772	5.1303	4.51096	5.01057	4.54407	5.69314
7894418	8.16105	8.29389	8.06471	8.10819	8.18227	8.15469	7.07242	7.66937	7.83621	7.48685	7.41154	7.21967	7.64571	8.00102	8.12304	8.03658
7894419	4.52229	4.08078	4.1992	4.17007	5.43777	4.04747	4.68272	6.04837	4.02001	4.48743	3.57512	5.80183	4.77719	4.18478	5.34401	5.40531
7894420	6.37909	5.81758	5.76068	5.1802	5.99305	5.40502	6.30739	5.88975	4.76147	6.45888	5.35301	5.53549	5.23496	6.00768	6.51159	5.3649
7894421	10.4443	10.8706	10.5516	10.6983	10.6107	10.3504	10.6573	10.8034	10.3085	10.7138	10.1686	10.5003	10.2412	10.5348	10.757	10.5582
7894422	6.08389	6.86097	6.47437	5.721	6.2176	6.25457	7.29002	6.8821	5.36339	7.01922	5.88933	6.2024	6.43963	6.41703	6.83445	7.02888
7894423	4.20771	4.09774	4.8078	4.19048	4.31057	4.10521	5.02951	4.18979	4.15313	5.01689	4.17322	4.23966	4.29921	4.61611	4.88233	4.00019
7894425	3.93924	3.31269	3.27566	3.70741	3.37888	3.59591	3.61647	4.05202	3.44852	3.55507	3.63287	3.57391	3.51583	3.825	3.91974	3.47516
7894426	4.47975	3.6401	4.03578	3.68021	4.14056	3.76157	4.8179	4.1556	6.86495	4.15912	4.22851	4.09889	4.04597	4.38557	4.76524	4.12747
7894427	3.97525	3.8713	3.7787	3.88515	3.81179	4.19661	3.96681	3.89583	3.96529	3.76562	3.14778	3.39962	3.68579	3.96223	4.07314	3.52479
7894428	8.05544	7.69555	7.82201	7.87134	7.14686	8.27953	8.12892	7.71772	7.43792	7.82406	8.61755	7.94779	7.75695	7.84749	8.16077	7.98732
7894429	10.2469	10.0603	10.5421	10.2724	10.4644	10.2824	10.2627	9.96045	10.0633	10.4349	10.3444	10.6325	10.237	10.2705	10.5581	10.4878
7894430	5.79898	5.91864	5.99362	5.8415	6.46869	6.31784	6.08026	6.74522	6.57556	6.65991	5.52548	6.64145	6.53518	6.49808	6.33708	6.54863
7894431	9.55679	10.4033	10.1449	9.9523	10.0545	9.68513	10.169	9.56708	9.95986	10.5478	10.0835	9.8203	10.1976	10.1753	10.1606	9.7076
7894432	8.21022	6.92832	7.1804	8.07134	8.89963	8.20346	7.47529	8.05091	7.37552	8.12178	7.63935	8.19057	6.9375	8.22721	7.81606	7.63739
7894433	9.66957	10.0999	10.4429	10.0122	10.0536	10.035	10.1095	9.9922	9.82583	9.46947	9.3922	10.0876	10.2212	9.9972	9.87244	9.87869
7894434	8.55062	7.92886	8.17967	8.41526	8.60543	8.09275	8.27496	8.42717	7.24849	8.32024	7.20432	8.11459	7.71619	8.1448	8.14285	8.05604
7894435	7.36335	6.9794	6.88474	7.15811	7.25044	6.88452	7.21258	7.23492	8.31966	7.37376	6.89492	7.35583	7.46732	7.70344	7.354	7.31849
7894436	6.97779	7.02293	7.88048	7.73255	7.45479	7.1755	7.56981	7.35731	6.75347	7.87607	7.91328	7.96068	7.68619	7.86135	7.6816	7.42254
7894437	6.4662	6.21499	7.05934	7.37368	7.92011	7.50064	6.69198	6.23274	7.89017	7.05741	6.54719	7.34802	7.48275	7.32382	6.80294	7.18892
7894438	7.75974	7.72881	7.1223	7.18929	7.7296	6.61069	8.09507	7.48996	5.76581	7.71277	7.56302	6.81738	8.06421	8.05049	7.05494	7.34899
7894439	10.7596	10.2076	10.4692	10.7051	10.4451	10.7939	10.1263	11.0069	9.6531	10.6161	10.4232	10.3658	10.5114	10.4904	10.5643	10.4568
7894440	7.17729	6.68909	6.06452	6.54649	7.34945	7.48956	7.77755	7.28606	5.48548	7.60293	5.05294	6.29117	6.3074	6.52816	6.88527	7.70608
7894441	4.20191	3.39311	3.60517	3.89866	4.19345	4.2331	4.16338	3.67085	2.78426	4.6062	4.87831	4.66593	3.34211	3.77594	3.78061	5.6833
7894442	6.86837	6.69831	5.92251	6.37022	6.36941	5.96747	7.18902	7.02458	6.18532	7.0005	5.80843	6.1422	6.03673	6.24626	6.63975	6.86382
7894443	7.36532	7.13189	7.14154	6.71057	7.07466	6.99943	8.42413	6.95739	6.36063	6.87771	6.70403	7.39409	6.82018	7.25364	7.1171	7.13401
7894444	8.26681	7.7967	7.42776	8.49284	9.15777	8.61662	8.33602	8.33657	7.59883	8.42533	8.47841	8.48965	6.89119	8.00857	8.15102	8.30834
7894445	4.39105	3.73757	4.28171	4.18631	4.71271	3.86906	4.47727	3.79525	4.74104	4.661	4.53678	4.42349	4.2237	4.06907	3.97129	3.67741
7894446	5.19043	5.55132	5.92217	5.76378	6.08776	6.01879	6.40012	5.55094	5.94684	5.64125	6.68921	6.02618	6.11179	5.8841	5.93631	5.66123
7894447	8.06114	6.32902	6.85173	7.81621	8.43551	7.95641	8.02835	7.83939	7.54513	9.03908	7.17768	8.2215	7.32578	8.03716	8.06491	7.98506
7894448	2.91929	2.82354	3.25712	2.92143	2.74666	2.91984	3.20199	2.91754	2.681	3.00924	2.95734	3.00029	2.84081	2.74219	3.00995	3.04529
7894449	8.42197	8.24769	7.79486	8.29237	8.18299	7.82293	8.2727	8.85824	7.15052	8.12029	7.84366	7.9208	8.27706	8.30637	8.25927	7.9672
7894450	3.9442	4.09951	3.37119	3.89704	4.07723	3.91123	3.25519	3.82481	3.2017	4.26187	3.61432	3.71173	4.04393	3.23793	3.52061	3.82824
7894451	7.57508	6.96494	6.96631	7.07349	6.72522	6.82331	7.09581	7.56607	4.82172	7.86856	6.8517	7.13336	6.75892	7.5168	7.29905	7.84656
7894452	4.8846	4.07379	4.52435	4.40129	4.10254	4.70806	5.353	3.8008	8.78972	4.82431	3.37331	4.76355	4.78603	4.48622	4.62468	4.69284
7894453	5.88659	5.32176	4.37288	5.81318	5.53124	5.06029	4.91131	5.36603	3.87473	5.65693	6.35245	5.68796	5.33139	6.13179	5.42934	5.52031
7894454	4.222	4.77827	4.52539	4.59269	5.67305	3.80237	4.3286	3.72056	3.05008	4.78853	4.6312	4.30387	3.67829	4.25331	3.3401	4.08682
7894455	5.07204	3.13943	4.05709	4.01218	3.89702	4.02898	4.36848	4.30339	8.76721	4.65895	3.81288	4.43189	4.69003	4.48622	4.15564	4.97364
7894456	5.64713	5.41966	5.88304	5.83227	5.71969	5.40352	5.63468	5.58345	5.03054	5.30376	5.2477	5.16397	5.29127	5.53541	5.85566	5.33774
7894457	5.96587	5.94264	6.0819	5.94438	5.65958	5.24769	5.90288	5.83727	5.20351	5.70449	5.21363	6.02688	5.78175	5.86813	6.22127	5.56289
7894458	4.11549	3.26838	3.38285	3.05472	3.24401	3.72882	3.9988	4.06332	3.15751	3.13195	3.52782	3.8493	3.64756	3.62635	3.64971	4.24951
7894459	9.35096	9.12577	9.51913	8.58505	8.82857	9.39269	8.98773	9.19838	9.10622	9.35288	9.58981	9.38799	9.48661	9.45238	9.67952	8.72961
7894460	11.4552	9.72096	10.4275	11.4629	11.9682	11.5168	11.4419	11.4299	10.7718	11.2834	11.4027	11.238	9.86228	11.3273	11.4298	10.8188
7894461	4.65493	5.12664	4.84651	4.68416	5.33592	4.90882	5.78006	5.68586	4.38725	5.823	3.76572	5.08534	4.14579	4.74362	5.53292	4.98937
7894462	3.93091	5.34867	5.19946	5.02396	5.99999	5.47236	6.3345	4.93503	5.10961	6.53946	5.2155	5.86984	5.04711	4.66507	6.05286	5.78497
7894463	3.63733	3.08772	3.47406	3.35804	3.46713	3.48205	3.6757	3.60726	3.88944	3.88773	3.40797	3.47593	3.38942	3.52872	3.81338	3.41382
7894464	8.65335	8.13866	8.26296	8.95663	9.321	8.91062	8.27503	8.09459	8.03122	8.34903	8.40845	8.89232	7.53397	8.54284	8.08558	8.70586
7894465	4.54086	4.34385	4.03478	4.61613	4.53188	4.17753	4.11883	4.34093	4.78843	4.87483	3.98484	4.74856	4.29872	4.88381	4.40599	4.9304
7894466	6.35132	5.76144	5.97515	5.89391	6.19513	6.13196	5.82323	6.00881	5.57377	5.77613	6.09481	6.12258	5.51306	6.2524	6.80868	6.45605
7894467	7.70825	7.25108	7.34785	7.14681	7.90672	7.40617	7.17507	6.51084	7.37639	7.53368	6.06675	7.43033	7.69577	7.35167	7.58222	7.38641
7894468	5.87331	5.16507	5.17838	5.09806	5.55761	5.18892	4.97951	5.51172	5.051	5.30264	4.86044	5.12226	5.23675	5.23561	5.26256	5.97836
7894469	10.6159	11.0854	11.3437	11.1158	11.2388	10.6866	11.6416	11.157	10.3865	11.9919	11.9421	11.5541	11.795	11.6257	10.4988	11.1039
7894470	8.97736	9.624	8.97313	9.00503	9.2863	8.92708	9.14384	8.69629	8.41485	9.0653	9.19032	8.66295	9.67474	9.44189	8.52796	8.84966
7894471	11.4782	11.6944	12.1079	11.785	11.6523	12.0228	11.7588	11.6106	11.6308	12.1869	11.9683	12.13	11.9488	11.4139	11.8695	12.02
7894472	3.93743	3.80212	3.65337	3.61811	3.99158	3.6503	4.60236	3.77148	3.86539	3.75944	4.24715	4.15188	3.74989	3.86624	3.66086	4.65838
7894473	3.10434	2.95143	3.2025	3.02029	3.00588	3.00816	2.95874	3.05982	3.35345	3.16677	3.02466	3.36767	3.08697	3.19347	3.31075	3.45112
7894474	7.57452	7.46988	7.69475	7.5995	7.75165	7.13553	6.73945	6.86842	7.41498	7.17245	7.15953	7.10897	6.92151	7.05521	6.76848	7.27061
7894475	8.04837	7.62772	7.93134	8.36265	9.02601	8.24098	7.6529	7.8731	7.28447	8.89496	7.32333	8.41465	7.33787	8.24304	8.10069	7.77974
7894476	6.18062	4.84591	5.35342	6.18196	6.24849	6.53708	5.95383	6.27394	6.46973	6.56632	7.0682	6.88056	5.4097	6.44046	6.16221	6.26889
7894477	3.0108	2.75459	2.75749	2.7217	2.91119	2.94486	3.16283	3.09807	2.67141	3.04292	2.9232	2.76336	2.75578	2.83825	2.87135	2.83827
7894478	6.66294	7.20548	6.91104	7.11063	7.14122	7.01067	6.54731	6.70626	6.61726	6.79196	7.07094	7.01121	6.9135	6.75794	6.88952	6.86442
7894479	9.84904	10.6812	10.0738	9.8872	9.62035	10.1551	9.89142	10.0176	9.72717	9.90857	9.78407	10.2112	10.3039	9.82338	9.90561	9.80694
7894480	5.9811	5.88637	6.09287	6.3765	5.99188	6.41597	5.84523	6.16242	6.27617	6.04131	7.11677	6.31268	6.19907	6.31077	5.79924	6.40721
7894481	11.3231	9.42059	9.82878	10.8001	11.4587	11.0736	10.937	11.2454	10.0138	11.2996	10.9904	10.6863	9.83217	11.1582	10.9741	10.1924
7894482	5.42501	4.84435	5.08056	4.2936	4.89688	4.29868	4.72548	5.19215	4.32611	5.3568	4.22782	4.5159	4.25905	4.48364	5.08958	4.92193
7894483	4.35588	2.91087	3.58101	3.32118	4.05698	3.94803	3.59771	4.18321	2.92271	4.8143	3.5634	3.749	3.8328	3.83434	3.8143	3.94213
7894484	7.12924	6.74946	6.76988	6.58375	6.46018	6.6712	6.90067	6.5729	6.06206	6.99837	5.94281	6.44496	7.18462	6.79481	6.50408	7.14273
7894485	9.71728	10.4136	10.4702	10.092	10.3332	9.91665	10.3391	10.1642	9.67424	10.7331	10.7248	10.7451	10.6645	10.2505	10.4187	10.5006
7894486	5.10614	4.72302	4.58015	4.21018	5.40014	5.06489	5.0554	5.30702	5.96481	5.15098	3.75452	5.01792	4.65733	5.31825	5.80285	5.16219
7894487	2.79125	2.75335	2.74465	2.79627	2.73886	2.69027	3.09725	2.95075	2.80719	2.69378	2.70046	2.71213	2.79496	2.75696	2.76959	2.57499
7894488	3.93801	3.61978	4.27853	3.91697	4.20498	3.75449	4.21687	4.37333	3.64087	4.67597	3.80284	4.39148	4.08646	4.45718	4.42848	3.49844
7894489	9.83591	10.3879	10.2247	10.0016	10.1217	9.72409	10.5543	10.2638	10.101	10.5322	9.77842	9.93127	10.2846	10.3738	10.3181	9.70525
7894490	7.0688	5.44315	5.51194	6.47501	7.48018	7.02604	6.58908	7.08838	5.6301	6.844	7.81783	6.82122	5.22373	6.9565	6.75758	6.37113
7894491	4.66948	5.12062	4.36541	4.16614	4.23671	3.43408	4.48145	5.03923	3.0966	4.54971	3.75162	4.0007	4.21918	4.39021	4.43971	3.71144
7894492	7.97062	8.00525	8.07314	8.20249	7.95046	8.14911	7.77681	8.38683	7.2689	8.06512	8.71889	7.88531	7.96891	8.20871	7.66458	8.13334
7894493	7.67032	7.00482	6.64848	7.33416	7.73665	7.78131	7.39133	7.85601	7.14566	7.7098	8.59005	7.53504	6.90256	7.63415	7.51426	7.73504
7894494	7.98221	6.46415	6.3401	6.61033	6.5219	7.14225	6.72907	7.57069	5.98689	7.30662	8.50841	6.7492	6.96863	7.20321	6.90302	6.75639
7894495	7.35853	7.43136	7.45576	7.59029	7.81295	7.29464	7.30098	7.34154	6.91299	7.38868	7.28654	7.22033	7.60089	7.41359	7.21201	7.59533
7894496	9.10761	9.29716	8.75856	7.81833	8.7421	8.88923	9.7084	9.0057	8.46488	9.19688	9.07768	9.16393	9.56015	9.40933	9.30624	8.93005
7894497	5.79436	4.64391	4.76367	4.92157	5.04051	4.63853	5.17039	5.0712	5.4297	5.80781	4.93548	4.91083	4.72189	4.74035	5.07782	5.37951
7894498	10.0954	10.9531	10.3046	10.1624	10.3756	10.0804	10.3402	10.4734	10.2657	10.7432	10.1581	10.1719	10.3648	10.2563	10.5692	9.64565
7894499	10.6983	9.98944	9.85566	10.5536	11.1271	10.6682	10.5017	10.4942	10.0018	10.4144	10.326	10.5328	9.71575	10.4334	10.4447	10.3412
7894500	3.02797	2.84693	2.73317	2.87381	2.78725	2.88748	3.2663	3.03764	3.54102	3.10267	2.98777	2.85984	3.08924	3.19216	3.13881	2.98131
7894501	9.86695	9.99313	10.5444	10.4449	9.78092	10.4418	9.66493	9.92419	9.82169	9.8466	10.0511	10.358	10.4075	10.4023	10.3751	10.1209
7894502	3.5651	3.55832	3.03162	3.98593	3.46032	3.36072	4.5161	3.56876	3.39969	4.25265	3.368	3.48208	3.50013	3.50411	3.76363	3.32616
7894503	7.40177	6.57339	6.77358	6.87837	7.26541	6.46758	6.97848	6.54934	7.11577	7.06508	5.99499	6.42132	6.59281	7.13352	7.45084	6.57822
7894504	4.30017	4.80725	5.52777	5.72774	4.24699	4.09851	5.32955	4.30094	5.1522	5.24446	5.18006	5.21165	5.25843	5.80126	3.89375	4.37645
7894505	4.83874	4.38409	4.20376	4.63389	4.93311	4.73634	4.80922	4.83511	4.87273	4.66945	4.8877	5.05681	4.39476	4.97296	4.94892	4.81637
7894506	5.89403	6.22238	5.78186	5.79765	6.36381	5.92625	6.72027	6.33797	4.71552	5.56875	4.86774	5.76375	5.57797	5.70466	5.8841	6.38668
7894507	4.72916	4.15056	4.59537	3.99782	3.94567	4.17512	4.40968	4.14996	4.59614	4.32174	4.12773	5.10856	4.23742	4.35781	4.33157	4.54475
7894508	5.07839	4.1335	4.43113	4.35942	5.20654	4.26171	4.94829	5.15139	4.29043	5.95821	4.16855	4.63688	4.62912	4.82882	4.62962	5.16978
7894509	6.02809	6.55518	6.90253	6.35631	6.25837	6.68847	6.70602	5.42887	5.70163	6.9508	5.78948	6.96415	6.59283	6.3858	6.97866	7.33985
7894510	5.74467	4.67741	4.71844	5.45719	4.86995	5.16975	4.94866	4.5653	5.16373	4.64345	3.75536	5.38149	4.53147	4.19683	4.22545	5.11128
7894511	4.03389	3.5843	4.11025	4.03728	3.87462	4.17398	4.22736	4.0052	3.56828	3.99851	3.85139	4.50049	4.34768	3.65631	3.93706	4.12114
7894512	9.67428	9.03507	10.3098	9.93972	9.23954	9.64618	9.70953	9.47948	10.228	10.1475	10.3058	9.82463	10.1568	10.1387	9.62159	9.34722
7894513	9.81658	10.6537	9.83416	9.70748	9.8058	9.67545	10.3527	10.4028	9.20266	10.818	10.4642	10.149	10.3704	10.5938	9.93025	9.72995
7894514	3.95192	4.53747	3.82764	4.34512	4.11268	4.60867	3.50746	4.49178	4.02738	4.17084	5.75156	4.3115	3.53887	3.95041	3.28633	4.67593
7894515	9.48237	9.64459	9.95548	9.34762	10.0552	9.45793	9.3308	10.0535	9.29153	10.0449	8.59714	9.79922	10.1589	9.41515	9.32624	9.48521
7894516	10.4431	10.0554	10.8012	10.5189	10.5541	10.5044	10.208	10.4414	10.414	10.5661	10.5727	10.6492	10.5547	10.4988	10.4698	10.4738
7894517	4.79465	4.05057	3.81177	3.97289	4.17169	4.22944	4.82574	4.08938	4.87973	3.56624	4.3345	4.04726	3.4057	4.18937	4.08409	4.61806
7894518	7.08742	6.80095	7.1894	6.47231	6.54035	6.56172	6.52964	7.0348	7.88977	6.3725	4.89735	7.41196	6.33366	6.57344	6.90765	7.23237
7894519	6.64406	6.84495	7.39145	7.2214	7.21155	7.42796	7.52243	7.07817	10.3211	7.27304	7.93797	7.5802	7.80269	7.63885	7.10563	6.99181
7894520	8.52199	7.90247	8.3831	8.50399	8.35139	8.41253	8.83139	8.07156	7.93145	8.62437	8.65305	8.34659	8.69164	8.90745	8.54789	8.18415
7894521	3.19756	3.01137	3.44486	3.31207	3.31815	3.23079	3.71671	3.30283	3.23267	3.27331	2.82058	3.00267	3.27729	3.27883	3.89876	3.35405
7894522	9.38214	9.45732	9.25888	9.35364	9.40501	8.93891	8.73898	8.9631	9.6561	8.86982	9.05964	8.79959	9.01941	8.89072	8.86367	9.51511
7894523	9.28255	8.13714	8.32195	9.3306	10.1119	9.54074	9.01922	9.4976	8.54622	9.55104	9.65855	9.15121	8.18911	9.63326	9.4203	8.71926
7894524	3.60633	3.13887	3.03519	3.02539	3.04462	2.90319	3.32253	3.14918	3.30857	3.07237	2.96061	3.377	3.64148	3.41904	3.03731	3.00524
7894525	5.58872	5.02382	4.89727	4.7846	5.09721	5.16314	5.27574	5.27873	4.08426	5.74721	5.7189	5.49176	5.42117	5.40984	6.03721	5.31315
7894526	4.63858	4.39844	5.2082	5.22856	5.23039	4.59427	4.63452	4.5054	5.95788	5.11228	5.66742	4.99869	5.1156	4.49065	4.96207	4.4782
7894527	10.7847	10.3348	10.2951	10.4706	10.0964	9.98411	10.2378	10.6901	9.61958	9.99038	10.3317	9.91286	10.573	10.2704	9.63672	10.0943
7894528	2.63074	3.17307	3.37041	3.00903	2.87152	2.90428	2.7716	3.52171	2.38027	3.70025	3.20223	2.6414	3.07509	2.88075	2.94203	3.79267
7894529	7.61482	7.33127	8.1604	7.85337	6.38028	7.82419	7.03898	7.11156	7.79178	8.1325	5.96984	8.19684	8.0781	7.48838	7.75275	7.908
7894530	4.33104	3.62977	3.24874	4.5397	4.46457	3.75019	5.05775	6.60917	5.0459	4.67497	3.94899	5.168	3.96274	4.64307	4.71969	5.10208
7894531	5.11132	4.15643	4.43211	4.94223	4.79097	4.56769	4.99723	5.17068	4.37523	5.19535	4.51969	4.43275	4.28156	4.71414	5.21725	4.98797
7894532	4.68995	3.95343	4.77858	3.8788	4.8213	3.64378	4.61467	4.37844	3.81478	4.96381	3.78188	4.68029	4.10092	4.10137	4.94748	4.81736
7894533	4.7499	5.88577	5.19229	4.55387	4.74944	4.07062	4.86232	5.55035	4.37436	4.98095	3.77378	4.71805	6.0082	5.37126	4.75251	4.64395
7894534	3.29502	3.23639	3.7324	3.3143	3.288	3.27579	4.26184	3.37336	3.18682	3.99119	3.00721	3.23318	3.53956	3.59264	3.81232	3.50304
7894535	11.5077	11.7253	12.0072	11.5761	11.6786	11.6685	11.6211	11.7199	11.1631	11.4025	11.3834	11.5905	11.7335	11.5319	11.6749	11.6063
7894536	9.89714	10.4926	9.90787	9.70634	9.68767	9.56106	9.99032	10.1671	8.94163	10.2457	9.72818	10.0486	10.5561	10.6783	10.0717	10.0713
7894537	5.98289	4.49438	5.86875	4.96756	6.19192	5.76896	5.77723	6.17762	5.36169	6.8444	4.85012	5.46039	5.55925	5.44363	6.14873	6.10063
7894538	6.23822	6.42521	5.70347	5.71205	5.56511	5.85971	5.26393	5.85189	4.30642	5.65416	5.10501	5.83858	5.933	6.14941	6.6438	5.96735
7894539	5.79423	3.9126	4.89332	6.01806	6.54029	6.37488	7.12287	6.08498	5.57977	7.31541	4.65478	5.74856	5.27568	5.85748	6.0379	6.34432
7894540	11.6208	11.5977	11.6131	11.6346	11.7258	11.802	11.7139	11.8163	11.385	11.4622	11.6818	11.59	11.5697	11.5684	11.7088	11.7889
7894541	2.773	2.67832	3.0532	2.99575	3.07509	2.54946	2.83098	3.11328	3.31097	3.99082	2.57243	2.60233	3.60551	3.23495	3.21429	2.67436
7894542	10.8448	10.6287	11.0147	11.0601	10.2524	10.707	10.4879	10.8829	10.6694	10.3925	10.4196	10.4972	10.7407	10.6975	10.5392	10.3978
7894543	4.54314	5.33651	4.9765	5.30193	5.43671	4.84134	4.90927	5.1317	4.3918	5.77793	4.02808	4.80795	4.79326	5.15907	4.87904	4.83573
7894544	4.36953	3.33722	3.37653	3.87931	4.71209	4.58278	4.46741	4.48617	3.396	5.20083	3.04036	4.29908	3.49907	4.61921	4.38888	4.13323
7894545	3.0102	2.66612	2.94368	2.93384	2.8078	2.82661	3.50045	3.02272	2.76762	3.00195	3.00674	3.3295	2.94185	3.04535	3.2023	3.1581
7894546	8.77355	9.6969	8.78831	8.92211	8.84899	8.78282	8.95497	8.35666	7.90151	8.56803	7.66668	8.693	8.3146	8.33475	8.72262	8.86315
7894547	4.97947	5.17839	4.35617	4.01284	5.51604	4.70833	5.30311	5.6596	4.66558	5.39563	5.29296	5.16773	5.37349	5.23894	4.84254	5.55338
7894548	10.7828	11.3281	11.1586	11.1463	11.2683	10.9298	11.4625	11.3318	11.2373	11.6498	11.3179	11.1748	11.2706	11.3758	11.3776	11.1675
7894549	3.72715	4.18672	3.9364	4.32519	3.60377	3.87448	4.12253	4.19557	3.67953	3.69175	4.17316	3.66742	3.59068	3.96585	4.11309	3.7001
7894550	7.55647	6.92417	7.08572	7.58075	8.31273	7.59002	7.3427	7.57674	7.38513	7.72996	7.10227	7.40721	6.29073	7.7465	7.65207	7.02987
7894551	10.1908	10.3832	10.4208	10.3452	10.3009	10.3562	9.99567	10.1431	9.08182	10.2002	10.131	10.3805	10.1657	10.3071	9.63326	10.2163
7894552	8.102	9.0133	9.42493	9.004	8.69064	8.93297	8.79912	7.85365	9.07802	8.63628	8.81145	9.48692	9.61386	8.9697	7.69282	9.26656
7894553	3.36002	2.99469	2.9597	3.03828	3.08742	3.05063	3.05834	3.02433	3.02906	3.46856	3.04973	3.08979	3.11978	2.77829	3.06619	4.53334
7894554	3.38772	2.80415	2.85931	3.03956	3.19027	3.22749	3.20352	2.86279	3.10466	3.42712	3.11358	3.25429	2.74913	3.12102	3.57888	2.91173
7894555	9.38995	10.1179	9.7678	9.61386	9.79862	9.36434	9.6547	9.42419	9.42338	10.0077	9.7751	9.30969	9.70811	9.77183	9.94988	9.42609
7894556	7.03554	6.41875	6.97902	6.93873	7.57126	7.52489	6.68453	6.85371	6.4787	7.19444	8.04814	7.66581	6.42101	7.50537	6.90322	7.41972
7894557	6.4451	6.42585	6.855	5.97854	6.18285	6.21957	7.08288	6.97937	5.68789	7.08306	5.63424	6.46317	7.94462	7.3415	6.77463	6.37624
7894558	6.939	6.88027	7.06541	6.39888	6.891	6.45732	7.2211	6.72134	6.23643	7.28676	5.59143	6.3573	6.88606	7.18446	7.05326	6.50861
7894559	6.32037	6.6867	5.98496	4.70709	5.49302	5.54192	6.8479	6.59114	5.11637	6.08699	4.24383	6.04251	5.46156	5.41604	6.6308	6.72104
7894560	6.95243	7.26971	6.80503	6.89032	7.40295	6.55923	7.16598	6.9245	6.87457	7.93781	6.27503	6.44248	7.12512	7.2044	6.93858	7.47629
7894561	7.43679	7.80008	7.93925	6.63071	7.29559	7.5325	8.61461	7.64826	7.5681	8.31029	7.74599	7.79189	8.82217	8.65119	8.28233	7.69838
7894562	3.09326	3.01257	3.2942	3.04985	2.96937	3.11243	2.98515	3.35095	3.22956	2.93609	3.50659	2.89782	2.9895	3.03022	2.95759	2.92296
7894563	5.22283	6.92551	5.81724	5.8228	5.58707	4.85702	5.78675	5.2729	4.89889	5.80098	5.82896	5.10736	5.36522	4.9077	5.04955	5.76657
7894564	3.76592	3.13395	3.57242	3.21362	3.26491	3.07079	3.83069	3.26373	4.78728	3.05708	2.59546	3.74073	3.34258	3.40741	3.03599	3.749
7894565	5.41079	3.47494	4.23075	4.79255	5.32183	5.39273	5.26764	5.16556	4.31237	4.86499	4.12604	5.06097	3.90167	5.24052	5.14588	4.6526
7894566	5.271	4.65923	5.70787	5.4659	5.976	5.17545	5.86321	5.36118	4.81768	6.61365	5.91877	5.18936	5.64389	5.49305	6.15122	5.5951
7894567	2.73182	2.6769	2.66447	2.78413	2.76158	2.71087	2.66929	2.83639	2.80983	2.71813	2.67108	2.62557	2.64107	2.60929	2.69402	2.61465
7894568	6.76887	7.46144	7.6144	7.89937	8.06017	7.59914	6.92773	6.87216	6.50744	7.30363	8.74835	6.94759	7.30408	7.53884	7.07048	7.85589
7894569	5.46202	6.01726	5.08084	5.579	5.85738	5.01293	5.57105	5.88105	4.5638	5.12564	4.37021	5.50516	5.91974	5.60017	5.46665	4.33285
7894570	3.8423	3.44983	4.58115	6.01442	3.67833	3.14546	3.94009	3.67833	3.74406	3.75101	3.05907	4.67475	3.91581	5.63183	3.56854	3.39807
7894571	4.08363	3.35388	4.56591	4.33055	4.54395	4.54177	5.50485	4.27107	4.44495	5.23688	4.94891	4.92837	4.63977	4.98354	4.69301	3.71617
7894572	3.56186	4.15699	3.73199	3.94251	4.19103	3.2714	3.96185	3.66797	4.51144	4.34965	3.71557	3.82541	3.63643	3.96579	3.80356	3.86111
7894573	9.50781	7.46504	8.07438	8.93169	9.51682	9.22725	9.2379	9.45541	8.53579	9.02945	8.97775	8.90298	7.82455	9.19382	9.22711	8.33608
7894574	7.21898	7.3249	7.88734	7.31524	7.12062	7.31213	7.77786	6.8731	7.64352	7.76071	6.02231	7.28462	8.44178	7.74966	7.35412	7.30068
7894575	6.10396	4.66832	5.68278	5.63264	5.40631	5.20455	4.8097	5.35986	4.77823	5.39979	4.87888	5.39757	5.8977	5.83021	4.82384	5.96528
7894576	6.46403	5.43264	5.49884	6.15886	5.91665	6.04991	6.16874	6.55559	5.12022	6.26926	4.95575	6.28696	5.65442	5.95428	6.10761	5.76971
7894577	5.89627	4.99344	6.14492	5.71683	6.62774	6.19767	5.59244	5.25706	7.4385	6.52513	6.08695	7.36438	6.17073	6.06508	5.9971	6.42621
7894578	10.9593	9.45072	9.66422	10.7167	11.0765	10.79	10.676	10.7188	9.39375	10.715	10.4873	10.4863	9.25004	10.554	10.7166	10.1982
7894579	10.2636	10.1149	11.0245	10.4751	9.78497	10.6622	10.1222	10.3673	10.424	10.6149	10.4409	10.7784	11.2558	10.9059	10.6126	10.4756
7894580	3.65708	3.11686	3.08655	3.58133	3.5755	3.67164	4.02017	4.09566	3.7811	3.72789	3.34246	3.63409	3.51518	3.87664	3.57515	3.47077
7894581	6.97534	6.32095	6.62733	6.60121	6.103	6.1785	7.0009	7.04697	5.65994	7.23066	6.12344	6.24002	7.07571	6.74471	7.06794	6.33074
7894582	5.40986	5.668	5.97698	5.62209	5.69664	5.4667	5.94864	5.64389	6.6707	6.95958	5.63427	5.88437	5.32412	6.05623	6.10635	6.29796
7894583	7.36694	6.89722	7.44616	6.89899	7.12801	6.96004	7.51679	7.01355	7.11332	8.30414	7.06878	7.21119	7.64047	7.64184	7.61324	7.47273
7894584	3.32928	3.28422	3.32519	3.29504	3.27191	3.27739	3.37287	3.41748	3.4754	3.39768	3.31004	3.26772	3.50764	3.34173	3.34633	3.30937
7894586	4.26228	3.22428	3.79248	3.32056	2.98914	3.97249	3.4874	3.6231	4.14974	4.22052	2.9139	4.14796	3.89311	3.41676	3.68723	3.60114
7894587	4.719	3.95629	4.474	3.89361	4.08411	4.55645	4.8114	5.24692	4.66251	4.91347	3.72049	4.28574	4.6194	4.72717	4.46739	4.93744
7894588	2.9049	2.55612	2.75487	2.48338	2.70554	2.60772	2.81025	2.73822	3.09627	3.0291	2.65016	2.83332	2.89802	3.07602	2.93337	2.53562
7894589	4.2878	3.57991	3.7961	3.54302	3.79335	3.65474	4.09672	4.71071	4.55849	4.36722	3.73683	3.82829	3.75657	3.83181	4.18119	3.49811
7894590	7.38879	5.72922	4.37606	5.20115	6.42956	5.34465	6.69734	6.66953	7.33708	6.76606	5.97909	5.60399	4.83501	6.34092	6.12747	5.85658
7894591	4.26713	2.88332	3.05484	2.83893	2.96625	3.31206	3.55222	3.64703	4.11086	3.02789	2.89365	2.95058	3.02447	3.18796	3.22149	3.25581
7894592	6.28589	6.08237	6.35476	6.59282	6.22887	6.61489	6.04092	6.44083	6.50269	6.27166	7.26953	6.51243	6.37485	6.4858	6.04843	6.54922
7894593	4.92076	3.6475	3.72427	4.16676	4.85211	4.58577	5.78179	4.95331	2.95752	5.28115	3.40568	4.3659	3.47648	4.6945	4.88773	3.69054
7894594	3.44274	2.9857	2.93416	2.99368	3.21822	2.85256	3.05319	3.84961	3.00979	3.2607	3.0377	3.26842	3.13668	2.98388	2.946	3.0734
7894595	7.97742	7.36537	7.25392	7.74991	7.79648	7.79737	7.47325	8.3608	6.99193	7.78053	7.00798	7.37537	6.76829	7.50903	7.78387	7.73221
7894596	10.4216	10.4944	11.5443	10.9483	10.9401	11.1352	11.0235	10.467	11.0368	11.464	11.2941	11.2413	11.4081	11.0052	11.3024	10.8415
7894597	8.42369	7.80543	8.08288	7.4174	7.29023	7.64401	8.74055	7.95734	7.6684	8.18366	6.77027	8.17944	7.94944	8.46401	8.31345	8.37481
7894598	6.8495	6.86323	6.60008	7.08549	7.27926	6.66347	6.77378	6.54779	6.15424	7.20428	6.57347	6.92905	7.15221	6.97709	6.88583	6.42502
7894599	5.76121	6.69604	7.1777	6.45828	6.18997	5.53919	6.06686	5.84729	5.94439	6.92865	6.93292	6.86964	7.79119	7.2778	7.13599	6.15932
7894600	4.24843	4.12779	4.01397	4.03766	3.67833	4.42142	4.65032	3.24088	4.21906	3.68863	3.42459	4.59618	4.94601	3.93212	4.0222	3.80508
7894601	5.62961	5.5617	4.93708	4.55866	4.68432	4.41011	6.09509	4.94266	4.61801	4.46124	4.13902	4.64063	4.29627	5.20304	5.39992	4.90177
7894602	2.7222	2.80599	2.68003	2.81722	2.86288	2.72566	2.73106	2.85139	3.34233	2.71774	2.69673	2.72698	2.63765	2.81334	2.9978	3.00308
7894603	5.23436	3.78966	3.71476	5.14477	5.12538	4.90963	4.44759	4.32425	5.64135	5.09963	4.72234	5.4798	4.39662	4.43246	4.41183	4.07067
7894604	9.51866	9.12394	9.76278	9.14564	9.88473	9.33715	9.89901	9.94894	8.74016	10.2188	8.85896	10.1196	9.49184	9.33068	9.98786	9.92271
7894605	11.5963	11.9196	11.8625	11.6529	11.7491	11.7448	11.4662	11.4964	10.8234	11.7664	10.8503	11.6609	11.4806	11.5933	11.3339	11.4734
7894606	5.32433	5.09673	5.98865	5.88684	5.56837	5.77146	5.62093	5.11772	5.38203	5.62863	5.43626	5.28719	5.05202	5.4574	5.14465	6.45199
7894607	6.76489	5.4648	7.03522	7.17811	6.50895	6.67864	7.16083	6.09395	6.97969	6.62015	4.95568	7.46796	7.00585	6.43805	5.89619	6.91788
7894608	5.95191	6.72521	5.10301	5.44305	6.82959	6.09796	6.371	5.8716	5.14637	6.52575	4.26252	4.72236	5.83995	5.12536	5.34926	5.74347
7894609	8.43291	6.96084	7.35975	8.08842	8.56464	8.32592	8.07449	8.17565	7.00334	8.22785	6.97329	8.15769	6.7707	8.32406	8.0679	7.60351
7894610	5.02701	4.62358	5.66176	5.12559	4.88147	5.15914	4.85277	4.48174	5.29361	4.8108	5.36022	5.75819	4.79347	4.51115	4.3775	4.77612
7894611	4.22778	3.82315	4.1073	4.13739	3.75036	3.98901	4.70733	4.82427	4.13726	4.82245	4.12194	4.06565	4.8221	4.57388	4.09722	3.91043
7894612	8.61241	7.21254	7.56771	8.57439	9.18969	8.68338	8.28053	8.71823	8.18662	8.72285	9.11117	8.41643	7.26133	8.57149	8.55972	7.75868
7894613	10.9021	8.597	9.3646	10.4324	11.1502	10.7636	10.6354	10.7542	10.128	10.8552	10.2213	10.535	8.8677	10.6604	10.6253	10.0445
7894614	4.61151	3.59006	3.83665	4.32472	3.96452	4.32167	4.28536	4.63338	6.38904	4.12357	5.51365	4.21066	3.86073	4.05528	4.71378	4.20159
7894615	3.70132	3.03073	2.88849	3.54861	2.57196	3.40265	3.50272	3.06078	3.11317	3.54741	3.69716	3.8842	3.54513	3.83297	3.16526	3.93604
7894616	4.14794	3.02126	3.52663	3.79817	4.40774	4.40531	4.6904	3.81902	3.51785	5.25691	3.86216	4.6426	3.16009	4.12581	3.65502	3.27178
7894617	7.10618	7.02745	7.66147	7.4415	7.7578	7.43169	7.78525	7.90694	6.88752	8.13979	7.80608	7.60703	8.87178	7.91996	7.78831	7.26494
7894618	6.77025	4.61083	4.48137	5.69744	7.6469	6.77361	6.38655	7.53293	6.2462	7.17712	4.23905	6.44636	5.56938	6.50871	5.76598	5.84576
7894619	8.07533	7.70593	7.32531	7.37363	7.9779	7.55466	8.40277	8.15347	5.62077	8.33335	7.43971	7.68977	7.51941	8.22677	8.11884	7.58854
7894620	4.65649	4.43674	3.71246	3.8242	4.18376	3.95366	4.6947	4.98133	3.97019	4.38596	3.9874	4.0219	3.98429	4.03308	3.98309	4.46651
7894621	9.23057	9.04885	9.50678	9.38746	7.01378	8.95237	9.11355	9.25615	9.44077	9.01978	9.02761	8.63389	9.42653	9.09751	9.08382	8.89639
7894622	3.46764	2.90175	2.81161	3.11304	3.91978	2.91891	3.5895	3.15443	2.8055	3.62383	2.62884	2.93433	3.00871	3.33973	3.1327	3.07699
7894623	3.48563	2.99094	3.1033	3.07087	3.13263	3.21071	3.36507	3.36593	3.18232	3.27768	3.29927	3.42411	3.13169	3.71818	3.35036	3.27879
7894624	7.8447	5.83131	6.74272	7.67307	8.43642	8.17683	7.60829	7.55609	6.63667	7.74532	8.61417	7.78412	6.7705	7.9951	7.63743	7.05852
7894625	5.28269	4.3395	5.19369	4.51576	4.28245	5.49711	5.76742	4.88086	3.98512	4.82873	4.06047	4.97652	5.80728	4.93845	4.55956	6.01885
7894626	10.2995	8.91263	9.55535	10.5387	10.8604	10.4857	9.97812	10.2414	9.93347	10.0726	10.2537	10.4138	9.30838	10.2736	9.85027	9.98379
7894627	6.52579	5.0907	6.14947	5.83106	4.42887	4.79362	6.70815	6.4256	4.78953	6.78355	4.73322	4.87449	7.21356	6.11187	5.5421	5.23938
7894628	6.48516	4.22485	4.80091	5.79495	7.11932	5.9782	5.75038	5.40857	7.37792	5.82531	5.08694	5.59696	4.7914	5.92704	5.99812	5.358
7894629	5.57042	5.83245	5.12627	4.60524	5.84576	4.9381	5.22699	5.75638	4.59143	5.78962	2.72054	5.0847	5.82669	4.712	4.53218	5.55985
7894630	3.40456	3.31534	3.56789	3.25198	3.42797	3.39153	3.69485	3.49425	3.69043	3.59834	3.17887	3.37974	3.94991	3.84762	3.76565	3.82491
7894631	5.74349	6.83922	5.33308	4.81021	6.06854	5.41712	5.98933	5.46895	4.93389	5.66454	3.78498	5.86434	6.59737	5.73438	5.79618	5.94975
7894632	5.15945	4.48261	5.22612	5.67862	5.69331	5.77235	5.31234	5.3683	5.43381	5.43378	4.76211	4.63124	5.64686	5.19894	5.3346	5.09283
7894633	5.54339	5.4329	5.49605	5.83945	5.68571	5.80136	5.05024	5.39874	4.80739	5.30271	6.16559	5.63779	5.386	5.56597	5.07019	5.97397
7894634	11.0719	11.4702	11.2845	10.9303	10.9262	10.9493	11.6471	11.4015	10.3271	11.61	11.4954	11.4362	11.4525	11.3582	11.1945	11.5795
7894635	6.46881	7.79898	6.45953	6.6967	7.1466	6.37976	7.83553	7.47543	4.14412	7.28406	5.68363	5.93355	5.75023	6.18257	7.75433	5.72267
7894636	3.70216	3.12939	3.31233	3.09394	3.16635	3.30866	3.45575	3.1837	3.4391	3.13647	3.09611	3.3123	3.61208	3.29957	3.16558	3.27564
7894637	7.31918	6.96814	7.86073	7.66173	7.34384	7.89543	7.49921	7.6923	6.47341	7.32372	5.85741	7.46905	7.97506	7.59409	7.87172	7.81952
7894638	8.61466	8.76635	9.47248	9.00102	9.09255	8.68496	8.82292	8.93673	8.66857	8.90837	8.12027	9.56773	9.29503	8.66701	8.47322	9.26593
7894639	7.38749	6.93328	7.98935	7.40648	7.303	7.54302	8.10759	7.48518	9.25646	7.45361	7.58785	7.89039	8.79975	8.25469	6.71652	7.18401
7894640	11.5499	11.1297	11.2135	11.3423	11.5245	11.2892	11.2188	11.2632	11.3672	11.1376	11.2426	10.642	11.2893	11.3303	11.3855	11.1698
7894641	4.65748	4.49423	4.45219	5.24954	5.23424	5.40468	4.95171	4.97814	5.56417	5.68004	4.87804	5.21884	5.04607	6.02699	4.63692	5.5778
7894642	9.53924	9.01986	9.46016	9.24264	9.51334	9.17444	9.44469	10.0071	9.01936	8.78725	8.21423	8.55868	9.08863	9.2817	9.22326	8.82794
7894643	2.62719	2.68298	2.7751	2.79858	2.90908	2.77477	2.9178	3.03546	4.74638	3.23157	3.32848	3.11416	2.83391	2.90656	2.83419	2.78015
7894644	5.77497	5.05637	5.33042	5.20224	5.75284	5.61919	5.28753	5.41442	5.44932	5.36176	5.39421	4.90762	5.34815	5.60211	5.67445	5.35588
7894645	9.42554	8.90146	9.02391	9.06134	9.60689	8.98675	9.1371	8.77367	9.12633	9.07266	8.25764	8.78963	8.73576	9.01466	9.12644	9.13132
7894646	3.74556	3.6172	3.61552	3.62402	3.55854	3.46949	4.335	3.81186	3.91426	4.18507	3.54554	3.04875	3.25983	3.62161	3.55952	3.9119
7894647	12.1458	10.6104	11.2902	11.7757	12.33	12.0839	11.9801	12.065	11.1625	12.1123	11.9518	11.7619	11.0585	12.1401	12.0491	11.3139
7894648	8.67938	8.80653	8.03015	8.83689	8.43712	8.05501	9.05628	9.15628	7.18048	8.90782	8.09679	8.11733	7.86843	8.54654	9.02433	7.80286
7894649	4.04106	4.19028	4.12139	4.11773	4.25057	3.97372	3.93611	4.11973	4.35303	4.11856	3.5139	4.20884	4.01822	4.02569	4.00812	4.17382
7894650	4.54209	4.22729	4.18597	4.44252	4.16886	3.61397	4.28236	4.34555	4.39248	4.10718	3.6117	4.18549	4.42021	4.31971	4.02319	4.01471
7894651	3.59346	3.01773	3.06189	3.01627	3.20999	3.25087	3.52599	4.20451	2.82246	3.35019	3.58763	2.97562	3.18026	3.34992	3.09794	3.63751
7894652	4.54358	4.87567	4.29594	3.71087	4.98477	4.49801	4.70058	3.44094	3.8895	3.99105	4.97239	4.629	4.45287	4.40827	4.20524	5.24898
7894653	10.6016	10.6006	10.494	10.6518	10.8257	10.4957	9.92022	10.065	11.2711	10.0782	10.3714	10.3259	10.1445	10.3726	10.2973	10.7905
7894654	3.3203	3.45384	3.48462	3.14856	3.29886	3.19426	3.29057	3.47966	3.04846	3.60714	2.92602	3.07036	3.61348	3.66166	3.33453	3.42542
7894655	5.99445	5.92324	5.864	6.07385	6.20201	5.81425	5.4673	6.11615	5.89757	6.14841	6.47505	5.96994	5.99541	6.32012	6.20824	5.96362
7894656	3.75553	3.56869	3.78226	3.55518	3.49561	3.77868	4.22235	3.39239	3.83527	3.7917	3.80313	4.53811	4.01648	3.75403	3.60379	4.19461
7894657	7.58416	7.90943	8.59949	8.33074	8.26157	8.12534	8.33563	7.24184	7.91403	9.47719	9.2477	8.27884	8.82342	9.15295	7.99085	8.37697
7894658	5.78313	3.8085	4.14809	4.25663	4.5911	4.47135	5.2452	5.49205	3.53095	5.70201	4.601	5.64562	4.67579	4.81012	4.72847	4.96185
7894659	2.94859	2.83276	2.95554	2.73283	2.8414	2.84325	2.98988	2.72043	3.04805	2.95992	2.66014	2.9859	2.77754	2.78283	2.97721	2.67901
7894660	4.89864	3.54489	4.36058	3.90296	4.41031	3.36309	5.34749	4.79555	3.11804	5.43192	3.29872	4.17857	4.8342	5.71075	4.5272	3.51285
7894661	11.164	11.3702	11.183	11.2443	11.1757	11.0956	11.3013	11.2174	10.8197	11.0138	10.9497	11.0344	11.3419	11.1665	11.1725	11.0505
7894662	10.1531	10.4309	10.4693	10.1051	10.5417	9.93357	10.8939	10.455	10.2876	11.1667	10.6535	10.354	10.73	10.7166	10.8062	10.0794
7894663	3.28808	2.99703	3.3615	3.55132	3.09699	3.02683	3.82325	3.42098	3.63769	3.24827	3.11918	3.19343	3.41697	3.50854	4.30404	3.04909
7894664	5.03998	4.17886	5.48176	5.1801	4.83864	4.24843	4.71443	4.60436	8.43219	4.67173	4.08544	4.81553	5.88611	5.15061	4.84254	4.82779
7894665	9.19243	9.40463	9.57919	9.26292	9.13373	9.26503	9.64116	9.32026	9.11116	9.43172	9.15986	9.25049	9.75266	9.54956	9.13499	9.35917
7894666	11.2755	11.2533	11.1891	11.4921	11.3357	11.2913	11.1747	11.5714	10.513	11.5121	11.2517	11.3381	11.2157	11.4422	11.181	11.3569
7894667	3.02623	3.15581	3.12261	3.26576	3.44226	3.13231	3.38654	3.24099	2.90835	3.70956	2.93903	2.98962	3.44941	3.41512	3.1754	3.67935
7894668	6.45574	5.75016	6.06589	6.18269	6.70001	5.91701	5.73376	6.00313	6.49187	6.104	5.75543	5.25485	5.96739	6.11891	6.11143	5.48501
7894669	3.55439	2.94771	3.35723	3.26035	3.18329	2.86977	3.54709	3.36053	4.01181	3.66335	3.62818	3.71361	3.27528	3.55204	3.31861	3.9829
7894670	8.05276	7.45413	6.72533	6.75132	8.65233	7.82184	8.43618	7.82161	6.52737	8.48987	4.58023	6.76372	6.83883	6.89362	7.33909	8.33113
7894671	7.16565	6.45796	6.45175	6.84092	7.35225	7.27478	6.90241	6.99352	6.84129	7.41151	7.59687	7.31762	6.28367	7.02345	7.14627	6.82829
7894672	9.95135	9.12351	9.74971	10.0268	10.0553	9.69997	9.76855	10.3044	9.15429	10.242	10.5444	9.8192	10.1583	10.2181	10.2556	9.69866
7894673	6.61893	6.78493	6.88258	7.17827	7.71525	7.01694	6.66221	6.53176	6.11591	6.72677	6.70663	7.5357	6.27365	6.65726	6.85384	7.01653
7894674	10.0168	10.274	10.2138	10.7031	10.2728	9.86372	9.83565	10.2949	9.19838	10.3252	9.20131	10.0624	10.6793	9.92657	10.3137	10.1762
7894675	8.61731	8.78135	8.70834	8.48928	8.77792	8.27058	8.60368	8.81065	7.85524	9.1615	7.99955	8.8696	9.63006	8.81474	8.59544	8.45187
7894676	4.88274	4.73772	3.98753	4.04496	4.29851	4.70609	4.36499	5.36515	4.18797	3.99965	4.54793	4.18245	4.81517	4.29285	4.21671	4.61879
7894677	4.30474	3.60074	3.30746	3.30134	4.25753	3.87848	3.77605	3.64713	3.78997	4.343	3.59026	3.72598	3.77187	3.54149	3.56687	3.82455
7894678	5.94365	6.7152	6.67846	7.03199	6.98582	6.55796	5.8415	6.19433	5.84795	6.18927	6.65084	6.41172	6.06564	5.85787	6.1679	6.17268
7894679	4.10098	3.46825	4.17529	4.18498	4.17545	3.70986	3.5373	4.57042	3.58352	4.65696	4.44344	3.79803	4.50989	3.96623	3.94298	4.80867
7894680	7.8998	6.46098	6.80798	7.74423	8.15747	7.74067	7.53076	7.40225	6.65992	8.00251	6.96548	7.60064	6.61952	7.60155	7.484	7.03533
7894681	8.56101	7.84352	9.00937	7.94643	8.49527	8.30647	8.5882	8.60514	8.73973	9.02243	8.81538	8.97591	8.93751	8.65743	9.02234	8.88445
7894682	11.7743	12.2168	12.2356	11.6909	11.9894	11.8605	11.9871	11.9182	11.8783	12.1791	11.8499	12.2889	12.1608	12.089	11.9326	12.1511
7894683	6.12891	5.1768	5.89495	6.47964	5.29312	4.61702	6.46285	5.76215	4.7191	5.72353	3.20223	4.8976	5.73892	4.98615	5.7066	5.66293
7894685	10.6436	10.4945	10.6344	10.7417	10.7356	10.5949	10.3855	10.6183	10.085	10.6861	10.8222	10.5395	10.8	10.9091	10.4765	10.6257
7894686	4.78589	3.17663	3.78463	3.30999	3.42363	4.08715	4.47245	3.8326	3.92882	3.53935	3.53813	3.82029	4.32989	3.99335	4.50592	4.02195
7894687	10.7488	11.2543	11.4722	11.4982	11.1438	11.4125	10.8441	10.8583	11.1272	11.1274	11.1459	11.4252	11.3443	10.9513	11.2461	11.2243
7894688	6.73972	6.60357	7.09451	5.57728	7.3503	6.7752	6.91725	7.02765	4.61147	6.9706	3.73207	6.45118	6.45463	5.85612	5.49145	7.29079
7894689	7.18359	6.41845	6.47106	6.85552	6.86837	6.97224	6.48813	6.76168	5.61612	7.39955	4.67617	7.18477	6.4549	6.99477	7.09077	7.51518
7894690	4.47103	3.63121	3.74565	4.52486	4.19645	4.54652	4.22348	4.33222	3.30787	5.35349	5.25844	4.65747	4.0987	4.92022	5.17089	3.94113
7894691	3.95546	3.68275	3.58325	3.44065	3.57492	4.06893	4.38996	3.46471	4.02573	3.92557	3.06924	3.97306	3.72792	4.31497	3.52511	3.64774
7894692	6.13018	4.83474	4.84184	5.03699	4.89768	6.11183	5.52041	6.0055	5.46705	5.70339	6.48186	6.03577	4.99712	5.28733	5.73341	6.53057
7894693	7.00196	7.46822	7.06823	6.83549	8.11125	7.64953	6.9367	8.12122	6.84178	7.69219	6.1969	7.57528	7.70453	7.0016	6.87204	7.67613
7894694	8.80261	6.58266	8.10832	7.52278	7.96949	8.34614	7.26568	7.80195	6.39342	7.35057	5.00664	7.27825	8.27925	7.19268	6.32258	6.87769
7894696	7.91916	7.06296	7.07006	7.87726	8.24167	7.87372	7.86039	7.95312	7.5543	7.87285	8.06181	7.87936	6.34084	8.06128	8.00099	7.56819
7894697	6.31676	5.86983	5.71334	6.07313	5.60831	6.59239	6.16535	6.55773	5.58146	6.0379	8.17897	6.50516	5.65155	5.56767	5.98685	6.66305
7894698	8.90962	9.13582	9.3615	9.06288	7.81573	8.89494	8.29236	8.95364	8.63404	8.25756	7.09294	8.88916	9.19099	8.25617	8.78871	9.01149
7894699	9.95148	10.7618	10.5529	9.9226	10.0951	10.4294	10.19	9.93957	10.021	10.9662	11.0081	10.6446	10.4818	10.6225	10.6374	10.4547
7894700	8.09013	7.79372	8.4299	7.89437	7.25106	7.68616	7.55739	8.11475	7.44472	8.17374	6.95456	7.96581	7.93988	8.04039	7.44236	8.11073
7894701	6.86097	4.73663	6.84321	6.12266	5.69816	5.81523	6.56943	6.41879	5.67414	6.42639	4.36211	6.53144	7.0813	5.39014	6.21165	6.94381
7894702	4.54258	4.56114	5.55128	5.50182	5.46265	4.14069	5.83823	5.60339	5.8192	6.00224	4.05059	4.98751	5.15194	5.91856	5.19086	5.84538
7894703	4.73339	3.81616	3.95279	4.02053	4.416	3.92795	4.63982	4.49563	5.12666	4.49848	3.949	4.31563	4.06343	4.37653	4.67091	4.28391
7894704	9.27939	8.71077	10.3791	9.70763	9.53553	9.80072	9.63023	9.03256	9.82948	10.2651	10.1325	10.2609	9.97229	9.54453	9.92785	9.6819
7894705	2.99538	3.17359	2.98301	3.01575	3.13886	3.09553	3.2247	3.00251	3.1587	3.06178	2.88798	3.19988	3.10173	3.36283	3.23818	3.15781
7894706	5.52719	4.33929	4.66911	5.7636	5.58421	4.8385	5.04805	5.33607	4.92734	5.82267	4.03978	6.2249	4.51742	5.0723	4.79915	5.4874
7894707	5.87205	5.37779	5.65271	5.77081	5.72511	5.36093	5.59371	4.96657	5.333	5.52064	5.31055	5.36194	5.72303	5.3747	5.49658	5.43002
7894708	7.78253	7.7923	7.75474	7.45041	7.42887	7.89419	7.94021	8.18885	8.30862	8.00405	8.46793	7.94786	8.4365	8.0534	7.62149	7.95127
7894709	6.70409	6.03516	6.2497	6.90684	7.53747	6.51682	6.65136	6.81609	6.71524	7.08752	7.39467	6.98881	6.27428	6.83114	6.7764	6.47071
7894710	3.11958	2.94297	3.03714	3.03614	3.03736	2.89024	2.9695	2.91774	3.08983	3.68287	3.04309	3.08286	2.76579	2.87584	2.97363	3.12497
7894711	9.55755	9.541	9.7306	9.28545	9.40787	9.35556	9.84679	9.76907	9.0123	9.47796	7.90893	9.32069	9.6284	9.31442	9.26112	9.48722
7894712	7.68772	8.08269	8.45109	7.69525	8.08798	8.169	7.72715	7.83953	7.62498	8.4622	7.24903	8.81865	8.39593	8.03157	8.2392	8.35199
7894713	3.9908	3.06273	3.1711	3.58308	3.94083	3.2443	3.13897	3.93215	3.5097	4.26375	4.74182	3.81202	3.06759	3.56013	3.30449	4.11808
7894714	4.51809	3.74849	4.12519	4.21955	4.57868	4.88792	4.60918	4.2352	3.96977	4.38366	4.31248	4.31219	4.35962	4.93728	4.53133	3.72169
7894715	3.12087	2.90209	3.24321	2.95853	3.06766	2.91776	3.20508	3.11964	3.46339	3.32559	2.90085	3.04615	3.10449	2.95815	3.19114	3.07313
7894716	9.27068	8.8175	8.65431	8.67243	8.80283	8.70144	9.46388	9.02064	7.75958	9.41986	8.58045	8.62193	8.99898	9.3066	9.04788	8.45321
7894717	7.06605	5.63284	5.41739	6.46588	7.10531	6.58516	7.31415	7.68075	6.03848	6.64016	5.60791	6.52873	5.24341	6.96085	6.77992	6.30888
7894718	3.58039	3.28853	3.48387	3.61668	3.5731	4.14693	3.66498	4.2333	4.2566	3.75195	3.55271	4.00695	3.9394	3.95629	3.95636	4.41446
7894719	4.994	4.77296	4.82342	5.12698	5.02749	4.81601	5.01863	5.30205	4.77703	5.24429	5.73004	4.84288	5.05242	5.32945	5.32838	5.15826
7894720	8.7155	7.88227	7.78637	7.93007	8.07378	8.50637	7.89918	8.3603	6.61797	7.25364	6.23489	8.23228	7.22676	7.95459	8.28239	8.70438
7894721	4.19285	4.5471	4.25032	4.41639	4.96535	4.0696	4.47591	4.31734	3.70165	3.80839	4.11857	4.30178	4.16294	4.22521	4.33905	4.24949
7894722	7.85046	8.76877	8.01549	7.7854	7.74077	7.42659	8.19359	7.78056	6.75953	7.91562	6.99016	8.02769	8.18944	8.19144	8.40392	8.4727
7894723	9.84921	7.84886	8.31087	9.49104	10.3032	9.76804	9.4275	9.70151	8.60951	9.63649	9.44025	9.35362	7.73541	9.53659	9.4559	8.76653
7894724	3.48281	3.24169	3.26862	2.93472	3.30568	3.06506	3.697	4.24821	3.33747	3.44751	3.51059	3.50013	3.206	3.24773	3.57909	3.32439
7894725	10.4956	10.2237	11.0787	11.4114	11.0941	10.773	10.5184	10.5633	10.6087	10.9199	10.3745	11.1348	11.1343	10.7785	10.7169	10.653
7894726	3.78187	3.43922	3.93061	4.11941	3.66853	3.94504	3.86429	3.22533	4.55721	3.97837	3.22318	4.03913	3.74424	3.71583	4.66793	3.89791
7894727	6.59715	3.82992	4.8077	5.09352	7.50016	6.39087	7.05001	7.60614	7.3665	7.16411	5.27111	6.49879	4.88441	6.09847	6.40732	5.46784
7894728	4.69187	4.17003	3.63299	3.97473	4.38219	4.02426	4.53206	3.99983	3.35837	5.25178	4.42196	3.9215	3.91185	3.85833	4.07043	4.48984
7894729	4.76161	4.41337	4.95887	4.66027	4.70322	5.11258	4.75848	4.55299	4.63998	5.04695	5.7763	4.67141	4.78582	5.01735	5.28853	5.17847
7894731	4.62571	3.18585	4.57017	4.52699	4.11083	5.53525	5.95915	4.57677	6.2941	4.98452	3.54724	6.6503	4.07161	5.65149	5.14177	4.54257
7894732	8.75363	9.76394	8.83691	8.62638	8.75684	8.27015	9.47633	9.55896	7.518	9.85705	8.38968	8.93379	9.27162	9.47111	8.60905	8.4936
7894733	7.85032	7.61352	7.57552	7.77788	8.07854	7.63005	7.28136	7.71761	7.64973	7.57982	7.96513	7.60554	7.48689	7.58242	7.55726	7.98141
7894734	9.24037	10.0509	9.52927	9.24034	9.85444	9.45057	9.50564	9.67493	7.9009	9.40484	7.35509	9.33096	9.41384	9.03386	9.24547	9.6668
7894735	2.80834	2.90855	2.84876	2.7876	2.93265	3.00602	2.76969	2.99459	3.37196	2.77348	4.03382	3.04789	2.83336	2.8226	2.72993	2.94866
7894736	5.80558	6.42983	6.14523	5.95642	6.83813	5.97626	5.68102	6.83111	5.7344	6.9391	6.74881	6.59421	6.25926	5.93435	6.44973	6.16176
7894737	8.63743	8.0104	8.01915	7.7857	7.72032	8.14822	8.03504	8.53663	8.25816	8.73901	8.31163	8.11969	8.91538	8.68058	8.65663	8.42116
7894738	4.454	3.52155	4.15721	3.66352	3.65085	4.09225	3.84384	3.92307	4.00999	3.79783	3.30936	4.30671	4.57034	4.16046	3.90071	4.47913
7894739	3.28457	4.06662	3.30637	3.33617	3.77241	3.55273	3.28681	4.04736	6.52884	4.57607	3.43891	3.03175	3.44821	3.78286	3.56679	3.80652
7894740	10.2774	10.4327	10.2397	10.1107	10.395	10.0821	11.0963	10.7289	9.05162	10.4597	10.0094	10.2394	10.8587	10.9243	10.1855	10.2941
7894741	6.87713	6.18619	6.59977	7.13404	7.56994	6.95592	7.1195	6.79322	5.60429	7.01595	6.48414	6.99453	6.09887	6.71128	7.10138	6.29618
7894742	5.928	4.93853	4.67492	5.03497	5.00263	4.61636	5.1435	5.53165	4.62933	5.09726	4.90547	5.14806	4.88425	5.33168	4.89642	4.81533
7894743	3.33541	3.08254	3.47122	2.94497	3.07147	3.40384	3.51624	3.40302	6.20633	3.19693	3.14102	3.26967	3.1456	2.97333	3.75066	3.00299
7894744	9.96699	10.2526	9.59203	9.98907	9.25978	9.02557	9.55103	9.82183	8.05327	9.79706	9.3839	9.40615	9.83643	10.1993	9.50081	10.216
7894745	3.88776	4.29212	3.71768	4.1978	4.30498	3.77632	3.48846	3.9856	3.60761	4.1663	4.79011	3.6415	3.97427	3.86163	3.92539	3.77653
7894746	3.54249	3.51616	3.43	3.49417	3.56625	3.45561	4.163	4.20443	3.76119	3.83831	3.102	3.51157	3.33006	3.39537	3.49185	4.18274
7894747	9.10523	7.14931	7.51413	8.62931	9.39103	9.05045	8.75171	8.9523	7.88498	8.79818	9.07046	8.81466	7.31591	8.84795	8.78195	8.20282
7894748	4.43744	3.98618	3.82676	4.00496	3.80095	4.29158	4.28159	4.09996	3.45213	4.15845	4.00029	3.77467	3.70982	4.19515	4.1176	4.65634
7894749	3.90881	4.76143	4.20142	4.04636	4.11742	4.36797	4.57702	3.94586	3.87901	3.68485	3.42392	4.54574	3.82857	3.84411	3.69878	4.89786
7894750	2.77853	2.74208	2.72792	2.70896	2.72352	2.75766	2.76037	2.79097	3.00762	2.75985	2.77512	2.71722	2.79111	2.74433	2.75451	2.79096
7894751	4.81458	4.32971	4.66215	4.23596	3.64416	3.99708	4.47948	3.89411	4.02562	3.69584	3.09651	4.5116	3.68049	3.65257	4.83163	4.86799
7894752	5.44707	4.64628	4.90939	4.9895	5.02865	5.095	5.25669	5.02444	4.77351	5.54746	3.49735	5.89634	4.27112	5.05619	5.10214	4.949
7894753	4.25447	3.05293	3.36845	3.38988	3.24533	3.66738	3.90082	4.64474	2.9944	3.7742	3.31701	3.73596	2.84031	3.82423	3.86544	3.17441
7894754	6.56429	5.51241	5.40833	5.75964	6.21381	6.31246	6.73162	6.91853	4.41008	6.95936	6.52682	5.99971	4.8946	6.24928	6.19503	6.57112
7894755	3.30576	3.48133	3.21693	3.67706	3.37855	3.78127	3.40514	3.61793	3.18896	3.76533	3.19124	3.19205	3.50965	3.42075	3.2949	3.78929
7894756	7.14272	7.40336	7.6612	8.02606	7.46278	7.50839	6.89775	6.99283	6.24283	7.40214	7.77945	7.79176	7.55965	7.26939	7.4934	7.71447
7894757	10.3831	9.89676	10.4607	9.95292	9.79828	10.4262	10.3157	10.6875	10.5843	10.525	10.505	10.6579	10.4772	10.7502	10.7481	10.1912
7894758	9.80132	10.6645	10.2932	9.66951	9.80461	9.8781	9.8943	9.49209	9.72986	10.4445	10.0295	10.1848	10.1519	10.24	10.2346	10.2057
7894759	2.77383	3.56458	3.47305	2.91208	3.00142	3.12195	3.05608	3.07069	2.93833	3.02526	2.70074	2.94281	3.51854	3.47159	3.30849	2.83469
7894760	8.98361	8.31152	8.17442	8.54746	9.16677	9.06285	8.78412	8.88821	7.96467	8.81562	8.16085	8.71417	8.21019	8.34686	9.01596	8.93334
7894761	8.79475	8.13118	9.37754	9.16428	8.39909	8.63045	9.21424	8.95298	9.36264	9.64278	8.97038	9.22881	9.44244	9.26826	8.8618	8.3979
7894762	5.23695	3.75876	3.80351	4.09058	3.73888	4.40045	4.07541	4.96754	4.3595	4.52123	4.47405	4.3752	4.07227	4.25531	4.43371	4.43589
7894763	9.67284	9.07834	9.42076	9.53571	6.41313	9.46709	9.51463	8.98579	8.49896	9.15518	9.09629	9.70932	8.80053	9.34495	9.09719	9.84779
7894764	5.49107	4.45602	4.51402	5.22186	4.92442	5.19131	4.80839	4.3699	5.08235	5.10458	4.2533	4.39175	4.79704	4.44815	4.90656	4.45486
7894765	6.00188	5.72833	5.76933	6.10492	6.62301	5.96999	5.48736	5.0361	6.47279	5.80566	5.52321	5.71179	6.00392	6.02004	5.73219	6.23133
7894766	4.77067	3.35296	3.46872	3.85212	4.64515	4.17907	4.29746	4.36762	3.82094	5.1939	3.74247	4.92185	4.08117	4.51975	4.13375	4.10179
7894767	11.3911	10.9092	11.6254	11.5071	10.7961	11.1018	11.0837	11.0915	11.2019	11.2023	10.6429	11.4024	11.3863	11.3704	11.3059	11.2596
7894768	10.1486	8.24258	8.77166	9.96676	10.7025	10.1225	10.1964	10.2371	9.718	10.2103	9.62022	10.1426	8.4489	10.1288	9.80231	9.1657
7894769	8.43233	8.89806	8.73932	8.76137	8.72478	8.43578	8.31081	8.52358	7.51221	8.93494	9.33029	8.41374	8.66409	8.81947	8.25033	8.23641
7894770	12.2137	10.7085	10.9717	11.8075	12.3473	12.1804	12.1549	12.2872	11.3409	12.2111	11.9128	11.9673	10.71	12.1325	12.1309	11.6052
7894771	8.31979	9.37212	9.58903	7.90399	8.80644	9.3757	9.17452	9.25811	9.3413	9.21452	8.0174	9.48087	9.56454	8.99142	8.65125	8.64207
7894772	7.0782	6.5618	6.83978	6.95094	7.74481	7.29671	6.67236	6.19377	6.1848	7.07177	5.62821	7.2313	6.83836	7.05195	6.6005	6.81216
7894773	3.26415	2.90291	3.15316	2.86566	2.98039	2.89832	3.14355	3.10307	2.84989	3.14585	2.81684	3.15926	3.31309	2.76257	2.89475	3.37544
7894774	9.10324	9.65508	9.03525	8.96181	9.19919	8.87376	9.99622	9.55595	8.42977	9.76298	9.1571	9.44086	10.1501	9.87941	9.03789	9.3367
7894775	5.21253	4.66944	4.40082	4.12372	4.4741	4.01653	5.22779	4.77291	3.90571	5.05445	4.75751	4.51885	4.87883	4.21434	4.74367	4.21391
7894776	5.28803	4.15918	4.05973	4.2497	4.41066	3.83784	4.30692	4.33959	7.32476	4.24942	3.10917	4.17075	3.58917	3.66301	4.17805	5.09594
7894777	4.78544	5.5192	4.6914	4.69536	5.34486	4.77529	5.18603	5.5146	4.22434	5.56777	5.07673	4.86809	5.24317	4.90648	5.44475	5.1126
7894778	3.48491	3.74181	3.63896	3.65011	3.65643	3.51805	4.5111	4.37843	5.2705	4.01888	3.51685	3.81287	3.88025	3.99461	3.65892	3.41456
7894779	10.8046	9.06254	9.43787	10.2846	11.1187	10.6222	10.5016	10.4247	9.5739	10.2767	10.0148	10.405	8.91648	10.4242	10.5135	9.9829
7894780	3.52644	2.87945	3.60215	3.30935	3.1423	3.13842	3.15642	3.63221	2.71513	3.41819	3.403	3.33635	3.31097	2.94108	4.20773	3.54649
7894781	3.23291	2.9714	3.41534	3.04397	3.0791	2.96051	3.38047	3.3608	3.05755	3.09478	3.50525	3.07895	3.36617	3.08873	3.14918	3.70175
7894782	4.18809	4.3644	4.46957	4.37211	4.68519	3.70931	3.97019	4.33076	6.11904	4.16967	4.79523	4.45989	4.31391	3.98234	3.71586	4.9806
7894783	5.25937	3.95016	4.89466	4.45133	4.99548	4.08724	5.42644	5.15253	3.56277	4.4237	3.53325	4.739	4.66395	5.05011	4.37694	5.73883
7894784	8.42948	7.32409	7.2319	8.15063	8.55154	7.9926	7.99284	8.35137	6.84705	8.23539	7.89752	7.76583	7.00627	8.21937	8.30368	7.49541
7894785	2.81882	2.94323	3.01145	3.01634	2.98494	3.11909	3.29178	2.9473	3.3659	3.10941	2.84034	3.03443	3.01809	3.14367	3.16362	3.0386
7894786	2.81891	2.7296	2.85648	2.86999	3.32767	2.86634	2.81068	2.98815	4.17143	2.73476	3.11915	3.12036	2.90494	2.91334	2.95464	3.06147
7894787	10.986	8.65908	9.43914	10.5766	11.3265	10.8652	10.8755	10.7404	9.5399	10.7411	10.0539	10.493	9.18287	10.7585	10.7459	9.60017
7894788	6.35857	7.10466	6.47794	6.83118	6.25607	6.94002	5.91898	6.40249	6.10234	6.15093	7.70476	6.20983	6.4194	7.09409	6.32382	6.91329
7894789	11.1491	9.58445	10.0069	10.9345	11.6374	11.3269	11.0372	11.1634	10.4293	11.1013	10.736	10.9634	9.73074	10.9826	11.0507	10.5034
7894790	9.42609	10.1452	10.2003	9.94166	9.88249	10.0067	9.36604	9.3258	9.66268	9.57319	8.31261	10.2933	9.53421	9.39623	9.66908	9.878
7894791	5.61667	5.16429	5.43139	5.587	5.01252	5.9807	5.9225	5.36588	4.81623	6.15398	6.00367	5.14382	5.76583	5.36222	5.68212	5.68457
7894792	3.31403	3.33735	3.55924	3.40241	3.32932	3.72369	3.89896	3.09046	3.96946	3.71268	3.20418	3.55175	3.24014	3.56958	4.01714	3.30581
7894793	3.66248	3.26446	3.50724	3.49473	3.87284	3.63712	3.55238	3.82725	3.11651	3.81976	3.40993	3.62519	3.31165	3.39839	3.21661	3.29524
7894794	2.69012	2.77471	3.08334	2.66837	3.10926	2.91855	3.32585	2.83978	3.25788	3.22791	2.70342	3.11816	2.64995	3.08988	2.87104	3.10394
7894795	5.05308	4.7125	5.15813	5.21732	5.84937	5.45563	5.32389	5.6844	5.93202	5.25725	5.28346	5.50017	5.22404	5.06119	4.65818	4.49768
7894796	8.86513	8.701	8.80085	8.38192	5.3097	8.52026	8.8365	9.0951	7.68386	9.19981	9.28458	8.89643	9.36243	8.84999	8.56628	9.04885
7894797	2.9486	3.0358	3.17091	3.00667	3.54048	3.24305	3.21562	3.13746	3.85426	3.18097	3.36171	3.92267	3.13406	3.4529	3.06685	3.26717
7894798	10.6685	9.98201	10.3998	10.5792	10.7752	10.485	10.979	11.1901	10.0936	11.0019	10.7491	10.7354	10.7434	10.7927	10.8243	10.91
7894799	11.0692	8.91631	9.6566	10.7575	11.2489	10.9164	10.8198	11.0994	9.89844	10.9344	10.3457	10.5991	9.3085	10.7891	10.7399	10.1636
7894800	6.47626	5.43883	5.61641	6.31806	7.02841	6.10235	5.90069	5.92564	5.99349	6.5394	6.1869	6.75999	5.25075	6.41942	5.87094	6.21818
7894801	7.68679	7.03304	7.68277	7.75934	7.40979	7.1214	7.99836	7.02208	6.9923	8.33076	7.10075	7.17601	7.91447	8.13737	8.01908	7.40728
7894802	5.41355	5.34783	5.70384	6.13216	5.99761	5.33504	6.41601	5.27467	5.47954	5.90852	5.30794	5.41208	5.28365	5.89777	5.49057	4.92302
7894803	8.75556	6.47081	7.74456	7.99585	7.76624	7.73156	7.66513	8.33628	7.09404	7.04664	6.90227	7.93475	6.78948	7.52817	7.65017	8.12358
7894804	5.07258	5.11444	5.48114	5.28398	5.52777	4.96447	5.04924	5.33469	4.90942	6.70915	4.78991	5.49257	4.73821	5.5038	5.86277	5.69882
7894805	4.12258	4.92215	5.51235	5.13725	4.8987	5.33466	4.81391	4.7994	4.11707	4.96696	3.62524	5.5082	4.5293	4.32984	5.37914	5.43522
7894806	10.6891	10.2909	11.0334	11.1522	10.6241	10.8533	10.361	10.5398	10.5863	10.2794	10.6896	10.7699	10.5298	10.6579	10.8093	10.9005
7894807	4.60486	4.50845	4.34016	4.57407	4.7244	4.17045	4.67941	4.74714	4.29789	5.05697	4.30845	4.04731	4.19816	4.51575	4.74532	4.51438
7894808	11.3457	10.9515	11.5468	11.5048	10.7934	11.2419	11.1179	11.1911	11.1137	11.1549	10.6988	11.3446	11.3061	11.4484	11.3852	11.2746
7894809	7.53832	8.2789	7.86461	8.04562	8.37132	8.34404	8.73228	8.33274	7.06773	8.79496	6.74465	8.14919	7.91878	7.54308	7.79452	8.95558
7894810	4.97583	3.54497	4.33053	4.09331	4.32341	3.91736	4.30043	4.48343	3.9376	5.32495	3.50732	4.40305	3.78248	4.11171	4.58661	5.06236
7894811	5.09522	4.67317	4.68294	4.40228	4.66387	5.33955	4.39061	5.16891	4.91642	4.84511	4.35809	4.72709	4.301	4.7768	5.17137	4.71029
7894812	6.09617	3.42937	3.92631	4.54051	5.21152	5.35838	5.45229	5.2008	6.4268	5.97811	4.83287	4.87094	4.38954	5.9069	5.59194	4.91911
7894813	8.09797	8.54444	8.85903	8.25547	8.44262	8.38013	8.56543	8.16504	8.65721	8.80216	9.71002	8.97289	8.99396	8.7783	8.31098	9.01622
7894814	4.32704	4.00516	4.16252	4.22449	3.9239	3.85927	4.304	4.43792	3.53349	4.25211	4.16538	4.04215	4.02608	4.26383	4.22133	3.70793
7894815	4.67418	4.0112	3.93501	3.56594	3.89529	4.05898	4.54045	4.18944	4.35135	4.01694	3.30828	4.20678	3.24605	3.92221	4.51493	4.17227
7894816	3.49885	2.87019	2.95378	2.97351	3.05733	3.00207	3.45615	3.29491	3.47239	3.25841	2.92043	2.82902	3.08565	3.07979	3.35836	3.5766
7894817	9.42175	7.15309	8.14462	9.11983	9.77653	9.25341	9.00577	9.04411	7.70515	8.58713	8.74534	9.07358	7.86556	9.12795	8.96575	8.52026
7894818	5.0956	5.51345	4.55326	5.61044	4.91446	6.08395	5.41955	5.35582	4.76863	6.04917	8.24971	6.04486	5.17234	5.67171	5.12264	5.88319
7894819	6.30006	5.57068	6.20037	6.36057	7.55747	6.54628	8.05543	7.17956	5.77263	7.64428	6.55142	6.98489	6.35155	6.65257	7.40984	6.95809
7894820	6.88241	6.45544	5.96064	5.79073	6.42451	5.44004	6.31888	6.5495	6.69775	6.24748	4.73468	5.86347	5.94347	6.21402	6.36536	5.2556
7894821	3.9168	5.04714	5.43112	5.57882	4.65549	4.64141	4.79263	3.91915	4.62584	4.98926	4.85761	4.75016	4.71647	5.29693	4.58788	4.80496
7894822	6.81572	6.35985	6.45417	6.54254	6.58612	6.6941	6.30095	7.51483	6.35702	6.96518	7.79637	6.77723	6.46794	6.38269	6.87321	7.07824
7894823	4.42121	5.02527	4.18353	4.4318	4.48715	4.83612	4.46568	4.18339	3.97036	5.02187	5.82289	4.83955	4.0904	4.51903	3.99455	4.5395
7894824	8.30951	7.53051	8.16794	8.31172	7.39922	7.90254	7.82741	7.84676	9.72279	7.71159	7.69252	7.92993	8.20255	8.42849	7.86812	7.90841
7894825	4.82722	3.67658	4.46379	4.25319	4.95352	4.7216	4.7581	4.71291	4.86325	5.41318	3.36861	5.18982	4.64222	4.53562	4.89248	4.72731
7894826	9.41691	9.8631	10.1201	9.63733	9.45473	9.73493	9.96502	9.04744	9.81953	9.24478	9.04018	10.0933	10.0875	9.99955	9.32288	9.60807
7894827	7.16315	7.07667	7.50256	6.88942	6.85114	7.78907	7.00249	6.27127	8.04869	7.32611	7.26538	7.84923	7.96488	7.37162	7.11428	7.13696
7894828	3.68089	3.47808	3.33808	3.12918	3.35279	3.20255	3.60464	3.10852	2.71966	3.28573	2.85792	3.51565	3.18845	3.05588	3.48797	3.54433
7894829	3.11891	2.70762	2.71869	2.90599	2.82183	2.96938	2.98469	2.97264	2.58879	3.09867	2.71149	2.8213	2.6761	2.8353	2.76966	2.80131
7894830	7.00732	6.21645	6.48572	6.39988	6.59256	7.23826	6.78427	6.95472	6.19046	7.10701	8.03291	7.0702	6.62132	7.16087	6.91192	7.29251
7894831	6.87651	3.78744	4.76456	5.06663	6.65702	5.98362	6.62155	6.06141	4.4726	7.30982	4.83293	6.90924	4.89649	6.70798	5.60682	5.08331
7894832	6.04299	5.5379	6.18691	5.81357	6.54301	4.89431	5.57781	5.68651	5.62869	5.92885	3.21029	5.61733	5.5311	5.10584	5.94412	5.64056
7894833	6.47288	6.72971	6.8136	6.33636	6.43799	6.12876	7.36749	6.55482	6.30993	6.78594	6.88612	6.48177	6.47782	6.58272	6.33279	6.2984
7894834	6.99689	7.34785	7.79195	7.34858	6.99733	7.88391	7.453	7.57042	8.11961	6.90697	7.00885	8.45911	8.10666	7.20725	7.09457	7.77554
7894835	4.22242	4.04028	4.17247	4.01395	3.93303	3.62828	4.05732	3.75354	4.45775	4.15979	4.91959	4.10352	4.16347	4.08734	4.35539	4.07762
7894836	7.16987	5.25042	6.41102	6.82812	6.50779	6.77121	6.77295	6.79974	6.20381	6.25611	6.45535	7.18102	6.44707	7.08007	6.89081	7.29732
7894837	8.17475	7.1352	7.39439	7.19882	7.61319	7.06558	8.17427	7.55232	6.25152	7.92862	6.92397	6.97617	7.59061	8.15983	7.98591	7.42938
7894838	8.58292	9.60995	9.456	9.4183	9.19714	9.41017	8.98138	8.17216	9.09438	8.49673	9.44318	9.09709	9.2112	8.94797	8.83551	8.67894
7894840	8.23194	5.8703	6.54974	7.3995	8.57434	8.17428	7.76762	7.99263	6.97747	7.80554	7.59275	7.76712	6.27707	7.92849	8.02647	7.20363
7894841	4.27065	3.37911	3.96936	3.66182	4.02698	3.85345	3.61305	3.47342	5.22657	4.34322	3.72024	3.84628	3.60943	4.40896	4.41395	3.69643
7894842	5.69587	5.45419	5.43826	5.32783	5.2811	6.04312	6.30426	5.95019	5.83565	5.49477	6.47051	5.607	5.52781	5.76628	6.03315	5.84876
7894843	4.56849	3.81847	4.66561	4.52973	4.33421	4.55871	4.11615	3.92714	4.35536	4.24866	4.05121	4.09601	4.18057	4.90944	4.50728	4.34967
7894844	6.7809	7.3063	6.74428	6.36904	6.12374	6.15313	6.83318	6.47667	6.35326	7.24618	5.86573	6.74904	7.15019	6.95416	6.67986	7.3537
7894845	10.1015	9.36488	10.5187	10.4553	9.80496	10.1139	9.95322	9.70584	10.135	9.97595	10.5373	10.4939	10.3945	10.1384	10.1817	10.0393
7894846	9.98043	10.195	10.0967	10.0542	9.84511	9.84197	9.89581	10.1123	9.33019	10.0589	10.02	9.68082	9.90034	10.1045	10.346	9.43777
7894847	3.05961	3.31736	3.29075	3.05827	3.22936	3.16095	3.06277	3.41338	3.1046	3.52857	4.17852	3.36587	3.18908	3.07292	3.21117	3.01972
7894848	6.74262	6.74058	7.27013	6.93895	6.73531	6.20041	7.15813	6.58785	6.56305	6.81871	6.99836	7.33943	7.27607	7.18586	6.89559	6.90284
7894849	5.84563	6.07013	6.08957	6.34121	5.69946	6.09911	5.92788	5.77074	6.23701	5.86555	6.28256	5.9538	5.90191	6.27277	5.96155	6.47844
7894850	6.80328	5.18475	6.00615	6.79378	7.56275	6.2056	6.12146	5.38744	6.7488	6.53875	4.29818	6.45864	5.85392	6.26926	7.00644	6.85619
7894851	6.37749	6.12368	5.61938	6.32362	6.87905	6.02484	7.1531	6.72673	5.26114	6.60696	3.77983	6.21826	5.61312	6.03999	6.4606	6.04725
7894852	5.56244	3.67972	5.08476	5.9996	7.0551	7.07557	6.93261	6.39741	4.77463	7.33992	6.19738	6.96292	5.99327	6.75767	6.36627	6.87362
7894853	8.36763	7.75777	7.68562	8.03734	8.53549	7.92846	7.60086	7.87913	6.85556	7.23639	7.73492	7.44864	7.54944	7.95368	7.99688	7.42374
7894854	9.77792	9.29136	9.4754	9.83463	10.2272	9.83839	9.46706	9.36062	9.07954	9.45818	9.70092	9.69199	9.34363	9.6422	9.48834	9.97959
7894855	3.63082	3.00689	2.84806	3.23691	3.0142	3.14817	3.30572	3.29759	3.97256	3.60183	3.49586	3.04389	3.34873	3.12815	3.05537	3.238
7894856	5.65628	5.33982	5.79862	5.96878	5.61864	5.31982	5.40338	4.97228	5.51866	5.12918	6.04652	5.53917	5.83521	5.66582	5.27718	5.9531
7894857	3.42646	3.34177	3.14639	3.44156	3.26193	3.40007	3.11356	3.26371	4.38709	3.58572	3.62165	3.36601	3.28783	3.59957	3.46773	3.35104
7894858	11.3458	11.7517	11.3853	11.2382	11.3131	11.2383	11.5722	11.3859	10.6065	11.5243	11.1086	11.589	11.4825	11.4939	11.3574	11.6088
7894859	4.24702	4.01954	3.75127	4.05941	4.30459	4.11109	3.91593	4.23185	4.07535	3.93287	3.39965	4.67895	4.03953	4.41884	4.34538	4.19436
7894860	7.58083	7.61047	8.44006	7.98313	8.01716	7.92948	8.15811	7.62074	7.55369	8.70896	8.04467	8.29597	8.51541	8.14354	8.28579	7.83558
7894861	6.63959	6.49517	5.91348	4.93991	6.28967	6.43442	7.43201	6.79755	5.61019	6.27961	5.85378	6.67538	5.98714	6.55373	6.62908	6.63987
7894862	5.43911	5.38733	5.61088	5.83809	5.45044	5.85154	5.38464	5.57439	5.82868	5.53091	6.58836	5.75257	5.65933	5.75437	5.30227	5.80915
7894863	5.94277	5.2516	5.18796	5.82775	6.02569	6.11629	5.36741	5.15363	6.38681	5.43545	6.25292	5.45366	5.18359	5.52356	5.8763	5.28146
7894864	6.16201	5.78163	5.98716	5.79185	5.82316	5.59228	5.01406	5.74878	8.09249	5.72539	5.73959	5.85717	5.82413	5.72952	5.63711	5.43666
7894865	5.44626	5.94049	5.77572	6.78057	6.17291	5.51895	5.90197	5.76964	7.77236	5.74461	5.54954	5.84883	6.19821	6.22332	6.04618	6.08832
7894866	8.76713	7.54058	7.15733	7.06377	8.36071	7.83187	7.98959	8.41354	7.21324	7.94745	7.77602	7.81108	6.8681	7.79359	7.96937	7.36328
7894867	3.1739	3.65246	3.42578	4.27093	3.50716	4.33324	3.21187	4.05288	6.70125	3.99082	4.37316	3.21708	3.25595	3.43844	3.52393	3.44515
7894868	3.38393	2.98957	3.18669	2.98186	3.19243	3.54051	3.60572	3.23324	2.99356	4.34051	3.22756	3.72035	3.26409	3.26753	3.40364	3.85382
7894869	8.4111	6.77794	7.2755	7.30898	7.01954	8.12196	7.93274	7.55518	7.24735	7.40601	5.94277	8.23231	7.11402	7.75486	7.92334	8.06485
7894870	4.14459	3.93329	3.88616	4.63274	4.72074	4.63507	3.89408	4.38395	5.56433	5.04739	5.99327	4.76659	4.3429	3.90489	4.23866	5.05579
7894871	5.62458	4.78001	5.51226	5.3745	5.77082	5.30165	5.97854	5.1639	5.45645	5.89028	4.66838	6.23806	5.16323	5.2122	5.50477	6.11307
7894872	9.91023	8.50668	9.10995	9.77638	10.1747	9.98749	9.51517	9.70219	9.07807	9.8414	9.13733	9.47197	8.50852	9.70926	9.7721	9.18413
7894873	10.201	10.4606	9.97761	10.2347	9.96526	10.4045	10.4282	10.5728	9.25664	10.0257	8.97449	9.81322	9.65141	9.71617	9.96305	10.4556
7894874	2.92369	2.99469	2.9653	2.83876	3.09381	3.26406	3.01478	3.34676	3.72032	3.01705	3.05077	3.04808	3.43604	3.18764	2.88543	2.97239
7894875	4.2085	4.15001	3.90992	4.96108	4.4398	4.70495	4.04067	3.98987	3.63214	4.56965	4.43404	4.64185	3.95968	4.3959	3.74903	3.96946
7894876	6.61209	6.55391	6.3622	5.69406	5.96858	6.60027	8.11435	6.98443	6.50718	6.03823	3.48934	7.09609	6.14787	6.25218	7.20096	7.29036
7894877	7.14843	7.14223	7.64811	7.80676	7.21004	6.23304	7.3306	7.17685	6.30999	6.96648	5.6924	7.1526	7.09292	6.96207	7.32759	7.49563
7894878	11.4111	11.599	11.6753	11.786	11.6542	11.7754	11.3526	11.1852	11.4056	11.3298	11.3862	11.5946	11.5327	11.4835	11.6791	11.7171
7894879	4.16558	3.59849	3.74863	4.0438	3.82623	3.85857	3.95294	3.87319	3.86089	4.49171	4.02146	4.86123	3.73198	4.2875	4.78056	3.76803
7894880	6.95469	5.92222	5.97802	6.18245	5.7111	6.95374	6.44939	7.05441	5.93063	6.55755	7.71196	6.66621	6.39666	6.39676	6.46251	7.06544
7894881	4.96441	4.932	5.10102	5.25347	4.96842	5.19199	4.84698	5.07103	5.31349	5.00057	5.75239	5.2155	5.12259	5.1882	4.86323	5.22097
7894882	4.73731	4.09161	4.1645	4.56878	4.75561	4.85578	4.63501	4.8697	3.33754	4.86097	5.08024	4.18445	4.32492	4.73821	5.06335	4.61104
7894883	7.02835	5.42613	6.16329	6.29859	6.31402	6.2443	6.88795	6.67588	5.81099	6.55182	5.70715	6.75471	6.36279	6.86092	6.47352	6.51591
7894884	7.07338	7.01134	7.16331	7.2086	7.0808	6.60054	7.0307	6.82027	6.75606	7.66199	7.13168	6.3925	7.4591	7.54353	7.35772	6.69821
7894885	6.46356	5.38526	5.83386	6.34258	6.60591	6.37888	6.59017	6.49296	5.57581	6.52482	6.04414	6.35217	5.79024	6.49685	6.73913	6.25153
7894886	6.28671	5.9625	5.20212	5.73606	7.3096	6.07997	5.87775	6.37266	6.78497	5.43892	4.29412	5.73028	5.04	5.36923	6.02402	6.6126
7894887	2.69036	2.61852	2.72232	2.67463	2.71799	2.71919	2.94526	2.64895	2.82139	2.74036	2.73715	2.60442	2.64473	2.9301	2.91217	2.48082
7894888	6.12451	4.63775	4.87544	4.81096	4.55575	5.03185	5.65664	5.28118	4.82331	5.19656	4.94018	4.60831	5.0835	5.50543	5.26496	5.32514
7894889	9.92002	9.44904	9.61839	10.0221	10.2722	9.76309	9.4948	9.75014	11.865	9.80412	9.93755	9.7951	9.35559	9.85086	9.74686	9.75876
7894890	8.98576	8.5382	8.65148	8.97989	8.29309	8.31934	9.19608	8.98614	7.98405	8.86837	8.59402	9.01924	9.21346	9.25845	9.08861	8.72798
7894891	7.26245	7.53011	7.4246	7.66371	7.87898	7.23097	6.73093	7.32435	9.57981	7.37171	7.75521	7.47007	6.9974	7.54026	6.7972	7.96331
7894892	3.79716	3.85063	3.88169	3.95874	3.85519	3.94908	3.78816	3.84328	4.08366	3.8338	4.36223	3.91172	3.95131	3.93332	3.75604	3.9727
7894893	4.3563	3.66493	4.29973	3.93449	4.07722	4.43762	4.14134	3.75791	4.13172	3.57568	2.71308	4.59237	3.42262	3.51446	4.29816	4.76073
7894894	6.7092	7.1737	7.14671	7.37864	7.88697	7.2804	6.09614	6.73443	7.65552	6.99927	7.29733	7.33206	6.87124	7.29572	6.75824	7.33711
7894895	3.90179	3.1093	3.28125	3.41092	3.1673	3.98608	3.48095	4.28871	3.37719	3.52026	3.01341	4.02343	3.96039	3.60976	3.93192	3.24246
7894896	10.1175	10.0614	10.2905	10.2792	10.4243	10.2786	10.14	10.2791	9.53779	10.3825	10.2722	10.2046	10.3633	10.3542	10.3152	10.1344
7894897	4.34601	4.59676	4.27304	3.91761	4.70609	4.04328	4.60671	3.97911	5.68034	4.39875	4.74987	4.55753	4.47667	4.65033	4.39837	4.74306
7894898	4.96251	4.26197	4.44961	4.18197	3.45935	5.28714	4.27859	4.77276	4.90331	4.43301	5.88571	4.71319	4.33433	4.38035	5.19839	4.4131
7894899	6.54454	4.47623	4.4409	3.67853	3.58936	4.4718	4.94981	5.73115	3.47853	4.56001	3.39249	4.73157	3.71966	4.70659	4.18959	4.49158
7894900	7.44543	5.82783	6.08099	5.66019	6.64248	7.20279	6.87369	6.87958	5.31084	6.87421	5.02656	6.97576	5.99822	6.54581	6.70373	7.01045
7894901	7.4886	7.16301	7.53749	7.3295	6.69091	7.20868	7.61373	6.6644	6.80766	7.11491	5.76459	7.6836	7.47558	6.92785	7.35008	7.56728
7894902	4.12725	2.69589	2.90737	2.78191	3.49253	3.64591	3.81404	3.14861	3.13278	3.77169	2.83271	4.14813	2.91449	3.05227	3.54744	3.38024
7894903	8.79722	8.60785	9.18791	7.78535	8.26152	8.64015	8.96351	8.96695	8.58369	8.67076	8.74454	8.78648	9.23224	9.23367	8.45001	8.95562
7894904	3.27813	3.34398	2.98034	3.07037	3.13689	2.8258	2.80795	2.88518	2.99149	3.11421	2.82287	2.83205	2.91585	2.8405	3.1063	2.92368
7894905	5.18562	4.97768	4.78425	4.66842	4.6087	4.51637	4.4092	4.63294	4.59164	5.03946	4.3746	4.60694	4.62879	4.67591	4.93847	5.90629
7894906	7.07835	7.08452	7.61051	7.29816	7.42696	7.47803	7.05465	6.46604	7.32041	7.09663	7.41952	7.78782	7.84686	7.39009	7.63385	7.16614
7894907	4.47011	5.33631	4.79614	4.29637	4.82484	4.61048	4.6744	4.2569	4.06081	5.45763	4.57973	4.38403	4.73451	4.30481	4.50177	5.24772
7894908	9.97961	10.6588	10.8683	10.4384	10.9179	10.8239	10.1396	10.3691	10.6347	10.5189	10.6375	10.8715	10.3362	9.99971	10.3559	10.673
7894909	12.1041	11.8834	12.0221	12.068	12.3113	12.019	11.9594	11.8992	12.3549	11.9974	12.2389	11.9125	12.0124	12.1499	12.0142	12.0723
7894910	4.62953	4.56702	4.18781	4.30923	4.21402	3.7495	3.54151	4.91621	4.52637	4.7784	4.02877	4.51763	3.59172	3.98926	3.88655	4.56105
7894911	3.4499	5.80865	4.18271	3.95986	4.40264	3.61946	4.7327	3.66072	5.50108	4.60753	3.09875	4.46563	4.31362	4.26716	4.49562	5.12691
7894912	6.79577	7.29318	6.34367	6.15079	6.67453	6.75729	6.83984	6.73063	4.46346	7.03667	4.53527	6.93879	6.89354	6.7292	6.5199	7.17691
7894913	3.27774	3.39073	3.385	3.72469	3.43327	3.02648	3.38494	3.26458	3.5624	3.18478	3.49521	3.60027	3.91341	3.44423	3.27591	3.66465
7894914	10.3341	9.50921	10.5566	10.6526	10.2672	10.4767	10.1496	10.3328	9.68338	10.576	10.5845	10.4495	10.7038	10.5593	10.6076	10.1343
7894915	3.96429	3.64435	3.72214	3.70133	3.61765	3.82975	3.92723	3.54423	5.11909	3.14568	4.26193	3.70459	3.77557	3.98297	3.78061	3.37599
7894916	8.66009	9.7447	9.66535	9.47309	9.80253	9.15111	10.5678	9.72523	8.50199	10.0472	10.3236	10.2964	10.3413	10.2324	9.02863	9.64773
7894917	7.20813	6.40874	6.42008	6.69958	6.49588	6.36925	7.0344	7.23632	6.99828	6.76169	5.64003	6.59992	6.35017	6.56995	6.89652	6.8447
7894918	4.05371	3.58884	3.65341	3.84805	3.71632	3.90446	3.87248	3.7446	2.6992	3.47221	2.81911	5.05273	3.36354	3.54387	3.60052	3.3058
7894919	7.95104	8.8855	8.38422	8.26314	8.90975	7.94746	8.7667	8.77259	7.7973	9.10168	8.05835	9.28314	8.85019	8.33275	8.43868	8.73419
7894920	3.55939	3.27475	2.84382	3.38336	3.69838	3.69746	3.8971	4.29123	5.6731	4.67597	3.54483	3.84009	3.78904	4.36749	3.58426	3.42372
7894921	3.66337	3.36251	3.57151	3.20743	3.96942	3.41886	3.67254	3.35345	3.68365	3.52422	3.17955	3.57027	3.63961	3.58997	3.31872	3.56244
7894922	3.20874	2.81328	2.76583	3.28384	3.9138	3.13704	3.06759	3.26733	4.85355	3.24008	4.08544	3.49229	2.98696	3.10572	3.47981	2.89333
7894923	3.09611	2.75223	3.05743	2.998	3.19473	3.06342	2.81983	3.25938	2.91577	2.99077	2.70793	3.04131	3.04385	3.03873	3.18123	2.93927
7894924	3.25511	3.1413	3.20668	3.11918	3.15575	3.36028	3.52301	3.14509	3.76432	3.19254	3.01156	3.18164	3.37132	3.14071	3.79713	3.15653
7894925	6.28596	3.76992	3.78968	3.3559	4.50698	4.72872	4.46383	4.63793	3.83222	5.99863	3.15798	5.06343	4.5002	4.80985	5.11795	5.3957
7894926	9.11981	9.17645	9.64642	9.758	8.85345	9.70502	8.64217	9.18328	8.58823	8.70367	8.76178	9.38219	9.46132	9.64452	9.50041	8.92351
7894927	5.85495	5.63434	5.90339	6.09735	5.45061	5.96196	5.82147	5.34312	5.9561	4.88844	4.44713	6.26633	6.14947	4.91177	5.55082	5.78417
7894928	4.94773	3.84204	4.29315	4.14396	4.33967	4.58342	4.33887	3.94729	3.21754	5.14013	3.41822	4.40658	4.21278	3.91196	3.94994	4.71703
7894929	2.96764	2.76017	2.96221	2.7299	2.68659	2.67836	3.07432	2.72549	5.59805	3.14821	2.71205	2.96052	2.82783	2.977	2.85673	2.69738
7894930	5.21361	3.83506	4.03929	4.17537	4.37965	4.4515	4.35575	5.10558	4.1453	4.62047	4.98086	4.58789	4.4679	4.39308	4.33937	4.79145
7894931	4.23046	5.45063	5.09065	5.22661	5.44667	5.06806	4.86876	4.80998	4.81471	5.28511	4.84389	5.81201	4.53391	4.97495	4.98535	5.79515
7894932	3.89649	4.26781	4.24686	4.02741	3.62152	3.87526	3.82643	3.98889	4.7394	4.0997	4.67753	4.09474	3.92622	3.79406	4.08934	3.81973
7894933	5.89025	5.14712	5.34586	5.14408	5.23143	5.1329	5.36228	5.63519	4.19002	5.62215	5.1138	5.17476	5.40776	5.45186	5.68722	5.63941
7894934	9.38559	8.2931	8.51945	8.89216	9.39691	9.06912	9.00084	9.03719	9.94308	9.08345	9.09803	8.85832	8.92582	9.25114	9.05189	8.93533
7894935	4.62571	3.18585	4.57017	4.52699	4.11083	5.53525	5.95915	4.57677	6.2941	4.98452	3.54724	6.6503	4.07161	5.65149	5.14177	4.54257
7894936	3.75832	3.14284	3.65216	3.32835	3.58898	3.47448	3.89096	4.0029	3.47734	3.16555	3.30119	3.59595	3.46506	3.50266	3.74311	3.55103
7894937	5.24998	7.38685	4.71911	4.51846	6.47405	4.08314	6.22667	5.22258	3.7649	5.25136	3.04168	5.44232	5.50783	4.86665	6.33311	5.67437
7894938	5.25548	4.79606	5.3274	4.78537	4.53457	4.324	4.6666	5.16438	3.95319	4.9162	3.61425	5.69371	5.27075	4.88017	4.58712	5.32391
7894939	6.03673	6.42672	6.64964	4.69391	6.29129	5.90699	6.85224	6.01719	5.26435	6.73842	3.54331	5.98636	5.78071	5.72115	6.73702	6.21446
7894940	6.38137	7.80336	7.13577	5.86802	7.5149	7.1716	7.31253	7.32632	6.43713	8.67995	5.44582	7.13784	7.78148	7.12913	7.35277	8.10207
7894941	11.6588	10.2087	10.7414	11.5699	11.9544	11.7286	11.5646	11.5407	10.7091	11.3442	11.2201	11.2991	10.2918	11.4676	11.597	11.1279
7894942	3.16969	3.11838	3.16909	3.01728	3.28895	3.14838	3.2807	3.06086	3.09076	3.97425	3.81009	3.78504	3.22437	3.20128	2.98001	3.31487
7894943	3.8423	3.25709	3.13002	3.00763	3.01338	3.45321	3.68175	2.97503	3.46122	3.64182	3.01297	3.11327	3.14794	3.24489	3.34693	3.35668
7894944	3.74632	3.82661	3.57704	3.83319	3.67225	3.50607	3.61501	4.07053	6.69306	4.21535	3.72784	4.25903	3.61953	3.28887	3.30702	3.67568
7894945	7.16086	7.17107	7.7268	8.08451	8.00096	7.85483	6.81616	7.55032	8.10865	7.57157	8.34413	7.80355	7.40894	7.70068	6.72962	7.71151
7894946	3.62286	4.24843	3.96169	3.2697	3.46844	3.19111	4.60225	3.62106	4.17102	4.84156	3.05793	3.37468	3.835	3.06884	3.71531	4.43568
7894947	5.68798	5.57612	6.13581	6.05771	6.39156	5.44535	6.42368	5.60449	6.41584	7.06498	5.20987	6.35509	6.42213	6.35633	6.30225	6.42535
7894948	4.89281	5.74217	5.58499	4.84965	6.78502	5.04057	5.15038	4.68218	5.1419	5.37513	2.9119	5.09031	5.98685	4.14173	4.69066	5.73602
7894949	5.0485	3.22469	4.42226	4.49854	4.12001	4.37045	4.12073	3.39724	4.63763	4.18479	2.97454	3.68969	4.44628	4.15064	4.76603	4.29498
7894950	8.58463	9.09892	8.80487	8.86091	8.55336	8.74416	8.11643	8.34194	7.61888	8.05299	7.57136	8.92477	8.21992	8.07681	7.85703	9.2412
7894951	11.0843	11.3871	11.2367	10.9467	10.9203	11.1499	10.8114	10.742	10.5336	10.8733	10.4389	11.2491	10.8678	10.8915	11.1137	11.1513
7894952	7.54415	5.91722	6.35775	6.01533	6.77718	6.19813	7.29055	7.28641	5.61078	7.30601	6.49851	6.74436	6.8444	7.21048	7.02399	6.34799
7894953	3.98532	3.13702	3.59312	3.97376	4.56701	3.65315	3.98968	4.00779	3.68123	4.68678	3.64695	3.90228	4.08324	4.02973	3.98439	3.77906
7894954	6.34636	6.04136	5.7627	6.02483	6.22524	6.39472	5.98285	6.46423	6.27909	6.20513	7.62613	6.37201	6.20295	6.29662	6.66746	6.52206
7894955	8.83103	8.35915	8.07301	8.29036	8.7515	8.30959	8.99654	8.87063	7.22384	8.83093	8.29236	7.99089	8.22226	9.02089	8.86084	8.61324
7894956	4.22468	3.69232	3.58317	3.51683	4.01063	4.17421	3.77553	4.20913	3.63318	4.77217	4.05645	4.48985	3.36936	3.37049	3.88653	4.61756
7894957	4.9073	5.9846	6.02674	5.86408	6.46592	6.60304	6.79012	5.89002	6.29812	7.15098	6.28521	6.93698	5.85091	5.90031	6.07434	6.48317
7894958	3.06545	4.37316	4.43949	5.07792	5.11826	5.18053	2.92636	3.7774	3.52171	5.07865	3.58521	4.67475	4.42501	3.99357	3.76477	4.91911
7894959	4.2109	3.98454	3.79929	3.75692	4.09172	3.84453	4.88098	4.31063	4.91039	3.98693	3.73008	4.03224	3.72995	4.02425	4.06791	4.02504
7894960	9.74754	7.12974	7.92485	9.3707	10.0988	9.5825	9.41021	9.28842	8.27756	9.23963	8.51523	9.36328	7.69344	9.2668	9.30857	8.47641
7894961	7.30064	5.40738	5.41735	7.11502	7.43099	7.04359	6.97036	7.40255	5.75675	7.35352	6.56666	7.23505	6.09339	6.85505	7.30341	6.68992
7894962	2.49958	2.48658	2.51334	2.53106	2.66467	2.57834	2.55003	2.75912	2.57822	2.50529	2.50992	2.57786	2.624	2.53562	2.63968	2.5649
7894963	7.72292	6.24289	6.70612	6.87627	7.94189	7.37733	7.61711	7.87482	6.05332	8.13536	7.08294	7.66254	6.97862	7.5716	7.44024	7.29255
7894964	8.36436	8.86416	9.0245	8.50748	8.63838	8.65251	8.38512	7.64524	7.87947	9.00999	7.15649	9.192	8.31777	7.77082	8.66144	9.15796
7894965	6.19863	5.19907	5.26958	5.8507	6.34426	6.07355	5.85648	6.19189	6.20826	5.80018	5.53546	6.09234	5.28347	6.21161	6.40759	4.92588
7894966	2.94387	3.10085	3.00215	3.11754	3.73939	3.21939	3.44757	3.12194	3.1087	3.21749	2.93871	3.42915	3.04926	3.37362	3.60245	2.83364
7894967	3.46082	3.1445	3.1479	2.96232	3.46249	3.26535	3.66299	3.42351	2.99433	3.66508	2.67418	3.25415	2.87184	3.15365	3.17048	3.58706
7894968	7.84524	8.22313	8.22623	6.31159	7.5637	8.0509	8.905	7.5741	8.10624	8.86466	8.15285	8.66771	8.6482	8.16203	8.31651	8.31604
7894969	7.18937	7.02698	6.75689	6.86706	6.83006	6.62441	6.95735	6.37689	6.46901	7.04749	7.08481	6.44274	6.54481	6.89889	7.02692	7.00942
7894970	12.3278	12.0139	11.8797	12.1337	12.1012	12.1598	12.2769	12.1827	12.4771	11.7833	11.6621	11.8198	11.7687	12.0486	12.1296	12.208
7894971	9.8839	9.81501	10.1875	9.83271	10.006	9.65507	10.0436	9.92089	7.86452	10.5024	10.3699	10.0379	10.9261	10.6244	10.4681	9.76096
7894972	7.39695	4.76881	5.6161	5.75853	5.27584	5.44844	6.10085	6.33453	5.65559	5.32142	4.65102	5.00915	5.87015	6.03603	5.95309	6.36554
7894973	8.02132	5.95694	7.59247	8.33394	9.17995	7.87288	7.97433	7.42352	8.00525	8.70064	6.58963	8.47359	8.29749	8.20292	8.25614	8.5246
7894974	7.85346	8.24455	7.80342	7.6241	6.76822	7.83469	7.69381	7.40136	6.3736	7.41084	7.51959	7.75711	8.31359	7.56798	7.29905	7.82757
7894975	7.0688	5.44315	5.51194	6.47501	7.48018	7.02604	6.58908	7.08838	5.6301	6.844	7.81783	6.82122	5.22373	6.9565	6.75758	6.37113
7894976	7.94816	8.07608	7.74544	8.11972	8.28957	7.91309	7.66571	7.82787	7.6911	7.91523	7.08092	7.68482	7.9118	7.72429	7.88118	7.65982
7894977	7.2569	5.87163	7.3504	7.20685	5.82751	6.6058	6.35043	6.86628	7.1667	6.52131	6.73516	7.07772	8.29367	8.42156	6.82236	6.28127
7894978	7.25449	8.14929	7.59335	6.85171	7.59177	7.35654	8.07781	7.26516	7.86765	7.85029	8.12633	7.87755	8.30595	7.96911	7.76146	7.68579
7894979	11.2402	9.87183	10.1412	11.2448	11.6309	11.4411	11.1792	11.2827	10.562	11.015	11.0215	10.978	9.69021	11.0935	11.2275	10.9579
7894980	7.14575	7.01341	6.53535	6.733	6.89794	6.75274	6.82441	6.90519	6.45858	7.17971	6.62208	6.59	6.84786	7.11384	7.16874	6.74793
7894981	4.47249	4.05597	3.80492	4.45735	3.91077	3.81326	4.5974	4.22716	3.49506	5.28023	5.48471	3.95878	4.01681	3.94009	4.71443	4.45553
7894982	9.52063	9.75505	10.0394	9.50834	9.59376	9.34068	9.8476	9.69733	8.08655	10.5071	10.7196	10.1322	10.6756	10.2825	10.0931	9.89301
7894983	2.97853	2.94249	2.77864	2.71704	2.85852	2.70121	3.23347	2.95839	3.29088	2.79104	2.94571	2.86941	2.86388	2.9068	2.86248	3.04508
7894984	9.5805	9.07296	9.1886	9.15289	9.50989	9.52633	9.37395	9.83326	8.31935	9.66046	9.57247	9.5522	9.07628	9.21213	9.78458	9.81337
7894985	4.66648	5.0217	4.80389	4.40982	5.45029	5.05255	4.46015	5.08966	5.12117	4.84696	4.29184	5.22342	4.67191	4.8477	5.09395	5.34957
7894986	6.04217	5.71121	6.4524	6.081	6.70256	6.16547	6.00407	6.49857	6.27269	7.01918	6.08608	6.6781	6.79225	6.46885	6.12426	6.91479
7894987	5.10774	4.03363	5.56699	5.23255	5.38147	4.67809	4.82607	4.72748	4.7077	4.64106	3.66157	5.98772	4.34729	4.68664	5.41972	5.42296
7894988	8.85085	8.41741	8.7122	9.09263	9.36525	8.75468	8.13332	8.57905	9.02276	8.60174	9.06864	8.5161	8.59978	8.80805	8.7023	8.94679
7894989	3.78264	3.37389	3.54042	3.16256	3.54035	3.2464	3.61594	3.56906	3.78361	3.36522	3.72077	3.40602	3.86866	3.40437	3.25029	3.48783
7894990	11.1509	11.5002	10.9949	10.8581	11.1061	10.9035	11.6307	11.2861	9.69531	11.4435	11.6118	11.088	11.6338	11.6798	11.4918	11.0756
7894991	11.9729	11.7843	12.007	12.0494	12.2119	12.057	11.5325	11.7465	11.6041	11.6251	11.9523	11.4811	11.8425	11.8122	11.7771	11.6462
7894992	8.51477	8.21236	8.11868	8.36262	8.74651	8.31712	7.90262	8.2944	8.05552	8.36693	8.20041	7.95813	7.947	8.38615	8.2006	7.83751
7894993	4.60174	5.02113	4.45035	4.33373	5.25823	4.53148	5.17894	4.99593	4.94664	5.76432	4.27612	4.74728	4.60062	4.51907	4.788	4.91021
7894994	6.05087	5.73321	5.42118	6.05814	6.25491	6.05939	6.1002	6.0643	6.24901	6.34235	5.78167	6.30735	4.92821	5.94563	5.98061	5.5688
7894995	6.41292	5.45365	6.41462	6.45407	5.77648	6.07607	6.04972	6.44289	6.12096	6.32057	5.81014	6.87542	6.25137	6.34071	6.57733	6.71907
7894996	4.67207	4.24075	4.99821	3.88475	4.04558	3.93511	4.66065	4.21702	4.30958	5.29245	4.39359	4.79408	5.02088	4.23598	4.52698	5.26247
7894997	3.68172	2.99145	3.74205	3.46032	3.77007	3.58712	4.18462	3.77334	4.59225	3.78981	2.94567	4.12459	3.61656	3.90477	3.63982	3.57915
7894998	3.50914	3.50983	3.52516	3.57455	3.4865	3.55466	3.40897	3.50443	3.8022	3.51819	3.79824	3.5603	3.54745	3.55265	3.48826	3.60731
7894999	11.6786	11.8999	11.7233	11.3965	11.4296	11.5488	11.9193	11.793	10.7483	12.0004	11.7112	11.8707	11.8627	11.6683	11.578	12.0201
7895000	8.60583	7.81567	8.05784	8.56138	8.81406	8.2749	8.38631	8.20057	9.74846	8.11593	7.05072	8.39884	8.18935	8.51607	8.2773	8.32169
7895001	9.24443	10.3257	8.83431	9.08421	9.36987	8.64693	9.79278	10.1307	7.92334	9.82153	9.20781	8.99248	9.2167	9.55171	9.05283	9.38607
7895002	4.73763	4.18865	4.28498	4.34416	4.40578	4.70057	4.86883	4.35376	4.33365	4.94578	4.33313	4.76726	4.08467	4.38597	4.52408	4.70854
7895003	8.95595	9.3534	9.51502	9.13268	9.08124	9.27351	9.10195	9.07225	8.79291	8.9745	7.87934	9.56128	9.13877	9.07997	9.41356	9.32467
7895004	9.55654	7.8203	8.31439	9.34798	10.2706	9.61679	9.2774	9.3115	8.52722	9.19904	9.15567	9.24097	7.63529	9.40589	9.40882	8.60828
7895005	8.04435	7.43322	7.65659	7.69007	7.50595	7.73121	7.77885	7.86841	7.0183	8.0218	7.12401	7.32224	7.96212	8.0038	7.91528	7.31607
7895006	3.96455	3.41418	3.95839	3.97523	3.74578	3.58346	3.7517	3.41957	4.55094	4.41605	3.83815	3.97323	3.72416	3.84301	3.98931	3.8773
7895007	7.01387	6.1201	5.83343	6.96572	8.06903	7.36228	7.13445	7.39909	6.20639	7.2553	6.70054	6.75647	5.72587	7.12352	6.85422	6.1199
7895008	6.00034	4.24845	6.03212	5.60839	5.55345	5.3538	6.09484	5.01871	4.18609	5.51902	5.12123	5.2945	6.53151	5.99735	5.53916	5.48792
7895009	10.7105	8.61391	9.21756	10.2279	10.9457	10.375	10.366	10.4283	9.13794	10.23	9.92867	9.91714	8.66374	10.2904	10.2206	9.47571
7895010	3.03095	2.78838	2.91587	2.79809	2.63472	2.96601	3.2989	2.71688	8.14144	2.91491	2.77262	2.91023	3.01025	2.99814	2.82269	3.02651
7895011	7.88715	3.99191	5.71595	6.46871	7.39564	6.59887	7.09805	7.05609	5.49861	7.63383	5.31535	6.79374	5.87424	7.16837	6.90274	5.9636
7895012	11.351	11.4909	11.27	11.2193	11.2932	11.4724	11.396	11.3461	11.3648	11.2362	11.1729	11.4484	11.1787	11.3455	11.3627	11.5784
7895013	3.82146	3.57927	3.45662	3.74488	3.40522	3.92947	3.9458	3.68875	4.0851	3.72694	4.1766	3.8719	4.30953	4.01133	3.7345	4.1041
7895014	9.33969	9.49076	9.62266	9.1879	9.41446	9.19294	9.4004	9.32295	8.66423	9.13595	8.02681	9.47252	9.27672	8.87786	9.7444	9.15496
7895015	5.90836	4.81117	4.78035	5.06625	5.17761	5.4903	5.01755	5.03471	5.49983	5.7075	5.50611	5.29381	5.17651	5.35551	5.32605	4.82658
7895016	9.56281	9.12344	9.52747	8.57322	8.67397	9.77203	9.5976	9.51204	9.50059	9.58674	8.64704	9.89347	10.0843	9.92595	9.71123	9.91478
7895017	12.1014	12.3502	12.5211	12.4456	12.352	12.4552	12.0838	12.1599	12.2501	12.2897	12.2389	12.5092	12.5104	12.2048	12.377	12.4527
7895018	6.20582	6.63033	7.42499	6.81507	7.12176	6.09701	7.31656	5.53078	6.82822	7.89547	7.67795	7.84763	7.81245	7.25547	5.45517	6.58208
7895019	8.76594	7.15759	7.74725	8.01659	7.82375	7.90501	7.86527	8.48239	5.81744	8.05403	6.88456	7.74664	8.58755	8.30118	7.19382	8.50634
7895020	10.2067	9.14212	9.74136	10.084	10.3849	10.0259	10.0098	9.9781	9.55528	9.77783	10.189	10.0562	9.34928	9.90435	9.89409	10.3664
7895021	4.01318	4.14532	3.99488	3.61203	4.14786	4.86983	5.03692	4.96052	4.13867	4.01247	5.77515	4.53208	4.33547	4.44567	4.2636	4.79782
7895022	6.90124	5.80974	6.78616	5.72762	6.9172	7.00042	6.23917	6.41058	7.33915	7.52141	6.91695	7.2256	6.66893	7.09523	6.85149	7.74609
7895023	5.05028	5.28339	5.52099	5.8103	5.77558	5.61255	4.55775	5.4416	7.02503	5.52234	6.32841	5.12298	6.21676	5.59465	5.03925	5.81434
7895024	6.80631	5.81348	6.52362	5.54546	5.55964	5.97005	6.28911	6.19507	5.59216	6.13584	4.38043	6.66224	6.08901	6.58556	6.39885	6.81352
7895025	3.61307	3.16726	2.9502	3.20226	3.36094	3.01204	3.04292	3.54676	3.85652	3.13372	3.11646	3.07506	3.38004	3.54192	3.82083	3.04456
7895026	7.95786	9.22943	8.10149	7.61415	7.6861	7.99619	8.99201	7.90991	6.88332	8.50444	7.74617	8.34968	8.38138	7.28267	8.18219	8.82014
7895027	6.82988	4.61406	4.87014	5.87252	7.34045	7.34899	7.39605	5.91031	6.24129	7.42909	5.59506	7.02549	4.24515	6.77079	7.44405	5.93747
7895028	4.50198	3.55159	3.74743	3.69332	3.69097	3.67062	4.16539	4.0613	3.76972	3.96026	3.52936	3.58574	3.68969	3.5856	3.68553	3.94056
7895029	4.05153	3.47624	3.49488	3.15563	2.95966	3.17472	3.64277	4.95938	2.96569	3.45987	2.85634	3.38401	3.47624	3.06191	3.853	3.64729
7895030	6.39724	4.6154	5.29572	4.4636	4.29207	5.13241	5.7607	4.82533	5.42897	5.72453	4.37903	5.76862	4.53623	5.1755	5.38838	6.60538
7895031	6.06883	6.12577	6.88258	5.70016	5.32403	7.05801	6.67648	6.12241	7.47382	7.15868	5.62608	7.5326	8.00748	6.98074	6.78806	6.55488
7895032	9.31565	8.77811	9.37312	9.21713	9.05662	9.08198	9.65302	9.24002	9.21293	9.11192	8.71067	9.12846	9.76154	9.40796	9.19526	9.14912
7895033	8.45689	7.54897	8.33379	8.23846	8.65961	7.78455	7.82364	7.53632	7.67548	7.74377	8.54512	8.14316	8.64594	8.29006	7.05179	8.13353
7895034	7.36938	6.57595	6.40282	6.74252	6.81729	6.35282	7.13717	7.71059	7.27087	7.33181	6.50842	6.66534	7.07338	7.26913	7.18363	6.55739
7895035	4.46821	3.31191	4.03127	3.92837	5.2245	4.39398	5.3981	4.42403	4.04601	4.42641	3.30261	4.99124	3.56537	3.78931	4.38078	4.70933
7895036	8.7062	8.89808	9.58999	9.23722	8.93276	9.13616	9.43777	9.29868	8.94426	10.1321	9.87088	9.81427	9.38836	9.67622	8.71556	9.69525
7895037	8.6315	9.82237	8.93778	9.00148	9.55948	9.35173	9.53495	9.02884	8.17216	9.77084	8.30581	9.11638	8.92562	9.0443	8.73442	9.86799
7895038	8.83988	8.52649	8.95082	8.89161	8.55349	8.83888	8.8532	8.96126	8.85732	9.23746	9.06381	9.36016	9.64436	9.33464	9.39591	9.15071
7895039	10.3516	10.0365	10.493	10.6203	10.232	10.3705	9.96459	10.0355	9.85775	10.0024	9.92994	10.0011	10.5686	10.1804	9.28917	10.1559
7895040	4.24477	4.0652	4.74713	4.25245	4.28551	4.37341	4.98447	4.8204	3.70821	4.70917	4.14872	4.66123	4.63482	4.64203	4.4852	4.50399
7895041	4.51348	4.80478	5.52798	5.48753	5.30746	4.77429	4.39651	4.5469	4.40753	4.51238	4.54114	4.90556	4.523	4.9548	4.8837	4.89658
7895042	10.7417	11.1308	11.072	11.0035	10.7648	10.6581	11.1598	10.6914	10.5352	10.877	10.6046	10.6028	11.0048	10.9386	10.8294	10.9378
7895043	2.68773	2.65943	2.58669	2.55612	2.53106	2.7177	2.56999	2.93657	2.83516	2.50391	2.91003	2.63005	2.5767	2.67698	2.52912	3.69879
7895044	6.70296	6.23453	6.74518	6.57501	7.09204	6.63543	7.56358	7.19161	5.86291	7.33063	5.17618	7.45973	6.56724	6.32515	7.16284	7.21055
7895045	9.02852	9.69354	10.0638	9.62457	9.95727	9.1559	10.4362	9.40841	9.10612	10.7333	10.3589	10.009	10.697	10.4715	9.10219	9.45088
7895046	7.05972	7.49596	6.99797	7.30346	7.6924	6.9231	7.77297	8.17474	7.22812	7.59076	7.10548	7.10182	7.131	7.21613	7.33224	7.77396
7895047	9.99494	8.27036	8.90652	9.74231	10.5159	10.0931	9.70506	9.77959	8.78656	10.04	10.0415	9.92885	8.56011	9.90873	9.78538	9.06
7895048	4.01146	3.45388	3.66266	4.51987	3.57732	4.04434	4.18679	4.41973	3.71177	3.36997	4.03851	4.20359	4.79708	4.23878	4.76273	4.23808
7895049	4.64737	4.66963	5.12779	4.70805	3.69655	4.72206	4.55098	4.56435	4.61142	4.58836	4.38283	5.14048	4.68078	4.69384	5.06328	5.0269
7895050	6.12448	6.73452	6.92172	6.9444	7.23621	6.87892	5.78461	6.16413	6.90597	6.57196	7.30922	6.52367	6.49372	6.93124	6.18676	6.88564
7895051	4.45886	3.60271	3.6007	3.39565	4.47042	3.72514	5.22752	4.87692	4.17501	5.38262	3.33036	4.04888	4.08987	3.98086	4.83547	4.14903
7895052	10.6495	11.0906	10.7091	10.6468	11.0149	10.5726	10.9394	10.9808	10.6546	11.3645	10.5551	10.6351	10.6635	10.9844	11.1409	10.8116
7895053	4.73123	4.22576	4.87118	3.88852	4.35482	4.33631	5.00913	4.21786	4.07986	4.78629	3.91514	4.9094	4.52671	4.90769	4.80956	5.54535
7895054	8.69841	7.99115	7.94399	8.1764	7.36102	7.53302	8.40619	8.49187	7.23497	8.71272	8.68308	7.56462	8.8297	8.79759	8.09111	7.97281
7895055	10.2628	10.5301	10.8622	10.4907	10.5916	10.4069	10.62	10.5146	10.1231	10.4565	9.80394	10.563	10.7817	10.5664	10.6153	10.3817
7895056	8.33047	8.50698	8.82131	8.57948	8.10666	7.83874	8.41878	7.80797	8.08986	8.79973	8.91974	8.23608	9.14314	8.85605	8.49132	8.16358
7895057	11.2477	11.479	11.7465	11.5868	11.6226	11.7791	11.5626	11.371	11.4274	11.3652	11.5052	11.7326	11.5964	11.5534	11.7169	11.6055
7895058	2.66725	3.20451	3.0902	2.96279	2.79711	3.21429	2.7716	2.72549	4.79936	3.01076	3.18104	3.1646	2.89802	3.00631	2.88249	3.33665
7895059	4.20009	3.71524	3.80959	3.93206	3.85066	3.91481	4.2376	4.33022	4.96141	3.68144	3.7302	3.57549	4.51235	4.60295	4.51903	3.98838
7895060	6.11688	5.93976	5.74968	5.27934	5.74994	4.76797	6.89446	6.02343	4.74676	6.88901	4.76936	5.45742	5.72702	6.36876	6.12951	5.24502
7895061	4.98848	4.20211	4.09889	4.37381	4.79479	4.77522	4.92836	5.00466	5.6514	4.97655	4.40419	5.24371	4.86757	4.93805	5.10014	3.86927
7895062	9.11315	8.82755	9.19078	8.84538	8.9455	9.39108	8.53118	8.85351	8.285	9.11405	8.58555	9.30077	9.18351	8.87091	9.05907	9.24661
7895063	8.65684	7.47801	7.99123	8.61455	8.87696	9.05525	8.77603	8.71212	7.869	9.03379	7.54929	8.63636	7.58338	8.60859	8.43647	8.31367
7895064	3.16177	2.82001	3.09189	2.99332	3.09146	2.86302	2.89594	3.02602	3.31409	3.5433	2.89725	3.40065	2.68278	3.06152	3.14349	2.84007
7895065	4.06477	3.60925	3.81563	3.18778	3.83535	3.15021	3.96946	3.61254	3.52698	3.55201	3.08717	3.61887	3.12651	3.21386	3.54131	4.21136
7895066	6.54778	7.26431	6.35765	6.28058	6.23943	6.00693	6.75113	6.30946	6.05515	6.64886	4.8036	6.64418	6.63959	6.88226	6.10642	7.07728
7895067	8.20362	8.05082	8.16398	7.81662	8.13401	8.20589	8.60826	8.55483	7.2915	8.46874	8.37699	7.96711	9.10248	8.43532	8.05299	7.9109
7895068	9.01587	9.10487	9.1113	9.39847	9.88709	9.1202	9.66284	8.80762	8.52121	9.22484	8.20187	9.58662	9.18394	9.19796	9.16385	9.1143
7895069	8.97085	9.61261	9.00332	9.03778	8.98372	9.13002	8.92327	8.93723	8.39134	8.97499	7.2653	8.7978	8.28633	8.58393	8.67256	9.09207
7895070	10.2258	7.82094	8.72892	10.0994	10.715	10.2626	10.3027	10.3961	9.19112	10.3658	9.49998	9.7222	8.13455	10.2183	10.2063	8.91438
7895071	2.69603	2.87169	2.72265	2.79745	2.73199	2.86616	3.20919	2.80779	2.7451	2.68711	2.73929	2.76926	2.72539	2.74808	2.82644	2.688
7895072	10.2394	9.96706	10.2629	10.2966	10.1666	10.2338	10.6149	10.0563	9.648	10.8279	10.6411	10.2221	10.1893	10.4516	10.3051	10.435
7895073	5.69689	6.02562	6.2965	6.39709	6.64885	5.88157	6.61404	6.5473	5.98656	6.82817	5.75042	5.86164	6.58849	6.64947	6.67136	6.77306
7895074	8.41378	6.63511	6.75945	6.62291	6.76434	6.90949	7.04876	7.39148	7.33819	7.46321	6.28239	6.9085	7.01442	7.33597	7.1434	6.58913
7895075	5.1779	4.32086	4.4141	4.27443	4.94437	4.4584	5.98212	5.2854	3.91311	4.67585	3.61837	4.30431	4.64541	4.20714	5.33787	4.97971
7895076	3.30143	3.13668	3.10808	3.17524	3.094	3.29729	3.20877	3.27737	3.75709	3.39069	2.92968	2.99418	3.185	3.20471	3.07873	3.18788
7895077	9.94367	10.753	10.4503	10.116	10.141	10.1344	10.3428	9.94755	10.4625	10.8603	10.486	10.4861	10.427	10.4222	10.3694	10.3367
7895078	3.13346	3.1601	3.1326	3.15914	3.11747	3.1824	3.13507	3.18895	3.38856	3.17181	3.30608	3.14753	3.21551	3.1418	3.14439	3.17591
7895080	7.11165	5.24299	5.90746	6.06602	7.51504	5.85972	6.54553	6.64762	5.51898	6.82547	5.51663	6.60285	6.09064	6.26043	6.96786	5.90958
7895081	5.41857	7.18746	7.97786	6.93717	6.875	7.15686	6.99399	5.75219	5.87088	6.76985	6.2959	7.57158	7.3514	7.20231	6.27191	7.02455
7895082	10.3958	10.8664	11.2118	10.7735	10.9095	10.568	10.9552	10.4656	10.6797	10.6276	10.5125	11.1548	10.951	10.4055	10.2619	11.1781
7895083	3.48883	3.45769	3.5068	3.6163	3.47455	3.79281	3.80641	3.60311	5.66771	3.52138	3.43527	3.79553	3.44188	3.8375	3.77759	3.57678
7895084	9.24653	8.96536	9.55154	9.55004	8.70182	9.28953	8.82905	9.11298	8.97663	9.16469	9.44355	9.23609	9.54376	9.49182	9.29784	9.11342
7895085	4.11826	4.06753	4.50701	3.73845	4.10381	3.57588	3.86571	3.50246	4.48027	3.36737	3.48332	4.70524	4.17251	3.93532	3.97811	3.51162
7895086	3.78395	3.53862	3.62826	3.7914	3.34855	3.48824	3.80092	3.60675	3.56176	3.71568	3.48864	3.70983	3.67381	4.13534	3.9381	3.53895
7895087	7.87941	8.06344	8.51293	8.05085	8.05734	7.97815	8.09913	7.52465	6.861	7.95327	7.67289	8.29357	8.13496	8.08113	6.91618	7.69586
7895088	10.4069	10.6133	10.2891	10.3488	10.933	10.4671	10.7423	10.3802	9.65668	10.4543	10.5301	10.7232	10.4104	10.6558	10.5139	10.5197
7895089	9.87657	10.0781	10.1979	9.98401	10.0707	9.91715	9.97258	9.82295	8.70138	9.78794	9.54552	9.96078	9.99368	10.2587	9.5383	9.51918
7895090	8.13623	7.51943	8.71396	7.406	7.74283	8.34316	8.20982	7.93441	8.82125	8.52993	8.67125	9.24643	9.12415	8.74164	8.3108	8.45016
7895091	6.77679	7.37503	7.25806	7.34692	7.23749	6.61353	7.33359	5.94565	7.83439	6.76182	5.48515	6.98237	7.10166	7.03791	6.8423	6.00981
7895092	3.77997	2.81327	3.18265	3.28525	3.45893	3.80674	3.90839	3.41559	3.92409	3.33099	3.25888	4.50993	2.85598	3.57922	3.26411	3.66583
7895093	5.56234	5.6982	5.98713	5.16275	5.36427	5.01028	5.77567	5.68069	5.7543	6.14266	4.61006	4.97915	5.80443	5.3458	5.43745	5.74011
7895094	8.98089	8.65081	8.98306	8.91671	8.74381	8.77567	8.35548	8.56551	7.69177	8.34124	7.16147	9.03481	8.45991	8.10282	7.94034	9.36131
7895095	7.49383	7.21325	6.4436	6.62118	6.94318	6.90805	7.59627	7.76152	6.43749	7.33323	6.62791	6.99148	6.16016	6.80684	7.44489	6.97298
7895096	7.97081	6.68769	7.92184	7.98768	6.83362	7.54521	7.46861	7.76739	7.18789	7.15965	7.28949	7.62172	8.28877	7.01679	7.5628	7.26265
7895097	6.39724	4.6154	5.29572	4.4636	4.29207	5.13241	5.7607	4.82533	5.42897	5.72453	4.37903	5.76862	4.53623	5.1755	5.38838	6.60538
7895098	8.06533	8.7931	8.28421	8.16457	8.2561	8.4458	8.35158	8.39162	6.93847	8.29508	8.21132	8.13241	8.42775	8.22046	7.94044	8.34353
7895099	4.88803	5.42781	5.30325	5.15712	6.4329	3.60551	5.07129	4.61817	4.21906	3.90261	3.88738	4.76659	4.37919	4.12904	5.56433	3.82013
7895100	11.5897	11.5878	11.6356	11.6231	11.6947	11.5025	11.1133	11.3831	11.8489	11.1462	11.3998	11.0057	11.4291	11.2985	11.419	11.6857
7895101	10.8118	11.2253	10.9801	11.0696	10.86	10.9351	10.9408	10.2266	10.7802	10.4018	10.5078	10.6337	10.7622	10.6401	10.5401	10.3856
7895102	2.86877	3.10018	2.97332	3.02907	3.13475	2.99349	3.00745	3.16883	3.66979	3.35654	2.93867	3.02433	3.04264	3	3.04743	3.46875
7895103	8.04491	5.40885	5.54236	6.64249	7.41311	7.08882	7.14123	7.7602	5.44988	7.88736	5.4397	6.64101	6.86061	7.31635	6.87549	6.76188
7895104	7.20207	7.0277	6.96488	6.84488	7.18845	6.55382	7.12559	7.03247	5.97113	6.52514	7.15029	6.97902	6.74344	6.07255	6.60404	7.42798
7895105	9.80195	9.8899	8.77365	9.03283	9.43907	9.03438	9.22156	9.36028	6.48262	9.4647	8.38786	8.60919	8.37462	8.76872	9.56606	9.66784
7895106	8.25138	6.89334	7.0926	8.70541	8.32384	7.73102	7.74469	8.2212	6.39464	7.91756	7.86118	7.5648	7.61568	8.12351	7.80439	7.29668
7895107	5.08052	5.37901	5.71433	5.75189	5.87172	4.94732	5.3903	4.9402	7.0129	5.35068	5.86616	5.31164	5.34039	5.75834	5.81118	5.67337
7895108	3.03684	3.03112	3.09263	3.1869	2.99505	3.18132	3.34891	2.91002	3.31449	3.19644	2.83367	3.30784	3.25918	2.83835	2.93113	3.02585
7895109	3.4483	3.10396	3.53219	3.30322	3.44654	3.37984	4.12921	3.81314	4.17881	4.01184	3.30685	3.35789	3.48663	3.46648	3.41109	3.80742
7895110	11.3952	10.9444	11.6257	11.5547	10.9966	11.2368	11.1077	11.2469	10.9622	10.9894	10.9775	10.9801	11.433	11.471	11.5129	10.9854
7895111	4.00628	2.97115	2.78109	3.012	3.09685	3.2669	3.83239	4.40332	4.10699	3.2014	3.42452	3.22737	3.54423	3.57652	3.77307	3.13638
7895112	10.0183	10.5255	10.2471	10.0758	10.5181	10.2066	11.0833	10.6144	10.0667	10.7998	10.6565	10.6117	11.176	11.0682	10.1983	10.4512
7895113	7.2242	7.28228	6.9878	7.17146	7.38494	7.30053	7.28229	7.61081	7.25235	7.09953	8.02354	7.60531	7.01048	7.50257	7.2707	7.58639
7895114	4.94296	5.67308	5.7895	6.07691	6.23056	5.23957	5.38013	4.75865	4.85534	4.79397	4.59225	5.01551	4.69152	4.63353	4.77294	5.58464
7895115	7.2598	7.27078	7.44268	7.7742	8.29951	7.64021	7.21312	7.19907	6.5105	7.14877	7.0987	7.21468	6.84724	7.40493	7.31757	7.36854
7895116	6.85358	5.12328	5.61514	5.54161	6.61832	7.3042	6.8514	6.63386	6.82121	6.96983	8.24074	6.87169	5.80491	6.61807	6.20843	6.38704
7895117	6.3966	4.88074	5.57562	6.03638	6.3041	5.65936	6.77006	6.50734	6.39063	6.12092	4.00656	5.84736	6.06332	5.82749	6.05252	5.70055
7895118	4.93313	4.3096	4.18565	3.55647	3.8494	4.66178	4.57584	4.75714	4.49113	5.3586	5.14681	4.91908	4.02907	4.06997	5.6878	4.59012
7895119	8.5898	9.01231	9.43484	8.87614	9.21752	8.45208	9.27699	8.57792	8.48516	9.71753	8.22457	9.52964	9.59653	8.87242	9.26312	9.1958
7895120	3.06742	2.6348	2.62692	2.66698	2.68014	2.65144	2.85023	2.82207	2.90781	2.69157	2.83475	3.14414	2.68463	3.17612	2.7242	2.65492
7895121	8.0421	8.91496	8.05492	7.83635	7.96879	7.72673	9.11239	8.70085	7.65966	8.65711	7.96892	8.26155	8.5031	8.62005	8.06978	7.78677
7895122	10.7312	10.9958	11.2244	11.0441	11.0504	10.4142	11.1321	11.1266	10.6043	10.8995	10.4809	11.1655	11.1555	11.0058	11.0629	10.8907
7895123	8.22748	8.62361	9.21827	8.63663	9.41115	8.3837	8.6099	8.39362	8.74178	9.36328	8.6999	9.7893	9.05781	8.75157	8.59511	9.36123
7895124	5.42852	3.76365	4.37207	5.07757	5.97603	5.73016	5.65047	6.31257	4.06736	6.26673	3.91648	5.84937	3.71348	6.11849	4.26463	4.06415
7895125	5.79586	4.12048	5.05588	5.08743	6.02326	4.58067	5.49748	5.26622	4.94872	5.28623	4.62663	5.22781	5.20361	4.97418	5.63841	5.86602
7895126	8.77895	7.41881	8.12974	8.76003	9.36688	8.67044	8.29757	8.62103	7.42903	8.35559	8.74633	8.27003	7.61918	8.47211	8.73452	7.78781
7895127	3.12363	2.93509	3.0813	2.93839	3.10006	3.14574	3.16379	3.19845	6.17531	2.95356	2.97966	3.15326	3.02606	2.98762	3.20644	3.12879
7895128	3.18475	3.29646	3.39607	2.83765	3.16946	3.85471	3.17105	3.59543	4.80923	3.30553	3.53116	3.49965	3.23392	3.41418	3.46521	3.60963
7895129	6.27869	4.92385	4.80061	6.08175	6.77682	5.95968	6.20532	5.78589	6.53942	5.93885	5.60267	5.91545	4.56488	6.41546	5.78233	5.28779
7895130	9.37709	7.00746	7.77571	8.89039	9.90255	9.53401	9.0022	9.141	8.55721	9.15779	9.42653	9.21937	7.56313	9.27001	9.05654	8.64737
7895131	5.98738	4.48749	5.22186	5.27618	5.46972	5.06455	6.59597	5.47085	3.89427	6.66147	4.62844	5.59335	5.34295	5.30404	5.42865	5.44517
7895132	3.16913	3.14106	3.79542	3.14224	3.67426	3.32984	4.20459	3.51089	5.25628	4.92536	3.02806	3.59868	3.00663	3.41897	3.7245	3.33307
7895133	9.14012	8.92206	9.59393	8.86089	9.01946	9.21544	9.58484	9.31262	9.2783	9.07937	9.25224	9.60092	9.83105	9.40969	8.43903	9.27592
7895134	5.25416	4.44993	4.67772	4.39159	6.12173	5.6709	5.33424	5.29447	3.91156	4.80125	4.81777	5.37023	5.18284	4.84822	5.73738	5.09069
7895135	4.77667	4.18548	4.67597	4.49845	4.77131	4.65753	4.81813	4.82591	4.44504	4.62301	5.03777	4.65075	4.55458	4.64654	4.50988	4.65583
7895136	2.92531	2.9049	3.00461	2.98318	2.76618	2.81622	2.62045	2.93657	8.35718	3.13491	3.23047	2.7716	3.23347	2.95966	2.65778	2.72857
7895137	10.8527	11.3504	10.5506	10.7259	10.9681	10.7957	11.1646	11.0496	10.7041	11.2904	10.9619	11.2149	10.7684	11.2796	11.036	10.8506
7895138	2.95545	2.92672	3.26873	3.01698	3.48989	3.10976	3.03012	3.19989	2.95801	3.18368	2.72422	3.42085	3.3407	2.87699	3.09899	2.90912
7895139	3.87198	3.55957	3.73478	3.80912	3.57404	3.6599	4.01228	4.09194	3.84702	4.09788	3.71376	3.70996	4.03991	3.9593	3.73798	3.64821
7895140	2.76339	2.89976	2.97834	2.66922	3.02454	2.68092	2.96543	2.90411	2.9079	2.62344	2.70493	3.03979	2.78977	2.86497	3.1555	2.93715
7895141	3.85092	3.6076	3.97724	3.71763	3.71962	4.22447	4.02517	3.51806	3.47192	3.65487	4.11788	3.84661	3.6441	4.28447	3.61654	3.63481
7895142	3.7774	3.1646	3.403	3.19827	3.11029	3.83987	2.64743	3.08245	3.31097	2.90108	2.90108	4.85653	3.9246	3.03339	4.3429	3.23426
7895143	6.74288	5.30958	6.11977	7.22255	7.93731	7.60232	6.74932	6.97928	6.13687	6.63069	6.55002	7.37006	4.91743	6.84832	7.03287	6.68979
7895144	9.3765	8.24638	8.58003	9.42513	9.94195	9.73059	9.16324	9.3039	8.81741	9.38865	10.104	9.51121	8.14677	9.46328	9.12835	9.24238
7895145	8.05782	6.68484	7.83934	7.4628	7.46515	7.92583	7.57577	7.71357	9.93281	7.7784	7.90433	8.1807	7.89228	7.85641	8.07834	7.81134
7895146	3.23347	4.09025	4.23194	4.12647	4.04747	3.21429	4.15904	5.04119	2.96569	2.91003	4.55493	4.17886	4.3884	4.3429	4.01039	3.54649
7895147	9.1964	8.52412	9.36924	8.95983	7.72686	8.82162	8.64119	8.77257	9.00432	8.73011	8.41787	9.22898	9.77768	9.63815	8.59426	8.55082
7895148	4.6033	3.51597	4.30791	3.85563	4.63761	4.73279	4.7512	5.45567	4.81883	5.51344	4.79317	5.50619	4.27996	4.28606	5.36788	5.1679
7895149	9.68615	9.38826	10.1468	9.83522	9.79325	10.4131	9.67123	9.729	10.1848	9.79752	9.86911	10.0988	9.83981	9.74787	9.97566	10.1022
7895150	4.03766	3.25427	3.741	3.70529	3.95878	3.19829	4.19897	4.24385	3.17495	4.73574	2.98675	3.80418	3.53167	3.64859	3.75118	3.5815
7895151	4.09025	2.99899	5.00152	3.2697	4.42848	3.15417	5.51512	4.58656	3.96724	4.39881	3.10427	3.97858	4.99476	3.20705	3.5039	6.04796
7895152	3.69178	3.93324	3.97183	3.79232	4.28765	4.24894	4.16282	3.97331	3.13785	3.31867	3.30071	4.30904	3.73796	3.50987	3.95994	4.5765
7895153	7.41501	6.35337	6.78863	6.06627	7.07089	7.80594	7.07313	5.70072	7.79729	7.16711	5.3533	7.85826	7.92216	7.18507	6.936	7.07747
7895154	4.4313	4.52041	4.97362	5.59577	5.8362	5.82236	4.81553	4.47788	11.3083	4.7324	6.54471	5.81349	5.37216	4.61717	5.91968	5.33198
7895155	6.98191	6.459	6.44024	5.61785	6.37843	6.42714	6.6925	6.83374	5.44371	7.18631	4.84744	6.70914	5.99816	6.07908	6.60752	6.53734
7895156	10.6441	8.49768	9.10518	10.0361	10.7028	10.1869	10.2698	10.2865	8.61565	10.1531	9.46326	10.0305	8.65345	10.1156	10.2593	9.35979
7895157	11.5034	11.6487	11.4935	11.2867	11.5302	11.4231	11.6355	11.5464	11.3477	11.386	11.3664	11.4788	11.394	11.4905	11.541	11.4494
7895158	3.2915	3.38069	3.65951	3.55868	4.16499	3.81415	3.40187	3.38149	3.42819	3.48351	4.24673	4.25224	3.80779	3.45568	3.431	3.46881
7895159	4.01089	2.79713	3.19978	3.79843	5.01018	4.08304	4.11454	3.39074	5.11217	4.43519	2.94541	5.24919	3.04484	4.20001	4.35886	3.5944
7895160	9.25598	9.191	10.0725	9.95614	9.59941	9.23375	8.91895	8.72941	9.61254	9.01482	8.59557	10.0453	8.87549	9.01481	9.17581	9.44222
7895161	10.0562	10.483	10.5968	10.1816	9.82935	10.181	10.2027	9.69126	10.2628	9.48884	9.30459	10.5308	10.5978	10.4392	9.88763	10.0275
7895162	8.80209	9.58078	9.22823	9.05253	9.1463	8.45861	9.4796	9.34099	9.24375	10.0253	9.45658	9.26215	9.51838	9.49444	9.46581	8.83767
7895163	5.25042	4.77955	4.37217	4.53288	5.35892	5.15386	5.73164	5.14744	5.97734	5.53288	3.82241	5.31384	4.19651	4.60872	5.47368	4.36222
7895164	4.90831	5.45926	4.36832	5.19098	5.46078	4.87956	5.27569	5.23625	3.08175	5.26723	3.42798	4.92109	4.20869	5.23539	4.13059	4.91519
7895165	9.27298	8.22416	8.41416	8.76119	8.99376	9.13152	8.68675	8.60999	8.11226	8.6815	8.78694	8.69009	8.67695	8.97523	8.77077	8.93511
7895166	3.00878	3.05199	3.09834	2.87005	2.81644	2.92588	3.73779	2.90867	3.67168	2.9664	2.95828	3.14929	2.95854	2.97903	3.01259	3.18372
7895167	5.31725	3.79889	4.49146	4.57299	5.22497	5.2066	4.96369	4.40797	4.61462	5.37351	3.97531	5.85807	4.2318	5.33289	4.38847	4.63687
7895168	7.94425	7.51806	8.05681	7.85179	7.41041	7.37705	8.28045	8.22684	7.48584	8.62236	8.03582	7.74968	8.04413	7.8286	8.17432	8.09431
7895169	6.69444	6.80023	6.75145	7.22821	7.25491	6.44342	5.69656	6.19479	6.55291	6.65448	7.36273	7.05495	6.20213	6.52988	6.19916	6.88226
7895170	11.2132	11.6922	11.5691	11.1123	11.6247	11.4341	11.4445	11.7605	10.8378	11.5689	11.2507	11.6671	11.4356	11.6498	11.7197	11.4433
7895171	10.5632	10.7946	9.62745	9.84398	10.2898	10.0013	9.88138	10.3741	7.8356	10.3984	9.66612	9.48453	9.28932	9.68507	10.3671	10.5122
7895172	5.94665	3.8042	4.70256	5.06829	6.64522	5.72966	6.10808	6.65771	5.14176	6.24248	3.81587	5.44547	5.13041	5.61752	4.79079	5.41449
7895173	5.33228	4.96569	4.91129	5.11419	5.69402	5.51356	5.43525	5.28682	5.08786	5.69473	5.51389	5.16052	5.12565	5.65493	5.94043	4.64693
7895174	6.35909	5.98781	5.81846	6.50237	7.27593	6.37054	6.5079	6.23623	6.07768	6.47582	5.94793	6.0649	5.07571	6.6742	6.29856	5.54269
7895175	4.66025	3.64268	3.90753	3.87308	3.86906	3.68855	4.11449	4.73469	4.86477	4.46155	4.14444	5.16276	4.66574	4.24501	4.17882	3.87499
7895176	6.51618	5.43052	6.03813	6.05432	5.96346	5.67102	6.232	6.07025	5.22506	5.98546	4.7757	6.04583	7.08933	6.76112	5.24994	6.26297
7895177	8.96297	8.45851	8.83691	8.65807	8.55831	8.58103	8.89732	9.20839	8.12718	9.0786	9.22541	8.52719	8.92185	9.20715	8.81733	8.68827
7895178	8.046	6.75938	6.36362	7.24966	8.31053	7.95619	7.85359	7.91872	6.87505	8.0005	8.01218	7.85157	6.58654	7.78059	7.63089	7.54988
7895179	3.3392	3.00425	2.78662	2.76777	3.22593	2.77107	2.86818	3.1479	3.07076	3.03219	2.77409	2.8506	3.09705	2.86727	3.3219	3.21942
7895180	8.72938	8.27088	8.81252	8.95847	8.00132	9.15831	8.38355	8.53823	8.63825	8.106	7.4043	8.78527	8.82945	8.98577	8.89414	8.20899
7895181	5.36487	5.31139	5.83827	5.898	5.14569	5.5909	5.71737	5.81665	5.93824	5.99555	6.81238	6.13548	5.67842	5.70866	5.58296	5.98074
7895182	2.85236	2.73841	3.31002	2.86607	2.90533	2.96026	2.94358	2.73699	2.82599	2.89969	2.57947	3.04751	2.77964	2.72491	2.92622	2.90916
7895183	4.51552	4.19592	4.81552	4.45873	4.66344	4.2587	5.02258	4.55195	4.28649	4.96301	3.67264	4.30605	4.10564	4.17147	4.46757	5.20595
7895184	4.89848	4.54696	4.96216	4.77912	4.76166	4.67777	4.65499	4.48127	4.35556	5.1211	4.63885	4.07026	5.06671	5.13115	5.31848	5.38248
7895185	6.02516	4.30429	5.15706	5.30174	6.90933	6.01874	5.85838	6.11261	5.80553	6.88892	5.15808	5.64056	5.86428	5.81318	5.94171	5.19701
7895186	6.25161	5.80264	5.10522	5.16981	5.52904	4.92115	6.44256	5.47632	5.31329	5.58293	5.24691	4.83027	5.88488	6.26744	5.75002	4.6733
7895187	7.11347	7.40457	7.30913	6.94543	6.24328	6.21713	6.86144	6.59303	7.04721	7.42621	7.07202	6.66581	7.51598	7.24342	6.77068	6.73554
7895188	5.85693	4.49747	5.85597	5.38858	6.2094	5.91997	5.4601	4.80319	6.84335	5.87227	4.16519	6.23739	5.38547	4.79738	5.69589	5.85744
7895189	5.46279	5.12487	5.09974	5.36757	5.37457	5.29217	5.72096	5.01502	6.00119	5.31972	5.0413	5.36565	5.07616	5.32388	5.61167	5.23182
7895190	4.85172	4.41476	4.7752	3.97704	4.40378	4.57988	4.76149	4.58539	4.40949	5.50623	3.99558	4.93912	5.14544	4.99124	5.0182	4.81482
7895191	3.56067	3.33483	3.81637	3.40841	3.97338	3.84534	3.99354	3.98883	3.66756	4.46067	3.42297	4.05988	3.93371	4.12919	3.83411	4.07309
7895192	10.7223	11.336	11.1831	11.1874	11.1427	10.6961	11.2895	11.2772	10.8962	11.4654	11.1043	10.6877	11.2055	11.3537	11.3632	10.68
7895193	9.67822	9.46924	9.36951	9.48131	9.78378	9.47125	9.5533	9.60659	8.26883	9.61146	9.05635	9.50399	8.84836	9.25959	9.63227	9.708
7895194	5.60088	4.70031	5.1801	5.19459	5.40592	6.6282	6.07783	4.60551	5.26866	5.33164	4.52666	6.5792	4.43813	5.69275	5.09701	5.11617
7895195	5.08944	4.47732	4.47791	4.44185	4.5531	4.38421	5.38904	5.30236	4.03667	4.93935	4.44188	4.79185	4.25792	4.62292	4.85987	4.74686
7895196	10.5419	9.14411	9.63347	10.235	10.6831	10.3209	10.5504	10.5953	10.0712	10.6916	10.6771	10.3564	9.28001	10.6842	10.5061	9.9823
7895197	3.40766	3.32915	3.27858	3.31097	3.31728	3.34438	3.31304	3.14773	3.45057	3.61886	3.21999	3.22033	3.2306	2.98308	3.56157	3.22016
7895198	3.41093	3.12224	3.27785	3.48804	3.34959	3.19884	3.3673	3.11831	5.67886	3.75819	3.20315	3.12576	3.47512	3.28561	3.32853	3.03066
7895199	2.6597	2.59355	2.60145	2.56922	2.72717	2.67856	2.95438	2.63014	2.52733	2.70388	2.643	2.60871	2.57386	2.83983	2.60519	2.55008
7895200	3.63178	3.3144	3.70464	3.46904	3.69825	3.42459	4.27021	3.36201	5.2643	3.8507	3.58442	3.74788	3.73198	3.9532	3.45766	3.49113
7895201	3.72551	3.36047	3.47591	3.05151	3.53171	3.64404	3.5307	3.9633	5.11082	3.7651	3.30065	4.19124	3.82406	3.53485	3.43293	4.90725
7895202	6.25767	5.95597	6.23532	5.55022	5.97208	5.49198	6.33066	6.01346	4.87164	6.48121	4.35804	5.92653	5.59488	5.85665	6.57167	6.45221
7895203	8.58088	8.47737	8.90831	8.25282	8.02002	8.69912	8.36116	8.30067	8.23607	8.11433	7.91671	8.4049	8.47526	8.31261	8.96704	8.03967
7895204	3.84177	3.86485	4.06489	3.94749	4.15121	3.84261	4.28675	4.22756	3.70062	4.21627	3.54461	3.60094	3.91169	3.56711	3.69521	3.88973
7895205	5.69269	5.65614	5.71914	5.33807	5.26547	5.75371	5.21398	4.93387	5.73237	5.39973	4.36469	6.24314	5.74044	5.624	5.78036	6.57232
7895206	6.44766	5.37626	5.93267	6.4878	7.11719	5.82282	5.8907	6.25363	4.91504	7.39079	5.6676	6.64736	6.46047	6.89703	5.85812	6.44721
7895207	4.07545	2.90753	3.34537	3.3911	3.69193	3.18655	4.65878	4.80826	3.6697	4.63308	4.66146	3.06568	3.37295	3.85764	3.97727	3.1571
7895208	4.01358	5.25908	4.77935	4.80154	4.91739	4.78132	4.24821	4.08868	3.29446	3.98855	3.77341	4.30819	4.38113	4.24592	4.15802	4.17284
7895209	7.17683	7.76106	6.92599	7.39442	7.39947	7.17143	6.58804	7.65854	5.73566	7.53688	6.5957	7.28726	6.70229	7.073	7.59953	6.94272
7895210	8.9852	8.25398	8.03966	8.65975	9.18073	8.88846	8.50435	9.00981	8.06927	8.93853	9.44512	8.58465	7.95359	8.82927	8.56109	8.59193
7895211	7.84836	8.0713	6.46881	6.89422	9.06884	6.31437	8.88369	7.15246	4.72731	7.70165	4.88217	5.56672	6.77054	7.17477	6.83323	6.86912
7895212	5.01014	3.8288	4.14031	4.4666	4.99367	4.58334	4.8513	5.48709	4.39446	4.74325	5.04486	4.92243	4.66468	4.76141	4.89824	4.56151
7895213	5.92876	5.26975	5.45379	5.36191	5.4006	5.31975	5.19025	5.8729	4.54786	5.75496	5.51397	5.83348	4.54812	5.92385	5.23355	5.53398
7895214	10.1449	9.88646	10.9962	10.8599	10.4096	10.3974	9.83316	9.78701	10.4663	10.3478	10.0499	10.7867	10.452	10.3781	10.383	10.6956
7895215	7.6646	7.51854	7.2599	7.61218	7.33797	7.35245	8.15464	7.82521	7.18109	7.98253	6.62633	6.90364	7.8169	7.85098	7.88065	7.31188
7895216	10.6733	10.5929	10.6407	10.828	11.1281	10.6475	10.3266	10.5337	11.1537	10.4558	10.6978	10.5846	10.3927	10.546	10.6299	10.7847
7895217	5.32937	5.74149	5.51272	5.69158	6.17536	6.04018	5.88438	6.35137	5.30588	6.80077	6.69458	5.95296	5.82111	5.84593	5.59892	6.43158
7895218	2.84841	2.88107	2.78405	3.11021	3.25268	2.79495	2.9557	3.29849	2.97929	3.13892	2.94025	2.92116	2.86192	3.20173	2.84988	2.82173
7895219	7.70277	5.00675	5.8978	6.12936	7.54451	7.07171	7.55437	7.30938	6.24156	7.70902	6.07418	7.43865	5.579	7.37147	7.0916	5.62372
7895220	9.26366	8.87906	8.335	9.08215	8.74806	9.05942	9.15233	9.35933	9.42316	8.64757	8.17845	8.69322	8.42119	8.7775	8.9713	9.10367
7895221	10.3366	9.59102	9.45473	10.4661	9.38198	9.78674	9.48357	10.3006	9.20701	9.89962	10.3003	9.65638	10.4875	10.3756	10.0739	9.80209
7895222	5.54827	4.68591	4.70477	4.91091	5.38205	5.17448	5.56085	5.59834	6.07158	5.85233	5.39926	5.84649	5.68637	5.58046	4.99865	5.08255
7895223	8.79846	6.63228	7.1403	8.29625	8.72816	8.59881	8.34129	8.67393	7.08312	8.51454	7.82085	8.13044	6.50173	8.28567	8.26776	7.44001
7895224	9.06187	8.59152	8.50731	8.97885	9.12415	8.9317	8.28852	8.67089	7.94675	7.84194	8.55446	8.59573	8.12942	8.41841	8.11599	8.67032
7895225	9.76064	9.89717	10.0148	9.58311	9.95792	9.47696	9.9326	9.77653	8.87335	10.4518	10.223	10.2456	10.3184	9.79833	9.85846	10.0787
7895226	10.8631	10.6988	10.9445	10.5801	10.7998	10.6983	10.8395	10.8862	9.9359	10.8637	10.6161	10.8428	10.874	10.7044	11.1051	10.725
7895227	9.49244	9.47678	10.0039	9.74522	9.72952	9.59086	9.6439	9.71522	9.12961	9.35798	9.25174	9.81092	9.95281	9.27217	8.88469	9.8534
7895228	3.93029	3.69353	4.07376	3.93638	3.97824	3.79185	4.4155	4.41717	3.94292	4.00802	3.81319	4.19749	3.98118	3.96057	4.08916	3.67161
7895229	3.53214	3.34522	3.58407	3.30604	4.22506	3.40388	3.72835	3.78038	3.19315	3.80274	3.1555	4.04593	3.15696	3.56793	3.46669	3.42852
7895230	10.7325	9.94431	10.1244	10.471	10.8392	10.4588	10.259	10.4131	11.2353	10.4	10.0631	10.233	10.2099	10.5918	10.4534	10.2496
7895231	8.91788	9.43634	9.89215	8.50242	9.32896	9.68738	9.57092	9.49914	9.64898	9.46851	9.07495	9.70108	9.94632	9.27082	9.32668	8.93689
7895232	6.93633	6.64844	6.63278	6.44297	7.8992	7.07841	7.83287	7.00568	6.78467	8.37481	6.1493	6.86963	7.35842	7.2935	6.45479	7.6423
7895233	7.47891	5.42074	6.38924	7.56634	8.1131	7.06555	7.63069	7.34828	6.8779	7.20733	6.20276	7.50681	5.76075	7.32542	7.44032	6.76944
7895234	4.31806	3.23293	3.69738	3.64725	3.01042	3.15696	4.36214	3.8268	2.93796	3.56289	2.93405	3.82618	3.18373	3.86813	3.40423	3.76547
7895235	7.25481	6.58798	7.05648	7.6646	8.04436	6.85596	6.90067	6.98331	6.56522	7.34911	6.81709	7.11829	6.55228	7.25886	6.98104	6.4262
7895236	3.40285	3.02624	3.03582	3.02919	3.11882	3.1321	3.23685	3.27462	2.89063	3.40589	3.81991	3.50833	3.34803	3.23261	3.22393	3.17381
7895237	7.79482	7.66397	7.95721	7.86378	7.14502	7.2226	7.72679	7.46517	6.52473	7.77027	7.51063	6.98889	7.89078	7.90074	7.91562	7.60256
7895238	10.1462	10.0794	10.1812	8.98655	10.0667	10.2653	10.6716	9.96744	10.6328	10.5153	10.4844	10.4025	10.439	10.3882	10.6249	10.4452
7895239	8.34259	7.35	7.65696	8.22697	8.65582	7.88876	7.98073	8.16875	7.14244	8.00002	7.74119	8.13248	7.27936	7.86142	8.45656	7.53182
7895240	5.77121	4.6655	4.97666	5.41414	6.10645	5.65505	5.37745	5.22362	4.46552	5.80867	5.44807	6.08718	4.68441	5.27774	5.35182	6.0796
7895241	7.68579	7.82588	9.17179	8.4705	8.5153	8.33644	8.31745	7.57874	8.38805	8.60795	8.63601	9.49615	8.80879	8.62811	8.4948	8.57398
7895242	3.62464	3.37352	3.19439	3.32602	3.35952	3.4459	3.67493	3.48666	3.10838	3.30352	3.10582	3.35811	3.2357	3.37512	3.70863	3.20696
7895243	3.92609	3.54873	4.25781	3.88579	4.08269	3.76575	3.84682	3.55685	3.65947	3.62909	3.77602	3.77822	3.77934	4.02733	4.33456	3.41953
7895244	3.47378	2.64081	2.77674	3.27654	3.62037	3.06754	3.58808	2.92379	3.38237	3.66398	2.94368	3.03044	2.79204	3.49562	3.04109	2.74657
7895245	4.19757	3.39494	3.59268	3.57176	4.18355	4.60996	5.80757	5.35709	4.09023	5.0231	3.38167	3.53528	3.28875	4.0391	4.84285	3.84699
7895246	9.0977	8.83865	10.0855	9.54719	9.25258	9.45302	8.90004	8.86872	10.4485	9.29216	7.57542	10.2243	9.40816	9.34946	9.13746	9.76778
7895247	8.65433	8.76984	8.66384	9.26525	9.25581	8.32211	8.5602	8.72721	7.39443	8.52298	8.4576	8.108	8.02846	8.22983	8.47192	8.42848
7895248	10.1043	10.4016	10.4928	10.2858	10.2274	10.1969	10.1171	9.92166	9.1343	10.2159	9.91863	10.323	10.2374	10.0712	9.4469	10.186
7895249	9.10301	7.21251	7.77265	8.53039	9.3034	9.14101	8.64574	8.93163	7.54947	8.62906	7.75503	8.42667	7.37266	8.51316	8.78322	8.09669
7895250	6.43208	5.26568	4.4598	4.44922	5.9138	5.52461	5.80151	6.33256	4.14045	6.51799	3.93617	5.48931	4.19134	5.05515	6.11541	4.87782
7895251	4.11124	4.10182	4.63905	4.097	4.3635	4.45272	4.19255	5.03675	3.27564	4.34265	4.06766	4.65237	3.94375	4.20683	3.92408	4.7975
7895252	6.94085	7.05785	7.56777	6.84012	6.62125	7.70236	6.91172	7.17321	7.47044	6.42699	5.74377	7.95319	7.68826	6.55513	6.79078	7.33319
7895253	5.2516	5.21839	5.1916	5.56196	5.69238	5.06792	4.93239	5.77361	6.39409	6.02385	5.67599	5.12721	5.36628	5.4447	5.55594	5.10157
7895254	6.07614	5.42033	5.55732	6.05305	6.30931	5.57179	6.1539	5.74774	5.47531	5.97574	5.40411	5.51385	5.17975	5.46047	5.82255	6.09831
7895255	3.43769	3.35784	3.35082	3.07509	3.54403	2.80068	5.83212	2.75229	3.40093	2.76017	4.18549	4.28481	3.13425	3.33473	3.12797	3.60963
7895256	7.56336	7.502	8.77434	7.62813	8.44555	7.58407	8.10608	7.3815	7.89349	8.81705	7.84358	8.65116	9.02256	8.27517	8.3841	8.41554
7895257	6.66308	4.94385	5.80236	5.87152	6.14348	5.90468	6.31027	6.50392	10.2276	6.05403	5.69087	6.51958	6.08238	6.27468	6.07047	6.09771
7895258	6.89023	6.63582	7.34571	7.1555	6.88389	7.27095	6.754	6.54353	6.45676	6.94533	5.33509	7.64212	7.65893	7.48216	7.40101	7.27312
7895259	3.99845	3.47199	3.66116	3.78495	3.10209	3.1525	4.62686	3.059	3.46481	4.16476	3.71776	3.22207	4.09895	3.73979	4.07923	4.14874
7895260	7.24119	4.24952	5.26831	6.36286	6.48226	6.58284	6.66057	6.64821	5.08625	6.0532	5.34448	7.32019	4.88726	6.0768	6.88992	6.21857
7895261	4.45227	4.08852	4.42284	4.43453	4.53432	4.82416	5.27875	4.77299	7.11466	4.34315	4.47944	4.54524	4.51575	4.97237	5.00401	4.49072
7895262	6.35077	4.95317	4.80996	5.45324	5.87791	4.61661	5.6778	4.69221	7.56519	5.57135	5.66597	5.82364	4.86158	5.66379	5.8348	5.53453
7895263	10.2895	10.93	10.7577	10.3121	10.0907	10.3909	10.6379	9.95725	10.5077	10.1449	9.29393	10.8091	10.5284	10.4356	10.0776	10.2183
7895264	9.22149	8.79872	8.91454	8.32731	8.12316	8.9544	8.46363	8.73105	8.14397	9.22407	8.75879	8.77057	9.37987	9.13858	8.89295	8.86404
7895265	3.50075	2.73152	2.74412	3.22213	4.00307	3.22165	3.23692	3.41022	3.64122	3.40079	3.30455	3.41211	2.89261	3.48087	3.46346	2.90397
7895266	4.06917	4.17351	4.66005	3.98755	4.84884	3.97564	4.57511	4.73615	3.54701	4.56069	4.47946	4.1996	4.2752	4.71514	4.47804	4.26224
7895267	8.4751	8.67696	8.89807	8.03283	8.74506	8.26743	8.68576	8.31044	7.77695	8.89248	8.96582	8.71466	8.73076	8.78597	8.66296	8.2239
7895268	2.84321	2.84093	2.77189	2.80043	2.76205	2.82946	2.90379	2.92324	2.75857	2.75586	2.61959	2.64312	2.68278	2.68889	3.16987	2.8082
7895269	8.01087	7.04291	6.88507	7.85507	8.34038	8.16434	7.64884	8.04731	7.03494	8.08553	7.65373	7.82889	7.1459	7.80657	7.84142	7.6762
7895270	4.10349	3.82563	3.84711	4.03033	3.94036	4.41075	4.88255	3.42342	4.36989	4.56064	3.71245	4.21538	4.61974	4.4769	3.98611	4.31856
7895271	10.3306	10.6045	10.153	9.8547	9.50406	9.78143	10.2821	10.2662	9.88957	9.56666	9.30985	10.4544	10.0019	10.1034	9.68425	9.9912
7895272	10.7251	10.8912	11.1426	10.7755	10.8128	10.7188	11.0442	10.984	10.4386	10.8761	10.2702	10.8734	11.0463	10.9861	10.8776	10.8172
7895273	9.88896	10.3938	10.462	9.8837	9.78408	9.7532	10.3908	10.323	9.59299	10.7597	10.526	10.8112	10.9773	10.6549	10.1877	10.5776
7895274	11.7873	11.881	11.7887	11.7115	11.7818	11.8184	11.6853	11.7506	10.9691	11.7637	11.5879	11.7573	11.532	11.7641	11.9067	11.7678
7895275	10.9428	11.3439	11.2712	10.7168	11.0005	10.981	11.2632	10.513	10.7818	11.3957	11.206	11.3421	11.3853	11.2016	11.1414	11.3631
7895276	12.0085	12.2097	12.2671	12.2879	12.2534	12.0964	11.7664	11.9546	11.6539	12.0765	11.86	11.8457	12.1547	11.9804	12.1652	11.975
7895277	8.82967	8.62562	9.86368	9.32807	9.49654	9.30598	8.95311	9.17514	9.92246	9.58197	9.84983	10.063	9.75584	9.19731	9.36184	9.51702
7895278	6.10973	6.82004	6.45038	6.58578	6.89259	5.49566	6.29859	5.96484	5.50491	6.66816	5.82437	6.09799	6.45203	6.58752	6.3282	6.53639
7895279	4.96235	4.24932	4.67252	4.44614	5.28065	4.29357	4.47236	4.32695	5.30642	4.99252	2.95829	5.05043	4.645	4.58691	4.30615	4.89077
7895280	8.34614	8.567	8.60356	8.57563	8.55458	8.27061	7.88561	8.04221	8.13365	7.91081	7.95972	7.97405	8.48348	8.32882	8.10711	8.18915
7895281	3.34667	2.88439	2.92459	2.85945	2.83923	3.04687	3.31738	3.47361	4.79509	3.0833	2.7002	2.91995	2.99779	2.99419	3.00889	3.19448
7895282	6.62978	6.28483	5.87276	6.55169	7.36468	6.11041	6.86101	7.52733	5.83295	7.21326	6.42902	6.33269	6.62479	6.80378	6.52332	6.15903
7895283	4.36985	4.07325	4.19831	4.77142	3.55274	3.8889	4.43688	4.29681	4.01181	4.34212	2.74818	4.19481	4.87165	3.7308	4.46438	3.78315
7895284	6.8261	5.98932	6.25814	5.96449	6.37111	5.37644	6.00049	6.67	5.92869	6.92023	5.95744	6.2499	5.84612	6.30994	6.5694	5.71668
7895285	4.26971	3.55977	3.84387	3.5812	4.26157	3.94873	4.8375	4.05999	3.51995	4.41428	3.17109	4.13001	4.16731	3.78695	4.4821	4.01178
7895286	7.22441	7.1805	7.2134	7.31704	7.55204	6.777	6.58815	6.76107	6.24532	7.76229	5.87499	7.25183	7.08251	7.21167	7.26531	7.51096
7895287	6.6991	6.42433	6.50532	6.2829	4.94899	6.54759	6.83513	5.9882	6.34654	5.78381	4.85808	6.35753	5.8411	6.111	6.63237	7.08292
7895288	6.36112	5.26395	5.95096	5.9794	6.15139	4.78401	6.62328	6.20351	5.03759	7.28569	4.40862	6.7504	6.843	6.66788	6.98214	6.44913
7895289	10.2265	10.8068	10.4635	10.1521	10.4874	10.2583	10.5013	10.3226	10.2016	10.8519	10.6954	10.1882	10.4736	10.586	10.5876	10.1093
7895290	8.68698	9.89139	9.54115	9.3531	9.34393	8.66639	9.22349	8.84616	9.17935	9.66327	9.44175	8.98614	9.27589	9.45636	9.18115	9.12622
7895291	3.51607	3.5978	3.8564	4.19791	3.78363	3.8214	4.62902	3.5895	3.47698	3.36279	3.24395	3.80704	4.43061	3.88654	3.76625	3.42794
7895292	8.07365	4.47293	5.84245	6.40018	7.55086	7.13791	7.16543	7.61936	5.94	6.89287	7.39769	7.37772	5.58536	7.15699	7.46472	5.51551
7895293	5.53987	5.80036	5.60507	5.85043	5.73984	5.61085	5.16356	5.89645	4.48812	5.8334	5.77478	5.76301	4.76866	5.32419	5.65244	6.06329
7895294	4.83027	5.45051	8.60549	7.68187	6.75174	7.05096	6.37857	6.85037	8.51694	6.45988	6.5715	8.35249	8.32427	5.89548	7.07557	6.79314
7895295	6.19013	6.27137	6.1124	6.04126	6.73255	5.78537	5.53749	5.73297	4.81795	5.84038	5.85016	5.94207	5.44725	5.74075	6.1056	5.65162
7895296	3.93029	3.69353	4.07376	3.93638	3.97824	3.79185	4.4155	4.41717	3.94292	4.00802	3.81319	4.19749	3.98118	3.96057	4.08916	3.67161
7895297	6.24535	5.72018	6.20734	5.74242	5.99783	5.57209	5.73405	5.85992	3.99325	5.90354	5.76531	5.64828	5.98129	6.06996	6.30968	5.75029
7895298	7.65484	8.09542	7.77088	7.42305	7.54667	7.69003	7.54701	7.6631	5.37165	7.64496	6.01904	7.30869	7.17679	7.46887	7.96405	8.09749
7895299	10.49	10.4726	10.9725	10.7209	10.5519	11.1815	10.2691	10.2781	10.8254	10.5138	10.4454	10.8855	10.5797	10.549	10.6791	10.6188
7895300	7.28733	4.14466	5.23743	6.19128	6.35003	6.86965	6.34689	5.72614	5.4299	6.65878	4.76489	6.78381	5.45406	6.42625	6.82288	6.12789
7895301	8.09789	7.2909	6.9424	7.21083	8.0841	7.38835	7.88595	8.00521	6.14712	8.36745	4.34443	7.1887	7.29737	6.8665	7.25126	8.52044
7895302	7.2308	6.76085	6.15308	6.75605	7.30978	6.88204	8.17678	7.78464	5.14901	7.53495	5.9366	6.55278	5.75296	6.43271	7.92654	7.18662
7895303	3.14114	2.79649	2.99252	3.34672	3.42487	2.96479	3.5696	3.26354	7.31882	3.18501	3.09629	3.23252	3.23201	3.29176	2.88884	2.95177
[truncated: 4,095,742 more chars]
