# Supplementary material for: Corrigendum to “Identification of Differentially Expressed Genes in Pituitary Adenomas by Integrating Analysis of Microarray Data”
Source: Int J Endocrinol. 2018 Sep 6;2018:6069189. doi: 10.1155/2018/6069189 (PMC6146651; doi:10.1155/2018/6069189)
Supplement: Supplementary 1 — The raw data of the included datasets downloaded from GEO database. [file 6069189.f1.zip › row data_GSE51618_series_matrix.txt]

!Series_title	"Gene expression profiling of non-invasion and invasion NFPAs"
!Series_geo_accession	"GSE51618"
!Series_status	"Public on Dec 01 2013"
!Series_submission_date	"Oct 23 2013"
!Series_last_update_date	"May 15 2017"
!Series_summary	"The application of gene expression profiling is to investigate the pathogenesis of aggressive NFPAs."
!Series_summary	"And to identify biomarkers that could play a key role in aggressive behavior of NFPAs"
!Series_overall_design	"Gene expression was measured among pituitary glands,  non-invasion NFPAs and invasion NFPAs"
!Series_type	"Expression profiling by array"
!Series_contributor	"Jie,,Feng"
!Series_contributor	"Li,Q,Hong"
!Series_contributor	"Ya,Z,Zhang"
!Series_sample_id	"GSM1249410 GSM1249411 GSM1249413 GSM1249415 GSM1249416 GSM1249417 GSM1249420 GSM1249421 GSM1249423 GSM1249425 "
!Series_contact_name	"JIE,,FENG"
!Series_contact_email	"fj79330@163.com"
!Series_contact_institute	"BEIJING NEUROSURGICAL INSTITUTE"
!Series_contact_address	"TIANTAN XILI 6, CHONGWEN DISTRICT"
!Series_contact_city	"BEI JING"
!Series_contact_zip/postal_code	"100050"
!Series_contact_country	"China"
!Series_supplementary_file	"ftp://ftp.ncbi.nlm.nih.gov/geo/series/GSE51nnn/GSE51618/suppl/GSE51618_RAW.tar"
!Series_platform_id	"GPL6480"
!Series_platform_taxid	"9606"
!Series_sample_taxid	"9606"
!Series_relation	"BioProject: https://www.ncbi.nlm.nih.gov/bioproject/PRJNA224111"

!Sample_title	"sample733 non-invasion NH1207"	"sample735 non-invasion NH1208"	"sample805 non-invasion NH1211"	"sample845 non-invasion NH1214"	"sample809-invasion-IH1207"	"sample819-invasion-IH1209"	"sample856-invasion-IH1217"	"sampleN-pituitary gland-C1"	"sampleN1-pituitary gland-C2"	"sampleN6-pituitary gland-C3"
!Sample_geo_accession	"GSM1249410"	"GSM1249411"	"GSM1249413"	"GSM1249415"	"GSM1249416"	"GSM1249417"	"GSM1249420"	"GSM1249421"	"GSM1249423"	"GSM1249425"
!Sample_status	"Public on Dec 01 2013"	"Public on Dec 01 2013"	"Public on Dec 01 2013"	"Public on Dec 01 2013"	"Public on Dec 01 2013"	"Public on Dec 01 2013"	"Public on Dec 01 2013"	"Public on Dec 01 2013"	"Public on Dec 01 2013"	"Public on Dec 01 2013"
!Sample_submission_date	"Oct 23 2013"	"Oct 23 2013"	"Oct 23 2013"	"Oct 23 2013"	"Oct 23 2013"	"Oct 23 2013"	"Oct 23 2013"	"Oct 23 2013"	"Oct 23 2013"	"Oct 23 2013"
!Sample_last_update_date	"Dec 01 2013"	"Dec 01 2013"	"Dec 01 2013"	"Dec 01 2013"	"Dec 01 2013"	"Dec 01 2013"	"Dec 01 2013"	"Dec 01 2013"	"Dec 01 2013"	"Dec 01 2013"
!Sample_type	"RNA"	"RNA"	"RNA"	"RNA"	"RNA"	"RNA"	"RNA"	"RNA"	"RNA"	"RNA"
!Sample_channel_count	"1"	"1"	"1"	"1"	"1"	"1"	"1"	"1"	"1"	"1"
!Sample_source_name_ch1	"tumor samlpe"	"tumor samlpe"	"tumor samlpe"	"tumor samlpe"	"tumor samlpe"	"tumor samlpe"	"tumor samlpe"	"pituitary gland"	"pituitary gland"	"pituitary gland"
!Sample_organism_ch1	"Homo sapiens"	"Homo sapiens"	"Homo sapiens"	"Homo sapiens"	"Homo sapiens"	"Homo sapiens"	"Homo sapiens"	"Homo sapiens"	"Homo sapiens"	"Homo sapiens"
!Sample_characteristics_ch1	"tissue: non-invasion non-functioning pituitary adenomas"	"tissue: non-invasion non-functioning pituitary adenomas"	"tissue: non-invasion non-functioning pituitary adenomas"	"tissue: non-invasion non-functioning pituitary adenomas"	"tissue: invasion non-functioning pituitary adenomas"	"tissue: invasion non-functioning pituitary adenomas"	"tissue: invasion non-functioning pituitary adenomas"	"tissue: pituitary gland"	"tissue: pituitary gland"	"tissue: pituitary gland"
!Sample_characteristics_ch1	"gender: male"	"gender: male"	"gender: male"	"gender: male"	"gender: female"	"gender: female"	"gender: female"	"gender: male"	"gender: female"	"gender: male"
!Sample_treatment_protocol_ch1	"The Surgical specimens were frozen at -80℃ in isopentane and stored in liquid nitrogen."	"The Surgical specimens were frozen at -80℃ in isopentane and stored in liquid nitrogen."	"The Surgical specimens were frozen at -80℃ in isopentane and stored in liquid nitrogen."	"The Surgical specimens were frozen at -80℃ in isopentane and stored in liquid nitrogen."	"The Surgical specimens were frozen at -80℃ in isopentane and stored in liquid nitrogen."	"The Surgical specimens were frozen at -80℃ in isopentane and stored in liquid nitrogen."	"The Surgical specimens were frozen at -80℃ in isopentane and stored in liquid nitrogen."	"The Surgical specimens were frozen at -80℃ in isopentane and stored in liquid nitrogen."	"The Surgical specimens were frozen at -80℃ in isopentane and stored in liquid nitrogen."	"The Surgical specimens were frozen at -80℃ in isopentane and stored in liquid nitrogen."
!Sample_molecule_ch1	"total RNA"	"total RNA"	"total RNA"	"total RNA"	"total RNA"	"total RNA"	"total RNA"	"total RNA"	"total RNA"	"total RNA"
!Sample_extract_protocol_ch1	"Total RNA was extracted and purified using mirVana™ miRNA Isolation Kit (Cat#AM1561, Ambion, Austin, TX, US) following the manufacturer’s instructions and checked for a RIN number to inspect RNA integration by an Agilent Bioanalyzer 2100 (Agilent technologies, Santa Clara, CA, US)."	"Total RNA was extracted and purified using mirVana™ miRNA Isolation Kit (Cat#AM1561, Ambion, Austin, TX, US) following the manufacturer’s instructions and checked for a RIN number to inspect RNA integration by an Agilent Bioanalyzer 2100 (Agilent technologies, Santa Clara, CA, US)."	"Total RNA was extracted and purified using mirVana™ miRNA Isolation Kit (Cat#AM1561, Ambion, Austin, TX, US) following the manufacturer’s instructions and checked for a RIN number to inspect RNA integration by an Agilent Bioanalyzer 2100 (Agilent technologies, Santa Clara, CA, US)."	"Total RNA was extracted and purified using mirVana™ miRNA Isolation Kit (Cat#AM1561, Ambion, Austin, TX, US) following the manufacturer’s instructions and checked for a RIN number to inspect RNA integration by an Agilent Bioanalyzer 2100 (Agilent technologies, Santa Clara, CA, US)."	"Total RNA was extracted and purified using mirVana™ miRNA Isolation Kit (Cat#AM1561, Ambion, Austin, TX, US) following the manufacturer’s instructions and checked for a RIN number to inspect RNA integration by an Agilent Bioanalyzer 2100 (Agilent technologies, Santa Clara, CA, US)."	"Total RNA was extracted and purified using mirVana™ miRNA Isolation Kit (Cat#AM1561, Ambion, Austin, TX, US) following the manufacturer’s instructions and checked for a RIN number to inspect RNA integration by an Agilent Bioanalyzer 2100 (Agilent technologies, Santa Clara, CA, US)."	"Total RNA was extracted and purified using mirVana™ miRNA Isolation Kit (Cat#AM1561, Ambion, Austin, TX, US) following the manufacturer’s instructions and checked for a RIN number to inspect RNA integration by an Agilent Bioanalyzer 2100 (Agilent technologies, Santa Clara, CA, US)."	"Total RNA was extracted and purified using mirVana™ miRNA Isolation Kit (Cat#AM1561, Ambion, Austin, TX, US) following the manufacturer’s instructions and checked for a RIN number to inspect RNA integration by an Agilent Bioanalyzer 2100 (Agilent technologies, Santa Clara, CA, US)."	"Total RNA was extracted and purified using mirVana™ miRNA Isolation Kit (Cat#AM1561, Ambion, Austin, TX, US) following the manufacturer’s instructions and checked for a RIN number to inspect RNA integration by an Agilent Bioanalyzer 2100 (Agilent technologies, Santa Clara, CA, US)."	"Total RNA was extracted and purified using mirVana™ miRNA Isolation Kit (Cat#AM1561, Ambion, Austin, TX, US) following the manufacturer’s instructions and checked for a RIN number to inspect RNA integration by an Agilent Bioanalyzer 2100 (Agilent technologies, Santa Clara, CA, US)."
!Sample_label_ch1	"Cy3"	"Cy3"	"Cy3"	"Cy3"	"Cy3"	"Cy3"	"Cy3"	"Cy3"	"Cy3"	"Cy3"
!Sample_label_protocol_ch1	"Total RNA was amplified and labeled by Low Input Quick Amp Labeling Kit, One-Color (Cat#5190-2305, Agilent technologies, Santa Clara, CA, US), following the manufacturer’s instructions. Labeled cRNA were purified by RNeasy mini kit (Cat#74106, QIAGEN, GmBH, Germany)."	"Total RNA was amplified and labeled by Low Input Quick Amp Labeling Kit, One-Color (Cat#5190-2305, Agilent technologies, Santa Clara, CA, US), following the manufacturer’s instructions. Labeled cRNA were purified by RNeasy mini kit (Cat#74106, QIAGEN, GmBH, Germany)."	"Total RNA was amplified and labeled by Low Input Quick Amp Labeling Kit, One-Color (Cat#5190-2305, Agilent technologies, Santa Clara, CA, US), following the manufacturer’s instructions. Labeled cRNA were purified by RNeasy mini kit (Cat#74106, QIAGEN, GmBH, Germany)."	"Total RNA was amplified and labeled by Low Input Quick Amp Labeling Kit, One-Color (Cat#5190-2305, Agilent technologies, Santa Clara, CA, US), following the manufacturer’s instructions. Labeled cRNA were purified by RNeasy mini kit (Cat#74106, QIAGEN, GmBH, Germany)."	"Total RNA was amplified and labeled by Low Input Quick Amp Labeling Kit, One-Color (Cat#5190-2305, Agilent technologies, Santa Clara, CA, US), following the manufacturer’s instructions. Labeled cRNA were purified by RNeasy mini kit (Cat#74106, QIAGEN, GmBH, Germany)."	"Total RNA was amplified and labeled by Low Input Quick Amp Labeling Kit, One-Color (Cat#5190-2305, Agilent technologies, Santa Clara, CA, US), following the manufacturer’s instructions. Labeled cRNA were purified by RNeasy mini kit (Cat#74106, QIAGEN, GmBH, Germany)."	"Total RNA was amplified and labeled by Low Input Quick Amp Labeling Kit, One-Color (Cat#5190-2305, Agilent technologies, Santa Clara, CA, US), following the manufacturer’s instructions. Labeled cRNA were purified by RNeasy mini kit (Cat#74106, QIAGEN, GmBH, Germany)."	"Total RNA was amplified and labeled by Low Input Quick Amp Labeling Kit, One-Color (Cat#5190-2305, Agilent technologies, Santa Clara, CA, US), following the manufacturer’s instructions. Labeled cRNA were purified by RNeasy mini kit (Cat#74106, QIAGEN, GmBH, Germany)."	"Total RNA was amplified and labeled by Low Input Quick Amp Labeling Kit, One-Color (Cat#5190-2305, Agilent technologies, Santa Clara, CA, US), following the manufacturer’s instructions. Labeled cRNA were purified by RNeasy mini kit (Cat#74106, QIAGEN, GmBH, Germany)."	"Total RNA was amplified and labeled by Low Input Quick Amp Labeling Kit, One-Color (Cat#5190-2305, Agilent technologies, Santa Clara, CA, US), following the manufacturer’s instructions. Labeled cRNA were purified by RNeasy mini kit (Cat#74106, QIAGEN, GmBH, Germany)."
!Sample_taxid_ch1	"9606"	"9606"	"9606"	"9606"	"9606"	"9606"	"9606"	"9606"	"9606"	"9606"
!Sample_hyb_protocol	"Each Slide was hybridized with 1.65μg Cy3-labeled cRNA using Gene Expression Hybridization Kit (Cat#5188-5242, Agilent technologies, Santa Clara, CA, US) in Hybridization Oven (Cat#G2545A, Agilent technologies, Santa Clara, CA, US), according to the manufacturer’s instructions. After 17 hours hybridization, slides were washed in staining dishes (Cat#121, Thermo Shandon, Waltham, MA, US) with Gene Expression Wash Buffer Kit(Cat#5188-5327, Agilent technologies, Santa Clara, CA, US), followed the manufacturer’s instructions."	"Each Slide was hybridized with 1.65μg Cy3-labeled cRNA using Gene Expression Hybridization Kit (Cat#5188-5242, Agilent technologies, Santa Clara, CA, US) in Hybridization Oven (Cat#G2545A, Agilent technologies, Santa Clara, CA, US), according to the manufacturer’s instructions. After 17 hours hybridization, slides were washed in staining dishes (Cat#121, Thermo Shandon, Waltham, MA, US) with Gene Expression Wash Buffer Kit(Cat#5188-5327, Agilent technologies, Santa Clara, CA, US), followed the manufacturer’s instructions."	"Each Slide was hybridized with 1.65μg Cy3-labeled cRNA using Gene Expression Hybridization Kit (Cat#5188-5242, Agilent technologies, Santa Clara, CA, US) in Hybridization Oven (Cat#G2545A, Agilent technologies, Santa Clara, CA, US), according to the manufacturer’s instructions. After 17 hours hybridization, slides were washed in staining dishes (Cat#121, Thermo Shandon, Waltham, MA, US) with Gene Expression Wash Buffer Kit(Cat#5188-5327, Agilent technologies, Santa Clara, CA, US), followed the manufacturer’s instructions."	"Each Slide was hybridized with 1.65μg Cy3-labeled cRNA using Gene Expression Hybridization Kit (Cat#5188-5242, Agilent technologies, Santa Clara, CA, US) in Hybridization Oven (Cat#G2545A, Agilent technologies, Santa Clara, CA, US), according to the manufacturer’s instructions. After 17 hours hybridization, slides were washed in staining dishes (Cat#121, Thermo Shandon, Waltham, MA, US) with Gene Expression Wash Buffer Kit(Cat#5188-5327, Agilent technologies, Santa Clara, CA, US), followed the manufacturer’s instructions."	"Each Slide was hybridized with 1.65μg Cy3-labeled cRNA using Gene Expression Hybridization Kit (Cat#5188-5242, Agilent technologies, Santa Clara, CA, US) in Hybridization Oven (Cat#G2545A, Agilent technologies, Santa Clara, CA, US), according to the manufacturer’s instructions. After 17 hours hybridization, slides were washed in staining dishes (Cat#121, Thermo Shandon, Waltham, MA, US) with Gene Expression Wash Buffer Kit(Cat#5188-5327, Agilent technologies, Santa Clara, CA, US), followed the manufacturer’s instructions."	"Each Slide was hybridized with 1.65μg Cy3-labeled cRNA using Gene Expression Hybridization Kit (Cat#5188-5242, Agilent technologies, Santa Clara, CA, US) in Hybridization Oven (Cat#G2545A, Agilent technologies, Santa Clara, CA, US), according to the manufacturer’s instructions. After 17 hours hybridization, slides were washed in staining dishes (Cat#121, Thermo Shandon, Waltham, MA, US) with Gene Expression Wash Buffer Kit(Cat#5188-5327, Agilent technologies, Santa Clara, CA, US), followed the manufacturer’s instructions."	"Each Slide was hybridized with 1.65μg Cy3-labeled cRNA using Gene Expression Hybridization Kit (Cat#5188-5242, Agilent technologies, Santa Clara, CA, US) in Hybridization Oven (Cat#G2545A, Agilent technologies, Santa Clara, CA, US), according to the manufacturer’s instructions. After 17 hours hybridization, slides were washed in staining dishes (Cat#121, Thermo Shandon, Waltham, MA, US) with Gene Expression Wash Buffer Kit(Cat#5188-5327, Agilent technologies, Santa Clara, CA, US), followed the manufacturer’s instructions."	"Each Slide was hybridized with 1.65μg Cy3-labeled cRNA using Gene Expression Hybridization Kit (Cat#5188-5242, Agilent technologies, Santa Clara, CA, US) in Hybridization Oven (Cat#G2545A, Agilent technologies, Santa Clara, CA, US), according to the manufacturer’s instructions. After 17 hours hybridization, slides were washed in staining dishes (Cat#121, Thermo Shandon, Waltham, MA, US) with Gene Expression Wash Buffer Kit(Cat#5188-5327, Agilent technologies, Santa Clara, CA, US), followed the manufacturer’s instructions."	"Each Slide was hybridized with 1.65μg Cy3-labeled cRNA using Gene Expression Hybridization Kit (Cat#5188-5242, Agilent technologies, Santa Clara, CA, US) in Hybridization Oven (Cat#G2545A, Agilent technologies, Santa Clara, CA, US), according to the manufacturer’s instructions. After 17 hours hybridization, slides were washed in staining dishes (Cat#121, Thermo Shandon, Waltham, MA, US) with Gene Expression Wash Buffer Kit(Cat#5188-5327, Agilent technologies, Santa Clara, CA, US), followed the manufacturer’s instructions."	"Each Slide was hybridized with 1.65μg Cy3-labeled cRNA using Gene Expression Hybridization Kit (Cat#5188-5242, Agilent technologies, Santa Clara, CA, US) in Hybridization Oven (Cat#G2545A, Agilent technologies, Santa Clara, CA, US), according to the manufacturer’s instructions. After 17 hours hybridization, slides were washed in staining dishes (Cat#121, Thermo Shandon, Waltham, MA, US) with Gene Expression Wash Buffer Kit(Cat#5188-5327, Agilent technologies, Santa Clara, CA, US), followed the manufacturer’s instructions."
!Sample_scan_protocol	"Slides were scanned by Agilent Microarray Scanner (Cat#G2565CA, Agilent technologies, Santa Clara, CA, US) with default settings, Dye channel: Green, Scan resolution=5μm, PMT 100%, 10%, 16bit."	"Slides were scanned by Agilent Microarray Scanner (Cat#G2565CA, Agilent technologies, Santa Clara, CA, US) with default settings, Dye channel: Green, Scan resolution=5μm, PMT 100%, 10%, 16bit."	"Slides were scanned by Agilent Microarray Scanner (Cat#G2565CA, Agilent technologies, Santa Clara, CA, US) with default settings, Dye channel: Green, Scan resolution=5μm, PMT 100%, 10%, 16bit."	"Slides were scanned by Agilent Microarray Scanner (Cat#G2565CA, Agilent technologies, Santa Clara, CA, US) with default settings, Dye channel: Green, Scan resolution=5μm, PMT 100%, 10%, 16bit."	"Slides were scanned by Agilent Microarray Scanner (Cat#G2565CA, Agilent technologies, Santa Clara, CA, US) with default settings, Dye channel: Green, Scan resolution=5μm, PMT 100%, 10%, 16bit."	"Slides were scanned by Agilent Microarray Scanner (Cat#G2565CA, Agilent technologies, Santa Clara, CA, US) with default settings, Dye channel: Green, Scan resolution=5μm, PMT 100%, 10%, 16bit."	"Slides were scanned by Agilent Microarray Scanner (Cat#G2565CA, Agilent technologies, Santa Clara, CA, US) with default settings, Dye channel: Green, Scan resolution=5μm, PMT 100%, 10%, 16bit."	"Slides were scanned by Agilent Microarray Scanner (Cat#G2565CA, Agilent technologies, Santa Clara, CA, US) with default settings, Dye channel: Green, Scan resolution=5μm, PMT 100%, 10%, 16bit."	"Slides were scanned by Agilent Microarray Scanner (Cat#G2565CA, Agilent technologies, Santa Clara, CA, US) with default settings, Dye channel: Green, Scan resolution=5μm, PMT 100%, 10%, 16bit."	"Slides were scanned by Agilent Microarray Scanner (Cat#G2565CA, Agilent technologies, Santa Clara, CA, US) with default settings, Dye channel: Green, Scan resolution=5μm, PMT 100%, 10%, 16bit."
!Sample_description	"Gene expression in human pituitary glands,  non-invasion NFPAs and invasion NFPAs"	"Gene expression in human pituitary glands,  non-invasion NFPAs and invasion NFPAs"	"Gene expression in human pituitary glands,  non-invasion NFPAs and invasion NFPAs"	"Gene expression in human pituitary glands,  non-invasion NFPAs and invasion NFPAs"	"Gene expression in human pituitary glands,  non-invasion NFPAs and invasion NFPAs"	"Gene expression in human pituitary glands,  non-invasion NFPAs and invasion NFPAs"	"Gene expression in human pituitary glands,  non-invasion NFPAs and invasion NFPAs"	"Gene expression in human pituitary glands,  non-invasion NFPAs and invasion NFPAs"	"Gene expression in human pituitary glands,  non-invasion NFPAs and invasion NFPAs"	"Gene expression in human pituitary glands,  non-invasion NFPAs and invasion NFPAs"
!Sample_data_processing	"Data were extracted with Feature Extraction software 10.7 (Agilent technologies, Santa Clara, CA, US). Raw data were normalized by Quantile algorithm, Gene Spring Software 11.0 (Agilent technologies, Santa Clara, CA, US)."	"Data were extracted with Feature Extraction software 10.7 (Agilent technologies, Santa Clara, CA, US). Raw data were normalized by Quantile algorithm, Gene Spring Software 11.0 (Agilent technologies, Santa Clara, CA, US)."	"Data were extracted with Feature Extraction software 10.7 (Agilent technologies, Santa Clara, CA, US). Raw data were normalized by Quantile algorithm, Gene Spring Software 11.0 (Agilent technologies, Santa Clara, CA, US)."	"Data were extracted with Feature Extraction software 10.7 (Agilent technologies, Santa Clara, CA, US). Raw data were normalized by Quantile algorithm, Gene Spring Software 11.0 (Agilent technologies, Santa Clara, CA, US)."	"Data were extracted with Feature Extraction software 10.7 (Agilent technologies, Santa Clara, CA, US). Raw data were normalized by Quantile algorithm, Gene Spring Software 11.0 (Agilent technologies, Santa Clara, CA, US)."	"Data were extracted with Feature Extraction software 10.7 (Agilent technologies, Santa Clara, CA, US). Raw data were normalized by Quantile algorithm, Gene Spring Software 11.0 (Agilent technologies, Santa Clara, CA, US)."	"Data were extracted with Feature Extraction software 10.7 (Agilent technologies, Santa Clara, CA, US). Raw data were normalized by Quantile algorithm, Gene Spring Software 11.0 (Agilent technologies, Santa Clara, CA, US)."	"Data were extracted with Feature Extraction software 10.7 (Agilent technologies, Santa Clara, CA, US). Raw data were normalized by Quantile algorithm, Gene Spring Software 11.0 (Agilent technologies, Santa Clara, CA, US)."	"Data were extracted with Feature Extraction software 10.7 (Agilent technologies, Santa Clara, CA, US). Raw data were normalized by Quantile algorithm, Gene Spring Software 11.0 (Agilent technologies, Santa Clara, CA, US)."	"Data were extracted with Feature Extraction software 10.7 (Agilent technologies, Santa Clara, CA, US). Raw data were normalized by Quantile algorithm, Gene Spring Software 11.0 (Agilent technologies, Santa Clara, CA, US)."
!Sample_platform_id	"GPL6480"	"GPL6480"	"GPL6480"	"GPL6480"	"GPL6480"	"GPL6480"	"GPL6480"	"GPL6480"	"GPL6480"	"GPL6480"
!Sample_contact_name	"JIE,,FENG"	"JIE,,FENG"	"JIE,,FENG"	"JIE,,FENG"	"JIE,,FENG"	"JIE,,FENG"	"JIE,,FENG"	"JIE,,FENG"	"JIE,,FENG"	"JIE,,FENG"
!Sample_contact_email	"fj79330@163.com"	"fj79330@163.com"	"fj79330@163.com"	"fj79330@163.com"	"fj79330@163.com"	"fj79330@163.com"	"fj79330@163.com"	"fj79330@163.com"	"fj79330@163.com"	"fj79330@163.com"
!Sample_contact_institute	"BEIJING NEUROSURGICAL INSTITUTE"	"BEIJING NEUROSURGICAL INSTITUTE"	"BEIJING NEUROSURGICAL INSTITUTE"	"BEIJING NEUROSURGICAL INSTITUTE"	"BEIJING NEUROSURGICAL INSTITUTE"	"BEIJING NEUROSURGICAL INSTITUTE"	"BEIJING NEUROSURGICAL INSTITUTE"	"BEIJING NEUROSURGICAL INSTITUTE"	"BEIJING NEUROSURGICAL INSTITUTE"	"BEIJING NEUROSURGICAL INSTITUTE"
!Sample_contact_address	"TIANTAN XILI 6, CHONGWEN DISTRICT"	"TIANTAN XILI 6, CHONGWEN DISTRICT"	"TIANTAN XILI 6, CHONGWEN DISTRICT"	"TIANTAN XILI 6, CHONGWEN DISTRICT"	"TIANTAN XILI 6, CHONGWEN DISTRICT"	"TIANTAN XILI 6, CHONGWEN DISTRICT"	"TIANTAN XILI 6, CHONGWEN DISTRICT"	"TIANTAN XILI 6, CHONGWEN DISTRICT"	"TIANTAN XILI 6, CHONGWEN DISTRICT"	"TIANTAN XILI 6, CHONGWEN DISTRICT"
!Sample_contact_city	"BEI JING"	"BEI JING"	"BEI JING"	"BEI JING"	"BEI JING"	"BEI JING"	"BEI JING"	"BEI JING"	"BEI JING"	"BEI JING"
!Sample_contact_zip/postal_code	"100050"	"100050"	"100050"	"100050"	"100050"	"100050"	"100050"	"100050"	"100050"	"100050"
!Sample_contact_country	"China"	"China"	"China"	"China"	"China"	"China"	"China"	"China"	"China"	"China"
!Sample_supplementary_file	"ftp://ftp.ncbi.nlm.nih.gov/geo/samples/GSM1249nnn/GSM1249410/suppl/GSM1249410_733_251485072340_S01_GE1_107_Sep09_1_4.txt.gz"	"ftp://ftp.ncbi.nlm.nih.gov/geo/samples/GSM1249nnn/GSM1249411/suppl/GSM1249411_735_251485072340_S01_GE1_107_Sep09_1_3.txt.gz"	"ftp://ftp.ncbi.nlm.nih.gov/geo/samples/GSM1249nnn/GSM1249413/suppl/GSM1249413_805_251485072340_S01_GE1_107_Sep09_1_2.txt.gz"	"ftp://ftp.ncbi.nlm.nih.gov/geo/samples/GSM1249nnn/GSM1249415/suppl/GSM1249415_845_251485072340_S01_GE1_107_Sep09_1_1.txt.gz"	"ftp://ftp.ncbi.nlm.nih.gov/geo/samples/GSM1249nnn/GSM1249416/suppl/GSM1249416_809_251485072341_S01_GE1_107_Sep09_1_4.txt.gz"	"ftp://ftp.ncbi.nlm.nih.gov/geo/samples/GSM1249nnn/GSM1249417/suppl/GSM1249417_819_251485072341_S01_GE1_107_Sep09_1_2.txt.gz"	"ftp://ftp.ncbi.nlm.nih.gov/geo/samples/GSM1249nnn/GSM1249420/suppl/GSM1249420_856_251485072341_S01_GE1_107_Sep09_1_1.txt.gz"	"ftp://ftp.ncbi.nlm.nih.gov/geo/samples/GSM1249nnn/GSM1249421/suppl/GSM1249421_N_251485072342_S01_GE1_107_Sep09_1_2.txt.gz"	"ftp://ftp.ncbi.nlm.nih.gov/geo/samples/GSM1249nnn/GSM1249423/suppl/GSM1249423_N1_251485072342_S01_GE1_107_Sep09_1_4.txt.gz"	"ftp://ftp.ncbi.nlm.nih.gov/geo/samples/GSM1249nnn/GSM1249425/suppl/GSM1249425_N6_251485072342_S01_GE1_107_Sep09_1_3.txt.gz"
!Sample_data_row_count	"41093"	"41093"	"41093"	"41093"	"41093"	"41093"	"41093"	"41093"	"41093"	"41093"
!series_matrix_table_begin
"ID_REF"	"GSM1249410"	"GSM1249411"	"GSM1249413"	"GSM1249415"	"GSM1249416"	"GSM1249417"	"GSM1249420"	"GSM1249421"	"GSM1249423"	"GSM1249425"
"(+)E1A_r60_1"	18.25706	17.992266	18.188465	17.992266	17.992266	17.893875	18.109303	17.851105	18.109303	17.992266
"(+)E1A_r60_3"	3.0991755	3.0076432	2.8217874	2.3523002	3.0092714	3.2001684	2.5562317	2.6106224	3.3318894	2.6157331
"(+)E1A_r60_a104"	1.7128078	1.8374927	1.6953748	1.7722439	1.7140889	1.8903588	1.7676113	1.7140889	1.8400822	1.7100258
"(+)E1A_r60_a107"	3.9878364	4.4773655	4.3223515	4.103764	4.1002417	4.5891113	4.7275305	3.9808083	4.6658835	4.4041905
"(+)E1A_r60_a135"	7.4995694	7.8046026	7.5699015	7.5315	7.5808325	7.6704736	7.9821243	7.288133	8.133647	7.518297
"(+)E1A_r60_a20"	8.702132	8.922497	8.689477	8.616638	8.774156	8.659122	9.087087	8.885924	9.557573	9.088863
"(+)E1A_r60_a22"	10.4003525	10.609963	10.37059	10.361192	10.478154	10.281244	10.68871	10.687146	11.30401	10.8748
"(+)E1A_r60_a97"	12.918922	13.085922	12.797891	12.786665	12.983274	12.677955	13.199871	13.162426	13.756213	13.293755
"(+)E1A_r60_n11"	14.666006	14.825124	14.605152	14.527084	14.821234	14.426406	15.037095	14.838524	15.375656	14.957049
"(+)E1A_r60_n9"	15.820111	15.896244	15.696642	15.532858	15.916553	15.515717	16.073172	15.880311	16.370998	15.916553
"(+)eQC-39"	1.709829	1.9208162	1.9205455	1.8287761	1.8205538	1.7678698	1.7665597	1.7652128	1.7963547	1.7290453
"(+)eQC-40"	2.7172987	2.8707988	2.3058267	2.6702778	2.9398625	2.826716	2.6150029	2.0592978	2.9445176	2.3344095
"(+)eQC-41"	2.1328652	1.9278655	1.8752248	1.7893364	2.1666884	1.9143559	1.7871945	1.8519013	1.9723909	1.7260711
"(+)eQC-42"	2.2674117	3.4067	3.0208852	3.3340187	2.826716	3.2857947	2.6451936	3.4469175	4.1056027	3.7092497
"(-)3xSLv1"	1.634675	1.646803	1.7148393	1.7512639	1.6618196	1.7387929	1.6822873	1.7023379	1.6431155	1.7013694
"A_23_P100001"	9.921734	11.549547	9.890118	10.508679	11.488208	12.889615	12.671371	11.9302845	12.187704	11.814173
"A_23_P100011"	6.060874	6.742189	6.286086	6.3124967	6.180823	6.805373	6.6862016	5.714329	4.949076	5.620686
"A_23_P100022"	11.910633	9.48991	10.174075	8.363904	11.596418	11.895016	11.9529705	9.644131	11.168709	10.985304
"A_23_P100056"	6.2931657	4.1882744	5.3562355	5.7940855	6.966216	6.186151	4.5549273	7.1488895	5.8313007	5.9279604
"A_23_P100074"	9.128593	9.719425	9.333737	9.361169	9.41944	9.113278	9.363392	9.326745	9.329739	9.539424
"A_23_P100092"	6.9964395	6.7639346	6.6987586	6.8954124	8.294607	6.6624045	7.0225787	7.038334	7.2438946	6.8183737
"A_23_P100103"	7.4464884	8.253298	7.6324654	7.6036444	7.5478053	7.849278	8.553475	7.1916285	7.9930563	7.43617
"A_23_P100111"	5.3198237	5.958773	5.3956404	5.4929876	5.0270677	5.792152	5.946495	5.0806003	5.599257	5.4194317
"A_23_P100127"	5.1931725	5.708387	4.534004	5.0072556	4.739051	3.6751902	5.5739903	3.5196686	3.235822	3.5990388
"A_23_P100133"	7.1103687	7.5846353	7.6907454	7.3037405	7.3306794	7.4541535	8.248982	7.1654134	7.414108	7.2837067
"A_23_P100141"	10.137988	10.115584	9.78615	9.932793	9.872133	9.6569195	9.461094	9.792943	9.407909	9.544017
"A_23_P100156"	9.028275	8.992244	8.979253	8.721839	8.458712	8.835188	9.192513	8.44897	7.7876534	8.480054
"A_23_P100177"	5.5366464	6.6152515	6.4131484	5.8943324	6.4730477	7.5716243	8.471682	4.804222	4.7961006	5.165072
"A_23_P100189"	5.0988016	5.324561	5.156202	5.324561	5.0080566	5.3806615	5.3292365	4.8232517	5.532442	4.9268847
"A_23_P100196"	10.780098	10.478154	10.584768	10.801657	10.944378	11.192932	10.968351	10.924716	11.047411	11.106195
"A_23_P100203"	11.136007	10.912571	10.901339	10.741191	10.878988	10.60245	10.42864	10.919181	10.719773	11.416865
"A_23_P100220"	9.112613	7.081335	8.038534	7.633157	8.997266	9.629749	10.207485	9.258785	9.713895	9.8194065
"A_23_P100240"	3.1861134	3.5157626	3.814024	1.7224482	2.8343616	1.695802	4.0996428	3.6276639	3.4551468	3.3274755
"A_23_P10025"	11.959472	11.74257	11.010885	12.953944	12.836903	9.566153	11.17938	12.734216	13.073696	12.851376
"A_23_P100263"	10.061902	10.049783	9.333374	9.441509	9.057739	9.430142	9.700936	10.402807	10.611891	10.360338
"A_23_P100278"	4.859411	3.808978	5.0901175	3.555403	4.0974	4.203351	4.348689	3.065099	4.907973	3.4123435
"A_23_P100292"	12.158367	11.693453	12.160643	12.121425	12.485076	12.576547	12.509304	12.59557	12.516368	12.521725
"A_23_P100315"	10.646258	10.347056	11.184257	10.515148	10.942127	11.08984	11.81316	10.940408	11.620138	11.186505
"A_23_P100326"	11.436128	11.311306	11.604918	11.468563	11.717516	11.699709	11.91326	11.065644	11.027327	10.873344
"A_23_P100341"	13.191581	13.740228	13.558607	13.531219	13.301257	13.000802	13.15474	13.769203	14.087449	13.74514
"A_23_P100344"	6.504701	9.048225	7.3698535	8.113217	7.2979364	7.123658	7.7544	5.3490696	4.5419064	6.4529414
"A_23_P100355"	10.485649	11.070104	10.756667	10.672687	10.654271	10.61255	10.756228	10.361192	10.426368	10.219837
"A_23_P100386"	7.4874463	8.145881	6.388734	5.297901	7.6388254	7.94335	8.005201	6.2099695	5.710663	5.882542
"A_23_P100392"	9.769978	9.451156	8.820728	10.204417	10.27001	11.114867	9.747737	10.047432	10.352182	10.588827
"A_23_P100408"	5.918577	6.281402	5.8673315	5.906864	5.999473	6.1922903	6.2868857	5.6550665	6.3383923	5.950361
"A_23_P100413"	8.24938	7.9174995	7.767277	7.821002	7.485317	7.7513776	8.451248	7.7437243	8.190421	7.8032136
"A_23_P100420"	11.848833	11.477284	11.614329	11.448252	11.649613	11.398972	11.62221	11.174206	10.714255	10.941152
"A_23_P100441"	10.408009	10.312283	10.436725	10.533253	10.426368	10.565223	10.509347	10.205749	10.051253	10.1295805
"A_23_P100455"	7.347892	7.4166923	7.4020033	7.910096	7.196474	7.884332	8.3454685	7.5788546	8.040935	7.695031
"A_23_P100469"	6.762971	7.043614	7.0193315	7.038515	6.998211	7.3457727	7.1255655	6.752254	6.4669275	6.743469
"A_23_P100478"	10.005886	9.850479	10.049025	9.705501	9.481095	9.647601	9.415095	9.23171	9.257102	9.319494
"A_23_P100486"	12.732095	12.984094	12.999876	12.949016	12.895763	12.963067	13.11326	13.092938	12.995755	12.981999
"A_23_P100499"	9.783231	9.959402	9.680615	9.320547	10.6605215	10.877061	11.066042	8.968523	9.134053	9.304745
"A_23_P100501"	11.437514	12.419761	11.470125	11.508728	11.381015	12.634084	11.712451	11.797594	11.706171	11.774964
"A_23_P100517"	8.724434	8.618869	8.935609	8.530887	8.2849245	8.442725	8.560028	8.849151	9.038906	8.944707
"A_23_P100522"	13.486731	13.4201	13.496338	13.275579	13.252231	12.841282	12.656118	13.740228	14.00584	13.682444
"A_23_P100539"	5.190499	6.03201	5.90621	7.096382	5.3170166	4.506877	4.301808	5.5514455	3.7722986	3.7262287
"A_23_P100556"	10.483672	10.700026	10.506408	10.695506	10.058604	10.028586	10.55734	9.500498	9.669752	9.452203
"A_23_P100576"	10.847778	11.176408	10.949092	11.1185665	11.052675	10.989074	11.352031	10.650829	10.842714	10.849458
"A_23_P100583"	3.4990501	3.3753674	3.6651356	4.6666374	3.6738603	3.490379	3.2847908	2.8891878	3.9773386	2.7942424
"A_23_P100595"	5.122784	4.8891573	5.858727	5.218194	4.1766853	5.4980645	3.611977	4.867609	5.203252	4.2269177
"A_23_P10060"	5.281554	3.4028819	5.337709	4.678726	4.4573874	4.4856243	3.6179826	4.507412	4.620823	4.592589
"A_23_P100602"	9.830206	9.689797	9.783433	9.510677	9.885996	10.404136	10.449204	9.176891	9.23171	8.993448
"A_23_P10062"	3.985756	7.8953753	4.8237867	6.901386	9.100631	9.210806	9.1553	7.4409084	8.098698	8.308304
"A_23_P100632"	12.292338	12.530957	11.876263	12.253242	12.157135	12.213596	12.564826	12.165272	12.906604	12.85445
"A_23_P100642"	11.256315	10.096489	12.224383	6.8626356	3.891721	8.99873	8.398362	8.912265	11.429045	10.810529
"A_23_P100654"	12.132929	11.876263	12.17172	11.943082	11.809321	11.700018	11.603118	11.67019	11.692644	11.653355
"A_23_P100660"	13.52597	10.3176155	13.488109	13.130343	15.118083	14.852283	14.372457	12.020795	12.281104	12.519587
"A_23_P100676"	9.78724	9.983005	9.794767	9.669752	9.701686	9.969498	9.507825	9.537276	9.04561	9.093104
"A_23_P100693"	9.435418	9.569241	9.403204	9.537599	9.489393	9.629063	9.575596	9.892043	10.018206	9.776692
"A_23_P100704"	9.43607	9.647601	9.669953	9.812723	9.681955	9.632339	9.551135	9.920389	9.826085	9.652801
"A_23_P100711"	11.7464905	9.237648	11.02546	10.118555	11.908266	9.298156	9.783023	12.072069	10.699378	11.434729
"A_23_P100730"	11.972163	10.864291	12.012771	11.905998	8.1557665	10.931897	10.998514	11.804428	12.394966	11.85578
"A_23_P100754"	6.441755	7.089654	6.79473	7.8781843	6.6151104	6.6186347	6.290435	6.2597756	6.4357324	6.6050863
"A_23_P100764"	11.803482	12.014212	11.510759	11.950555	11.850942	11.678309	12.086845	11.048547	11.243842	11.129101
"A_23_P10077"	10.250325	9.957922	10.0305195	9.538824	10.553181	10.678039	10.22247	9.5029745	9.418706	9.201878
"A_23_P100779"	8.293775	8.892303	8.968448	8.965587	9.0585785	9.030303	8.305346	8.610354	8.568938	8.557511
"A_23_P100788"	6.989878	7.4694924	7.438015	7.446902	7.087707	7.701746	7.188895	7.3151975	7.6302795	7.423122
"A_23_P100795"	6.0255156	6.5011883	6.1203427	6.834347	7.810065	7.7884364	7.615297	7.250164	6.932212	7.2774734
"A_23_P100802"	13.392536	13.298286	13.56924	13.354152	13.391433	13.528883	13.608098	13.221863	13.794004	13.55559
"A_23_P10081"	7.336994	6.423948	7.209595	7.184184	7.1177444	7.043876	7.0301113	6.677458	5.8060913	6.420354
"A_23_P100868"	8.190421	8.253979	8.003641	7.9506617	8.762942	8.638202	10.19306	9.172345	9.510447	9.478255
"A_23_P100872"	4.0954204	4.945843	4.9077344	4.8275166	4.8491483	4.8311434	4.9446793	4.1830525	4.8045397	4.4607725
"A_23_P100883"	10.455202	10.359293	10.729176	10.783108	10.856414	10.451645	10.675892	10.835764	11.137023	11.019781
"A_23_P10091"	3.2563992	2.8501294	2.8120852	3.99556	2.9263384	3.438044	3.369473	7.6704736	8.484567	7.0830345
"A_23_P100912"	6.775753	7.0898647	7.0005536	6.897281	6.943214	7.148234	7.1640544	6.2440386	5.870817	6.0762625
"A_23_P100931"	1.8504068	4.7235737	1.4896649	9.011021	1.4900608	1.4878665	1.517116	2.8994012	1.9178293	2.8997939
"A_23_P100935"	2.2693067	2.6220515	1.9893609	7.81045	1.6399035	1.6781766	1.6184661	1.6708481	2.3255577	2.6486356
"A_23_P100959"	5.4757648	5.2183456	5.282768	5.88303	4.7924423	5.6629543	5.4472117	5.2580485	5.9728093	5.3587523
"A_23_P100963"	5.9848385	6.230426	5.873772	6.132817	7.29214	7.1402807	7.0775814	6.242379	6.0770564	5.7139535
"A_23_P100990"	3.5100658	4.2023544	4.4089813	4.4277444	4.82281	5.274104	4.303258	4.281011	3.978728	3.8043
"A_23_P100991"	1.5479128	1.5476749	1.5974559	1.5861857	1.5831279	1.620611	1.567526	1.5972598	1.5645976	1.6170928
"A_23_P101007"	5.0420628	4.5861225	5.2116814	4.5998926	4.503323	5.5218673	5.039943	4.9391103	5.1284995	5.071549
"A_23_P101013"	7.386536	6.3303967	6.198239	6.1605206	7.83575	6.127459	7.3711395	6.643919	6.793886	6.4551477
"A_23_P101025"	8.186065	7.6246305	7.1154575	6.9891977	8.704839	7.5779395	7.7658935	7.113889	7.0342917	6.8264656
"A_23_P101038"	1.8132129	1.853665	2.1207604	2.557132	1.953058	2.443692	2.1996515	2.1223693	1.872486	2.1200514
"A_23_P101048"	2.705467	3.0402837	3.2035131	3.6264815	1.5717751	2.891979	3.8425581	2.4725194	2.6835654	2.629592
"A_23_P101054"	2.082761	2.0952907	2.1155348	1.7783082	1.6182603	2.3466735	3.4063644	2.250909	1.586337	1.5907419
"A_23_P101073"	3.6781843	3.9248514	4.241942	4.4319715	4.0626435	3.9230676	3.6848688	3.8458047	3.0425942	4.1082025
"A_23_P101084"	2.722796	4.203351	1.7086852	1.8191954	1.6654044	6.2431216	2.5620522	3.4460337	1.6151547	3.46592
"A_23_P101093"	7.327415	7.374362	7.228932	7.5970902	7.971391	5.4903555	6.722604	8.60864	8.144704	8.01191
"A_23_P101111"	9.162436	9.409682	9.1442585	9.189978	9.298932	9.275513	9.834122	8.922998	8.833998	8.638527
"A_23_P101121"	8.227819	8.587042	8.589393	8.760356	8.59547	8.658909	9.032195	9.032389	8.527512	8.993668
"A_23_P101131"	10.318503	10.9888525	11.273454	9.86696	4.625774	4.3753185	4.476219	7.226871	8.457218	7.823594
"A_23_P101141"	6.299775	5.255529	5.926566	5.179611	7.5226035	5.1722746	6.478167	6.3511333	5.243238	5.8164268
"A_23_P101185"	11.63698	11.560427	11.850104	11.367489	11.434729	11.73986	11.411388	11.830315	11.674036	11.685818
"A_23_P101193"	9.329739	10.259188	9.548269	10.34083	10.820065	10.585439	11.501637	11.173031	11.005179	11.198149
"A_23_P101208"	12.853571	11.350428	12.449693	11.817499	11.411388	10.342806	10.487972	11.904481	12.434326	13.041394
"A_23_P10121"	10.567983	10.303401	5.5383406	7.1402807	11.110465	4.2269177	6.779864	6.0602627	6.7793493	6.426826
"A_23_P101237"	9.877395	9.621251	9.755966	9.583657	14.534079	10.127303	10.00081	10.011948	9.943805	9.936616
"A_23_P101240"	11.2251625	8.383288	9.15376	8.493162	9.25815	8.947786	8.435314	10.8823395	10.984615	10.137044
"A_23_P101246"	7.6169066	5.9089055	7.1196833	7.83152	6.637441	6.14233	5.374237	6.7135663	7.6126256	7.3643417
"A_23_P101253"	7.0159483	7.071932	6.976915	7.0453534	6.9730806	7.28053	6.4819617	7.369357	7.5189433	7.5082
"A_23_P101258"	6.527913	6.801391	6.5604753	6.4565473	6.27519	6.5425987	5.8021445	6.7746887	6.965979	6.7152047
"A_23_P10127"	12.154186	11.652287	6.727774	8.501947	12.524921	5.0898724	8.158865	7.753724	8.79912	7.9900684
"A_23_P101272"	11.472053	11.522557	11.449829	11.826269	11.630621	11.925128	10.749906	11.7147	11.703422	11.393461
"A_23_P101281"	11.055699	11.114867	11.059831	11.294651	10.9758415	10.979691	11.086342	11.597468	11.654671	11.48953
"A_23_P101297"	6.712792	7.2635694	8.837663	6.173889	8.324976	9.2456255	6.333508	9.001083	9.733742	8.473633
"A_23_P101303"	11.571205	11.086659	11.83137	11.180752	11.899334	12.263475	12.359436	11.905479	12.15292	12.051105
"A_23_P101308"	8.629457	8.623252	9.519764	8.796415	9.404648	10.022293	9.570076	9.326941	9.478062	9.24433
"A_23_P101319"	7.390807	6.9116597	7.608926	7.4638214	6.695796	7.4040565	7.454871	6.89671	6.8555627	7.0295024
"A_23_P101321"	6.406637	6.454316	6.3731165	6.1867795	6.9141316	7.0164223	6.9452515	6.2189517	6.7649693	5.9728093
"A_23_P101332"	10.959638	10.398163	10.899379	10.537358	11.173031	11.404237	10.930632	11.249936	11.264256	11.20332
"A_23_P101342"	6.7340155	7.055459	7.2872553	7.1115265	7.2922606	7.390807	7.196474	6.598629	6.942367	6.837582
"A_23_P10135"	9.507059	9.260725	9.268446	9.202479	9.560882	9.733907	9.712038	9.223982	8.696099	9.1185055
"A_23_P101351"	10.138693	9.544652	9.891382	9.703509	10.064911	9.935651	8.7115345	9.805959	9.849581	9.950283
"A_23_P101374"	5.4673424	7.8752785	7.73012	7.456202	5.590154	4.9146185	5.0238795	5.2931395	5.8418217	5.0575542
"A_23_P101380"	7.9260406	6.367984	8.725705	6.2782607	6.4331465	5.931997	7.046924	7.7446413	8.623563	7.9634585
"A_23_P101392"	8.576507	9.020866	9.304745	9.894272	10.536016	11.062788	9.740292	9.315407	10.147843	9.791235
"A_23_P1014"	9.143026	10.000065	9.657892	10.218691	9.701429	9.720545	10.437057	9.579272	9.921938	9.915898
"A_23_P101407"	10.6416235	10.491725	9.2148075	9.574869	12.678487	10.420058	7.666348	11.478453	9.149843	9.121491
"A_23_P101427"	8.382177	8.795462	8.306248	8.243791	8.278752	8.575733	8.781201	7.7149186	7.938307	8.074993
"A_23_P101434"	3.288305	4.4757094	2.539371	3.228212	5.907916	4.419173	6.2895527	3.1893384	3.2374842	2.523753
"A_23_P101461"	13.325478	13.143614	13.348042	13.246037	13.532656	13.360606	13.393298	13.107006	13.259173	12.887982
"A_23_P101476"	6.5351796	6.794437	5.8740063	6.1813827	5.9199605	5.4434776	5.128078	6.263867	5.9049892	5.913143
"A_23_P101480"	12.239217	12.000287	12.5969925	12.073987	12.000688	12.061062	11.923009	11.723055	12.086103	11.480988
"A_23_P101505"	7.500787	5.1185575	7.09567	5.561962	5.560734	3.806951	5.287342	8.700202	10.804039	10.351095
"A_23_P101516"	10.019558	10.389779	10.593004	9.759639	11.25467	10.910162	11.393163	9.381893	10.404136	10.228078
"A_23_P101521"	5.4188113	3.2643156	2.0041325	2.0257459	1.8167624	2.828496	2.1552856	6.1298566	5.039573	4.914391
"A_23_P101532"	16.562864	16.238667	16.65432	16.370998	16.605404	16.642645	16.524439	16.599363	16.65432	16.567104
"A_23_P101551"	9.469551	9.439053	9.320806	9.61196	9.570238	9.473799	9.631625	9.942144	10.238188	10.558701
"A_23_P10156"	8.958278	8.825135	8.892143	8.635984	8.671222	9.187166	9.129993	8.170939	8.595293	8.25189
"A_23_P101564"	2.679939	2.5043244	2.5275984	3.1235204	2.6375036	1.9906304	2.9680076	2.1482031	3.1946502	2.5197003
"A_23_P101573"	3.235822	3.2349966	2.952677	2.546835	3.6030233	3.383871	2.9513218	2.622814	3.4449577	2.279643
"A_23_P101615"	8.297618	8.4162	8.216252	8.465319	8.298795	8.407299	8.157334	8.41302	8.26541	8.331835
"A_23_P101623"	8.526913	8.561773	8.893723	8.4605875	8.746758	9.034178	8.350512	9.862148	9.450957	9.878269
"A_23_P101636"	2.6510346	2.597059	3.3126125	1.7228411	3.40585	3.6074762	2.7318747	2.8656876	3.027024	3.0372314
"A_23_P101642"	11.227337	9.777807	9.576916	6.3538084	5.0586095	8.941355	6.371332	9.25437	9.551907	10.361192
"A_23_P101655"	10.458923	10.667594	10.301851	10.211454	10.470791	10.296611	10.650648	10.144685	9.921521	10.363105
"A_23_P101671"	13.148632	13.47614	13.535283	12.782707	11.873749	12.3884535	11.287593	12.639131	12.792938	12.6325865
"A_23_P101683"	3.8640225	4.0347667	4.1297164	5.627774	5.454057	4.615854	6.919692	4.14096	3.026689	2.908915
"A_23_P101699"	8.517226	8.764457	8.890601	8.371277	8.847542	8.899012	8.777207	7.9234605	8.399634	8.581584
"A_23_P101707"	8.683636	8.00287	8.272963	7.733931	7.6051507	7.8849545	7.0064273	7.237246	8.070697	7.867134
"A_23_P10172"	8.383752	8.774931	8.642601	11.444393	5.075159	2.5903978	5.8139853	7.3187523	8.1557665	8.0400305
"A_23_P101737"	8.089365	7.523617	8.141633	7.625745	7.9910307	7.966967	8.186065	7.5630507	7.8904023	7.676795
"A_23_P101742"	11.960821	12.202974	12.039827	11.924501	11.904009	12.222019	11.917358	11.76517	12.202418	11.96977
"A_23_P101759"	4.9994245	5.160605	5.169469	4.8209715	5.826729	5.221004	4.8034415	5.4877048	5.818723	5.6522655
"A_23_P101761"	10.138169	10.157822	10.030196	10.026712	9.579524	9.881204	9.976891	10.633969	10.93362	10.483106
"A_23_P101774"	4.791763	4.6530204	4.80478	4.505783	4.754226	5.0459127	4.3621116	4.799033	5.103	4.6516232
"A_23_P101783"	5.062063	5.4014177	5.1544147	5.1687226	5.057035	5.489946	5.527599	4.8911467	5.003761	5.06105
"A_23_P101796"	6.2227893	4.9746256	5.900557	5.412675	5.9423814	5.0370865	5.279823	6.116686	4.634213	4.8917017
"A_23_P101806"	8.239228	10.339837	10.523256	9.670668	8.035982	8.680793	11.223427	8.266719	9.779214	9.567153
"A_23_P101811"	9.269779	8.801994	9.259036	8.837519	8.942204	9.226611	8.716337	8.714446	8.975155	8.623252
"A_23_P10182"	8.360062	10.775886	10.385986	9.516689	8.364558	8.348171	6.4350677	9.348257	9.96148	9.378969
"A_23_P101829"	6.3584366	6.2754784	5.8416758	6.730313	5.957101	5.8406267	6.521091	6.255213	6.024743	6.07395
"A_23_P101871"	8.514313	6.418636	8.228212	7.131235	7.15874	6.981861	8.200511	8.561203	7.3937426	8.280226
"A_23_P101893"	7.2344885	7.5378804	6.966567	7.060444	7.025509	7.419679	7.3032084	8.878934	8.176747	8.240389
"A_23_P101905"	13.336503	9.83616	13.439528	6.408864	12.656118	12.22301	13.094522	12.210262	12.696758	12.646231
"A_23_P101908"	12.355771	9.068663	12.442709	6.4483886	11.566191	11.336259	12.048075	11.147662	11.6638365	11.666532
"A_23_P10194"	16.282953	16.027422	15.971671	16.027422	15.8248415	16.38469	16.154129	15.43796	15.70121	15.754038
"A_23_P101943"	10.905548	10.543403	10.629038	10.800832	10.989437	11.139602	11.160446	10.941939	10.860703	11.178658
"A_23_P101950"	15.076298	15.047883	15.44126	14.867203	15.21094	15.285777	15.511055	14.804164	14.85898	14.942993
"A_23_P101960"	8.903345	8.0884075	7.883027	7.8282013	9.648714	7.187895	8.703068	10.168816	10.688297	10.107042
"A_23_P101972"	5.578953	6.504973	5.799241	5.800761	8.735644	5.705706	6.4162326	5.7702293	5.478208	5.188847
"A_23_P101992"	8.038252	10.183466	9.561792	4.096098	9.085453	9.240114	8.602463	7.7115493	9.598047	9.802408
"A_23_P102000"	10.735661	8.714619	9.043671	10.142245	10.989802	9.279793	11.406993	10.974879	11.630367	12.425727
"A_23_P102017"	2.9920497	1.5542216	1.6067891	1.6744884	3.3755128	1.6047068	1.6141561	2.976588	1.8421448	1.5878657
"A_23_P102037"	7.5864725	8.244297	7.647735	7.738099	7.576146	7.9249973	8.112423	7.566224	7.263008	7.980599
"A_23_P102058"	1.5202422	1.5239843	1.5434101	1.5802239	3.8211262	1.5361214	1.5572703	1.5223185	1.5151484	1.5291734
"A_23_P10206"	2.1596549	1.5543967	1.5955462	1.675454	3.7609153	1.5907419	1.6166685	1.5458896	1.5334129	1.5629177
"A_23_P102060"	12.653602	11.947127	11.91326	11.637407	11.482006	10.777022	11.494301	11.449829	11.2251625	11.413165
"A_23_P102071"	6.2700996	7.253739	6.3030353	6.549949	5.828697	6.189422	6.9156294	5.70305	5.3250055	5.8310933
"A_23_P102083"	1.8347052	1.7976173	2.012792	2.2549398	1.8934747	2.2068517	2.0468044	2.0137088	1.8205538	2.049902
"A_23_P102109"	9.856919	10.827464	9.948785	11.825277	10.144869	9.4624195	9.3292465	11.228035	11.593824	11.173031
"A_23_P10211"	10.329464	10.319529	10.120592	9.312186	6.331714	5.4883533	5.4630785	9.464004	9.707642	9.645653
"A_23_P102113"	8.153803	9.441785	9.287878	9.748571	6.190045	6.021296	5.6758738	9.740292	9.994529	9.524527
"A_23_P102117"	6.2563915	7.3725924	7.1285777	7.4424124	4.6625733	4.8970313	4.438653	7.5496483	8.0428095	7.334817
"A_23_P102122"	13.800665	14.065413	13.800665	13.821601	14.200865	13.999883	14.726822	13.714776	13.677958	13.730508
"A_23_P102160"	9.727301	9.537115	9.719173	9.558807	8.891859	9.030607	8.727218	8.016602	7.476858	7.9828587
"A_23_P102172"	4.4218163	6.126866	5.578323	6.2146773	5.116303	5.33914	4.5491533	6.1057477	5.5005436	5.3994274
"A_23_P102183"	9.269524	9.835649	9.477693	9.5265665	9.063834	8.8751745	9.546865	9.202039	9.511067	9.672907
"A_23_P102192"	7.145428	7.420128	7.528482	7.452491	7.78502	7.8755083	8.440339	7.6049924	7.8318048	7.2763486
"A_23_P102202"	12.856319	12.385469	12.633716	12.494573	11.85778	11.759603	12.1239	12.25223	12.158367	12.161263
"A_23_P102235"	12.143822	12.609061	12.303189	12.447528	12.232763	11.887669	12.20818	12.339468	12.430736	12.566457
"A_23_P102242"	8.627062	8.521369	8.649792	8.42363	8.552157	8.710276	8.823871	8.1618395	8.778931	8.487633
"A_23_P102258"	12.721518	12.57338	12.712829	12.984969	12.833089	13.140064	13.241137	13.097874	13.077035	12.978283
"A_23_P102262"	11.60903	11.615595	11.873749	11.777011	11.840102	11.592631	11.992622	11.789059	11.725601	11.751576
"A_23_P102278"	1.5361214	1.5244259	1.5644865	1.596508	6.1767797	3.904947	1.5670844	2.60426	3.5470233	2.4291887
"A_23_P102286"	1.9143559	2.2658963	2.8603861	4.0573215	1.5167655	1.5277379	1.5300255	1.5161824	2.8990655	2.1895082
"A_23_P10232"	3.5688682	9.890935	7.7060385	10.267821	9.606657	9.30583	10.333226	7.880274	7.138868	7.829428
"A_23_P102320"	10.861171	9.561321	9.946548	9.905148	9.931877	10.25016	10.295115	10.276794	10.276261	10.393291
"A_23_P102331"	4.2189283	1.5790776	3.9542196	1.6271536	1.5569808	1.5806047	1.5947708	6.3277197	5.6801105	4.737845
"A_23_P102351"	6.875998	6.825056	6.7852	6.745574	7.3256702	8.001724	8.604972	7.2543664	6.701911	6.760338
"A_23_P102364"	8.344345	8.314166	7.703865	6.0527735	7.640283	5.9583883	4.708848	9.48967	9.159498	9.880491
"A_23_P102391"	13.282896	11.507735	11.832807	11.169354	11.346601	11.168709	11.585901	12.004325	12.083085	11.908685
"A_23_P102404"	13.666076	14.358568	13.951965	14.121952	14.02983	13.748624	13.789503	13.53186	13.474416	13.39933
"A_23_P102412"	9.46496	10.298959	9.790653	10.491725	9.594915	9.727301	9.71863	10.12515	9.957705	10.066291
"A_23_P102420"	14.72451	14.861655	14.973765	15.123343	14.802088	14.520708	14.938892	14.376469	14.070402	14.399716
"A_23_P102439"	7.2687826	7.3213043	7.1919007	7.129133	7.0057654	7.336771	7.3807855	7.7078547	10.7150955	12.826225
"A_23_P102454"	7.660217	7.4348297	7.621641	7.956334	7.642163	7.9066424	8.142118	8.174324	7.827905	8.1769495
"A_23_P102462"	6.083851	8.003022	6.925179	7.5803523	5.630099	6.9164114	6.971935	7.6322165	7.4105306	7.179144
"A_23_P102471"	9.442001	9.698521	9.838373	9.652389	9.223817	9.421334	9.789642	9.32655	9.1098995	9.380737
"A_23_P102481"	1.9896841	4.3209977	3.8823547	3.8860714	1.9623249	4.585659	4.3264875	3.1628206	3.5748982	3.3358154
"A_23_P102494"	7.6573153	7.7064176	7.2755585	7.1912045	7.5238543	7.6836085	7.9233236	8.429513	7.820542	8.019507
"A_23_P102508"	8.73806	8.35632	8.671222	8.386803	8.632515	8.859024	9.106477	8.433216	7.7654257	8.047092
"A_23_P102517"	9.627471	10.901339	10.332447	11.716341	10.600501	10.376144	10.17051	9.412725	9.06599	9.978649
"A_23_P102523"	9.061783	9.149533	8.915018	8.692351	8.573314	8.721406	8.9530945	9.179152	9.709655	8.924822
"A_23_P102542"	11.159466	10.934287	11.135266	11.177204	10.808842	10.983549	11.103686	11.086659	11.349343	11.246816
"A_23_P102551"	2.2543063	1.8026251	1.4877949	1.4907204	3.931855	1.4882126	1.488657	2.2001493	1.4878665	1.4879713
"A_23_P102571"	13.361692	12.668398	13.485252	12.417175	13.677958	13.209545	13.880226	12.656118	13.067195	12.784048
"A_23_P102575"	10.921023	10.300159	11.0462475	10.065652	11.224759	10.727764	11.392792	10.261662	10.526516	10.37216
"A_23_P102582"	12.373655	11.975677	12.144352	12.234824	11.969437	11.790075	12.365147	11.484421	11.48953	11.897976
"A_23_P102607"	7.5595627	7.537407	7.45593	7.3602715	7.1779847	7.341752	7.4632387	7.2468367	7.6798134	7.3648586
"A_23_P102611"	6.132344	4.0946565	5.351508	3.6078947	9.535883	6.281402	6.0765624	5.7787457	4.6552696	5.1477275
"A_23_P102622"	6.9136553	6.3439794	5.6290097	7.153925	8.221773	5.243238	4.716057	6.4118648	7.4579883	7.0330577
"A_23_P102634"	1.7190943	1.7078931	1.7850503	1.8982158	2.719189	1.8673121	1.7567868	1.8175728	2.4096408	1.7997218
"A_23_P102681"	4.499786	3.465475	4.448534	3.6199539	4.6332464	3.8860714	3.7194736	5.719084	4.458177	4.4155197
"A_23_P102694"	4.611063	4.946064	4.519279	4.7282386	4.14547	4.9053473	4.96238	4.2214665	3.9843178	3.808978
"A_23_P102706"	9.380264	10.696923	10.905006	10.740811	10.48951	11.339371	9.8289175	10.360338	10.122309	9.667143
"A_23_P102731"	8.313632	7.9849744	7.806471	8.154065	8.21207	8.672388	7.9558163	8.556903	8.187913	8.994558
"A_23_P102743"	6.941045	7.6049924	7.4959874	7.455115	6.569786	7.1823196	7.4393244	7.6029634	8.073631	7.576977
"A_23_P102759"	6.4145474	5.8527613	6.0067067	6.553123	6.322757	6.3003864	6.5733924	6.7100644	7.5208797	6.981229
"A_23_P102769"	7.115653	6.570875	7.2563286	7.231175	7.20032	7.2122517	7.465521	7.972104	7.719185	8.077388
"A_23_P102770"	11.264256	11.092832	11.32908	10.926738	11.556875	11.318615	11.451686	11.35809	10.836483	11.240884
"A_23_P102816"	6.175972	6.5199986	6.211253	6.3703575	6.0730653	6.3838034	6.296434	6.391678	6.859794	6.399518
"A_23_P102832"	9.753285	10.279132	9.89037	10.153463	9.685675	9.632082	9.784743	9.719564	9.103445	9.303748
"A_23_P102842"	11.234282	11.388825	11.246517	11.556875	11.735346	11.977852	11.994476	11.390082	11.179234	10.976706
"A_23_P102864"	1.5037707	1.9924511	1.5175865	1.5372936	1.5053198	1.5152426	2.6466308	1.5010866	1.5045334	1.6011553
"A_23_P102876"	12.765183	13.192795	13.183221	13.205004	13.114939	13.060469	13.186832	12.756933	12.668398	12.9762745
"A_23_P102884"	5.9835386	6.4100103	6.3264036	6.379091	6.1296463	6.596726	6.2372518	6.0636196	6.4376707	6.1664133
"A_23_P102890"	13.349129	12.919641	13.408852	13.372428	13.365493	11.984712	11.908266	13.536307	13.079154	13.140958
"A_23_P1029"	7.497647	5.3076477	8.115456	6.2901893	6.82581	5.236723	5.644544	7.7488184	7.971568	7.5685196
"A_23_P10291"	3.8937225	3.781683	4.4444065	4.3004584	7.893321	9.408963	9.790653	3.6646523	4.290345	5.2580485
"A_23_P102917"	4.8005857	5.499289	4.4719934	4.4464245	4.018764	4.094157	2.921418	3.1568332	3.3043919	3.8075829
"A_23_P102919"	3.3314688	4.4262533	3.4392822	3.1213527	1.5199745	2.178448	1.5101014	1.5539502	1.5382779	1.5408874
"A_23_P102925"	9.537115	9.460744	9.88397	9.3263855	9.959731	10.101849	9.833157	9.113457	9.094356	9.0694065
"A_23_P102937"	11.462662	10.977904	11.500368	11.144353	10.8850155	10.969404	10.42616	10.785872	10.262265	10.764884
"A_23_P102950"	12.415735	12.121611	12.333273	12.236847	11.106195	11.144353	10.324229	13.190995	12.738719	12.89974
"A_23_P102965"	9.719564	10.057528	10.031083	9.81921	9.773691	10.111841	10.272165	10.71998	10.335255	10.241633
"A_23_P102973"	9.956367	9.799225	9.798706	9.533826	9.510677	10.0305195	10.129733	9.090639	9.32655	8.933926
"A_23_P102988"	6.4718432	6.5739546	6.430815	6.023448	5.5286436	7.02646	6.916242	5.9887676	5.5429792	6.405654
"A_23_P102994"	12.950536	12.692414	12.769165	12.742757	12.741673	12.900734	12.845774	11.990704	12.071337	12.168291
"A_23_P103011"	11.690527	11.209229	11.854767	11.609526	11.014619	11.696657	10.724374	11.728196	12.215922	11.712897
"A_23_P103034"	3.7333167	3.984176	2.6825948	3.3041632	2.0934622	3.3721192	1.7685574	2.0252645	1.7998639	2.6247377
"A_23_P103041"	4.7873344	5.729429	5.1488953	5.353645	5.726181	6.7431116	6.2909217	5.2310224	4.3459363	4.8735843
"A_23_P10305"	6.0887585	7.5750017	6.215707	7.010848	5.270634	5.8340607	6.369963	5.6110334	6.042836	5.6081314
"A_23_P103062"	7.9066424	8.506864	8.311182	8.433216	7.726057	8.225639	8.121673	8.215088	7.7099233	7.900393
"A_23_P103070"	10.932518	11.005179	11.233864	10.615515	10.837478	10.5303	10.717667	10.766512	10.848292	11.028541
"A_23_P103084"	8.967391	8.956289	8.974144	8.428044	8.944243	9.382335	9.413271	8.589759	8.271211	8.694424
"A_23_P103099"	10.17619	10.566222	9.900253	9.794767	9.973445	10.05573	10.079116	9.246637	9.470615	9.835649
"A_23_P103104"	8.40182	7.4269557	7.8004684	7.058545	9.041811	7.6342573	8.049147	7.6206007	7.476588	7.4166923
"A_23_P103110"	5.768262	5.619152	5.102084	5.438001	7.974505	4.3144755	5.482793	7.309177	5.245738	6.430513
"A_23_P103120"	11.863681	11.623259	11.576212	11.856235	11.684106	11.720487	12.019744	11.966833	11.626485	11.77559
"A_23_P103131"	11.594526	11.427845	11.651254	11.476045	11.257929	11.377541	11.527463	10.867682	10.813689	11.099805
"A_23_P103149"	13.292341	13.467241	13.467241	13.083214	12.955651	13.256309	13.605576	11.968824	11.935411	12.060004
"A_23_P103172"	9.751014	10.804039	11.065644	10.398163	10.189845	10.289463	10.09531	10.628788	10.524418	10.471954
"A_23_P103180"	10.150598	11.111254	11.305744	10.678039	10.583066	10.589439	10.035925	11.041837	11.310176	11.141211
"A_23_P103201"	10.491418	10.484545	10.654271	10.335962	11.41942	11.133685	10.774687	10.75791	10.249827	10.848292
"A_23_P103226"	9.34162	9.325699	8.906049	9.263402	8.204518	8.850695	8.869761	7.7639723	8.226846	8.562892
"A_23_P103232"	11.399308	10.732431	9.2852	12.763132	12.079907	10.507098	11.657027	11.802161	11.53171	11.30831
"A_23_P103248"	9.58787	9.079961	9.505523	9.606371	9.118381	9.414986	9.371261	9.499338	9.775514	9.948561
"A_23_P103256"	9.151314	5.636561	8.036493	6.9528294	9.999619	5.6491003	7.211114	8.278897	7.185238	8.110133
"A_23_P103269"	5.164335	5.0350876	5.4407263	4.9998775	5.361387	5.2350793	4.264256	4.8242197	5.0975766	4.7570744
"A_23_P103276"	7.190783	7.356641	7.4751434	7.6218605	6.9179106	7.081335	6.827684	7.105275	6.8900995	6.79671
"A_23_P103282"	14.116645	14.034083	13.953166	14.451152	14.051543	14.170105	13.92359	14.105691	14.020918	14.268632
"A_23_P103310"	4.190707	4.425752	3.775918	3.6544018	3.7919683	4.493785	3.7800307	3.6259906	4.3332644	4.4570003
"A_23_P103315"	12.700448	12.437426	12.223545	12.302335	12.138157	12.204406	11.937468	12.918922	13.195304	13.123384
"A_23_P103328"	3.4734032	1.6101717	2.942454	2.9721985	5.6912966	2.7867713	3.8633602	1.8402792	1.6319444	1.6739484
"A_23_P103334"	9.424789	9.494076	9.312186	9.444849	9.698521	10.067176	10.16034	9.28344	9.991911	9.439053
"A_23_P103349"	1.53445	1.5318363	1.5739776	1.6294287	1.5428137	1.5662696	1.5838017	1.5302047	1.5586593	1.5472271
"A_23_P103361"	5.911101	4.9107237	4.617194	4.7121725	6.880514	4.214949	7.1002107	5.6002345	6.028947	5.6591034
"A_23_P103371"	8.269617	8.302955	8.134214	8.287081	7.881237	8.026645	7.8746414	6.869863	6.1702075	6.711402
"A_23_P103398"	12.891911	13.684897	12.599514	13.556954	13.026626	12.437426	13.026626	12.298935	12.442709	12.4416895
"A_23_P103405"	8.398083	8.52184	8.597514	9.026299	6.6835155	7.9571433	8.001068	7.971391	7.9014807	7.3662033
"A_23_P103414"	11.818617	11.961276	11.938034	12.026352	11.733229	11.626106	11.9008875	11.664173	11.562764	11.650543
"A_23_P103424"	3.8458047	4.062404	4.208019	3.984599	3.4565938	3.4799998	4.1945972	4.192056	4.708443	4.0410767
"A_23_P103433"	12.185497	11.499403	12.027696	12.223901	11.7316	12.182383	11.724035	12.593061	12.847363	12.394966
"A_23_P103442"	12.648763	12.648763	13.1789875	12.753129	12.793464	12.892466	13.024603	13.033586	12.85445	12.932563
"A_23_P103454"	13.5660305	13.269506	13.331024	13.62553	13.617006	13.501497	13.349785	13.189882	13.097874	13.282896
"A_23_P103465"	4.8818426	4.686661	5.844633	5.6865153	7.422508	5.4096994	6.3846207	7.9249973	5.668639	4.7864757
"A_23_P103476"	8.235179	8.303292	8.007628	8.145289	8.091242	8.520971	8.868806	8.429771	8.407189	8.46523
"A_23_P103486"	6.8981996	5.3868375	6.0882673	5.4052377	9.212908	8.80467	9.064692	7.686212	7.5342145	7.8935995
"A_23_P103496"	9.175861	7.6953783	8.468407	7.680765	8.504581	6.715628	7.959083	9.907548	10.53124	9.248401
"A_23_P103503"	9.284548	9.049192	9.15453	9.2504635	9.112613	9.06673	9.410699	8.846075	9.394512	8.885098
"A_23_P103511"	9.010624	11.93348	10.217495	11.039219	11.697794	12.359436	11.266089	7.7406464	9.4383545	9.050243
"A_23_P103522"	3.3606265	1.883171	2.1403859	2.6274073	3.8696787	2.480854	4.962743	4.184354	5.583448	3.9559505
"A_23_P103532"	7.583889	7.680765	7.1999288	7.9335527	7.4706597	7.3285594	7.478365	7.8590994	8.031723	7.893321
"A_23_P10356"	6.39509	8.218711	6.3979917	6.176972	6.020376	4.309622	3.973897	7.1170654	8.408032	8.120536
"A_23_P103561"	9.566934	10.120179	8.77965	9.311474	8.386803	8.078348	7.94587	8.468407	9.491219	9.20222
"A_23_P103571"	10.087156	9.712387	9.811264	9.803534	9.491479	9.407638	8.943533	9.616844	9.807666	10.006758
"A_23_P103588"	1.5721645	4.008894	1.6271536	1.7570531	1.5891967	1.6244214	1.6340172	5.5111804	2.1727364	2.7295809
"A_23_P103601"	12.156677	12.215922	12.688866	12.2109785	12.924456	13.017512	13.02075	13.041394	12.968434	12.818471
"A_23_P103617"	5.773663	5.051777	7.3143406	4.644958	4.293442	4.9667463	5.3831744	4.473639	4.0609193	4.3713427
"A_23_P103628"	9.204609	8.9660425	9.019572	9.172164	9.061569	9.107229	9.411079	8.901263	8.666942	8.775584
"A_23_P103631"	13.6287365	13.397329	13.640244	13.64941	13.187642	13.395388	13.527115	13.817905	13.827415	13.7067
"A_23_P103661"	12.483887	12.085023	12.614893	12.602146	12.458151	12.4677925	12.615851	12.401754	12.390931	12.338673
"A_23_P103672"	10.160836	8.533526	9.921292	8.829532	9.49556	7.63838	8.836608	10.32901	8.678506	8.818789
"A_23_P103690"	9.567153	9.626482	9.707384	9.600163	9.566934	9.807666	10.059708	9.690277	9.755599	8.742873
"A_23_P103698"	11.299762	11.907125	11.332273	11.6603	11.583588	11.490453	11.685292	11.34061	11.680281	11.694676
"A_23_P103703"	4.962534	4.281802	4.198263	5.168867	4.593546	1.6607282	2.7545028	4.547464	4.09998	4.4350195
"A_23_P103720"	4.153525	6.1332355	5.1284995	5.612791	4.900404	4.589712	4.0408006	6.318265	5.958559	5.5301466
"A_23_P10374"	11.790075	11.845509	11.821371	11.921952	12.153613	12.135409	12.301843	11.080325	11.492901	11.33094
"A_23_P103743"	6.135711	6.091448	6.345534	6.015696	6.1536307	6.6739855	5.79558	5.5827127	4.780152	5.643741
"A_23_P103756"	7.7149186	6.702963	7.8382397	8.048318	6.963645	7.108505	5.762193	6.9452515	6.942094	6.2568216
"A_23_P103765"	5.43658	5.00822	5.7200193	7.4194727	6.6709247	2.4942036	4.762179	7.0203958	7.193098	6.633642
"A_23_P103775"	5.945467	6.909456	6.164393	5.803947	6.6823425	4.949076	6.702963	7.053628	6.405315	6.286354
"A_23_P103787"	10.957455	10.611891	11.156089	10.938174	10.769466	10.58828	9.848382	11.617431	12.069105	11.739547
"A_23_P103795"	5.797811	4.0139832	5.099788	5.756601	6.3434305	5.063593	5.786972	6.3363514	5.5314817	5.993871
"A_23_P1038"	8.284744	8.374855	8.579615	8.326695	8.010554	8.196112	7.9484854	7.9640527	8.429771	8.447731
"A_23_P103803"	2.9989526	3.8051093	1.6174798	1.6461732	3.032586	4.171346	3.7925649	2.6947925	2.822481	2.9157112
"A_23_P103812"	9.711907	11.651254	11.947127	11.984712	1.9551852	10.551422	1.5243304	3.239994	3.155037	4.4529734
"A_23_P103824"	10.62528	10.293964	10.752447	10.904783	10.492658	10.671165	10.593675	10.558525	10.1304035	10.317429
"A_23_P103837"	8.322258	8.615076	8.368248	8.420155	8.061696	8.3530245	8.54772	8.363448	8.526913	8.159642
"A_23_P10385"	5.046837	7.660025	5.244671	4.910067	5.5910373	5.3897753	6.9226604	5.270383	5.387739	5.5908194
"A_23_P103864"	7.5844884	7.696031	7.7587585	7.893321	7.5173364	7.5108495	7.3495836	8.127949	7.771562	7.7137656
"A_23_P103877"	2.4795775	2.0330224	1.6105378	1.637408	2.1223693	1.6460955	4.8369236	3.7385004	3.06962	4.0086765
"A_23_P103885"	13.50511	13.903181	13.7423115	13.50803	14.202535	14.246184	14.296022	13.020057	13.532656	13.187642
"A_23_P103897"	5.7034206	6.144107	5.438001	6.2839046	5.6668186	5.7372856	5.92529	6.125113	5.116704	5.5874667
"A_23_P103905"	11.680518	11.89015	11.782482	11.988027	11.600336	11.952543	11.940064	11.649613	11.429812	11.853994
"A_23_P10391"	9.053227	8.631118	9.434087	9.489194	10.214113	8.637741	8.435954	8.943919	7.665088	7.658727
"A_23_P103919"	12.036596	12.270142	12.214837	12.3884535	12.052149	12.158367	12.468239	11.568227	11.059831	11.375513
"A_23_P103923"	8.522936	9.170757	8.47445	8.690855	8.174616	8.487219	9.065768	7.9511056	8.88419	8.441164
"A_23_P103932"	9.368498	8.904232	8.317799	8.50623	10.99575	8.14224	10.645986	8.420841	6.9152226	7.522831
"A_23_P103942"	10.7705	10.897217	10.561407	10.400869	10.297839	10.505477	10.581009	9.97107	10.142659	9.914505
"A_23_P103951"	10.118287	10.505175	10.359293	10.982888	10.966183	10.874514	9.873022	10.58828	9.971696	10.800665
"A_23_P103968"	10.935975	11.27129	10.9461155	10.723135	10.796775	11.304432	11.268382	10.691272	10.484545	10.8224945
"A_23_P103971"	3.6709356	1.5414197	3.633816	1.9102037	3.630258	1.576068	2.9724166	4.524991	3.0263937	3.6942163
"A_23_P103981"	13.765385	13.935639	14.176693	15.215186	15.293868	14.98238	14.407682	12.163808	12.598436	12.276985
"A_23_P103996"	9.416526	9.23512	8.955241	9.308688	8.253795	8.246569	8.089121	8.362885	8.381782	8.774931
"A_23_P10401"	6.604584	6.86409	6.45164	6.901222	6.282031	6.3405094	6.5100083	7.2768326	7.272401	7.238454
"A_23_P104012"	2.013461	3.161155	2.3372006	3.2799687	2.547343	4.0069003	2.6292295	3.8693826	3.1365516	1.5483038
"A_23_P104022"	10.224806	9.116367	10.196138	9.957561	9.623315	10.19382	10.200565	9.897335	9.752788	9.874725
"A_23_P104025"	8.533526	7.737957	8.606161	8.362021	8.0692835	8.693736	8.649519	8.167139	7.8178034	8.136772
"A_23_P104046"	9.92705	9.55248	10.057985	9.469846	9.365845	9.874395	9.938805	9.658506	9.664226	9.9382305
"A_23_P104054"	12.758354	13.876867	12.969524	12.456241	12.708944	13.635447	13.794004	12.533497	12.373655	12.483887
"A_23_P104065"	9.038906	8.998482	9.50229	9.032389	9.006595	8.908828	9.343312	9.360902	9.092575	9.412008
"A_23_P104073"	5.1766515	3.4880316	4.2269177	4.279866	4.8529363	1.9415412	3.9899626	4.26732	4.0057087	3.6567073
"A_23_P104086"	6.998061	7.0508757	6.905792	7.0450993	7.0115614	6.9987125	6.843919	6.559055	7.199715	6.525005
"A_23_P104098"	4.921146	5.340069	5.5150833	5.278381	4.822987	5.6664987	6.1554394	4.450307	5.2600727	4.2039013
"A_23_P104109"	9.438926	9.294709	9.54092	9.318141	9.584934	9.693086	10.262265	9.417078	9.789458	9.493867
"A_23_P104116"	13.490485	13.673633	13.25542	13.613167	13.400393	13.562686	13.700816	13.37397	13.359256	13.538204
"A_23_P104138"	6.531867	6.083851	6.149987	5.854422	6.890618	7.421907	7.073204	6.50807	6.9826584	6.7909307
"A_23_P104146"	10.449014	10.191839	10.37949	10.504068	10.591055	10.446079	10.482025	10.277183	10.494108	10.388302
"A_23_P104151"	9.650451	9.534636	9.670895	9.988855	9.699557	10.014446	9.800793	9.187423	8.758295	9.041811
"A_23_P104188"	6.7624955	6.5533147	5.5886445	5.219761	6.5137916	2.053181	5.1837573	6.366857	6.4453554	6.9158263
"A_23_P104193"	12.049002	11.232904	11.318615	11.429812	12.356472	12.350455	11.750668	12.96915	13.267428	13.188617
"A_23_P104199"	9.422634	8.610354	8.632242	8.637107	9.731056	9.619279	9.052989	10.098283	9.8194065	10.346031
"A_23_P104201"	11.733985	11.726404	11.684418	11.80641	11.733985	11.846965	12.0246	12.086103	11.958299	12.205286
"A_23_P104224"	3.2902775	3.4308217	3.1742682	3.1155276	3.7239082	3.703949	4.77818	2.7541015	3.310036	3.733622
"A_23_P104237"	3.578322	1.680556	1.4967945	1.4933711	1.497753	1.4916795	1.4958122	1.5211012	2.0034103	1.5106765
"A_23_P104252"	10.170249	9.948141	9.742067	9.7364025	10.823974	10.323271	10.112127	9.653512	9.239777	9.126077
"A_23_P104275"	2.0315113	1.8152713	1.6492002	2.7204053	2.0875626	3.0676725	3.0435712	2.7969983	3.7071116	5.030155
"A_23_P104282"	7.639763	7.994301	7.407733	7.4659815	6.918421	7.1854224	7.6154103	7.8575807	7.29214	7.9551105
"A_23_P104295"	9.605306	9.587568	9.591294	9.550501	9.341389	9.389099	9.735808	9.140907	8.591585	9.002829
"A_23_P1043"	3.691199	3.1350992	3.1906128	4.030137	5.9451747	1.5682456	2.2603896	3.2228332	3.8784242	4.2953134
"A_23_P104318"	12.022104	13.074461	13.373156	11.066042	13.419129	13.925943	13.516813	11.567396	11.907125	12.276985
"A_23_P104323"	10.210731	9.4251995	10.328044	9.729152	10.010771	9.579858	7.054421	10.060815	10.573967	10.274883
"A_23_P104335"	1.5607638	2.2593725	1.5745089	1.6084116	1.5449466	4.032392	3.782578	1.5987272	1.5643941	1.5940448
"A_23_P104346"	8.755793	8.408032	8.681812	8.139411	8.191847	8.379707	9.011021	9.014341	9.362485	9.1929245
"A_23_P104351"	11.816978	12.054461	11.893352	12.453927	11.665475	11.387418	11.625655	11.54325	11.578397	11.542715
"A_23_P104362"	12.59151	13.097874	12.946356	12.474705	13.978325	14.781446	13.84305	12.733276	13.019634	13.009204
"A_23_P104372"	11.267168	11.453693	11.377541	11.453253	11.088879	11.195136	11.31575	10.875976	10.924716	10.979994
"A_23_P104387"	11.737308	12.039023	12.043907	11.742931	11.787862	12.106979	12.059645	11.828609	11.346252	11.868077
"A_23_P104413"	15.276716	15.334973	15.136399	15.054899	15.285777	15.2265005	15.43796	15.48742	15.576003	15.314977
"A_23_P10442"	9.907146	10.567551	9.851649	10.526167	12.641638	12.896685	13.045759	11.086342	11.166208	11.18582
"A_23_P104438"	1.7556456	3.3091333	3.9953706	3.713917	1.791294	5.083228	8.397241	3.0147417	2.7528696	3.1383448
"A_23_P104445"	5.476387	4.5754457	3.2485893	5.006228	5.687025	5.377256	5.914583	5.879963	4.9318986	5.602947
"A_23_P104451"	11.76517	11.825277	11.916371	11.902111	11.68737	11.865632	12.017719	12.168767	12.186355	12.207647
"A_23_P104464"	10.059979	9.070731	8.159642	8.864335	10.343623	7.447437	9.5377865	9.097066	8.505039	8.722404
"A_23_P104471"	3.6042695	4.88878	5.058202	5.2761364	3.771	3.7882373	5.320846	5.171707	4.658268	4.9673357
"A_23_P104484"	4.3655634	9.950487	6.4335084	12.280042	4.387537	2.1381705	2.040676	8.893723	7.8467803	10.089636
"A_23_P104493"	6.293926	7.3840923	6.2495575	7.7936225	6.727066	4.845641	4.97839	6.850979	5.2166214	5.654545
"A_23_P104509"	6.215229	6.24698	6.015918	6.052953	6.0182915	6.546901	6.518899	5.870321	6.4347672	5.9207563
"A_23_P104522"	7.9866624	8.142118	8.658732	7.7058125	8.0187025	8.401938	8.650758	8.406805	8.661302	8.711152
"A_23_P104555"	7.0743093	5.5393405	4.8259315	4.7206607	3.6040363	7.8970437	4.3004584	6.423948	5.4043756	5.45626
"A_23_P104563"	9.248664	8.214855	8.491208	7.1027846	9.5729	8.1555195	9.139641	9.452983	9.565139	9.568367
"A_23_P104579"	9.287155	9.559131	9.05812	9.383323	9.15376	9.311323	9.059881	9.770937	9.888093	10.123844
"A_23_P10458"	4.592589	5.3242626	4.495376	4.148654	4.327936	4.962223	3.936156	3.5579188	1.6642159	2.9455092
"A_23_P104583"	8.394365	8.749578	8.4301605	8.109595	8.135423	8.100222	8.204179	7.4688625	7.3802557	7.514398
"A_23_P104594"	5.1092253	4.745992	5.1687226	4.883656	4.82481	5.574162	5.2071133	7.734863	6.948497	8.516582
"A_23_P104607"	10.598076	10.8748	10.714515	10.828928	11.204051	11.22769	10.980783	10.771614	10.369557	10.692041
"A_23_P104617"	10.090084	9.572318	9.803534	10.017942	8.0991125	8.527724	9.245525	9.110242	9.601624	10.069393
"A_23_P104624"	11.735768	12.294323	12.002768	12.646656	11.503141	11.86945	11.525947	12.068687	11.905998	11.777011
"A_23_P10463"	15.48742	15.515717	15.641762	15.503885	15.287452	15.371501	15.44126	15.429815	15.788651	15.552991
"A_23_P104641"	12.177621	12.053106	12.123336	12.2398615	12.276602	12.367002	12.202418	11.93348	12.053106	11.873051
"A_23_P104651"	7.2349844	8.275732	7.530931	7.804208	7.4673934	7.347892	8.795278	6.0001082	5.7093854	6.131739
"A_23_P104676"	12.184371	11.963118	12.13597	11.857358	11.793379	11.796319	11.951172	12.03454	11.44559	11.9017105
"A_23_P104689"	8.679319	8.534285	8.431407	8.5981655	8.58609	8.322491	8.394139	8.115786	7.6585584	7.878867
"A_23_P104692"	11.057668	12.143822	11.681911	11.742102	10.748536	11.010253	10.451645	11.05015	11.328073	11.046809
"A_23_P104705"	7.6610374	7.7060385	7.698834	8.362184	7.9828587	8.43959	8.634321	6.6387234	6.642991	6.549949
"A_23_P104734"	9.098858	9.624943	9.25815	9.947949	9.480797	9.967772	9.7378235	10.236131	10.406004	10.344357
"A_23_P104741"	4.825791	6.3939333	4.597554	4.654296	9.172164	6.411272	9.168511	4.7722387	6.2087946	4.856965
"A_23_P104762"	8.133064	5.685381	7.2484603	6.702963	8.15176	5.0993547	6.267089	8.973407	8.779229	8.5762
"A_23_P104798"	7.665885	6.0785437	5.4803853	4.7814994	7.4114747	6.9896135	6.6797876	6.265063	4.543353	5.4624076
"A_23_P104804"	8.748033	9.439721	8.77118	9.393574	11.617798	12.6325865	12.333273	9.628932	8.811772	10.380563
"A_23_P104819"	4.3832197	3.4392822	3.1584625	1.8476416	2.803736	2.0482333	1.5923685	4.3203826	3.5436924	3.1438322
"A_23_P104845"	4.3448844	5.739057	4.6489973	4.416265	3.9307456	4.6660676	5.62664	3.7397006	3.8331666	3.2968102
"A_23_P104853"	5.825388	6.2589097	6.681593	6.476527	6.270256	5.7011275	6.5141764	5.632949	5.552533	5.3478355
"A_23_P104865"	3.6661453	4.030137	3.634202	4.033078	3.9021692	4.768178	3.7401252	3.4108365	3.6536405	2.8161626
"A_23_P104876"	9.75412	9.933514	9.700765	10.418432	9.634041	9.739812	9.96845	10.194856	10.534933	10.158483
"A_23_P10488"	7.175799	5.181918	5.1722746	4.436663	3.5131507	3.0790339	3.5418613	5.8608775	7.193674	7.160614
"A_23_P104881"	7.8530016	6.815206	7.6595807	6.7928677	7.620182	6.3332295	6.915453	7.346333	6.6662283	6.924408
"A_23_P104892"	14.06199	14.1369915	14.140764	14.155328	14.214479	14.14325	14.42846	13.972914	13.580831	14.031049
"A_23_P104942"	11.203637	11.173031	11.366199	11.08318	11.406993	11.570675	11.636356	11.166208	11.176852	11.208087
"A_23_P10497"	10.064343	10.020227	9.912161	9.963418	9.972601	10.122309	9.826189	9.447273	9.39725	9.598737
"A_23_P104972"	1.7353594	1.9839131	1.7965232	1.846287	1.7583143	1.869534	1.7790593	1.8231902	1.733019	1.8306715
"A_23_P104996"	6.31396	6.2348223	5.8418217	5.506724	6.083166	5.4167886	5.9007506	5.4947705	4.942876	4.7192583
"A_23_P10500"	7.0506787	7.1472073	6.67936	6.8051257	6.2442336	7.100519	6.489154	5.8320937	6.070871	6.221424
"A_23_P105002"	10.057528	8.47036	9.396901	9.34008	8.720954	8.732638	9.398518	9.7826185	10.059708	9.726552
"A_23_P105012"	3.0101128	3.533539	3.5745013	3.5809689	5.2047024	3.0769944	4.735699	3.4325202	4.3271613	4.571984
"A_23_P105028"	6.660147	6.526304	6.622185	6.1997037	6.9944625	7.017086	7.511029	6.942367	6.968062	6.741877
"A_23_P105044"	10.951628	10.903844	10.962847	11.208087	10.911131	11.295755	11.105769	11.313638	11.882919	11.688432
"A_23_P10506"	8.049626	6.631788	6.3479395	6.2294855	8.673077	7.4127703	6.9493165	6.700496	6.3648543	6.545533
"A_23_P105066"	10.153122	10.853721	10.196395	10.690571	10.385483	10.7827425	10.858021	10.473711	10.476264	10.245002
"A_23_P105088"	3.005577	2.9605894	3.0751529	1.614282	2.9375615	1.5631635	2.5729368	3.2954245	4.0112667	3.310036
"A_23_P105118"	4.147387	4.240665	4.018764	4.547201	5.6130943	4.0296183	3.4349744	3.5297241	3.4598486	3.324577
"A_23_P105138"	10.244769	8.233152	8.4928665	10.241048	11.455549	10.697459	11.025079	9.949096	10.864521	10.644619
"A_23_P105144"	8.10397	9.836677	8.212721	9.36393	8.06505	8.386003	9.501026	9.803256	9.112975	8.904232
"A_23_P10518"	3.6842675	4.1111984	1.6479142	4.153525	3.0303206	3.7678678	4.5521035	5.675645	3.8626783	3.3291473
"A_23_P105184"	11.753296	11.907374	11.446883	11.559488	11.644419	10.922806	11.593048	10.990775	11.339371	10.852836
"A_23_P105197"	4.950576	5.34049	4.849482	5.0870037	5.256536	5.788998	5.492756	5.1200376	5.0898724	4.7282386
"A_23_P105212"	6.7476172	7.336994	7.684252	9.492945	5.7183237	5.6194787	2.8228295	3.2809923	4.6591697	4.2990203
"A_23_P105227"	7.6045456	7.9672613	7.383168	7.772186	7.288133	7.47084	8.162809	7.619315	7.78922	7.930898
"A_23_P10525"	1.6224693	1.6308467	1.6853052	1.7756402	1.6381766	1.7044686	1.6985025	1.6786852	1.6244214	1.6724422
"A_23_P105251"	6.4588366	3.3718286	6.642176	4.368162	5.405019	1.7617087	4.9206767	6.042836	5.773663	4.3926067
"A_23_P105264"	9.056875	8.511299	8.672254	8.491208	9.016666	8.852547	8.899314	8.340577	8.78826	8.802916
"A_23_P105276"	9.071351	8.898244	8.954252	8.774686	8.612005	8.889937	8.8702755	9.066594	8.9660425	9.265981
"A_23_P105307"	6.4430547	7.190783	6.797763	6.6179223	7.155325	7.3459735	7.5788546	6.642176	7.017086	6.180664
"A_23_P105313"	11.45001	11.531247	11.21772	11.632942	11.539498	11.8448105	11.840102	11.41075	11.234924	11.286598
"A_23_P105368"	8.061904	7.2361813	7.7688966	7.5859942	6.142567	6.6128883	5.989259	6.4886484	6.423948	7.011359
"A_23_P105382"	6.8093944	6.965979	7.371727	7.539654	7.14377	7.4512196	7.7426496	8.030422	8.139609	8.084075
"A_23_P105392"	13.750172	13.455695	13.658172	13.469393	13.52527	13.531219	13.597116	13.46589	13.417919	13.582141
"A_23_P105409"	8.805638	9.21841	8.903157	8.814405	9.350572	9.562248	8.748909	8.238821	8.72995	8.507353
"A_23_P10542"	4.2061086	3.1020925	3.211207	4.024837	7.145184	2.1274407	2.2747645	4.811513	4.0410767	3.2777839
"A_23_P105423"	4.3718762	3.8853836	4.0168505	4.297823	4.7406254	4.3993235	4.7314363	3.589207	4.223271	3.937652
"A_23_P105436"	7.139093	7.5660014	7.5047836	7.292436	6.9938765	7.6971917	7.672049	7.3183064	8.204518	7.4875865
"A_23_P105442"	9.540277	7.8545156	8.512624	8.023332	10.512355	7.490271	8.323899	10.088558	9.072881	9.049359
"A_23_P105453"	2.5833194	2.4668415	3.033889	1.9860507	2.537294	2.3847225	2.4835715	2.2808554	4.5521035	2.5936
"A_23_P105461"	7.8015223	6.197993	6.020376	5.7839656	7.6323466	6.477383	6.8377666	7.623641	7.3448205	6.209717
"A_23_P105465"	6.34453	4.9244313	4.421528	4.405147	6.5170317	5.2065487	5.591599	5.9059143	5.5357733	4.6443043
"A_23_P105475"	1.9172523	1.5263553	1.5615128	1.5569135	4.4681168	1.570911	1.5440444	1.560269	1.9230587	1.5773696
"A_23_P105495"	7.583617	7.3958035	7.502778	7.220592	7.323732	8.023332	7.9260406	7.4874463	8.120349	7.6440225
"A_23_P105519"	10.999666	10.842268	11.076762	10.767472	10.721083	10.862547	10.56729	10.520659	10.354389	10.459249
"A_23_P105524"	1.5625637	1.5864438	1.6530313	1.7650056	1.6056235	1.6603494	1.6891844	1.5846128	1.5641233	1.5704033
"A_23_P105535"	7.823903	7.6013904	7.8172565	7.8622017	7.5195503	7.897541	7.1612434	8.098698	8.080763	8.312471
"A_23_P105545"	3.7645824	4.1378145	2.512913	1.7515994	3.0633402	4.697335	2.732308	3.2260814	2.52973	2.7477083
"A_23_P105562"	12.64109	11.405068	12.436394	11.637847	13.942168	11.275018	12.274664	12.290005	9.584424	8.541803
"A_23_P105571"	8.199402	8.401938	7.911564	8.230714	7.523321	6.0904775	7.56669	8.542239	7.865252	8.212721
"A_23_P105583"	8.638527	8.842295	8.814405	8.834988	8.074993	8.271211	8.086953	7.5324063	6.9944625	7.7239313
"A_23_P10559"	10.102516	10.016112	10.948401	10.467911	9.551718	9.33754	9.133819	10.704955	10.6329155	10.415668
"A_23_P105592"	11.878463	11.630367	12.267668	11.881881	11.591276	12.010035	12.352701	11.522557	11.974222	11.833305
"A_23_P1056"	8.192192	8.115456	8.268834	8.152568	7.932349	8.040573	8.424673	8.780821	8.146468	8.438077
"A_23_P10561"	4.0162964	4.0001593	4.98916	4.3902035	3.3043919	3.3299253	4.3832197	4.5116563	4.1133394	4.5521035
"A_23_P105619"	9.894534	10.717667	10.236311	10.612085	10.792744	10.837478	11.430183	10.385986	10.029888	10.304961
"A_23_P105625"	10.287437	10.429295	10.406836	10.537772	10.791816	10.691839	10.780923	10.54854	10.948768	10.677451
"A_23_P10564"	2.268808	1.901647	2.1641722	2.6186595	3.1719785	2.4831204	2.255933	2.1704838	3.0839114	2.4032393
"A_23_P105646"	8.067947	8.053817	7.9009123	7.84863	7.965586	8.086953	8.321177	8.19714	8.422593	8.285011
"A_23_P105651"	3.8358734	9.570482	8.949684	7.941033	6.342926	9.521075	2.1625113	7.235449	7.9780755	6.9226604
"A_23_P105664"	10.563623	10.365662	10.585123	10.681024	10.561214	10.6416235	10.677114	10.42745	10.440075	10.606352
"A_23_P105691"	2.654471	3.4521286	2.6340153	3.447378	2.9762568	3.8257556	3.2550454	3.1976407	4.0946565	3.547312
"A_23_P105705"	3.99911	3.8705854	3.2458625	2.9960203	3.1217666	3.4223943	4.01933	2.3761864	3.5196686	1.7358457
"A_23_P105730"	6.253163	6.132344	6.5873785	6.380021	6.7790346	7.386739	7.030493	7.3185163	8.606669	7.8807144
"A_23_P105732"	13.144982	13.036195	13.15474	13.016349	12.931615	12.965834	13.096461	13.230778	13.387311	13.232541
"A_23_P105747"	8.23762	8.75203	8.340788	8.141939	8.557179	9.1831045	7.808908	8.915502	8.503134	8.154836
"A_23_P105753"	9.961181	9.968799	10.3171015	10.017584	9.661907	9.990556	9.924855	9.3500595	9.043501	9.501507
"A_23_P105794"	5.8787527	6.072308	3.9210002	5.068329	5.6348453	4.654922	5.4870367	5.7466693	5.9649944	5.3986034
"A_23_P105803"	7.1107397	3.73461	5.6898537	3.1861134	10.558525	3.9963162	3.233789	10.748998	9.721168	10.703822
"A_23_P105815"	9.419818	9.374511	9.603307	9.426052	9.593446	9.135431	9.067223	9.096112	9.204609	9.276744
"A_23_P105833"	10.550442	10.515501	10.406472	10.228347	10.341664	10.460577	10.618571	10.2563305	10.085558	10.263636
"A_23_P105856"	5.2218275	5.916312	5.9583883	6.0887585	7.0225787	7.290514	7.3662033	6.0942364	6.298241	5.9590807
"A_23_P105862"	12.304243	12.341479	12.373101	11.933936	11.789561	12.01578	11.834189	11.401716	11.718858	11.52091
"A_23_P105873"	2.1691394	2.695533	4.059703	4.4895267	4.2586455	3.2532248	2.3052733	3.6028438	3.091545	2.3046749
"A_23_P105886"	4.5680375	2.3973303	3.5183518	3.4852371	2.64024	2.9198713	1.8324138	5.0877905	3.0156288	3.0477228
"A_23_P105900"	12.387956	12.345136	12.31513	12.4901495	12.5051775	12.402159	12.088282	12.497438	11.856235	12.309365
"A_23_P10591"	8.796986	7.126782	7.9878187	7.857273	11.780965	6.582178	8.283178	11.711924	10.0443	10.305165
"A_23_P105923"	2.7345445	1.644649	5.1343565	1.5536869	7.6831813	1.534344	1.5366987	7.112454	2.013461	3.0861664
"A_23_P105939"	3.7177556	3.1620939	3.0407705	1.9845845	3.4990501	3.2250743	2.342042	2.900778	4.225847	2.4235945
"A_23_P105957"	11.762465	11.276408	11.543808	11.215699	10.611113	8.998083	9.381773	10.6588955	10.557921	10.5370655
"A_23_P105963"	6.6723657	5.9212637	5.22018	7.092505	5.5574427	7.3862553	8.0375805	7.515256	7.0822663	6.9481487
"A_23_P105973"	2.1806977	2.134267	1.574719	1.613846	2.1580992	1.5669665	8.238927	1.5909258	1.8615439	1.588348
"A_23_P106"	7.893321	7.8451614	7.998807	7.701746	7.7140794	7.995755	7.1987967	7.2803793	7.644226	7.356877
"A_23_P106002"	13.819498	13.718589	13.686313	12.156677	12.624494	15.278683	15.656584	12.670806	13.132879	12.865009
"A_23_P106016"	8.534891	9.089119	8.503134	8.763275	9.487464	9.632938	9.6353445	9.6611805	9.078453	9.255514
"A_23_P106024"	10.004399	7.476588	9.504524	8.529566	9.360211	10.079668	10.452083	8.926617	9.330555	9.763425
"A_23_P106042"	6.2794986	3.3705888	4.0954204	3.770045	5.158912	4.9969873	6.560302	4.9204164	6.6709247	5.829212
"A_23_P10605"	6.088161	4.0454135	5.2640333	4.795242	6.479976	4.1597443	5.389199	5.9636397	5.39023	5.5810223
"A_23_P106056"	13.688139	13.750172	13.728442	13.728442	13.754343	13.70332	13.769203	14.036624	14.053681	14.189508
"A_23_P106069"	4.5942945	4.355501	4.00541	4.185845	5.1766515	3.7874272	3.882685	4.1960754	5.0843773	4.255828
"A_23_P106080"	3.9661481	4.1339355	3.8416617	3.936156	3.637073	3.8508093	4.2551894	3.469016	4.2238345	2.838323
"A_23_P106103"	2.6652923	2.9998949	3.771	3.4385915	3.62232	3.6786997	3.592386	4.9104977	4.545024	4.963296
"A_23_P106117"	11.965022	12.53582	12.776329	12.65129	12.260216	11.935051	11.960821	11.482874	11.524787	10.853088
"A_23_P106127"	10.332103	10.378608	10.416909	10.315453	10.18123	10.590706	10.4129095	10.977022	11.323728	10.799971
"A_23_P106131"	13.642862	13.667015	14.05023	13.51131	13.357472	13.665347	13.688139	13.521322	13.4465685	13.451641
"A_23_P10614"	5.862729	6.7793493	6.3077893	6.2895527	6.1785774	6.2479944	7.8348036	5.5660677	5.785298	5.632949
"A_23_P106145"	8.965139	9.938805	10.41409	11.430183	9.357317	9.301485	10.280739	9.1875515	9.456331	9.504109
"A_23_P106158"	7.2909155	7.4606037	7.9014807	7.619315	7.7036057	8.396854	7.977773	7.799017	6.7272987	7.248002
"A_23_P106162"	8.630093	9.232081	8.941851	9.232081	7.828495	7.896411	7.7468643	7.9081645	9.090639	8.335712
"A_23_P106174"	6.5258803	6.7824674	6.5068893	6.6878552	6.81696	6.809914	6.6790743	6.5802965	7.2216825	6.8267426
"A_23_P106194"	8.584673	10.613434	7.0959353	10.63607	14.303578	8.167274	13.318128	13.692278	13.878323	13.859092
"A_23_P106204"	8.67439	9.910367	8.808281	9.375999	9.90836	10.044736	10.410581	8.923828	9.157023	9.0367985
"A_23_P106226"	11.928546	11.923964	12.073616	12.018986	11.964087	12.019339	12.095941	11.898748	11.738981	11.979166
"A_23_P106236"	2.000107	2.985866	2.705467	2.0955086	2.1518674	3.6982353	1.7016407	2.3304105	2.5369444	3.531766
"A_23_P106241"	9.78756	9.3626995	9.457028	9.64298	9.680899	9.722816	10.492357	10.382721	10.609154	10.494332
"A_23_P106258"	5.805761	5.9786987	5.635132	5.995146	5.6443267	5.9520574	6.007125	6.758491	6.222308	6.259322
"A_23_P106280"	11.7676325	11.8663	11.997288	11.336793	11.002946	11.536371	10.898494	11.499035	11.383537	11.211786
"A_23_P106299"	14.091517	14.449758	14.557768	14.550355	14.278227	14.283495	14.565687	14.045896	14.448456	14.261809
"A_23_P106322"	11.669329	11.6476	12.258527	12.072484	11.8598585	12.090904	12.29509	12.310277	12.6664505	12.370188
"A_23_P106362"	5.1815476	6.543018	4.7468257	5.335064	8.244571	6.143141	8.930653	4.10512	3.9868171	2.5275984
"A_23_P106371"	6.2395487	6.297721	6.2616563	6.098878	5.229625	5.6563797	5.2189713	6.082251	5.7181473	5.607762
"A_23_P106389"	10.729365	9.1776085	9.462991	8.366917	3.5483022	5.754947	4.172234	4.171346	4.236288	4.537707
"A_23_P106391"	8.640277	8.739717	8.870661	8.519392	7.8537664	8.028217	8.1632	7.2703786	7.647976	7.6614046
"A_23_P10640"	5.1158586	4.9951744	4.6033764	5.034175	4.9035444	5.9622188	5.5585523	4.786711	5.7891016	5.06438
"A_23_P106405"	12.002426	11.549009	12.522562	11.740791	11.557672	10.889526	10.865853	12.857278	12.555074	12.644621
"A_23_P106412"	9.594524	8.686578	8.830641	8.558731	8.249549	5.670456	7.6800737	10.118555	10.104733	9.971298
"A_23_P106425"	8.008501	8.004978	7.733738	7.506768	7.477973	7.223467	7.0863223	7.07609	7.5514026	7.3245897
"A_23_P106433"	10.18841	9.881583	9.610713	9.564183	9.570076	10.03875	11.02757	8.656611	9.23512	9.169487
"A_23_P106439"	8.933489	8.987659	8.344779	8.334438	8.532097	8.881094	9.733438	7.327415	7.7468643	7.6976275
"A_23_P106463"	11.958972	12.929993	13.133924	13.029306	12.925125	12.957858	11.863025	12.644062	12.585746	12.613008
"A_23_P10647"	6.265999	5.6110334	4.89953	4.841488	8.180177	7.3130364	1.6463692	6.8179965	5.073006	5.4197826
"A_23_P106472"	16.027422	16.249605	16.165537	16.05301	16.115108	16.135014	16.65012	16.297487	16.467867	16.110123
"A_23_P106481"	12.9748535	13.020057	13.049487	13.001939	12.956789	13.185209	13.00657	12.972135	12.705036	12.996909
"A_23_P106497"	8.149522	8.153803	7.9864864	7.7163196	8.163009	8.48817	8.407403	7.6685038	8.302448	7.8459516
"A_23_P106505"	9.930377	10.083817	9.84432	10.143042	9.50732	9.657465	9.510245	9.691967	9.644131	9.59298
"A_23_P106522"	10.290219	9.884481	10.127705	10.096352	10.096101	10.017942	10.135118	9.919973	9.832294	9.861347
"A_23_P106532"	11.674036	11.013979	11.606358	10.818611	10.60103	10.379666	11.112614	11.685818	11.5009365	11.503141
"A_23_P106544"	12.266114	13.035546	12.792261	12.613705	12.425026	11.75668	12.404602	11.795874	11.864678	11.936854
"A_23_P106559"	6.0622272	6.1219873	5.7999325	6.118947	5.928802	6.4116583	6.052953	5.822658	6.4354224	5.6541834
"A_23_P106562"	8.995888	8.020367	9.052989	8.014576	7.675411	7.4723597	8.330595	8.274131	8.345304	8.692985
"A_23_P106575"	11.558514	11.873749	11.816978	11.655633	11.873051	11.7946005	12.090231	11.43279	11.165773	11.230344
"A_23_P106602"	5.5014725	4.48341	5.613326	5.1057653	7.4057736	5.904114	4.9244313	5.9341636	3.8735697	4.062901
"A_23_P106617"	7.5508547	7.888139	9.127581	7.5756865	7.888139	5.1004443	6.613165	8.098885	9.115224	7.936085
"A_23_P106629"	9.331356	6.9932227	6.2492266	6.2661805	8.757759	7.4789443	8.430739	5.9443846	6.019516	5.8060913
"A_23_P106633"	11.206043	10.745683	11.314003	10.870032	10.614867	10.870597	10.744348	10.783579	10.790499	10.443429
"A_23_P106656"	4.493508	4.59045	4.10512	4.3429785	4.230756	4.455649	4.505394	3.1506763	3.8116004	3.5100658
"A_23_P106661"	6.070871	6.5115175	6.6915765	6.7559013	6.193611	6.706207	6.543018	5.5423975	5.9230604	5.759159
"A_23_P106663"	3.534923	4.4634542	4.6706457	4.3456564	4.0236764	3.9776826	4.153525	1.577067	1.9412951	3.046379
"A_23_P106675"	7.2922606	6.6305676	7.0784945	6.396718	8.179138	6.3171077	7.0959353	6.734997	7.3241124	8.3097725
"A_23_P106682"	10.338601	7.9567757	9.323042	8.673728	10.168161	8.113725	8.916965	11.707938	11.151901	11.61699
"A_23_P106694"	10.439433	10.645986	10.37008	10.413295	10.540594	10.650012	10.806994	9.92312	10.082814	9.736159
"A_23_P106708"	17.675472	16.92359	17.675472	17.269207	17.817421	17.543158	17.269207	17.569923	17.37422	17.715841
"A_23_P106720"	7.274556	7.415623	7.5977974	7.007779	7.2237887	7.5763845	7.614475	6.188437	5.754292	6.3579164
"A_23_P106727"	11.607041	11.684883	11.404843	11.698391	11.601583	11.944937	11.923964	11.291498	11.196603	11.415367
"A_23_P106737"	10.882897	10.784047	10.694085	10.481121	10.651682	10.890336	10.979118	10.557577	11.146331	10.586196
"A_23_P106741"	12.669406	13.029306	12.7668	12.837945	12.433298	12.589496	13.014557	12.654574	12.5282135	12.589496
"A_23_P106761"	8.238927	8.510834	7.7412333	7.700374	9.586788	7.879394	9.23302	8.167354	8.50666	7.9272847
"A_23_P106773"	11.866968	11.021227	12.1262455	11.339913	10.74476	10.902356	10.593262	11.776061	12.378722	11.524787
"A_23_P106798"	8.214364	8.017466	8.1848345	8.18551	8.184534	8.370306	7.9571433	8.043658	8.177472	7.9964914
"A_23_P106806"	5.825637	5.5827127	5.600748	5.463733	5.281297	5.211151	5.9619355	5.210368	5.928583	5.487176
"A_23_P106814"	5.425346	3.42047	4.9153185	2.912081	3.3346045	3.1976407	2.4364047	1.5121615	3.6187725	3.6742404
"A_23_P106822"	9.732398	9.519154	9.768092	9.471723	9.837457	9.535004	9.66174	9.754431	9.338708	9.355956
"A_23_P106835"	12.267668	12.567626	12.546193	12.560112	12.24281	12.348343	12.254677	12.314415	12.298206	12.0803
"A_23_P106844"	14.979241	14.455941	13.69915	13.709081	13.914355	14.19378	14.75283	12.701198	12.911657	12.300422
"A_23_P10685"	11.80507	12.005999	12.187221	11.833305	11.639447	11.715898	11.774964	11.375967	11.832566	11.375967
"A_23_P106859"	11.589672	11.842243	11.833742	11.772328	11.66914	11.363526	12.019339	11.509745	11.555774	11.588143
"A_23_P106874"	5.2976217	7.8453407	6.0087585	7.520628	4.9991074	5.6758738	4.6402946	4.7354355	5.3767443	5.0533786
"A_23_P106887"	11.114493	11.682863	12.214072	11.948716	11.816432	11.833742	10.223414	11.320666	11.478677	11.282889
"A_23_P106898"	8.448204	8.46719	8.867119	7.597985	8.354922	8.091055	8.358709	7.556817	7.495701	7.58156
"A_23_P106906"	9.781567	8.432105	8.8865385	8.212561	8.5111265	10.822043	9.373383	9.669106	8.948835	9.997052
"A_23_P106922"	9.917022	6.1469183	8.876783	6.873122	7.474979	5.3070183	6.797066	8.259925	9.457744	8.41183
"A_23_P106933"	4.167786	4.8547006	4.542045	6.8791637	3.3236492	2.7269623	1.7601144	2.4353795	4.1232057	3.5517337
"A_23_P106945"	4.4299436	3.5213995	3.2964022	4.582579	5.196788	3.6928408	4.1411114	3.7655315	4.182352	4.062056
"A_23_P106973"	14.0228405	13.839545	14.505264	13.721787	14.271853	14.765815	14.253417	13.803509	13.771918	13.343513
"A_23_P10699"	7.9907646	9.018059	8.522716	8.99615	7.3968554	8.055134	7.454662	6.805373	5.584454	6.894945
"A_23_P106998"	9.710158	9.853214	9.997052	9.649925	9.267096	9.716125	9.814903	9.256971	8.905209	9.438116
"A_23_P10701"	8.539351	9.251548	9.474431	9.251712	9.193384	8.14111	8.3228	9.332208	10.952099	10.059979
"A_23_P107036"	11.685292	11.422708	11.564099	11.494605	11.631003	11.59919	11.8369	11.578016	11.570093	11.697794
"A_23_P107048"	8.481822	8.861737	8.313328	8.416747	8.231736	8.456908	8.599139	8.896264	9.368043	8.897446
"A_23_P107051"	9.8475065	9.649175	10.653444	8.694756	7.7382827	9.875956	8.047781	9.199728	9.641561	9.047045
"A_23_P107064"	6.920145	6.376796	6.9985123	6.3352146	5.949939	6.6486616	5.9776254	5.929505	5.812046	6.1961083
"A_23_P107073"	11.769295	11.9008875	12.085598	11.824163	12.205913	12.728618	12.6664505	11.890658	11.783414	11.879735
"A_23_P107087"	8.599139	8.326695	8.393119	7.890714	8.022263	8.47036	8.4815855	8.207708	7.810065	8.553946
"A_23_P107102"	2.5896537	3.221619	2.3770342	1.5665736	2.2271173	2.8965635	2.6492982	1.5782804	2.5491867	1.6104653
"A_23_P107116"	8.135113	10.099677	10.674983	11.305317	6.2794986	6.230426	6.460306	10.630678	11.266089	10.134408
"A_23_P107132"	2.4034991	2.4326482	1.5711186	5.794856	2.4161434	1.7234608	1.6607282	1.6260788	2.4530404	1.612458
"A_23_P107154"	9.1551075	9.63865	9.664692	9.310557	9.220013	9.141523	9.182249	9.175281	9.254995	9.238916
"A_23_P107166"	8.053502	7.9966316	8.031996	7.3285594	7.406103	7.67191	7.760508	7.433792	7.583889	7.428571
"A_23_P107173"	2.3973303	2.1625113	3.4734032	3.711027	5.9900713	2.7857919	1.7249101	3.680295	3.2625012	2.5989442
"A_23_P1072"	13.866423	14.407682	14.14325	14.663943	14.070402	13.932357	13.093794	13.97725	14.10784	13.640942
"A_23_P107206"	7.1322227	7.7326527	7.4151573	8.079586	9.056443	8.996359	8.717757	8.486705	7.968799	8.419537
"A_23_P10721"	3.201833	1.7434593	4.0220184	4.7198563	2.5592413	1.5480652	4.4739275	3.0856776	2.7764993	2.9920497
"A_23_P107211"	8.3887005	7.217294	6.964978	6.72834	6.7519608	7.2476263	8.793604	6.6394367	6.801948	6.1661367
"A_23_P107214"	9.604783	8.521631	8.276273	8.256139	8.265577	8.638527	9.906297	8.33135	8.536377	7.9741893
"A_23_P107238"	8.323667	7.957756	8.627768	8.105562	8.471469	8.144887	8.337098	8.073967	7.9416127	7.680201
"A_23_P107247"	4.7502775	6.617717	6.1070414	7.9876556	7.338337	4.929378	5.3673034	6.352392	5.0761256	4.799033
"A_23_P107257"	10.119852	9.9452095	10.258088	10.172595	10.107533	10.294406	10.257786	10.166011	10.201818	10.126876
"A_23_P107283"	5.2269144	3.9641156	4.3542957	4.391372	6.7707376	5.3201404	5.631873	5.4407263	4.35581	3.9438713
"A_23_P107295"	10.592702	10.840193	10.8135	10.305376	10.751091	10.510332	10.912847	10.378907	10.974619	10.517568
"A_23_P107307"	6.4483886	6.3814216	6.1626077	5.957344	6.6925273	7.118088	6.6575866	6.1081505	6.0461493	6.1732807
"A_23_P107313"	10.52222	10.741555	10.740321	10.42864	11.034266	11.260158	11.077449	10.437258	10.150244	10.707641
"A_23_P107322"	9.04535	10.34776	10.17619	10.445694	11.022457	12.218488	12.298513	8.685307	9.089475	8.632242
"A_23_P107336"	3.609601	3.6794217	4.0359282	3.3015	5.2121162	4.0062914	5.422532	3.9903178	4.108576	3.7663279
"A_23_P107350"	4.2069306	2.3297446	4.004163	3.9453058	3.6611545	4.1255856	4.150145	4.9233637	5.9305334	6.3606844
"A_23_P107351"	16.731693	16.900856	17.149849	16.780334	17.543158	17.490082	17.3247	16.65012	16.66544	16.65432
"A_23_P107369"	11.841009	10.906727	11.554846	11.343107	11.508187	10.451311	11.044478	12.513053	11.912843	11.91671
"A_23_P107373"	9.0585785	9.412725	9.457744	9.072388	8.876152	9.293727	9.364151	8.741784	8.502334	8.577568
"A_23_P107394"	15.189791	15.43796	15.3208	15.292405	15.397631	15.262877	15.696642	15.593369	15.708494	15.375656
"A_23_P107401"	14.605152	14.353335	14.663943	15.255577	14.034083	14.869809	15.312754	13.890778	13.89524	14.209435
"A_23_P107412"	12.613008	12.5877285	12.282448	12.643541	12.728164	13.609911	14.055807	13.515636	13.212355	13.54923
"A_23_P107421"	8.080465	9.077074	7.9394484	7.8453407	8.996719	7.826972	9.939641	6.928894	7.147414	7.38901
"A_23_P10743"	7.4541535	7.52668	7.818609	7.237246	7.664201	7.4938097	8.152568	6.666045	6.312758	6.8384
"A_23_P107432"	5.769956	7.5699015	5.624565	6.8987465	6.819995	7.4281425	6.4172864	6.2296953	6.0015016	5.3418455
"A_23_P107443"	1.5020949	1.500533	1.4995975	1.4938136	1.5065897	1.4978974	1.4954766	1.5216361	1.5099642	1.5171632
"A_23_P107454"	3.6438606	3.265893	3.8942695	3.6785102	3.2944362	4.2329264	3.5525043	4.067476	4.3710713	4.0609193
"A_23_P107465"	6.0064483	6.1732807	6.0840797	6.197993	6.0251675	6.4357324	6.326988	5.8246183	6.2404013	5.928802
"A_23_P107483"	4.6332464	4.7095075	4.788253	4.97839	4.6102033	5.1144094	4.7067003	4.5544477	4.859898	4.1974483
"A_23_P107507"	10.613718	10.887785	11.002283	10.153894	10.114338	10.700318	10.555391	10.926738	11.551703	10.6453495
"A_23_P107513"	6.745574	7.1693664	7.382889	6.953934	7.424925	7.3292828	7.4034643	7.665672	7.2506466	7.451491
"A_23_P10753"	3.5183518	4.7888227	4.0836864	3.3914843	1.7017941	4.3938026	3.2876773	5.777288	5.8078523	5.1598043
"A_23_P107531"	7.002205	6.901222	6.2685547	6.9390097	3.9194517	3.7891018	3.1084783	5.0590997	5.8399925	5.828697
"A_23_P107552"	10.492039	10.527136	10.65948	10.429515	10.471144	10.682998	10.508906	10.778547	10.222691	10.630678
"A_23_P107565"	6.285586	4.6461062	1.5345955	3.06815	5.3610168	7.219351	5.1179223	5.5301466	5.181399	5.4167886
"A_23_P107578"	5.0208855	5.0023675	5.672964	5.5827127	4.7985415	5.7455344	5.710663	4.594651	4.179968	4.7924423
"A_23_P107587"	9.623139	9.060517	9.002829	8.712008	9.270615	10.186431	10.060978	9.472881	8.954091	9.150034
"A_23_P107597"	3.1416664	1.8259593	2.053181	2.4572136	3.1438322	2.3089042	2.140782	5.301716	4.044577	4.837467
"A_23_P107612"	7.2837067	7.548076	7.0350795	6.7641706	3.8626783	4.0050883	4.416466	5.7841616	6.753364	6.3466554
"A_23_P107623"	1.4978029	1.49562	1.4930828	1.489165	1.4994075	1.4919858	1.4915205	1.5112286	1.5024343	1.5076183
"A_23_P107644"	12.577185	12.535099	12.690402	12.696758	12.5877285	12.524135	12.618057	12.843663	12.957858	12.922263
"A_23_P107653"	13.512093	13.667859	13.920007	13.829214	13.795095	14.015232	13.540277	13.332785	13.684897	13.502666
"A_23_P107661"	11.523741	11.958299	11.814565	11.872649	11.497504	11.544835	11.640258	10.807925	11.110465	10.985527
"A_23_P107673"	7.4988074	7.907017	7.501413	7.78502	7.6887445	8.35414	7.7978554	7.101048	7.418252	7.3622947
"A_23_P107684"	9.874725	9.699733	9.693211	9.708884	9.397555	9.603604	8.301317	9.592779	9.85814	9.507933
"A_23_P107693"	7.273214	6.985261	7.1704373	6.6974854	6.8626356	7.3409624	6.837299	6.2906857	6.2879767	6.3911166
"A_23_P107701"	11.397071	11.751314	11.318291	11.516085	11.676377	11.738452	11.963662	11.519729	11.242036	11.501637
"A_23_P107714"	9.465818	9.187166	9.66174	9.158305	9.351828	9.383866	9.23171	8.885781	9.000638	8.833265
"A_23_P107724"	9.736648	9.462734	9.925124	9.891059	9.957705	10.069076	10.219127	9.562028	9.201878	9.332208
"A_23_P107735"	12.130784	12.071337	10.0737505	11.208794	11.400648	10.971873	11.558225	11.244742	11.541518	11.214875
"A_23_P107744"	3.1036136	1.9630342	3.62232	4.152901	3.383871	1.6001257	4.133629	4.4962106	4.303909	3.239487
"A_23_P107750"	1.7509797	1.7461307	1.8862412	2.1616921	1.8424829	2.0108895	1.9226751	1.8245693	1.7756402	1.8610997
"A_23_P107763"	9.543855	9.387571	9.195728	9.317959	9.03117	9.2173	8.96818	8.936697	9.209384	8.431407
"A_23_P107775"	11.173031	9.021746	12.434326	7.810065	8.26185	4.662202	5.2691884	8.494886	10.238793	10.908686
"A_23_P107795"	11.925912	10.842714	12.089255	11.0594845	11.538567	11.650899	11.564099	11.134569	11.163204	11.196947
"A_23_P107801"	10.403071	9.575087	10.069896	9.810663	10.378217	9.879368	10.4537525	10.626149	10.855349	10.169868
"A_23_P107847"	3.884322	3.0790339	3.4026613	1.5222564	4.377543	3.441258	4.2944665	2.3602626	3.1915405	2.7661216
"A_23_P10785"	6.714182	7.25193	6.583984	6.706108	6.7768984	6.7267246	7.509783	6.4496484	7.022024	6.5906353
"A_23_P107855"	8.010939	7.8459516	8.209427	7.7408633	8.040212	8.351837	8.347856	7.3622947	7.4352074	7.2571383
"A_23_P107881"	6.234179	6.601763	5.5271926	6.5065007	5.844633	5.662676	5.7571583	6.7415137	6.233925	6.5819073
"A_23_P107894"	9.71319	10.405013	9.96148	10.864521	10.324229	10.409614	10.113002	10.233848	9.9952345	10.045529
"A_23_P107903"	12.200316	7.5094833	11.1683445	9.061155	8.036493	6.8612375	7.8195634	10.556944	10.668127	10.740569
"A_23_P107911"	9.498339	5.047561	11.457466	8.862419	5.657206	1.98406	3.8176482	6.2613263	8.261268	7.1862454
"A_23_P107933"	8.717991	9.438116	8.06281	8.880892	8.489117	8.9056225	8.917385	7.9492483	7.269278	8.559392
"A_23_P107942"	8.499054	7.9451284	8.606954	8.181392	8.276943	8.503785	8.769621	8.523337	8.456908	8.818568
"A_23_P107959"	11.893625	11.708646	12.352246	12.036167	12.12707	11.9302845	12.124591	11.834654	12.096743	11.656224
"A_23_P107963"	11.19976	10.063925	10.963949	11.804024	11.44559	11.253381	11.758271	9.557573	10.210731	10.425679
"A_23_P107974"	4.7871222	5.3749866	4.946856	5.729429	4.763273	5.320846	5.069347	4.0379806	5.477618	5.414011
"A_23_P10798"	5.3552656	5.8622947	5.950642	5.367607	5.846136	6.329846	6.319747	5.015472	4.562927	4.8815403
"A_23_P107981"	2.9389632	3.2950897	3.5204387	3.5249448	3.3307407	3.261437	3.8522418	3.0967247	3.683989	3.686435
"A_23_P107994"	11.049324	11.051012	10.927666	10.858342	11.171646	11.496142	11.532153	10.712137	11.319514	10.8248
"A_23_P108028"	8.644074	8.59102	8.852456	8.671732	8.570047	8.731405	8.449916	9.248664	9.043306	9.15453
"A_23_P108042"	2.2751284	1.6814456	1.7463608	1.8725817	3.3020144	3.168008	4.7985415	1.7569234	1.6833353	3.1686783
"A_23_P108054"	9.254103	9.594148	9.288758	9.581373	9.484381	9.753285	9.652611	8.533386	8.98163	8.523888
"A_23_P108062"	4.7591457	5.930312	6.283669	5.1220503	4.7204156	5.0586095	3.700455	4.9268847	5.7646184	5.749616
"A_23_P108075"	1.9385601	4.185845	1.7769579	1.9502621	1.7238734	1.8078647	1.8124967	3.4427977	2.3052733	2.5114133
"A_23_P108082"	4.1220427	4.4473305	4.303258	3.6811886	4.200395	5.258251	4.684545	3.9471836	4.2995605	3.8964872
"A_23_P108103"	10.230243	10.0476055	9.913933	9.6161585	9.534531	9.403783	9.00593	10.3383255	10.570423	10.417186
"A_23_P108129"	6.066547	6.0825644	6.1436315	6.148141	6.034821	6.328168	5.7839656	5.9187603	5.978826	6.2597756
"A_23_P108135"	14.775405	15.116469	15.259954	14.922519	15.237521	15.423744	15.450029	15.255577	15.532858	15.340451
"A_23_P108143"	11.877669	12.585746	12.362787	11.811613	12.900734	12.9762745	13.396255	10.946519	12.0031185	11.406286
"A_23_P10815"	12.322578	12.4677925	12.564005	12.564005	12.009384	12.1744	12.003395	12.278869	12.052632	11.938034
"A_23_P108157"	6.0170236	5.680872	5.986856	6.195012	5.560293	5.208587	5.1144094	4.4442196	5.5106225	5.943987
"A_23_P108170"	3.3787196	2.394562	2.2490926	2.6709094	4.9277945	2.6818452	2.1576445	3.364217	3.4241602	3.0876966
"A_23_P108180"	5.793097	4.32821	4.267034	3.5928423	3.3103795	4.2494965	3.0757	3.37339	3.9749165	3.6956074
"A_23_P108200"	8.421113	9.195204	8.878031	8.519698	9.1185055	9.524084	8.834178	7.717029	8.289712	9.50851
"A_23_P108216"	7.6430416	4.607284	6.6010013	4.992014	7.698834	4.742729	5.7435703	8.082177	8.640084	8.466701
"A_23_P108221"	2.6217566	3.4404697	3.3801036	3.261801	3.6982353	3.9322944	3.6123297	2.7790277	3.4912615	2.8897407
"A_23_P108244"	14.254928	14.819324	14.652229	14.431153	14.481037	14.514371	14.72451	13.709081	14.19378	13.716489
"A_23_P108265"	3.971158	4.425001	4.774229	4.361361	2.1814575	3.5118876	2.8743854	4.0573215	4.3181233	4.337177
"A_23_P108280"	6.115627	5.853918	5.9361134	5.7646184	4.0074005	1.497304	3.1222415	3.5307903	4.398585	4.551243
"A_23_P108294"	8.230714	5.817945	6.873953	5.994843	6.4249806	5.721479	6.227898	7.322001	8.590605	8.628773
"A_23_P1083"	9.746327	8.6178055	9.455445	9.371917	9.574206	8.385717	9.10926	9.502501	6.9179106	6.783009
"A_23_P108303"	13.9862385	13.74514	14.230412	13.940664	13.827415	13.887678	14.103687	13.588018	14.129249	14.017357
"A_23_P108314"	4.767011	3.1444216	5.6120973	5.5667176	4.5491533	3.1506763	1.7973418	4.630131	4.22354	4.4464245
"A_23_P108326"	10.04805	9.685675	10.124651	9.81407	10.034695	9.893687	9.420007	9.035217	8.931112	9.320547
"A_23_P108331"	12.981999	13.164658	13.101003	13.084788	13.215746	13.27184	13.337163	13.133924	13.040031	12.955651
"A_23_P108342"	8.314166	8.212402	8.404119	8.316092	7.8554273	8.05864	8.21388	8.042286	8.035528	8.153803
"A_23_P108376"	8.9317665	8.88402	8.928829	9.166125	8.756033	9.019572	8.649299	8.9317665	9.129611	8.892143
"A_23_P10839"	9.610713	10.329554	10.257469	9.673106	9.611522	9.794767	9.171099	10.124912	10.565773	10.062269
"A_23_P108394"	11.545923	11.665085	12.163808	12.329867	12.228552	11.950555	12.032274	11.36138	11.738452	11.556235
"A_23_P108404"	9.646631	9.432486	9.797317	9.794943	9.551376	9.500498	9.806327	9.698364	9.515812	9.914111
"A_23_P108415"	13.057489	13.480442	12.759331	12.824283	12.64797	12.615851	13.032713	13.1569605	13.174922	13.2997465
"A_23_P108427"	3.6181931	2.511933	1.7606089	4.3346176	4.3791447	3.3557615	3.469016	6.4165363	5.9561453	6.6844473
"A_23_P108437"	8.001068	7.286584	7.1594806	7.095479	6.971031	9.070061	8.224268	9.828228	6.8607583	7.2213407
"A_23_P108463"	7.7424335	7.803064	7.5490584	7.5923834	6.8381033	7.1527333	7.615504	7.2974567	7.5630507	7.2928514
"A_23_P108492"	1.6326095	1.6121081	2.486915	1.7327732	1.6665796	1.7135824	1.6658671	2.1526258	1.644731	2.588327
"A_23_P108501"	8.563145	6.363206	6.3058515	6.5621996	9.522208	9.1910715	8.524295	9.308317	8.686094	8.830467
"A_23_P108514"	8.247903	8.557827	9.066958	8.674641	8.359863	8.604972	8.919383	9.282423	9.330046	8.120891
"A_23_P108522"	12.4416895	12.442709	12.365945	12.5341	12.548653	12.57338	12.733276	12.094853	12.018517	12.108871
"A_23_P108534"	6.150237	6.2244005	6.0457616	6.009994	6.2105155	6.2806106	6.0819187	6.163257	6.3846207	6.044697
"A_23_P108546"	1.6401455	1.6222054	3.1797738	1.6627847	1.6239733	1.6466707	1.6344714	1.7063985	1.6397145	1.7003443
"A_23_P108554"	13.8335285	13.70332	13.976242	13.623	13.686313	13.852982	13.863612	13.728442	13.798161	13.655997
"A_23_P108564"	1.5624982	2.1310987	2.4246314	3.0296688	2.1529887	1.7937806	1.8978599	4.7307816	2.0964112	1.5856736
"A_23_P108574"	5.1985283	6.361064	4.9580836	6.3180213	7.6440225	7.8858085	7.8433886	6.99579	5.880115	5.9204636
"A_23_P10858"	8.379025	8.345117	8.630439	8.295174	8.366917	8.9403715	8.98163	8.387228	7.8755083	8.26282
"A_23_P108592"	5.781447	6.311175	5.876934	5.8531084	6.5384126	7.111272	6.9547963	6.1864567	6.4302764	6.2442336
"A_23_P108604"	8.032875	8.255937	8.227819	8.443358	8.88419	8.634993	9.190264	8.316092	8.271919	8.032458
"A_23_P108641"	10.790206	11.068772	10.855349	11.020911	10.511623	10.559828	10.415138	11.284373	11.282225	11.266669
"A_23_P108657"	10.813689	10.450732	10.842268	10.251883	9.688139	9.997052	9.86678	9.759894	9.532521	9.693777
"A_23_P108662"	12.9762745	12.599952	12.773664	12.78808	12.82038	13.077991	13.211383	13.358171	13.382456	13.215746
"A_23_P108673"	4.6068664	4.26916	3.9961276	4.303258	4.6920986	3.5837798	3.3957477	6.0741916	4.8746624	4.631615
"A_23_P108699"	2.5338662	2.969877	2.5065901	2.9989526	3.131017	3.648337	2.3572485	6.1818027	4.388422	5.042801
"A_23_P10870"	9.995864	10.1476345	10.150598	10.085558	9.830206	9.748775	10.12515	9.313431	8.996719	9.521315
"A_23_P108708"	11.889121	12.204845	11.938709	12.193687	11.725068	11.873051	12.005593	11.321141	11.439907	11.411678
"A_23_P10873"	7.570785	8.126189	6.258237	7.927017	8.884985	7.5543814	8.51616	8.400229	7.4210916	6.8883505
"A_23_P108734"	1.6761763	1.6752257	6.270522	1.9312202	1.733019	1.8143365	1.7959952	4.938881	4.6766586	5.440258
"A_23_P108743"	1.5953969	1.5845522	2.0009902	1.644649	1.6162336	1.6475495	1.6062298	1.6499827	1.6067891	1.630276
"A_23_P108751"	10.509347	7.7033935	10.353043	8.487219	12.148741	6.4711437	8.515926	11.090165	11.546817	11.343107
"A_23_P108761"	9.0414095	9.102192	8.87419	9.016835	8.75518	9.1744375	9.421199	8.899607	9.131824	9.0733795
"A_23_P108785"	12.135059	12.435057	12.393778	12.390931	12.085598	11.832566	12.057575	11.907374	11.671226	11.851899
"A_23_P108819"	4.0526094	4.725425	4.1354465	4.1396894	3.9199939	4.5673566	6.1301837	3.8103333	3.4332285	3.49337
"A_23_P108823"	12.257412	12.67402	12.095941	12.219335	12.410124	12.796753	13.130343	10.656807	11.132168	11.013316
"A_23_P108835"	13.116455	13.00657	12.985652	12.981313	13.0706215	12.765183	12.815489	12.582667	12.792261	12.688866
"A_23_P108842"	6.5845222	6.1891623	5.8415246	8.022263	9.070449	6.041501	7.3285594	8.550515	10.02967	10.458923
"A_23_P10885"	5.74253	5.95941	5.92161	5.872049	5.7303367	6.2294855	5.917979	5.853696	5.570054	5.3881006
"A_23_P108871"	8.599731	9.041613	9.19472	8.691673	8.462485	8.440063	8.833403	8.826357	8.629688	8.932509
"A_23_P108883"	6.0495477	8.316912	7.5306077	7.896411	4.567672	8.414694	8.8273535	9.15562	8.8032	8.891592
"A_23_P108911"	2.6560154	1.6434932	1.7254126	1.7965232	2.073401	1.7650056	1.7146868	1.7302847	2.5075302	2.3806007
"A_23_P108922"	7.9667263	7.916091	7.67616	7.9333034	8.005583	8.105783	8.278014	7.748124	8.315394	8.3167
"A_23_P108932"	8.991562	8.667333	8.965026	9.192513	8.570812	8.272172	8.308304	9.142293	9.680899	9.52746
"A_23_P108948"	8.323238	9.223587	8.42363	9.46496	10.536221	10.614514	10.781275	9.739812	9.514001	10.056124
"A_23_P108970"	6.6356354	5.6507425	6.4533544	6.429448	5.822474	6.268126	5.738169	5.5706024	5.521335	5.333099
"A_23_P108990"	4.5596633	4.7144403	4.538592	4.5805626	4.7060432	4.6126966	4.867908	3.8187768	4.576773	3.7854736
"A_23_P108994"	10.64916	10.754636	10.6596985	11.057668	10.690199	10.768036	11.027327	10.38538	10.252184	10.864291
"A_23_P109001"	7.4314065	7.3414326	7.7768216	7.4729977	6.979702	7.4307694	7.50646	6.8460455	6.2110066	6.716807
"A_23_P109017"	9.804043	9.421334	8.768728	9.294709	9.550988	9.43796	9.469846	9.361169	8.217003	9.322088
"A_23_P10902"	11.808605	8.69665	10.688297	12.135059	11.783414	8.292828	10.025475	12.47658	11.226383	10.796497
"A_23_P109026"	10.677888	10.704955	10.325705	10.727075	10.343322	10.637641	10.825048	10.816473	10.839849	10.790499
"A_23_P109034"	12.093994	10.788471	11.221064	10.713979	7.4609604	5.687025	5.829908	8.94768	9.670668	9.823872
"A_23_P109055"	5.753612	6.50807	6.411272	6.329846	5.984482	6.573741	6.0622272	5.8917317	5.5929403	5.919838
"A_23_P109072"	5.8950696	6.111758	7.6822863	9.051092	5.95941	2.8769863	3.3537064	5.06438	4.832547	4.4107847
"A_23_P10911"	7.910096	9.12675	8.079759	8.421519	7.751096	7.899077	7.960025	8.293078	8.000919	7.7313213
"A_23_P109122"	12.715256	11.190687	12.539339	11.933098	9.967188	8.850946	9.162436	11.729018	11.818186	11.557537
"A_23_P109133"	6.313478	6.8224616	6.819019	6.220247	6.24698	6.326709	6.1457	8.147749	7.3459735	6.541641
"A_23_P109143"	13.421299	13.792807	13.43706	13.761595	14.015232	13.301257	13.432391	13.055073	12.307282	12.980134
"A_23_P109171"	6.5398026	5.2068706	6.399518	7.509057	6.5942607	6.5333166	5.355891	7.2175355	6.711402	7.2117486
"A_23_P109184"	11.824936	11.862505	11.465417	11.514287	12.341479	13.97725	13.476902	11.151901	10.746904	11.659375
"A_23_P109193"	5.1722746	6.0464244	5.962414	5.6639853	5.557746	6.649806	6.6083913	5.2757754	5.121777	5.258251
"A_23_P109201"	12.938782	13.007295	12.725245	13.018722	13.293755	13.18605	12.83404	13.930943	14.124222	14.276819
"A_23_P109224"	5.4194317	5.460774	5.345857	5.088753	5.4652863	5.8581715	5.3954377	5.336609	5.8568196	5.735598
"A_23_P109229"	4.29633	4.545024	4.107608	4.2546988	4.1731806	4.7449827	4.547464	4.0783134	5.0808415	3.9983664
"A_23_P109235"	9.670349	10.319699	9.817009	9.910688	10.480914	10.253038	9.771859	9.71319	9.428739	9.561076
"A_23_P109254"	12.132426	11.986605	12.272657	12.116053	12.253242	12.227461	12.17968	12.1076765	11.817499	11.900399
"A_23_P109269"	8.555168	7.0228863	8.33163	7.690314	8.857661	8.63867	8.542061	8.345304	8.25189	8.26464
"A_23_P10927"	6.1815763	6.4494324	6.716536	6.4496484	5.9235654	6.789175	5.811578	5.7796626	4.470129	5.485688
"A_23_P109286"	3.2864554	1.9749548	5.320846	1.7328991	11.03944	9.498115	10.768385	4.13726	2.5542552	3.8775349
"A_23_P109304"	8.02804	7.5993814	8.703732	8.009123	8.048318	6.9355664	6.6305676	9.202976	8.946566	8.303599
"A_23_P109320"	4.88878	5.5973573	5.6315002	5.7464366	3.926585	4.1323843	4.9313707	6.142744	5.1687226	5.316156
"A_23_P109322"	8.9949875	10.051524	9.764618	9.942978	6.82532	8.355845	7.1747217	8.501158	10.855611	10.304645
"A_23_P109333"	12.428813	12.306018	12.516368	12.321592	12.616119	12.64109	12.411727	12.555602	12.736965	12.532536
"A_23_P109345"	13.260142	12.626055	12.905109	12.691548	13.850369	13.490485	13.7634115	13.123384	12.828379	13.038481
"A_23_P10936"	3.9304886	1.5280259	1.5237563	1.5152426	1.5283216	1.5187736	1.5193002	1.5725809	1.5507824	1.5561917
"A_23_P109382"	4.028508	3.9071481	3.8811123	2.8358643	3.5076494	3.589207	3.0917273	3.5311832	4.494716	3.7806907
"A_23_P109393"	7.3414326	7.007779	7.8796706	6.936952	7.1143627	7.741427	7.2253175	7.5848317	7.992149	7.855224
"A_23_P109410"	8.928142	9.110674	9.466341	9.111909	9.01137	9.965802	9.439902	8.980468	8.833403	8.947786
"A_23_P109420"	9.633179	10.3276825	9.967508	9.843459	9.7399435	10.080967	10.608314	10.331407	9.871893	10.2442255
"A_23_P109427"	11.108718	13.432391	11.9993	12.96703	11.751576	11.150662	11.473783	11.456185	11.509745	10.8119
"A_23_P109436"	7.8007545	6.6965556	8.076776	7.1654134	7.261309	7.895654	7.2592816	7.764406	7.1095915	7.283217
"A_23_P109442"	12.085598	11.628972	12.058059	11.641864	10.984615	11.122429	11.235968	11.319514	11.312933	11.159466
"A_23_P109446"	11.065644	10.799351	11.145246	10.742672	10.0413685	10.289825	10.2682705	10.066925	9.902306	9.930926
"A_23_P109452"	5.573307	5.9366336	6.254851	8.749578	6.5978603	5.82447	6.751194	5.8264318	5.3412886	5.3610168
"A_23_P10947"	4.763436	5.219761	5.295377	5.191396	5.427101	5.614578	5.8406267	4.5992312	5.046837	4.535496
"A_23_P109470"	7.956054	8.042286	8.064765	7.7149186	7.977773	8.472311	8.209196	7.5418525	6.7909307	7.3516335
"A_23_P109488"	7.336771	8.389909	7.1844616	6.61756	7.351874	7.6211004	7.343119	7.4537554	7.0278807	7.1378164
"A_23_P109508"	5.72272	5.35438	4.849944	4.5569553	6.314159	5.7281485	6.597494	4.7784185	3.7372606	4.4497013
"A_23_P109547"	9.803652	9.79523	9.905523	9.672545	9.487798	9.658077	9.875956	8.806613	8.567272	9.039138
"A_23_P10956"	5.2944813	3.8500607	5.709759	4.7126813	5.297901	4.6650443	4.1671305	5.648194	6.4689784	6.348549
"A_23_P109593"	9.456137	9.875775	9.410088	9.413271	9.392574	9.647181	9.966118	9.538824	9.559666	9.258616
"A_23_P109606"	9.840369	10.448663	9.976642	10.256472	10.439808	10.266455	10.479932	9.160595	8.789627	8.953519
"A_23_P109614"	1.8111837	1.9615812	1.9217054	2.1164289	1.8568897	2.054175	1.940862	1.9691198	1.7989177	2.005422
"A_23_P109636"	11.77559	9.632938	9.983005	10.563812	11.795534	12.395554	11.524787	12.24281	12.250434	12.310768
"A_23_P109643"	11.484421	11.438715	11.114867	10.979994	11.293914	11.044055	10.851119	10.264406	10.775886	10.53958
"A_23_P109655"	10.861467	11.270876	11.545923	11.279471	11.476449	11.409111	11.589138	11.454747	10.659158	11.284373
"A_23_P10966"	10.136088	10.018901	10.282506	9.624651	9.827769	9.694629	9.950283	9.207565	9.336906	9.979803
"A_23_P109677"	12.812691	12.665524	12.9079485	12.448944	12.818471	12.89127	13.010333	12.586441	12.743914	12.612455
"A_23_P109682"	11.452949	11.638483	11.465042	11.625038	11.650899	11.610269	11.519999	12.198842	11.921499	12.029459
"A_23_P109720"	1.6953748	1.6824777	1.7952211	1.9356791	1.7528691	1.8359611	1.8008324	1.7416375	1.7077595	1.7688221
"A_23_P109733"	9.110465	9.134738	9.16741	9.343584	9.030607	9.555341	9.268035	9.401457	9.035765	9.097237
"A_23_P109768"	12.780546	12.958481	12.772416	12.979112	12.93808	12.950536	13.208761	13.363159	13.226034	13.229647
"A_23_P109774"	10.030196	9.67589	9.81407	9.8832035	10.044977	10.068521	9.921938	10.42616	9.71863	9.969818
"A_23_P109785"	4.217622	5.587879	3.8307047	4.474608	3.019289	2.9369636	5.020174	3.155037	3.0591795	3.5131507
"A_23_P109794"	5.900557	5.83944	5.909465	5.559	5.5402546	6.2873516	6.3822584	5.5969224	6.212701	5.5982995
"A_23_P10980"	9.513276	9.941832	9.792617	9.800033	6.1798263	1.4885031	4.648612	7.285722	5.5354085	6.2285914
"A_23_P109812"	6.302452	6.3120823	5.4629607	4.634213	6.1352973	6.347678	4.256552	4.504071	4.9966345	5.2310224
"A_23_P109821"	13.627786	14.007652	13.867918	13.716489	13.89234	13.74514	13.922472	13.645508	13.724667	13.553843
"A_23_P109843"	3.3071043	2.3515959	2.7720392	3.6368215	4.2540236	3.0706384	3.9239945	2.4690597	4.3349533	1.510753
"A_23_P109864"	7.3800955	7.53827	7.485317	7.802061	7.1715527	7.551229	7.480952	7.8318048	7.66496	7.316331
"A_23_P10987"	9.491479	9.636612	9.609568	9.311924	9.337081	9.494574	9.601624	9.122598	9.256581	9.215694
"A_23_P109877"	10.85885	11.032584	10.940408	10.860703	10.92204	10.7983265	9.907548	10.62451	10.576111	10.567551
"A_23_P109881"	10.773941	10.486969	10.3758135	10.468461	11.133332	10.1581	10.545826	10.511623	11.129686	10.594986
"A_23_P109895"	8.431296	8.036779	8.334626	7.90003	9.227753	8.994558	7.9443393	8.281693	8.438266	8.334839
"A_23_P109907"	15.731724	15.6696	15.851136	15.529499	15.67423	15.338073	15.121157	15.754038	15.722539	15.656584
"A_23_P109913"	6.126476	2.2068517	3.723175	1.9259818	6.7133145	3.2228332	6.2226057	4.443251	4.6958222	4.243581
"A_23_P109928"	11.768743	12.325782	11.95974	12.146019	11.681911	11.84281	11.071007	11.115538	10.9697	11.2909975
"A_23_P109934"	8.680334	8.758465	8.198868	8.832944	8.945527	9.15562	7.917244	8.880482	9.136739	8.6635065
"A_23_P10995"	5.0590997	6.2334266	5.3038855	3.4325202	6.1225157	6.0120897	3.097862	5.459782	5.5229945	5.3971972
"A_23_P109950"	8.448728	8.211876	8.347299	8.306458	7.826404	8.376043	8.320801	8.128821	8.074993	8.036984
"A_23_P109964"	2.2603896	2.3376067	3.6639109	2.8634074	2.6255536	3.3808944	3.604646	3.6116667	2.5698254	3.233789
"A_23_P109974"	8.830778	9.268201	9.860701	8.68002	7.451687	7.2824693	7.7639723	8.434193	8.952246	8.023092
"A_23_P109988"	6.2397375	5.5340543	4.982464	4.796447	7.610133	6.101753	6.463504	5.737695	4.779214	4.754487
"A_23_P110005"	11.815627	11.67864	12.1342	11.764732	10.897809	11.707214	10.437812	11.399308	11.259014	11.377253
"A_23_P110022"	10.536016	8.071926	9.809795	5.8998647	7.594204	6.1847405	6.314322	6.8852534	9.035993	8.873596
"A_23_P110031"	8.633266	8.577761	8.820391	8.4874735	8.181392	8.691852	7.572447	8.500526	8.278994	7.9814835
"A_23_P11005"	16.095331	16.909351	16.409145	16.282953	16.262001	16.345627	16.516804	16.718689	17.13715	16.433071
"A_23_P110052"	11.135266	10.34496	11.218485	11.316378	7.163373	4.151864	4.842742	11.102038	12.885945	12.701198
"A_23_P110062"	9.903542	10.202048	10.198958	9.9048815	10.107042	10.315974	9.967508	9.774884	9.670349	9.646631
"A_23_P110076"	8.167139	8.110133	8.390914	7.862979	7.772768	8.069779	8.163009	8.020367	8.245976	8.088548
"A_23_P110090"	6.5199986	6.5604753	6.468607	6.6283703	6.3272343	7.432483	6.398967	6.3955894	6.844168	6.488555
"A_23_P110108"	6.1779914	6.061847	5.461815	5.9437366	4.9986806	4.0136275	5.1515393	5.141276	5.4736156	5.5383406
"A_23_P110116"	7.9705744	7.6400175	8.033176	7.6126256	7.7493973	7.180486	7.698153	7.1956034	6.8894777	7.0802503
"A_23_P110122"	10.058779	10.07285	9.666243	9.913053	11.700924	11.287855	11.060648	9.599812	8.83967	9.559131
"A_23_P110135"	5.551722	5.894022	5.6537385	5.9622188	4.585659	5.5050716	5.289144	6.095077	7.301278	6.0330195
"A_23_P110151"	8.905789	8.365848	9.348787	8.551284	7.1119146	7.0157905	7.4281425	6.869174	7.4787736	6.824727
"A_23_P110167"	12.067409	11.94084	12.167809	12.216787	12.092773	11.797283	12.173762	12.025297	12.363585	12.078812
"A_23_P11017"	10.175802	10.027178	9.776118	10.637641	9.906848	9.683519	9.929778	10.369557	10.51981	10.795415
"A_23_P110175"	6.2710056	6.1907434	6.0510893	6.766963	5.829908	3.290763	3.5329099	6.3318696	7.0512533	7.0577245
"A_23_P110184"	6.753888	6.9190273	7.432265	7.3241124	6.1217337	6.6113925	6.8173385	6.150744	5.479125	6.7820635
"A_23_P110196"	7.093359	8.415512	6.4361076	7.761526	6.63388	4.5190625	5.205954	8.408032	7.447205	7.704585
"A_23_P1102"	6.418636	7.0815907	6.2911797	6.246519	5.880815	6.5258803	6.787289	8.655914	8.657526	8.782958
"A_23_P110204"	1.5808355	1.5926918	1.6326095	1.7199043	1.5867395	1.6386251	1.653985	1.6110926	1.5748448	1.6131157
"A_23_P110212"	9.817009	10.038359	9.222011	10.234127	10.935314	12.141692	12.270529	10.115971	9.596271	10.059291
"A_23_P110234"	3.9403229	4.0296183	3.937652	3.9203985	3.172861	4.2746277	4.356284	3.3797536	3.9958332	3.2570791
"A_23_P110243"	9.440073	9.230251	9.279116	9.382335	9.490378	9.903704	9.475095	9.328442	9.413728	9.569241
"A_23_P11025"	7.2087398	6.634679	7.3606524	6.432508	10.118944	10.734079	10.583218	9.595532	8.229744	8.656856
"A_23_P110253"	7.422508	4.472646	6.554389	5.4739013	7.2701836	3.1746624	4.6445985	7.627062	6.991967	6.936952
"A_23_P110266"	4.6732492	1.5724202	1.6518427	1.6276265	10.400869	10.141945	10.278686	9.518139	7.4773507	8.674868
"A_23_P110276"	1.6104653	1.617788	1.6637273	1.7356956	1.6139836	1.6720195	1.6692485	1.6591113	1.6084116	1.6589227
"A_23_P110288"	7.1397963	7.8737254	7.8867188	7.7075496	7.179144	6.937513	7.444845	6.10614	6.8849673	6.419621
"A_23_P110299"	1.6215441	4.2553415	3.9803967	3.589207	1.915479	1.7323607	2.8356647	1.8900571	1.6262621	1.673691
"A_23_P110304"	9.810361	10.0730295	9.876417	10.263158	9.48606	8.96408	9.00722	9.875775	10.741191	10.008259
"A_23_P110319"	2.9796188	3.1373136	2.3806007	1.5249805	2.2191186	1.5327754	1.5195223	2.8653736	5.075471	5.391441
"A_23_P11032"	10.5135355	11.157225	9.826189	10.779052	9.78228	9.8289175	10.302329	10.025745	10.232645	10.192146
"A_23_P110345"	7.713228	7.8791084	7.603898	7.4333334	7.7013535	7.977773	8.387678	7.682792	7.57266	7.7258196
"A_23_P110362"	9.217612	9.532521	9.556828	9.366444	9.079491	9.735392	9.564378	9.584223	8.757494	9.457524
"A_23_P110386"	1.8023624	1.748598	1.8738854	2.1619966	1.794026	1.9740992	1.9167422	1.7848091	1.745801	1.8093371
"A_23_P110403"	9.26634	7.702582	8.48817	8.475483	9.265551	7.2084665	7.1130595	11.076762	9.860701	11.581158
"A_23_P110412"	7.6854887	8.698157	5.877521	8.358421	6.2995114	7.74662	6.861726	9.103736	9.159875	8.752611
"A_23_P110430"	10.667039	11.659794	11.293914	10.395553	9.275865	8.764457	8.399417	9.633652	11.134229	11.629681
"A_23_P110433"	10.572447	10.309183	10.585942	10.435554	10.719049	10.760384	10.69777	10.510332	10.203527	10.5022545
"A_23_P110445"	11.544424	11.496142	11.421118	11.108718	11.196603	11.542215	11.630367	11.298932	11.212828	10.975436
"A_23_P110462"	2.381565	2.9680076	1.9839131	3.437747	4.1263437	5.0667973	4.6920986	3.331071	4.2098246	3.7441354
"A_23_P110473"	11.442161	10.473419	10.03277	10.0413685	11.297222	11.096264	9.988102	10.400687	8.958793	8.405678
"A_23_P110492"	11.984097	12.468881	12.167422	12.163371	12.040984	12.542948	12.074625	11.990074	11.9989605	12.083085
"A_23_P110504"	11.224416	11.2530775	11.392612	11.327763	11.11302	11.246197	11.566989	11.387418	11.096853	11.272665
"A_23_P11051"	6.8006783	7.0863223	6.9240503	7.963046	6.841033	7.081155	6.9603987	6.1744018	5.7990456	5.9354916
"A_23_P110531"	4.650234	1.5411726	2.3512375	4.0848217	7.87349	7.8000336	8.748222	6.232827	6.3939333	8.785088
"A_23_P110557"	6.8408775	5.0502543	5.3686438	4.411977	7.4310813	9.210946	8.224885	5.4875216	6.204966	6.7063794
"A_23_P110569"	8.503134	11.317968	10.980363	9.928891	12.061466	11.157514	11.93348	10.665422	10.850164	10.526167
"A_23_P110571"	9.681556	9.617874	10.342343	10.025475	11.29687	11.701422	11.090165	10.023401	10.510332	10.2755
"A_23_P110585"	9.296836	9.685114	9.468721	9.447603	9.03554	9.082526	9.325525	8.7110195	9.964119	8.736697
"A_23_P110598"	8.885781	8.378824	8.654103	8.448482	8.341799	8.519698	8.845259	8.74764	9.039671	8.843629
"A_23_P110606"	7.8459516	7.8568287	7.6318417	7.7295275	7.808908	7.736464	7.5970902	7.6437917	7.059242	7.274556
"A_23_P110611"	9.0367985	8.662828	8.99134	8.95753	8.768728	8.976082	9.2613	8.99134	9.212269	9.115224
"A_23_P110624"	7.959292	10.888765	11.232904	8.48982	11.4803	11.812269	12.449693	12.246461	11.555351	11.412673
"A_23_P110643"	8.469679	8.363598	8.883341	8.587275	8.29976	8.63344	8.903157	8.948364	8.735246	8.609305
"A_23_P110655"	11.184257	11.206043	11.196122	11.182331	11.24599	10.8033905	10.727764	11.563628	11.766449	11.605428
"A_23_P110661"	11.996254	11.899075	12.083085	11.965022	12.01612	12.084402	12.041788	12.13597	11.889121	11.9828615
"A_23_P110686"	3.8764145	3.9542196	4.6638317	4.9515038	4.841397	2.7600322	3.7535357	4.890168	3.1984484	3.634202
"A_23_P110699"	5.983921	3.8335657	5.3003426	4.484216	7.373158	7.8918114	6.9673057	5.5106225	5.2568784	5.79183
"A_23_P11070"	1.7787623	1.7850503	1.9615812	2.2991028	1.904944	2.1377418	2.0321274	1.8978599	1.8093371	1.9623249
"A_23_P110704"	11.125307	10.694597	10.722415	10.66954	10.59887	10.90356	11.1496315	10.613897	10.616507	10.598568
"A_23_P11071"	11.564099	12.1727	11.554426	12.0088415	11.170095	11.178082	11.175046	11.061283	11.160076	10.986749
"A_23_P110712"	10.392031	11.01815	10.083817	10.236131	12.638434	10.6588955	13.259173	13.541231	13.482906	13.153378
"A_23_P110725"	6.9712467	6.6854606	7.0639257	6.6846356	7.1763754	7.2845216	8.244571	6.9712467	6.9136553	6.95756
"A_23_P110764"	2.7780266	2.6167004	2.5385273	2.9897788	5.0181365	7.416241	7.6412635	5.612791	3.1201756	4.353509
"A_23_P110777"	2.3714254	1.9273332	2.4040258	2.274266	2.158705	2.1190224	1.9995773	1.9175289	2.3681684	1.9717178
"A_23_P110787"	8.459415	8.796986	9.153584	8.494138	8.555861	8.723652	9.127285	8.3264265	8.816475	8.865042
"A_23_P110791"	13.192795	12.690402	12.30837	11.372464	14.094526	12.977236	12.369524	12.985652	12.52746	12.195497
"A_23_P110802"	6.5984826	7.7578526	7.016236	6.352082	6.5285	7.1079803	7.648646	5.775643	5.228771	5.676644
"A_23_P11081"	1.4899725	3.67014	1.4905621	5.1619267	4.84296	1.4922172	1.4888536	1.4970506	1.4903194	1.4988029
"A_23_P110811"	15.588872	15.722539	15.957432	15.739101	15.635316	15.43796	15.722539	15.774079	15.951931	15.810615
"A_23_P110837"	3.462418	2.2610865	2.307441	1.827773	3.6821382	3.638254	2.2294235	4.3098307	5.414011	3.465475
"A_23_P110846"	9.53364	9.967957	9.780889	9.624357	9.403783	9.471467	9.250112	8.904232	7.958376	8.690198
"A_23_P110851"	4.9762087	5.070033	5.4652863	5.112279	4.8365536	5.1791973	4.850371	4.7936087	5.1807003	5.125343
"A_23_P110879"	8.773216	8.769964	8.673077	8.485942	8.124732	8.065224	8.731405	8.79912	8.407299	8.892836
"A_23_P110882"	12.906604	12.545314	13.126734	12.765183	12.686419	13.023957	12.561022	12.836903	12.888418	12.842846
"A_23_P110896"	9.163085	9.406641	9.446655	9.05437	8.85121	9.304197	9.212269	10.146463	9.45499	9.78724
"A_23_P110903"	7.6472874	7.813391	7.974395	7.7657323	7.039151	7.7799306	7.620182	7.6953783	7.826225	7.691448
"A_23_P110941"	12.4244795	12.544563	12.400993	12.572792	12.593061	12.518421	12.539339	12.687404	12.288949	12.504403
"A_23_P110957"	7.043876	4.756649	7.271039	6.392848	5.4605303	4.1989837	3.4192812	7.9784913	6.8824654	6.7337
"A_23_P110961"	11.812669	12.0876045	11.196603	11.861069	11.567836	10.896518	11.234282	12.417175	12.209568	12.538309
"A_23_P111000"	10.695109	8.396593	9.763859	8.612005	10.34496	8.114522	9.763936	10.227763	9.414322	9.617874
"A_23_P111005"	13.105536	13.588018	13.1080675	13.4945135	13.567547	13.787533	13.89524	12.759982	12.65779	12.792261
"A_23_P111020"	5.850982	6.010874	5.813734	5.9381704	5.504392	5.878932	5.925598	5.417907	5.5180783	5.6383214
"A_23_P11103"	3.8873918	4.452696	3.7748647	4.154207	3.6564806	4.190994	3.4055815	3.3518996	3.7629545	3.0228705
"A_23_P111037"	12.526713	12.393223	12.461646	12.550845	12.40909	12.343566	12.465696	12.290762	12.835919	12.815489
"A_23_P111041"	10.8857155	10.949876	11.114314	11.209229	11.2890215	10.616981	11.0227785	10.06419	10.194563	10.312283
"A_23_P111054"	9.493067	9.977777	9.641321	10.264278	10.252805	9.704401	9.998368	8.992043	9.268201	9.094356
"A_23_P111088"	4.219793	4.9104977	4.3102517	4.639427	4.281802	4.582845	4.48341	4.0653787	5.282768	4.496929
"A_23_P111092"	10.9858265	11.02546	10.292381	10.519472	10.356477	10.680383	10.783419	10.565223	10.62817	10.51414
"A_23_P111112"	11.967517	12.228552	11.974222	12.370188	12.371811	12.659561	13.082165	12.40909	12.451786	12.545314
"A_23_P111126"	11.110465	8.131871	8.447347	9.798883	8.881315	8.551429	8.696791	7.967557	8.339943	8.369424
"A_23_P111132"	11.735346	11.512931	10.460577	11.256857	12.7016735	11.503526	11.290485	13.542927	13.635447	13.462674
"A_23_P111141"	12.268663	12.463021	12.286409	12.512099	12.334608	12.355771	12.579373	12.115125	12.107348	11.855371
"A_23_P111155"	4.0102525	4.0269704	3.9036307	3.9892764	3.8879309	3.6205418	4.0848217	3.2928953	3.3111682	3.6547399
"A_23_P111171"	11.099805	11.596418	10.9603405	11.074867	10.022293	10.1213255	11.304432	10.785592	11.135384	11.082621
"A_23_P111188"	7.5554986	7.722038	7.6506042	7.6338	7.57369	7.798395	7.7060385	6.26772	6.008982	6.2043843
"A_23_P11119"	2.1431892	2.994847	2.733376	3.324577	2.1381705	1.529242	2.8207388	1.940862	1.7233427	2.5892577
"A_23_P111194"	6.277566	6.353298	6.200888	5.8153663	5.656765	6.045142	5.9241023	5.8859787	6.245683	5.8908606
"A_23_P111206"	10.574961	11.170095	9.879905	9.50229	10.96891	12.987533	12.618731	10.054574	11.275929	11.091309
"A_23_P111228"	7.9519606	8.3783455	8.1555195	8.438077	7.983175	8.553633	8.098103	7.779525	7.5315	7.6099043
"A_23_P111240"	6.5855904	5.819175	6.032614	8.480935	7.0373697	6.486542	7.4866805	8.108139	7.8351817	7.707069
"A_23_P111260"	6.2317863	4.3503838	6.164995	8.223508	7.589336	4.68211	6.067055	7.2534237	7.290355	7.5630507
"A_23_P111267"	7.979514	8.814197	8.821024	8.353421	9.94706	10.499786	10.337712	9.181591	9.194107	9.254542
"A_23_P111273"	9.111654	10.064693	9.689797	9.519411	10.263158	10.758505	10.802807	9.159875	9.399376	9.508934
"A_23_P111288"	13.308226	12.964035	13.513394	13.062557	13.228457	13.188617	13.185209	13.079154	13.100201	13.072297
"A_23_P111297"	7.499345	7.7401915	7.381467	8.013163	7.713571	7.691577	7.522231	8.556508	8.265252	8.488635
"A_23_P111303"	9.681955	9.396076	9.634041	9.601624	9.446221	9.489194	9.667441	9.330555	9.491479	9.232261
"A_23_P111306"	8.756033	8.52674	8.705669	8.587634	8.528924	8.64049	8.80869	8.195498	7.9985247	8.168022
"A_23_P111311"	6.0646996	7.469677	7.876994	7.101964	6.4193993	5.656765	4.8886395	7.7654257	8.315862	8.101879
"A_23_P111321"	2.9505484	3.201833	1.8654404	1.9935348	1.8077056	3.954552	5.131151	2.355369	1.7678698	1.8956828
"A_23_P111343"	11.997288	12.466488	12.453927	12.146874	12.078091	12.2109785	11.9345255	12.041788	13.011359	12.20818
"A_23_P111360"	6.4335084	6.9333134	6.799975	6.3972135	6.5947556	7.0747204	7.2024713	5.9212637	5.9462686	6.1867795
"A_23_P111361"	7.530931	7.121714	7.036693	6.9258456	6.4451737	6.8451853	6.94011	6.4070272	6.852816	6.990327
"A_23_P111373"	9.615449	9.592585	9.863705	9.517733	9.592779	9.706856	9.864424	9.296331	9.228968	9.289649
"A_23_P111381"	9.404855	9.326122	9.579085	9.327402	8.901452	8.98444	9.245278	9.376404	9.127122	9.330833
"A_23_P111395"	4.535138	4.1846075	4.4739275	4.310917	4.355323	4.5998926	4.555823	4.0943494	4.691069	4.23005
"A_23_P111402"	4.776534	1.7140889	3.8879309	5.303318	5.73331	1.8657801	5.756137	6.944466	8.501515	8.631452
"A_23_P111413"	7.2125683	8.205584	7.544364	7.2989645	7.299096	7.5262384	6.5685935	7.3399897	8.147562	7.21208
"A_23_P11144"	7.469816	8.608165	8.023332	8.265939	7.592166	8.339943	8.590605	7.9602838	8.302955	8.4213295
"A_23_P111452"	12.661491	12.433989	12.553185	12.722585	12.778663	12.310277	11.935411	12.995084	12.978283	12.841282
"A_23_P111480"	6.627241	7.2128086	7.104257	6.9136553	7.1807895	7.6372333	7.506768	6.364615	6.2873516	6.355894
"A_23_P111481"	12.377627	12.438708	12.356472	12.47105	12.693575	12.643541	12.309365	12.515652	12.575871	12.517345
"A_23_P111487"	8.285631	8.516582	8.443857	8.519891	8.610844	8.661607	8.392197	8.227819	8.232242	8.36474
"A_23_P111492"	8.785499	9.198249	8.840811	8.755704	8.335126	8.484892	8.300162	7.9018354	7.934575	7.7704616
"A_23_P111506"	16.711187	16.858429	16.836046	16.680809	16.858429	16.74066	16.985126	16.762726	16.900856	16.836046
"A_23_P111517"	4.8444157	9.05354	4.9765024	9.230789	8.286778	7.615741	7.530039	9.134217	8.802447	9.082845
"A_23_P111525"	8.681601	8.770735	7.94144	8.259213	8.565965	8.709519	8.365848	9.8656645	9.86322	10.0751915
"A_23_P111531"	6.1406465	3.8811123	4.567151	4.606409	7.101048	4.4018803	5.2389235	7.745724	6.744311	7.1402807
"A_23_P111571"	16.441055	16.680809	16.413492	16.316025	16.487091	16.370998	16.724874	16.516804	16.711187	16.900856
"A_23_P111583"	7.338561	6.5314436	7.1730757	6.797066	7.2039165	6.3762665	8.279784	5.4988194	5.547721	6.0316916
"A_23_P111593"	6.8511047	6.8999944	6.1896167	6.513005	7.3292828	8.28259	8.170394	6.902319	7.0198646	6.8702784
"A_23_P11160"	7.713059	8.997889	8.252271	8.624667	6.9260497	6.8958125	6.725506	8.808945	7.3096166	7.553666
"A_23_P111604"	2.4652216	9.763936	1.8106833	10.437981	1.7707406	2.7179465	2.1063771	5.5959496	8.391173	8.529095
"A_23_P111621"	12.306579	12.162657	12.425727	12.485845	12.205286	12.515652	12.902666	11.769689	11.913897	11.810885
"A_23_P111635"	7.9702234	8.112423	8.21892	8.077749	8.130913	8.72608	8.135767	8.221773	7.6880913	8.346958
"A_23_P111657"	5.150417	5.412857	5.2781363	4.624859	5.0624857	4.927206	4.510365	4.6885686	5.1512203	4.7937746
"A_23_P111662"	2.0252645	3.243334	3.338756	1.9336203	1.7169582	1.8167624	1.8083243	2.9969673	1.7009149	1.9342126
"A_23_P111672"	5.928583	3.9372149	4.883049	4.539967	6.1259933	5.25129	7.05289	6.0668116	5.5445037	6.7234344
"A_23_P111698"	5.393355	5.5667176	5.631873	5.649646	5.419164	5.90621	5.7036023	5.3639135	6.5107584	5.8861437
"A_23_P1117"	7.468502	7.9335527	7.747575	7.4797854	7.29997	7.628798	6.447328	6.8857036	7.067531	6.2099695
"A_23_P111701"	11.585333	9.520766	10.97156	10.64812	11.509237	9.375498	10.532845	11.924501	12.045084	11.763179
"A_23_P111712"	7.934036	7.8918114	8.286778	8.108466	8.052772	8.3958435	8.167514	7.890714	7.400186	7.645871
"A_23_P111724"	5.5894275	7.14151	5.564631	8.632515	6.616632	2.0947142	3.0156288	7.5686913	6.151793	6.914918
"A_23_P111737"	8.347786	7.055155	8.40182	6.3120823	8.103564	5.6427507	6.7824674	8.64169	7.7273726	8.246569
"A_23_P111745"	10.071406	11.787051	11.22769	11.512581	11.493869	11.5776	10.960727	11.168709	11.512581	11.125762
"A_23_P111753"	12.631684	12.704542	12.728164	12.892466	12.738719	12.668398	12.613705	12.964035	12.824283	12.868774
"A_23_P111766"	5.5810223	5.66355	6.1692944	6.0584435	5.5959496	5.4282317	5.4963703	4.983973	5.596355	4.99342
"A_23_P111797"	11.328073	11.523351	10.970273	10.6171875	11.221488	10.955172	11.281046	11.361842	11.287235	11.376226
"A_23_P111804"	9.879368	9.642166	9.220395	9.272891	9.230486	8.808281	8.800955	9.621037	9.581615	9.229895
"A_23_P111811"	11.169354	10.23705	10.671165	10.498928	10.651511	10.669228	10.638642	11.0842705	10.868154	10.904208
"A_23_P111826"	1.650292	2.5723515	2.241077	1.8306715	2.656707	1.7550297	1.7345138	1.6847273	2.51671	2.3722632
"A_23_P111835"	12.165615	12.107348	12.220124	11.921499	12.242228	12.516368	12.65564	11.670793	11.132519	11.696947
"A_23_P111843"	13.241843	13.458948	13.353038	13.438866	13.441751	13.482906	13.645508	13.457862	13.814145	13.464609
"A_23_P111860"	10.269488	9.354991	9.053908	9.658759	7.7103496	5.6110334	6.331241	10.292902	10.817803	10.25531
"A_23_P111865"	6.3356433	6.2266273	6.4376707	6.2263775	6.8463926	7.0621862	6.9985123	6.624117	6.634837	6.438846
"A_23_P111888"	7.926858	6.931752	6.677458	6.861726	7.2645273	3.90944	5.659498	7.684943	7.409906	7.4711323
"A_23_P111919"	5.47227	3.1693769	9.48991	8.597881	8.665036	6.265404	9.222472	8.46915	9.370335	8.631851
"A_23_P11192"	14.036624	13.562686	13.760448	13.9837885	13.854356	14.132024	14.749044	13.003518	12.749123	13.052174
"A_23_P111929"	5.1515393	4.885695	5.1881647	5.099788	5.01087	5.8677797	5.3183823	5.3352447	5.714797	5.2790275
"A_23_P111947"	1.7032759	1.6677482	1.7488856	1.7663618	1.7200756	1.791664	1.7192328	1.782266	1.7032759	1.7854013
"A_23_P111961"	9.913701	10.161097	9.92312	9.864898	9.882461	9.81247	9.771342	10.032419	9.578724	10.106289
"A_23_P111978"	5.765485	4.858626	5.026475	3.582066	3.7545996	5.0317345	2.5784218	4.102907	4.440937	4.324712
"A_23_P111981"	10.056124	10.083589	9.9737835	9.831326	9.407112	10.246904	10.545436	9.954522	9.767811	9.810361
"A_23_P111995"	8.017163	6.782222	7.8079705	9.161544	8.736496	7.880274	7.204145	7.1912045	6.319588	6.244713
"A_23_P112004"	7.9876556	6.8564706	7.4316244	7.9565163	6.833782	6.8212304	6.54186	8.481822	8.466701	8.247903
"A_23_P11201"	8.752859	8.158865	7.595943	6.328407	9.089976	9.143584	7.8170357	6.835539	5.2793355	6.2970314
"A_23_P112016"	4.6905494	4.1432357	4.631356	4.871519	4.6812043	4.3926067	4.6096296	6.42658	4.148325	4.154207
"A_23_P112026"	5.69575	5.753847	5.2174807	5.116704	6.876788	5.174222	6.2410207	5.1934013	5.712354	4.7961006
"A_23_P112061"	12.084402	12.267179	12.178314	12.396115	12.231625	12.166488	12.340245	12.189441	11.854244	11.590234
"A_23_P112078"	5.0029573	4.629814	4.9629483	5.095476	4.3400497	4.819396	5.103	4.1390147	4.2791033	4.1955857
"A_23_P112086"	1.8711283	2.0583742	3.0141137	2.4725194	2.7697282	3.2954245	2.9648488	2.2379339	2.0803866	2.2104206
"A_23_P112100"	6.2280817	7.5119395	6.793886	8.080939	6.514579	5.753847	6.9814787	6.1647315	6.354058	5.6101284
"A_23_P112103"	7.8601804	5.3977866	6.8458757	5.207673	7.7295275	5.418502	6.5024037	7.789883	8.043321	8.146619
"A_23_P112113"	11.196122	11.640258	11.510186	11.553099	11.350428	11.588143	11.812269	11.298049	10.705557	11.070552
"A_23_P112135"	12.145366	12.032274	12.036167	12.329309	12.159501	11.921952	11.907791	13.00657	12.40909	12.863341
"A_23_P11214"	9.75846	10.801443	10.30317	10.98194	9.681299	9.554683	9.591979	10.001582	10.171125	10.152781
"A_23_P112159"	8.901452	9.426409	9.388906	9.402989	9.50229	9.738157	9.7531395	9.716568	9.633652	9.465696
"A_23_P112162"	10.68389	10.396433	10.589439	10.272275	10.692376	10.639465	10.571111	9.870149	10.040113	10.04805
"A_23_P112173"	5.9708843	6.7541156	5.6806126	6.3336477	5.781054	6.697277	7.4649687	3.344476	4.3116026	5.0149555
"A_23_P112187"	5.1065307	5.685949	5.0864964	5.588316	5.092986	5.9782534	5.8622947	4.548671	4.5116563	4.2942924
"A_23_P112201"	9.832777	9.85667	9.832482	9.973245	10.407761	10.381693	10.333011	10.39376	10.054153	10.032259
"A_23_P112220"	2.1008654	2.1288269	1.5378636	1.5414197	1.5264964	1.8083243	1.5399364	1.5875115	1.5618591	1.5609553
"A_23_P11224"	12.057046	12.68552	11.849592	12.712829	11.637847	11.923561	11.848328	12.219335	11.664173	12.043907
"A_23_P112241"	9.780146	10.477718	10.582425	10.529638	10.816994	11.173777	10.706524	11.231995	11.561309	11.386318
"A_23_P112251"	13.51131	13.605576	13.848029	13.93721	13.382456	13.335796	13.189174	13.334912	13.407249	13.750172
"A_23_P112260"	11.039219	11.492572	11.462159	11.550658	11.122429	10.944006	10.799746	10.967895	11.548414	11.555351
"A_23_P112275"	3.984176	8.374633	5.43277	8.903736	4.1993704	4.0869975	3.3777642	4.2754374	4.0811024	3.544644
"A_23_P112289"	9.073197	8.304119	9.11513	8.565666	9.067841	10.894884	10.069896	8.726909	9.268446	9.573875
"A_23_P112296"	5.2510886	3.9883235	4.351689	3.9672601	3.2182553	4.1584835	3.6877017	4.185845	4.988204	5.1207285
"A_23_P112311"	8.740303	9.024723	8.72973	8.730752	8.187403	8.754966	8.556508	8.440954	7.464678	8.005201
"A_23_P112327"	1.7440578	1.7896093	1.9585376	2.2812495	1.8265738	2.1028905	2.0161932	2.1036384	4.4087486	4.587562
"A_23_P112341"	10.716078	9.947475	10.491202	10.377906	9.6389265	10.41985	10.6453495	9.715937	10.02453	9.884743
"A_23_P11237"	7.7862577	9.072881	7.8483195	8.491663	7.556152	7.975114	8.004263	7.4843216	7.8657846	7.7736073
"A_23_P112397"	11.189247	11.288566	11.171302	10.929309	11.078222	11.724736	11.238724	10.866221	10.957455	10.922625
"A_23_P112406"	11.760567	11.890658	11.752596	11.651254	11.94084	12.255014	12.066931	11.676791	11.59223	11.510759
"A_23_P112412"	11.121362	10.82097	10.998902	10.853088	10.64111	10.467494	10.386858	10.948768	10.687146	10.758918
"A_23_P112429"	16.19172	16.29327	16.427391	16.19172	15.966525	16.05301	15.663552	16.135014	16.135014	16.033037
"A_23_P11244"	11.24785	12.8463955	11.537768	12.6664505	11.050541	11.372464	10.470488	11.514593	11.360396	11.469591
"A_23_P112452"	10.437057	8.463427	9.051555	9.032195	10.389779	9.694054	8.820618	9.513276	8.8484535	8.700202
"A_23_P112470"	6.869174	6.1761074	7.285722	5.942835	7.309177	6.24698	6.7845387	6.001027	6.1006413	5.837784
"A_23_P112478"	10.642712	11.207563	11.223016	11.088879	10.887452	11.047035	11.132519	10.878598	10.2755	11.063034
"A_23_P112481"	6.804329	6.15667	6.6123023	5.7937183	7.8344407	4.2426176	5.777744	6.577565	6.645463	6.2429056
"A_23_P112482"	5.1988378	4.7478538	5.1181755	4.2909164	6.6846356	3.2418172	4.159372	4.9206767	5.236723	4.4651313
"A_23_P112512"	6.4379115	6.5228863	6.9120536	7.018747	6.4835906	6.7324004	6.932081	7.4791284	7.3740206	7.499345
"A_23_P112531"	13.867918	13.728442	13.995992	14.134309	14.834742	14.81775	14.8486185	14.475688	14.316267	14.296022
"A_23_P112548"	7.3855495	7.8408656	7.3374996	6.82581	6.6561847	7.198021	6.6854606	6.472298	6.0151095	6.194389
"A_23_P112554"	9.365845	6.2221575	7.6733055	8.201417	10.447115	5.330617	8.202844	8.804162	7.9018354	7.132335
"A_23_P11256"	5.977906	6.7774553	6.3186603	8.3097725	4.123478	4.4588575	1.546591	5.8908606	5.0114913	4.753257
"A_23_P112564"	8.326695	9.665928	8.915245	8.622112	5.287127	5.791096	1.5596541	8.68343	9.95676	9.236185
"A_23_P112596"	9.086473	9.974303	9.385791	10.057985	9.446931	10.296833	10.73727	9.978889	9.949974	9.936016
"A_23_P1126"	13.355781	13.183221	12.964035	12.857278	13.168082	12.864685	12.873329	13.037587	13.264583	13.117799
"A_23_P112602"	8.938101	9.411382	9.057739	9.64003	10.569658	11.499949	10.891326	8.8935795	8.758698	8.724907
"A_23_P112613"	10.262564	10.274883	10.507098	10.039838	10.21359	10.314635	10.06644	9.8895445	10.07787	10.180164
"A_23_P11262"	13.044664	14.409856	12.093994	14.393365	13.160128	12.915205	13.654864	12.979112	12.646231	12.741673
"A_23_P112634"	10.390296	10.589439	11.108718	11.151646	10.757167	10.914786	10.747771	12.367767	12.032274	12.216787
"A_23_P112646"	1.6489445	2.7013109	1.7106915	1.7258289	1.6967297	1.7538314	1.6494762	1.7065866	1.6492875	2.7216551
"A_23_P112652"	10.730386	10.151565	10.664908	10.263362	10.336603	10.737492	10.440411	10.977904	11.121663	10.704328
"A_23_P112666"	6.120832	6.203673	6.2949085	6.333412	6.290435	6.122996	6.4158754	6.1454306	6.2782607	6.018926
"A_23_P112673"	6.9131155	8.269617	7.37368	7.241075	7.7842617	8.07561	7.5630507	7.6673255	7.825422	7.790996
"A_23_P112698"	6.3570795	8.037879	7.9001513	7.9481497	3.8772745	5.5418434	5.521567	6.1041293	7.0431414	6.3403015
"A_23_P112726"	9.277344	8.732897	9.64003	7.821188	8.319516	8.595949	8.384591	7.6971917	7.423903	7.219843
"A_23_P112774"	10.09531	8.342784	10.036913	9.027019	8.8032	7.0587726	8.338018	9.752788	11.017137	10.491418
"A_23_P11279"	8.719144	10.376614	9.018386	10.645986	8.973599	8.887211	9.246637	9.842002	9.760274	9.580956
"A_23_P112798"	12.042041	11.7147	12.087226	10.860416	12.903402	13.44406	13.206629	11.530348	11.564099	11.57196
"A_23_P112801"	13.037587	13.244917	13.145942	13.353038	12.902666	13.275579	13.249772	13.185209	13.455695	13.369837
"A_23_P112820"	5.4282317	5.163769	5.0333757	5.049281	4.9057937	5.5876455	5.2158422	5.171236	5.139984	4.9179068
"A_23_P112825"	12.069931	12.166903	12.163371	11.994476	11.815077	12.018986	12.167422	11.850104	11.861919	11.853421
"A_23_P112846"	5.4308634	5.628299	5.8876925	5.826729	5.521335	5.3642397	5.008459	5.845625	5.486271	6.0406923
"A_23_P112859"	5.7176747	5.4420824	2.9342647	3.247897	4.524991	3.708675	3.6020906	3.4636693	3.4775827	3.5434208
"A_23_P11286"	10.82803	11.748638	11.121663	11.942683	10.783108	11.136007	11.091654	10.97309	10.853721	11.089193
"A_23_P112874"	10.241633	10.421646	2.0237012	9.743389	11.280169	11.667539	12.360544	9.024497	8.48209	9.929078
"A_23_P112883"	11.107171	10.641409	10.669833	10.38935	11.068772	11.295983	11.045931	11.620439	11.103402	11.152199
"A_23_P112916"	4.763273	4.9796886	3.937048	4.145185	4.145185	4.7440524	4.1196246	3.8818102	4.543804	4.0379806
"A_23_P112921"	4.853217	2.301867	4.550311	3.110974	3.6236198	5.349988	5.106033	2.9582725	2.4395814	3.3103795
"A_23_P11295"	10.925986	12.630995	11.158169	12.436394	10.838904	11.024074	11.285685	11.267745	11.522263	11.26144
"A_23_P112950"	10.515501	10.650829	10.156315	10.655519	10.725955	10.619304	11.233192	10.365429	10.609963	10.404467
"A_23_P112957"	5.878932	5.2376266	4.980648	5.012396	8.560878	5.4087634	4.9193945	4.6306543	4.5776844	4.173798
"A_23_P112982"	13.068685	13.194281	13.517493	14.170105	11.819009	11.617798	11.59223	12.059645	12.136366	12.294323
"A_23_P113005"	8.281693	7.0929685	7.6515245	8.009256	8.016429	7.22102	7.14151	8.841478	8.676515	8.750908
"A_23_P113019"	3.2306852	3.1601565	3.482031	7.2302694	8.542061	9.083167	8.257609	6.099164	5.7036023	6.25424
"A_23_P113026"	8.643029	9.1923485	9.088012	9.265981	8.754776	9.1929245	9.117769	8.821345	8.810883	8.748033
"A_23_P113034"	6.6609592	5.2648335	7.0778856	6.7991743	7.1603365	7.539862	8.532236	8.398449	8.0615425	7.8355803
"A_23_P113056"	5.5739903	2.7818573	3.7728174	4.268442	9.012669	4.5569553	5.93243	5.1397753	2.854758	3.3147085
"A_23_P11309"	6.3666945	7.642346	6.187007	6.7591677	7.5752363	8.37248	7.6669955	6.7793493	6.1195016	6.179361
"A_23_P113101"	3.6423771	3.4359417	3.641191	3.3043919	3.2966642	3.7356205	3.645155	2.1701863	3.5321608	2.9459062
"A_23_P113111"	10.594986	11.362334	10.644997	10.332103	12.484473	13.166782	12.875028	9.002829	9.573549	9.983005
"A_23_P113161"	9.588342	8.139609	8.72333	8.893378	8.900001	9.264276	8.606311	9.165437	8.812865	8.468958
"A_23_P113184"	12.702968	12.785918	12.760706	12.701198	12.577185	12.677394	12.483887	12.620531	12.553185	12.487022
"A_23_P113204"	12.887032	12.754233	12.617297	12.425026	12.373101	12.453398	12.529982	12.739805	12.602816	12.335832
"A_23_P113212"	6.4491744	7.1261444	6.4926453	7.716521	6.7611227	2.5821717	2.7254019	10.8542595	10.306051	10.2849865
"A_23_P113237"	4.731177	5.8045897	5.3575525	5.3977866	4.806767	5.3749866	5.138675	5.337366	6.2604575	5.3295584
"A_23_P113245"	10.359293	10.126423	10.247606	10.527136	10.524958	10.264853	10.217879	10.696923	10.565486	10.493241
"A_23_P113258"	4.6377144	4.145185	4.4359818	4.8079557	4.205854	4.9588766	5.0366545	3.8051093	4.9612255	4.709187
"A_23_P113263"	7.9980927	8.480935	8.203416	8.116075	7.626379	7.7441874	7.871289	8.334438	9.074232	8.2851925
"A_23_P113283"	7.696031	8.26464	8.325551	7.6967854	7.5490584	7.934036	8.16336	8.079371	7.2149053	7.9969463
"A_23_P11331"	12.31513	12.20108	12.667053	13.0233	12.412585	12.479218	12.148741	12.867917	12.919641	12.777944
"A_23_P113311"	14.907536	15.429815	15.274433	15.259954	15.728631	15.638648	15.01484	14.707414	15.200042	15.065354
"A_23_P113317"	12.218488	12.822494	12.59557	12.526256	13.049487	12.806304	12.110311	12.003807	12.271902	12.322229
"A_23_P113328"	6.1907434	6.2094355	6.0226636	5.838462	5.476181	5.912679	5.9910164	6.190045	6.6202464	6.5153623
"A_23_P113351"	14.95071	12.881489	14.225612	15.039381	12.863061	10.452398	10.868402	14.581666	14.507596	14.631501
"A_23_P113367"	5.68401	5.929505	6.277404	6.452541	6.1457	6.844504	6.926329	5.963834	6.3882103	6.26029
"A_23_P113380"	7.9453135	8.272719	8.23781	8.625117	8.085691	8.41033	8.1848345	7.811859	8.060255	7.561436
"A_23_P113382"	6.976915	8.028638	7.4207535	7.198021	7.37368	7.7149186	7.673162	6.600557	7.0339236	6.5502987
"A_23_P113393"	10.03348	9.810361	9.423272	8.13705	8.936439	9.110242	10.110771	9.18398	9.605956	9.362485
"A_23_P113405"	10.63904	10.333011	10.38538	9.998368	10.078618	10.39116	10.279812	10.349551	10.261468	10.284624
"A_23_P11341"	10.571111	11.212331	11.098086	11.651641	10.225756	9.739452	10.052677	10.399839	11.061993	10.967611
"A_23_P113417"	8.948835	8.908335	8.678036	8.586459	9.050243	9.277344	9.345048	8.65273	8.871329	8.75518
"A_23_P113441"	5.0792704	5.526242	5.486751	6.0385804	5.451978	5.7950883	5.2166214	5.779465	5.6865153	5.738514
"A_23_P113453"	4.104506	4.414971	4.4811783	5.202981	4.9994245	4.70382	5.6083703	5.8368425	5.948716	5.593172
"A_23_P113462"	7.8313093	8.269028	8.230228	7.564886	7.12955	7.0598216	7.350576	7.439727	7.499345	7.3510504
"A_23_P113471"	11.222251	12.29607	11.447287	12.735382	10.350482	10.690199	10.315974	10.893308	10.935314	10.748247
"A_23_P113523"	12.803933	13.380292	13.027387	13.24429	12.837945	12.842144	13.257541	12.617297	12.494573	12.348826
"A_23_P11353"	12.56937	13.324001	12.561802	13.794004	12.453927	12.555602	12.7379465	12.415735	12.9708805	12.860442
"A_23_P113549"	1.6930901	1.6800166	1.7922233	1.9287455	1.7509797	1.8320076	1.7977556	1.7392374	1.7053765	1.7662336
"A_23_P113553"	1.777119	1.788902	1.8982158	2.2512543	1.9072896	2.1114953	1.9263327	1.9499459	1.7997218	1.9796875
"A_23_P113570"	2.4111416	1.947075	1.6844385	3.464057	2.80171	1.6764776	2.2094688	1.7052572	2.0494547	2.5380661
"A_23_P113572"	6.0597463	5.4404736	5.337366	5.4472117	6.605435	5.518265	7.9606977	5.7950883	5.993653	5.378804
"A_23_P113613"	5.2533007	2.6721334	3.379106	3.0908837	4.6776805	6.516508	6.4489703	5.205044	5.4841423	6.575836
"A_23_P11362"	3.083313	3.4181006	2.04778	3.2881026	1.5190847	1.8238499	3.0504391	1.5315163	1.5162866	1.532377
"A_23_P113623"	11.889495	11.482006	11.983331	11.725601	12.185497	12.204845	11.98003	12.076767	11.729589	11.76517
"A_23_P113634"	9.988102	9.849843	9.615782	9.963618	11.574166	11.469591	11.622907	10.575239	10.229995	10.461197
"A_23_P113645"	5.3619967	5.461815	5.7024703	5.0375066	6.354747	5.858727	6.0278473	7.019603	6.4571185	6.836584
"A_23_P113656"	6.538719	6.255498	5.9934826	6.4577017	5.9232955	6.740086	6.9616003	5.723206	5.9684753	5.724467
"A_23_P113682"	10.143042	10.224531	9.434303	9.746166	9.569485	10.025745	10.068521	10.456018	10.586196	10.316281
"A_23_P113692"	1.7375057	1.7887762	1.946017	2.2706022	1.8185133	2.0908282	2.0108895	1.8206711	1.7752111	1.8410242
"A_23_P113701"	8.217946	7.1560063	8.467019	8.006194	7.785541	6.3731165	7.2648125	8.14398	8.419721	8.440577
"A_23_P113716"	17.893875	16.711187	16.642645	17.400955	16.780334	15.361795	16.04961	16.711187	16.55248	16.413492
"A_23_P11372"	12.045642	12.784783	12.394966	13.033586	11.60903	11.63344	11.70928	11.63344	11.941305	12.132929
"A_23_P113728"	8.410454	8.590286	8.601128	8.281419	8.769964	9.065501	9.041613	8.443558	8.31627	8.367825
"A_23_P113738"	2.0772355	1.957542	1.505919	1.518568	1.7936171	1.5050768	1.5073177	1.4952825	1.4978029	1.4939594
"A_23_P113748"	3.5834918	7.0412498	4.865506	6.1151776	6.2449617	2.67836	3.4359417	3.891721	2.9934442	2.0006933
"A_23_P113762"	3.114873	2.232032	5.2912817	3.083313	1.5729761	2.3157423	2.1216898	4.013377	3.41749	3.337402
"A_23_P113777"	8.470989	8.096025	5.9170117	5.7844906	10.397442	2.0623038	6.6012588	9.781861	9.553239	9.443452
"A_23_P113789"	7.3086658	7.7205334	7.3423085	7.071932	7.4719543	7.9397454	7.071322	6.5604753	5.9160957	6.3122306
"A_23_P113793"	3.383871	8.291885	7.903724	4.9053473	3.6247702	4.0892315	3.1106272	4.4573874	8.772276	5.548573
"A_23_P113803"	9.624357	9.776118	9.67589	9.832777	9.862148	9.662089	10.0054655	9.812954	9.636336	9.771342
"A_23_P113811"	7.067531	6.7183747	7.401571	6.733138	6.5460873	7.146338	6.459939	8.029512	7.9672613	7.9734635
"A_23_P113825"	7.338905	5.698853	6.6970296	5.676644	8.117601	7.753962	8.719039	8.043137	8.108308	8.035794
"A_23_P113841"	2.4158664	1.9125562	3.7065217	1.9717178	1.6579808	1.7397833	1.7497431	1.6828083	1.6382946	1.6456635
"A_23_P113888"	6.990028	7.292436	7.25193	7.249064	7.003818	7.6320257	7.488933	7.2408566	7.2319126	6.935238
"A_23_P11390"	6.747103	7.0907874	6.518166	7.288861	6.6099772	6.8102794	7.0490875	6.541641	6.75506	6.3758307
"A_23_P113952"	1.8329203	1.7948396	2.0034103	2.2361908	1.890805	2.1761692	2.0319278	2.0118113	1.8187567	2.0482333
"A_23_P113966"	10.793025	10.755903	10.942754	11.528784	11.369822	11.231076	11.563628	10.902597	10.707879	10.4473915
"A_23_P11397"	4.9916525	5.1304145	4.71855	4.9946046	4.3989115	4.7941675	4.9566483	5.0560884	4.9354353	4.7419643
"A_23_P113972"	8.124732	8.5532055	8.770221	8.676266	8.457757	8.45836	8.412383	8.153803	8.507553	8.078574
"A_23_P113994"	6.5615177	5.634473	6.352082	6.3983383	6.9412155	5.648194	5.3684025	7.5326004	5.8908606	5.8540416
"A_23_P114008"	1.8822181	1.8471118	2.1395237	2.5089722	2.0082726	2.3989193	2.2018538	2.148625	1.868901	2.231078
"A_23_P114048"	3.3126125	3.475801	3.3764327	2.7367046	3.2066696	3.3729088	3.7344384	2.8308816	3.369691	2.9680076
"A_23_P114057"	11.338444	10.99763	11.80507	10.991553	12.180288	10.640635	9.859641	12.574959	12.248054	12.121425
"A_23_P114061"	9.503479	8.217268	5.756601	7.6682687	10.286507	10.512355	10.7458935	9.545996	10.18617	10.507098
"A_23_P114075"	10.362526	9.793245	10.064911	9.939041	9.927945	10.114338	10.316477	10.038554	10.296611	10.332103
"A_23_P11408"	4.1995687	5.022646	4.7903423	5.2291555	3.5715759	2.8315172	3.5809689	4.1810665	3.9304886	3.6690538
"A_23_P114084"	1.6839037	2.8743854	1.7095988	3.6639109	3.458793	3.0735898	4.963296	2.262134	2.3936098	1.7559885
"A_23_P114095"	6.916746	7.645071	6.9452515	7.273214	6.722741	7.271663	7.4630094	7.122628	7.6333838	7.3448205
"A_23_P114105"	10.332703	12.052149	10.720522	10.727989	9.76727	9.5052185	8.947402	10.050954	9.549633	9.944687
"A_23_P114118"	5.0780854	5.676644	5.332169	5.5727596	5.3436494	6.0561843	5.73331	4.2555914	4.4513597	4.1362066
"A_23_P114134"	3.7986767	3.594852	3.8179746	3.9124677	3.2048018	4.1133394	3.8331666	2.8134239	3.4102235	3.280302
"A_23_P114144"	9.476395	10.171971	9.262054	10.0730295	9.318713	9.318141	9.482418	8.901105	8.525848	9.067422
"A_23_P114155"	11.386631	12.323131	11.398972	12.2681	11.498379	11.730958	11.522557	11.4514265	11.135658	11.539498
"A_23_P114164"	11.610918	12.735382	11.852571	12.767712	11.419004	11.628569	11.161265	11.489039	11.428342	11.586715
"A_23_P114172"	9.04308	11.483684	10.335113	12.264004	10.427174	10.8883095	10.620539	10.752995	10.800433	10.892628
"A_23_P114185"	11.192737	13.205004	11.1384735	12.901928	12.217399	12.21262	11.929027	11.061016	9.832777	10.843202
"A_23_P114210"	3.855518	4.082465	4.1419787	4.482489	3.954002	3.9055123	3.954002	3.6636589	4.8513703	5.0389457
"A_23_P114221"	13.69915	14.913502	13.922472	14.717453	13.775009	13.758651	14.012111	13.295521	13.291187	13.418776
"A_23_P114232"	12.817558	14.114737	12.851874	15.379318	12.934228	13.101003	13.676993	14.17543	14.05977	14.581666
"A_23_P114259"	1.5896201	2.321425	1.675454	1.7801574	1.6341162	1.6822873	1.6928506	1.6122391	1.5834578	1.6247841
"A_23_P114275"	8.479855	9.688517	8.792206	9.385791	8.10397	8.272719	8.145684	8.82343	8.522936	9.269415
"A_23_P114282"	12.100592	13.37863	12.345136	13.460304	12.36427	12.454667	12.458151	12.9748535	12.857278	12.906604
"A_23_P114299"	6.239073	4.7530622	4.8508	4.8560247	7.4283757	3.938384	7.4003477	5.8912997	6.8177943	5.603524
"A_23_P114307"	5.1860046	4.342796	4.729308	4.6537466	4.886536	5.239488	4.8203154	4.695573	4.840067	3.9768286
"A_23_P114314"	1.9632858	3.2001684	2.7166786	2.825657	2.4694822	3.153961	3.5590281	1.6156522	2.134524	1.5348074
"A_23_P114349"	4.9959426	3.9183366	4.416965	4.552272	4.053636	4.0600996	3.3223429	5.4572897	5.878932	5.797811
"A_23_P114353"	5.8083096	11.898748	9.755599	12.5938015	11.561309	11.426715	11.742931	9.66366	9.890935	9.130313
"A_23_P114361"	10.518971	12.011603	10.621763	11.838362	10.4877205	10.510903	10.825741	11.064085	11.907791	11.183074
"A_23_P114374"	4.3809624	4.229173	4.784383	4.8306336	4.627938	4.8949738	4.614665	4.31672	4.854028	4.739293
"A_23_P114381"	4.8117704	5.297384	4.6894445	4.7188	4.458177	4.820059	4.3788676	4.124696	4.577276	4.9146185
"A_23_P114405"	11.998369	13.281353	12.321592	13.321939	12.333893	12.665524	12.270142	12.83404	12.720653	12.747291
"A_23_P114414"	6.1286936	7.6213884	6.1509824	7.173275	6.221148	6.727926	6.4280906	6.9932227	6.5879006	6.4689784
"A_23_P114423"	9.937673	12.197489	6.7973123	6.250073	10.633969	10.14071	10.73115	9.802217	9.662267	9.841088
"A_23_P114445"	7.5425134	8.985262	7.97789	9.1451435	7.3066726	7.706707	7.41841	7.7205334	7.5913086	7.455645
"A_23_P114466"	10.586196	10.753842	10.410279	11.20549	9.96863	10.198958	10.254215	10.48951	10.615163	10.984955
"A_23_P1145"	9.398753	8.99286	9.560008	9.284548	9.22944	9.396346	9.194401	9.409095	9.818153	9.447098
"A_23_P114582"	10.6596985	10.559043	10.706524	11.404843	11.408792	12.012771	11.395583	10.623615	10.809285	10.539831
"A_23_P114585"	3.1000912	3.7761292	4.1795816	3.8949995	2.9114466	5.2850223	4.178047	3.851083	3.6270785	2.9806964
"A_23_P114597"	3.3031645	1.5334675	1.5351555	1.526188	1.5388132	3.3738527	1.5281938	4.4976816	1.5563921	1.6741319
"A_23_P11461"	10.988551	11.096554	11.001395	11.086966	11.099291	10.793025	11.279471	10.959094	11.447723	11.248165
"A_23_P114616"	8.390914	8.645676	8.763652	8.478966	8.543795	8.659978	8.750627	8.387678	8.442948	8.422803
"A_23_P114626"	1.8966234	3.4169183	3.4548433	3.055934	3.0136101	5.621338	4.9740443	2.2668192	1.8059093	4.0807676
"A_23_P114649"	8.012677	7.842206	8.022689	8.001068	8.020072	8.11431	8.074329	7.826404	7.626938	7.5104113
"A_23_P114656"	13.206629	12.949016	12.936589	12.92771	12.929018	12.81345	12.418294	12.065067	12.074625	11.877359
"A_23_P114662"	9.108924	11.35445	11.572851	9.288758	10.850866	10.957101	10.366282	10.38935	10.361014	10.667039
"A_23_P114670"	11.924501	10.853088	11.758609	10.328334	10.646947	10.330239	10.513866	10.809551	11.375251	11.003549
"A_23_P114689"	10.652571	9.2173	9.38624	9.627781	10.486969	9.957705	10.277183	8.755882	10.115075	10.044468
"A_23_P114707"	7.9864864	8.05198	7.5943594	7.9258056	7.5517645	8.001886	8.033983	7.691448	7.8156137	7.603898
"A_23_P114713"	7.3935113	6.0476537	6.179486	4.5236545	6.417562	3.9098237	7.193098	7.8216577	8.46746	8.90859
"A_23_P114736"	4.7314363	4.96619	5.076708	4.924931	4.5644894	5.190263	4.4395924	4.4931846	5.012887	4.155301
"A_23_P114740"	10.752746	7.2774734	9.97748	8.754015	11.996254	7.4062824	8.600112	10.619775	9.805664	9.956367
"A_23_P114774"	12.114704	12.855491	12.903402	12.426322	12.338673	12.161263	11.871378	12.742757	12.908197	12.931615
"A_23_P114783"	11.927681	11.724736	12.142727	11.989027	11.632645	11.863025	12.163371	12.188293	12.421696	12.214837
"A_23_P114808"	8.74216	9.310557	8.718426	8.532097	8.605761	8.9837475	9.458485	8.129564	8.429283	8.315041
"A_23_P114814"	6.2135024	4.5494547	4.7747645	5.79558	8.153506	10.596472	10.394752	6.64509	7.8827205	7.944122
"A_23_P114826"	10.986749	11.31575	11.027928	11.188381	11.470369	11.772112	11.696657	10.985527	11.380617	11.189663
"A_23_P114839"	6.1454306	6.6179223	6.653951	6.288215	6.567591	5.7200193	5.8943324	6.388533	5.018549	5.4060764
"A_23_P114857"	1.8520329	1.5388132	1.5720515	1.6318607	1.8747206	1.564737	1.5870254	1.5311975	1.565806	1.5464057
"A_23_P114862"	7.20032	9.321296	7.819829	10.093897	10.674758	12.732095	13.193446	8.257055	8.903157	8.133064
"A_23_P114879"	8.861935	9.026464	9.351024	8.766633	9.018606	9.578937	9.751989	9.6067915	10.019558	9.966617
"A_23_P114883"	11.907125	7.5084767	11.18582	10.100801	12.1166115	6.795042	8.638321	12.36427	12.952521	12.946919
"A_23_P114903"	7.153626	7.165992	7.2319126	8.484005	8.836388	5.9071517	7.9272847	8.150547	6.6378093	7.151305
"A_23_P114929"	13.270686	13.1321335	13.474416	12.999876	12.699039	12.738719	12.900734	12.70962	12.407768	12.938782
"A_23_P114934"	2.2367725	6.385763	1.7783082	7.0861506	5.2562127	6.7677903	7.1021905	4.890478	1.9442528	4.8283806
"A_23_P114947"	11.154535	13.451641	13.914355	11.828609	12.278869	10.263926	11.176645	12.396717	14.155328	14.132024
"A_23_P114952"	11.549009	11.397071	11.889121	11.570675	11.228879	11.415367	11.78456	11.260158	11.086966	11.275018
"A_23_P114968"	5.4200354	6.7437577	5.34068	6.418636	4.7642965	5.1621084	4.503323	4.6143603	4.962743	5.06787
"A_23_P114983"	6.3884015	1.9657646	3.4917946	1.5545061	5.176996	1.561395	3.059726	5.0199614	1.5274823	1.5542216
"A_23_P115011"	2.893705	3.2764091	2.9680076	1.555039	4.0395703	3.0113988	1.5369867	3.0872335	1.5036025	2.7305546
"A_23_P115021"	2.317817	4.2089324	2.4318147	3.3557615	3.464057	1.7163393	3.3755128	6.2135024	4.943141	4.1617355
"A_23_P115022"	12.058059	10.955172	11.953461	11.304432	8.273688	11.219175	10.184905	13.261291	13.30607	13.350439
"A_23_P115036"	9.143815	10.128432	9.361788	9.812149	9.379509	9.3235035	9.67996	8.578644	8.315041	8.534532
"A_23_P115046"	9.55068	9.580108	10.041115	9.412165	9.195962	9.522792	9.431458	10.17539	10.020381	9.81799
"A_23_P115052"	5.6644855	5.803947	5.649971	5.7217207	5.8145533	5.705459	5.6969066	5.829618	5.7738385	5.9170117
"A_23_P115064"	11.165527	13.816915	12.49937	12.697996	9.593684	8.30547	8.845624	8.802447	10.424374	10.195929
"A_23_P11507"	9.141166	8.910572	9.654333	9.389619	9.271758	9.347564	8.504581	9.431262	8.962419	9.082677
"A_23_P115091"	10.911527	11.022457	11.013316	10.279011	10.159456	10.5956	10.33574	9.772172	10.384829	10.5839205
"A_23_P115105"	11.343107	10.973896	11.157225	11.012761	11.013656	10.998902	11.191409	10.755705	10.9509945	11.073011
"A_23_P115118"	15.032667	15.024556	14.936486	15.00882	14.981333	15.000871	15.382097	15.371501	15.369986	15.136399
"A_23_P115124"	9.093856	8.806613	8.833573	8.66108	8.823232	8.955674	8.647281	8.643614	8.374361	8.400345
"A_23_P115137"	13.816915	14.202535	14.299107	14.149793	13.869217	13.898227	13.296551	13.700816	13.564855	13.7433
"A_23_P115149"	10.038359	10.379105	10.295757	10.470488	9.718418	9.74567	9.146675	9.593915	9.211797	9.55659
"A_23_P115161"	6.3992996	7.648308	6.123804	7.5094833	9.948141	7.681338	7.4671307	6.000376	5.6576605	4.8657155
"A_23_P115167"	9.360586	8.976082	9.401783	8.958155	9.242552	9.036627	8.731961	8.835188	8.6453495	9.036627
"A_23_P115190"	4.3519855	5.4068084	5.1613736	5.057035	5.2942376	5.2239733	5.2473974	4.8791246	5.2519093	4.8237867
"A_23_P115192"	1.508485	1.6482605	1.5242698	1.5447874	1.5123441	1.5231994	1.5286388	1.508727	1.5110636	1.5073957
"A_23_P115200"	1.6778436	1.6399035	1.6961509	1.6921151	1.6755867	1.7108111	1.6623093	1.7481387	1.676908	1.7455244
"A_23_P115201"	1.5851178	2.0908282	1.6106951	2.0778978	1.6015635	1.6411955	1.7844439	1.645878	1.601457	1.6590457
"A_23_P115202"	5.3398714	5.731514	5.6735654	5.46137	5.415327	6.031251	5.0275903	5.0732427	5.190499	4.4693313
"A_23_P115215"	11.621141	11.698391	11.521459	11.447287	11.1683445	11.196947	11.3371105	11.201743	11.248526	11.027082
"A_23_P115223"	13.271402	13.645508	13.630936	13.604449	13.512093	13.65966	13.8711405	13.556954	13.452933	13.431052
"A_23_P115246"	6.6891193	6.6743417	6.8550997	5.9028	5.2595563	5.519658	5.4599705	7.9215097	6.6152515	6.21195
"A_23_P115261"	10.065652	6.247676	9.184664	9.820269	11.565194	13.375139	13.682444	9.646193	8.317799	8.0884075
"A_23_P115286"	9.279536	8.883627	8.760536	9.270199	9.222181	9.143026	8.240125	9.191838	9.465696	9.464814
"A_23_P115313"	12.299227	12.34215	12.314415	12.410124	12.048075	11.936029	12.505837	12.199538	11.707938	11.638483
"A_23_P115316"	11.557672	11.875298	11.655145	11.802161	11.503849	11.353846	11.825277	11.34801	10.5562935	10.709109
"A_23_P115331"	11.522557	11.729589	11.331161	11.719833	11.524787	11.926942	11.983692	10.800242	11.08318	10.873001
"A_23_P115346"	9.791784	9.766446	9.659269	9.589573	10.122717	10.127705	10.04805	9.8544235	9.647181	9.835073
"A_23_P115356"	12.944434	13.145942	12.930627	12.801256	12.747291	13.307279	13.349129	12.643541	12.5786085	12.850807
"A_23_P115366"	9.558807	9.653971	9.597117	9.979567	9.524084	9.400648	9.666157	9.75152	9.087232	9.696052
"A_23_P115375"	13.679596	13.133924	13.480442	12.470512	13.309736	12.858119	12.524135	12.296788	12.648763	12.721518
"A_23_P115407"	9.979337	10.279812	10.319699	9.810361	9.546492	10.919181	9.192217	9.371261	8.980619	8.889741
"A_23_P115417"	12.074625	10.744348	11.507735	11.462159	11.781978	11.688828	11.824163	11.904009	11.7868595	11.377735
"A_23_P11543"	12.495395	11.85578	11.107759	12.100592	11.906668	12.0876045	12.053638	11.469591	11.552282	11.584941
"A_23_P115444"	2.2636669	3.2368758	1.6249907	3.2423604	2.0938892	3.2008789	4.139393	2.4717655	1.9573005	2.6717503
"A_23_P115460"	11.936029	11.919793	12.263684	12.333893	11.755259	12.083649	11.377253	12.270529	11.742931	12.096743
"A_23_P115467"	5.976085	6.61756	6.6597333	6.603847	6.5621996	6.5066223	6.2513256	6.7624955	8.002504	6.688752
"A_23_P115478"	2.1839368	2.9375615	2.134524	1.761806	2.437089	2.7093916	1.6883339	1.681065	2.2774584	1.6772532
"A_23_P115482"	9.694225	11.068355	10.817351	11.006773	9.357771	9.398753	10.7396755	8.90207	8.986152	9.173883
"A_23_P115492"	12.009384	9.690605	8.886957	11.841009	7.826855	7.840109	7.7654257	9.444294	8.89411	10.307021
"A_23_P115519"	3.8742902	3.9548671	3.7514682	3.8243437	4.2209167	4.529647	4.2913	4.548892	5.5489316	6.0892777
"A_23_P115523"	7.8618417	8.282399	7.889591	8.355121	8.065476	8.206657	8.754482	7.9039073	8.406234	7.700018
"A_23_P115534"	10.738258	11.008592	10.833147	10.732431	10.642368	11.078222	11.275571	9.936616	10.220496	10.179698
"A_23_P115563"	1.7145568	1.6713295	1.7481387	1.7665597	1.7228411	1.7769579	1.7239358	1.7946923	1.7101461	1.7943797
"A_23_P115573"	12.735382	12.114282	12.041788	12.150867	11.808605	12.760706	13.34044	12.82038	12.774564	12.754233
"A_23_P115597"	8.66108	8.587275	8.1662	8.514953	8.047633	8.269617	8.879317	8.689477	9.222732	8.351594
"A_23_P115608"	8.355845	9.311924	9.1244135	9.364624	9.214073	8.92922	9.207943	9.091939	8.576679	8.663219
"A_23_P115616"	6.603567	6.7537894	7.0903673	6.484042	6.6449146	6.613589	6.3104396	6.8330927	6.86376	6.702161
"A_23_P115636"	6.0097084	5.867088	5.959648	6.102875	6.574988	6.3637605	7.0778856	6.091448	5.9527235	6.2953825
"A_23_P11564"	12.622515	12.185497	12.133478	12.349571	12.244564	12.132426	12.92594	12.262061	12.341479	12.59013
"A_23_P115645"	7.369165	7.158446	6.1021214	3.5599785	8.108308	8.576679	7.888139	8.385717	8.034165	7.8560705
"A_23_P115652"	6.0388517	6.0810204	3.632447	5.435753	5.3220654	5.8683686	5.7716656	4.237478	4.6985555	3.7418613
"A_23_P115683"	12.260624	11.702731	11.585333	11.925912	11.946964	11.926467	12.16419	11.720487	11.454747	11.632201
"A_23_P115699"	8.793924	9.302291	9.30304	8.862552	9.007085	9.145516	9.317112	7.977019	8.168826	7.8568287
"A_23_P115703"	7.5866246	7.4866805	7.923751	7.6111155	7.829673	7.580229	7.434584	7.743995	7.314185	7.5686913
"A_23_P115726"	9.449461	10.751505	10.252184	11.239679	10.1581	10.909448	10.961889	10.82097	9.998368	9.776118
"A_23_P115732"	11.968824	11.325764	11.919298	12.1342	11.844331	12.187221	11.795534	12.085598	11.566191	11.858743
"A_23_P115743"	8.257364	8.159417	8.180707	8.47516	8.096547	8.314166	8.328066	7.9392815	8.245447	7.9142475
"A_23_P115762"	9.875956	9.978649	9.822113	9.357771	9.635093	10.024328	9.706436	10.07425	10.196757	10.096489
"A_23_P115780"	1.7217728	1.7116747	2.390989	2.0362003	1.789762	1.8916513	1.8495563	1.7745678	1.7386199	1.8050103
"A_23_P115785"	9.911539	8.6185255	9.014341	9.287356	8.43745	8.320725	7.432265	9.810965	9.842002	9.399376
"A_23_P115792"	11.249517	11.870834	11.238114	11.672431	11.5256195	11.632942	12.045084	11.710953	12.323131	12.111142
"A_23_P115805"	4.087512	4.2835555	6.6963706	4.0220184	5.4757648	4.195344	6.460946	3.9298034	4.6408806	4.781744
"A_23_P115824"	12.302335	11.835815	12.469683	12.168291	12.14993	11.948716	11.887669	11.837455	12.108456	12.021322
"A_23_P115838"	5.5453925	5.796648	5.1439824	5.45057	5.7884054	6.0453954	6.642698	5.7609296	5.5057144	5.8264318
"A_23_P115842"	10.416909	10.237448	10.47543	10.328529	10.499978	10.435554	10.5817995	10.504068	10.68871	10.59974
"A_23_P115861"	5.6920815	5.6487494	5.588197	5.9822073	5.2078857	5.058202	5.115143	6.403706	5.8752875	5.836609
"A_23_P115862"	11.104683	10.8844595	11.354867	11.018865	10.552097	10.873793	11.554039	11.50481	12.084402	11.872649
"A_23_P115872"	3.8366723	4.875657	4.2021413	4.6749363	4.5380282	4.4788594	5.838183	2.948346	4.5836477	5.8166747
"A_23_P115885"	8.048166	7.9866624	8.086708	8.122279	7.969055	8.26185	8.04896	7.7186184	6.3421082	7.594941
"A_23_P115902"	10.619992	10.848627	11.443877	11.40574	10.848833	10.452083	10.4581785	11.173777	10.890705	10.774487
"A_23_P115919"	10.094498	10.102813	10.318503	9.736888	8.732897	8.881741	9.324514	10.282089	10.421384	10.422282
"A_23_P115922"	11.44641	11.389207	11.160446	11.767227	11.626485	10.792744	11.231334	12.148307	12.046992	11.935051
"A_23_P115932"	1.7922233	1.809529	1.9694947	2.361147	1.9593968	2.1973166	2.0432253	1.9901166	1.8215647	2.0420518
"A_23_P115955"	13.334912	12.591032	13.369837	13.336503	13.608723	13.721284	12.808875	13.125899	13.158882	11.626858
"A_23_P11598"	6.2042017	6.50712	6.6725717	6.39309	6.6378093	6.688317	7.067811	6.5661564	5.226092	5.373573
"A_23_P115998"	4.6847243	4.5268087	3.1631656	3.3191319	5.43538	4.4202614	4.936239	4.018764	4.4858932	6.549091
"A_23_P116007"	10.467494	10.64812	10.044977	9.861085	10.312916	10.945046	11.759989	8.915245	9.133819	9.465379
"A_23_P116013"	5.1487536	5.030155	5.0166388	6.747103	4.624859	5.249617	1.6967297	5.8836517	4.391372	5.762193
"A_23_P116016"	9.051555	9.247031	9.23657	9.854648	8.788679	8.922276	8.486705	9.684676	9.390509	9.494574
"A_23_P116025"	8.309371	8.437917	8.534532	8.352097	8.067727	8.435495	8.498435	8.4182625	8.074773	8.280803
"A_23_P116037"	10.974363	10.845047	10.566589	11.147903	10.521658	10.045269	9.991911	8.922802	8.93985	9.371502
"A_23_P116081"	13.907283	13.615038	13.946176	14.007652	13.700816	13.589629	13.684897	13.387311	13.583755	13.676993
"A_23_P116091"	8.448482	9.632082	9.248664	9.49195	8.676515	8.582477	8.855086	8.410098	8.272963	8.195377
"A_23_P116114"	5.8592763	8.994317	8.710276	8.574858	7.980599	5.61228	7.842593	8.268576	9.916782	8.724732
"A_23_P116123"	4.32681	5.8836517	4.3164454	4.768178	4.5673566	5.2529097	5.471852	4.50078	4.221683	4.254356
"A_23_P116145"	1.5289013	2.1482031	1.5639286	1.6131157	1.5350193	1.5564607	1.5749336	1.5231994	1.5200981	1.5390223
"A_23_P116168"	10.348888	10.288486	10.66407	10.277644	10.106289	10.412039	10.484307	10.151831	9.413108	9.966118
"A_23_P116173"	9.634244	9.111399	8.242537	8.016429	4.1688414	1.6658671	2.2942805	6.1766143	6.545533	6.964978
"A_23_P116187"	7.9954844	9.476813	8.436735	8.969099	7.061564	5.3831744	6.923089	7.662869	8.0400305	7.887433
"A_23_P116195"	7.2024713	9.460926	8.125985	8.770508	10.8841715	12.135059	10.706086	8.781835	7.1527333	9.106197
"A_23_P116207"	10.2645855	10.016347	10.185539	10.104733	9.996622	10.576111	10.195099	10.19306	9.593684	9.928891
"A_23_P116235"	14.1369915	14.483873	13.569985	13.80181	13.502666	13.807865	14.581666	15.096481	14.8080435	15.626926
"A_23_P116249"	7.3823614	5.2385035	5.432063	5.264528	1.5820384	1.6229283	1.6506947	1.5625637	1.5479128	3.5382495
"A_23_P116259"	8.008938	10.221284	8.289712	10.22247	8.224553	7.629676	8.032458	6.5536847	7.564886	6.2004185
"A_23_P116264"	7.8172565	9.213508	6.682108	7.4070587	9.022384	8.11095	9.375999	7.4627147	7.28224	7.151453
"A_23_P116280"	3.409608	1.7010753	2.429617	1.8283275	1.9488056	1.8149536	2.7354834	1.8424829	1.7315196	1.8427659
"A_23_P116286"	12.048075	11.929499	12.404602	12.841282	12.539339	12.187704	11.89121	12.171096	12.1317425	11.742931
"A_23_P11629"	12.747291	13.349129	12.732095	13.82318	12.814735	12.649393	13.27705	12.236847	12.883583	13.405925
"A_23_P116371"	3.7155557	4.190297	3.8470283	3.691775	4.1763372	3.426422	6.292615	3.3195374	4.281802	3.3678293
"A_23_P116376"	8.630894	8.943533	8.721234	8.32043	8.861056	9.117456	9.191838	8.8277645	9.239608	8.722859
"A_23_P116387"	5.898882	5.3311033	4.854028	5.905222	4.9104977	5.744452	6.505769	4.9718604	5.2155304	5.7687426
"A_23_P116414"	13.161077	13.108701	13.318128	13.176491	13.592279	13.120933	12.805377	13.873455	14.118769	14.217238
"A_23_P116430"	7.973188	4.709776	6.523365	5.2469726	3.9731119	8.831643	6.320137	6.4768786	8.18087	7.3074675
"A_23_P116435"	6.257645	6.527913	6.347678	6.479776	7.901247	6.488555	6.7181153	6.8390436	6.7450585	6.4837637
"A_23_P11644"	7.62036	4.3647704	4.225847	4.877836	4.3890815	4.5427437	4.635399	3.8307047	3.5648644	3.754156
"A_23_P116473"	2.323652	1.5037707	1.5150785	1.5122479	2.557132	1.5594821	1.5458896	4.648612	1.5105286	1.5315914
"A_23_P116512"	5.0417933	3.7338927	4.974871	3.6765432	6.1177144	4.2836866	5.9627066	6.086296	5.1994863	5.245379
"A_23_P11652"	10.261468	10.0492935	10.067176	10.335113	10.312283	10.263362	10.213273	10.611891	10.464797	10.578564
"A_23_P116523"	4.0308433	4.237124	4.104506	3.5557723	3.6273365	4.0011363	3.7166095	3.6112418	4.6008625	3.7338927
"A_23_P116533"	9.370107	9.586284	9.426663	9.306682	9.134738	8.77736	8.723652	9.1929245	8.601626	8.627442
"A_23_P116557"	7.9449415	6.776163	6.2514625	5.8818583	8.212561	7.0721297	7.3450484	5.7489786	5.726314	5.7372856
"A_23_P116578"	7.764406	7.3823614	7.5947533	7.2418623	7.491125	7.3858314	7.1008606	7.4384875	8.056433	7.471295
"A_23_P116587"	4.825453	4.8529363	4.478318	4.6181116	4.382363	4.850371	4.28487	4.542045	4.5950813	4.9642076
"A_23_P116602"	13.854356	13.773419	14.077209	13.673633	12.104441	12.232763	12.238526	12.509304	12.307716	12.622515
"A_23_P116614"	11.923009	12.1342	11.815077	12.273592	12.007489	11.671226	12.084117	12.307716	11.983331	12.141329
"A_23_P116624"	4.598136	5.298593	5.0017056	5.3927875	5.5660677	5.54047	5.0114913	5.2411337	5.134694	4.77818
"A_23_P11664"	12.0445175	12.173762	12.148307	12.378325	12.285615	12.396717	11.419004	12.2109785	11.859228	12.01578
"A_23_P116640"	1.6224186	3.8937225	1.7229676	1.8412995	1.6807327	3.1217666	1.7457174	1.6646206	1.6287934	1.6743534
"A_23_P116642"	8.595293	8.157125	7.935069	8.649519	8.535845	8.372061	8.062068	7.466757	7.6595807	6.4980116
"A_23_P116653"	2.3116705	1.5397809	1.5625637	1.5715294	1.5587468	1.5755488	2.8094597	1.5731075	3.4633465	1.5633723
"A_23_P116679"	10.862824	10.786514	10.836483	10.619662	10.867682	10.821291	10.607482	10.629038	10.453177	10.73115
"A_23_P116682"	8.686578	9.117977	8.759376	8.670223	8.445993	8.722239	8.613541	7.760227	7.6199193	7.894279
"A_23_P116694"	15.281961	15.666633	15.586306	15.588872	15.851136	15.714372	16.05301	15.44126	15.801414	15.638648
"A_23_P116712"	6.9875927	7.7386394	7.7406464	7.9138603	7.7394986	9.309311	8.083254	8.57296	9.290068	8.714619
"A_23_P11674"	1.728147	1.7139852	1.8271849	2.0254934	2.9308918	1.8988032	1.8474002	1.7969388	1.748598	1.8181345
"A_23_P116741"	1.818031	1.8338692	2.018579	2.4202142	1.986633	2.3006563	2.0511017	2.056391	1.8564624	2.0891361
"A_23_P116743"	13.307279	12.676807	13.542927	12.887982	13.05411	13.278039	12.968434	12.691548	12.814735	12.021736
"A_23_P116765"	1.6198763	1.620611	1.7130474	1.7084597	2.5994523	1.7837021	1.6520166	1.7077595	1.6514922	1.7249101
"A_23_P116797"	11.2045965	11.040109	10.974166	10.895625	14.293276	11.364844	11.020911	11.196603	11.315439	11.015524
"A_23_P116809"	9.681299	9.752359	9.602591	9.873544	9.697711	10.172805	9.8741455	9.898111	9.420521	9.876141
"A_23_P116829"	9.707642	10.099381	10.090891	9.967957	9.743914	9.770539	9.564947	8.713524	8.358875	8.986152
"A_23_P116840"	10.194289	10.129219	10.054859	10.385108	10.394371	10.310974	10.416909	10.177728	9.600834	10.325958
"A_23_P11685"	6.5947556	4.470129	6.5733924	4.801661	5.666193	4.2275944	4.209526	6.698414	6.8279085	6.61934
"A_23_P116850"	2.0074947	1.5599016	1.5830469	1.5936933	1.5793016	1.6057248	1.5685056	1.6054653	4.556632	3.3300755
"A_23_P116868"	4.7095075	3.2954245	5.171033	3.9108667	3.997878	3.9770346	3.9507108	8.80869	3.474275	4.1866193
"A_23_P116872"	7.1055975	7.1119146	6.794201	7.3020396	6.600813	7.4352074	7.006951	7.7021275	7.3522587	7.214762
"A_23_P116890"	8.427078	8.343193	7.41841	8.070191	7.892739	7.785816	8.293775	7.7228746	8.295025	7.8178034
"A_23_P116898"	14.945537	13.170109	13.809361	15.024556	15.156673	13.079154	13.291187	14.6352625	14.449758	13.769203
"A_23_P116902"	4.372411	3.7467158	4.153525	1.777119	1.6154603	1.6706474	4.19423	1.5924414	1.8119642	1.5630374
"A_23_P116913"	9.325525	8.63986	8.977451	8.8484535	8.820618	8.841261	9.255514	9.247031	9.986556	9.631089
"A_23_P116942"	8.734175	5.5899954	6.4289265	6.362067	9.50169	7.3173523	8.326542	7.440622	7.295266	6.369497
"A_23_P11697"	4.918133	4.937207	4.3014016	4.699862	4.8271346	4.909786	4.9330525	3.9773386	4.5422277	4.1993704
"A_23_P116980"	6.754475	6.8743653	7.489817	7.695031	7.4581375	7.533973	7.537407	8.028473	9.070061	8.169774
"A_23_P116999"	9.215843	9.336521	9.517733	9.281664	9.435418	9.50765	9.637224	8.491903	8.336878	8.733771
"A_23_P1170"	7.259858	7.2748013	7.2963343	7.2635694	6.2357044	6.393598	5.0907807	6.596926	7.114635	6.7919025
"A_23_P117037"	11.578016	10.933042	11.379722	11.111995	11.710476	12.240592	11.838362	11.826753	11.20134	11.413891
"A_23_P11705"	11.781978	12.72726	11.814173	12.446385	12.178976	12.288263	12.240592	12.169819	11.929027	12.053638
"A_23_P117059"	5.4149055	6.741169	5.916312	6.060681	6.9118557	7.0830345	7.9814835	6.6205378	6.730313	6.8623424
"A_23_P117068"	13.035546	12.983274	13.344578	13.1569605	13.038481	12.851874	12.919641	12.938782	13.092053	13.023957
"A_23_P117082"	12.27535	11.157827	11.7442465	10.799746	11.647123	11.51784	10.297231	12.420985	12.379918	12.183893
"A_23_P117095"	1.5962856	2.5538378	1.674954	3.212692	1.6334807	1.6802301	4.535496	2.1494794	1.59084	2.0101006
"A_23_P117104"	9.407909	7.9258056	8.241124	7.228932	8.682393	5.4532514	6.7919025	9.826085	7.1154575	6.491883
"A_23_P117125"	6.221	6.002539	5.946495	5.840245	6.2194223	5.7888126	6.0716105	6.0207887	6.4847693	5.994843
"A_23_P11713"	11.00727	11.031661	11.002027	11.094381	11.111254	11.462662	11.610918	11.327763	11.476045	11.406993
"A_23_P117146"	9.07454	9.028935	9.055783	9.24921	8.86587	8.889253	8.8237505	8.500741	8.372679	8.502733
"A_23_P117157"	9.859641	9.887868	9.959731	9.671099	9.722991	10.3098135	9.967957	9.685114	8.976082	9.73895
"A_23_P117163"	11.151901	11.528784	11.137735	11.530064	10.2172	10.424789	10.129364	10.586513	10.2040615	10.741853
"A_23_P117175"	9.358017	9.079755	8.859956	8.787959	8.930383	7.0081825	8.247903	9.203142	8.519185	8.886179
"A_23_P117190"	11.534439	12.870735	12.785918	12.759331	12.646231	12.831474	12.851376	12.638434	12.652863	12.706934
"A_23_P117198"	12.70962	12.793464	13.14414	12.755065	12.594893	12.6664505	12.303189	13.211383	13.470471	13.455695
"A_23_P117225"	11.415367	11.593369	11.376226	11.70928	11.776678	11.702731	11.571521	12.084402	12.117309	11.833742
"A_23_P117238"	8.433216	8.477902	8.523663	8.638925	8.806934	8.690459	8.347786	8.201417	8.000786	8.592312
"A_23_P117242"	3.2177079	2.8161626	3.0380847	2.679051	3.3142393	3.3283763	3.566316	3.2069356	3.110266	3.2341287
"A_23_P117261"	1.8727744	1.6505511	2.7483616	2.9258678	2.9157112	1.8225548	1.7794145	1.6854817	2.13723	1.6818278
"A_23_P117274"	8.338018	8.06505	8.443558	8.167274	7.576977	7.9399295	7.9907646	7.7685385	6.8772945	7.609363
"A_23_P117286"	9.882968	10.451645	10.312283	10.510903	10.122309	9.946329	10.103435	10.52681	10.359006	10.719049
"A_23_P11729"	6.3852005	6.610744	6.5324035	6.9253225	6.746426	6.4100103	6.5628963	6.0751457	6.064421	6.126866
"A_23_P117298"	5.812877	5.3455973	6.1036153	5.0877905	5.438729	5.4025254	5.337138	5.455512	5.5681825	5.481896
"A_23_P1173"	2.8887675	2.7079258	2.4607043	1.8021549	2.797564	2.6853528	1.8074815	1.7651076	3.632447	2.661526
"A_23_P117302"	7.780855	7.6979785	8.0181465	7.4210916	7.6355553	7.4795065	7.378352	8.181208	7.665885	7.44593
"A_23_P117346"	12.967836	12.910967	12.78808	13.019634	13.014557	12.733276	12.987533	12.609999	12.579855	12.57161
"A_23_P117363"	8.407403	8.143228	6.3762665	7.2837067	6.910544	6.9476604	7.2203856	6.628066	6.902651	6.566022
"A_23_P117380"	8.068452	7.063407	7.1533427	7.16821	6.7183747	7.050278	6.9418416	8.2907	9.127285	8.965896
"A_23_P117387"	1.901345	2.8883903	2.2348394	2.71051	1.7956597	3.2740462	2.5109293	2.8707988	2.1649978	2.1814575
"A_23_P11739"	3.927048	4.745753	3.926585	4.6250963	4.1459484	4.620823	4.6655107	3.459136	4.3164454	3.9243124
"A_23_P117411"	5.7110324	6.1682644	7.673993	6.0147085	5.776949	5.160905	5.0038934	5.137537	6.2360325	5.654005
"A_23_P117416"	10.627504	10.552352	10.536016	10.14606	10.644619	10.809551	10.757653	10.407761	10.826359	10.427174
"A_23_P11742"	15.407931	14.761703	15.113913	15.138781	15.116469	15.244243	15.496091	14.8871975	15.01484	14.704575
"A_23_P117424"	8.697901	10.699378	10.328734	10.361014	10.32985	10.587148	9.055013	9.823139	9.941832	9.836415
"A_23_P117437"	1.8632672	1.8238499	2.073401	2.3775828	1.9615812	2.2856576	2.1223693	2.9605894	1.8481208	2.157202
"A_23_P11744"	14.205756	13.838291	13.963218	13.992547	13.7790165	13.886492	14.237133	13.704581	13.925943	13.517493
"A_23_P117447"	11.022457	11.645491	11.183349	11.640258	11.656623	11.259993	11.482006	11.626485	11.320018	11.430631
"A_23_P117464"	4.216989	3.2306852	3.6153843	3.2947834	2.04778	3.7177556	3.3076105	4.788453	4.9379525	5.1484003
"A_23_P117480"	1.9054587	1.6587029	3.0310805	2.2517912	2.6548748	1.7810578	3.3611999	2.667321	4.4232926	1.7463608
"A_23_P117494"	10.440411	10.656465	10.732082	10.00779	10.84982	10.926738	10.864521	11.207758	10.980363	10.8781805
"A_23_P117506"	11.284373	11.7343235	11.236715	11.871731	12.154796	11.979739	11.663132	11.797283	11.444393	11.897357
"A_23_P117515"	7.105275	7.589336	7.52792	7.413331	6.952309	7.0462713	7.1184154	7.126977	7.0323777	7.067323
"A_23_P11752"	5.282768	5.270383	5.0307636	4.973843	4.8735843	5.1934013	5.144691	4.7346115	5.092986	5.181399
"A_23_P117527"	9.590274	9.4334345	9.770321	9.828085	9.401783	9.553054	9.52746	9.689409	9.648409	9.661497
"A_23_P117540"	6.295896	6.403706	6.328407	6.71085	6.7137966	6.9305253	7.185757	6.937692	7.4598885	7.290514
"A_23_P117546"	10.120839	10.154527	9.955535	10.579696	9.960825	10.43056	10.527136	9.769609	10.094131	10.019792
"A_23_P117558"	12.207647	12.418294	12.521321	12.604787	12.717188	12.547891	12.860442	12.286409	12.37468	12.387956
"A_23_P117580"	3.770045	5.225559	4.315754	4.9288187	4.539726	5.259787	5.3414717	4.3229136	4.607984	4.6261353
"A_23_P117582"	10.084006	11.133685	11.268212	10.967895	10.742299	10.826359	9.345567	10.700026	10.8804	10.194563
"A_23_P117599"	11.91554	11.984712	11.874228	12.099611	11.79311	11.695118	12.032517	11.354867	10.734862	11.419004
"A_23_P117602"	7.785816	7.103468	6.9093394	7.1533427	8.639238	6.766418	9.031103	7.397366	7.0168443	8.269252
"A_23_P117623"	9.07573	9.1612	8.777852	9.243561	8.899607	9.294709	9.615629	9.829264	9.406854	9.557332
"A_23_P117635"	8.24558	7.3960013	8.0386505	7.739644	7.764406	7.9574327	7.71594	7.935069	8.1365185	7.993956
"A_23_P11764"	10.955172	11.123435	10.991553	11.398972	10.629405	10.479614	10.894291	10.774687	10.794111	10.710163
"A_23_P117654"	8.834178	9.287054	9.219843	9.278098	7.97789	7.8888474	8.701156	9.504109	9.483312	9.424034
"A_23_P117662"	12.184719	8.5279665	10.353305	9.744693	8.783366	5.972035	6.0271907	6.990962	7.837325	7.1000385
"A_23_P117679"	6.641756	7.0237093	7.0231256	6.936194	7.179919	7.719185	7.367109	7.1196833	7.639127	7.0903673
"A_23_P117683"	11.951855	11.937468	12.065809	11.99173	12.056396	12.048492	12.169819	12.795979	13.113693	12.952521
"A_23_P117694"	5.9007506	6.871203	6.9471855	5.646151	5.82018	5.5466056	6.1821656	6.3491893	5.1619267	4.895149
"A_23_P117721"	15.696642	15.731724	15.925797	15.806522	15.579544	15.778646	15.259954	15.896244	15.645548	15.8248415
"A_23_P117727"	8.307911	8.765146	8.334839	8.497324	8.106769	8.241352	8.460884	8.022263	7.5519915	7.972417
"A_23_P117734"	9.374709	9.615782	9.53364	9.425817	9.312874	9.398399	8.981363	9.604783	9.142134	9.112394
"A_23_P11774"	9.592428	10.064546	9.908856	9.7531395	9.456806	9.790328	9.842002	9.480506	9.643393	9.620133
"A_23_P117743"	7.4723597	7.4931045	7.618371	7.9974413	7.7075496	7.8355803	7.5428777	7.966967	7.3487983	7.672323
"A_23_P117759"	6.4529414	6.704762	6.9159894	6.7580147	6.259322	6.6698284	6.5548844	6.330698	5.9832773	6.5028515
"A_23_P117767"	9.807464	9.6397	9.861813	9.682517	9.603307	9.812149	9.861604	9.230251	9.277344	9.337259
"A_23_P117778"	8.943919	9.467726	9.102695	9.00965	8.629457	9.093104	9.200783	8.079197	7.9335527	8.2109785
"A_23_P117782"	12.204406	12.199538	12.217399	12.398155	11.774002	11.732788	12.021322	12.186355	11.977852	12.011603
"A_23_P117797"	9.309619	9.560452	9.675336	9.254103	10.278686	10.383515	10.742672	7.7909136	7.6836085	7.7513776
"A_23_P117805"	6.2252135	7.025509	6.816102	6.99579	6.2970314	6.6987586	6.8926973	6.521939	6.9380984	6.46194
"A_23_P117828"	1.8091438	1.827773	2.0046546	2.4038794	1.9807417	2.2719896	2.048976	2.0440733	1.842659	2.0787666
"A_23_P117833"	3.2932198	3.3158472	2.7790277	3.3678293	3.5094001	2.802106	2.3643343	3.1631656	3.3411853	2.3529508
"A_23_P117851"	6.537726	9.548509	7.230001	9.887175	5.1154175	7.9774914	7.848053	9.043306	11.478184	10.771851
"A_23_P117852"	5.613326	7.11265	5.7829347	5.662676	6.97359	6.701019	8.565463	5.9848385	5.955648	6.652247
"A_23_P117862"	11.352897	11.409111	11.390082	11.383537	10.744079	10.392031	10.344182	11.492572	11.868077	11.556875
"A_23_P11787"	6.5370755	9.418706	6.7728815	6.2331333	3.9661481	6.389476	4.033703	7.769063	8.488284	9.838373
"A_23_P117873"	2.6231096	5.230285	2.900468	4.696515	2.1753788	6.541641	4.1931195	3.7557485	3.6269348	3.639607
"A_23_P117882"	12.688866	12.722985	12.453044	10.597006	9.595256	10.69483	9.305202	9.47559	9.129763	9.507825
"A_23_P117896"	4.6168456	4.6239605	4.503323	4.395948	4.7435584	4.304728	4.745992	4.1561284	4.3996077	3.8401046
"A_23_P117912"	7.4215784	5.4943023	6.8549204	6.524765	4.9453974	4.0442305	4.4805717	5.7880697	7.79639	7.972104
"A_23_P117928"	12.503413	12.766119	12.120587	12.278869	11.315439	11.300974	10.964388	11.470788	11.263083	11.54737
"A_23_P117933"	11.973803	11.990704	12.103631	11.983331	12.083649	11.77775	11.900399	12.340245	12.061062	12.494573
"A_23_P117943"	10.2650585	10.084249	10.05328	10.230987	10.191192	10.2671795	10.397442	10.085247	10.204417	10.429515
"A_23_P117955"	12.462251	12.901928	12.53208	12.580628	12.945299	12.491421	13.051054	12.772416	12.96915	12.607926
"A_23_P117971"	14.672281	14.3461	14.511873	14.209435	14.57354	14.134309	13.904976	14.515767	14.719108	14.382851
"A_23_P117980"	8.2868805	8.543281	8.397011	8.407643	8.229462	8.529931	8.578743	7.453456	7.000027	6.990028
"A_23_P117992"	9.072639	5.7059746	8.90207	10.39376	5.789504	3.2300777	4.9712944	6.701019	8.109595	7.733931
"A_23_P118"	7.8705096	7.9313164	8.030422	8.14419	7.91889	8.026101	7.2974567	7.8032136	7.607043	7.9709544
"A_23_P11800"	14.6471405	14.822923	14.588817	14.449758	13.927819	13.75186	13.336503	13.148632	13.25542	13.231788
"A_23_P118002"	13.004928	13.057489	13.05411	12.864685	13.325478	13.426104	13.298286	12.309365	12.352701	12.40334
"A_23_P118018"	3.091202	3.1887658	1.8713073	2.0147705	3.7252955	2.9179287	3.6454687	2.3389623	2.4772346	2.2448084
"A_23_P118025"	6.811251	5.592402	4.889603	4.9939857	7.3555536	6.065397	7.2334914	5.7540293	6.1692944	5.4465976
"A_23_P118038"	10.453476	10.585439	10.611415	10.370997	10.421646	10.462622	10.622747	9.862684	10.228858	10.249523
"A_23_P118042"	6.105231	6.2063265	7.054183	4.846226	6.460432	7.826855	7.3343797	8.007988	9.861813	8.19714
"A_23_P11806"	6.87869	3.9077108	5.205324	4.670066	13.205004	13.68909	12.749471	8.742873	8.930383	8.18087
"A_23_P118061"	9.842407	9.743914	9.940849	9.309619	9.811752	9.642008	10.054153	9.697711	9.126487	9.429022
"A_23_P118065"	6.314921	4.6374288	5.439872	4.823492	6.131547	2.6649597	2.971811	6.18004	5.9501286	6.45094
"A_23_P118086"	12.70786	13.015523	12.234824	12.646231	12.393223	12.413342	12.504403	13.438866	13.12027	13.058464
"A_23_P118095"	5.9192734	5.868616	5.995529	6.041628	5.8272676	6.0777526	6.007539	6.1410217	6.331714	6.235233
"A_23_P118105"	13.415732	13.197105	13.46589	12.888418	13.77712	13.56924	13.617006	12.855491	13.147125	13.043529
"A_23_P118113"	3.331071	3.8476584	3.9598176	5.967574	4.275208	4.4204407	4.3178678	3.448154	2.9555829	3.8622904
"A_23_P118122"	13.695642	12.483887	13.785275	11.443877	13.349785	13.168724	13.151412	12.449693	13.168082	13.2971115
"A_23_P118135"	8.335935	8.188193	8.188918	8.150318	8.073037	8.343193	7.5898566	7.8472495	7.76362	7.71594
"A_23_P118150"	10.388771	10.681321	10.783108	10.54854	9.695392	9.984077	9.717634	9.58787	8.992244	10.110497
"A_23_P118158"	9.285084	2.1377418	5.091002	5.957101	6.7975335	4.4299436	7.642163	3.1077576	1.6361517	1.6981368
"A_23_P118174"	5.5982995	5.8338203	6.0207887	5.8324943	5.563024	5.735885	5.6639853	4.621902	5.0307636	4.196731
"A_23_P118185"	10.877699	10.941152	10.821735	10.722415	10.987708	11.173323	11.031141	10.877363	10.393291	10.691272
"A_23_P118195"	3.8500607	3.512479	3.7397006	3.9215207	3.5256631	4.9750347	4.5654583	3.3476858	4.5268087	3.598248
"A_23_P118203"	10.778742	9.094561	11.098982	6.655655	6.284919	3.5630636	4.804019	7.9500823	5.641342	10.562018
"A_23_P118234"	1.6664916	5.669574	1.6770221	4.80697	6.9392285	5.5656223	7.423903	3.152684	4.021131	4.206636
"A_23_P118246"	7.3762975	9.8786745	7.6290655	7.5478053	7.9648695	8.259701	8.922802	6.3301296	6.828647	6.9141316
"A_23_P118254"	3.805818	4.0388894	3.6358025	4.0347667	5.1822186	4.018408	4.0392876	4.2272344	3.9768286	4.2465024
"A_23_P118266"	13.127806	12.623659	12.764153	13.090448	13.016349	13.045759	13.213135	13.357472	13.018722	13.56924
"A_23_P118289"	9.417306	9.368707	9.336276	9.017046	9.02323	9.062829	9.353	9.057094	9.025052	9.420521
"A_23_P118300"	8.774156	8.839269	9.405631	8.84383	7.833602	9.395507	9.577323	9.079755	9.219843	9.506168
"A_23_P118306"	12.096743	12.108871	12.260216	12.002426	12.057575	12.305376	12.186355	12.248054	11.510186	11.926467
"A_23_P118313"	15.307226	15.586306	15.684094	15.384829	15.474899	15.539035	15.749599	14.863461	14.642082	14.989991
"A_23_P118327"	10.784552	10.934882	10.718305	10.945334	10.297677	10.506688	9.892248	10.468461	10.199353	10.545041
"A_23_P118334"	8.250774	8.370911	8.326859	8.50666	7.9129753	8.048318	7.942993	8.40077	8.198868	8.211689
"A_23_P118353"	9.830496	9.768885	9.80281	9.686296	9.43796	9.832949	9.881433	9.571779	8.669054	9.393574
"A_23_P118370"	6.768019	6.6168966	6.8874154	6.3937073	7.073565	8.024264	8.227819	6.4880385	6.328721	6.6546087
"A_23_P118392"	12.432447	12.739302	11.725068	9.707081	14.739947	18.041716	17.893875	13.56924	15.842134	16.216969
"A_23_P118406"	9.2276945	8.958479	8.78826	8.906049	9.145516	9.062427	9.291534	8.704502	8.63344	8.703068
"A_23_P11841"	6.486895	6.747103	4.8552284	6.111989	5.394872	6.4470205	5.748692	5.7646184	5.803092	5.8368425
"A_23_P118412"	9.058319	9.134852	9.074232	8.869318	8.323899	9.1548605	8.604704	9.236374	9.150295	9.194401
"A_23_P118427"	8.237421	9.063465	8.381639	8.670722	9.220619	8.36841	8.315655	8.357346	9.280688	9.068369
"A_23_P11843"	12.8275175	12.439711	12.506546	12.292906	12.4774	12.759982	12.930627	11.320018	11.708646	12.039827
"A_23_P118435"	13.244917	13.369094	13.264583	13.240232	13.133924	13.292341	13.278039	13.0130415	13.2668	13.226034
"A_23_P118451"	10.027178	9.384567	10.207863	8.999314	8.943533	10.007114	9.655195	8.925641	8.500389	8.668873
"A_23_P118462"	13.403736	13.731705	13.321939	14.00584	14.118769	14.149793	14.205756	13.850369	13.7790165	13.611266
"A_23_P118493"	10.291306	11.006773	10.457473	10.442922	10.812773	10.858342	10.991824	9.574563	9.511339	9.8959255
"A_23_P118516"	10.760076	11.198483	10.871379	11.207758	10.893889	11.297564	11.042709	11.486158	10.746252	11.219453
"A_23_P118536"	4.1497545	1.7992404	3.3673398	2.9957442	4.7871222	2.1721535	2.6127307	4.3468857	3.092261	3.7415094
"A_23_P118544"	14.433383	14.581666	14.821234	14.576068	14.581666	14.71247	15.012131	14.584613	14.491589	14.51884
"A_23_P118552"	10.949468	10.767472	11.058734	11.263716	10.750898	10.171971	9.939041	11.361064	11.257045	11.32908
"A_23_P118571"	2.7212107	5.5519176	2.5729368	1.6214445	2.3757696	3.2792234	2.6191626	4.5644894	2.835014	3.4651473
"A_23_P118581"	5.815854	6.227389	5.7667017	5.8664846	5.6735654	5.7121997	6.086588	5.809075	6.6501646	6.0322313
"A_23_P11859"	9.45516	9.497433	9.651161	9.62707	9.64298	9.191357	9.339517	9.213802	8.726909	8.953737
"A_23_P1186"	1.6662438	1.6415426	1.7360734	1.8093371	1.7124884	1.7658004	1.7238734	1.7154294	1.6789558	1.723226
"A_23_P118607"	10.24038	10.197835	10.527136	10.035696	10.293259	10.549983	10.275733	10.231245	10.37216	10.332266
"A_23_P118615"	5.3673034	4.2489705	5.5559297	1.5829089	5.843411	3.476408	3.3103795	8.253795	4.6105967	6.173889
"A_23_P11862"	7.849278	8.053651	7.6163774	8.106431	8.26541	7.9864864	8.4094515	7.981711	7.9621406	7.419933
"A_23_P118633"	11.542715	11.706171	11.59191	11.338823	10.252691	9.339762	10.640879	10.464487	10.745046	10.760076
"A_23_P118643"	10.707879	10.48469	10.747771	10.681974	10.505477	10.490713	10.500493	10.583218	10.127911	10.690199
"A_23_P118649"	9.343584	9.301373	9.609861	9.586788	9.202039	9.328442	9.337958	9.325945	9.628764	9.634244
"A_23_P118660"	8.451678	8.0386505	8.442134	8.23808	8.276552	8.367825	7.6326976	8.002504	8.053651	8.128541
"A_23_P118675"	2.0715191	2.1649978	1.6401455	1.7105438	1.5930896	1.9160727	1.6495681	1.700762	2.0161932	1.644731
"A_23_P118690"	10.912847	11.302086	11.083485	11.355983	11.062546	10.8748	11.021771	10.809785	10.4543915	10.812447
"A_23_P118693"	5.058033	5.357356	5.0162077	5.1111073	5.069813	5.3859677	4.8392267	4.7118955	4.8547006	4.957326
"A_23_P118705"	11.51481	11.644419	11.423476	11.260158	11.846965	11.90974	11.771797	11.665085	11.810885	11.886819
"A_23_P118712"	5.3447204	6.0543604	5.822658	5.6951	6.3383923	6.820319	7.095479	5.497056	5.294977	5.2065487
"A_23_P118722"	8.344779	7.3426933	8.117601	9.162436	8.159838	7.942993	7.903319	6.9402733	8.281419	7.3617945
"A_23_P11874"	8.388323	8.603743	8.029512	8.622836	8.185681	8.018424	8.505397	9.686828	8.704839	8.9516945
"A_23_P118741"	6.151218	5.4282317	5.9689665	6.0561843	5.182444	4.743784	4.528263	4.9531302	5.337366	5.619152
"A_23_P118749"	11.09048	11.520251	10.820065	11.30069	11.59223	11.802161	12.334608	11.473783	11.250222	11.558514
"A_23_P118774"	12.182943	12.4244795	12.603602	12.277369	12.324921	12.5786085	12.898683	12.161263	12.214072	12.079907
"A_23_P118791"	9.045219	9.328192	9.110674	9.102192	8.942407	9.306497	9.367411	8.9159155	9.075489	8.9989395
"A_23_P118815"	6.7772994	7.786064	7.0111346	7.019111	7.3064723	6.458535	9.148654	5.200068	4.9782724	5.843411
"A_23_P118834"	4.492107	5.724187	4.7218947	4.860894	5.1895595	3.8165581	7.0428834	1.6168375	1.576383	2.434116
"A_23_P118842"	1.7173929	1.7039409	1.8199766	2.003905	1.7852482	1.8764001	1.8359611	1.7731266	1.7348635	1.798264
"A_23_P118854"	1.6779581	1.7304047	1.8243107	2.0803866	1.7536104	1.8807433	1.8749138	1.7578745	1.7109227	1.7497431
"A_23_P118888"	9.949974	10.4047575	10.003496	10.1476345	10.373824	10.399014	10.973896	10.614867	10.150788	10.41985
"A_23_P118894"	9.465243	11.282889	8.708781	10.593503	11.750668	14.377924	12.884464	9.750505	9.522588	10.76157
"A_23_P118909"	9.7202635	10.286103	9.934525	10.0583105	9.996777	10.196395	9.584934	9.799462	9.8289175	9.902154
"A_23_P118916"	11.20549	11.60375	11.27155	11.025829	11.504363	11.640258	11.682422	10.92204	10.390929	10.454736
"A_23_P118946"	4.877836	5.68401	5.7763014	5.459279	6.0495477	5.792555	5.707288	5.47007	6.7774553	5.9377756
"A_23_P118967"	4.8392267	2.5821717	3.4799998	1.7918065	3.4427977	3.3219335	1.7111961	2.3675969	3.4356315	2.923086
"A_23_P119006"	8.011111	5.284504	7.6075425	7.5136366	5.6487494	4.9376144	4.950576	8.277518	6.8294086	7.7437243
"A_23_P119015"	3.4864655	2.4756289	2.8915558	2.1042483	2.520799	1.9901166	1.8464143	2.2249584	2.8073685	3.1628206
"A_23_P11902"	6.1922903	6.7852	6.400047	6.2858896	6.595044	6.877721	6.6481137	6.21195	6.4514194	5.838183
"A_23_P119023"	10.218691	10.494332	10.320584	10.585439	9.928728	9.434303	9.576102	9.719425	10.126653	9.701686
"A_23_P119040"	5.1443605	4.9588766	3.2902775	3.2889526	3.7269967	3.7190144	2.720874	6.035156	6.772008	7.0029497
"A_23_P119042"	8.3167	7.065542	7.122078	6.871758	9.280102	6.485103	9.451632	7.2939787	7.835865	8.084359
"A_23_P119084"	6.746955	6.880514	7.113661	6.3711767	6.7427697	7.2159333	6.6258807	6.1941786	5.67867	6.324552
"A_23_P119095"	7.9481497	6.236616	7.1469846	7.146545	8.863806	9.655195	9.7157	10.921758	10.76902	12.009384
"A_23_P119102"	9.00045	8.273968	8.822959	8.616165	9.494076	8.730196	9.665928	9.286308	9.673106	9.428922
"A_23_P119130"	14.449758	14.322008	14.409856	14.401899	14.688096	14.087449	14.409856	15.035091	15.043257	14.954614
"A_23_P119141"	10.494695	10.443429	10.525701	10.307021	10.926738	10.712609	11.132168	10.461197	10.55346	10.544817
"A_23_P119143"	4.988494	5.6712303	5.2691884	5.439872	5.294743	5.4676156	5.435753	5.232526	5.584849	4.846577
"A_23_P11915"	7.091151	7.0323777	6.746784	6.5428376	6.4350677	6.698414	5.915745	6.750085	7.137996	6.819019
"A_23_P119152"	1.5611327	3.0220544	1.6429334	2.8099818	1.5973648	2.2379339	4.0971813	2.3463326	1.5581971	1.5762625
"A_23_P119168"	5.431755	5.378086	5.3868375	5.1659555	4.8626184	5.602947	4.754226	5.0273643	5.6825013	5.532169
"A_23_P119196"	11.040109	9.322404	9.539131	8.240389	11.990704	9.023134	10.735181	11.816006	11.210613	10.964877
"A_23_P119202"	3.3287382	2.9179287	1.6032354	1.630276	3.8394566	5.5265155	4.9986806	1.6212493	2.307441	1.6051642
"A_23_P119214"	8.77118	9.034068	8.786803	8.613541	8.714823	9.174869	9.132487	8.720055	8.364281	8.791916
"A_23_P11922"	10.74476	10.283151	10.87089	9.666157	9.865963	9.844191	9.398918	9.730819	9.842975	10.034695
"A_23_P119222"	1.6136494	4.8935943	4.119918	1.6662438	1.6549544	3.4805136	5.70305	4.23201	3.4844234	3.1431844
"A_23_P119254"	5.7329497	7.672323	6.4812627	6.4227605	6.1081505	6.397521	7.0244775	6.153181	5.3802066	5.9031725
"A_23_P11926"	8.753588	8.598819	8.977206	7.9664836	7.639763	7.438719	7.057998	7.8470116	7.7094088	8.092143
"A_23_P119266"	9.201111	9.729562	9.578253	9.629955	9.667575	10.02159	9.604586	9.526219	8.890143	9.269255
"A_23_P119295"	11.089193	10.8818245	10.940677	10.657869	11.233378	11.411096	11.399308	10.64852	10.948401	10.760384
"A_23_P119311"	8.8935795	8.924822	8.132305	8.614321	8.17628	8.309915	8.4413185	8.26541	8.5114355	8.310696
"A_23_P119322"	7.7886024	6.057706	7.2284975	5.1421723	6.6671276	6.9041076	7.7370677	5.869281	6.5763397	6.449969
"A_23_P119337"	8.23808	7.214762	8.248982	7.6446443	7.5508547	9.02529	7.8148603	7.101964	7.036693	7.1418095
"A_23_P119344"	4.526201	3.693436	4.256107	3.7573	4.5195484	4.2824965	3.1195705	4.5907607	4.0725245	3.869183
"A_23_P119353"	10.907417	9.220013	11.129987	10.944006	11.121663	8.5762	9.604906	11.30069	10.466921	10.723135
"A_23_P11936"	8.11075	7.0743093	7.537407	7.2516127	6.7056437	7.926706	7.1246605	7.761526	7.899338	7.3406906
"A_23_P119362"	8.737336	7.990202	8.352826	7.8890853	9.5637	8.8198185	8.9822645	8.954517	8.264786	7.8148603
"A_23_P119377"	10.0443	10.038925	9.960088	10.126653	10.257786	10.375097	10.163095	9.355135	8.737587	9.410088
"A_23_P119390"	4.6806126	3.8473988	4.7849483	4.3565936	4.9647074	4.551243	2.8978128	4.6033764	4.2009573	3.8109949
"A_23_P119395"	10.47892	9.716568	10.197009	10.008652	9.830496	9.992874	10.338601	10.843202	11.510759	11.190687
"A_23_P119407"	9.06673	9.266171	9.131607	9.13624	8.905789	8.945205	8.97229	9.204836	9.565876	9.174869
"A_23_P119418"	10.152929	9.974866	9.665329	9.694054	9.508694	9.924855	10.472818	10.030773	10.692041	10.349551
"A_23_P119448"	4.7229457	5.694339	5.7362885	6.4767103	8.271522	4.989401	5.8429666	4.2056684	5.184092	4.688188
"A_23_P119458"	3.3832898	2.7007189	2.131527	1.6847273	2.686992	3.7010293	4.0355587	4.6489973	4.160843	4.1688414
"A_23_P119464"	5.975859	4.739805	6.4876647	6.448075	5.385153	6.227898	5.1406198	6.115627	6.656728	6.7936163
"A_23_P119478"	7.197478	6.913349	6.6324987	5.3109894	7.5946	8.12208	8.238526	6.325524	5.74011	6.2604575
"A_23_P119500"	3.8391132	3.3801036	4.048485	5.5133457	3.6664712	3.246553	2.9339554	4.476081	2.5250044	4.0408006
"A_23_P119502"	7.691577	7.2721777	7.039471	6.9324074	9.062829	6.995987	9.768885	6.8564706	7.060444	6.459422
"A_23_P119526"	10.539123	10.511438	10.740811	10.333226	10.779052	10.921758	11.166443	10.417186	9.613057	10.338601
"A_23_P119535"	5.2505	5.1895595	4.9817414	5.00258	5.184092	5.0446677	5.248182	4.727264	5.1764016	4.6123915
"A_23_P119543"	7.9784913	6.4669275	7.543156	6.703303	8.497324	8.280029	8.568271	7.6636586	7.7939763	7.59068
"A_23_P119562"	11.838362	8.23042	9.588968	8.992043	12.289635	10.491418	9.942144	10.669228	10.796775	10.412748
"A_23_P119573"	4.729122	6.0636196	5.0238795	2.5491867	5.551722	6.45094	5.3051395	3.5138378	3.9502246	4.5684605
"A_23_P119583"	13.537145	13.238916	13.431052	13.199871	13.243258	12.766119	12.568846	13.6463	13.761595	13.482906
"A_23_P119593"	11.26247	10.597753	10.322211	10.287113	10.315752	10.105683	10.130234	10.952099	11.433513	11.430183
"A_23_P119611"	4.26732	3.8403986	3.8503687	3.728132	4.977561	4.2654977	4.0807676	3.8924627	4.3002515	4.368162
"A_23_P119617"	10.182378	10.264278	10.443429	10.367826	10.415298	10.563233	10.14606	9.982479	10.265902	9.921292
"A_23_P119627"	14.266821	14.565687	14.654628	14.422367	14.442686	14.559146	14.791325	13.946176	14.211462	14.183383
"A_23_P119634"	4.168057	3.5230556	4.8663473	4.007236	4.3996077	4.4000134	3.803712	4.092755	4.293051	4.0545096
"A_23_P119677"	10.164583	10.103765	10.08461	9.996777	10.129364	9.976025	9.866198	9.917679	10.423585	10.017257
"A_23_P11968"	4.403313	4.4563246	4.431006	4.94571	4.2636156	4.66123	4.7305093	3.927048	4.2586455	4.8050857
"A_23_P119683"	10.61885	10.416909	10.306051	10.4023075	10.304025	10.363826	10.691052	10.415668	10.2563305	10.016112
"A_23_P119698"	10.544485	11.581158	10.990775	11.224125	10.624781	10.437057	11.699709	10.685665	10.947296	10.951403
"A_23_P119714"	11.429373	11.631708	11.576901	11.620439	11.67361	11.725601	11.262056	10.877699	11.1185665	10.998514
"A_23_P119732"	1.7016407	2.07434	1.5334129	1.5507824	1.5222564	1.5350193	1.5352155	1.5273974	1.5264964	1.5160029
"A_23_P119735"	4.079364	4.264545	4.8219857	4.2915936	4.513903	4.2458725	4.3077736	4.72577	6.1622562	5.256536
"A_23_P119753"	7.4791284	7.7901278	7.636662	7.7628837	7.6751795	7.812052	7.5482697	7.509783	7.251258	7.28485
"A_23_P119763"	2.3881252	3.9226348	2.9841096	2.9043577	2.4194336	3.428586	2.1031933	3.4181006	4.544373	5.436264
"A_23_P119778"	6.2320833	6.2574835	7.114151	6.6597333	6.461369	6.7063794	6.041848	6.6151104	5.8632007	6.627809
"A_23_P119789"	7.901247	8.243431	7.405219	7.9497576	7.3971515	7.2280436	7.3643417	7.545556	7.3242946	7.546554
"A_23_P119794"	10.638351	9.801137	10.619304	10.343908	10.352182	10.216047	10.481832	10.5259	10.613718	10.736732
"A_23_P11980"	4.9139304	3.99911	3.2829437	5.694665	4.1362066	3.8125927	4.208246	6.4289265	6.6096387	6.1408677
"A_23_P119812"	9.293125	9.204836	8.948364	9.289649	8.656856	8.782958	9.427719	8.309371	8.9125805	8.656404
"A_23_P119835"	6.10614	5.0895925	4.1960754	2.98603	6.827462	5.7253118	6.255839	4.2808204	4.9233637	4.453428
"A_23_P11984"	4.567672	3.1213527	3.2374842	4.237124	4.6117725	3.713467	2.2835774	2.3297446	2.1168923	3.4298754
"A_23_P119850"	3.466706	3.6693144	3.3759174	4.171603	3.6851647	4.0609193	3.963318	3.743193	3.3436017	3.3785057
"A_23_P119857"	10.359666	9.95819	10.709504	10.9697	9.253317	10.2849865	11.064085	10.681024	10.591055	10.524755
"A_23_P119886"	2.4938438	2.5877936	1.6589227	1.7739025	2.2247193	3.232318	1.7009149	3.0882735	2.9369636	2.3424478
"A_23_P119899"	6.4246764	3.9915164	4.4805717	4.315754	7.3640323	7.5690317	6.5642347	7.2885456	6.5244718	6.814997
"A_23_P1199"	11.150042	10.990991	11.381015	11.139602	11.304246	11.45447	11.515069	11.874228	11.508728	11.852571
"A_23_P119907"	9.182249	8.929623	9.263679	9.178318	9.088863	9.561615	9.199871	9.02529	9.02323	8.6638565
"A_23_P119916"	8.1273365	9.780889	9.708884	9.13648	7.896254	7.4802856	6.4043374	9.412165	9.283957	8.549297
"A_23_P119923"	11.430987	11.260656	11.660756	11.428342	11.762465	11.129101	12.225153	11.0462475	11.646785	11.498379
"A_23_P119936"	3.6092165	3.3691757	3.7995086	2.9707377	3.3054013	3.0751529	2.7658734	2.8511722	2.018069	2.2957697
"A_23_P119943"	11.57991	9.568941	10.849458	10.782132	10.991281	8.000786	9.602838	12.529002	11.918922	12.346283
"A_23_P11995"	12.851376	13.398158	13.11194	13.996793	13.240232	12.24281	13.218103	13.467241	13.528883	13.721787
"A_23_P119964"	10.419419	10.399839	10.334081	10.3276825	10.286911	10.525293	10.351095	10.329464	10.732431	10.629861
"A_23_P119992"	9.176891	9.680137	9.543594	9.13058	9.763859	9.934525	10.561214	9.482669	9.686828	9.337081
"A_23_P120002"	8.585077	9.049359	7.828972	8.189322	8.631118	6.9109282	8.050224	9.135756	8.698412	8.612908
"A_23_P120048"	9.844877	9.593242	10.0590515	9.857325	10.000065	10.098523	9.899205	9.797655	9.84546	9.804715
"A_23_P120056"	8.745057	8.001724	8.784363	8.228466	8.063429	8.374633	7.3124266	8.570812	8.775456	8.972565
"A_23_P120062"	9.603011	9.036627	9.661497	9.529425	9.402989	9.195204	9.477832	9.479319	9.701923	9.26668
"A_23_P12010"	10.754636	11.028541	10.662878	10.703822	10.461197	10.33474	10.281854	10.0413685	10.479162	9.991911
"A_23_P120103"	8.044051	5.2796793	7.0447636	7.373158	6.0904775	5.3630476	5.59126	6.8964634	6.590327	6.3479395
"A_23_P120125"	9.955772	7.808372	11.948716	9.573375	8.47516	6.577062	7.027608	11.184658	10.078107	9.545996
"A_23_P120146"	9.674852	9.937902	9.812149	9.602591	9.168122	8.946283	9.007491	9.150295	9.120165	9.241542
"A_23_P120153"	11.914587	11.315439	11.512016	11.419767	11.77559	11.6958885	11.945557	11.72141	11.682863	11.774002
"A_23_P120170"	8.078348	7.5714064	7.881237	7.918164	7.98516	8.4678135	7.8511744	7.8737254	8.142941	7.843178
"A_23_P12018"	8.689709	9.672545	9.105591	8.914915	8.338186	9.048225	8.111509	9.13198	10.14579	9.559666
"A_23_P120182"	10.334081	10.318261	10.471552	10.210731	10.593503	10.97282	10.711438	9.90337	9.757913	10.036438
"A_23_P120194"	12.448196	12.836903	13.077991	13.220496	12.637215	12.695849	12.822494	12.838473	12.485076	12.523419
"A_23_P120227"	7.7586207	6.2986836	7.356877	8.219706	9.5377865	8.385071	8.165639	8.421806	8.03747	8.430739
"A_23_P120237"	11.588143	11.493199	11.64821	11.406286	11.50481	11.466884	11.861069	11.781978	11.434729	11.67019
"A_23_P120243"	1.7726716	1.907814	1.8517444	1.9606764	3.404383	2.1259325	1.8882766	1.8275853	1.7441788	1.8336924
"A_23_P120254"	9.220768	8.929449	8.747802	8.931488	9.1241865	8.665405	9.520766	10.057738	10.009254	10.191192
"A_23_P120270"	10.498928	11.436356	10.982183	11.953461	10.063925	10.841053	10.913152	11.4081335	11.442161	11.470788
"A_23_P120281"	1.5504799	1.5576792	1.5536869	1.5717751	1.5334675	1.5435688	1.5597926	1.5912658	1.5597926	1.5713589
"A_23_P120316"	8.797443	9.126345	8.75675	10.052677	10.71182	11.256315	10.484545	10.007341	9.347564	10.237797
"A_23_P120325"	10.882152	10.110771	10.866221	10.613434	10.381903	11.454747	10.655519	10.601693	10.708256	10.6286125
"A_23_P120335"	11.344893	11.848328	11.836391	11.696947	11.743794	11.7455	11.764254	11.385415	11.280382	11.43279
"A_23_P120345"	8.543029	7.9251623	7.5923834	7.310933	8.974415	8.268576	9.22944	8.846573	8.714619	8.533526
"A_23_P120354"	8.713027	8.378555	8.464129	8.592312	8.751369	8.436936	7.222916	8.5114355	8.089365	8.427078
"A_23_P120364"	14.922519	14.971572	15.0781765	14.253417	14.584613	14.78391	14.779451	14.595324	14.98238	14.741358
"A_23_P120378"	3.0790339	2.3058267	3.0156288	3.10121	1.8582937	2.0986874	2.226619	2.2448084	2.333824	2.4467998
"A_23_P120414"	13.835064	14.002258	14.114737	13.925943	13.668916	13.472124	13.412064	12.85892	13.2971115	13.096461
"A_23_P120428"	3.6591341	4.0968704	3.8366723	3.7046216	3.0511346	3.5609362	3.5141907	3.346523	3.8543682	3.851083
"A_23_P120435"	7.672049	7.5105906	7.1095915	7.5457845	7.3260016	7.400186	7.5421	7.518297	8.231565	7.391197
"A_23_P12044"	9.688517	8.918856	9.961861	9.060252	9.674852	8.0428095	8.259213	9.844877	10.863409	11.307862
"A_23_P120442"	9.116113	8.709835	8.866361	8.502733	8.150547	8.079586	8.199117	7.7732077	7.097575	8.0692835
"A_23_P120458"	10.663074	10.304161	10.331115	9.735392	9.9460745	10.112427	10.1581	9.15453	9.324967	9.411636
"A_23_P120467"	7.795338	8.405204	7.9427676	9.123428	7.663142	7.9404216	8.036779	8.699869	8.826939	8.794581
"A_23_P120472"	3.7488828	3.239487	3.4980698	6.0824623	6.4767103	3.7521994	2.9117308	4.3181233	3.9595096	4.1805124
"A_23_P120488"	11.190143	11.604918	11.219453	11.865632	11.2909975	11.065644	11.249517	11.644082	11.6165	11.345796
"A_23_P120504"	10.719049	10.710163	10.610819	10.59542	8.494628	8.588528	8.932509	9.1551075	8.510834	9.133526
"A_23_P120513"	10.745683	11.055392	10.498928	10.870348	10.393291	10.562018	10.559828	12.082795	11.487124	11.485501
"A_23_P12053"	9.530754	9.303748	9.492945	9.442594	9.306277	9.056443	9.19699	9.302793	8.743641	9.126828
"A_23_P120545"	1.6336406	1.6501138	1.744439	1.8793719	1.6988012	1.7656118	1.7765523	1.6859212	1.6450543	1.6888261
"A_23_P120557"	8.8702755	8.735246	9.332848	9.240275	9.535004	9.571175	9.424124	9.490172	8.658909	9.091368
"A_23_P120566"	10.174589	9.338879	9.228688	9.80672	10.9697	10.13771	9.685114	11.476888	11.84281	11.661231
"A_23_P120572"	5.8531084	6.090955	4.7406254	6.223411	5.5511518	5.088304	5.2310224	7.7847342	6.8064647	6.7690015
"A_23_P120588"	1.6349933	1.6380814	1.6930901	1.7794145	1.6476873	3.1801465	1.7032759	1.6964748	1.777119	1.6941969
"A_23_P120594"	8.918035	8.592466	7.9313164	7.7920303	8.299076	6.516701	7.3958035	9.353788	9.2852	9.416526
"A_23_P1206"	15.556536	15.611746	15.588872	15.666633	15.166406	15.654559	15.418897	15.74497	15.853828	15.679658
"A_23_P120606"	8.064262	7.825892	8.321045	7.846556	8.112637	8.656404	8.262935	7.5514026	7.953928	7.655958
"A_23_P12062"	10.441095	10.59731	10.844107	10.6821375	10.085247	10.558701	10.05441	10.561214	11.028182	10.918377
"A_23_P120629"	3.5517337	4.2735176	4.1177754	3.784137	5.5965643	4.182599	3.9883235	3.0407705	3.3825884	3.7144444
"A_23_P120644"	9.794943	10.560036	10.437258	10.45887	10.217879	10.12332	10.1204405	10.3276825	10.056341	10.522958
"A_23_P120660"	16.482094	15.736485	16.487091	15.977284	16.233225	16.449585	16.238667	16.74066	16.562864	16.590853
"A_23_P120667"	9.157971	7.8175106	8.46225	8.372679	10.534605	7.947819	7.7103496	11.060648	8.922051	9.554226
"A_23_P120694"	4.643718	4.493508	5.7180233	4.775746	4.6948714	2.936493	1.770113	3.8885188	5.128078	3.161155
"A_23_P120710"	12.003395	12.714213	12.454667	12.658595	12.254244	12.230797	12.13597	12.668398	12.332715	12.365945
"A_23_P120744"	10.788471	10.620539	10.6531725	10.8343315	10.8033905	11.011194	11.000937	10.714255	10.626496	10.365429
"A_23_P120776"	10.727989	11.303663	10.846289	10.77517	11.229428	11.659794	11.616016	10.313723	10.386858	10.2172
"A_23_P120784"	6.8458757	7.162752	7.0886188	6.8852534	6.9405847	7.3622947	7.179919	6.460306	6.7045174	6.356434
"A_23_P12079"	8.003022	8.906464	7.7033935	8.309915	6.9245315	6.9726715	7.136508	6.4402328	7.1603365	6.9302464
"A_23_P120794"	9.224123	10.335113	10.069393	9.703141	10.843829	11.804024	11.72141	9.768885	10.111079	10.308447
"A_23_P120809"	7.8377438	7.4151573	7.3999343	7.607357	7.3426933	7.4311996	7.5050535	7.8195634	8.11181	7.438015
"A_23_P120812"	6.722897	5.7667017	5.5935836	5.2848682	6.1965256	6.749463	6.955282	6.420354	6.314159	6.600813
"A_23_P12082"	7.534568	1.563768	7.3510504	2.6220515	3.7983222	1.59379	2.9428105	4.4236093	1.541762	1.815506
"A_23_P120822"	6.319588	5.4472117	6.2266273	5.514877	5.610555	6.3124967	5.759784	5.7512174	5.468554	5.148539
"A_23_P120839"	9.549135	9.515812	9.576495	9.4849825	8.975317	9.314233	9.62707	9.069907	8.861056	8.982944
"A_23_P120845"	13.924521	13.253832	13.331789	13.803509	13.746693	14.130813	13.667859	14.435916	14.034083	14.200865
"A_23_P120860"	10.409088	10.339191	10.464191	10.189482	9.519154	10.194289	9.913933	9.952579	10.124256	10.35418
"A_23_P120863"	9.550988	10.19382	9.800521	10.195099	6.757341	8.825135	8.648402	5.1646514	6.7445245	7.558242
"A_23_P120883"	12.290762	9.477067	8.402549	11.717079	11.348736	10.646258	10.949468	9.051555	7.664201	7.757456
"A_23_P120899"	5.670456	5.5265155	5.368115	5.309237	5.9028	5.8164268	5.8787527	5.3030443	5.7253118	5.427679
"A_23_P120902"	9.176147	8.614778	9.015496	11.690527	8.67037	4.302052	8.623062	4.546473	4.8912635	4.343708
"A_23_P120915"	11.056535	10.92446	11.048547	10.610595	10.822043	10.773291	10.596712	10.872812	10.909912	10.600004
"A_23_P120921"	8.987043	8.926174	9.026299	8.623252	8.845624	8.864095	8.668873	8.6635065	8.645148	8.484892
"A_23_P120931"	6.711198	5.5011463	5.6062427	4.856182	6.701911	4.923605	5.80864	6.6805243	6.345134	6.7159524
"A_23_P120933"	14.538796	13.824172	14.525621	14.205756	15.329968	15.065354	14.631501	15.101345	15.217907	14.91647
"A_23_P120941"	11.737791	11.169098	11.645491	11.439119	12.393778	12.196057	11.60335	12.325782	12.037478	12.099611
"A_23_P120942"	15.529499	15.696642	15.704642	15.563939	15.572743	15.549844	15.788651	15.296517	15.44126	15.2265005
"A_23_P120947"	12.348826	12.592064	12.57161	12.4236765	12.340245	12.394966	12.416391	11.942683	11.172099	11.9302845
"A_23_P120953"	7.4120626	5.669854	7.0205755	4.9376144	7.1089253	6.1408677	6.0230927	7.2894926	8.007417	7.0629444
"A_23_P120970"	8.973715	8.492452	8.858572	8.504267	8.204701	8.403385	8.6286545	8.0157175	8.5446005	8.36841
"A_23_P120973"	8.024906	7.2983346	7.7627325	10.649681	7.7444406	7.635188	10.564727	10.60598	7.9640527	8.308157
"A_23_P120982"	4.4778214	3.3283763	4.520396	4.335282	3.4876616	4.451668	2.4278736	4.9244313	5.080435	4.6085405
"A_23_P121"	5.44802	5.82447	5.3099504	6.2641764	5.685381	6.283145	6.1239996	4.935128	5.2350793	5.517061
"A_23_P121011"	7.6749153	8.203416	7.701559	7.258595	9.282423	9.868433	10.17619	8.570047	7.885414	8.570047
"A_23_P121013"	3.3366618	4.667656	4.08553	3.82218	3.7065217	3.8536239	3.9833858	3.823462	4.2039013	5.708387
"A_23_P121030"	6.5475974	6.59937	6.6032653	6.5521965	6.067392	6.8100395	6.127931	6.505769	7.250825	6.803833
"A_23_P121037"	8.800636	9.183211	8.972825	8.823871	8.442569	8.984836	8.983198	7.7824965	7.746161	8.144704
"A_23_P121051"	8.170939	8.442134	8.444217	8.029269	9.007915	9.188692	9.597117	7.036693	6.2646704	7.259858
"A_23_P121061"	4.685712	5.095476	5.8743486	7.7837467	3.3650627	2.8240345	5.71625	3.94264	5.9920554	5.4610596
"A_23_P121064"	5.924947	5.67973	6.4721465	5.538991	6.9439087	4.108487	4.66705	7.049856	7.9819465	8.594029
"A_23_P121082"	10.650829	11.028182	11.658358	12.337325	12.206687	12.459619	12.138157	11.641238	11.684106	11.597468
"A_23_P121095"	13.207454	13.13688	13.052734	13.120933	12.713477	12.4642725	12.47658	12.92594	12.57161	12.667053
"A_23_P121102"	3.2279408	4.416466	3.5961595	3.7349	3.87473	4.278897	3.321409	4.496626	3.3459651	3.806951
"A_23_P121106"	4.281802	6.1607175	5.628514	6.314322	5.632949	5.9418	5.02362	6.153974	4.882023	5.482793
"A_23_P121120"	3.49215	6.169819	3.4108365	4.6828003	3.3577285	5.58236	6.616413	2.954531	3.7720804	5.0659666
"A_23_P121122"	9.941426	9.933039	10.035228	10.0988865	10.133183	10.1323805	10.146853	10.222691	10.898173	10.551422
"A_23_P12113"	8.816973	8.928454	8.208967	8.745331	8.606669	8.259067	9.206615	9.072639	8.836608	9.487464
"A_23_P121141"	8.5981655	8.607868	8.371277	8.293775	8.486705	8.82343	8.387467	7.9808025	8.088209	8.076776
"A_23_P121144"	1.7196945	1.8995752	1.8542453	2.1071763	1.7887762	1.930521	1.8783126	1.773535	1.7387929	1.8067908
"A_23_P121182"	11.231076	11.159466	11.022167	10.866221	11.42009	11.399892	11.391112	11.070343	11.239339	10.948065
"A_23_P121196"	10.035228	9.524945	9.886704	9.825367	9.660734	10.593004	9.751707	10.139208	9.284858	9.301115
"A_23_P121215"	7.5977974	8.053365	7.9760036	7.108505	7.409906	7.3665833	7.094271	7.401571	7.782811	7.608926
"A_23_P121222"	6.8415613	6.9324074	6.921105	6.6083913	6.5425987	7.150897	7.087707	5.696648	5.171905	5.815854
"A_23_P121234"	6.8395867	4.5374155	5.43658	6.4331465	9.583883	10.69248	10.703822	7.7736073	6.9629736	7.8007545
"A_23_P121250"	15.4118595	15.494557	15.765917	15.390464	15.623279	15.696642	15.081228	15.292405	14.631501	15.159786
"A_23_P121253"	8.43707	8.257364	8.112637	9.232261	9.026299	7.3555536	7.8715706	9.752201	8.961801	8.983994
"A_23_P121265"	8.994167	9.561076	9.170757	8.761442	9.441284	9.426663	9.33207	8.914372	8.416747	8.815396
"A_23_P121276"	9.37569	9.258466	9.2613	9.597699	9.29168	9.351338	8.60864	9.598916	9.268717	9.230486
"A_23_P12128"	13.957723	6.036173	5.93085	6.2613263	5.393355	5.969873	5.969339	12.23782	17.851105	17.893875
"A_23_P121282"	4.833055	4.498108	5.0146594	4.756649	5.1488953	4.825178	4.45719	4.9187484	5.048771	3.9616933
"A_23_P121326"	10.71182	11.224125	10.554805	11.051824	10.613068	10.886303	10.083051	10.203727	10.057985	10.104911
"A_23_P121340"	2.5875113	2.67836	2.891979	2.3410504	1.7706494	3.1399026	2.7048264	2.3699257	2.427611	1.520514
"A_23_P121345"	6.8831596	7.0201097	6.9190273	6.9629736	6.7488465	6.5434856	6.942367	6.6878552	6.4328938	6.5199986
"A_23_P121356"	13.096461	13.804652	13.416382	13.863612	13.226034	13.728442	13.707497	13.267428	13.171836	13.089291
"A_23_P121374"	9.472022	8.023988	8.999935	9.208517	9.060958	7.716631	8.464338	9.074232	8.24202	8.873245
"A_23_P121386"	12.868774	13.166782	12.753129	12.983274	12.753129	12.372485	13.176491	12.819967	12.649393	12.711311
"A_23_P121396"	10.158911	10.672418	10.677451	10.503639	9.739452	9.876417	9.749782	9.408616	9.383718	9.773882
"A_23_P12140"	13.007295	12.913558	13.048567	13.140064	12.513053	12.736965	11.338444	13.059808	11.969437	12.869983
"A_23_P121405"	9.468721	9.740513	9.688263	9.561321	9.408127	9.350782	9.0414095	9.499554	9.396901	9.4383545
"A_23_P121413"	3.3947413	3.1429257	3.5242522	3.078073	3.1176007	3.7344384	2.9707377	2.3639107	3.506324	2.8705232
"A_23_P121423"	6.270522	6.720742	6.098363	6.4794817	3.6491773	3.3787196	3.712623	3.700786	4.5761743	5.14503
"A_23_P121441"	8.167825	8.688633	8.835506	8.800483	1.6752257	3.5351958	5.465783	8.650087	8.311839	8.013623
"A_23_P121447"	4.363396	3.9974518	2.805626	5.5976562	5.38345	5.2235756	5.5719976	5.162618	4.7786045	4.991095
"A_23_P121459"	2.7386427	2.0445092	1.6424481	1.7353594	2.021265	2.6959672	1.7602152	2.32298	2.2325418	1.609109
"A_23_P12147"	6.3555307	6.5086527	6.3323226	6.475169	6.8003387	7.808372	8.340577	6.1185284	5.831958	6.0180354
"A_23_P121480"	12.223545	11.680048	12.389681	11.680281	11.554426	11.367489	6.3821764	11.53171	11.086022	11.526805
"A_23_P121489"	9.197107	9.211051	9.513796	9.288119	8.706843	9.318284	9.357147	9.588079	10.076279	9.6967945
"A_23_P121499"	11.359666	10.4906645	11.461129	11.175733	9.895482	11.8598585	11.035345	12.329309	12.0461445	11.510186
"A_23_P121506"	8.420335	7.986779	8.217467	8.045662	7.963252	8.339414	8.287586	7.954851	7.557022	7.9394484
"A_23_P121527"	8.626728	9.480797	9.060098	8.754158	8.837663	7.5462036	7.32349	9.017376	8.840811	8.835188
"A_23_P121533"	11.905998	9.606133	11.771797	10.914786	11.409329	8.735246	10.987069	12.6325865	12.043907	11.19976
"A_23_P121545"	6.436351	10.399282	11.424981	11.406597	9.000638	12.325782	3.5636787	9.929778	6.591753	7.7956715
"A_23_P12155"	1.8432419	1.6823864	1.5441828	1.577067	1.5227042	2.7878003	1.5523552	2.2375855	2.4592123	1.5221889
"A_23_P121564"	8.083423	8.077602	8.109373	7.808632	6.886388	5.0778084	5.8199267	8.00725	6.1851673	7.6323466
"A_23_P121573"	3.8860714	4.0109797	4.333616	4.720888	3.8979669	4.537707	4.603126	4.4646645	4.3360376	4.6896415
"A_23_P121586"	5.0686975	5.741314	5.331325	5.506285	3.927048	4.344235	4.3028336	4.7447596	4.786065	5.0662365
"A_23_P121596"	6.6315436	7.1350985	5.9509664	7.432905	9.098583	9.434743	10.469762	5.148021	3.1901915	4.076826
"A_23_P121602"	10.295508	10.718088	10.062269	10.79718	10.388771	9.917424	10.234484	10.180354	8.80007	9.50732
"A_23_P121614"	3.6995375	3.75588	3.4790704	3.5941389	3.3358154	3.8772745	3.5579188	3.250255	3.6150525	3.3577285
"A_23_P121622"	1.7163393	1.7681205	1.8915166	2.2018538	1.7961069	2.012792	1.9536386	1.7973418	1.7530572	1.8081298
"A_23_P121637"	1.770565	1.6078957	1.6535909	1.6858089	6.464482	1.7663618	3.5879583	3.775308	3.5529435	4.438444
"A_23_P121646"	5.44599	5.5897093	4.7956095	5.008867	4.9130096	5.342045	5.351717	4.801661	5.283333	4.751874
"A_23_P121657"	8.26464	6.951341	7.048605	9.440073	8.287081	5.761828	6.944196	11.184257	10.871379	10.724068
"A_23_P121665"	5.669574	7.0763144	7.21844	7.1490664	6.307338	4.4460154	5.946055	6.505447	6.6664424	6.7377005
"A_23_P121676"	11.468331	10.616076	11.578917	11.231995	10.390577	10.1127	10.2877035	11.0119505	11.389207	11.355259
"A_23_P12168"	11.894697	12.125503	12.013908	11.89121	12.026352	12.103631	12.151469	11.793379	11.809839	11.838362
"A_23_P121686"	11.413891	11.794058	11.274507	11.837455	10.896834	10.980363	11.168025	11.403267	11.374197	11.403936
"A_23_P121695"	4.0541606	6.1134963	7.966967	9.762683	9.6357765	12.008024	12.448196	4.906956	4.842033	3.346523
"A_23_P121702"	13.183221	13.890778	13.731705	14.779451	11.685818	11.560427	11.054219	13.481621	14.139336	13.816915
"A_23_P121716"	7.9139876	7.4003477	7.3459735	6.919259	6.8491635	6.4804	6.9390097	8.033983	7.103252	8.818968
"A_23_P121722"	12.00645	11.048171	10.486183	11.561639	11.943779	12.0110655	12.780546	11.422234	11.272377	11.210053
"A_23_P12173"	12.019744	11.658358	11.824163	11.758609	11.935051	11.886415	11.529671	11.566989	11.456185	11.386954
"A_23_P121773"	11.457466	11.565574	11.636356	11.479963	11.465764	11.448252	11.353846	11.389207	11.771116	11.62733
"A_23_P12178"	8.887942	8.930008	8.841753	8.802916	8.9403715	8.96493	8.391544	8.299444	8.345117	8.219352
"A_23_P121783"	8.765295	9.00152	9.440541	9.669953	10.358097	9.30882	10.045529	10.026712	9.560674	9.699007
"A_23_P121795"	9.917424	5.9945984	8.208017	8.041329	9.860438	9.583274	7.6696935	11.465417	11.819438	11.439119
"A_23_P121806"	11.047035	11.231076	11.220452	11.129686	10.942754	11.354867	11.318291	11.166443	10.944378	11.2530775
"A_23_P121813"	4.2368083	1.577782	2.5821717	3.0918882	1.5786736	1.577067	3.013071	6.9913487	7.099285	8.000253
"A_23_P121825"	9.696459	9.914505	9.944448	10.036913	10.037444	10.322926	10.200912	9.611369	9.37936	9.584058
"A_23_P121851"	8.458548	5.9633837	6.754627	5.5039186	6.46556	7.1560063	4.731177	7.4711323	7.879744	7.1654134
"A_23_P121869"	8.521631	8.22404	8.305987	8.194511	8.599731	8.591585	8.785722	7.604782	7.581392	9.138843
"A_23_P121875"	8.439199	8.192486	8.778931	8.286535	8.17854	8.264786	8.585557	8.788679	8.393361	8.567761
"A_23_P121885"	5.558316	6.852816	5.62209	6.932081	7.494101	7.252804	7.4438477	8.313632	7.9774914	7.5321183
"A_23_P12189"	10.170075	10.103974	10.200912	10.072181	10.013529	10.342618	9.9739485	10.062622	10.175802	10.282842
"A_23_P121898"	8.407189	9.024199	8.754158	8.846811	8.536434	8.651774	9.448359	9.117769	8.648737	8.588071
"A_23_P121914"	3.7655315	4.6891146	3.7194736	3.8403986	4.535138	4.539726	4.4267035	1.8890494	2.6776469	3.090187
"A_23_P121926"	13.440817	12.202058	12.519007	12.446937	13.359256	12.686419	13.062557	13.65966	13.273931	13.307279
"A_23_P121939"	8.017466	8.166913	8.440844	8.281263	8.341294	8.632049	8.654413	8.501299	8.515607	8.441503
"A_23_P121945"	11.225578	10.8031	11.284373	9.974303	8.509612	9.012527	9.558983	8.317799	9.734424	9.04474
"A_23_P121956"	6.8503003	7.810065	7.2253175	7.852258	8.226396	8.5723505	7.100519	8.0667	7.689167	8.2873
"A_23_P121971"	1.6989766	1.660187	1.7192932	1.7306746	1.6948328	1.7285943	1.6937301	1.7799832	1.6939359	1.7737284
"A_23_P121976"	1.7877235	2.2072825	1.7126491	1.5804727	2.1385844	1.5504799	1.5663674	1.6009429	1.6436621	1.5881431
"A_23_P121987"	2.2715209	1.5868896	1.5877988	1.6024152	2.7988942	1.577719	4.638052	2.1594372	3.3743832	4.8848867
"A_23_P12199"	6.588751	4.4983363	5.6232595	5.0538263	5.085285	4.681768	4.5043793	5.3848376	6.2632794	6.6876607
"A_23_P122001"	9.673106	10.433879	10.34722	10.786723	10.01682	10.195404	9.65582	10.035228	10.148263	9.984248
"A_23_P122007"	12.402159	11.320666	11.411678	10.700318	10.029888	9.902306	11.576212	10.148139	10.015915	10.116644
"A_23_P122027"	11.969437	12.227461	12.285615	12.145366	11.641864	12.039023	11.911246	11.863681	12.19295	12.27812
"A_23_P122041"	10.091323	10.401342	10.185961	10.29876	10.51414	10.511623	10.60103	10.189646	10.352395	10.494695
"A_23_P122052"	6.212448	3.9492214	5.4068084	5.0480466	6.5747814	3.261801	4.2297006	6.1815763	7.1006527	6.328919
"A_23_P122067"	5.8733993	5.109581	5.491362	5.902087	5.514078	5.8760834	5.635289	5.351237	5.0560884	5.1757865
"A_23_P122068"	7.429555	6.5331855	6.872323	7.242406	7.286584	7.245234	7.2954	6.70377	6.7268248	6.6287155
"A_23_P122077"	1.591465	1.5827016	1.6258185	3.1643715	1.614716	1.6655828	1.59084	1.6528815	1.6078315	1.6686894
"A_23_P122104"	4.241015	4.174269	4.028508	5.3104386	4.494027	4.2882752	4.441866	3.8133292	4.4305277	3.838434
"A_23_P122116"	10.740811	10.360632	10.666874	10.4129095	10.764884	11.099805	11.182676	9.996227	10.068521	9.920918
"A_23_P122127"	9.006595	7.936276	7.3849564	7.158446	9.946329	8.279784	9.127122	8.243178	8.6185255	7.7193637
"A_23_P122134"	3.7483342	3.7968788	4.512358	4.708848	3.5816717	3.4876616	3.774183	3.7308903	3.9028962	3.6923409
"A_23_P122144"	4.973352	4.8127003	5.10162	6.224683	4.739805	5.588197	5.0944266	4.42228	5.3070183	4.611448
"A_23_P122152"	7.3501644	6.9623575	7.627861	7.4086857	7.130371	7.4247713	6.9987125	7.179542	6.859273	7.0296855
"A_23_P122174"	8.489723	8.2063055	7.78502	8.057228	8.16426	7.3956013	8.088209	7.216911	7.8430357	7.301928
"A_23_P122197"	8.821919	8.86061	8.822185	9.211414	8.258858	8.527239	9.608153	7.841254	7.789656	7.9123883
"A_23_P122210"	7.471779	8.276943	7.947819	7.635718	7.6516733	7.129824	6.5091553	8.512624	8.943206	8.478966
"A_23_P122216"	4.4096837	2.5956995	3.867445	3.18071	7.0870976	2.7299726	3.7255845	5.158912	3.9411378	4.32372
"A_23_P122228"	12.481295	12.65564	12.953944	12.656908	12.684437	12.604071	12.575871	11.987145	12.394324	12.266114
"A_23_P122233"	11.7455	11.795534	11.838362	11.696657	11.764732	11.801435	11.96797	11.947127	11.49583	11.715595
"A_23_P122254"	10.147321	9.706128	10.07787	9.996083	10.063011	10.320096	10.265538	10.21359	9.729282	10.053585
"A_23_P122304"	12.618057	12.406797	12.323131	12.314415	12.496267	12.346283	12.626985	12.347834	12.351561	12.1924305
"A_23_P12231"	5.3181605	5.543683	5.131151	4.7349257	6.3774114	6.830756	7.1645403	4.5812087	4.993221	4.98916
"A_23_P122375"	8.377177	8.46523	7.983175	7.8827205	8.128249	8.303817	8.734704	7.434041	7.4402037	7.9821243
"A_23_P122387"	10.507236	10.215288	10.2645855	10.1204405	10.091848	10.5800705	10.485877	9.446655	9.329519	9.814674
"A_23_P122393"	4.784129	5.5529113	4.2667627	4.840067	4.269492	4.6666374	6.1695585	4.516016	4.697516	4.9580836
"A_23_P12241"	8.902652	2.9043577	8.390199	8.103774	8.18583	8.523251	8.205584	8.145118	8.390914	8.906278
"A_23_P122414"	3.8249943	3.8779821	3.247023	3.3073413	3.2592752	5.004155	2.72364	3.6020906	4.0885124	3.709618
"A_23_P122439"	7.470036	6.956303	6.9993906	8.096817	7.167667	6.001027	6.8535733	7.2404294	6.996244	6.8841205
"A_23_P122443"	13.588018	11.396679	14.78391	15.44126	15.801414	14.601235	14.033197	11.073011	11.413537	11.493199
"A_23_P122464"	8.830467	8.370306	8.564758	8.307123	8.448482	8.68343	8.428044	8.294607	8.575416	8.188918
"A_23_P122481"	2.0079288	1.6991953	3.5206895	4.26732	2.8710744	3.9716198	3.5715759	1.7910587	1.7010753	1.783593
"A_23_P122485"	6.0316916	5.8950696	5.708021	6.023872	5.593172	6.0230927	6.277566	5.5071754	6.052953	5.5231643
"A_23_P122493"	2.1281805	1.9843102	2.1110537	1.507168	2.3297446	3.1893384	2.3564496	1.521921	2.9588413	1.5258635
"A_23_P122508"	1.8324138	2.2490926	2.1497955	1.7138537	1.7255528	1.6198763	1.6423242	1.5987852	1.8769623	1.6242683
"A_23_P122531"	15.240692	15.105821	15.418897	14.8844185	14.372457	15.240692	15.651536	14.631501	14.505264	14.5929785
"A_23_P122532"	9.409095	9.2149725	8.846243	8.858572	9.080581	8.794119	9.22469	9.177395	9.695058	9.50229
"A_23_P122545"	13.043133	12.774564	12.883583	12.816861	12.898683	13.043133	13.084788	12.728618	12.784783	12.803933
"A_23_P122563"	8.362981	9.35165	10.1985445	9.524527	8.769621	9.373971	8.739418	10.060484	10.236311	8.981853
"A_23_P122579"	9.523179	9.727033	9.527071	9.480797	9.941832	9.642729	9.836677	9.544831	9.761191	9.6391535
"A_23_P122582"	12.934228	12.771103	13.028371	12.825407	12.958481	12.815489	13.215746	12.894804	12.823202	12.661491
"A_23_P122600"	5.3937783	5.3881006	4.6500664	5.210964	4.8949738	5.3504133	5.4532514	4.6516232	5.1822186	4.556237
"A_23_P122615"	8.6076355	8.9512205	8.854514	8.694424	8.855969	8.901452	8.877642	8.761065	8.942204	8.642421
"A_23_P122624"	9.962631	9.983426	9.9253645	10.130234	9.927274	9.589573	9.959402	9.892984	9.663223	9.770539
"A_23_P122650"	11.9302845	11.160446	12.14993	11.180537	11.766938	12.291605	12.338673	12.955651	13.538204	14.258351
"A_23_P122655"	2.7777584	2.881764	3.054459	3.003412	1.6189078	1.6599956	2.6656466	3.4213412	2.8390203	2.9659543
"A_23_P122662"	11.617431	11.676377	12.0876045	11.679013	13.015523	14.20459	12.950254	11.24785	11.51481	11.754445
"A_23_P122674"	9.228047	9.551907	9.445824	9.175281	9.04282	8.901263	9.160273	9.296588	9.694348	9.287054
"A_23_P122688"	4.2822022	4.7713366	4.3453665	5.0223403	4.1787424	4.8657155	4.9264345	4.5110865	4.0964165	4.3192306
"A_23_P12272"	10.975134	10.953063	11.051012	11.094757	11.249936	11.520649	11.643025	11.025079	11.135266	11.08984
"A_23_P122724"	7.541559	8.044904	7.131235	7.1427665	9.919768	7.725076	9.485939	7.738886	7.705601	7.3780465
"A_23_P122775"	9.349749	9.8475065	9.990755	9.783231	9.899617	9.998581	10.298959	10.082021	10.109757	10.030196
"A_23_P122782"	14.241349	14.486823	14.355048	14.536507	14.274765	14.02857	14.475688	13.804652	13.59085	13.8711405
"A_23_P122796"	8.298562	8.550515	8.378555	8.522417	8.45322	7.349035	8.41183	7.731731	7.2776504	8.424969
"A_23_P122805"	10.027549	10.034041	10.236498	10.085247	10.134104	10.326948	9.788153	10.408009	10.172595	10.341314
"A_23_P122815"	9.434743	9.378969	9.208726	9.702106	9.619442	9.227223	9.390919	10.280562	10.480914	10.3862095
"A_23_P12282"	10.784047	10.909912	9.983656	9.685413	9.170443	9.121768	9.584223	8.793924	9.337737	9.438926
"A_23_P122852"	15.146526	15.123343	15.369986	13.576739	14.495842	14.070402	13.847068	13.091121	13.599261	13.161077
"A_23_P122863"	10.000687	9.464361	9.902819	10.3758135	9.612381	9.335092	9.496	10.577307	9.790922	9.839677
"A_23_P122876"	12.379353	12.043907	12.532536	12.109413	12.099611	12.069105	12.178314	12.082105	12.372485	12.086845
"A_23_P122896"	7.04593	6.373498	6.688042	6.082251	6.2699203	6.7505646	6.6311884	5.7393255	5.9579167	5.6735654
"A_23_P122906"	12.628574	12.182383	12.302335	12.109904	11.781508	12.728164	12.143822	11.45796	12.075235	11.776259
"A_23_P122915"	14.719108	14.261809	14.733835	13.934331	14.299107	14.187473	14.618458	14.474334	14.846981	14.509975
"A_23_P12292"	2.7498615	1.5540737	1.5531101	1.5756173	1.5307328	1.5434101	1.5605055	2.38538	1.5542746	1.5652696
"A_23_P122924"	6.8362756	3.1749594	5.47854	6.607224	8.121673	3.4826992	6.342926	6.489634	7.501413	7.1741896
"A_23_P122937"	6.6233625	7.899338	5.839027	5.787704	8.818568	9.436338	10.063925	8.398083	8.248732	7.4283757
"A_23_P122947"	6.9739676	7.686691	7.367908	7.5685196	6.4568486	6.598629	6.8761797	6.1601624	6.606007	6.445953
"A_23_P122959"	6.665832	7.730827	6.642332	7.6696935	3.5725186	4.0807676	3.9719563	5.4279547	6.6494064	7.1829486
"A_23_P122976"	7.4086857	5.060704	10.095053	7.7263436	10.058779	9.529223	10.547496	10.022673	9.012527	9.177151
"A_23_P123010"	7.052167	7.3961635	7.346216	7.1688237	7.332144	7.8039956	7.779525	6.5957074	5.779465	6.62491
"A_23_P123015"	6.444748	6.5286226	6.7123394	6.8319983	7.009793	6.7622604	7.264206	5.756601	6.4115114	6.3677073
"A_23_P123018"	9.693592	9.656456	9.920918	9.919973	9.614787	9.475489	9.435418	9.920628	10.162463	9.962385
"A_23_P123022"	6.724128	7.3066726	6.97526	6.7185693	7.068294	7.070966	7.616544	6.6384234	7.9844437	7.6252265
"A_23_P12303"	8.396593	7.826404	8.040935	8.153803	6.8139954	6.935914	6.6146474	7.4007645	7.9098744	7.4247713
"A_23_P123039"	7.6789045	7.8172565	7.904224	7.896254	8.039653	7.898823	7.819192	7.456202	6.7084312	7.4348297
"A_23_P123060"	6.7746887	7.0802503	7.023566	7.6372333	8.02129	5.886548	2.9047759	9.597699	8.321045	7.6049924
"A_23_P123071"	7.2417135	4.91547	6.3511333	6.6293693	7.439922	5.7644143	6.074971	6.994302	6.1767797	6.5298443
"A_23_P123086"	8.889509	9.100406	9.792943	9.355786	9.745966	9.401457	7.790996	9.033637	8.57798	8.422225
"A_23_P123096"	1.7702712	1.7737284	1.9428276	2.2593725	1.8841351	2.1052732	2.0043106	1.8713073	1.7985036	1.9238479
"A_23_P123108"	6.5899925	6.5453534	6.509534	6.8081393	6.336927	6.427193	6.6546087	6.170912	6.379813	5.6996155
"A_23_P123112"	1.644649	2.6661077	1.5252254	1.5361214	2.7318747	1.805997	1.524535	1.5391054	2.2239933	1.518678
"A_23_P123125"	11.077449	11.48953	11.511732	11.12733	11.252758	10.979994	11.620439	10.839849	11.075515	11.030281
"A_23_P123133"	8.397404	8.848649	8.766955	8.64049	8.959028	9.356291	9.293125	7.908437	7.676795	8.046909
"A_23_P123164"	6.007539	6.263867	5.5899954	6.011082	5.679343	6.3675194	6.2656455	5.574646	5.90119	5.58236
"A_23_P123172"	8.081085	8.641354	8.179903	9.203624	7.004433	3.3518996	5.002073	8.579876	8.052204	7.66496
"A_23_P123193"	9.720383	9.440271	10.084006	9.630159	9.649925	10.291855	10.139745	10.815938	10.977022	10.877915
"A_23_P123228"	1.8074815	1.77668	1.9697987	2.1761692	1.8596604	2.1716816	1.9764884	1.9525808	1.8001941	1.986633
"A_23_P123234"	5.5057144	3.94438	4.6537466	4.3904123	4.5295634	3.1106272	4.589368	4.171603	2.4961019	3.1984484
"A_23_P123242"	8.147749	7.290355	7.873107	7.454662	7.719185	7.553666	7.5651016	7.8405538	8.16336	7.8027277
"A_23_P123256"	9.0160675	9.772325	9.181833	9.117977	8.957067	9.326745	9.467062	9.485939	9.9739485	9.239074
"A_23_P123265"	9.071977	9.557997	9.321743	9.845201	9.23512	10.109757	10.315453	8.955674	8.778821	9.141523
"A_23_P123276"	7.2484603	7.695236	7.248002	7.190383	7.14463	7.0703554	7.380531	7.7463355	8.620199	7.6961656
"A_23_P12329"	8.518917	8.522215	8.838474	8.518248	8.610354	8.4925995	9.396076	7.932814	8.096547	7.9506617
"A_23_P123308"	2.1159308	2.307824	6.846126	6.6759343	4.7719536	5.0506783	6.187872	3.7430415	3.7285154	4.0762124
"A_23_P123315"	11.632645	11.522263	11.825277	11.746246	11.129418	11.267745	10.81944	11.297222	11.6603	11.637407
"A_23_P123330"	15.545828	14.75283	15.187812	15.047883	15.334973	15.593369	15.262877	15.563939	15.429815	15.433081
"A_23_P123336"	10.229536	10.02088	9.936404	10.02132	10.437258	10.619662	10.446819	9.335671	9.654495	10.00779
"A_23_P123343"	8.977012	9.141845	9.2149725	8.916049	8.887942	8.565463	8.96493	9.243922	9.117651	9.078262
"A_23_P12336"	10.045529	10.67153	10.352395	10.834828	10.25531	9.762806	8.690698	10.663414	10.571111	10.711438
"A_23_P123362"	2.5908084	3.3508081	3.1431844	2.4556599	4.7463703	3.3961074	2.917075	1.7574965	3.2207742	1.5142107
"A_23_P123393"	6.3983383	6.5964246	6.3436146	6.5298443	6.594094	6.6050863	6.6891193	8.5400505	7.563898	7.663826
"A_23_P123402"	1.7126491	1.7006195	1.8152713	1.989019	2.0820713	1.8677796	1.8297791	2.5887704	3.0507402	3.18978
"A_23_P123413"	6.661819	6.8449244	5.0011196	6.315216	1.7006195	2.6239955	1.6930901	5.739057	6.581681	7.380531
"A_23_P123424"	4.0153513	4.0650835	4.1405315	4.2322607	3.3137636	3.4672406	3.8735697	4.4067163	4.2511125	4.32681
"A_23_P12343"	13.8156395	14.159803	13.753146	13.885373	13.533553	14.857711	13.621098	13.447409	13.199871	12.670256
"A_23_P123440"	8.2549715	8.335363	8.1325245	8.127584	7.452224	7.5434613	7.698834	8.208967	9.05354	8.148305
"A_23_P123448"	3.4927132	6.8400474	6.423948	3.7737212	9.258287	9.790653	8.772516	6.353298	4.1570706	4.8862314
"A_23_P123454"	8.321177	10.553673	9.31569	9.562579	8.770221	9.585487	9.914111	8.957663	9.157971	9.050852
"A_23_P123463"	5.805355	6.1695585	6.212701	6.0525866	4.860315	5.580559	6.204966	5.3127346	4.825791	5.631873
"A_23_P123466"	6.194664	6.594094	6.674896	6.633411	5.8181863	6.1756744	6.4779763	5.914394	5.4230165	5.980006
"A_23_P123478"	7.9301014	8.2525	7.586854	8.107088	8.748558	8.512901	9.063465	7.6414413	9.220768	8.816793
"A_23_P123488"	1.5427516	1.8380672	1.5645976	6.036173	1.5626355	1.5731897	2.879888	1.5947708	2.1403859	2.1431892
"A_23_P123503"	4.6416535	4.4030795	2.7294316	1.9743686	5.3003426	6.1849475	6.0547953	3.9239945	4.8657155	4.7891946
"A_23_P123522"	5.8839016	6.1704993	6.2057505	6.0933757	6.035758	6.2898955	6.292131	6.5028515	6.2513256	6.317813
"A_23_P123539"	10.615163	10.776555	10.63016	10.7331085	10.546622	10.747494	11.50722	10.321021	9.758133	10.48951
"A_23_P123544"	9.519154	9.262446	9.190693	8.578644	9.798706	9.50169	10.247784	9.484381	9.534028	9.517558
"A_23_P123555"	12.500875	12.922263	12.359436	12.972135	13.195304	13.447409	13.382456	12.659561	13.040914	12.515652
"A_23_P123563"	16.84916	16.583462	16.994608	16.803358	16.803358	16.950897	16.599363	16.950897	16.950897	16.943348
"A_23_P12357"	5.6769586	3.2066696	6.2873516	1.6392322	1.5702201	4.952105	3.5033393	3.8536239	4.988494	5.0317345
"A_23_P123578"	8.615358	8.960777	8.851881	8.719144	8.231171	8.541803	8.189579	8.211479	8.420335	8.275478
"A_23_P123582"	8.331468	8.538704	8.580719	8.698685	8.455845	8.449124	8.392007	8.886957	8.884647	8.670722
"A_23_P123596"	5.361651	1.7897038	6.115838	3.3957477	1.8797617	2.1951735	2.0157428	7.615297	9.438583	9.910367
"A_23_P123608"	7.8499737	8.9850855	8.208553	9.382942	9.336906	10.044468	9.224922	8.1497755	7.9009123	7.686691
"A_23_P123622"	8.773056	8.202844	9.065501	8.341976	8.666068	10.020381	7.756649	9.805051	9.678646	9.409314
"A_23_P12363"	8.58671	9.557573	9.36138	9.187423	9.873022	10.089376	9.533398	7.22817	8.632515	8.859024
"A_23_P123645"	10.015915	10.187516	10.395815	10.025203	10.359293	10.409088	9.571779	10.436466	10.887785	10.359666
"A_23_P123666"	8.024264	7.9416127	7.260267	6.9355664	8.567579	8.634189	8.187687	7.3826084	7.438015	7.0350795
"A_23_P123672"	11.489039	11.647987	11.312933	11.5465555	11.546817	11.493199	12.155257	10.991824	10.97156	11.323214
"A_23_P123692"	9.300956	9.173336	9.095335	8.905789	9.040832	9.543375	9.606657	9.393674	9.464004	9.542977
"A_23_P123704"	1.8598738	2.7600322	2.5089722	4.6340256	2.51938	2.231078	4.755289	1.8612998	2.1400511	3.3095005
"A_23_P123714"	4.407138	4.3448844	4.100514	4.1662025	4.4096837	4.7132635	4.627561	4.0227537	4.6351132	4.3666553
"A_23_P123727"	7.216911	7.3406906	7.044936	7.235685	7.357262	7.4715014	7.7403507	7.593877	7.29997	7.5779395
"A_23_P12373"	2.881764	2.7854464	2.3407576	2.9711723	3.107241	2.6022167	2.321425	1.935026	2.353756	1.9550506
"A_23_P123732"	11.000559	10.749643	11.355983	11.090739	10.872197	11.220736	11.129686	10.824588	10.930632	10.657869
"A_23_P123763"	7.001531	7.6386046	7.369357	7.6543365	7.4793406	7.5362406	8.1776495	7.529009	7.3008204	7.4367704
"A_23_P123794"	4.5689774	5.0196686	4.788453	4.7550516	4.2089324	5.1727185	4.589712	6.6868744	8.449682	9.427945
"A_23_P123830"	3.8630486	3.6465275	3.7164571	2.8788466	3.7746148	4.236288	3.0567565	3.753234	4.539967	3.6609118
"A_23_P123838"	2.4756289	3.5579188	3.4553351	3.61466	2.881489	3.032586	2.974444	2.654055	2.8099818	1.9912555
"A_23_P123848"	9.9952345	8.802916	10.009726	8.722239	9.222732	8.124264	9.051345	9.507825	8.967799	9.10666
"A_23_P123853"	7.493398	4.627561	8.3272085	5.834715	12.00645	4.568306	10.542068	8.750627	7.2128086	7.2436824
"A_23_P12386"	1.7165807	1.7138537	1.8340487	2.0517776	1.7834623	1.8922617	1.8538518	1.7665597	1.7327732	1.7993708
"A_23_P123866"	9.71469	10.35418	10.013046	9.884481	10.295115	10.539831	10.525293	9.338879	8.806934	8.668211
"A_23_P123874"	9.538604	9.474014	9.485939	9.213637	9.196745	9.558592	9.376404	8.670853	8.797804	9.068176
"A_23_P123882"	5.538653	5.5045743	5.7431765	6.0330195	5.720636	5.7224503	5.5440874	6.1577673	5.979544	6.013738
"A_23_P123905"	9.110936	9.629467	9.20389	9.481739	9.082845	9.434578	9.725314	9.45483	9.602591	9.537599
"A_23_P123916"	8.519891	8.524844	8.805443	8.319628	8.2549715	9.245278	8.477902	8.567761	8.970089	8.993873
"A_23_P12392"	4.762792	3.7621746	3.8961942	3.6032789	4.7502775	3.3366618	4.5445786	3.512479	3.269537	3.3178604
"A_23_P123943"	6.869863	6.9691863	6.813501	7.188895	6.7744	7.1092205	7.6179366	6.9702373	7.7426496	7.2181187
"A_23_P123974"	10.825048	10.503639	10.847778	10.324544	10.560819	10.525701	10.806613	10.41985	10.54316	10.52222
"A_23_P123987"	8.428562	8.860844	8.392515	8.405532	7.8534837	8.21815	8.16197	7.839276	7.285266	7.67191
"A_23_P124003"	6.39028	6.0730653	6.204966	6.0144353	6.196773	6.941045	8.810084	6.1594954	6.701285	6.4506903
"A_23_P124022"	11.140245	11.488698	11.577172	11.610269	11.608336	11.628248	11.822626	11.427465	11.683389	11.31575
"A_23_P124024"	8.08471	8.646534	8.732638	8.689709	8.357951	8.745331	8.824365	8.113468	7.813391	8.333975
"A_23_P124035"	12.775507	13.016349	12.957858	12.925125	13.002887	12.784048	13.017512	12.714899	12.850807	12.873329
"A_23_P124044"	10.417816	10.790756	10.703498	10.6038065	10.621254	10.8224945	11.360776	10.614204	11.04309	10.743288
"A_23_P12405"	6.1459913	6.079974	5.473747	7.2396717	4.8560247	5.301951	5.949939	9.3776245	9.243348	9.538824
"A_23_P124078"	6.1148825	6.4982615	6.4963903	6.298241	6.3314657	6.4291344	5.9728093	6.72208	6.815492	6.5829806
"A_23_P124084"	12.331667	12.941327	12.078091	13.189882	10.708618	11.252415	9.8832035	11.919793	12.109904	11.600812
"A_23_P124095"	2.976588	1.9224896	2.98603	2.7837865	2.3430762	2.6881938	1.7172884	2.3844185	2.461663	1.6071992
"A_23_P124108"	7.5993814	7.833764	6.913945	6.6743417	8.967391	7.5580425	7.7313213	7.406103	6.782222	6.785361
"A_23_P124122"	9.749987	9.398918	9.603901	8.525682	9.863524	9.783878	9.735392	9.165837	8.798412	9.453954
"A_23_P124132"	12.103631	12.728164	12.297469	12.694452	11.801435	12.189844	12.650269	11.406286	11.954061	11.865632
"A_23_P124164"	8.373742	8.947786	8.859497	8.831274	8.614321	8.6868	8.573147	8.398201	8.190826	8.462485
"A_23_P124177"	11.593369	12.421696	12.510105	12.274664	12.446385	12.255772	11.762465	10.898734	10.728448	10.978657
"A_23_P124190"	6.664732	7.57009	7.1378164	8.027565	6.9668264	6.187007	5.4087634	7.8773904	8.424673	7.950412
"A_23_P124202"	4.59407	4.7188	5.454811	5.4668255	4.6551023	5.4616437	4.831963	4.7613807	4.595971	4.484815
"A_23_P124224"	9.483676	9.3922825	9.378362	9.301373	9.637914	9.935868	9.491219	9.518368	9.550279	9.455895
"A_23_P12423"	10.858625	10.651682	10.661999	10.928887	9.220395	9.652074	10.075449	10.700634	10.990288	10.679829
"A_23_P124232"	4.315754	8.396195	5.9107285	8.62499	1.8472763	7.080501	7.3295736	3.800357	4.4840274	5.175531
"A_23_P124252"	5.637532	4.4141626	4.9512053	4.542045	6.536369	8.365367	8.206657	6.623919	7.2543664	7.607357
"A_23_P124300"	5.1899385	5.436264	5.2042265	7.5779395	3.8582273	4.182352	3.8850596	3.468385	3.5773716	4.1426697
"A_23_P124313"	6.0875554	6.7137966	6.3862076	6.4501987	5.7327604	6.9048877	6.7431116	5.3678026	5.5114045	5.4457893
"A_23_P124327"	9.466564	8.9621725	9.0406475	9.0903	9.105968	9.132695	9.534531	8.902398	9.068176	9.18398
"A_23_P124335"	5.3118267	5.32843	5.0667973	7.5088263	6.8607583	8.608765	8.896968	4.597554	5.619152	5.8622947
"A_23_P124343"	2.0446687	1.9323537	1.8322744	1.9152203	2.19906	1.9010385	1.8315132	1.8760582	1.763782	1.892974
"A_23_P12435"	6.4580297	6.8987465	6.6574597	6.861467	6.3277197	6.0887585	5.6780663	6.6223288	7.1302404	6.779702
"A_23_P124356"	4.7206607	4.3542957	3.73461	4.3422046	3.349603	4.646877	4.267544	3.7663279	3.5118876	3.8103333
"A_23_P124358"	11.590234	11.25207	11.556875	11.375056	10.690571	11.043571	11.115782	11.128641	10.966031	11.226031
"A_23_P124377"	2.826716	6.159277	4.053636	1.8664359	3.4385915	3.3541226	4.828961	4.4809103	2.796467	4.148654
"A_23_P124384"	2.3847225	3.4633465	3.864274	3.0724294	6.1728635	6.868393	5.1533413	5.9920554	4.7385077	4.5303535
"A_23_P124402"	2.2348394	2.8418458	3.1850867	3.0917273	3.0239453	2.7216551	2.5433366	1.9486284	2.5843601	3.3314688
"A_23_P124417"	4.0069003	5.796193	4.667248	4.648612	4.6728106	4.2119293	6.8449244	1.5025376	1.4922172	2.0778978
"A_23_P124427"	7.7370677	8.474871	7.9594455	8.507353	8.01917	8.529308	8.21772	8.077749	7.2877145	7.8827205
"A_23_P124438"	5.3866014	6.21195	5.2950897	6.0226636	6.0957146	5.330046	6.1692944	4.9647074	6.810734	6.211253
"A_23_P124456"	5.149975	5.6916914	5.9684753	5.888079	6.4100103	7.3372564	7.1357594	5.960619	6.783009	6.280086
"A_23_P124476"	9.355572	9.975153	9.992174	9.712387	9.579272	9.8523655	9.793245	9.75537	9.444656	9.67354
"A_23_P124486"	7.3076158	7.329788	6.753364	6.8279085	7.320955	7.951492	8.126189	6.503334	6.0388517	6.698531
"A_23_P124514"	7.261069	8.712487	7.5434613	8.27243	7.3770146	7.958042	7.775696	7.8835454	8.4110985	7.5514026
"A_23_P124522"	11.947483	12.12707	11.880975	11.989635	11.67019	11.89256	12.105468	11.966431	12.35419	11.929027
"A_23_P124534"	2.3362617	2.491209	4.660117	3.5852668	2.5903978	1.7331277	2.2448084	4.198019	3.3084743	3.614
"A_23_P124542"	5.393068	5.9509664	6.0049	6.0586085	5.5904145	5.9802637	5.875495	5.6563797	5.245035	5.7001905
"A_23_P124559"	7.370454	7.957563	7.4891043	7.90199	7.9138603	8.243431	8.26541	8.872382	8.22807	8.123128
"A_23_P124570"	7.295026	8.072206	7.9272847	7.393056	7.5503416	8.023092	7.871121	6.898377	6.272858	7.035488
"A_23_P124585"	7.9645433	7.5031204	8.043321	7.6018896	8.00151	8.371576	8.32454	6.5965695	7.6372333	7.0667424
"A_23_P124619"	5.261105	1.7048765	3.2196527	4.5320835	3.1023061	2.3163092	1.7774982	4.675809	6.7805657	6.0340886
"A_23_P12463"	12.245568	12.663731	12.072069	12.459619	12.011926	12.035689	12.843663	12.59151	12.358442	12.440178
"A_23_P124632"	6.221616	2.1383648	2.4822896	2.68856	9.539906	2.1846623	4.236288	4.304975	2.923086	2.0308
"A_23_P124642"	6.597494	2.8769863	4.9356346	4.293051	5.928333	4.2615643	6.384015	5.160905	7.548076	7.1693664
"A_23_P124661"	12.870735	12.526713	12.860442	12.768246	13.273931	13.256916	13.205004	12.766119	12.687404	12.526713
"A_23_P124699"	4.5490227	4.889879	4.2755456	4.519768	4.6327276	4.6685257	5.1304145	3.781683	4.9667463	3.9903178
"A_23_P124733"	6.4546366	7.1308837	6.9248247	7.0115614	7.021638	7.175189	6.9215174	6.7234344	6.5528064	7.1109505
"A_23_P124742"	11.191409	11.285232	11.513452	11.362334	11.816978	12.551482	12.092773	10.543403	10.633364	10.5776005
"A_23_P124760"	9.387863	9.235847	9.408963	9.259233	9.530754	9.813457	9.862369	9.012182	9.187779	9.314831
"A_23_P12477"	9.709655	9.696052	9.559666	9.472022	9.465379	9.376404	9.555341	8.486234	8.330216	8.454417
"A_23_P1248"	6.1256156	6.3064547	6.521598	6.367237	6.771151	7.356134	6.252285	6.675793	6.7648354	6.9085627
"A_23_P124805"	3.2253866	3.1036136	3.709618	3.0237257	3.0987222	3.331071	3.6276639	3.385905	1.9550506	2.6186595
"A_23_P124823"	11.722237	11.628248	11.536716	11.617431	12.013908	12.086103	12.251604	11.953461	11.463266	12.052149
"A_23_P124837"	8.105318	7.529461	7.610289	7.349951	8.438077	7.488933	7.3111362	8.082756	7.2801514	7.232876
"A_23_P124855"	7.5231533	7.9025197	7.8822527	8.150547	7.7853656	8.26282	8.010761	8.304347	8.446781	8.1313095
"A_23_P124892"	5.599427	6.0461493	5.2310224	6.4706926	4.762179	5.549926	4.7869644	5.6039867	5.7238727	5.372963
"A_23_P124905"	2.1103957	1.9499459	2.2141669	4.2835555	3.5179489	7.501413	4.5819306	6.548438	4.675809	5.474473
"A_23_P124912"	13.697009	13.965214	14.130813	14.130813	14.012111	14.1369915	13.040031	13.84305	13.961533	13.768517
"A_23_P124927"	7.336571	6.088569	6.2463126	6.240233	7.394177	8.171524	8.016144	6.711402	7.929087	7.842593
"A_23_P124934"	5.5711017	5.486751	4.5199976	3.9395018	6.477383	5.125133	7.3249793	5.2192006	5.296554	5.246514
"A_23_P124946"	7.8079705	7.9969463	7.219049	8.612661	9.267685	8.728382	9.702106	8.219987	8.643824	8.970896
"A_23_P124962"	11.732788	10.998902	11.320293	10.951628	11.816006	11.546817	11.6165	11.384856	11.09403	11.337913
"A_23_P124977"	1.909802	1.81585	1.9734619	2.3280537	1.967458	2.214805	1.9625334	2.0198092	1.8378533	2.0225706
"A_23_P124988"	4.5027027	4.733023	4.9201927	4.9187484	4.1945972	4.8840156	4.79776	4.4504337	4.6726685	4.1650605
"A_23_P125001"	7.7408633	6.787659	7.3858314	6.7027206	7.42129	8.247499	8.212247	6.9215174	7.03716	6.7553124
"A_23_P125016"	5.5350356	5.0827703	5.3024364	5.454299	4.3839474	5.294977	5.1057653	6.0481153	5.768262	6.009844
"A_23_P12503"	11.14275	11.060493	11.198718	11.017608	10.493812	10.938606	10.902356	10.921023	10.993835	10.949468
"A_23_P125033"	6.1321917	5.8780236	5.79391	5.8522863	6.2063265	6.1732807	5.750443	6.9502187	7.665672	6.5505486
"A_23_P125042"	6.181177	6.041628	6.127171	6.289349	6.0037923	6.4624715	5.957101	5.719832	5.476181	5.726849
"A_23_P125056"	10.498715	8.191576	9.665443	7.3577056	11.536371	10.735661	11.7275	9.788829	10.024085	10.35024
"A_23_P125067"	1.9283198	3.25418	2.5577888	3.6448774	1.567735	3.338756	3.8750138	3.7203155	4.1170278	3.1016247
"A_23_P125078"	13.469393	13.435774	13.719654	13.216963	12.736965	13.417919	12.282448	13.095609	13.307279	13.114939
"A_23_P125082"	6.2272224	6.1986165	5.4994974	5.5489316	5.4265833	6.0420885	5.7011275	5.6449122	4.8754153	4.830343
"A_23_P125107"	14.874101	12.85892	13.337163	13.769203	13.387311	11.820449	12.695403	13.68909	13.206629	13.251044
"A_23_P125109"	15.957432	12.89974	14.268632	14.979241	15.024556	12.724249	13.44406	14.471744	14.322008	14.603506
"A_23_P125117"	11.444393	10.865853	12.363585	11.20134	10.638642	10.500493	10.02453	9.760274	9.617874	9.382335
"A_23_P12514"	14.020918	14.759243	14.002258	13.785275	13.280821	13.0750675	13.170109	13.2668	13.346007	13.542098
"A_23_P125147"	7.0342917	7.5621967	7.554973	7.3834357	7.5080566	7.232876	7.3147125	7.16821	5.762193	6.751427
"A_23_P125157"	8.087693	7.901247	7.8752785	7.788804	8.0157175	8.142514	7.5470443	7.8007545	7.479677	8.239495
"A_23_P125164"	8.323389	8.173706	8.361506	8.422803	7.451997	7.8696365	7.114979	8.54048	8.637969	8.276273
"A_23_P125171"	5.286269	5.395105	5.4469337	5.2105875	4.670066	5.0743117	4.503701	5.7729774	6.697277	5.739057
"A_23_P125176"	2.5161614	3.5517337	3.4046693	2.3581295	3.7986767	3.9808083	3.7509575	2.307824	3.0275602	2.2382894
"A_23_P125204"	3.9194517	4.479454	4.19876	4.0859213	3.1998825	4.3979535	4.2219944	3.99911	4.7789903	4.4899096
"A_23_P125233"	10.249142	5.639759	9.573549	9.12883	11.572851	7.209595	8.811138	11.187286	8.529095	7.8475604
"A_23_P125253"	6.7194486	5.4116855	6.217755	5.448535	7.082874	3.6393137	4.4393444	7.172894	5.7512174	5.972035
"A_23_P12526"	9.666732	9.897335	9.7364025	10.035477	10.60598	11.312305	11.132859	9.206187	8.584866	8.935468
"A_23_P125265"	12.524135	12.884464	12.555602	12.913558	12.988523	12.579855	13.007295	12.882326	12.692414	12.771758
"A_23_P125278"	1.7875646	1.675454	1.7381115	1.8469291	6.217755	1.7659467	4.1778483	1.7552989	1.6777596	2.3009298
"A_23_P125286"	2.9946249	2.3383057	3.760438	3.57648	3.6432025	3.6017408	3.3029501	2.7059896	3.1785595	2.7337742
"A_23_P125303"	11.171302	13.357472	10.306213	13.329946	12.068687	13.415732	12.146874	13.03945	13.1789875	13.166782
"A_23_P12533"	1.7558796	1.7564731	1.8644214	2.1662552	1.8677796	2.0228236	1.907814	1.8764001	1.8234608	1.9082545
"A_23_P125348"	9.642326	10.048363	9.570482	9.609568	9.97748	10.06644	10.355133	9.332848	9.708264	9.672713
"A_23_P125383"	2.3668053	2.5855362	2.4158664	2.7520204	1.8924484	3.2550454	2.0194056	2.5028133	2.0858552	2.284807
"A_23_P1254"	13.238916	14.170105	13.434675	13.824172	13.622681	13.248494	13.532656	13.604449	13.333987	13.471385
"A_23_P125408"	7.862979	8.236004	8.537643	8.25649	8.102913	8.66803	7.938724	8.577761	8.670521	8.520153
"A_23_P125420"	13.756213	14.140764	14.163146	13.5733	13.866423	13.791313	13.980478	13.468301	14.017357	13.713371
"A_23_P125423"	10.031083	6.3584366	9.562949	7.6946487	11.210613	6.5452514	8.501947	10.323814	9.73895	9.037715
"A_23_P125435"	5.705706	10.947296	7.6036444	10.017257	10.763664	11.634892	10.316281	11.352474	11.230344	10.963162
"A_23_P125451"	9.906297	8.282202	8.964296	7.8190455	8.567052	6.596196	8.470825	6.917156	7.429957	6.6720996
"A_23_P125475"	3.043957	4.1810665	3.9183366	4.3791447	3.3354216	4.4504337	4.6899395	3.43227	2.389512	2.5750968
"A_23_P12549"	8.035528	7.610289	5.9443846	5.793097	9.3235035	7.8004684	8.08203	8.300718	8.368053	7.566224
"A_23_P125495"	4.1304154	5.283333	5.1097445	5.1101384	5.0366545	5.2667856	5.0979366	3.8932273	5.254231	4.446822
"A_23_P125505"	1.5722518	4.622884	1.6466707	6.0379267	1.7083118	2.4498167	1.6789558	4.603798	5.222106	4.97839
"A_23_P125519"	16.345627	16.887806	16.297487	16.956614	16.549217	16.956614	16.331244	16.394978	16.255165	16.243238
"A_23_P125533"	8.234093	8.878934	8.674641	8.960122	7.720891	8.42826	8.311839	7.73216	7.603211	7.6872654
"A_23_P12554"	7.553026	4.752635	2.0239882	5.373395	5.1461086	2.7535286	5.2500825	2.0390158	1.8256658	2.082761
"A_23_P125541"	9.737624	11.133332	10.158693	11.026456	10.346393	10.42745	10.179018	9.222181	9.396755	9.688139
"A_23_P125553"	10.554182	11.508728	10.8224945	11.3221445	9.696052	10.294308	9.553953	10.394752	10.243999	10.307775
"A_23_P125579"	9.2427435	10.220909	8.785499	9.028667	9.786874	9.53153	10.411822	8.545733	7.8935995	8.483781
"A_23_P125588"	1.6162336	5.2800336	4.5842247	1.6857104	1.6559589	2.2768784	3.781434	1.675454	2.3523002	1.6637273
"A_23_P125596"	7.301278	8.3536005	7.20657	8.216017	7.152362	7.2587533	7.6437917	7.293751	8.28834	8.069044
"A_23_P125618"	3.9429688	7.073875	5.82447	3.638957	3.863695	4.367805	3.7520192	4.6337776	4.1387296	4.087512
"A_23_P125624"	10.650581	11.147417	10.407454	11.290811	10.401342	10.001582	10.401169	10.808313	10.627947	10.707239
"A_23_P125639"	6.5995703	6.590153	5.7803726	5.685949	5.075831	5.477373	5.393068	5.5153894	6.2589097	5.924454
"A_23_P125643"	5.9085164	3.8133292	5.1582007	4.520237	5.6424594	4.3231907	4.70015	5.26324	6.6452856	6.39309
"A_23_P125656"	10.876752	11.758271	10.9154	11.93348	11.870834	11.615308	11.583588	11.06795	10.471144	11.182054
"A_23_P125668"	8.582477	7.62087	8.112198	6.660559	6.986912	5.0502543	5.731514	7.680201	7.0947857	8.268834
"A_23_P125680"	9.444294	11.353846	10.753483	11.548414	7.353355	9.444656	7.5365143	8.300396	6.7388625	7.929247
"A_23_P125686"	2.0778978	3.5669615	2.5740762	3.315164	2.6243033	1.5209872	1.5366575	1.5540241	1.537968	1.5392679
"A_23_P125705"	11.240007	10.590067	10.559828	11.459745	9.752201	10.188211	9.649007	10.881565	10.388987	10.622272
"A_23_P125717"	10.35418	11.43413	10.559402	11.254932	9.114857	9.449186	7.3548746	10.607308	10.544485	10.473171
"A_23_P12572"	8.318291	8.046909	7.8663306	8.517891	8.305674	6.41428	6.856237	9.614105	8.858386	9.174296
"A_23_P125726"	10.674536	11.769689	10.747494	11.563628	10.620963	10.735181	10.723135	10.727075	10.262564	10.055293
"A_23_P125748"	10.978657	12.137219	10.858625	12.4146595	11.061283	11.038482	10.773621	11.671756	11.873051	11.480746
"A_23_P125771"	5.5663104	6.271276	6.007125	6.0842214	5.685949	6.333508	6.3479395	5.0417933	4.7218947	5.4296923
"A_23_P125772"	8.664636	8.679013	8.208144	8.175233	7.9692163	7.5943594	7.8700485	8.185681	9.352317	9.221744
"A_23_P125788"	10.596712	8.596317	11.177793	7.406103	10.287958	10.63904	10.028133	10.516955	9.868433	10.370325
"A_23_P125809"	9.969498	11.178658	10.4023075	10.525701	6.1519794	11.061016	7.3084755	10.389779	8.620346	9.19775
"A_23_P125815"	12.365945	12.835919	12.390217	12.879862	12.4642725	12.570101	12.348826	12.293597	12.533497	12.242228
"A_23_P125829"	13.826244	15.01484	13.944927	14.903161	14.14716	13.8711405	14.843332	13.350439	12.916224	13.280821
"A_23_P125837"	6.9984136	8.398083	7.620182	8.180707	6.795492	6.6889405	6.8909	7.3555536	7.5025434	7.687842
"A_23_P125844"	1.8767909	3.130257	3.1746624	3.7678678	1.9948907	3.251226	3.3049192	2.9416578	2.4663095	2.2080479
"A_23_P125972"	2.1231394	2.6336458	3.4063644	3.0196247	2.8324065	1.6592506	3.8230708	1.609408	2.3605487	3.1088026
"A_23_P125977"	10.005669	8.442569	8.374855	7.2976813	9.496196	9.236009	9.274811	8.107919	8.777991	7.414108
"A_23_P125990"	4.1683607	5.1872573	4.794918	4.8639083	4.7784185	4.8408666	3.997878	4.288433	5.395105	5.5453925
"A_23_P126008"	10.5120945	10.8542595	10.555092	11.827991	10.663802	10.147321	10.471144	9.27266	9.301948	9.584691
"A_23_P12601"	7.2326326	7.635188	7.2485576	6.9156294	7.247403	8.166384	7.735934	6.8314815	6.226145	7.3575225
"A_23_P12603"	10.02132	9.95382	10.212897	10.102516	9.985236	9.889784	10.219542	10.140294	9.988855	10.020227
"A_23_P126031"	4.0519137	4.3768578	4.466207	4.3809624	3.6454687	4.5199976	3.7964697	3.180551	3.173685	3.4860296
"A_23_P126037"	9.182479	9.0035305	9.386989	9.466134	9.132875	9.364624	8.934428	9.526749	9.396076	9.376556
"A_23_P126057"	10.601693	10.882665	10.629158	10.687941	11.074867	10.797793	10.77216	10.98651	10.820065	11.052675
"A_23_P126075"	9.889363	12.465696	9.994529	13.140958	9.20237	11.69213	12.196564	12.245989	11.858288	12.262931
"A_23_P126089"	6.0383654	5.3333244	5.512368	5.377717	4.4347844	4.842742	4.667248	6.2237754	5.4599705	5.459782
"A_23_P126100"	7.5145826	7.4250917	7.586336	7.376125	7.077359	7.4003477	7.503868	7.049596	7.823903	7.531221
"A_23_P126103"	7.2162538	8.426804	8.169055	8.741332	8.35414	8.522215	8.093783	10.089018	8.269028	8.378705
"A_23_P126120"	4.269492	4.9241624	4.3503838	4.702779	4.249893	4.882023	4.847925	4.2770786	2.726372	3.9883235
"A_23_P126129"	9.125925	9.1188965	9.255514	9.141523	8.890444	9.275241	9.098583	9.313628	9.183403	9.422298
"A_23_P126135"	13.158882	13.252231	13.346007	13.248494	13.520173	13.658172	13.750172	13.210486	13.193446	13.007295
"A_23_P126159"	6.613165	7.830727	7.644226	7.4172044	5.1628766	4.896399	6.039087	7.7533555	6.7707376	7.14463
"A_23_P126167"	6.705919	6.9481487	6.4030914	6.867978	5.6682873	2.8924506	2.5302289	6.3204017	7.4827905	7.295266
"A_23_P126186"	11.332273	11.259993	11.367708	11.074594	11.366568	11.380276	11.414358	11.135384	10.6613455	11.291498
"A_23_P126197"	12.611188	12.268663	12.483887	12.463021	12.272657	12.02823	12.086361	12.2115135	12.254677	12.215922
"A_23_P12620"	7.4221964	8.307677	8.620346	8.567052	7.787175	8.265939	7.903724	8.169517	7.5735006	7.6924987
"A_23_P126212"	2.6721334	4.6799273	1.6709187	2.8585632	2.8308816	2.7386427	3.6355426	2.118461	2.3362617	2.5620522
"A_23_P126218"	5.7008443	6.1022468	4.3251266	5.2127676	7.3192663	6.089887	7.8003454	5.1057653	4.713001	4.474354
"A_23_P126225"	4.09998	4.403313	3.7737212	4.10108	4.9548793	4.8482666	4.2433643	4.8848867	4.6494956	3.8416617
"A_23_P126241"	10.846707	11.488208	11.182676	11.540988	10.888094	10.830912	10.268087	10.887785	11.361064	11.123929
"A_23_P126248"	2.0599725	1.8415614	2.0756214	2.5123558	2.0229912	2.3586333	2.162148	2.3989193	2.8587072	2.132401
"A_23_P126266"	5.0350876	3.6368215	4.450676	5.6002345	5.769956	3.447378	4.907973	5.4983416	4.756649	5.1515393
"A_23_P126278"	5.8993554	4.1494613	3.4974499	3.9100468	8.205773	4.387537	4.212766	3.2349966	3.62232	3.0984895
"A_23_P12628"	4.699862	4.914787	4.763273	4.8970313	4.811513	5.1598043	5.0166388	4.589368	5.892815	6.3581533
"A_23_P126291"	11.872649	11.955047	11.932564	11.987145	11.886819	11.885229	11.988027	11.939184	11.70928	11.995857
"A_23_P126298"	8.0692835	7.2817717	5.823113	5.4953823	8.410098	6.628066	8.980352	6.554389	4.153525	4.745992
"A_23_P126313"	2.879888	3.5816717	1.9125562	3.3031645	1.8361037	2.0440733	2.8585632	1.81585	1.7758867	1.8582937
"A_23_P126328"	4.859898	5.546157	4.7640953	5.285785	5.153779	6.0917816	5.1477275	3.1378698	2.6721334	4.2770786
"A_23_P126349"	3.8446577	4.0774035	3.5246139	2.6451936	4.039878	4.285809	2.8653736	2.8475277	3.954002	2.6430707
"A_23_P12635"	13.496338	14.1975975	13.82318	14.166723	13.629728	13.678675	13.627786	13.62553	13.7067	13.501497
"A_23_P126363"	2.803736	2.4034991	3.0106945	3.1077576	3.321409	3.5394459	3.133409	1.8187567	2.7616768	1.8156675
"A_23_P126388"	11.989027	12.253788	11.790876	11.761017	12.649393	12.415208	12.844952	12.001972	12.468239	12.617297
"A_23_P126393"	11.835815	11.086966	11.593824	11.290485	11.59191	11.590234	11.702731	11.2045965	11.18582	10.852162
"A_23_P126398"	8.891713	8.53197	8.6261635	8.485368	8.805638	8.982766	8.931311	7.849278	7.809922	7.7493973
"A_23_P126416"	8.786383	7.324756	7.9667263	7.3061414	8.446964	6.4771786	6.626534	8.721406	8.619251	8.825991
"A_23_P126426"	9.66174	9.530395	9.496196	9.611369	9.409543	9.5637	9.51157	9.608388	9.176891	9.135431
"A_23_P12643"	6.6491575	7.4419055	7.4789443	6.798504	7.632874	8.126189	8.147312	6.8987465	6.7185693	6.9547963
"A_23_P126448"	13.0233	13.876257	13.179705	13.704581	12.769165	12.829527	13.171836	12.567255	12.845774	13.082165
"A_23_P126457"	9.451156	9.5642805	9.417507	9.353614	9.387737	9.33448	9.152468	8.985867	8.976482	9.132695
"A_23_P126474"	14.467662	14.110886	14.139336	14.271853	14.419597	14.707414	14.690537	14.979241	14.957049	14.976889
"A_23_P126486"	12.139167	10.53652	11.181715	11.502965	12.085023	12.034082	11.955639	10.600004	11.003155	10.787228
"A_23_P126499"	5.654751	6.1321917	5.957277	5.3099504	5.044241	5.5014725	6.06159	4.871259	4.897307	5.211433
"A_23_P126528"	4.157838	4.5529594	4.03533	4.4788594	3.742201	4.446313	3.9963162	3.3939455	3.4572315	3.4069407
"A_23_P126540"	4.3459363	5.274838	3.135465	4.6129	6.9940586	7.2945933	4.6291213	3.7190144	1.9822611	3.6416974
"A_23_P126560"	2.3344095	2.2808554	1.59084	3.0839114	1.5870254	2.6572866	3.2851703	5.836609	1.5679625	1.6024152
"A_23_P126582"	4.5083017	1.8313323	3.7169065	2.8695035	7.275747	5.948155	5.210368	5.4188113	1.7363477	2.9960203
"A_23_P126584"	9.464361	1.9864013	3.1515718	4.211028	1.6949104	4.0996428	8.825135	2.3572485	1.5516372	1.6053089
"A_23_P126593"	10.987069	11.289864	10.750995	9.629179	10.906148	8.230228	9.13624	10.016654	10.990775	10.942446
"A_23_P126605"	6.329846	6.2799115	6.10831	6.0230927	6.1493163	6.3046308	6.191518	4.6983576	5.6725616	5.5670323
"A_23_P126613"	4.645487	4.8590946	4.675566	5.5540667	4.8738422	5.427679	5.904114	5.4886813	4.664345	4.479051
"A_23_P126623"	10.468461	11.212828	10.373008	10.301575	10.870348	11.031661	11.438231	10.23991	9.503854	10.090891
"A_23_P126649"	8.579876	9.4184265	8.368965	8.26997	8.76395	9.744276	9.646753	7.6729493	7.22817	7.5434613
"A_23_P126658"	1.9543812	1.6312826	1.700762	1.7531997	1.6953748	2.749434	1.6797969	2.7152166	1.6612713	1.7065866
"A_23_P126677"	6.209717	1.9167422	1.5929923	1.6697586	4.4442196	4.107608	4.2263503	1.5497625	2.0567794	1.5641233
"A_23_P126689"	8.785355	8.694424	8.623983	8.439004	8.31627	8.628152	8.805882	8.080465	7.7441874	7.6997437
"A_23_P126706"	5.0065417	3.8257556	3.7535357	4.239153	6.8813143	1.5551002	4.5374155	7.828626	5.1237597	4.9018555
"A_23_P126716"	15.037095	15.310429	15.43796	15.118083	15.456683	15.353789	15.579544	15.047883	15.511055	15.456683
"A_23_P126727"	8.530887	8.745517	8.797443	8.582843	8.765492	8.961253	8.930285	8.623252	8.515721	8.713027
"A_23_P126735"	5.2235756	5.129305	5.0586095	5.0216384	6.6581397	5.0525703	5.699076	4.5445786	4.3791447	4.9204164
"A_23_P126752"	9.380462	9.904012	9.744693	9.433816	9.74567	9.648409	9.466564	9.456588	9.721441	9.442128
"A_23_P126757"	8.9683	9.672073	8.930008	9.467062	8.872382	9.245525	9.172345	9.263876	9.642008	9.385125
"A_23_P126766"	5.834715	6.042317	5.464814	5.6456494	5.4420824	6.027309	5.7940855	5.456045	5.7318554	5.3242626
"A_23_P126782"	9.36393	6.9188757	7.2930145	5.9292274	8.533386	11.284373	8.248544	9.23512	9.425587	9.334825
"A_23_P126790"	12.772416	13.096461	13.0121975	12.640158	12.957858	13.034272	12.093994	12.382853	12.390217	12.45888
"A_23_P12680"	14.149793	14.588817	14.258351	14.616654	14.237133	13.8971405	14.330347	13.697009	12.57338	13.4107275
"A_23_P126803"	12.738719	12.85445	12.620531	12.898683	13.045759	13.211383	13.4465685	13.107456	13.789503	13.335796
"A_23_P126825"	7.6755824	8.942407	8.547944	8.560451	7.2087398	7.953107	6.341896	8.450829	7.980599	8.523251
"A_23_P126836"	6.4106727	7.0086703	6.5521965	7.4799485	7.8451614	8.459415	7.612491	8.121902	7.235268	7.5625873
"A_23_P126844"	12.712829	12.641638	12.897417	13.162426	12.485845	11.942683	11.666918	13.256916	14.302172	13.65966
"A_23_P12686"	7.6299353	3.2799687	3.4569674	4.013377	6.728769	1.8935913	2.5356112	7.952309	7.605503	7.541559
"A_23_P126869"	2.0625556	1.7729172	2.0839221	2.225569	2.307824	2.0787666	2.680422	1.9123852	3.1643715	1.9506797
"A_23_P126888"	10.697459	10.351095	10.395041	10.129219	7.6691127	7.6179366	8.155102	6.2931657	6.4043374	6.19021
"A_23_P126899"	10.75791	11.151646	10.909448	11.199167	10.683255	11.100302	11.044055	10.390043	10.280481	10.334081
"A_23_P126908"	11.30069	9.050672	9.169122	8.486455	10.502481	8.101061	10.895046	11.31575	11.509237	11.688017
"A_23_P126917"	2.7474535	4.4323044	3.5166147	4.088223	4.3926067	4.252996	2.1061826	3.733622	3.7046216	3.6345968
"A_23_P126939"	7.8154445	6.9990025	8.148305	7.03716	7.2653885	6.6376367	7.184808	8.29923	6.8123264	7.567021
"A_23_P126970"	11.868883	12.533497	11.91671	12.59557	12.604071	12.512099	12.996909	12.695849	12.10647	12.722585
"A_23_P126992"	10.099225	10.025745	10.184339	10.089018	10.142414	9.774697	9.954522	10.608559	10.607787	10.369778
"A_23_P127002"	7.4531703	7.192913	7.563563	7.2262316	7.2162538	7.564886	7.724185	7.22418	6.488936	7.0453534
"A_23_P127013"	3.7634645	3.4498296	3.5356715	3.5745013	4.8690424	4.7476053	4.9379525	4.939467	5.351717	5.5973573
"A_23_P127027"	5.1187487	4.020787	5.3198237	5.823333	5.629991	5.432258	3.2259767	6.9305253	5.957563	6.38658
"A_23_P127033"	10.177083	8.571271	8.699791	8.455587	9.983005	11.067585	10.69248	9.8194065	10.256472	10.376144
"A_23_P127054"	3.261437	4.36407	3.7524786	4.425001	3.5597067	3.8354948	4.459159	3.2510128	2.908044	3.662415
"A_23_P127068"	8.484743	9.19472	9.049192	8.76395	9.654495	9.329519	10.000065	7.349035	8.258858	7.8348036
"A_23_P127079"	10.206957	10.085558	9.928493	9.886414	10.016112	9.467396	9.643192	10.432443	10.322472	10.477443
"A_23_P127088"	11.228879	11.257045	11.20549	11.036303	11.183074	11.092038	11.28063	10.924134	11.195834	10.987069
"A_23_P127095"	14.989991	15.458223	15.511055	15.266853	15.274433	15.257742	15.588872	15.076298	15.231871	15.310429
"A_23_P127107"	4.4750366	1.6185473	2.250909	1.7548025	2.2166815	1.7249997	2.6776469	4.240383	4.5199976	5.3639135
"A_23_P127117"	10.169868	10.555391	10.29876	10.71182	10.415925	11.060648	10.651901	10.6982565	10.34776	10.806994
"A_23_P127128"	11.274507	10.703822	11.042709	11.038134	11.904481	11.758609	11.527684	12.078411	11.89015	11.9345255
"A_23_P127140"	8.956185	9.214474	8.880199	9.220768	9.03391	8.916049	9.265335	8.892303	8.972074	8.796415
"A_23_P127150"	10.942754	10.795081	10.913416	10.600843	10.838645	11.111995	11.042149	10.467911	10.188982	10.474679
"A_23_P127153"	7.1246605	7.7628837	6.935	7.9705744	7.9224157	7.835366	7.8282013	8.009558	8.644642	8.371576
"A_23_P127175"	10.9873	11.557402	11.565574	11.464368	11.434438	11.359666	11.835016	11.85778	11.791289	11.529354
"A_23_P127186"	10.663802	10.433039	10.822043	11.136249	10.955014	12.399453	11.762154	11.282225	11.196122	11.530838
"A_23_P127195"	10.044736	9.806158	10.083051	10.098283	10.525154	10.644298	11.10119	10.071235	9.984762	10.35262
"A_23_P127220"	10.479932	10.196395	10.575239	9.92421	9.764618	10.415138	10.844679	11.885507	11.732788	11.837856
"A_23_P127231"	3.4716082	5.134516	4.3243833	4.53064	2.9946249	5.0136695	4.106689	2.6649597	2.118461	2.2607436
"A_23_P127233"	10.966031	10.613718	10.947296	10.857669	10.676608	10.879313	10.689119	11.064633	10.576729	10.841053
"A_23_P127267"	7.605787	10.766512	6.5482287	4.48542	4.217622	3.6454687	1.9072896	10.82803	8.613541	9.196196
"A_23_P127279"	9.74567	9.834776	9.63693	10.096101	9.307235	8.898674	10.014684	9.986134	9.656302	10.013649
"A_23_P127288"	3.0038621	1.8612998	2.1710777	2.2740414	3.37023	2.0964112	5.2661166	1.8216717	1.7772981	1.8483115
"A_23_P12730"	6.459422	6.5460873	5.9590807	6.6024594	6.5733924	6.786624	6.5519953	5.569461	5.806734	6.4831395
"A_23_P127322"	3.0946496	3.8839102	4.249893	3.4876616	2.2433546	3.621236	3.0625708	4.5966563	4.100514	3.917004
"A_23_P12733"	8.780584	8.655784	9.002121	8.543281	8.519891	8.769479	8.6216955	8.080939	8.5084505	8.2622385
"A_23_P127339"	10.119548	9.510447	9.087087	9.023905	9.6353445	9.454332	10.457473	9.033014	9.302291	9.311474
"A_23_P127352"	1.9058315	2.7453928	2.7541015	2.7986267	2.4308586	3.9052896	2.8794127	3.0740297	3.2246237	1.7104588
"A_23_P127353"	13.373156	13.730508	13.665347	13.122559	13.456818	13.850369	13.730508	13.346687	13.493133	13.270686
"A_23_P127367"	12.349571	12.459619	12.218488	11.834654	12.75069	12.151469	12.537776	12.537776	12.6792	12.796753
"A_23_P127385"	5.767893	6.1096954	5.770845	5.8545823	6.5026803	6.22594	6.465203	7.3192663	6.395766	6.3648543
"A_23_P127394"	11.804428	12.090231	12.021736	11.785185	11.878463	12.199538	12.4236765	11.427244	11.513816	11.436356
"A_23_P127406"	6.5702386	7.039471	7.166418	7.3540506	6.5682616	6.985963	7.2076526	5.9632382	5.673974	5.7464366
"A_23_P127418"	1.8648612	2.895313	4.9654865	3.1915405	1.6598006	2.1020312	1.7043301	4.1206465	1.6535909	2.4257243
"A_23_P127426"	14.911637	14.541087	14.350982	15.035091	14.648935	13.903181	14.009541	13.040031	13.705606	13.540277
"A_23_P127438"	15.717113	15.500842	15.722539	15.404473	15.688292	15.853828	15.563939	15.771607	15.880311	15.717113
"A_23_P127446"	12.485845	12.443688	12.267179	12.597802	12.028803	10.82097	12.0088415	12.270142	11.459214	10.390296
"A_23_P12746"	9.069628	8.051005	8.491903	6.9380984	8.962419	9.01939	8.382942	7.5946	6.5475974	7.6490135
"A_23_P127460"	9.268446	8.478527	8.924121	8.108139	9.760895	8.451327	8.847894	9.088863	8.834178	8.709519
"A_23_P127467"	7.0898647	7.4316244	7.392463	7.252804	7.780304	7.7667427	7.8849545	7.133732	7.404584	7.346216
"A_23_P127475"	10.547496	10.380273	10.865569	10.379666	10.963461	11.095128	11.21772	10.070505	10.696923	10.170075
"A_23_P127484"	6.5519953	6.137706	5.89209	6.9699173	5.79458	6.80256	7.844514	7.166599	7.322755	6.7781644
"A_23_P127495"	6.272188	1.7178254	3.6432025	2.0468044	1.7467333	1.8598738	1.8598738	7.649357	8.925641	10.094498
"A_23_P127522"	8.702394	9.155431	8.778821	8.915245	8.23388	7.7752714	7.9281807	8.540255	8.095563	8.066234
"A_23_P127525"	6.188437	3.8170867	4.876715	4.7235737	5.3632684	3.9030864	5.456409	5.317255	5.380325	4.982819
"A_23_P127533"	10.25556	10.989437	10.667039	10.712609	10.727989	10.518971	11.510759	11.096264	10.866505	11.093164
"A_23_P127547"	3.708675	3.4102235	4.631615	4.7909236	4.182599	4.0505605	5.0870037	3.2703848	4.1168194	3.9021692
"A_23_P12755"	5.668639	5.585833	5.3010683	5.5284185	5.0590997	5.217919	5.405019	5.4265833	5.313641	5.181066
"A_23_P127553"	5.690066	5.921951	6.3003864	6.233925	6.1711674	6.3555307	6.2561584	5.2036343	3.938652	5.3625336
"A_23_P127557"	8.963181	9.031464	9.185005	9.15335	8.641354	9.016395	9.098111	8.691014	9.567153	9.112034
"A_23_P127565"	8.835331	6.9469724	8.680793	9.134053	8.744587	5.612791	6.8841205	9.262446	9.248401	9.447441
"A_23_P127579"	12.448944	12.951221	12.839615	12.917864	12.589496	12.646656	12.745897	12.130164	12.247088	12.548653
"A_23_P127584"	9.852165	5.1572685	7.5428777	6.9116597	13.462674	6.965667	8.705669	10.359997	7.101964	7.5195503
"A_23_P127596"	3.9892764	5.620156	4.5092196	4.9239497	4.4398394	5.128759	4.745753	3.6379821	3.8490093	3.8614135
"A_23_P127608"	3.8409142	5.048771	3.8240857	4.766881	6.1140704	4.882501	5.5604734	3.6814115	4.18363	4.456643
"A_23_P127613"	11.562764	12.075235	11.818617	11.684106	11.107171	11.7562685	11.540398	11.543808	11.657027	11.642218
"A_23_P127627"	9.348787	9.342776	9.219203	9.188955	10.157822	9.548134	9.566934	9.106197	9.519154	9.285937
"A_23_P127642"	11.1100025	11.171302	11.216704	11.29687	11.032253	10.706086	11.212431	10.243116	10.063011	10.499546
"A_23_P127652"	7.3467445	6.892121	7.2928514	6.786624	7.1246605	7.3722315	6.9668264	7.1204033	6.9195023	7.092718
"A_23_P127662"	1.7496021	2.1545575	1.9632858	3.9521227	1.8343853	2.1077857	2.016803	1.8256658	1.7826984	1.8626328
"A_23_P127663"	7.7710896	8.1516075	7.3448205	8.230228	6.6501646	8.795751	9.114604	8.086042	8.249932	9.075489
"A_23_P12767"	1.8234608	7.099285	3.6858196	5.060278	1.7578745	2.719189	1.5266247	1.7880281	1.628052	1.5046858
"A_23_P127676"	10.933948	10.886303	10.990991	10.787554	10.622272	10.946519	10.716968	10.767145	10.661125	10.899904
"A_23_P127684"	5.002073	5.229625	5.065619	5.277065	4.9702554	5.4886813	5.135115	4.657541	5.1631866	4.6182833
"A_23_P127697"	5.0011196	5.1321416	4.940239	5.200068	5.011968	5.6692886	5.527871	4.6332464	4.321759	4.1160436
"A_23_P127721"	6.570516	6.863454	6.15667	6.4749317	5.9381704	6.473613	6.446404	5.9230604	6.4590726	6.015918
"A_23_P127727"	6.915453	5.4903555	5.4702487	5.593749	6.525369	5.802784	7.1517386	5.603703	6.4022017	5.63115
"A_23_P127760"	1.7305018	1.7375859	1.8687363	2.1316657	1.8015738	1.9615812	1.8934747	1.7854954	1.7508361	1.8206711
"A_23_P127781"	4.7144403	5.245379	4.927056	10.286507	5.0370865	8.943657	6.866926	8.875723	8.516819	9.193694
"A_23_P127789"	9.179152	8.408826	8.4613905	7.3350725	10.053585	6.7185693	8.63867	9.941426	9.85299	9.435259
"A_23_P127793"	7.8982496	6.731759	7.674722	7.4433565	7.6066146	7.2780714	7.57099	6.9266334	7.150565	6.772281
"A_23_P127805"	8.606669	7.871121	8.463075	8.097827	8.977012	8.498608	8.232491	8.532097	8.895484	9.606133
"A_23_P127818"	8.445993	4.3693624	6.988314	5.655276	3.9492214	9.520248	6.6835155	6.6460786	8.553633	7.760508
"A_23_P127824"	4.3181233	4.126871	4.433775	3.8902514	4.453428	4.7888227	4.971663	4.310917	5.096248	5.6673884
"A_23_P12784"	10.6438055	10.724068	10.070826	9.925593	9.900667	10.989437	10.526516	9.159718	8.766842	8.961626
"A_23_P127840"	5.403024	4.547201	5.6619434	6.1232405	4.6831117	4.3209977	4.438444	5.997131	5.5411406	5.5207458
"A_23_P127851"	9.076295	9.387188	9.623474	9.574718	9.111654	9.260565	9.580594	9.483511	9.81156	9.80426
"A_23_P127868"	6.122996	6.003597	5.4945974	5.2239733	5.261441	5.3076477	5.107638	5.057035	5.385475	4.837677
"A_23_P127879"	6.9266334	7.605503	6.9380984	7.531221	7.2417135	7.1877723	7.1335654	7.169085	7.457352	7.312765
"A_23_P127891"	2.5936	2.1235	2.1666884	4.781744	5.1528635	9.273636	1.8874176	6.407984	5.4753222	6.780046
"A_23_P127911"	6.901386	6.628495	7.2436824	7.1077466	5.1974993	1.6853052	5.9192734	9.252995	8.740527	8.450829
"A_23_P127915"	10.379105	10.108979	10.308069	10.061267	10.651901	10.657072	10.3176155	10.02088	10.281244	9.899096
"A_23_P127926"	5.6051226	6.952309	5.334734	6.3431945	6.2943687	6.5392976	7.03716	5.473316	6.0069323	6.2748
"A_23_P127948"	9.299867	11.607874	9.890935	11.136433	9.334825	8.942204	10.0315895	12.997854	8.608358	10.424263
"A_23_P127957"	5.087515	4.8034415	5.448813	7.2404294	7.7331204	6.5458174	5.717513	7.3910036	7.0089083	6.664381
"A_23_P127964"	14.271853	14.211462	14.102296	14.1975975	14.765815	14.264835	14.562853	14.074731	14.334292	14.289549
"A_23_P127978"	1.5307328	4.1888504	1.5280259	1.5350193	1.5173512	1.5178144	1.5315914	1.562173	1.5437305	1.5423436
"A_23_P127995"	12.794063	12.898683	13.071756	13.052734	12.7798605	12.683234	12.799362	12.601392	12.63586	12.672932
"A_23_P1280"	8.733292	8.683273	8.876548	8.350249	8.5476055	8.861737	9.2832	8.931112	8.267722	8.954806
"A_23_P128008"	6.0770564	5.6273437	5.052861	5.412857	4.598136	4.880606	4.549847	5.5029206	6.5604753	6.9136553
"A_23_P128023"	2.5404823	2.9689667	1.6492875	2.822481	3.0507402	3.9372149	1.6354003	4.6117725	2.0293646	1.6937301
"A_23_P128036"	8.754966	8.9573	9.135756	8.619563	9.15585	9.37622	9.262054	8.489117	7.612012	8.442725
"A_23_P128050"	3.6069286	2.679939	3.8775349	2.9841096	4.729122	2.8200517	3.4039006	2.8320448	3.971158	4.027399
"A_23_P128060"	9.330833	8.880596	9.199086	8.766842	9.008584	8.952826	9.251712	9.507495	9.184151	9.146483
"A_23_P128067"	17.187782	16.956614	17.357811	17.260965	17.149849	17.634254	17.149849	17.269207	16.836046	17.187782
"A_23_P128073"	13.956216	13.878323	13.838291	13.886492	13.797441	13.859092	13.924521	13.537145	13.647155	13.576739
"A_23_P128084"	12.024012	10.106574	10.514961	11.149238	13.083214	13.577628	12.529002	12.108456	11.997288	11.42009
"A_23_P128094"	6.525369	6.9224024	6.960685	6.371332	6.4210515	7.3698535	7.0944476	5.9134474	6.1763515	6.1042776
"A_23_P128126"	8.490611	8.629135	8.819354	8.523251	8.668211	8.534737	7.976393	8.304755	8.112423	8.575733
"A_23_P128147"	15.246796	15.326196	15.364556	15.185077	14.620554	14.5302515	14.802088	14.469018	14.95071	14.683
"A_23_P128154"	14.733835	14.795576	14.909791	14.72451	14.108869	14.105691	14.297805	13.949157	14.39587	14.039762
"A_23_P12816"	6.330698	7.359245	6.9254727	6.678651	7.274556	7.339226	7.8137503	6.057706	7.199288	6.722604
"A_23_P128161"	12.401754	12.4642725	12.452433	12.263684	11.506815	11.6235285	11.672431	11.086966	10.704683	11.388825
"A_23_P128166"	10.651511	10.86955	10.715713	10.76871	11.017608	11.04309	10.8570175	11.314003	10.5259	11.055392
"A_23_P128174"	12.23782	12.777392	12.526713	12.148307	12.887982	12.70962	12.46025	11.977852	12.322229	12.245989
"A_23_P128192"	13.52284	13.12027	13.349129	13.138174	13.15474	13.611266	13.2949095	13.638331	13.569985	13.429778
"A_23_P128201"	5.181066	5.656522	4.41016	4.275329	6.1281395	5.221608	4.5830655	4.5101633	3.617436	3.791354
"A_23_P128215"	12.572792	13.319128	11.627606	11.376226	11.259993	12.855491	13.3037615	12.137219	12.625534	12.681835
"A_23_P128230"	9.299648	10.844679	8.232242	10.273577	13.393298	8.192486	11.704665	14.161101	14.6352625	14.070402
"A_23_P128235"	1.9005326	1.5813243	1.623182	3.026689	1.57883	1.6256487	5.4668255	1.5864438	1.5605055	1.5939604
"A_23_P128246"	10.9475765	11.070343	10.424374	10.998902	10.736391	11.390606	11.63344	11.752596	11.566532	11.895016
"A_23_P128254"	1.7560977	1.5820384	1.6064398	1.6344714	1.6071992	1.6384887	2.9167027	1.6458006	1.5967829	1.6246891
"A_23_P12826"	7.6646085	7.505365	7.693655	7.1405754	6.996244	7.779525	7.4314065	5.767893	6.890618	6.4816504
"A_23_P128263"	3.4006011	2.5404823	3.0865827	4.770934	2.5279362	2.9801745	2.4565723	3.2673824	3.3203218	3.3650627
"A_23_P128281"	1.7048765	1.6635911	1.7316191	1.7413247	1.7087921	1.7534595	4.220302	1.7829329	2.0225706	2.3985257
"A_23_P128304"	7.698834	7.878867	7.8951826	8.040935	8.11959	8.303292	8.05052	8.239228	8.139197	8.220679
"A_23_P128319"	9.696687	10.0305195	11.070104	10.424374	10.32901	10.2040615	10.002684	9.340471	9.703141	9.9452095
"A_23_P128323"	7.151305	4.0600996	5.6388063	4.1846075	4.252996	3.3228426	4.2142625	7.5019608	7.916091	7.8920684
"A_23_P128337"	12.638434	12.102838	11.986605	12.050732	12.478669	12.302335	12.43706	12.458151	12.192147	12.000287
"A_23_P128351"	1.5941546	3.5576923	3.4012518	2.8827062	1.6455208	3.6664712	3.2104363	2.497898	2.224204	3.1624658
"A_23_P128362"	3.568635	3.3781998	3.62674	2.0938892	3.346523	2.9887173	2.7541015	2.353756	2.7477083	2.935171
"A_23_P128372"	10.252805	10.308069	9.977777	10.316281	10.257469	10.15369	9.623315	10.394063	10.430786	10.389779
"A_23_P128375"	11.87992	11.61699	11.369822	10.350482	9.11513	10.034209	9.300956	11.817859	11.3921795	11.36138
"A_23_P128384"	10.362258	10.4874325	10.379666	10.291855	10.586513	10.361192	10.629861	10.0730295	9.99556	10.149302
"A_23_P128396"	10.818611	10.916117	11.025079	10.887095	11.049904	11.238915	11.349343	10.934882	10.476734	10.862109
"A_23_P128408"	8.748222	8.754966	8.917206	8.851881	9.161544	9.327402	9.428094	9.214256	9.365383	9.454332
"A_23_P128436"	10.8135	11.003549	11.053047	10.959094	10.622003	10.707026	11.064633	10.770832	11.033954	11.047411
"A_23_P128447"	7.648308	7.401571	6.7537894	7.1568046	6.42872	4.24868	6.704999	7.7370677	7.0920963	6.9940586
"A_23_P128470"	3.5590281	3.462123	1.5824708	3.7651758	4.540967	4.1769805	4.009486	2.5454912	3.2638905	1.9737743
"A_23_P128486"	8.743194	8.844976	8.834532	8.672388	9.715233	10.961062	11.913897	9.050852	9.382942	10.300159
"A_23_P12849"	8.976082	9.278754	8.96493	9.07454	9.332424	9.518943	9.726719	8.953737	9.050243	8.943919
"A_23_P128503"	1.9868532	2.1955776	2.8161626	2.3506732	1.9506797	3.3049192	2.654471	1.9654775	2.8794127	2.40851
"A_23_P128532"	9.061569	9.909137	9.544652	9.571445	9.116927	9.533398	9.401783	9.827577	10.060484	9.894703
"A_23_P128541"	7.47034	7.8534837	7.6021943	7.41841	6.999763	7.256922	7.1793385	6.3314657	5.7165604	6.3114057
"A_23_P128543"	12.005999	11.326546	11.989027	11.810885	11.8369	11.9420185	12.123336	12.1744	12.292906	12.206687
"A_23_P128554"	10.902597	11.097602	10.886303	10.97256	10.761383	10.478679	10.388771	11.73986	11.390272	11.222597
"A_23_P128574"	9.463578	9.690819	9.692316	9.170757	9.482872	10.443429	7.0317583	8.7115345	9.264276	9.810108
"A_23_P12858"	6.1833105	6.526019	6.126476	6.388995	5.8563776	6.3826056	6.155177	5.9381704	6.5536847	6.0584435
"A_23_P128587"	14.435916	14.704575	14.514371	14.559146	14.391322	14.446257	14.616654	13.984848	13.955164	14.110886
"A_23_P128598"	9.39036	9.316381	9.611191	9.497433	9.633179	10.411268	10.279011	9.319494	9.1311455	9.474819
"A_23_P1286"	8.894462	2.307441	5.7626367	6.749463	3.7369535	2.881489	2.261855	7.828495	7.9135633	9.127744
"A_23_P128609"	2.1069624	2.7774558	2.178448	2.6821277	2.496426	3.1857555	2.268808	2.2819557	2.6897473	2.2873814
"A_23_P128613"	7.1429687	6.8612375	6.8304896	6.966216	7.6463876	7.380531	7.564759	7.356877	6.798504	7.0873914
"A_23_P128624"	13.722861	13.2997465	13.68396	13.757383	14.230412	13.754343	13.782254	13.798161	14.166723	13.876257
"A_23_P128641"	8.06965	8.042553	7.8627067	8.251386	8.060719	8.249832	8.105979	7.7553205	7.4677477	7.951492
"A_23_P128650"	7.551229	7.954851	7.9918118	7.674722	7.5488596	6.8663344	8.134385	7.282655	6.9344177	7.3711395
"A_23_P12866"	8.027565	8.600112	8.561203	8.3575	8.134506	8.457757	8.422225	8.212247	8.002238	7.758004
"A_23_P128663"	9.784638	9.340471	9.721026	8.828033	8.667679	8.034165	6.1818027	10.659991	11.321457	10.844384
"A_23_P128698"	8.779229	8.2364435	8.079197	7.920061	9.597508	7.769063	8.237215	10.187258	8.9822645	8.991095
"A_23_P128706"	13.381145	13.419129	13.389806	13.392536	13.51131	13.563763	13.768517	13.609911	13.713371	13.403736
"A_23_P128728"	8.422419	9.30583	9.72596	11.11302	7.704941	8.494628	7.2084665	9.634793	9.593769	10.021829
"A_23_P128734"	13.208761	13.138174	13.360606	13.121878	12.85445	12.90914	12.984094	12.970272	13.37397	13.080064
"A_23_P12874"	10.772952	10.935975	10.906148	10.808586	10.723844	10.612816	11.039219	10.864291	10.5462885	10.934287
"A_23_P128744"	4.3713427	4.546473	4.4520073	5.297384	5.2422576	4.4905705	5.697614	4.4788594	4.4979553	4.032709
"A_23_P128759"	4.7123914	2.8008184	2.2375855	1.8313323	2.3198237	1.8530754	3.8724518	1.9980228	1.5118539	1.509076
"A_23_P128773"	9.831326	10.11128	9.951737	10.252691	9.816227	9.993951	9.927945	10.240863	9.989434	10.04197
"A_23_P128783"	11.438715	11.350683	11.448963	11.274698	11.219887	11.188381	11.123929	10.9509945	11.0634575	10.950473
"A_23_P128808"	5.0653744	5.288092	4.2052355	4.167786	6.111418	4.9342947	5.690066	4.855659	4.890168	4.8739953
"A_23_P128817"	7.520995	8.004263	7.3980455	6.7654076	9.351024	8.61742	8.718215	7.296659	6.575622	6.676895
"A_23_P128828"	13.36693	13.947643	13.950583	13.807865	13.145942	13.731705	13.68909	13.172782	13.231788	13.363159
"A_23_P12884"	10.377004	9.984762	9.520766	9.344007	10.6531725	10.443891	11.2909975	10.77517	10.094376	11.393163
"A_23_P128855"	5.0327187	4.1955857	5.3375077	4.4931846	4.7342043	4.613108	4.806767	4.749294	5.31506	4.8521886
"A_23_P128868"	1.5841875	1.5822396	1.586337	1.6108683	1.6424481	1.5762625	1.5877988	1.6315888	1.585196	1.6231338
"A_23_P128887"	6.423787	6.6384234	5.9520574	6.4980116	7.264015	7.4492908	7.4235954	6.6627555	6.3442063	6.4141216
"A_23_P128897"	1.5954661	1.5943421	1.6829795	1.6603494	1.7732399	1.7401761	1.620383	1.6728419	1.6253408	1.6905203
"A_23_P128911"	5.149189	5.3997245	5.1611366	5.2691884	4.583427	5.38443	4.9179068	5.5402546	5.465783	5.719084
"A_23_P128919"	12.78808	10.69777	10.483446	9.969818	12.955005	8.163545	10.695506	13.168724	14.183383	14.102296
"A_23_P128930"	11.368515	11.632201	11.644419	11.710476	11.446883	11.540988	11.548414	11.27129	10.92511	11.318995
"A_23_P128940"	7.859256	7.595663	7.7355323	7.572447	8.291655	8.67439	8.252726	8.041329	6.90202	7.6673255
"A_23_P128956"	10.113525	9.802673	10.321021	10.235919	9.71863	9.880205	9.968135	9.892248	9.541492	9.500166
"A_23_P12896"	9.740513	9.840744	9.471246	9.942344	9.83616	9.939641	10.147843	10.572042	10.753483	10.42616
"A_23_P128967"	8.786803	9.158669	9.247609	9.459933	9.227753	10.000992	9.340252	9.79584	9.813457	9.758133
"A_23_P128974"	7.982486	5.785048	6.0785437	5.3452387	8.981757	5.7721972	7.83575	6.335882	6.577565	5.7702293
"A_23_P128991"	13.681018	13.944927	14.013799	13.729331	13.545356	13.521322	13.662816	13.458948	13.652708	13.179705
"A_23_P128993"	8.1210985	6.3846207	7.038714	6.3774114	8.66803	5.9689665	8.667679	7.28485	9.726315	9.630514
"A_23_P129005"	8.735972	8.569179	8.5937	8.189579	7.560999	7.7099233	8.158393	7.4039035	6.717111	6.752871
"A_23_P129014"	8.592979	9.157971	8.786089	8.822052	8.290986	8.36735	8.88419	7.349338	7.7225575	8.093621
"A_23_P129031"	8.354284	8.201684	8.27243	8.290877	7.9165516	8.175651	8.519891	8.304119	8.175802	8.260232
"A_23_P129038"	8.175388	8.425559	8.146199	7.6643963	7.2666483	7.4981513	7.570354	7.4630094	7.708336	7.594204
"A_23_P129058"	9.801902	9.631876	9.930926	9.606133	9.513276	9.70787	9.5637	9.8959255	9.50229	9.800793
"A_23_P129064"	9.195728	7.758341	8.343193	6.873953	10.9699	10.781114	10.805975	10.431607	10.174589	10.256472
"A_23_P129075"	4.3113494	5.127396	3.9808083	3.4181006	4.524668	5.353645	4.867609	4.3074408	2.8337886	3.3366618
"A_23_P129085"	3.7453685	3.3922887	5.8181863	5.1653223	3.3537064	3.3817253	2.3447337	6.201992	4.723891	4.7025113
"A_23_P129101"	11.42414	12.086361	11.74257	12.334608	11.497171	11.519324	11.998369	11.531247	11.497171	11.701422
"A_23_P129103"	11.49583	11.353413	11.00177	11.380276	11.794058	12.0681	12.800168	11.774002	11.470788	11.24565
"A_23_P12911"	9.258466	9.119526	8.959769	9.297238	9.760274	8.557511	8.828033	9.876417	9.915024	9.625837
"A_23_P129118"	10.096489	10.079295	10.125404	10.027829	9.805959	9.942344	9.723919	10.2908945	10.154815	9.980047
"A_23_P129128"	7.5752363	7.6577644	7.656607	7.7468643	7.056665	7.4470453	6.9940586	7.904457	7.593877	7.4581375
"A_23_P129133"	7.4742527	5.2580485	2.7552855	7.599534	2.1403859	1.8340487	2.2650247	6.7656946	5.100099	5.9383636
"A_23_P129144"	4.069328	1.6262621	2.702688	1.8120973	3.3002565	1.7411263	1.7167041	5.077275	4.8389215	5.6424594
"A_23_P129157"	11.32908	10.851454	11.0725765	11.177464	11.173323	11.102038	9.505523	11.545542	11.415367	11.271856
"A_23_P129169"	9.966307	9.44646	8.863414	8.405836	6.789175	5.7844906	7.265181	6.873684	6.3884673	6.425461
"A_23_P129174"	11.873051	11.9345255	12.057575	11.898748	11.836391	11.8699665	12.24372	11.64821	12.196564	11.780965
"A_23_P129188"	9.663423	7.8719506	8.44663	9.321158	11.188812	11.175733	11.93952	8.996359	9.704401	9.599471
"A_23_P1292"	6.569332	6.5546584	6.539022	6.6627555	6.4453554	7.0132756	7.3606524	7.3254976	7.242406	6.884703
"A_23_P12920"	4.845862	4.441535	4.1255856	4.212766	4.7656326	4.9608946	5.6881714	4.1763372	4.38729	4.4573874
"A_23_P129209"	8.935257	8.37688	7.4603252	8.479656	9.186846	8.060033	8.379025	8.822185	8.886957	9.038906
"A_23_P129221"	9.013622	9.670895	8.864473	10.340514	7.7502956	7.860852	8.413177	10.089376	9.311323	9.156739
"A_23_P129225"	1.8713073	1.8987098	2.1780896	2.7036269	2.0922499	2.5279362	2.2786198	2.1846623	1.9189782	2.2883763
"A_23_P129246"	10.06608	8.428764	9.470087	9.19202	10.014098	7.8348036	8.8477	9.327402	8.691852	8.40689
"A_23_P129258"	11.942683	12.2681	11.776061	11.932564	11.841009	11.603118	11.87992	12.329867	13.057489	12.317033
"A_23_P129279"	7.509963	7.8982496	7.9283824	7.582004	6.796432	7.140802	7.577787	7.5785556	8.289868	7.8489385
"A_23_P12928"	1.59289	1.613544	1.6716111	1.7813399	1.623317	1.6911608	1.7063985	1.6340172	1.5977648	1.6112529
"A_23_P129291"	2.0139985	1.7699007	1.5522357	1.5452973	1.7767961	3.247023	3.3178604	2.1911454	2.6794388	2.887665
"A_23_P129301"	7.29997	7.89098	7.656943	7.555345	7.786064	8.154244	8.310254	7.766046	7.6994743	7.733738
"A_23_P129312"	3.498382	3.7781732	3.8711038	4.26916	4.2433643	3.975523	3.4071627	2.879888	4.031488	3.2196527
"A_23_P129313"	10.411268	11.016619	10.553181	10.3383255	10.502981	11.310416	10.480531	10.070319	9.764618	10.247784
"A_23_P129322"	7.316842	7.9741893	7.557022	7.365227	7.209595	8.310939	7.4166923	6.7816544	6.2909217	7.193098
"A_23_P129332"	1.4911122	1.4906424	1.4928712	1.4923564	5.1013446	1.4959987	1.4912161	1.4989136	1.4906424	1.5013089
"A_23_P129334"	9.442866	9.310007	9.900972	9.171546	9.545717	9.63865	9.983005	8.916965	8.883341	8.863414
"A_23_P129358"	9.802217	10.556656	10.382128	10.464797	9.962631	10.440727	9.959153	10.551789	10.116958	10.318503
"A_23_P129367"	5.0550065	3.4930046	2.5562317	4.048485	4.48341	3.2876773	3.6050642	4.8698335	3.9892764	3.9878364
"A_23_P129382"	3.9630916	4.592589	4.624859	3.969449	3.4210227	3.6493657	3.012156	3.9548671	4.492107	4.237478
"A_23_P129389"	9.788829	9.801335	9.827577	9.832482	10.067176	10.117239	10.114584	9.737951	9.421334	9.552011
"A_23_P129405"	13.480442	13.729331	13.498762	13.124051	13.024603	13.096461	13.280821	12.751591	12.612455	12.59557
"A_23_P129413"	9.589385	10.131037	9.421334	9.639895	9.004569	9.505035	9.368387	10.23047	10.99286	9.90139
"A_23_P129425"	8.629135	8.059128	8.068331	8.769009	8.396386	8.656856	8.557302	9.002464	9.22781	8.550222
"A_23_P129433"	8.0253315	7.077171	8.237421	7.135318	7.8477416	9.047923	8.33135	8.717757	7.7736073	7.801784
"A_23_P129443"	3.5973492	2.67641	3.8707952	2.7914472	2.8008184	3.3585062	3.5138378	2.113199	3.2192492	2.4165058
"A_23_P129458"	8.825135	9.169954	8.95753	8.579046	7.966144	4.727942	2.2664604	7.910096	8.559642	8.38562
"A_23_P129466"	6.1433854	7.3638463	6.4706926	9.2852	9.579858	4.8547006	7.930639	8.297291	9.126203	9.07059
"A_23_P129476"	11.073571	10.966031	10.777927	10.754636	11.026245	11.226383	11.659375	10.4464655	10.833991	10.604311
"A_23_P129486"	9.992874	9.621037	9.647418	9.342017	10.473711	10.270583	10.231245	9.772325	10.184905	10.227236
"A_23_P129492"	8.50712	8.212721	8.199402	7.8659725	8.964296	8.932509	8.843629	7.9985247	7.85338	8.47214
"A_23_P129496"	6.1211753	4.9382772	5.5354085	5.32662	6.0840797	4.621902	5.085658	5.068329	4.3843064	5.0187707
"A_23_P12950"	7.5082	7.820542	7.76528	7.5061736	7.6075425	7.938724	7.8546615	6.908036	6.0736556	6.57003
"A_23_P129513"	11.60375	11.91671	11.788326	11.390272	12.421696	12.362022	12.639131	10.845047	11.576212	11.405068
"A_23_P129556"	10.600204	8.833403	9.663423	9.314233	11.145246	8.356818	9.699181	10.629544	10.269759	10.3619175
"A_23_P129569"	7.036693	6.572339	7.3740206	6.6460786	6.3776507	6.9292836	6.776163	6.376061	6.1896167	6.1122894
"A_23_P129577"	7.157304	7.57266	7.3451777	7.416055	6.2898955	7.4371133	7.010848	8.033428	7.305243	7.5870414
"A_23_P129587"	6.6960707	6.7816544	6.9654245	6.7437577	6.5378966	6.8894777	6.454316	6.4282722	7.345529	6.301569
"A_23_P129602"	6.1387663	6.438142	4.094157	3.8125927	4.4646645	5.245035	5.1528635	3.8432379	4.941003	4.443622
"A_23_P129606"	5.160905	5.8048196	5.966963	5.405019	5.7196927	6.0381713	6.213988	5.526063	5.539864	6.0126224
"A_23_P129614"	10.42864	10.805454	10.379863	10.641409	10.440075	10.629158	11.107759	10.8224945	10.785872	10.71998
"A_23_P129629"	14.804164	14.493412	13.852982	13.527115	11.363018	11.793379	11.692644	13.878323	13.240232	12.656118
"A_23_P12965"	7.829673	7.6036444	7.670331	7.500335	7.4003477	7.4433565	7.8288226	7.3251944	6.471623	7.261574
"A_23_P129659"	9.058861	8.886179	8.828267	8.641111	8.936278	9.413473	9.170107	8.636364	7.7675767	8.568938
"A_23_P129665"	4.7121725	1.6956822	1.7620087	1.8956828	4.1419787	3.2331364	5.9896054	1.7844439	1.697773	1.7949867
"A_23_P129678"	7.7544	7.595943	7.7525682	7.4917	7.653584	8.087398	8.2892475	6.851493	6.3579164	6.650698
"A_23_P129695"	8.772516	5.3490696	8.592312	8.041949	9.532772	5.2047024	6.7497406	10.12303	9.18519	9.1138115
"A_23_P129704"	13.92359	14.19378	14.559146	14.289549	13.907283	14.449758	13.761595	14.241349	14.358568	14.05023
"A_23_P129717"	4.405676	4.252996	3.7761292	4.5146346	3.4185643	4.9740443	3.8647285	2.940648	3.613465	3.2147067
"A_23_P12972"	1.4894664	1.4894664	1.4893652	1.4938759	1.4870079	1.4888536	1.4914056	1.4907204	1.4898835	1.4900608
"A_23_P129738"	8.889096	7.663142	8.921122	7.8355803	8.450202	10.140097	9.533491	7.994781	8.777207	9.214256
"A_23_P129754"	5.238024	4.783655	5.2604685	4.3777404	4.9342947	6.962691	6.424436	4.18363	4.395948	4.2516594
"A_23_P129778"	6.960685	6.6227093	6.8808618	6.815206	6.673585	7.320502	6.701019	6.7931514	6.702161	5.9835386
"A_23_P129786"	14.440421	16.433071	14.779451	15.925797	17.106247	16.77017	16.950897	12.933683	14.080139	13.260142
"A_23_P129801"	11.352474	11.103977	11.319514	10.743635	10.665147	10.82803	11.127121	10.931597	10.527886	10.519472
"A_23_P129821"	5.207376	6.005809	4.8045397	5.2781363	4.5101633	5.5143456	5.0187707	5.1290083	5.0827703	5.527871
"A_23_P129829"	14.474334	14.412739	14.5680275	14.618458	12.749471	12.722585	12.906604	13.90612	13.730508	14.012111
"A_23_P129835"	7.322755	4.0701084	6.3556724	3.822658	4.088771	6.447546	3.383871	5.6136274	6.3471303	5.285785
"A_23_P129856"	6.9123974	5.8625245	7.458502	7.039151	7.499345	5.417907	6.4886484	8.020636	6.719079	7.5198736
"A_23_P129871"	1.7548025	3.0724294	2.8448436	2.8363905	1.8447845	3.047391	3.1533165	2.3672624	2.8112495	2.7921844
"A_23_P12989"	14.031049	14.865587	14.469018	14.514371	14.401899	14.481879	14.640011	14.221302	14.498646	14.601235
"A_23_P129896"	11.451686	11.067278	11.096554	10.830221	10.822689	11.009567	10.593004	11.344893	10.774687	11.0462475
"A_23_P129903"	7.896411	8.386803	7.7265964	8.171948	7.9406137	8.093004	8.366917	8.543281	7.8703117	7.8953753
"A_23_P129916"	2.6745217	2.0207708	1.8510157	2.8883903	3.286075	1.9287455	2.8424153	2.3837428	4.1026864	4.1710067
"A_23_P12992"	14.515767	14.489377	14.822923	14.426406	14.474334	14.6352625	14.845519	14.337876	14.570824	14.483873
"A_23_P129925"	8.248341	6.640264	7.857273	7.071322	9.843918	6.6102076	7.9570355	10.185106	7.4367704	8.88419
"A_23_P129935"	9.311924	9.355135	9.460744	9.2619	10.069393	9.543855	9.811752	9.64532	9.213136	9.533398
"A_23_P129956"	9.999837	10.879545	10.431192	10.448441	10.794744	10.617428	10.714756	10.528209	10.399619	10.740321
"A_23_P129967"	5.3665476	6.3074446	5.422792	5.220051	5.924947	5.6969066	5.200468	3.8503687	4.87859	4.489182
"A_23_P129989"	11.296519	11.434438	10.907417	11.0462475	10.88077	11.121362	11.086659	11.370291	11.440817	11.362661
"A_23_P129996"	9.707081	9.7167635	9.676818	9.509116	9.475095	9.552284	9.619691	9.28262	9.178318	9.532772
"A_23_P130020"	10.394371	10.829426	10.898173	10.601927	10.625078	10.5135355	10.407144	10.604311	9.925848	10.291306
"A_23_P130027"	10.4464655	6.681593	10.673989	8.45626	4.3739486	2.2325418	4.9743037	4.1141844	6.79346	6.8658915
"A_23_P130040"	11.021227	10.885456	11.244742	10.692998	10.542068	10.877699	10.608559	10.63607	10.383515	10.7396755
"A_23_P130056"	2.4857254	2.2853224	2.3985257	1.6018882	1.9208162	2.6709094	1.5691905	1.661392	2.2141669	1.8281003
"A_23_P130064"	11.84381	12.299227	11.955047	12.214837	12.345701	12.174841	12.592543	12.24372	12.377627	12.17968
"A_23_P13007"	3.6748574	3.3517256	3.7333167	2.8011088	2.796467	4.059317	2.6366072	2.8973844	2.9960203	2.4034991
"A_23_P130089"	8.965026	10.043953	9.089976	9.822428	9.302793	9.502501	9.715545	10.118944	10.431192	10.161642
"A_23_P130107"	8.118936	8.39983	8.278581	8.338529	8.426642	8.610949	8.753035	8.032648	8.157125	8.255153
"A_23_P130113"	5.870817	5.6476293	5.8425508	6.841252	6.628495	5.8818583	6.2266273	5.588899	5.9366336	5.3656464
"A_23_P130130"	4.4027476	4.1323843	4.4267035	3.8151631	4.5271072	3.774183	3.5091329	3.971336	4.0954204	3.820915
"A_23_P130141"	4.854028	4.9791164	4.695573	4.4721966	4.245565	5.3725243	4.8850536	4.7487087	4.91186	4.656095
"A_23_P130149"	8.335559	7.3501644	8.566244	7.940797	8.210009	8.349746	8.208814	9.787843	9.470378	9.015086
"A_23_P130158"	8.086042	8.756554	6.964526	7.865252	7.5262384	5.6811895	7.256736	9.490378	9.981401	9.886704
"A_23_P130169"	9.621925	9.3892975	9.48668	9.50851	9.02198	9.270199	9.022191	9.551376	9.605694	9.420775
"A_23_P13018"	11.631526	12.059645	12.058545	11.656224	12.062979	11.947483	12.510105	11.121867	11.621141	11.438231
"A_23_P130182"	2.778636	4.6033764	4.263433	3.6438606	4.674487	4.503701	5.112279	2.6780205	3.5410528	1.9123852
"A_23_P130187"	16.66544	16.61289	16.590853	16.197105	16.575033	16.427391	16.165537	16.724874	16.731693	16.751574
"A_23_P130194"	8.54048	6.923902	8.676993	6.988593	10.0089855	9.8509245	9.187166	11.78492	11.715898	11.925128
"A_23_P130241"	1.8651344	2.0234385	1.4945678	1.5031081	1.4879713	1.4920806	1.4975269	1.4914056	1.4920806	1.4916795
"A_23_P130259"	3.5166147	2.000107	1.7523359	1.7706494	3.199416	1.8485798	2.1590135	1.7462399	2.0121768	1.7613351
"A_23_P130266"	5.9542723	5.880504	5.719832	5.5813313	6.0556393	6.043587	5.6336937	5.491362	5.7834845	5.4068084
"A_23_P130281"	2.1042483	3.339881	1.995437	3.201237	2.9817188	2.887665	3.3709395	2.0321274	2.082761	2.1744504
"A_23_P130285"	6.982924	6.924408	6.8405495	6.937875	7.290355	6.485683	7.431854	6.1486034	6.6871576	6.6560297
"A_23_P130293"	7.505365	7.321489	7.671441	7.444163	6.9928894	7.4739914	7.6930146	7.4833956	8.039286	7.633157
"A_23_P130304"	13.011359	13.635447	13.271402	13.569985	13.541231	13.655997	14.446257	13.658172	13.765385	13.80181
"A_23_P13031"	6.3003864	4.6111817	4.302328	4.4856243	4.215299	4.310917	5.649452	4.135735	4.771223	4.585659
"A_23_P130316"	8.988705	9.770321	9.162682	9.619279	9.001242	9.269255	9.8895445	8.8675785	8.978836	9.0467615
"A_23_P13033"	9.878269	10.10786	10.045269	9.89658	10.136741	10.104733	10.118287	9.586788	9.582603	9.629955
"A_23_P130333"	3.3753674	4.5757113	5.207376	2.4512177	4.1031713	2.9911642	4.4152365	5.7074413	10.862362	10.444434
"A_23_P130343"	10.165177	10.545041	10.170249	10.6474285	10.727392	10.116644	9.406854	11.112614	11.151646	11.017608
"A_23_P130352"	7.1208954	7.732344	7.295026	7.7569017	7.8912034	7.41841	6.673585	7.855725	7.54098	7.8796706
"A_23_P130359"	3.8082771	5.576906	4.2513146	7.8807144	3.8479924	4.987034	5.996517	4.425001	4.0392876	3.9919958
"A_23_P130376"	6.6324987	6.4331465	6.478167	6.6705513	6.4118648	5.9917893	6.4546366	7.7408633	7.6735263	8.207108
"A_23_P130398"	3.2665067	2.0820713	1.7413247	1.6256487	1.607102	1.6470289	1.5853893	1.6282153	2.0362003	1.6209797
"A_23_P130411"	2.8663015	4.338915	4.3380585	3.0095825	4.644106	3.7837658	4.2636156	3.0303206	3.4016843	1.677667
"A_23_P130418"	13.331789	13.602582	13.4465685	13.541231	13.75186	13.575177	13.798161	12.9079485	12.650269	12.838473
"A_23_P130429"	8.045044	8.037307	7.7693176	7.9473753	7.7663555	7.781482	8.219987	7.42129	8.446964	8.159194
"A_23_P130435"	2.985866	1.7308688	2.8089287	2.5784218	2.5562317	2.6421497	3.297061	1.7659467	2.9222918	2.5929475
"A_23_P130444"	5.6149445	6.131026	6.1174626	5.133021	5.423381	6.124897	6.318875	4.596906	4.605784	4.7400436
"A_23_P130455"	11.317968	10.998514	10.851454	11.14878	11.160446	11.501637	11.117883	10.8119	11.314003	10.921758
"A_23_P130466"	8.933603	8.791086	9.293125	8.710276	8.685625	8.841971	8.644074	8.924121	9.036627	8.899314
"A_23_P130470"	5.704542	5.7187233	6.039598	5.933923	5.2757754	5.958559	5.452404	5.4346466	5.429252	5.545897
"A_23_P13048"	7.6190825	8.321045	7.7905965	8.305987	7.413331	7.8015223	7.7546396	7.772875	7.97076	7.9524803
"A_23_P130482"	7.553304	8.130616	7.8661957	7.614056	7.732869	8.113929	7.839276	7.0553203	6.842504	6.906542
"A_23_P130488"	7.8659725	7.9821243	7.9705744	7.67191	7.975303	7.9964914	8.115456	7.878867	7.946531	7.977275
"A_23_P130509"	7.146338	7.2015343	7.0525284	7.4891043	6.8460455	7.4581375	7.4512196	7.2587533	7.5672693	7.347158
"A_23_P130515"	2.9813774	2.6391547	2.7064893	1.8404366	2.8891878	1.77668	3.7977352	3.7285154	2.6287565	3.5307903
"A_23_P130531"	10.734079	10.465863	10.564727	10.420708	10.639465	10.719773	10.60245	10.286507	9.864898	9.905148
"A_23_P130537"	3.8470283	3.5263326	3.2580328	3.0220544	4.9629483	4.3196287	4.0609193	3.3416252	4.719458	4.0892315
"A_23_P130547"	2.0147705	3.8206232	2.4735262	1.7720003	1.6053551	1.6404997	3.1051154	1.6542246	3.2201421	3.2560804
"A_23_P130553"	8.044278	8.834326	7.964367	8.086528	7.8007545	8.025022	8.597332	6.7249775	6.628066	6.6743417
"A_23_P13057"	6.8951	6.5471153	7.0048285	6.7181153	6.278079	6.6917844	6.634837	6.982381	7.307764	7.044507
"A_23_P130573"	1.6312826	2.9167027	1.6891844	1.6807327	1.9442528	1.7362658	1.6399035	1.7046952	1.6483048	1.7185248
"A_23_P130585"	5.141817	5.177256	5.4133825	5.2648335	5.245738	5.8854885	4.3652945	4.89869	5.0981297	5.1895595
"A_23_P130598"	7.0201097	7.1548576	7.471779	7.4531703	7.216416	7.4729977	7.341752	6.7416415	6.167293	7.1891785
"A_23_P130619"	5.3427258	3.9749165	5.767893	2.7396169	3.6195896	2.8244758	3.3195374	4.075794	4.26916	5.2994823
"A_23_P130626"	13.472965	13.870164	13.852027	13.445759	13.246037	13.138174	13.281885	12.897417	12.958481	12.918922
"A_23_P130639"	8.500741	9.219843	9.207565	10.012818	9.148169	9.618166	9.216568	8.494138	8.858127	8.537165
"A_23_P130642"	11.460072	11.758956	11.384856	11.448537	11.324116	11.29188	11.419767	11.726404	12.258527	11.675827
"A_23_P130648"	9.580956	9.662089	9.87787	9.476275	9.680393	9.644387	10.104501	8.954252	9.131607	9.048546
"A_23_P13065"	9.924079	10.17051	10.154527	10.062895	9.475262	9.640219	9.894703	9.555806	10.05441	9.92599
"A_23_P130653"	10.2669115	11.597468	10.304161	11.751576	9.546247	10.248557	10.041115	11.6139	11.3270035	11.486158
"A_23_P130677"	4.73735	3.8470283	4.578204	5.1356926	4.3854065	4.216219	4.3761787	4.751874	4.4500613	4.1348896
"A_23_P130689"	10.220496	10.231452	10.269069	10.313723	10.274553	10.390929	9.384205	10.324544	9.773392	10.181981
"A_23_P13073"	10.249827	9.868433	10.171971	10.315974	10.286103	10.625179	10.1826935	10.649681	10.451072	10.667896
"A_23_P130731"	9.627972	9.6077175	9.532521	9.579858	8.966335	9.978222	9.718418	9.411382	8.915245	8.976291
"A_23_P130735"	6.1622562	5.0708137	6.0453954	4.8643517	6.096679	4.343708	5.1132383	6.77708	6.4575195	6.2485285
"A_23_P130743"	2.5630548	2.7933998	2.650004	1.9444342	1.8035554	1.8704301	1.7877235	2.9245121	2.012792	1.8219824
"A_23_P130753"	10.9154	11.858288	11.314709	11.419004	11.709999	10.502799	11.69108	9.403899	9.815088	9.759894
"A_23_P130761"	9.983005	11.017137	9.989146	10.3057165	10.133453	9.622905	10.506821	9.391953	9.900009	9.6723585
"A_23_P130764"	7.518297	7.28423	7.597985	7.3066726	7.6114683	7.660424	6.556711	8.379379	8.243601	7.9876556
"A_23_P130780"	9.334661	9.541492	9.42539	9.331853	9.377038	9.334825	9.315076	9.692316	9.774697	9.647836
"A_23_P130787"	5.93755	6.560879	6.0870895	6.784028	6.277404	6.951084	6.9464946	6.018926	5.829212	6.441755
"A_23_P130811"	4.1387296	2.6937191	5.9646873	5.879228	4.808682	9.614565	1.8269198	8.132884	8.417281	7.881237
"A_23_P130815"	4.0817537	3.8767636	2.9208086	3.7173903	4.796814	3.9616933	5.184092	3.168008	4.0950265	4.2131143
"A_23_P13083"	2.5855362	2.0387058	2.8424153	1.9027038	1.7449615	1.8218732	1.7880281	1.734726	3.1460302	2.5502253
"A_23_P130836"	7.608527	8.033428	7.999626	7.8384886	7.919752	7.8061953	8.056275	7.865468	8.666402	7.59667
"A_23_P130856"	6.4926453	6.2984343	5.927083	6.406637	6.10614	6.4423566	6.439082	6.6835155	6.612063	6.598629
"A_23_P130865"	9.521621	9.305721	9.37622	9.157869	9.383323	9.563917	9.465379	8.457367	8.815396	8.569754
"A_23_P130876"	7.7507596	7.2326326	7.1967387	7.454871	7.0898647	7.3733473	7.393959	7.3457727	7.071144	7.2845216
"A_23_P130886"	9.713505	10.219542	9.666732	9.801137	9.9739485	9.729282	9.90836	8.747802	9.02529	9.072248
"A_23_P130900"	7.12826	7.556327	7.5077786	7.4176946	8.022864	7.8220296	8.536619	7.439498	8.350643	7.3399897
"A_23_P130906"	5.324561	5.1919765	5.4616437	5.4093733	5.3186398	5.619152	5.5150833	4.9971485	5.5201693	5.178383
"A_23_P130919"	9.265981	9.151564	9.198766	9.347234	9.433816	9.313993	9.535883	8.645028	8.904882	8.8675785
"A_23_P130926"	9.99497	10.521151	10.01682	10.332703	10.655519	10.482025	10.998392	10.441095	11.135113	10.401342
"A_23_P13094"	1.6544478	4.84977	1.7035884	4.748969	7.595663	1.7478852	4.8323092	1.7280204	1.6661592	1.7381115
"A_23_P130948"	2.0298219	1.6932449	1.7974681	1.9852483	2.1265945	1.8362578	2.2823405	1.7308688	1.693573	2.4409442
"A_23_P130961"	4.0461144	4.549847	3.8071685	3.6143775	3.9567106	3.99911	4.2384315	4.30525	4.3826036	3.1446497
"A_23_P130965"	10.28587	9.065066	9.20222	7.841637	8.992244	8.871891	8.6003895	10.16382	8.593511	8.820728
"A_23_P130974"	11.515431	12.615851	11.570675	11.868388	11.972163	12.143822	10.8542595	11.09403	11.5983	10.742672
"A_23_P130995"	9.731056	8.093783	8.161345	8.3672495	10.0844	7.7820606	8.78461	9.221041	9.148401	9.685413
"A_23_P13102"	1.8212552	1.7824975	1.9457282	2.1746898	2.122807	2.0694127	1.9816142	3.3611999	1.8097636	3.2684538
"A_23_P131020"	8.05475	7.9936247	7.9574327	7.907017	8.333975	8.949381	9.21261	8.439004	8.216017	8.542061
"A_23_P131024"	2.2055213	1.8129233	1.558797	1.6051642	3.8341637	1.7520199	4.4000134	1.5200981	2.003905	1.535754
"A_23_P131036"	3.6307607	3.7524786	4.361361	3.686879	3.906226	3.5081282	3.8772745	3.537208	4.207414	4.113103
"A_23_P131050"	4.2563753	6.0571127	4.684545	5.1284995	4.3718762	4.887426	4.699279	4.2277107	5.200068	4.775746
"A_23_P131060"	7.6378284	7.9370303	7.6872654	7.826972	7.2438946	6.6878552	7.0086703	7.4114747	8.090587	7.2087398
"A_23_P131074"	5.1706514	4.9201927	4.22796	4.5356135	4.856498	4.4194036	4.795429	5.2928395	4.898342	4.2915936
"A_23_P131089"	9.196745	7.6875033	8.166913	7.2945933	8.4815855	6.888565	7.429957	9.211051	8.498832	8.673077
"A_23_P131096"	11.348388	11.448963	11.395241	11.093578	11.282889	11.436128	11.380617	11.310416	11.505491	11.218079
"A_23_P131111"	10.614204	10.9705515	10.560819	10.726812	10.688297	10.526516	10.658074	10.942446	11.449537	10.890973
"A_23_P131115"	8.17854	8.429283	8.24202	7.9819465	9.132487	9.166272	8.900593	8.152363	7.7799306	8.408552
"A_23_P131128"	6.847745	7.2687826	7.2243237	7.2105594	6.842844	7.1829486	7.047208	7.0978074	7.1715527	7.2870607
"A_23_P131139"	9.457524	10.232902	9.399822	9.387863	8.570507	8.739418	8.53197	10.11534	12.426322	14.082881
"A_23_P131149"	10.238449	10.505477	10.411623	10.404467	10.3276825	10.441095	10.556944	10.021829	9.685114	9.917424
"A_23_P131170"	1.497304	1.4946465	1.4916168	1.4884069	3.6438606	1.4907204	1.4902172	1.5099642	1.5013089	1.5060081
"A_23_P131176"	7.410878	7.1059303	6.326988	6.9537554	7.115653	7.045552	6.2970314	7.2105594	7.378352	7.270727
"A_23_P131183"	2.908044	3.5394459	2.8858683	3.1460302	3.3015	3.7483342	3.549055	2.7939336	3.3183663	3.410592
"A_23_P131202"	6.089887	6.735935	5.7571583	7.1623507	9.554921	8.911519	9.42539	8.613167	7.9835854	9.387863
"A_23_P131208"	3.7968788	4.973352	2.9198713	5.5810223	9.678326	2.3973303	5.2895284	10.252184	10.927037	10.762524
"A_23_P131215"	7.781482	12.582969	5.830372	7.6921906	5.455512	6.4982615	5.2648335	3.832354	6.313203	5.906589
"A_23_P131227"	9.965639	9.612381	10.021829	9.885345	9.999333	10.063011	9.934762	10.373008	9.930613	10.151974
"A_23_P131240"	7.8228626	8.100466	7.924153	7.9202795	7.8705096	7.865252	8.210271	7.59187	7.2258954	7.755967
"A_23_P131255"	12.005593	8.4874735	10.019558	10.448123	10.857287	8.577568	9.040107	12.663731	12.302335	12.329867
"A_23_P131263"	3.9307456	3.166326	3.685947	5.0029573	2.8112495	1.6461732	1.659379	3.5748982	3.4990501	1.8263314
"A_23_P131289"	8.658909	9.785242	8.686094	10.136088	9.046034	9.54092	9.160449	8.917385	8.871103	8.920078
"A_23_P131299"	9.711039	10.09531	9.993708	9.9569645	10.068521	10.384252	10.211976	9.559666	9.091368	9.287551
"A_23_P131308"	9.531663	9.137816	9.202039	8.902652	8.814197	8.180272	9.06423	7.552276	7.103694	7.736266
"A_23_P131330"	6.170912	7.040835	4.2076907	4.7156796	5.867088	7.655958	7.5946	6.7368417	5.730859	6.034453
"A_23_P131337"	9.733297	9.679626	9.8475065	9.620133	9.422837	9.514513	9.560882	9.5235405	9.611191	9.702532
"A_23_P131348"	8.765975	8.306633	8.837519	8.646058	8.65273	8.575095	8.625117	8.802676	8.587392	8.405204
"A_23_P131363"	10.970273	11.239339	11.417295	10.927666	11.203637	11.459745	11.714961	10.7705	10.856729	10.893038
"A_23_P131365"	13.15474	13.530086	13.512093	13.117117	13.247594	13.52284	13.862032	13.021843	13.440817	13.113693
"A_23_P13137"	9.079961	8.78826	9.339517	8.861056	8.318108	8.837519	8.946035	7.6154103	8.420593	7.622586
"A_23_P131375"	9.260988	10.288191	8.93473	10.122717	9.620133	8.863414	9.709655	9.114857	9.3174305	9.772172
"A_23_P131383"	12.663731	12.887032	12.808875	12.964035	12.887032	12.905109	12.597802	12.93808	12.969524	12.756933
"A_23_P131394"	6.2879767	7.202181	6.432508	7.0802503	6.5440784	6.284122	6.541641	6.0316916	6.556711	6.142744
"A_23_P131417"	11.753677	12.01713	11.900399	11.905023	12.187221	12.148741	12.759982	12.562626	12.732095	12.639131
"A_23_P131428"	1.8126777	4.3264875	3.9661481	4.173424	3.3548985	5.405784	4.2667627	4.6931977	1.8854634	3.8299584
"A_23_P131435"	7.747575	6.012498	7.046761	5.5678406	7.852024	6.9437385	7.1383405	7.495701	7.3374996	7.3350725
"A_23_P131449"	9.290389	9.220768	9.6357765	9.598916	9.184336	9.420521	9.2722435	9.727033	9.803534	9.497832
"A_23_P131463"	5.6167784	6.22594	5.9861116	5.855357	6.098363	5.628072	6.4721465	5.290577	5.3473063	5.2413692
"A_23_P131476"	12.013908	11.848833	12.2109785	11.799094	11.922509	12.39166	12.640158	11.926942	11.802782	11.918482
"A_23_P13150"	7.8249855	8.392197	8.034895	8.440577	7.612491	8.431296	8.352329	8.294277	8.338979	8.237215
"A_23_P131502"	5.128759	5.8370943	4.6327276	5.0131636	5.2925634	5.442833	5.550131	4.626652	4.6033764	4.5754457
"A_23_P131518"	6.4669275	6.4819617	6.873684	6.495513	6.4028068	7.5264754	6.700254	6.934744	5.994843	6.555178
"A_23_P131526"	10.340514	10.254215	10.385725	10.119548	10.3985815	10.406671	10.507536	9.9644575	9.745966	10.029888
"A_23_P131534"	5.385153	5.192921	5.0319777	5.2019377	5.1437316	5.7468724	5.2988935	7.0784945	6.1690154	6.0510893
"A_23_P131566"	5.022646	5.8584065	5.4919157	5.0827703	4.436663	4.0935464	3.0735898	4.91743	5.0157614	5.375679
"A_23_P131588"	3.949827	4.5739746	3.82218	4.5739746	4.332221	4.5620627	4.394969	4.3768578	4.8117704	4.4296317
"A_23_P131596"	9.323228	9.97748	9.867335	9.872282	10.072181	9.88768	10.179698	9.620615	10.107042	9.951737
"A_23_P131611"	5.7914305	6.2087946	5.900052	7.0363307	5.2781363	6.5128465	6.709278	6.8463926	6.792738	6.5937185
"A_23_P131614"	8.611111	7.808632	8.763275	8.796986	10.232645	7.2404294	8.086528	8.889509	8.124732	7.5084767
"A_23_P131626"	12.543664	12.579855	12.433989	12.546193	12.58327	12.513053	12.783447	12.473211	12.65129	12.38132
"A_23_P131646"	10.222002	10.697155	10.471144	10.619013	10.655784	10.38375	10.701239	10.732082	10.755053	10.726812
"A_23_P131653"	10.929309	11.556875	11.363018	11.462662	10.734079	10.941939	10.821735	10.741853	10.283786	10.99575
"A_23_P131664"	11.868077	11.700018	11.92982	12.001104	12.062326	12.094853	12.286409	12.49937	12.276602	12.389681
"A_23_P131676"	9.251548	7.552855	8.921309	9.37936	9.987006	7.7686496	9.063642	9.94772	7.935069	10.01091
"A_23_P131683"	9.080259	9.625407	9.461944	9.04561	8.892303	9.244663	9.314831	7.932513	7.960887	7.986779
"A_23_P131706"	11.020414	11.109559	11.178082	11.209575	11.154535	11.137023	11.355259	10.361406	10.374513	10.749643
"A_23_P131723"	14.045896	14.121952	14.2282	13.827415	13.403736	13.547474	13.54923	13.615038	13.138671	13.720401
"A_23_P131737"	10.074083	9.812149	9.81156	10.112427	9.549393	9.576495	9.839305	10.2442255	10.042495	10.1581
"A_23_P131747"	11.062546	10.912847	11.226031	10.912124	10.13148	10.135608	9.81921	10.910162	10.92446	10.4628935
"A_23_P131754"	7.199288	5.57488	5.644544	5.474983	6.149987	5.45626	5.7922916	7.3577056	8.710533	8.699533
"A_23_P13176"	11.098566	10.678039	11.50481	11.104985	11.215136	11.336793	10.909448	11.306477	10.965216	10.889083
"A_23_P131771"	8.316489	7.8696365	7.9932323	7.7663555	8.112198	8.852547	8.366043	7.8233733	6.9800935	7.8680778
"A_23_P131778"	11.363526	11.297222	11.433513	11.25599	11.415748	11.5171	11.189247	11.039219	11.0366	11.092484
"A_23_P131785"	2.3794181	1.7903271	1.9550506	2.2128887	3.2548895	2.0795624	1.9990091	3.3888123	2.732905	2.0640733
"A_23_P131789"	2.7369878	1.5109787	1.5423436	1.568151	3.1482606	3.2164545	1.5457596	2.0412576	2.215024	2.0544882
"A_23_P131801"	6.191729	6.577846	6.95693	7.1546636	5.7888126	6.136455	1.6597241	4.742729	5.428937	5.141276
"A_23_P131816"	11.493869	11.526363	11.398581	11.420597	11.413537	11.314332	11.291498	11.213423	11.153176	11.061016
"A_23_P131825"	7.701746	8.019935	7.6508927	9.974866	6.4706926	6.863454	6.2953825	8.286036	9.439902	9.181591
"A_23_P13183"	11.424497	11.8369	11.463266	11.850942	11.575132	11.27014	11.761404	11.519324	11.375967	11.24785
"A_23_P131834"	7.610508	7.586854	8.106234	7.489817	7.595522	8.54772	8.496899	7.668146	6.9141316	7.087707
"A_23_P131846"	7.2580366	5.5286436	7.2471294	6.2492266	8.515607	5.2673826	6.337575	8.473	7.4055886	7.612012
"A_23_P131866"	6.088569	6.833782	6.514007	6.2325106	6.0388517	6.161539	7.3557353	5.492298	5.2971053	5.7775664
"A_23_P131875"	1.6169237	1.5969567	1.6225972	1.7581955	1.6176968	1.6337758	1.5967038	1.6784921	1.6276265	1.6779581
"A_23_P131887"	6.7130537	6.322757	6.9165583	6.116686	6.188437	5.7450213	6.477535	5.872296	6.1605206	6.2227893
"A_23_P131899"	6.549232	6.1876936	6.743469	6.0322313	5.7114673	6.016624	6.0330195	5.0778084	4.8365536	5.342045
"A_23_P131909"	7.6490135	7.8318048	7.483285	7.552276	7.1967387	7.457352	7.399731	7.74662	7.8727236	7.6691127
"A_23_P131924"	7.739644	7.841637	7.810065	7.8700485	7.379504	7.622586	7.660217	7.617718	8.408552	7.628533
"A_23_P131935"	4.989401	1.9796875	4.4508095	5.4755282	5.108689	8.301723	7.856234	7.4986396	5.765704	5.6969066
"A_23_P13195"	2.7867713	1.6376995	1.7265325	1.8570603	1.6848441	1.7536104	1.7682875	1.6699328	1.6295141	1.6609857
"A_23_P131954"	11.139865	10.669228	10.619013	10.652919	11.304853	10.87986	10.937569	11.291254	11.680048	11.443359
"A_23_P131967"	8.703364	8.242169	8.929623	8.311839	8.382741	8.975317	8.35414	8.278014	8.178914	8.509805
"A_23_P131990"	6.7654076	6.021498	6.847986	5.548402	5.178643	4.6995163	4.4570003	6.9083548	7.0944476	6.521598
"A_23_P1320"	7.340803	6.5671797	7.237859	6.9305253	5.533556	6.7709174	5.8326864	7.05289	6.887667	7.1173825
"A_23_P132004"	2.8691952	3.054459	3.269537	1.6689363	2.5242202	6.2395487	2.2838132	2.4167109	2.0632439	1.6495681
"A_23_P132019"	7.59266	7.873237	7.974788	8.042286	7.7426496	8.210844	8.087242	8.159838	8.085691	8.029705
"A_23_P13202"	6.400047	6.3983383	6.193195	6.3122306	5.893455	6.268731	6.294163	5.882106	6.3849487	6.095077
"A_23_P132027"	6.7895665	7.5229416	6.5357013	7.930639	7.4255004	7.618821	7.046761	9.639895	8.033428	7.693132
"A_23_P132041"	1.5577662	1.5581971	1.5953969	1.597058	1.5855647	1.617308	1.5711186	1.6007504	1.562173	1.6009429
"A_23_P132057"	4.8268747	4.436663	5.039573	4.6332464	3.848453	4.7282386	3.6181931	2.9254582	3.7141979	3.7401252
"A_23_P132079"	9.718031	11.54737	10.009382	10.544817	10.992588	12.018517	11.704132	10.587148	9.530395	10.188211
"A_23_P132115"	4.6772857	4.2596416	4.36407	3.005577	6.4280906	3.3346045	2.829406	4.8127003	5.555534	5.606871
"A_23_P132121"	7.818609	8.061904	7.9233236	7.358705	8.791916	7.612012	7.188179	8.16336	9.040107	9.04308
"A_23_P132138"	9.148017	8.677876	10.556859	8.417667	8.505397	9.758874	8.643029	9.770321	10.289463	9.499338
"A_23_P132139"	10.0751915	9.888842	10.2682705	9.662267	9.561076	9.837457	10.1734295	10.522565	10.309183	9.922367
"A_23_P132147"	1.6242683	1.5724901	1.6244214	1.723226	1.7458836	2.0715191	1.6542246	1.5676757	1.7462399	1.5833766
"A_23_P132159"	9.382335	9.848382	9.453519	9.972907	9.520766	9.429703	10.036438	9.553239	9.182641	9.357317
"A_23_P132175"	6.9867063	5.2934756	5.6173754	5.3183823	5.79558	4.673823	5.459279	8.924024	8.580198	9.265703
"A_23_P132185"	6.5546584	5.2854877	6.3354044	5.587879	7.344032	5.3253326	5.36008	7.0903673	5.717292	5.881162
"A_23_P132197"	4.017639	3.587539	3.800357	2.4765544	3.3678293	3.5651982	3.1482606	2.2563725	3.4274821	2.1471298
"A_23_P1322"	3.8463674	2.7857919	4.6332464	3.3812585	4.1348896	2.868654	2.8678598	4.1360736	4.1834354	3.9367056
"A_23_P132216"	12.199893	12.023341	12.105468	12.001972	12.363585	12.279295	12.540176	12.262931	12.479218	12.503413
"A_23_P13222"	8.221151	10.387504	8.765146	9.752359	8.39352	8.441164	8.465487	9.955535	9.248178	9.751989
"A_23_P132226"	11.439119	10.637641	11.351453	10.889526	9.597117	8.744587	9.964119	9.378675	9.509494	9.721026
"A_23_P132237"	4.534226	3.3745942	3.3548985	1.6985025	3.9226348	4.8612328	4.815247	3.2950897	4.312816	5.295993
"A_23_P132248"	9.055986	8.90187	8.961626	8.79346	8.374855	8.550903	8.606669	7.8705096	7.89098	7.826855
"A_23_P132260"	8.462654	8.67161	8.360307	8.708396	8.147312	8.324074	8.395498	7.8190455	7.945571	7.793437
"A_23_P132263"	9.96148	9.898464	10.118944	10.004254	9.6560755	9.769381	9.597508	9.770539	10.075532	9.582232
"A_23_P132277"	9.103445	9.621925	8.584274	8.114105	9.246349	9.405631	9.848066	8.224268	8.857661	8.4182625
"A_23_P132285"	8.881315	9.293577	9.024199	9.069628	9.809367	9.244171	9.362174	10.629405	10.724743	10.576729
"A_23_P132294"	13.734131	13.80181	13.768517	13.756213	13.953166	13.789503	13.839545	13.535283	13.477731	13.506328
"A_23_P132308"	7.5104113	6.5710106	6.5796633	7.4952683	6.5342317	7.7501926	7.223467	8.840663	8.7115345	8.436251
"A_23_P132316"	4.092755	4.8673964	3.2362018	3.700786	3.5636787	3.8335657	4.0179467	3.9388785	4.0239553	4.2329264
"A_23_P13232"	8.187232	5.786972	7.0244775	5.5340543	4.6660676	5.285203	4.066071	6.653452	6.2986836	7.309177
"A_23_P132341"	6.8057556	7.5466766	7.232876	6.9757586	7.0465612	7.516444	7.153172	7.1000385	6.7827883	6.782576
"A_23_P132358"	9.651161	9.538351	9.684373	9.670895	9.499554	9.88397	9.71469	9.78756	9.977777	9.795579
"A_23_P132365"	12.202058	11.800154	12.185048	12.264483	11.727009	11.927681	11.423476	12.520207	11.711924	12.47105
"A_23_P132378"	6.801391	4.4393444	4.442999	2.9998949	6.711402	1.6117853	4.927206	7.741066	8.710768	9.698521
"A_23_P132388"	9.150295	9.303957	9.306994	8.767166	10.204417	9.9048815	9.885702	9.857967	9.5019455	9.827577
"A_23_P132405"	12.330956	11.947891	12.397419	11.835447	12.419154	12.694452	12.729504	12.129242	12.298513	12.152064
"A_23_P132417"	9.643984	9.450957	9.740513	9.302291	9.596067	9.25815	9.511339	10.16034	9.627972	10.115075
"A_23_P132438"	8.927588	8.536377	8.996894	8.529308	8.671951	8.419315	8.420841	8.592031	8.639238	8.268367
"A_23_P13244"	2.4548554	3.4830165	2.3443563	2.5415719	3.244789	1.5850365	1.8161888	3.124807	3.609601	1.5682456
"A_23_P132444"	12.281681	11.761017	12.1576605	11.89015	11.790404	11.970325	12.011926	11.938709	11.96797	12.036938
"A_23_P132454"	10.891326	10.773941	10.840193	11.141211	11.522263	11.116786	10.861796	10.959404	10.670878	10.694085
"A_23_P132468"	7.133286	7.6062107	6.501718	7.0111346	7.3222303	6.4002943	6.3171077	7.3372564	7.101048	6.6322694
"A_23_P132486"	9.9999695	9.966118	10.15369	10.098523	9.510245	9.783231	9.819963	9.775109	9.852165	9.869992
"A_23_P132499"	4.77949	4.450307	4.9846582	2.8039804	3.143538	1.6878453	3.2506416	4.722449	5.2129326	4.1810665
"A_23_P132515"	9.824314	11.114493	10.104268	10.471552	10.154815	9.961181	7.502778	9.646368	9.807464	9.575323
"A_23_P132526"	9.055013	9.330555	9.2598715	9.142024	8.945205	9.39075	9.545341	9.115688	8.846811	8.943206
"A_23_P132536"	12.166903	11.750668	12.045084	11.709552	11.552723	11.811613	11.713291	11.006415	11.29188	11.485853
"A_23_P132560"	7.9774914	8.415807	8.396593	7.5603085	8.277739	8.812798	9.222011	7.841637	7.833602	8.382741
"A_23_P132569"	1.6112529	1.6071992	1.6252432	1.6590457	1.5901845	1.6212928	4.7422595	1.6664916	1.6116786	3.2576272
"A_23_P132595"	10.077223	8.945382	9.252576	9.841252	9.706128	9.887175	9.470844	10.049783	9.910367	9.951961
"A_23_P132606"	2.5683737	4.121055	2.4972649	4.880999	2.5323782	3.8154573	4.6074824	3.7606506	4.4147787	3.159001
"A_23_P132611"	17.411232	17.3247	17.315746	17.214016	17.400955	17.37422	17.237158	17.170229	17.411232	17.114296
"A_23_P132619"	5.2291555	5.8181863	5.0590997	5.497605	6.640086	5.7685657	6.2414923	6.389758	5.812877	5.0049534
"A_23_P132644"	9.923692	10.138693	10.363826	9.259663	10.6214905	11.991105	11.600812	10.664209	10.376144	9.896337
"A_23_P132654"	5.088037	4.6143603	5.2223907	4.062901	5.201097	4.8841867	4.598136	4.7406254	4.808509	4.14096
"A_23_P132669"	12.475574	12.816861	12.563067	12.914255	12.437426	12.425026	11.892207	12.771758	12.329867	12.65564
"A_23_P132675"	11.897357	12.451786	12.2955475	11.787051	12.214837	12.160141	11.359666	11.521459	11.798124	11.635909
"A_23_P132684"	4.1232057	4.026547	3.6057763	4.192056	4.297823	4.538387	4.9721346	3.5688682	3.8181968	3.6904988
"A_23_P13271"	1.7871945	4.4778214	4.364386	3.9655056	1.6797969	4.647835	4.542045	2.9825659	1.9482458	3.7565038
"A_23_P132718"	9.178318	7.843178	8.396386	6.682108	9.21261	8.106431	7.821386	11.198483	10.399014	10.161097
"A_23_P132730"	5.422199	5.622864	5.770622	5.6476293	5.465922	5.9568253	5.7022786	5.435753	5.7669573	5.519658
"A_23_P132738"	7.357262	7.719696	7.2404294	7.9119034	7.155612	7.1163816	7.219639	7.006951	7.382889	6.982924
"A_23_P132760"	5.2790275	8.113725	2.1328652	10.160836	2.0640733	4.0968704	3.5738516	2.642569	2.3607674	2.6921155
"A_23_P132763"	4.6534977	2.4464183	4.2814503	2.07434	7.146338	2.0902944	3.9783726	6.194664	4.8735843	4.3045964
"A_23_P132784"	11.851899	11.738981	12.078411	12.048075	11.939184	12.107348	12.393778	12.241427	11.989027	11.968824
"A_23_P132793"	12.562626	12.82038	12.311362	13.55559	12.586441	12.826225	12.394324	13.601663	13.755582	14.1369915
"A_23_P132809"	7.7631726	8.137951	7.7273726	8.049508	7.871121	8.302448	7.6568336	9.19699	9.707384	9.462159
"A_23_P132822"	5.9418	6.033548	5.7489786	5.681851	5.599427	5.914027	5.8815827	5.781447	5.7510333	5.5849586
"A_23_P132826"	4.188706	5.274104	4.619143	5.799736	4.3617325	4.3606305	4.308422	5.9117255	4.008233	3.6661453
"A_23_P132845"	8.129977	7.842867	7.776585	7.6691127	7.8178034	8.579615	8.382177	7.608926	7.509963	7.624449
"A_23_P132856"	6.029188	6.224683	4.957326	4.6726685	6.064172	5.346553	5.035702	4.8879604	4.8158493	4.986373
"A_23_P132863"	11.452671	11.673194	11.514593	11.582062	11.807308	11.776259	12.193376	11.610918	11.933936	11.951172
"A_23_P132874"	12.245989	12.084402	12.189844	12.307282	11.411678	11.728196	11.465764	12.450179	12.177621	11.967517
"A_23_P132889"	11.596418	11.912332	11.72141	11.113891	11.631344	11.892207	12.073616	11.481464	11.542715	11.82192
"A_23_P132910"	8.186979	6.688042	6.265999	7.5231533	8.089672	10.317429	7.471779	7.677884	8.035982	8.68196
"A_23_P132915"	6.3325634	7.332144	5.3798046	7.419215	5.777744	6.4137506	4.9603357	8.510834	7.9574327	8.16426
"A_23_P132932"	6.439788	6.661173	6.3595243	6.336089	6.5112267	6.688042	6.66726	5.995146	6.646361	5.851179
"A_23_P132936"	10.696221	11.136249	10.610356	11.409329	10.89349	11.165218	11.45447	12.045642	11.753677	12.230262
"A_23_P13294"	4.9193945	5.179611	5.383627	5.8272676	4.883049	5.950642	5.210964	4.768619	4.775746	4.8365536
"A_23_P132948"	9.437792	9.867814	9.911926	10.190394	9.728268	9.483676	8.957663	9.781395	10.065881	9.714948
"A_23_P132956"	15.635316	16.135014	16.309822	15.932705	15.136399	16.243238	16.567104	15.8248415	15.688292	15.731724
"A_23_P132973"	13.389806	13.460304	13.521322	13.173772	13.267428	13.117799	13.243258	13.321939	13.04254	13.221863
"A_23_P133000"	1.6212493	1.892974	1.7028246	1.785852	2.5338662	2.5680592	1.6946752	4.632984	4.435254	4.223271
"A_23_P133036"	4.030137	1.5091213	3.0390942	3.1051154	2.07434	1.505584	1.5193802	1.5152426	1.508854	1.5113778
"A_23_P133058"	11.558225	11.690102	11.680983	11.792298	11.527463	12.062326	11.780003	11.727009	11.54325	11.735768
"A_23_P133068"	7.2763486	7.268336	6.908992	6.757114	5.9516687	6.847199	6.59937	6.6141057	6.523139	6.734997
"A_23_P133075"	9.64461	9.822428	9.6481085	9.598737	9.514978	9.5019455	9.71901	9.128413	9.141845	9.352138
"A_23_P133095"	12.384836	11.970135	11.967517	12.204406	12.112997	12.403881	12.465279	11.868388	11.223016	11.530064
"A_23_P1331"	6.988314	4.774537	4.814692	4.3080745	5.423884	2.692477	4.0519137	7.5850725	7.605787	5.9619355
"A_23_P133107"	4.4620223	4.7118955	3.147359	3.0657032	2.6717503	1.8946795	1.8205538	2.4756289	5.1304145	4.5743337
"A_23_P133120"	4.4818892	5.9117255	5.2168684	3.5206895	3.6928408	3.5235255	2.292757	4.359544	4.102393	3.8453221
"A_23_P133123"	4.9676695	7.5321183	5.7036023	6.3979917	5.623966	6.57254	7.2653885	5.5543556	3.5576923	4.01933
"A_23_P133133"	6.5600634	7.8001685	6.178407	8.413177	6.59937	4.520237	5.611358	7.954107	5.9856687	5.776061
"A_23_P133142"	6.022975	7.235685	5.7287416	7.7546396	6.2696595	4.412426	5.3238397	7.29214	5.2189713	5.222106
"A_23_P133146"	12.204845	12.520207	12.5811405	12.140698	12.518421	12.411727	12.331667	12.202974	11.630621	11.916371
"A_23_P133153"	2.1307664	3.2975705	4.546473	3.5894628	2.5234299	3.9001927	3.8107238	3.945778	1.9778265	2.7453928
"A_23_P133174"	9.601624	9.832482	9.699557	9.937422	9.880491	9.288119	9.951737	10.0060625	9.522928	9.8712
"A_23_P133216"	5.306285	6.319303	5.9230604	5.44802	5.632214	4.1650605	5.4707103	5.66889	6.016624	6.347678
"A_23_P133227"	11.210277	11.540672	11.345796	11.310982	12.03454	12.377627	12.661491	11.724035	11.640873	11.654671
"A_23_P133236"	8.075395	9.012849	7.7444406	9.397814	8.944473	9.193694	8.442948	8.771886	8.97229	9.006595
"A_23_P133245"	12.250434	12.275724	12.147371	12.254677	12.150415	12.269207	12.369015	12.285615	12.273592	12.289635
"A_23_P133263"	6.2066317	6.983174	7.698153	6.9551306	6.46772	7.381822	7.154267	6.6731844	7.1132245	6.3431945
"A_23_P133279"	9.483978	9.657465	9.932793	9.87693	9.583657	9.627328	9.656456	9.174869	9.091764	9.303957
"A_23_P133284"	8.532236	8.840982	8.722859	8.817532	8.484743	9.024497	9.148401	9.397814	9.438116	9.337737
"A_23_P133293"	7.3124266	5.5050716	6.050029	5.872509	6.6937838	5.9731097	6.065687	8.178203	8.068877	8.238821
"A_23_P133315"	10.035696	9.634793	9.970287	9.665329	10.626149	10.659158	10.770365	10.362526	10.328734	10.34825
"A_23_P133332"	10.44227	10.38375	10.774687	10.592272	10.87089	11.082874	10.959404	10.941503	10.600843	10.780923
"A_23_P133338"	5.2731566	5.6845584	5.8489113	5.350992	5.1622996	5.7419577	5.5429792	5.345374	5.396312	5.5626698
"A_23_P133345"	10.397115	10.482025	10.52222	10.7346735	10.494332	10.778742	11.013979	11.226031	11.397463	11.264832
"A_23_P133359"	8.243178	8.371576	8.393361	8.656207	8.438692	7.998807	7.96372	7.5644655	8.207708	7.700893
"A_23_P133365"	8.866093	8.724907	9.018606	8.793333	8.862419	8.923635	8.899776	8.440339	8.0712385	8.476585
"A_23_P133375"	9.651331	9.760895	9.581615	9.690605	9.239608	9.395176	9.738517	9.631876	9.392799	9.600834
"A_23_P13338"	5.3715796	5.4731183	5.6717286	5.3997245	5.4715657	5.93302	5.825388	5.11195	4.6402946	5.057305
"A_23_P133386"	6.799749	5.4457893	6.180664	6.499218	5.754947	1.5523552	3.4267757	4.836224	6.282679	6.3783126
"A_23_P133408"	1.7025784	1.6819112	1.7700374	1.8304827	1.7641947	1.8387325	1.7154294	1.7824975	1.7128078	1.7570531
"A_23_P133424"	14.791325	14.834742	14.781446	14.855756	14.6471405	14.5680275	14.95071	14.455941	14.576068	14.652229
"A_23_P133432"	13.845219	14.063975	13.93721	14.017357	13.692278	13.761595	13.963218	13.373156	13.207454	13.670355
"A_23_P133438"	6.6835155	6.6324987	8.097827	6.501991	8.200998	6.6956153	6.557908	8.064014	7.502384	7.4800715
"A_23_P13344"	15.44365	15.606669	15.423744	15.679658	15.361795	15.579544	15.240692	15.626926	15.471061	15.542101
"A_23_P133445"	8.590479	5.9978747	6.532624	6.23777	9.729152	5.653239	9.684676	7.1926975	10.804732	7.6900353
"A_23_P133457"	4.9354353	4.7500305	4.337551	3.9128046	5.083964	4.246195	3.609601	5.0327187	5.413624	5.225123
"A_23_P133470"	11.59546	11.914587	11.835016	11.714961	11.483298	11.753296	11.535184	11.680518	11.959472	11.889495
"A_23_P133474"	12.38927	8.555315	11.757315	9.943805	10.608117	12.281681	11.306825	12.063463	11.906668	12.8480625
"A_23_P133506"	6.2886086	5.8614035	6.0154443	5.374601	6.819233	6.371065	6.3741064	5.4629607	5.832319	5.4247117
"A_23_P133517"	4.602161	5.2036343	5.385475	4.837467	5.693508	6.5112267	6.3461523	4.8316746	5.0971665	5.0199614
"A_23_P133536"	8.579046	9.069138	8.171524	9.860231	10.321539	11.283817	12.03121	9.899617	11.060081	11.01787
"A_23_P133543"	11.041837	10.5462885	10.3276825	10.974363	10.719773	11.282889	11.135113	10.740811	10.685665	10.289211
"A_23_P133582"	10.432103	10.54854	10.801443	10.567983	10.76221	10.670878	10.7058325	10.70316	9.622323	10.640635
"A_23_P133585"	10.619013	11.109289	10.875179	11.032253	10.902356	10.737006	11.058201	11.400648	11.19553	11.163529
"A_23_P13359"	11.242036	11.384856	11.404555	11.757315	11.432058	11.44253	11.125762	11.483298	11.173031	11.22769
"A_23_P133596"	12.341479	12.22134	12.2115135	12.534441	12.346283	12.617297	12.713477	12.514736	12.523419	12.468239
"A_23_P133606"	6.872684	5.8212857	5.486501	6.2497163	6.4533544	7.393336	6.8491635	8.11959	7.490271	7.51766
"A_23_P133629"	10.373618	10.14579	10.364589	10.259764	10.28587	10.530099	10.417186	10.324902	9.899617	10.192318
"A_23_P133637"	2.3806007	3.0796003	2.8051143	1.6103743	3.2676868	3.805818	3.079981	4.222815	4.9444184	4.6585217
"A_23_P13364"	12.889615	14.3071995	12.888418	14.319237	12.621769	12.932563	13.384802	13.86464	14.094526	14.176693
"A_23_P133648"	6.911412	7.56126	7.1261444	7.8864574	7.409526	7.4632387	7.3628044	8.413177	7.160614	8.084493
"A_23_P133656"	10.76622	8.642421	9.957205	10.795081	11.898624	8.01696	9.859305	12.056396	9.464361	9.26634
"A_23_P133665"	4.801661	6.7543583	5.191021	6.904672	4.639921	5.3482485	6.4551477	5.62936	3.7877665	4.883656
"A_23_P133691"	11.406993	10.891647	11.351156	11.060493	10.86955	9.9191475	10.652571	10.291306	9.752669	10.235919
"A_23_P133694"	11.496142	12.254677	11.586357	11.84381	12.961256	12.674982	13.097874	11.132519	10.8818245	10.714756
"A_23_P133712"	5.1661634	2.7535286	5.0270677	5.9974084	6.570875	6.328721	6.726157	4.9989147	5.4698396	5.9649944
"A_23_P133722"	2.3661537	2.9711723	1.6586304	1.7734119	1.6119922	3.3566718	1.7006195	1.5915401	2.4765544	2.1981254
"A_23_P133728"	6.6956153	6.739454	5.717292	6.003104	6.2017784	6.116686	6.061847	5.5982995	6.6624045	5.906864
"A_23_P133739"	1.558797	1.5590606	1.5548984	1.5505923	1.5855092	1.537968	1.55089	3.4221323	2.6239955	3.3203218
"A_23_P133755"	10.006342	10.182921	10.052324	9.623474	9.5019455	10.315752	10.920085	10.134408	10.099677	10.132668
"A_23_P133770"	8.406234	9.466037	8.408552	9.239777	8.274955	9.2427435	9.27266	9.052317	8.917385	8.765755
"A_23_P133799"	8.281419	8.062613	8.162645	8.006458	8.0428095	8.542239	8.2364435	7.9198613	8.033983	8.090693
"A_23_P133807"	6.245457	5.9619355	6.162948	6.045142	5.7937183	5.982879	6.1734734	5.502636	5.420434	5.8471565
"A_23_P133814"	14.065413	13.53945	13.883594	12.920333	13.7634115	13.371343	13.132879	12.7016735	12.984094	13.092053
"A_23_P13382"	8.8273535	8.236972	7.318084	7.638999	10.917814	7.2262316	10.047432	9.093452	9.273636	7.712702
"A_23_P133842"	2.0687168	3.7645824	2.193544	5.474244	4.285809	2.2816236	3.8358734	2.665854	2.5218801	2.1492126
"A_23_P133854"	3.155037	4.4669347	3.7681394	4.289941	2.3190856	3.9650614	3.4185643	4.2433643	4.264256	3.8794014
"A_23_P133868"	6.9584317	6.637441	6.732175	6.767178	6.9584317	7.331818	7.004075	6.580401	6.238462	6.332108
"A_23_P133878"	3.549055	2.6091728	2.956479	2.4835715	3.145557	3.1444216	2.4450948	2.2505653	2.283088	2.3903701
"A_23_P133902"	6.8939533	4.3290434	6.592817	4.70772	5.0538263	5.336609	4.67051	5.1488953	5.131939	4.808682
"A_23_P133904"	4.521655	5.293714	4.6176043	4.6322145	4.7515593	5.1049395	4.909132	4.204406	5.3235025	5.033049
"A_23_P133916"	7.2015343	4.1133394	4.7762375	4.7413983	7.167162	5.771224	5.957344	4.9619064	4.063917	4.121326
"A_23_P133923"	11.766938	11.240884	11.966431	11.615308	11.671226	11.746246	11.717079	12.139856	12.152512	11.89579
"A_23_P133949"	1.9656571	1.65649	1.7531997	2.8728776	2.1500008	1.8391527	1.7067367	1.7548025	1.6878453	1.7692387
"A_23_P133956"	2.0066586	3.9573658	3.4927132	2.9579215	3.770045	2.1044588	3.9911797	2.0328326	2.0352824	2.0809228
"A_23_P133974"	9.96845	9.941625	9.877395	9.746632	9.80426	9.69881	10.245262	9.741676	10.20465	10.148139
"A_23_P133995"	11.257929	11.535184	11.308874	11.895016	11.069184	10.939984	10.729176	11.552723	11.647123	11.915076
"A_23_P134008"	6.9041076	7.763813	7.761526	7.6444125	7.6126256	7.4283757	7.4189315	7.313886	7.9219723	7.50646
"A_23_P134014"	6.0932236	5.714329	6.3992996	6.25424	6.9686522	7.094271	6.892877	7.0733767	6.695796	6.750305
"A_23_P134026"	7.6993647	7.7669926	8.04348	8.21892	7.9719048	8.478787	8.214855	8.1632	8.170939	8.133971
"A_23_P134041"	5.5311055	3.6636589	6.367984	3.6012907	4.6361685	2.6235473	2.7166786	5.8542404	4.484815	4.072128
"A_23_P134058"	5.8149066	4.753257	5.9900713	5.158678	7.02112	8.656611	7.76528	5.075648	5.6583033	5.900557
"A_23_P134078"	8.19196	8.528414	8.46987	8.878363	8.509805	8.4413185	8.023332	8.324074	7.951492	8.554948
"A_23_P134085"	8.319887	5.7011275	7.0406194	6.1749754	9.797655	13.0130415	12.513857	8.821469	9.123428	10.441398
"A_23_P134100"	3.6668446	1.7566758	1.8424829	2.127072	1.8622242	2.0006933	1.8587123	1.8882766	1.7711059	1.902458
"A_23_P134109"	8.033176	8.826614	8.038851	8.047633	9.657465	9.011204	9.592428	8.04348	6.9805818	7.131235
"A_23_P134113"	11.372985	11.357126	10.664645	10.875179	10.538769	9.481232	8.887391	11.417751	11.511244	11.010253
"A_23_P134125"	10.038925	10.306051	11.173777	10.7150955	9.800793	8.986152	9.712937	11.479138	11.250778	10.87161
"A_23_P134139"	8.478527	1.6563538	6.99175	2.0795624	2.1281805	1.7897038	1.7697403	7.7956715	8.667979	8.654103
"A_23_P134147"	9.202039	9.096537	9.196303	9.106197	8.729395	8.956809	8.855644	9.102564	9.012669	8.867857
"A_23_P134162"	5.0522404	6.8642793	7.1101675	7.5482697	3.801017	5.5628505	4.53947	4.941003	3.9548671	4.0725245
"A_23_P134167"	8.917718	9.037857	8.84383	9.064021	9.123428	9.480506	9.586788	9.305721	9.301751	9.591294
"A_23_P134176"	11.305317	11.345232	10.885456	10.901339	11.256857	10.342995	11.14878	10.758157	10.521658	10.670878
"A_23_P134191"	7.723246	7.822471	8.407189	8.149999	7.9089956	7.8233733	8.1405115	8.342972	8.036493	7.9556823
"A_23_P134204"	7.371727	7.371405	7.7752714	9.095595	7.4034643	8.015916	7.1173825	7.1715527	8.148712	7.5574074
"A_23_P134225"	9.961992	9.558592	9.864424	9.538604	8.969895	9.040362	9.202587	9.050463	9.603717	9.3660555
"A_23_P134237"	9.688139	7.6364737	9.8289175	9.851649	10.771143	6.887667	7.3323507	11.330378	11.919793	12.63586
"A_23_P134247"	12.2206745	12.506546	12.342929	12.267668	12.442709	12.825407	12.848843	12.067409	11.557402	12.025297
"A_23_P13425"	13.935639	13.963218	13.7634115	13.782254	14.082881	13.876257	13.523954	13.9862385	13.8934	13.920007
"A_23_P134274"	13.021843	12.686419	12.978283	12.840668	12.9079485	12.740572	12.867917	12.817558	12.939221	12.888418
"A_23_P134295"	10.2849865	10.006758	9.898111	9.513796	10.300709	9.668605	10.370325	9.197964	9.570788	9.089976
"A_23_P1343"	7.474979	7.290678	7.574293	7.4055886	7.287424	8.030422	7.7617693	7.476588	6.7824674	7.9424005
"A_23_P134314"	11.477679	11.376226	11.671756	11.690102	11.449537	11.444672	11.405068	11.599723	11.585333	11.778991
"A_23_P134340"	1.4985248	2.5892577	1.5066605	1.5137289	1.5091213	1.5105286	2.0344503	1.5120885	1.9356791	1.5027857
"A_23_P134347"	9.718418	9.603011	8.26981	11.171302	8.896008	7.6504574	8.8044405	8.328336	7.9331264	8.622112
"A_23_P134366"	3.4289155	2.2181485	2.6556435	1.516452	6.1145954	4.471293	4.031488	5.6905837	5.8959503	5.969339
"A_23_P13438"	9.439053	9.7531395	9.820471	9.530754	9.805051	9.920628	10.403405	9.255514	8.660796	9.108012
"A_23_P134384"	7.307006	7.338905	8.218711	7.0512533	7.3120065	7.648308	7.9960394	7.338905	7.577787	7.2438946
"A_23_P134395"	11.091309	11.203637	11.000937	11.470788	11.121362	11.653355	11.207563	12.31387	12.158749	12.114282
"A_23_P134405"	3.211207	4.7472277	4.8439994	4.5504723	4.5632796	4.7985415	3.0038621	4.2072153	4.091886	5.6406946
"A_23_P134419"	4.398585	2.2496078	4.3907814	3.6190584	3.235822	3.8157582	1.7774982	3.34087	3.8335657	3.4598486
"A_23_P13442"	3.7848213	3.5877762	3.4852371	3.0591795	3.4583385	3.6285343	3.2082655	2.7552855	3.433735	2.840261
"A_23_P134426"	12.102838	6.6293693	6.669638	8.527724	11.553099	6.3677073	9.236755	10.47543	11.423476	10.911527
"A_23_P134433"	13.107006	13.383523	12.806988	13.171037	12.8463955	12.917237	13.244917	13.593645	13.728442	13.528883
"A_23_P134454"	9.1744375	6.9245315	7.809922	8.4679575	10.078317	7.3869333	8.807329	8.53649	8.598336	8.965717
"A_23_P134464"	12.577556	12.732095	12.647479	12.627858	12.701198	12.910967	12.89127	12.630342	12.535099	12.438708
"A_23_P134477"	11.799094	12.365945	11.965796	11.500627	12.509304	12.427958	13.344578	12.31772	12.299227	12.267668
"A_23_P134484"	3.998745	2.4390213	1.4934479	3.1276462	3.5340734	4.4563246	2.378257	4.2443757	4.73735	3.1556718
"A_23_P134502"	3.910468	3.93168	3.594381	4.0473657	2.2952793	3.9883235	3.445718	3.2259767	2.7469835	3.2665067
"A_23_P134517"	8.087908	7.897541	8.505039	8.132305	7.8752785	8.040935	8.417979	8.24202	7.9121785	8.091458
"A_23_P134527"	8.299609	8.215827	7.1435695	7.8863077	7.7092295	7.830727	9.330555	7.8074837	8.148305	8.200998
"A_23_P134542"	1.5268333	1.5236508	2.4235945	1.5248996	1.6686894	1.532899	1.9201916	4.0701084	5.160605	4.171813
"A_23_P13455"	3.9681551	5.1212482	3.971158	4.603126	3.2733843	4.2796187	3.9481628	4.108576	4.398129	3.8860714
"A_23_P134566"	5.069044	4.7929325	5.331588	5.072114	2.8011088	3.536814	3.4736214	4.213528	4.9153185	3.5985525
"A_23_P134573"	10.062269	10.275733	10.11009	10.250589	9.66511	10.032419	9.769381	9.991911	9.881204	10.195099
"A_23_P134584"	1.8714608	2.230429	1.6534221	3.5508132	1.6064398	1.6589227	1.6870553	1.5840514	1.5627042	1.5775175
"A_23_P134601"	1.6556942	1.9752494	1.7393973	1.8302058	1.7009149	1.7602152	1.7348635	1.6914445	1.6619953	3.0888672
"A_23_P134609"	6.293034	6.7812805	6.0762625	5.9627066	5.9577365	6.224683	6.627241	6.2091923	6.7924585	6.4156704
"A_23_P134614"	9.057593	10.122717	10.222174	10.19008	9.671645	10.176577	10.189845	10.129733	9.575845	9.50169
"A_23_P134627"	5.1049395	5.6960826	5.0791473	4.7599807	4.6824713	5.562059	4.541263	4.7515593	5.1111073	4.762011
"A_23_P134637"	9.490986	9.097237	9.428233	9.106477	9.230194	9.545091	9.2196	9.355956	9.264848	8.858386
"A_23_P13465"	1.6191037	2.225569	1.6567973	1.7070234	1.6173822	1.6586304	1.6521109	1.6764776	2.628322	1.6756865
"A_23_P134650"	11.429045	11.117456	11.680281	11.117201	11.26247	11.238114	11.438715	11.368515	11.122992	11.124611
"A_23_P134663"	10.995137	10.547236	10.73727	10.142659	6.176972	5.434121	7.6475735	10.718781	10.614514	10.608314
"A_23_P134684"	12.801256	12.490921	12.894804	13.065342	12.411067	12.35419	12.721518	13.247594	12.330397	12.929993
"A_23_P134693"	12.879023	12.654574	13.462674	13.000802	12.896685	12.9708805	13.640244	12.760706	12.921554	13.064366
"A_23_P134704"	1.5707893	1.5933341	1.6524409	1.7606089	1.6025624	1.6638839	1.6863865	1.5973648	1.939613	1.5821092
"A_23_P134714"	8.682089	9.239074	8.736697	9.487798	10.015446	10.410581	10.203727	9.917424	9.554921	9.744276
"A_23_P134729"	4.5453477	5.638523	5.4633164	5.2360125	3.48086	5.4960866	5.208587	5.881328	4.9446793	5.284193
"A_23_P134734"	12.515652	13.236426	12.921554	12.439711	12.975509	13.354861	13.209545	12.723433	12.70618	12.535099
"A_23_P134744"	7.567021	6.5255623	7.3758407	7.264206	9.712746	6.964978	6.8511047	7.7960386	8.22404	7.4673934
"A_23_P134755"	5.738169	6.549091	5.864916	6.529586	6.4814496	6.9647813	6.004077	7.739086	7.347892	7.0218244
"A_23_P134764"	5.126979	5.249816	5.034175	5.0304527	4.709776	5.3715796	5.301951	4.763033	5.1780744	4.96619
"A_23_P134786"	9.257446	9.435259	9.228239	9.507933	9.509969	9.442594	9.723482	9.241178	8.844743	9.160449
"A_23_P13479"	3.0796003	3.8018806	2.8525982	3.5480106	3.0013306	3.5430553	3.3804832	3.0260112	2.5784218	2.5485396
"A_23_P134809"	11.248165	11.328775	11.252415	11.407324	11.04656	10.187779	10.854827	10.863409	10.47249	10.395553
"A_23_P134814"	10.164108	9.765482	10.104911	9.839305	10.014684	10.216843	9.932367	9.771342	9.678326	10.018613
"A_23_P13482"	10.322472	9.420942	6.3060646	10.600004	7.046761	6.614458	7.28485	9.11927	9.292604	9.167079
"A_23_P134827"	11.318995	11.066981	11.295983	10.898734	10.982183	11.24516	11.04967	10.730386	10.296021	10.496394
"A_23_P134835"	9.046307	7.0346165	7.874899	7.444732	9.177395	7.4799485	7.3232045	9.879905	10.08067	10.376348
"A_23_P134851"	6.0689635	5.255206	5.518835	4.5938163	6.1761074	5.37746	6.105446	5.450286	5.0136695	5.2218275
"A_23_P134854"	5.3798046	3.110974	2.6780205	3.6160898	6.826119	3.7488828	4.3107057	8.090693	6.1813827	6.627388
"A_23_P13486"	6.051891	5.0898724	2.048101	6.405654	1.9371027	2.254687	2.0945194	4.8203154	3.8528085	4.6540933
"A_23_P134887"	4.774229	4.845862	4.3116026	4.3378015	4.5236545	4.652189	4.6332464	4.779792	5.8397436	4.8072324
"A_23_P134910"	6.5970883	4.1565394	7.6499753	7.803064	6.901386	7.349812	5.6048727	6.6608105	6.3207154	6.9324074
"A_23_P134914"	12.045084	14.139336	13.354861	11.962534	10.731663	5.615662	8.610949	10.896518	12.851376	13.530086
"A_23_P134925"	12.158749	11.9875555	12.346283	12.059085	11.738452	11.744795	12.21262	11.58041	11.406286	11.590705
"A_23_P13493"	6.633642	5.02301	4.789681	4.9991074	5.588899	4.942048	4.7502775	6.3439794	6.564918	5.6039867
"A_23_P134935"	7.4736533	7.327796	7.198497	7.350892	7.6506042	7.7824965	7.1823196	8.243431	7.8618417	7.8145843
"A_23_P134946"	9.244171	8.965495	8.951027	8.945527	8.27243	9.322854	9.217612	8.455162	8.425819	8.74216
"A_23_P134953"	8.194317	6.007125	6.543018	5.624281	7.478365	6.637036	7.391197	8.520153	7.217294	6.8799567
"A_23_P134980"	4.992829	4.204671	3.8095179	3.537208	4.657349	4.2659082	4.991095	3.8498054	4.307294	3.7024212
"A_23_P134991"	7.8568287	7.8298154	6.3792315	7.4444895	6.9551306	7.1640544	7.4070587	6.4200225	6.518166	6.333508
"A_23_P134994"	6.4289265	6.618942	6.8229904	6.9854503	7.1115265	6.653452	7.153925	6.3457575	5.220051	5.825388
"A_23_P135007"	1.574719	1.8624437	1.5911217	1.6136494	2.3572485	1.6137247	1.5823948	1.6287934	1.5880599	1.6020001
"A_23_P135015"	5.9861116	6.253163	6.39509	6.3656015	5.192502	5.9348087	6.2066317	5.521335	5.8083096	5.9396844
"A_23_P13502"	12.96703	13.160128	13.113693	12.935958	12.817558	13.041394	13.065342	13.082165	13.143614	13.195304
"A_23_P135031"	10.925611	10.457127	10.712609	10.616761	10.021995	10.386858	10.118944	10.054153	10.650581	10.323569
"A_23_P135061"	9.121223	7.4643154	8.281693	7.595522	9.272891	9.519411	8.171249	9.709978	9.059624	9.010624
"A_23_P135063"	7.011359	7.0749702	5.118372	7.5825486	7.1796913	6.3457575	7.394918	6.7497406	6.1321917	5.596355
"A_23_P135079"	8.849151	8.91395	8.891438	8.832266	8.514173	8.599932	8.334839	9.612903	9.889363	9.603901
"A_23_P135084"	17.37422	17.114296	17.893875	17.3366	17.087639	17.260965	16.943348	17.087639	16.77017	17.077492
"A_23_P135104"	12.740572	12.491421	12.570646	12.347834	12.616119	12.543664	12.617297	12.351561	12.291605	12.150415
"A_23_P135123"	8.067727	8.135423	8.754482	9.221041	9.483511	8.188508	8.627062	8.490611	9.944448	10.264278
"A_23_P135132"	2.948346	4.2960014	4.3320265	4.621902	4.538592	4.133629	4.8812547	3.1598454	4.639252	5.3038855
"A_23_P135157"	8.827159	8.968826	8.927837	8.766166	8.744897	8.773488	9.15335	8.6315775	8.901263	8.930653
"A_23_P135164"	8.603127	5.62209	8.824595	5.3873534	8.802676	9.689409	9.425587	8.382177	8.165914	7.7589216
"A_23_P135184"	8.879317	10.67854	11.238915	10.564443	9.937092	11.951855	8.676266	11.464368	11.40773	11.018865
"A_23_P135190"	7.288861	9.178602	9.32371	8.996894	8.370419	10.525154	7.127783	9.353264	8.583729	8.934095
"A_23_P1352"	2.3576424	1.5200981	2.9820006	1.5949994	1.5256891	1.546591	1.5645976	2.4938438	1.9058315	1.5309618
"A_23_P135219"	4.0996428	4.151864	4.0690413	4.1157246	4.1411114	4.7804775	4.250676	3.637573	3.8811123	3.2374842
"A_23_P135226"	3.7746148	1.9937912	3.2925985	2.881764	2.2898374	3.3091333	2.8368855	3.3787196	3.2177079	4.1573343
"A_23_P135239"	10.629544	9.700202	10.245002	9.869992	11.086022	9.898742	10.149887	9.954382	10.685365	10.965414
"A_23_P13524"	11.170095	11.127121	11.549547	11.165527	11.2045965	11.219887	11.35646	11.228568	10.953491	11.196603
"A_23_P135248"	5.8522863	4.597554	5.4393315	4.683665	6.1664133	7.3598166	5.7275076	7.37911	7.299096	6.67936
"A_23_P135257"	4.663358	5.107307	4.896399	4.943663	5.1661634	5.1443605	4.7834425	4.762792	5.1917653	4.9031897
"A_23_P135271"	7.0465612	6.4291344	6.0483875	6.3987727	7.308954	7.273214	7.1683965	7.276998	6.694536	7.3020396
"A_23_P135273"	10.581009	10.3466425	10.37542	9.624943	9.807464	10.761949	10.071665	10.521658	10.8248	10.582027
"A_23_P135294"	6.0685043	5.9953346	5.781947	6.0406923	6.3396716	6.4951005	6.187234	6.716807	6.8505626	6.858706
"A_23_P135310"	7.961959	8.052204	8.1772585	8.067947	8.3273735	8.707572	8.255706	7.5864725	8.392935	8.068728
"A_23_P135315"	10.73727	10.144869	10.269759	10.045868	10.007114	10.108401	10.238188	10.278686	10.608117	10.552631
"A_23_P135326"	10.552097	10.623249	10.511623	10.618111	10.079466	10.288486	10.005886	10.196138	9.599598	9.994529
"A_23_P135342"	13.611266	13.830375	13.666076	14.015232	13.623	13.890778	13.867918	14.289549	14.30985	14.291948
"A_23_P13535"	4.5521035	3.9723608	4.3357506	4.403313	3.453516	4.671463	3.8989716	4.53707	4.283261	4.23396
"A_23_P135357"	8.806215	8.71755	8.887211	8.678036	8.729042	9.223223	9.292239	8.707342	8.844116	8.518917
"A_23_P135364"	8.5311575	8.602849	8.6003895	8.082953	8.3125925	8.40435	8.717301	7.7743344	7.7036057	7.9251623
"A_23_P135381"	1.8691325	9.850172	4.3609533	8.307493	4.0126667	7.570785	2.290094	7.7842617	6.290435	2.2838132
"A_23_P135385"	5.338669	6.9934998	5.66889	6.945531	6.859273	7.741066	7.9826345	5.550479	5.5943923	5.6409354
"A_23_P135417"	1.767694	2.2534025	1.8848413	2.227558	5.2213917	2.0811832	4.455649	1.9259818	1.791664	1.9630342
"A_23_P135437"	10.103974	10.111079	10.28587	10.474072	10.031083	10.335255	10.015233	10.259764	9.763859	10.593956
"A_23_P135454"	8.723652	9.211797	9.048801	8.83862	8.660366	8.777852	8.885098	8.507933	8.5116	8.511299
"A_23_P135465"	8.457218	8.347299	8.230714	8.226846	8.002804	8.39753	8.805013	8.9125805	8.5532055	8.716515
"A_23_P135474"	10.14071	10.64771	10.420403	10.103765	10.292622	10.213273	10.700634	9.970287	10.114781	9.800297
"A_23_P13548"	1.6465883	1.6333973	4.5181894	4.859898	7.2339864	1.7508361	1.7323607	3.6709356	1.6489445	1.7041425
"A_23_P135486"	5.904114	5.1531215	4.674764	5.2994823	5.420254	5.3292365	6.0316916	5.433181	4.573699	4.647835
"A_23_P135494"	9.923327	8.775152	9.419294	9.647836	10.431607	9.645065	9.148017	10.448441	9.3263855	9.551907
"A_23_P135499"	8.400345	7.357262	7.958376	8.181943	9.092575	8.315394	7.642346	8.717301	6.6276226	7.537407
"A_23_P13554"	11.267359	11.081352	11.136433	11.743358	11.357742	11.370291	11.539997	11.775297	11.9302845	11.781978
"A_23_P135548"	9.285937	9.444294	9.246637	9.319678	9.857571	9.875536	8.889253	8.612908	8.116464	8.789967
"A_23_P135568"	10.209502	10.623849	10.299716	11.201743	11.25207	11.161265	10.461197	10.033854	10.016347	10.010771
"A_23_P135576"	4.7786045	8.370027	4.935834	5.760526	4.103764	2.2232614	6.1577673	9.241742	5.2095313	4.4236093
"A_23_P135589"	4.6048236	4.7914104	4.9179068	4.507412	4.3219156	5.083964	5.0307636	4.647835	5.192921	4.22796
"A_23_P135595"	5.6485877	5.809413	5.9223447	6.086138	5.3461637	6.3434305	5.67973	5.506947	5.069813	5.1576576
"A_23_P135611"	10.324229	10.385483	9.893172	10.225492	10.220496	10.359006	9.694348	10.085558	9.78228	10.0099535
"A_23_P135616"	10.815498	10.8823395	10.795415	10.6982565	10.846007	10.830221	10.841965	10.779052	10.601313	10.997993
"A_23_P135634"	14.388665	16.139458	14.940785	16.380142	15.276716	15.180325	15.113913	15.138781	15.2265005	15.1961775
"A_23_P135646"	2.6642532	1.9332201	1.5493455	1.560269	3.680295	1.560669	3.6794217	1.5657336	1.5366575	1.5469853
"A_23_P135669"	1.9091501	1.8498845	2.0787666	3.3773603	2.0336463	2.378257	2.1594372	3.8893685	4.310917	5.264528
"A_23_P135722"	7.871121	7.5306077	7.7217712	7.94335	5.904114	5.4757648	5.6860986	7.095479	7.350892	7.018337
"A_23_P135730"	10.179333	9.881901	9.801335	9.732398	9.567556	9.499338	8.9989395	9.5418825	9.069138	9.395742
"A_23_P135742"	3.693436	3.033889	2.975883	2.8571405	4.24002	3.5213995	4.142943	3.551516	5.1977487	3.2592752
"A_23_P135755"	6.1446624	7.393336	4.6899395	6.156391	8.723652	7.217865	9.794522	4.544081	3.7356205	3.3076105
"A_23_P135769"	12.457383	12.594893	12.386892	12.357089	12.754233	12.309705	12.621769	12.633716	12.970272	12.564005
"A_23_P135778"	10.908686	9.721168	10.8669405	9.414322	9.875775	10.347056	10.71182	10.820559	11.222251	10.808586
"A_23_P135787"	7.2368736	8.280029	7.54146	8.142711	7.5119395	7.8475604	7.582004	7.30235	6.568816	6.98448
"A_23_P135826"	9.1451435	8.978299	9.545996	8.883627	9.186991	9.439721	9.612903	7.968357	8.744435	8.330595
"A_23_P135848"	8.30954	7.911232	8.123128	8.07561	7.7650332	8.743194	8.11095	7.628533	8.941355	8.318631
"A_23_P135857"	7.2361813	7.468322	6.7157917	7.4410934	6.834583	7.305474	6.845628	8.293228	7.9925165	8.315862
"A_23_P135878"	8.690855	8.332001	8.527512	8.352593	8.920504	8.844116	9.099962	8.555861	8.142514	8.40077
"A_23_P135914"	10.486183	11.073571	10.974619	11.115538	10.572042	10.8841715	10.181049	10.861796	10.800665	10.728838
"A_23_P135926"	3.1201756	3.4514174	2.978787	3.0676725	3.0660465	3.437747	3.5109787	3.3186836	3.805818	3.1206582
"A_23_P135948"	1.7528691	4.2654977	1.55089	1.5659621	1.5473162	1.5615128	1.5493455	3.246553	3.648337	4.340345
"A_23_P135966"	12.10647	13.044664	12.182943	13.142528	11.680983	11.84777	11.588143	12.433298	12.325782	12.227043
"A_23_P135977"	11.00412	11.095128	11.01815	10.939984	10.624132	10.711254	10.845798	10.794111	10.415925	10.483446
"A_23_P135990"	10.008259	8.040935	8.234566	7.5173364	8.480499	6.479776	7.900393	10.833991	9.507933	9.943355
"A_23_P135995"	11.387418	11.718313	11.485853	11.57196	11.659794	11.743794	11.632645	11.236369	11.1310005	11.269167
"A_23_P136012"	10.718305	10.969404	10.952476	11.157827	10.815498	10.912847	11.041837	10.363826	9.70955	10.287958
"A_23_P136013"	11.412673	12.10412	11.688828	11.946964	11.542715	11.363018	11.512016	11.812669	12.293597	11.835016
"A_23_P136026"	9.742067	5.3473063	7.7657323	5.201097	12.401754	5.719832	8.065687	8.399634	5.7922916	5.0466247
"A_23_P13604"	14.857711	14.989991	15.017791	14.969314	15.180325	15.326196	15.44365	15.022525	15.456683	15.255577
"A_23_P136041"	5.363784	2.854758	5.2757754	4.7433243	4.732078	1.623317	3.363424	6.4630084	6.7070336	5.832319
"A_23_P136058"	10.487972	10.456644	10.531514	10.750102	10.492039	10.448441	10.674983	10.569462	10.481396	10.479614
"A_23_P136077"	4.239318	5.919484	5.209128	5.525285	4.9597583	5.916312	6.3731165	4.452696	3.545369	4.949389
"A_23_P136085"	5.334368	3.6506157	2.9998949	1.5248095	3.6221306	3.2932198	1.5269136	2.4066007	5.588197	3.3223429
"A_23_P1361"	9.911926	10.410581	10.093897	10.707879	9.604906	9.514262	9.594315	10.545826	10.248557	10.480914
"A_23_P136116"	3.3181307	3.4726377	1.7619106	2.8418458	9.806327	11.688432	10.525154	4.9846582	5.644544	5.90621
"A_23_P136125"	1.6084116	1.5967829	1.6422377	1.6730663	1.6372466	1.6762805	1.6244214	1.6676677	1.6214445	1.6492002
"A_23_P136135"	7.176892	7.339226	7.540154	7.3631034	7.9063945	8.705669	8.339414	6.3515773	5.8730464	6.3233066
"A_23_P136172"	8.895194	8.7502775	9.105754	8.609905	8.994317	9.15335	9.188955	8.801104	8.711839	9.033222
"A_23_P136173"	6.2683926	6.6731844	5.8122554	5.460774	8.244779	6.9784927	6.563533	5.5249543	4.281011	4.7921896
"A_23_P136184"	6.032462	6.1193104	5.9204636	6.2017784	5.791587	6.148813	6.289349	5.6125383	5.9372473	5.7059746
"A_23_P136196"	8.809281	8.601128	8.659792	8.933489	8.929623	9.412383	9.570971	9.085453	9.171546	9.019572
"A_23_P136232"	8.772075	8.48982	8.564516	8.423832	8.38137	8.582843	8.483394	8.4301605	8.612553	8.483605
"A_23_P136238"	11.111601	10.995137	11.110894	10.966811	10.829792	11.071788	11.173777	10.541763	10.289211	10.559828
"A_23_P136246"	1.5519142	2.5075302	5.428937	3.0529308	1.567526	1.577782	3.0769944	3.5814056	1.571041	3.5033393
"A_23_P136254"	3.7098079	3.6216283	4.857275	3.1467063	5.3731604	3.978728	3.4281588	6.38658	4.9814167	5.2385035
"A_23_P136296"	6.2895527	6.602686	6.1721644	6.031251	6.3614855	6.255617	6.392364	6.211253	7.1350985	6.4987354
"A_23_P136310"	4.1012173	4.70772	4.072128	4.4107847	5.2602425	6.2658277	5.3866014	4.688937	4.9811068	5.2350793
"A_23_P136317"	8.879983	8.742721	8.694424	8.535552	8.490611	8.693618	8.5022335	9.016395	10.308447	9.341246
"A_23_P13632"	9.949096	9.952283	10.193375	10.012522	10.146463	10.008652	9.914782	10.050125	10.827464	10.139445
"A_23_P136325"	7.0922604	6.8511047	7.064322	7.193674	7.0111346	7.3826084	6.2169027	7.053171	7.2181187	7.4103904
"A_23_P136347"	10.927666	11.571521	12.209568	12.36074	10.991553	9.4532795	10.230243	10.381693	9.575087	9.653512
"A_23_P136355"	9.034719	10.150598	9.105426	9.693086	9.257925	9.163555	10.079466	8.860344	8.976849	8.704839
"A_23_P136371"	1.5241637	2.2261322	1.555039	1.5925428	9.8741455	9.592237	5.0648947	3.8614135	4.950576	5.0179324
"A_23_P136392"	1.7661245	1.7610208	1.9318749	2.123761	1.8199766	2.2010365	1.9064922	1.992695	1.7790593	2.9941425
"A_23_P136405"	7.290678	6.860282	6.572919	6.8934135	7.6836085	6.82581	7.538894	8.22807	8.062068	8.220893
"A_23_P136413"	9.79584	10.0758505	9.119869	9.693777	9.225782	9.453519	9.694225	10.084981	10.226269	9.918228
"A_23_P136433"	4.77792	3.322123	3.3922887	4.491677	1.6420045	1.6897185	1.6723635	4.919805	5.442833	4.484216
"A_23_P136460"	10.315752	10.207485	10.506057	10.122309	9.930613	10.203727	10.21359	9.808888	9.554683	9.432486
"A_23_P136478"	8.639238	8.349299	8.173539	8.067727	8.324074	8.359327	8.112637	8.326859	8.18551	8.07001
"A_23_P136493"	7.6907454	8.705669	8.179405	8.1497755	7.410221	8.255937	8.43959	5.862038	6.4262457	6.2803216
"A_23_P136504"	5.351237	5.5229945	6.151793	6.092005	4.8127003	4.879312	1.6862398	5.7834845	6.5059967	5.955648
"A_23_P136547"	10.62348	10.8857155	10.336603	10.9433155	10.66954	10.802807	10.863857	10.720269	10.28587	10.457127
"A_23_P136552"	7.8781843	8.311695	7.0688543	8.041536	8.088548	8.698412	8.6107	7.907017	7.169607	7.9258056
"A_23_P13657"	7.6696935	7.9519606	7.8328094	7.2845216	7.761312	8.522518	8.968448	7.6199193	8.831164	7.8750954
"A_23_P136571"	1.5905801	2.2157655	3.3678293	3.2560804	2.81072	1.6301211	1.6029043	2.5502253	2.0942664	1.793447
"A_23_P136573"	9.638369	9.422837	9.808134	9.596852	8.683832	6.778764	6.833782	10.150693	9.463578	9.055354
"A_23_P136589"	1.8515589	1.8271849	2.062932	2.4155307	1.9512038	2.2747645	2.1251252	2.1031933	1.8464143	2.1701863
"A_23_P136595"	7.524447	7.394177	7.74662	7.5335793	7.1064563	7.2323647	6.890618	7.7225575	8.122831	7.657565
"A_23_P136619"	2.3964725	4.572197	4.412824	4.2971506	3.613059	4.707224	4.933339	4.36997	4.3503838	4.908625
"A_23_P136623"	10.553673	10.273577	9.843723	10.103435	9.820471	10.309183	10.665422	7.564886	7.184184	7.919161
"A_23_P13663"	13.036195	13.331789	14.195793	13.908765	13.095609	12.614226	12.280042	11.549547	12.736132	12.175307
"A_23_P136635"	10.461197	11.057127	10.860077	11.176852	10.315453	10.810129	10.726301	12.3274765	11.521459	11.6476
"A_23_P136671"	1.5580387	1.5458107	1.5881431	1.6261518	1.5657336	1.5873753	1.5847068	1.5724901	1.5657336	1.5715294
"A_23_P136683"	12.214072	7.546554	8.326069	7.035488	11.24785	9.39316	10.382398	10.2320595	7.2959704	9.04561
"A_23_P136693"	11.767227	12.198842	11.995857	11.815077	12.010035	11.981408	11.868077	12.020412	12.064117	12.17172
"A_23_P136721"	7.899338	7.353496	7.2807255	7.5517645	7.185238	7.705601	7.4454155	7.027608	7.5718856	7.071144
"A_23_P136724"	4.367805	2.87354	1.5300255	4.068727	2.797828	2.2655199	4.9464607	2.5855362	1.5305263	1.5338107
"A_23_P136734"	4.543353	4.6564875	4.07112	4.248215	3.3166459	4.2960014	4.3565936	3.437747	3.7497413	3.12512
"A_23_P136753"	7.8685107	8.138284	8.08471	8.017702	8.065687	7.980424	9.254103	9.142511	8.844362	8.968599
"A_23_P136777"	8.278752	6.4098597	6.3955894	2.241704	7.822471	2.0848641	5.0847054	8.5446005	7.7976775	6.655655
"A_23_P136786"	4.768619	5.5626698	4.5644894	4.4089813	4.55469	5.3587523	5.1383457	4.061793	4.5214825	4.6772857
"A_23_P136787"	5.3974977	6.2412157	5.449595	5.233069	5.3393564	5.5597577	6.365977	5.436264	4.754803	4.76054
"A_23_P13679"	7.1877723	7.151305	6.998211	6.5285	6.677458	6.401415	6.4328938	6.8799567	7.3483725	7.2877145
"A_23_P136805"	3.555403	5.548108	4.2992573	5.658839	5.005912	5.0944266	5.4888916	4.593546	3.8176482	3.99911
"A_23_P136817"	7.687842	8.726414	8.35955	9.260565	7.750949	7.7090592	8.336172	7.1934867	7.150897	7.331818
"A_23_P13683"	6.167632	5.921085	5.9341636	5.8916044	5.6388063	6.120832	5.199219	5.1158586	4.8232517	5.1341496
"A_23_P136832"	1.5065897	2.3592362	1.5240463	2.7361982	1.5068905	1.5197079	2.2727222	1.5002484	1.5023569	1.5081347
"A_23_P136849"	7.333993	6.6443987	6.7272987	6.5583954	6.874805	6.399518	6.9439087	7.336771	7.0092125	7.7149186
"A_23_P136857"	2.2593725	3.346954	2.5080585	3.9917653	2.3102546	2.4038794	3.6379821	3.8676465	3.2964022	3.7689502
"A_23_P136870"	5.9170117	6.847079	6.31736	6.5511317	6.380703	6.484224	6.484224	6.430973	7.5993814	6.700254
"A_23_P136874"	7.999626	9.041088	7.9907646	8.800294	7.694466	8.142118	7.9416127	7.6985335	8.603339	8.056806
"A_23_P136909"	8.743091	9.2527685	8.2851925	9.38259	8.884647	8.346009	7.6898365	8.871329	9.357147	9.941093
"A_23_P136916"	12.137219	12.767712	12.159501	12.938782	12.1744	12.4933	12.563067	11.785954	11.905023	11.633928
"A_23_P136936"	9.999619	11.72141	9.973245	10.9509945	10.105065	10.543403	10.133682	9.557332	9.688517	9.9191475
"A_23_P136959"	2.0496774	1.8930669	1.6857104	1.6779581	2.0517776	1.7380186	1.6349132	1.6981368	1.6429334	1.7135824
"A_23_P136961"	10.0737505	10.658545	10.207485	10.4464655	10.189646	10.1826935	10.056124	10.90586	11.55038	11.002737
"A_23_P136964"	9.090999	9.780712	8.274393	10.005089	9.503854	10.839849	10.959094	10.247784	9.559356	9.97107
"A_23_P136978"	6.034453	5.8412075	6.380703	6.7790346	5.9798117	4.2365346	4.4421654	6.5626388	7.346333	5.781447
"A_23_P136986"	8.6772	10.221094	9.762355	10.393291	9.13836	8.872382	8.918264	8.704049	9.735392	8.9008875
"A_23_P137007"	1.6065618	1.5870254	2.2979562	1.6829795	12.962236	2.4096408	1.629042	1.6451765	1.9182534	1.6421392
"A_23_P13701"	11.342624	11.373712	11.261033	11.712451	11.73986	11.645491	11.617798	11.615595	10.941503	11.708271
"A_23_P137016"	13.779886	12.83044	12.346996	13.073696	13.36693	11.727009	12.619839	13.830375	14.163146	14.033197
"A_23_P137031"	9.2548	10.183992	9.201317	9.78928	9.502687	9.479609	9.5205345	9.0694065	9.440073	9.053227
"A_23_P137035"	10.936615	12.8275175	10.393291	12.20108	10.98194	10.806613	11.703422	11.243842	11.663132	11.274507
"A_23_P137046"	10.138925	10.119548	9.596512	10.033284	10.065652	9.895683	9.852165	10.181768	10.18123	9.9785185
"A_23_P137057"	12.885945	13.922472	13.601663	12.988523	13.396255	13.28708	13.616066	13.101003	12.31387	13.068685
"A_23_P137073"	10.168523	11.194132	10.52743	10.967611	9.899205	10.633198	10.429022	8.685625	8.650087	8.860844
"A_23_P137097"	10.480531	10.296021	9.9048815	10.550876	9.23657	8.836608	8.068877	10.838645	11.826269	12.023341
"A_23_P137103"	12.070308	12.950254	12.728618	12.8480625	13.389806	13.058464	11.751576	12.864685	13.121878	12.992673
"A_23_P13711"	7.0914197	7.2458305	6.7615137	6.8766365	6.9024205	7.080011	7.1344223	6.4672837	7.0484476	6.571635
"A_23_P137116"	4.488478	4.861931	3.9330835	4.22796	3.1693769	1.5901108	2.5718093	4.11518	3.7939954	3.498382
"A_23_P13713"	8.564364	5.0179324	7.3254976	6.5358915	5.631873	12.432447	8.209807	8.831164	9.601428	9.301373
"A_23_P137139"	4.6369753	4.578496	3.5394459	4.0442305	5.7059746	4.340345	5.3070183	3.4996023	2.1862326	3.1023061
"A_23_P137143"	11.266669	11.798124	11.132519	11.965796	10.840193	10.819935	10.907075	11.321457	11.175733	11.177464
"A_23_P137157"	6.155701	5.3658123	5.1383457	4.9313707	5.9071517	5.5096564	5.8578496	5.2313232	5.2580485	5.0480466
"A_23_P137168"	3.1143656	3.1810393	2.6127307	1.5286388	5.2884693	2.965269	2.523753	3.0203266	3.642924	3.4445343
"A_23_P137173"	6.124545	5.895426	6.4692745	6.297721	7.6789045	6.796432	9.201479	8.206	4.861679	7.2695866
"A_23_P137196"	9.831495	11.041837	9.965639	10.7465925	9.956367	9.142511	9.846431	9.820645	9.736159	9.792347
"A_23_P137209"	11.405068	12.681453	11.478453	12.288949	11.673194	11.655982	11.772112	11.013979	11.15658	11.170095
"A_23_P137226"	5.381653	6.444748	6.0322313	6.335057	1.6262621	1.6730663	1.5955462	5.3447204	5.1461086	5.5340543
"A_23_P137238"	10.314635	9.999619	10.368533	10.109628	4.1304154	4.7288218	4.1348896	10.120592	9.9644575	9.984762
"A_23_P137248"	7.2695866	6.745574	6.828647	6.832563	6.439788	6.5375133	5.54691	6.9891977	6.9353857	7.058545
"A_23_P13725"	1.5806047	1.5732912	1.6151547	1.6036515	1.6032354	1.6518427	1.5827016	7.1376085	3.722591	4.9444184
"A_23_P137276"	10.481832	10.461943	10.464487	10.29061	10.224299	9.842492	9.820782	11.198718	11.347069	11.149238
"A_23_P137361"	9.196196	9.166272	8.980619	8.915758	9.057474	9.131716	9.047506	8.903736	8.750439	8.755704
"A_23_P137366"	14.134309	12.378325	12.513053	11.33533	13.702476	13.010333	13.504096	12.048075	12.0110655	11.483684
"A_23_P137381"	11.713891	10.335962	9.859305	9.680137	11.938034	9.21715	10.827464	12.425026	11.379297	12.382853
"A_23_P137391"	12.230262	12.1239	12.236847	11.873749	11.859228	12.053106	12.239217	11.974222	11.920383	12.049977
"A_23_P1374"	3.7771814	2.6172876	4.555823	5.3980484	7.8001685	6.7613525	8.773056	4.725425	4.3290434	3.2932198
"A_23_P13740"	6.0267677	5.993653	8.4815855	7.8170357	9.069907	9.426823	9.453798	8.3640375	8.294151	8.014765
"A_23_P137403"	9.1241865	9.292876	9.11927	9.319815	9.004719	8.9498625	9.09836	8.392935	7.729	8.290877
"A_23_P137410"	5.1456594	4.3274035	7.7498603	4.833756	7.22497	6.165228	6.4565473	7.5145826	8.685091	6.6077437
"A_23_P137423"	10.115075	10.497005	9.65301	10.172989	9.309311	10.16382	9.515485	8.100466	8.711152	8.462654
"A_23_P137427"	12.164581	11.532153	12.016584	11.866968	12.000287	12.096438	12.5786085	12.451786	12.362022	12.396115
"A_23_P137434"	13.471385	13.472124	13.718589	13.642862	13.594512	13.455695	13.652708	13.3037615	13.272918	13.478682
"A_23_P137470"	9.324063	7.751096	8.31428	8.2907	8.592979	7.268957	8.544455	9.631625	9.101222	9.394341
"A_23_P137484"	4.9359856	1.8956828	5.7739906	8.90187	4.3957453	5.773663	4.07093	6.771675	5.0223403	4.7188
"A_23_P137503"	7.582004	8.31428	7.328723	7.954851	7.4021945	7.3577056	7.57009	6.577846	7.1772523	6.757603
"A_23_P137504"	6.242379	7.264015	6.0808964	6.310716	6.0932236	6.1330347	5.9908504	6.4749317	7.3187523	6.3471303
"A_23_P137514"	10.094131	9.343312	9.632082	9.531978	10.016991	9.8832035	10.286103	10.057365	10.4628935	10.397442
"A_23_P13753"	6.7919025	6.0340886	5.250308	7.1367893	8.04988	6.471473	8.778931	7.0508757	7.153172	7.049856
"A_23_P137532"	10.258423	8.953357	10.056747	10.261222	10.328734	10.756667	10.988283	9.369307	9.803256	9.74714
"A_23_P137543"	11.246816	10.796363	11.249936	11.153608	11.543808	11.625655	11.601948	11.03944	10.724068	10.778742
"A_23_P137573"	4.335282	6.3469324	5.6418138	9.086751	1.6668268	1.7178254	1.6823864	8.037729	5.501745	5.5001316
"A_23_P137578"	8.550738	8.041329	8.619965	8.176508	8.261085	8.449345	8.371576	8.1727915	7.785816	8.240606
"A_23_P137586"	9.3174305	9.0536375	9.139641	8.984267	9.150295	9.003939	8.834532	8.965404	9.307881	9.005326
"A_23_P137630"	8.720175	8.63867	8.571812	8.446241	8.5446005	8.650225	8.661934	8.425819	9.103582	8.738791
"A_23_P137634"	9.941832	8.669054	10.096911	8.993668	9.145028	9.635093	9.621037	8.795751	9.448572	9.9294615
"A_23_P137665"	11.865219	6.1688166	11.3094845	8.947996	11.997684	6.0180354	6.899327	11.960821	8.462897	7.0129766
"A_23_P137689"	7.165151	6.5824327	6.9799995	6.9469724	8.738791	7.2909155	7.507317	7.136508	6.7299705	6.601763
"A_23_P137697"	6.3231297	5.455512	7.0721297	4.4489717	8.695954	3.6536405	5.714619	6.9392285	6.7253113	5.357111
"A_23_P137705"	10.609963	9.502118	8.761659	9.378362	13.642862	15.693423	15.971671	11.020414	12.915205	13.963218
"A_23_P137715"	10.212897	10.137474	10.092166	10.10786	10.003219	10.147843	9.804043	9.823695	9.542475	9.659939
"A_23_P13772"	6.4047904	3.571783	6.103892	5.2602425	7.485865	2.6668289	3.7689502	9.575087	7.5255556	7.8905673
"A_23_P137731"	8.113929	8.143603	8.560687	8.371079	8.1848345	8.440954	8.634189	8.335126	7.662627	8.175013
"A_23_P137751"	7.864075	7.710184	7.512972	6.6837764	6.3205533	5.3627944	4.8075056	6.3479395	7.3390913	8.1632
"A_23_P137765"	6.543018	6.688752	6.5606627	6.5011883	6.352597	7.023981	6.9928894	6.4110026	6.2032523	6.797066
"A_23_P137786"	8.703497	8.6825485	8.428044	8.278384	8.721234	8.3297415	8.051316	8.944707	9.3500595	9.018803
"A_23_P137797"	3.4071627	9.127122	9.268201	8.665654	4.818102	2.2610865	1.7285943	7.302188	8.897839	8.311839
"A_23_P137806"	8.700947	8.342341	9.650967	8.53379	7.5258546	8.064765	7.689167	7.833683	7.4638214	8.134783
"A_23_P137814"	13.226034	13.608098	13.422244	13.480442	13.341504	13.556954	13.692278	13.246037	13.329946	13.185209
"A_23_P137825"	6.0366826	6.1452208	5.822901	4.870752	5.022646	5.634298	5.326215	5.787406	6.5453534	6.499046
"A_23_P137830"	13.84305	13.758651	13.98803	13.50511	14.013799	14.058197	14.291948	13.531219	13.695642	13.53945
"A_23_P137837"	6.1399674	6.505447	6.8281198	6.1986165	5.4983416	6.216037	6.132817	5.948155	6.0330195	6.099164
"A_23_P137848"	11.144887	11.680685	11.848328	11.792713	11.534156	11.343107	11.341131	11.343916	11.774002	11.583588
"A_23_P137856"	6.8128753	5.279823	5.871076	5.4286337	6.462647	5.5090704	5.9900713	6.8844123	6.473298	6.1477714
"A_23_P137865"	9.982479	10.201818	10.149623	10.192146	10.342806	10.387504	10.680383	9.769753	9.820471	9.58731
"A_23_P137876"	9.12087	9.861347	9.050243	9.881045	9.47559	10.034041	9.729824	9.034719	9.619442	9.735392
"A_23_P13789"	3.8015888	4.195113	3.3007975	4.774999	4.7369385	5.2773128	4.930466	5.2168684	5.269673	5.1803217
"A_23_P137896"	3.1322265	1.6403956	3.8788257	4.1192408	2.862733	1.7539308	4.1173806	2.9333084	2.6202846	4.258138
"A_23_P137909"	15.298958	14.74561	15.051258	14.349058	15.017791	14.5929785	14.613234	14.258351	14.764369	14.576068
"A_23_P137923"	4.3631797	4.82655	4.674487	4.663358	4.002361	4.5555897	4.1769805	4.313532	4.7235737	4.388422
"A_23_P137931"	6.688752	6.389476	5.286811	4.440217	7.4017606	7.1246605	5.574162	6.070321	3.3658612	4.901213
"A_23_P137935"	6.90061	6.7731915	5.399159	6.0340886	8.651155	6.960685	9.065066	6.1548715	5.248419	4.962223
"A_23_P137948"	14.261809	14.658575	14.440421	14.419597	14.1975975	14.155328	14.629469	14.098779	14.71247	14.595324
"A_23_P137957"	6.5944624	6.696761	6.8171496	6.5447564	6.603847	6.6494064	5.8354435	6.4453554	6.1723175	6.295896
"A_23_P13797"	7.000856	7.331818	7.3177786	7.3306794	6.762971	6.873419	7.5326004	6.5425987	5.54691	6.05347
"A_23_P137984"	10.99286	7.3362765	10.0492935	8.011111	10.826359	8.396593	8.905389	10.634851	10.764321	10.771143
"A_23_P138000"	9.880787	10.136088	10.293533	9.284276	8.978091	9.101222	8.611391	8.941851	9.920918	9.074788
"A_23_P138023"	9.414643	9.744276	9.456137	9.876417	9.292026	9.92599	10.105377	9.785034	9.828228	9.834333
"A_23_P138025"	10.465133	10.964636	10.737662	10.804039	10.483106	10.816994	10.975134	10.0054655	9.947949	9.913053
"A_23_P138049"	5.6884875	5.6130943	5.8169947	5.4243793	5.32662	5.6456494	2.7809887	5.9317427	6.47029	6.111989
"A_23_P138058"	9.308083	9.339152	9.405156	9.684676	9.286539	9.426052	9.962385	9.226787	9.643984	9.220013
"A_23_P138089"	3.6273365	3.807833	2.8656876	1.6989766	2.8656876	4.840067	4.335282	3.4115748	3.8739274	3.3933544
"A_23_P138099"	6.8688517	6.869603	7.088029	7.0929685	6.8319983	7.001531	7.3840013	7.2810335	7.320502	6.8852534
"A_23_P138105"	7.3849564	7.1823196	7.408479	7.3390913	7.290678	7.657565	7.6049924	6.971935	5.457024	6.7479157
"A_23_P138117"	11.78879	12.292338	11.950006	12.122524	12.298935	12.229218	12.994271	12.036596	12.27812	12.46459
"A_23_P138125"	5.449113	5.73136	6.2194223	6.5357013	5.977216	5.6725616	6.9679203	5.1215453	5.4060764	5.537869
"A_23_P138137"	9.850479	10.542068	10.765201	10.186625	9.6723585	9.704105	9.794267	9.726552	9.69881	10.02736
"A_23_P138139"	9.860438	10.4877205	10.768385	10.149302	9.604081	9.476395	9.755015	9.703917	9.643661	9.652074
"A_23_P138157"	5.492298	5.7609296	5.3238397	5.6801105	4.8862314	5.314762	5.7606688	5.7651973	6.0782957	5.61983
"A_23_P138168"	10.478154	11.654671	10.494108	10.401342	10.020381	8.384314	8.150735	10.383515	10.30097	10.775629
"A_23_P138194"	8.040935	5.9917893	5.561514	5.714329	8.4110985	6.591753	8.052204	6.1825256	6.039302	5.5744705
"A_23_P13820"	3.763724	1.541652	1.5457596	1.5360568	1.5481529	2.2582843	3.1652997	4.811967	4.788253	4.3445864
"A_23_P13822"	2.003905	2.7830458	2.8521383	6.7730227	6.473613	2.7361982	2.7498615	8.894802	8.497695	8.189793
"A_23_P138253"	10.271029	10.5105915	10.179018	10.460577	10.165469	10.114781	9.983882	10.3934555	10.55734	9.84546
"A_23_P138262"	1.96353	2.1385844	1.9987041	2.3981981	1.9789635	2.2505653	2.067033	2.0237012	1.8307871	2.073401
"A_23_P138271"	12.089768	12.514736	12.339468	12.345136	12.13597	12.089768	12.091405	11.916371	12.135409	12.050732
"A_23_P138289"	3.0003679	1.9970565	1.7646744	3.4041605	2.8210974	3.8644125	3.9616933	3.4177098	1.5054853	1.5162866
"A_23_P138294"	5.376987	5.67867	5.5057144	4.693587	5.40705	5.3289022	4.8722105	5.174604	5.0310364	4.6946096
"A_23_P138308"	7.0487175	6.2320833	6.2077026	7.1448684	7.1472073	6.3448663	6.71085	8.027929	7.310933	7.3683047
"A_23_P138328"	1.700762	1.6765642	1.7711059	1.939613	1.7197665	1.8015738	1.8100767	1.7106037	1.6680716	1.7085845
"A_23_P138352"	4.0787497	7.408981	6.041848	5.2068706	3.8458047	3.2246237	2.3484938	3.931855	5.0253596	5.8097196
"A_23_P138376"	11.097974	11.809839	11.185051	11.283817	11.812269	11.341131	11.447723	11.8699665	12.611564	11.907791
"A_23_P138394"	8.04536	8.493162	8.642058	8.569418	8.188326	8.021868	8.235179	8.216699	7.8515964	7.8470116
"A_23_P138417"	8.946283	8.133647	8.126947	8.766278	9.101046	7.7157173	8.672388	9.085763	8.034895	8.398362
"A_23_P138426"	6.0652246	6.353466	5.905527	6.013121	6.3914747	6.5354495	7.5047836	7.3501644	7.238454	6.9784927
"A_23_P138435"	11.768299	10.87161	11.659375	11.671226	10.6613455	12.057046	12.152064	11.496626	11.150662	11.448252
"A_23_P138453"	8.427588	8.444529	8.544455	8.537643	7.9998555	8.096817	8.477273	7.6962423	7.211861	7.516701
"A_23_P138461"	5.8368425	5.9357677	6.0915694	5.939018	5.820995	6.223411	6.09688	5.7999325	5.130714	5.759784
"A_23_P138465"	8.039653	8.504005	8.287081	8.325551	8.303599	8.446964	8.497119	8.171249	7.9927483	8.001886
"A_23_P13847"	7.5324063	6.834964	7.1000385	7.029148	7.8170357	8.725884	8.610106	7.901247	7.888516	8.21815
"A_23_P138480"	6.9109282	7.511695	7.3628044	7.3590603	6.9434547	7.851442	7.023981	6.8612375	7.040457	7.0842643
"A_23_P138492"	8.022599	9.436606	9.568761	9.200476	5.045475	7.7793074	7.500787	9.955302	10.058779	9.841489
"A_23_P138495"	6.29937	6.0299873	5.674434	5.8606205	7.8582582	5.9900713	7.164262	7.973034	7.1419606	8.737587
"A_23_P138507"	7.2129536	7.608926	7.7386394	7.94476	6.568816	5.898515	7.902135	7.553304	5.699931	6.9016285
"A_23_P138514"	13.44406	12.992673	13.750172	13.404712	13.453836	13.226034	13.52597	13.234965	13.1080675	13.203951
"A_23_P13852"	13.384802	13.461606	13.667015	13.477731	13.439528	13.254489	13.848994	13.49734	13.481621	13.500093
"A_23_P138524"	9.275043	8.173539	8.425262	7.9923677	11.738981	5.256536	7.4659815	10.646498	11.287855	11.414572
"A_23_P138541"	10.900164	7.288861	8.945664	8.90356	10.280323	6.6138196	7.963252	10.308743	10.6438055	10.303401
"A_23_P138567"	9.241452	9.874395	10.476734	9.452203	8.382177	7.802061	8.811772	8.348282	8.377671	8.241532
"A_23_P138574"	6.380342	6.662075	6.6866894	6.829664	5.989259	6.436988	6.418277	6.5285	7.5319433	7.0301113
"A_23_P138631"	11.574644	11.688432	11.77359	11.493199	11.029476	11.25467	10.830551	11.182054	10.402561	10.967143
"A_23_P138635"	12.555074	12.219335	12.893676	12.29607	12.341012	13.019634	13.841209	13.472124	13.157882	13.170109
"A_23_P138655"	3.2066696	3.44397	4.309203	3.3743832	3.7487261	3.7459476	4.4573874	4.3041415	6.0174847	4.55469
"A_23_P13866"	2.2361908	3.1140537	3.0275602	6.8947268	7.2524347	6.913349	5.902087	6.432727	7.700018	5.6960826
"A_23_P138665"	11.505242	11.3653965	11.187952	11.525947	10.824588	10.495633	11.070104	11.434438	12.110311	11.566191
"A_23_P138680"	7.7769423	6.6871576	6.7479157	6.380703	7.5677576	6.771675	7.3862553	7.719696	6.1505103	6.1195016
"A_23_P138686"	9.558358	8.346958	8.867301	8.414458	9.7378235	9.415095	10.551198	8.942407	8.959457	9.544277
"A_23_P138693"	8.0526	7.260267	7.335471	7.0399895	8.500888	8.1516075	9.15585	7.443098	7.89926	8.253298
"A_23_P1387"	7.558242	7.6394343	7.6488814	7.9915185	8.118936	8.523663	8.241124	7.211114	6.4145474	6.7135663
"A_23_P138706"	9.683519	11.501225	9.946329	10.6588955	9.822613	3.2745397	6.328407	7.1049523	5.191396	7.5501223
"A_23_P138717"	11.792713	10.789799	10.475284	10.173171	12.613705	11.372985	11.302993	11.436128	12.38132	11.540988
"A_23_P138725"	11.099462	10.619013	11.480988	11.111601	11.480988	9.6901	9.686996	12.7798605	12.7379465	12.561022
"A_23_P13873"	11.6638365	11.852976	11.6958885	11.654671	11.703694	12.071337	11.748638	11.441809	11.526805	11.461129
"A_23_P138760"	4.595338	2.4096408	3.7669263	3.0946496	5.1613736	3.5480106	3.4598486	5.167818	5.3782578	5.4812574
"A_23_P138776"	6.725506	8.210844	7.9857197	7.964367	8.102084	8.979357	7.738886	7.5891457	7.5173364	7.278265
"A_23_P138782"	5.0162077	7.1252003	6.887667	6.7398496	6.8866973	8.217467	6.944466	5.9701204	5.3493657	5.7758164
"A_23_P138796"	6.8052034	7.635718	6.234179	8.589567	7.5404463	7.6324654	7.8876195	8.4110985	8.46719	8.169055
"A_23_P138805"	9.533398	9.613057	9.387737	9.826673	10.265902	9.285764	10.108634	10.057096	9.791235	10.057096
"A_23_P138819"	7.4747314	7.9400864	7.7350492	7.408981	7.3356786	7.91051	7.592871	6.833782	6.6844473	6.8791637
"A_23_P138826"	7.5468545	7.819192	7.5231533	7.5872254	7.969436	8.374855	8.153803	7.612012	7.010848	7.4854527
"A_23_P138835"	9.750505	10.153122	9.943805	9.449461	9.284662	9.719425	10.058604	8.834326	8.812558	9.14696
"A_23_P138849"	10.276261	10.185738	10.1786375	9.934115	10.035925	10.247995	10.033284	9.4295225	9.373971	9.300816
"A_23_P13885"	11.297564	11.747578	11.656224	11.873051	11.545542	11.40773	11.4915695	10.361014	10.594986	10.592272
"A_23_P138856"	12.848843	12.70618	12.944434	12.614893	12.772416	12.616387	12.818471	13.004928	13.355781	13.14414
"A_23_P138881"	5.3690867	5.459279	5.449113	4.971663	3.8602314	3.9188032	5.1881647	4.5422277	4.0179467	4.492606
"A_23_P138885"	6.082251	6.998211	6.158969	6.249034	5.768262	5.54212	5.6130943	6.0299873	6.618942	6.559776
"A_23_P138899"	10.777022	11.013656	10.906727	11.130608	10.864521	10.988551	10.856414	10.875179	10.152615	10.800433
"A_23_P138910"	8.404751	8.815056	9.054611	8.604704	7.4981513	8.244779	8.3415365	8.568271	8.587634	8.455587
"A_23_P138931"	1.5345232	1.5452973	1.5551912	1.5896201	7.9736843	1.5465502	2.353461	4.2511125	2.1666884	4.4133887
"A_23_P138938"	3.2914555	8.813285	6.7793493	1.7949867	3.2806506	1.8777486	1.7144278	7.6290655	7.180107	9.668771
"A_23_P138957"	7.4908915	7.285722	7.622096	7.429407	8.18164	8.497467	7.5336885	8.024906	7.5846353	8.04578
"A_23_P138967"	10.436248	10.608835	10.726812	10.464191	10.904783	10.90922	10.741555	10.103435	9.602838	10.11009
"A_23_P138975"	7.5141006	7.224593	7.6735263	7.536078	7.612913	7.624305	7.3106527	7.4786134	6.0853653	7.521405
"A_23_P138985"	6.099423	4.2384315	3.67014	3.7882373	6.9746685	2.8099818	7.3061414	5.465783	6.097219	5.456409
"A_23_P13899"	15.047883	15.302484	15.06033	14.747176	15.736485	15.739101	15.771607	14.503558	14.620554	14.591672
"A_23_P139028"	3.9261467	3.969449	3.4223943	4.68211	2.505258	3.3487709	1.5036851	3.1188679	3.953693	4.307294
"A_23_P139050"	3.5175667	3.7990713	3.645155	3.578322	2.225569	3.2207742	3.7441354	2.6340153	2.3885906	3.2172468
"A_23_P139059"	6.833649	5.606871	5.5876455	5.5177603	5.698853	5.9188867	6.963645	5.9458685	6.143875	6.635239
"A_23_P139066"	8.831274	9.099163	8.414255	9.129258	9.016835	8.982944	9.389827	8.358709	8.730418	8.8237505
"A_23_P13907"	7.483847	5.6045184	6.176972	5.5585523	8.1374655	7.320955	6.9467363	7.5173364	6.8756905	6.74778
"A_23_P139099"	4.8687487	5.085285	4.585659	4.9206767	3.9502246	5.1103992	4.845862	4.2840548	4.479051	4.179968
"A_23_P139104"	9.735576	9.347058	9.2832	9.965298	9.492945	8.831274	9.102695	9.94505	10.486969	9.578937
"A_23_P139123"	8.868989	5.775643	7.666348	6.1973476	8.959769	5.880115	6.8831596	9.007915	7.7894306	8.044676
"A_23_P13914"	8.725184	8.619251	8.845259	8.440486	8.702132	8.679013	9.143026	8.383752	8.171948	8.026416
"A_23_P139143"	9.606657	9.663423	9.829889	9.63693	9.286158	9.652611	8.979253	8.204179	7.592166	8.335363
"A_23_P139146"	10.279406	10.343322	9.448572	11.4405575	10.234931	9.688139	10.559043	7.0299306	9.529821	9.978889
"A_23_P139162"	7.2454348	6.8559327	6.4560595	6.6161785	6.6956153	6.8841205	7.1132245	6.2911797	6.7913113	6.2718005
"A_23_P139166"	3.7673426	5.861192	3.441612	7.9508576	7.2872553	8.082756	6.9298267	9.275513	9.682517	9.06599
"A_23_P139192"	10.424263	9.678574	11.59223	7.935488	8.009558	8.752611	9.062969	9.365383	10.032419	9.45499
"A_23_P139198"	4.436771	4.6903405	4.8763094	4.855461	5.517061	4.6566687	5.6181107	4.8529363	4.534004	4.279866
"A_23_P139207"	10.971108	12.48313	11.861919	12.092773	11.092832	10.812773	11.11302	10.687391	10.777022	10.921023
"A_23_P139228"	10.335113	11.065123	10.519472	10.952476	10.898734	11.1384735	10.989437	10.774487	10.824338	10.689888
"A_23_P139250"	3.7173903	3.3976197	4.510365	3.7766373	3.5732694	4.3384695	3.7326672	2.7380881	3.3541226	2.7108266
"A_23_P139260"	10.393291	9.364624	8.873245	8.940041	8.977744	8.74978	8.685091	9.806871	9.668057	8.918856
"A_23_P139265"	9.032054	9.38607	9.412968	9.115224	9.9191475	9.9382305	9.972202	9.21261	8.687634	8.765975
"A_23_P139277"	7.7639723	7.9833913	7.9565163	7.6763425	7.4669485	8.248341	7.9524803	7.8858085	8.974415	8.580719
"A_23_P13929"	6.871758	6.375291	6.6217327	6.595044	6.677816	6.454316	6.2669525	6.5489054	6.621976	6.503533
"A_23_P139295"	10.537358	11.024074	10.9697	10.918377	10.754636	10.401342	10.378217	10.594521	9.933856	10.379105
"A_23_P139297"	10.829792	11.290485	11.162356	11.14212	10.875976	10.578116	10.612816	10.937847	10.205749	10.711048
"A_23_P139312"	6.5104604	7.481151	7.0427146	7.1834846	7.2219696	7.002435	6.9459596	6.459939	7.201722	6.7201557
"A_23_P139327"	2.3140197	2.5294347	1.6868892	1.677667	1.7075859	1.7423719	1.6327319	1.6934708	2.0063317	1.7108111
"A_23_P139339"	9.587568	9.8959255	10.431891	10.156877	10.092712	10.534933	10.069393	10.263362	9.814903	9.722618
"A_23_P13934"	5.2308	5.507924	5.5180783	4.900733	5.2444663	5.798418	4.964532	5.226733	5.9631205	5.5297794
"A_23_P139376"	15.631188	15.491759	15.728631	15.726398	15.404473	15.369986	15.047883	15.423744	15.287452	15.384829
"A_23_P139388"	10.392573	9.841088	10.286103	10.149887	9.806439	9.664421	10.111079	9.606133	9.373383	9.7899
"A_23_P139396"	12.400292	12.638434	12.64263	12.575871	12.646656	12.701198	12.861949	12.345701	11.851899	12.451786
"A_23_P139408"	12.83404	12.456241	12.70962	12.484473	12.473795	12.40909	12.573769	12.612455	12.950254	12.684437
"A_23_P139418"	9.410699	9.58663	10.035925	9.911539	9.630835	8.548473	10.955172	9.323042	9.526219	9.621441
"A_23_P139434"	1.6899741	1.5702201	2.915269	3.2864554	1.6001257	3.1901915	1.6389494	1.5952525	1.576068	1.6165049
"A_23_P139455"	9.50765	8.678506	9.095085	8.765975	9.028667	8.958278	8.479855	9.235371	9.202847	8.850262
"A_23_P13946"	4.8953953	4.213528	4.564789	4.4189515	5.093782	4.33424	4.4444065	4.57277	4.5739746	4.641336
"A_23_P139471"	5.209128	5.719465	4.8626184	5.6130943	5.327426	5.2934756	5.74253	5.0290103	4.9170437	5.305402
"A_23_P139476"	15.314977	16.037207	15.404473	15.749599	15.532858	15.229419	15.3941	15.67423	15.820111	15.739101
"A_23_P139486"	12.821693	12.717188	12.950254	13.365493	12.644062	12.329867	12.969524	13.43706	13.168724	13.233901
"A_23_P139500"	12.185048	13.188617	12.885945	12.579373	12.167809	10.923623	12.511294	11.544117	11.352897	11.112332
"A_23_P139509"	10.506408	10.432606	10.572042	10.442434	10.562917	10.685365	10.911131	10.849458	10.702571	11.1310005
"A_23_P139527"	3.9911797	4.638988	4.1731806	5.2357273	4.504071	4.081477	3.4464116	3.562405	3.9073722	3.269537
"A_23_P139547"	12.888418	12.893122	12.927108	12.70552	11.944153	12.102838	12.223545	11.766449	11.825277	12.013908
"A_23_P139558"	9.8712	9.746907	9.917022	9.918451	9.7826185	9.974689	10.02088	10.601313	10.578116	10.399014
"A_23_P139575"	14.349058	14.871536	14.553296	14.557768	13.964343	14.05977	14.041291	13.907283	13.8971405	13.760448
"A_23_P139585"	6.221871	6.6664424	5.6972494	6.6152515	7.136508	5.8912997	6.472298	5.924947	5.632509	5.3224216
"A_23_P139600"	6.098056	7.3826084	7.695031	8.080621	5.1297193	10.202048	7.356877	8.415013	9.093856	9.703825
"A_23_P139632"	6.435211	6.423787	6.334792	6.324731	5.9920554	6.493698	6.63388	6.4193993	6.7307067	6.5471153
"A_23_P139635"	3.2201421	1.7102767	1.8079566	2.6794388	2.0511017	1.8802786	1.8287761	2.6058981	2.5150309	1.8182575
"A_23_P139648"	6.6992636	7.455645	7.025026	7.1079803	6.9368453	7.048605	7.038714	7.1346273	8.010255	7.2925634
"A_23_P139654"	2.6649597	1.8532757	3.3949926	3.4311888	3.9865859	3.3448308	4.7419643	3.0106945	2.8190987	2.818077
"A_23_P139669"	3.508389	3.7217288	3.6690538	3.3314688	4.711142	5.5813313	4.706852	5.10162	4.009948	5.442203
"A_23_P139682"	5.0049534	4.3147197	3.934382	4.5078006	4.97726	3.4958396	3.5049248	5.0288353	4.327936	4.3480253
"A_23_P139687"	7.173275	4.4731197	6.3448663	4.8647923	5.4416757	3.4429967	4.7662535	6.0409584	4.8953953	6.3372846
"A_23_P13969"	15.836996	15.679658	15.736485	15.471061	15.663552	15.4118595	15.246796	15.863446	15.892772	15.793906
"A_23_P139704"	11.126131	10.436044	10.159748	9.701429	10.774487	8.507553	10.010771	11.7343235	11.61699	11.011536
"A_23_P139722"	8.537643	7.5231533	8.201417	7.198497	7.9400864	5.553861	6.3352146	8.670521	8.562209	8.415512
"A_23_P139725"	1.4972538	1.4916168	1.5045334	1.5168389	1.4985248	1.5050044	1.5061532	1.4966996	1.4980145	1.4936643
"A_23_P139740"	4.422869	6.9504137	7.4491053	7.067531	6.401415	7.628317	4.6706457	2.9513218	2.5636163	2.0041325
"A_23_P13978"	8.289712	9.526964	8.66108	9.219203	8.144522	8.556686	8.690459	8.21772	8.01527	7.840109
"A_23_P139786"	6.193937	4.3933268	4.8547006	4.3741703	6.701285	4.1955857	5.9978747	5.4825106	5.6507425	4.771223
"A_23_P139795"	6.427881	6.627809	6.054569	6.372614	6.3612804	6.499218	6.6394367	6.9016285	6.71085	6.732175
"A_23_P139820"	8.763652	9.334825	9.572008	9.456806	9.268915	9.355572	9.136935	8.97067	9.459716	9.378154
"A_23_P139825"	7.426096	7.6190825	7.476858	7.79134	8.551429	9.365383	9.3776245	8.249832	7.458502	8.212247
"A_23_P139841"	5.9920554	6.965137	7.9437017	6.7903934	4.484625	5.6789894	3.7487261	7.4861236	8.499054	6.380342
"A_23_P139864"	1.6538973	2.062932	2.6274073	1.6492875	1.6473634	1.6677482	1.6324241	3.7166095	1.9578366	3.133409
"A_23_P139881"	8.000635	9.179152	8.267047	8.538266	8.694756	9.286308	9.047636	8.0772295	7.6229134	7.811859
"A_23_P139891"	11.404555	11.097155	12.00645	8.747802	9.864898	10.170249	10.077449	8.812558	9.048381	9.411848
"A_23_P139895"	7.7548447	8.152568	7.975114	8.4301605	7.8773904	7.8565397	8.120891	8.086269	8.405678	8.241124
"A_23_P139912"	10.159456	9.202976	10.000065	8.413436	9.621646	7.2334914	7.645071	12.500191	12.287726	11.761017
"A_23_P139919"	8.862419	9.417078	8.704502	8.172336	7.8380985	8.3097725	8.591585	7.467621	7.6898365	7.2295327
"A_23_P139929"	12.263684	13.381145	12.911657	13.414433	12.940203	13.144982	13.187642	12.523419	12.587076	12.805377
"A_23_P139950"	7.6175528	8.020072	7.687842	7.4669485	7.6898365	8.0386505	8.1365185	7.7713885	8.030677	7.7886024
"A_23_P139958"	8.472901	8.281927	8.24558	8.480499	8.054284	7.928505	8.49921	7.328301	7.1208954	7.729266
"A_23_P139965"	12.507003	12.260624	12.444714	11.67864	11.437122	11.368515	11.764732	11.780436	12.089255	11.699082
"A_23_P13998"	10.403871	10.640134	10.040646	10.702227	9.896337	10.147018	9.711357	10.735181	10.913648	10.5800705
"A_23_P139983"	7.2214904	7.3242946	7.501239	7.485317	7.3379993	7.698834	7.4802856	6.7460356	7.0935864	7.257749
"A_23_P139986"	2.8705232	4.006574	1.947075	3.6153843	3.9310348	2.5266786	3.0967247	2.762122	2.8507106	4.033078
"A_23_P139998"	8.849842	8.980619	9.016835	8.915502	9.105591	9.167934	9.137126	8.920952	8.316489	8.8315
"A_23_P140009"	4.792024	5.069044	4.9528565	4.9872932	4.6896415	4.467353	4.3713427	4.424658	4.0878735	5.1970186
"A_23_P140029"	10.254432	10.568822	10.916518	10.378217	9.926833	10.204417	10.042495	10.635002	10.672418	10.444955
"A_23_P140035"	9.595812	9.534028	9.530754	9.990556	9.607468	10.078107	10.270361	9.870409	9.773882	9.780146
"A_23_P140050"	8.265939	8.381782	8.418556	8.250103	8.487219	8.648737	8.436735	7.9570355	8.6178055	8.26541
"A_23_P140057"	3.6362033	2.500384	2.5028133	1.5553324	3.7566729	1.6818278	1.9269817	4.681768	4.6283097	4.048754
"A_23_P140069"	10.256851	10.094376	10.276436	10.53244	10.413295	10.426667	10.177728	10.185539	9.681299	9.871388
"A_23_P140074"	3.2817638	3.4478617	2.6642532	3.3381004	3.1416664	3.5918987	2.4503193	4.8491483	4.932192	6.143141
"A_23_P140088"	8.7589655	9.205781	8.962706	9.017198	8.556508	8.366402	8.370419	8.841753	8.99615	8.667979
"A_23_P140111"	10.654603	10.290219	10.465863	10.312045	10.410581	10.481832	10.9705515	10.1734295	10.339191	10.285231
"A_23_P140115"	11.912843	12.205286	12.219335	11.819438	11.932564	12.293597	12.367002	12.280042	13.233901	12.679866
"A_23_P140146"	13.729331	13.213135	13.716489	13.665347	13.0233	13.616066	13.944927	13.404712	13.867918	13.121878
"A_23_P140154"	9.207943	8.771754	9.2460575	9.047923	8.459826	8.709625	8.631118	8.905789	8.570329	8.899776
"A_23_P140170"	9.784119	10.016991	10.075532	10.335503	10.013046	9.846431	9.617548	10.433282	9.774221	10.209502
"A_23_P14019"	1.7572122	1.7274096	1.901345	1.9245827	1.7723932	1.8410242	1.8197274	1.872486	2.0106509	1.8913494
"A_23_P140190"	1.9606764	1.7029794	1.7781563	1.8944763	5.497605	2.6038384	5.0538263	2.326655	2.3954089	1.8008324
"A_23_P140207"	11.056782	11.300974	10.879545	10.2855425	13.028371	12.236392	12.266114	11.144887	11.132859	10.616981
"A_23_P140241"	8.172336	8.519392	8.45818	8.388426	8.162216	8.557827	8.098698	8.074586	7.9847713	8.244101
"A_23_P140256"	11.238915	11.086022	11.114715	11.239339	11.868883	10.122512	10.600004	11.570675	12.113878	12.358442
"A_23_P14026"	9.437127	9.289797	9.434467	9.395742	9.625656	9.637224	9.568654	9.867585	9.75615	9.926222
"A_23_P140277"	10.181049	10.0751915	9.516689	10.587863	11.074194	10.99286	11.545087	10.620539	9.674221	10.4744625
"A_23_P140290"	12.351561	11.594983	12.743914	11.354867	12.087226	13.030534	13.048567	11.807605	11.300974	11.880458
"A_23_P1403"	4.9124446	5.533377	5.007746	5.1722746	5.0761256	5.4164762	5.4633164	5.8867726	6.2026343	5.627774
"A_23_P140301"	12.665524	13.270686	12.949629	12.958481	12.792938	12.56557	13.147125	12.738719	12.5938015	12.676807
"A_23_P140309"	12.749123	12.8662195	12.712102	12.993395	12.85892	12.691548	12.795228	12.962236	13.183987	13.0121975
"A_23_P140316"	4.4785976	7.7768216	6.5802965	8.227628	5.195831	5.961296	5.4603634	4.733672	4.2966976	5.698853
"A_23_P140328"	11.400648	11.570675	11.7275	11.714331	11.482874	11.631708	11.468796	11.526805	11.311656	11.34801
"A_23_P140342"	1.6075654	1.5961165	1.650793	1.6361517	1.632818	1.6913637	1.8549548	1.6748288	1.6245048	1.6871887
"A_23_P140347"	4.249139	3.7748647	3.8045726	2.445928	4.774229	4.6168456	4.2534065	5.6692886	4.918133	4.710598
"A_23_P14035"	2.4040258	1.6679457	3.145557	1.9143559	3.671187	1.7877235	1.7983925	4.752635	3.1094716	2.8073685
"A_23_P140362"	1.5117139	1.5065897	1.5335445	1.5643412	1.5139712	1.5281149	1.831051	1.5057796	1.5064428	1.5149671
"A_23_P140373"	4.5992312	3.2156284	4.3854065	2.8390203	3.7655315	3.1719785	2.9960203	3.3274755	2.3775828	3.8532908
"A_23_P140375"	4.796814	5.2373614	4.6008625	4.1710067	3.7071116	4.1810665	2.9472213	6.3778563	7.173804	7.8811054
"A_23_P140384"	9.395316	6.5899925	8.526913	6.3498354	11.025829	4.7579594	6.4666395	7.9667263	6.3327436	7.6660795
"A_23_P140394"	7.5840406	8.109932	7.668146	7.7273726	7.8241234	7.616049	7.9784913	7.737388	8.31428	7.4135065
"A_23_P140405"	12.251604	11.483298	12.056396	11.6235285	12.255772	11.658358	11.810404	12.233458	12.521321	12.5106535
"A_23_P140423"	13.645508	13.949157	13.918648	13.765385	13.816915	13.8335285	14.202535	13.920007	14.271853	14.013799
"A_23_P140427"	13.644648	13.682444	13.5660305	13.147125	12.577556	12.435743	12.70552	12.972803	13.4234295	12.930627
"A_23_P140434"	10.467911	9.564679	10.059979	10.158911	7.8817325	7.3958035	6.5424128	9.972202	10.102516	9.997424
"A_23_P140450"	9.36138	10.340215	8.595158	10.030196	6.253163	5.8884215	5.4164762	10.4023075	10.216582	11.068772
"A_23_P140454"	3.869183	4.2072153	4.3249884	4.4659023	4.6702857	3.9395018	4.2465024	5.0131636	5.225559	3.9460669
"A_23_P140469"	8.345661	8.543417	8.3536005	8.437657	8.175651	8.46746	8.551794	8.526446	8.903977	8.845821
"A_23_P140475"	1.8761883	1.5177296	5.507924	4.197152	1.5125518	1.5278363	1.5466461	3.9080195	2.34604	1.856727
"A_23_P140490"	10.667276	11.314003	11.410443	11.676791	10.791069	11.519729	10.435093	11.905998	11.764254	11.555774
"A_23_P140511"	9.562793	9.49638	9.618661	9.526219	9.180785	9.086473	9.378969	9.642166	9.961861	9.609092
"A_23_P140515"	12.350455	12.068687	12.478669	12.103631	11.774964	12.145033	12.119986	12.564826	12.637215	12.384836
"A_23_P140527"	9.162682	9.203495	8.994558	8.955674	8.609694	8.869598	8.762613	10.201237	9.7531395	9.908856
"A_23_P140562"	9.173494	9.45483	9.288903	9.731944	8.864095	8.997266	8.525083	8.307911	8.190918	8.010554
"A_23_P140563"	7.945571	8.650087	7.9556823	8.857878	7.4919605	7.978297	7.1350985	6.8281198	7.007779	7.155819
"A_23_P140591"	7.943539	8.287081	7.285476	7.407733	7.840109	8.893378	8.779867	7.7157173	8.184227	8.06373
"A_23_P140602"	11.24754	11.34801	11.493869	11.352031	10.821291	11.107498	11.322783	11.198149	11.382916	11.49583
"A_23_P140614"	8.317325	8.603339	8.062068	8.177472	7.7178	7.1479683	7.7710896	6.7768984	8.274955	7.273214
"A_23_P14062"	10.558525	10.322211	10.278686	10.564727	10.682335	10.602722	10.819806	10.29061	10.186431	10.154527
"A_23_P140630"	6.258593	6.7768984	6.5730104	6.486043	6.050198	6.632891	6.490596	6.516285	6.7580147	6.509688
"A_23_P140648"	10.962195	10.391666	9.95676	9.962155	11.038482	9.548994	9.993951	10.241048	9.519764	10.044977
"A_23_P140654"	5.293714	8.234093	5.129971	4.2494965	8.2880945	7.9471993	7.6115565	5.4457893	5.328031	5.2300334
"A_23_P140668"	11.31575	11.277597	11.151646	11.5171	11.094757	10.848292	10.7168255	10.338999	10.2849865	10.361716
"A_23_P140675"	5.3259244	4.9018555	4.735857	5.629687	5.3132424	4.7909236	6.5228863	4.556237	4.721227	4.8560247
"A_23_P140698"	8.353421	8.022689	8.3750305	8.085691	7.9667263	8.091242	7.904224	7.696651	7.8560705	7.732344
"A_23_P140705"	9.092952	9.516927	10.025303	9.439902	8.676993	9.784119	9.703917	8.796786	8.560878	8.820106
"A_23_P140716"	2.1195254	1.9072896	2.1881847	1.5290504	2.2356117	1.5110636	1.5143491	1.6506947	2.1526258	1.4994075
"A_23_P14072"	10.872197	10.0529995	10.288889	9.870409	12.035689	13.515636	13.713371	11.286972	12.0246	12.224383
"A_23_P140725"	10.128432	9.808888	10.13771	9.847692	9.455895	9.84175	9.803256	9.334094	9.75537	9.407909
"A_23_P140738"	6.5685935	5.766285	6.8394036	5.595349	7.2932477	5.377717	6.03201	6.4711437	5.44802	6.843919
"A_23_P140748"	13.25542	14.969314	14.166723	14.018708	14.139336	15.004903	15.215186	14.486823	14.041291	13.99132
"A_23_P140760"	4.5808516	4.6018524	4.4687915	4.729122	5.576906	4.7568517	5.2925634	3.9684696	4.4718304	4.0223293
"A_23_P140780"	2.8249505	1.6020001	1.5118539	3.8888586	1.5181439	3.2829437	1.5054853	1.5234098	1.5079314	1.5274823
"A_23_P140792"	2.158705	2.8910546	1.5445688	1.5337193	2.2786198	2.2427135	3.3267243	3.109694	3.6716168	2.8205354
"A_23_P140797"	8.643218	8.77118	9.144484	6.4624715	3.4572315	2.1047826	1.8001941	4.531696	3.8532908	5.1661634
"A_23_P140807"	12.120587	12.687404	12.266114	12.320364	12.332715	11.730155	12.099611	12.567626	13.015523	12.644062
"A_23_P140821"	9.231148	9.262054	9.547659	9.23186	9.61173	9.760895	10.004062	9.522358	9.372965	9.6397
"A_23_P14083"	13.11326	11.611566	12.8463955	9.0920925	9.239777	6.32216	5.48111	9.137816	8.8369875	9.188002
"A_23_P140830"	9.203624	10.261222	9.429022	9.458279	8.777991	9.287054	9.207565	9.686069	9.650451	9.663001
"A_23_P140848"	8.4925995	8.634321	8.905389	8.613167	8.58219	8.410454	8.386003	7.982486	7.880045	8.099356
"A_23_P140858"	1.9125562	3.369691	2.7759452	3.5541153	12.251604	2.7477083	3.2269855	8.273688	9.507059	7.0490875
"A_23_P140876"	11.610269	11.428342	11.593369	11.226383	11.088279	11.4514265	11.607041	10.195929	10.182378	10.409088
"A_23_P140884"	9.5729	7.431854	9.640371	8.424969	9.194107	9.814409	6.6679807	10.145449	9.932625	10.397115
"A_23_P140907"	10.286324	9.568761	9.928269	9.771859	10.019406	9.938805	11.250778	8.686094	8.748222	9.202039
"A_23_P140916"	12.209568	11.99543	12.115125	12.22301	11.722524	11.907374	12.262061	11.875608	11.763179	12.098673
"A_23_P140928"	3.9953706	4.6824713	4.2806077	4.6728106	3.464479	1.5449466	2.5985615	3.769382	3.3518996	3.895572
"A_23_P140960"	13.629728	14.039762	13.8934	13.67539	13.932357	14.045896	14.190746	13.262949	13.041394	13.381145
"A_23_P140967"	7.097291	7.8618417	7.0164223	7.432687	6.916746	7.103694	7.4092145	7.3120065	8.823232	8.62499
"A_23_P140978"	7.285266	7.376538	7.563339	7.2663293	6.987319	7.635718	7.3265347	7.038105	6.649806	7.179919
"A_23_P140994"	8.392007	8.563145	8.386518	8.154407	8.811138	9.053227	9.276513	8.244571	8.451854	8.301723
"A_23_P141005"	8.864727	10.036913	9.603661	9.645757	9.868267	9.712038	9.088378	8.336573	9.534531	8.35632
"A_23_P141021"	4.2131143	4.3178678	3.7834568	4.441535	5.6510773	4.900733	4.3196287	4.714581	4.0001593	5.101095
"A_23_P141029"	14.834742	14.91647	15.08312	14.613234	14.704575	14.775405	14.899723	14.505264	14.495842	14.448456
"A_23_P141032"	14.181196	14.331979	14.532418	14.055807	14.009541	14.258351	14.289549	13.870164	13.640942	13.848994
"A_23_P141035"	8.847076	9.401783	8.857878	9.68377	7.967557	8.447965	8.58609	6.605435	7.321489	7.1973205
"A_23_P141044"	11.12652	10.896123	11.0357065	10.955172	11.08318	11.429045	11.680048	11.172099	11.305744	10.925312
"A_23_P14105"	10.179018	10.453177	10.109757	10.729176	11.048171	11.138244	10.486791	10.591681	10.425922	10.44227
"A_23_P141055"	7.418753	5.615284	6.7340155	6.646503	7.706841	5.556793	6.4759703	6.6146474	6.347678	6.146197
"A_23_P141076"	1.5832808	2.2715209	1.5682456	3.891721	5.0671897	5.587879	3.9230676	6.1839285	1.8274157	2.7135944
"A_23_P141092"	2.0284255	1.7216222	1.8021549	1.8858764	1.7722439	1.8327742	1.806603	1.8711283	2.6136417	3.2169964
"A_23_P141100"	8.670722	8.963454	8.811138	8.716731	8.347856	8.4613905	9.257925	8.338529	7.3946424	8.262935
"A_23_P141126"	7.5825486	7.1160293	7.374661	6.6701317	7.101964	7.1204033	7.366774	7.394177	7.72228	7.3625083
"A_23_P141142"	3.239994	3.147719	2.4889255	2.8190987	2.7443755	3.882685	2.4540668	2.215227	2.950128	2.321425
"A_23_P141146"	7.1488895	7.5226035	7.5916204	7.361101	6.459422	7.3334336	7.2162538	7.222916	7.0035586	6.801948
"A_23_P141163"	5.2223907	5.2462673	5.127396	5.1890926	5.227284	5.8796067	5.971808	4.6853766	5.281297	5.1179223
"A_23_P141173"	2.1400511	1.9463646	1.8964266	2.230429	2.3954089	2.0532923	2.547343	6.8645988	4.963598	4.788253
"A_23_P141180"	12.972803	13.049969	12.635151	12.861116	12.726636	12.621769	13.047579	12.393223	12.633716	12.38209
"A_23_P141191"	4.007236	2.0549028	2.7380881	1.583879	4.793122	8.560878	7.0257926	6.9761834	5.805761	6.9309936
"A_23_P141194"	11.77775	11.892207	11.601948	11.8699665	12.11345	11.79311	11.964087	11.667539	11.897976	11.812269
"A_23_P141208"	9.422495	9.287743	9.150587	9.667772	9.20679	9.224488	9.093104	9.338187	9.441785	9.516351
"A_23_P14124"	6.005809	4.2773666	5.093782	4.811967	6.0602627	6.7988057	6.258593	6.1626077	6.781914	6.2169027
"A_23_P141248"	7.209595	8.026416	7.371405	7.1730757	7.8590994	7.521405	8.278206	6.351349	6.9551306	7.0621862
"A_23_P141302"	10.243649	10.350361	9.790328	10.222174	9.610713	10.035228	10.349902	9.762093	10.014268	9.673739
"A_23_P141306"	1.7753453	2.326655	1.9476113	2.3108628	1.8433623	2.1370206	2.033949	1.9839131	1.809529	1.9734619
"A_23_P141315"	8.49622	8.358875	8.409856	8.884647	8.145881	7.9153194	7.4470453	9.188692	9.375498	8.385071
"A_23_P14132"	10.161642	10.73727	10.844384	10.948065	10.773291	10.584768	11.20134	10.991281	11.366568	10.8857155
"A_23_P141329"	9.763425	9.551718	9.560674	9.602289	9.915024	9.936404	9.268201	9.632082	9.579272	9.747357
"A_23_P141335"	5.680872	5.4994974	4.8050857	5.4877048	6.3538084	6.430017	6.1412964	5.8643723	5.213332	5.587107
"A_23_P141342"	5.024448	4.8886395	4.4044952	4.765972	5.8241425	5.849256	5.4404736	4.691069	4.7684627	4.641172
"A_23_P141345"	9.485384	9.350311	10.289211	9.837168	9.378969	9.765482	9.425817	8.483781	9.182249	9.15335
"A_23_P141346"	8.971415	8.864095	9.744523	9.274109	8.861737	9.260988	8.878934	7.813391	8.587042	8.627768
"A_23_P141362"	7.070018	6.019853	6.1222143	6.1050982	8.454417	6.3992996	6.811251	8.101344	7.7200193	7.146338
"A_23_P141367"	8.278581	9.742314	10.697155	7.1715527	6.9757586	9.556255	6.375066	9.33754	9.054611	8.794377
"A_23_P141376"	7.0501447	5.7352486	6.245162	5.742262	7.163015	5.59982	6.008982	6.66901	6.0283294	6.039302
"A_23_P141389"	15.266853	15.342531	15.317232	15.456683	15.482924	15.379318	15.287452	15.542101	15.496091	15.549844
"A_23_P141394"	9.3448	9.696687	9.347361	10.228858	10.144026	10.353565	10.5556135	11.394697	11.27129	11.55038
"A_23_P141405"	14.737264	14.877523	15.666633	15.166406	14.149793	13.726617	13.817905	14.869809	14.869809	14.973765
"A_23_P141415"	7.6700125	7.287906	8.211479	7.0859466	7.738886	7.85095	8.212402	7.7137656	8.020072	7.0123286
"A_23_P141429"	7.832455	7.579889	6.9235363	6.7744	8.5756	7.5017066	7.735306	7.135318	6.8267426	6.6123023
"A_23_P141434"	6.0243344	7.7239313	7.223467	7.0057654	6.8808618	7.3124266	7.8914804	5.590154	6.0791826	5.9798117
"A_23_P141447"	6.3654118	7.7960386	7.6532526	7.6078663	6.499218	6.6974854	6.615531	6.3983383	7.0111346	6.3644
"A_23_P141459"	4.7288218	4.9875617	4.632984	4.624194	4.7137547	5.2527447	5.0717797	4.2412887	4.5620627	4.4305277
"A_23_P141467"	5.4336243	6.8547077	5.549294	5.9414787	5.316156	7.1461453	6.925179	4.8545127	5.199064	4.8301167
"A_23_P141479"	10.749906	10.888505	10.838645	10.853292	12.073616	12.452433	11.742102	10.961626	10.891326	10.753842
"A_23_P141484"	10.633364	10.543679	10.627947	10.655257	11.176408	11.50481	11.806789	10.858021	11.073328	11.047035
"A_23_P141505"	7.226871	6.8829885	6.7415137	6.1301837	8.570329	6.28294	7.467621	7.117568	8.247499	6.991967
"A_23_P141508"	4.95582	5.1284995	4.7760143	4.6291213	5.532169	4.614665	5.182444	4.6952095	5.063593	5.035702
"A_23_P141520"	11.335673	11.719833	11.710953	11.581641	11.471649	11.189663	11.590705	11.395583	11.148223	11.312627
"A_23_P141549"	16.445086	16.316025	16.562864	16.562864	16.324287	16.331244	16.18464	16.413492	16.38469	16.361923
"A_23_P141555"	3.4464116	1.9436972	2.297358	1.8587123	3.9663608	1.8411229	5.244194	2.7806277	3.628891	3.9802184
"A_23_P14157"	8.878238	8.885474	9.015769	8.774931	9.133668	8.559642	7.153626	9.437127	9.021281	8.477273
"A_23_P141600"	4.3795094	3.6661453	4.7491364	3.5045128	4.3445864	4.1016464	3.9128046	3.3277724	4.3993235	4.3298116
"A_23_P141606"	11.104284	11.053501	11.005868	10.850454	11.298381	11.235968	11.185051	11.110719	11.35445	11.119122
"A_23_P141624"	1.6444882	1.8424829	1.7101461	1.7652128	2.1235	1.7318763	3.3348699	3.0110192	1.6550778	1.7896093
"A_23_P141636"	12.810563	12.644621	12.824283	12.602816	12.635151	13.262949	12.895763	12.7617035	12.574959	12.896685
"A_23_P14165"	3.5256631	2.6656466	2.3841329	2.7088482	4.4785976	2.4994626	5.053155	3.0045033	3.0724294	2.8157685
"A_23_P141651"	8.223268	8.542061	8.72754	8.379144	8.471832	8.569754	8.503366	8.355121	8.198729	8.519891
"A_23_P141656"	10.765602	10.814617	10.70316	10.812127	10.8343315	10.776254	11.133685	10.682335	10.944006	10.418965
"A_23_P141665"	1.7404242	1.7021096	1.7752111	1.8335829	1.7428995	3.744823	1.7739338	1.8410242	1.7295223	1.8439338
"A_23_P141680"	6.637441	6.4759703	6.1307716	6.1262364	7.393959	7.086884	6.553123	6.4951005	6.4467087	6.438427
"A_23_P141688"	10.095053	8.299444	8.880482	8.555861	10.718088	9.789103	10.11643	9.799709	9.6560755	10.559043
"A_23_P141699"	14.268632	14.350982	14.103687	14.118769	14.382851	14.299107	14.71408	14.51884	14.542992	14.393365
"A_23_P141706"	2.0312119	1.8441883	2.0945194	2.5242202	2.491836	2.412822	2.1701863	2.0947142	1.8666208	2.0597336
"A_23_P141715"	11.316378	11.608759	11.588658	11.684883	10.587863	10.667896	10.279132	10.348888	10.001872	10.533541
"A_23_P141717"	10.507098	10.949468	10.799971	10.897809	9.912892	9.988327	9.579858	9.423622	9.06522	9.629557
"A_23_P141730"	4.2984276	2.2540767	3.5297241	3.2873187	2.608489	4.7929325	3.0296688	5.2131395	5.353123	5.969873
"A_23_P141738"	9.69558	9.811752	9.58072	9.998035	10.075532	9.536321	9.711907	10.012201	9.524251	9.825893
"A_23_P14174"	7.803064	7.1496325	7.3147125	6.916746	8.589759	7.311728	7.9847713	6.986576	6.7465744	6.1078653
"A_23_P141764"	7.0270667	7.5393934	7.0769176	7.0295024	7.063407	7.397366	8.107088	7.500647	7.761043	7.3285594
"A_23_P141770"	11.216145	10.921758	10.831957	11.015246	10.53652	10.676608	11.536716	11.713291	12.473795	11.310176
"A_23_P141779"	9.778517	9.868027	9.508934	9.631496	9.787843	9.796477	9.742902	9.264915	9.225782	9.246637
"A_23_P141785"	5.2139077	5.656765	5.24348	5.1934013	5.0708137	5.5511518	4.862981	5.64833	5.622605	5.5073905
"A_23_P141802"	2.50214	3.0567565	2.231078	1.561659	3.0110192	2.650004	2.0298219	2.2316349	2.8059452	2.2702441
"A_23_P14184"	10.64297	10.022673	10.635505	10.474679	10.558701	10.105065	10.237448	10.591988	10.672687	10.593262
"A_23_P141847"	10.27173	10.452735	10.290219	10.272451	10.320344	10.677451	10.701625	10.080414	10.050125	10.193161
"A_23_P141856"	11.165218	10.948768	11.321852	10.959404	11.045931	11.104507	10.933948	10.713301	10.940677	10.7705
"A_23_P141863"	9.19699	8.936439	9.133819	8.867119	8.911519	9.047506	8.896264	8.161058	8.359085	8.789066
"A_23_P141866"	8.960419	9.190693	9.015086	8.596774	8.98163	9.332424	8.522013	7.9845896	7.686469	7.9014807
"A_23_P141893"	10.300159	8.512624	9.428094	9.665683	7.73216	8.443734	8.283984	8.277739	8.859266	8.3750305
"A_23_P141894"	6.1704993	6.066547	5.667756	5.5153894	5.3030443	5.9614344	6.2034287	5.477904	5.21528	5.9473095
"A_23_P141917"	7.908437	7.904457	7.6475735	7.5846353	8.3672495	8.528173	8.719829	7.418753	6.754829	7.444845
"A_23_P14193"	6.989007	7.4310813	6.7074757	6.9800935	6.745574	7.0814238	7.0100765	6.0786614	5.4472117	5.978826
"A_23_P141939"	1.8542453	1.8781061	2.1216898	2.5729368	2.040676	2.4601846	2.1431892	2.145043	1.9120013	2.190101
"A_23_P141946"	11.648993	10.126031	11.186192	10.141412	10.118287	8.993668	9.468885	12.141692	11.589998	10.900664
"A_23_P141960"	7.2043343	6.878285	7.376125	7.238454	7.669534	7.116842	7.091287	7.448235	7.429777	7.6557956
"A_23_P141965"	9.490172	9.504109	9.360363	9.289489	9.496922	9.220619	9.836415	9.281987	9.391548	9.171771
"A_23_P141974"	10.149302	9.792943	10.197609	9.886183	10.550442	7.5355825	8.840493	10.8804	10.312539	10.264853
"A_23_P141992"	10.363651	10.52743	11.111601	10.562917	10.179698	10.570888	10.127705	9.790103	10.473711	10.103113
"A_23_P142013"	7.0749702	7.2624936	7.039746	6.6364613	6.869174	6.8822703	6.9481487	6.34453	6.891552	6.417047
"A_23_P142018"	12.36074	12.396717	12.473795	12.25223	12.614893	12.715895	12.740572	12.079496	12.197489	11.89121
"A_23_P142022"	9.407112	9.382129	9.507933	9.199086	9.589385	9.769978	9.756433	8.926174	8.892641	8.805638
"A_23_P142031"	6.775542	7.011359	6.608607	6.908036	6.580772	7.1143627	6.920853	6.8716063	7.0715876	7.0450993
"A_23_P142037"	7.228932	5.349988	6.1544256	5.24348	4.35581	4.787801	4.3257275	4.889603	6.023872	5.7343173
"A_23_P142045"	14.034083	14.726822	14.372457	14.202535	14.302172	14.613234	14.481879	13.848029	13.665347	14.186003
"A_23_P142055"	6.7310266	7.020762	6.6236444	6.702161	7.7021275	7.315707	7.5740137	6.8421936	7.2516127	6.546901
"A_23_P142070"	3.2374842	3.2098362	3.6247702	1.7111961	4.191714	1.9541858	4.7468257	3.5899477	2.7535286	1.7194104
"A_23_P142075"	12.323131	7.586336	7.509783	8.450202	11.019314	6.865038	10.852836	8.971118	9.646368	8.482661
"A_23_P142096"	3.7194736	2.3722632	2.1190224	1.6057248	2.1159308	2.3668053	2.1967177	2.9610705	3.9507108	4.01659
"A_23_P142125"	8.673924	6.9459596	7.8414145	7.469816	8.191576	6.90202	7.41439	7.660424	7.3590603	6.1995068
"A_23_P142146"	15.423744	15.2265005	15.482924	15.353789	15.27063	15.334973	15.035091	15.609731	15.606669	15.588872
"A_23_P142154"	9.853751	9.846431	10.127088	9.683957	9.848066	9.864424	9.794016	9.629063	9.8509245	9.594315
"A_23_P14216"	3.7141979	4.394969	4.7784185	4.919805	4.787801	5.314228	5.348514	4.133629	5.2131395	4.8385925
"A_23_P142173"	5.127396	5.6048727	5.481896	5.3525496	5.2620454	5.702075	5.2761364	5.0014462	5.5840273	5.0797024
"A_23_P142174"	4.9444184	4.898947	5.1703324	4.8063974	5.6550665	5.1853895	5.3753557	4.7003765	5.248182	4.526713
"A_23_P142187"	6.8490086	6.6812315	6.6168966	6.3918247	8.294718	10.065432	8.664636	8.211336	7.4959874	7.651284
"A_23_P142197"	7.1369853	7.405981	7.2885456	7.3032084	7.0257926	7.3840013	7.42437	9.262054	8.3454685	8.579046
"A_23_P142201"	2.663588	3.3395925	2.5784218	1.5866185	2.5718093	2.8663015	2.622814	1.5892801	4.624859	2.0397596
"A_23_P142205"	5.100099	3.148879	2.6451936	1.6017509	5.062943	1.5856736	4.9296217	1.5918547	1.5729761	1.5674863
"A_23_P142239"	5.081754	2.3323877	5.1379924	4.824502	3.6276639	4.6129	4.716661	5.754292	4.908625	6.210754
"A_23_P142250"	5.7540293	4.5616574	5.8599963	5.491362	4.678726	5.7379985	4.791763	4.9146185	4.9104977	5.2387066
"A_23_P142255"	9.072248	10.571111	9.716125	7.1241226	7.1943593	8.65246	8.124264	7.185757	8.801595	8.773409
"A_23_P142272"	9.8728285	10.252184	10.019406	10.000305	10.141412	10.224531	10.333838	9.873022	9.714437	9.781395
"A_23_P142289"	10.185738	10.219837	10.223026	9.701686	9.977777	9.970287	10.230724	9.471042	9.394171	9.686996
"A_23_P142294"	8.217467	8.59264	8.093621	8.355845	8.655914	7.9377503	7.9859366	9.230789	9.15093	8.712621
"A_23_P142304"	7.8888474	7.3451777	7.65307	6.6575866	9.322174	8.657526	8.485686	8.451327	8.062613	8.317943
"A_23_P142310"	12.664449	12.210262	12.344269	11.882451	14.42846	13.86464	14.322008	13.035546	13.257541	12.977236
"A_23_P142322"	14.331979	14.077209	14.276819	13.594512	14.362701	14.253417	14.471744	13.7119875	13.236426	13.398158
"A_23_P142325"	7.9342866	8.2604885	7.862979	7.6990466	7.9936247	8.356099	8.759903	7.1527333	7.523321	7.516444
"A_23_P142333"	5.877225	5.8959503	5.8752875	5.656522	6.0243344	6.3515773	6.2317863	5.106303	5.240359	5.286269
"A_23_P142335"	4.858905	4.788453	4.638722	4.928271	4.6168456	4.7760143	4.7694526	4.4993978	4.1688414	4.284315
"A_23_P142345"	5.2019377	4.9025073	5.3206267	4.027701	4.9654865	5.3539634	5.1135874	4.6432567	5.103891	4.428569
"A_23_P142361"	7.57266	7.780106	7.4864254	7.586336	8.490984	7.8674207	7.9754705	7.7019734	7.790741	7.6515245
"A_23_P142380"	9.932625	9.9048815	10.004663	10.174962	10.150598	10.093248	10.745683	9.763134	9.6896305	9.574368
"A_23_P142389"	8.164773	9.119869	8.533153	8.875523	9.077478	9.363643	9.139044	9.129993	10.0089855	9.588079
"A_23_P142395"	7.950261	5.5236683	7.4662924	6.2004185	5.1097445	5.4256706	5.778092	5.4999323	5.818399	5.6712303
"A_23_P142403"	6.1081505	4.7666516	6.098578	5.2071133	4.9241624	6.9448724	4.9531302	5.492756	5.6378155	5.121777
"A_23_P142407"	7.975695	8.19573	7.7408633	7.8719506	8.300162	7.7347374	8.385347	8.039455	8.290986	8.021395
"A_23_P142421"	9.976642	9.886414	9.912731	9.960088	10.231452	10.323814	10.34776	9.642535	9.392123	9.36393
"A_23_P142424"	10.089018	9.554226	9.300074	9.359238	10.37059	10.301851	10.489807	9.454332	9.699007	9.452378
"A_23_P142447"	9.028935	8.559879	7.9145813	7.7593036	10.609607	8.698157	10.007114	8.394937	8.406975	7.833602
"A_23_P142455"	10.713547	11.552282	10.8805685	11.008089	10.528567	10.99446	10.773941	10.091323	10.164108	9.898111
"A_23_P142475"	16.827635	16.562864	17.448101	16.605404	16.909351	17.214016	17.021898	17.114296	17.077492	16.96771
[truncated: 4,139,185 more chars]
