# Supplementary material for: Corrigendum to “Identification of Differentially Expressed Genes in Pituitary Adenomas by Integrating Analysis of Microarray Data”
Source: Int J Endocrinol. 2018 Sep 6;2018:6069189. doi: 10.1155/2018/6069189 (PMC6146651; doi:10.1155/2018/6069189)
Supplement: Supplementary 2 — The normalized datasets by Z score transformation. [file 6069189.f2.xlsx]

## Sheet: 4237
id	GSM96620	GSM96621	GSM96622	GSM96623	GSM96624	GSM96625	GSM96626	GSM96627	GSM96628	GSM96629
1	0.433292	0.25287	0.050778	0.0346938	0.289381	0.368131	0.283581	-0.224365	0.0174633	-0.150597
2	0.19694	-0.250677	-0.395379	-0.2591	-0.232365	-0.0267014	0.116296	-0.527084	-0.0819857	-0.222747
9	0.0470378	-0.126986	-0.00978384	0.36855	0.29307	0.26135	0.24937	0.51262	0.433978	-0.641173
10	-1.14605	-0.950182	-0.871201	-0.641547	-0.62546	-0.884178	-0.78698	-2.03266	-1.53805	-0.725643
12	1.02705	0.243633	0.388417	1.56332	0.0954162	0.522001	1.97081	-1.56323	-1.28591	0.738364
13	-1.02823	-1.32338	-0.898786	-1.33926	-0.605365	-0.949253	-0.265702	-1.86955	-1.71355	-1.22794
14	1.05972	1.28231	1.06871	1.13734	1.07378	1.0854	1.1055	1.20573	1.23528	0.983035
15	-0.208355	-1.61761	0.727973	-0.138471	-0.939939	0.64231	0.0440641	-1.48757	-1.25025	-0.962066
16	1.61087	1.56309	1.57308	1.64891	1.60473	1.6511	1.55987	1.51496	1.5995	1.48562
18	0.790747	0.845539	0.921083	0.949168	1.21211	1.17649	1.14787	-0.221076	-0.0744969	0.748764
19	-1.70779	-0.975407	-1.32885	-1.42616	-0.392772	-0.907046	-1.2485	-1.5053	-1.44408	-1.21194
20	-1.45746	-1.58295	-1.08533	-0.875963	-1.50957	-0.884642	-0.92286	-1.16115	-0.595546	-1.6314
21	1.10006	0.617601	0.817493	1.03496	1.21404	1.03018	0.897061	0.310576	0.122506	0.595701
22	0.632994	0.864103	0.813423	0.604204	0.74045	0.668796	0.720005	0.778906	0.686057	0.551026
23	1.26255	1.40031	1.18235	1.27673	1.19454	1.33075	1.20203	1.61063	1.65426	1.19582
24	-1.2508	-1.32655	-1.84687	-1.6353	-1.52518	-1.90717	-1.75656	-2.12428	-1.82152	-1.88827
25	1.25337	1.03153	1.2581	1.17997	1.22792	1.28733	1.22904	1.6517	1.64613	1.13722
26	-0.472913	-1.82458	-0.946789	-1.28259	-1.23662	-1.44526	-1.05562	-0.881529	-1.21169	-1.15878
27	-0.00908437	-0.335372	-0.0671762	-0.2198	-0.0716099	-0.238743	-0.111544	0.152495	0.343904	-0.210672
28	-0.498196	-1.11442	-1.01756	-0.256454	-0.77887	-0.400842	-0.752647	-1.0892	-1.66331	-1.65308
29	1.4681	1.30079	1.29776	1.62633	1.49783	1.45211	1.43894	1.49939	1.55151	1.42623
30	0.888061	0.795263	0.947104	0.903481	0.893711	0.939208	0.958693	0.814937	0.8141	0.692623
31	1.54811	0.868409	1.54703	1.2456	1.39851	1.4427	1.49043	1.10502	1.06448	0.996332
32	0.517428	0.766861	0.926683	0.724411	0.942419	0.772513	0.917831	0.18317	0.493989	0.615441
33	-1.07691	-1.93021	-0.175137	-0.212537	0.151414	-0.364305	-0.00696824	-1.18138	-1.73115	-1.87657
34	1.13463	1.08227	1.12754	1.40034	1.18816	1.10409	1.20688	1.11584	0.906621	1.28542
35	0.204253	-0.584111	0.0795062	0.198928	0.113995	0.0943172	-0.131225	0.326652	0.505434	-0.228941
36	0.0345694	-0.0938918	0.128587	0.200522	0.0549284	0.149445	-0.0975464	-0.25772	-0.233516	0.551389
37	1.69597	1.9092	1.7516	1.58426	1.6293	1.73292	1.53307	1.63324	1.64519	1.56721
38	-0.625406	-1.13455	-0.903776	-0.269683	-0.93456	-0.612733	-0.799014	-1.05719	-0.688925	-0.971269
39	0.488161	0.267611	0.504947	0.835417	0.609727	0.583256	0.577012	1.47827	1.50863	0.532898
40	-1.06425	-0.927185	-0.866767	-1.20682	-0.606873	-0.650677	-0.859662	-0.939468	-1.44424	0.11575
41	0.428537	0.267893	0.607649	0.393442	0.536539	0.299249	0.605227	0.381914	0.365447	0.0136226
43	0.434483	-0.688892	0.239188	0.684476	0.839029	0.560429	0.308411	-1.50243	-1.03147	-1.55267
47	1.04585	0.989512	0.762606	0.896383	1.00106	0.95643	0.917618	1.27842	1.39277	0.423916
48	0.985047	0.806765	0.876004	0.91102	1.09944	0.880082	0.965306	1.77921	1.89328	0.857735
49	-0.512341	-0.725117	-0.538885	-1.09997	-0.254457	-1.2316	-0.179569	-1.6914	-0.795503	-1.43408
50	1.59765	1.37922	1.69923	1.56935	1.74438	1.7413	1.61042	1.5106	1.49973	1.33702
51	-1.1022	-1.57241	-1.20731	-1.50397	-1.13362	-0.955656	-1.64603	-1.93501	-1.42775	-1.65259
52	-0.307534	-0.833653	-0.768442	-2.11129	-0.653857	-0.982394	-1.36577	-0.592752	-0.752233	-0.362428
53	1.18001	0.744304	1.15045	1.08778	0.981826	1.01006	1.09191	1.1661	1.1849	1.04123
54	-1.03758	-0.369186	-0.79762	-0.365494	-0.259673	-0.793014	-0.325578	-0.53965	-1.41768	-0.426784
55	-0.818598	-1.58043	-1.36158	-0.880247	-0.573125	-1.22705	-1.27685	-1.39542	-1.13507	-1.37233
56	0.190297	-0.188326	0.173734	0.0418005	0.506034	0.0602245	0.261226	-0.253499	0.102559	0.00823569
58	-1.07506	-0.132756	-0.246709	-0.449534	-0.568708	-0.23658	-0.32752	-0.613879	-0.539428	-0.396557
59	0.654688	0.980583	0.444927	0.632161	0.80458	0.938479	1.38277	1.17027	1.0603	0.532992
60	2.74396	2.65403	2.71355	2.64913	2.79353	2.75757	2.79681	2.80351	2.95585	2.64244
70	0.641623	0.00415594	0.521041	0.560024	0.684135	0.423099	0.761555	-0.15666	0.0953058	1.01571
71	2.73462	2.65728	2.68786	2.63187	2.73934	2.71659	2.80628	2.71366	2.84464	2.61314
72	-0.938409	-0.253447	-0.934175	-0.094648	0.14993	-0.352405	0.141691	0.58193	0.591081	-0.490529
81	1.36814	1.39165	1.22254	1.2624	1.42189	1.23698	1.41483	1.91405	1.80846	1.11894
86	0.667366	0.78694	0.774054	0.816359	0.711587	0.834045	0.946794	1.12533	0.947132	0.628078
87	1.31291	1.53855	1.12338	1.67262	1.5033	1.47477	1.41053	2.14819	2.16505	0.847599
88	-1.5518	-1.95395	-1.37648	-1.2099	-1.19416	-1.6166	-1.18525	-1.59879	-1.38933	-1.90601
89	-1.22123	-0.543693	-0.276069	-1.20809	-0.783129	-0.459045	-0.0761553	-0.689797	-1.25101	-0.790583
90	0.715998	1.08543	0.938682	0.755795	1.0217	0.932065	1.07678	1.14372	1.10313	0.699834
91	0.703074	1.16348	0.975661	0.79942	0.835203	1.1859	0.807066	0.62793	0.56838	1.41413
92	0.543103	0.725243	0.647764	0.673861	0.608459	0.61472	0.643808	0.291168	0.572573	0.430634
93	-1.73937	-1.78278	-1.24876	-1.41439	-0.495209	-0.575815	-1.43386	-1.51271	-1.8365	-1.49353
94	-0.581752	-1.46718	-1.1139	-1.47927	-1.47593	-1.12433	-1.11563	-1.44994	-1.0857	-1.35488
95	-1.22385	-1.3812	-0.878152	-1.10496	-0.996828	-0.992682	-0.900475	-1.32228	-1.09493	-1.17755
97	0.671926	1.01243	0.756027	0.918933	0.643073	0.894053	0.862213	0.922783	0.874796	1.04346
98	1.34943	1.30741	1.23159	1.46509	1.29766	1.38064	1.38424	0.593521	0.593047	1.30507
100	-0.211433	-0.11056	-0.779931	-0.728375	-1.11667	-1.11117	-0.645846	0.162781	0.253793	-1.11141
101	-1.00719	-1.40261	-0.828047	-0.858197	-0.302034	-1.03061	-0.226306	-0.806307	-0.155192	-1.18385
102	1.47565	1.21061	1.55613	1.56879	1.53187	1.52753	1.60408	1.79735	1.73671	1.60095
103	2.12121	2.07255	2.00984	2.07121	2.05104	2.0397	2.08387	1.90359	1.93695	2.01825
104	0.0347186	-0.714871	0.0974034	0.0347318	-0.394783	0.0448007	-0.14827	0.0951708	0.230172	0.18532
105	-1.37075	-0.644359	0.247577	0.633296	0.262873	-0.865131	-0.184666	-1.64715	-1.4088	0.0377819
107	1.10197	0.396025	1.12788	0.581745	0.874468	1.01566	1.09043	-0.0352007	-0.0217739	1.70615
108	1.34732	0.911224	0.930345	0.890803	0.692535	1.01711	1.07129	-0.390695	-0.343081	2.07969
109	0.610813	0.426128	0.871498	0.746286	0.772589	0.935925	0.839404	0.690127	0.794937	0.530384
111	1.33883	0.90418	1.10247	1.34194	1.62148	1.43805	1.21456	-0.421794	-0.716537	0.406692
112	0.954152	0.412377	0.757903	0.816877	0.936102	0.921155	0.91688	0.95208	1.21146	0.567071
113	-1.40097	-1.46531	-1.52819	-1.62571	-1.45996	-1.0129	-1.33893	-0.586236	-1.08979	-1.38204
114	-1.21958	-1.25791	0.105204	-1.68136	-0.211783	-0.262063	-0.949958	-1.8824	-0.35463	-1.4599
115	0.0439566	0.693401	-0.387623	0.0351787	-0.151149	0.0515454	0.3309	0.789087	0.638074	0.409451
116	-0.3659	-0.69152	-0.305334	-1.42732	0.0142025	-0.156393	-0.936976	-1.51033	-0.602662	2.02362
117	0.0466018	-0.220854	0.131476	0.113298	0.405961	0.0931279	0.236083	-0.401701	-0.0416205	-0.304233
118	1.29335	1.64132	1.27545	1.41685	1.32447	1.33061	1.28068	1.31258	1.25486	1.34706
119	0.199842	0.457441	0.467133	0.455911	0.564863	0.369971	0.120822	-1.39068	-0.614696	0.853312
120	1.84092	1.48638	1.79183	1.99927	1.87359	1.6857	1.75812	1.67923	1.53237	0.85124
123	0.0290084	0.134988	0.0742105	-0.058318	-0.142511	-0.256598	0.13384	1.47164	1.55933	-0.194631
124	0.166973	-0.0910303	-0.161831	-0.147779	0.114082	0.107315	-0.262906	-0.58944	-0.362546	2.43233
125	-0.840297	-0.691698	-0.19034	-1.24133	-0.602898	-0.498953	-0.136864	-0.730473	-0.422732	1.80306
126	-0.585238	-1.35534	-0.476079	-0.790086	-1.10727	-0.965698	-1.05726	-0.863471	-0.358888	0.579439
127	-0.268899	0.00500462	-0.0435521	-0.279055	0.103706	-0.355551	-0.123817	-0.557823	-0.129019	0.563117
128	1.60262	1.43	1.64982	1.63674	1.48292	1.22367	1.65979	1.59162	1.59323	1.6761
130	-1.18207	-0.802939	-1.10041	-0.898092	-1.45816	-1.13703	-1.88863	-1.88485	-1.56934	-1.92639
131	-0.278553	-1.7731	-0.452714	-0.127576	0.097929	-0.45937	-1.20127	-0.541159	-0.231909	-0.623444
132	1.02217	1.13059	1.31186	1.19661	1.08175	1.30912	1.3283	1.68964	1.67763	1.17405
133	0.216776	0.504042	0.232194	0.169465	0.827385	-0.365904	0.573739	1.43394	1.53707	0.277177
134	-0.0143463	-0.33489	0.00327823	0.133561	0.231952	0.0111848	0.459893	0.145006	0.0700339	-0.224462
135	NA	NA	NA	NA	NA	NA	NA	NA	NA	NA
136	-0.267117	0.153121	0.179685	-0.0478297	0.0849937	-0.70318	0.0924093	1.4105	1.29782	-0.358446
140	0.638492	0.100235	0.668459	0.417711	-0.0876084	0.565052	0.441885	-0.374557	-0.976002	0.037646
141	-1.21405	-1.08084	-0.977915	-1.10698	-0.785803	-0.975539	-0.455989	-1.77182	-1.22077	-1.05163
142	1.63445	1.55986	1.60402	1.60029	1.54052	1.6063	1.5859	1.89065	1.64219	1.83031
143	1.04657	1.17113	0.795265	1.05792	0.752304	1.06763	0.83755	1.68993	1.64661	-0.139215
146	-1.29877	-1.86045	-1.24337	-1.30486	-1.25089	-0.752948	-1.58823	-1.56459	-1.2842	-1.53943
147	-2.15993	-1.05521	-2.09273	-1.75407	-1.84961	-0.944107	-1.31756	-1.09399	-0.577497	-1.35817
148	-0.604318	-0.620428	-0.211349	-1.20095	-0.0514555	-0.756999	-0.168451	-1.82852	-0.731391	-0.798034
150	1.482	0.137455	1.5525	0.527427	0.256878	1.79024	0.137212	-1.00562	-0.294732	-0.897188
151	-0.0223003	-0.263637	-0.557544	0.0674023	0.228299	-0.273586	-0.326991	-0.220331	-0.241458	-0.352994
152	0.167201	0.125178	0.26083	0.190001	0.343801	0.210282	0.454495	-0.116821	-0.0129063	0.526888
153	-1.29522	-1.93896	-1.17919	-1.22692	-1.21606	-1.50241	-0.986812	-1.01079	-1.40672	-1.98719
154	-0.192194	-0.20553	0.135678	-0.326046	-0.0796653	-0.364397	0.119977	0.24245	0.293157	0.706487
155	-1.25073	-1.69846	-1.0574	-1.08614	-0.777441	-1.42608	-1.15198	-1.7991	-1.24661	-1.24406
156	0.543963	0.431165	0.600839	0.596993	0.752662	0.717549	0.590919	0.713153	0.730371	0.212365
157	0.275289	-0.0603411	-0.0122591	0.0633778	0.210976	0.0423415	0.0807923	-0.18373	-0.00460736	-0.552934
158	1.01904	1.18986	1.1318	0.872798	1.0611	0.897587	1.14733	1.53714	1.52561	0.905067
159	1.10104	1.3843	0.908063	1.22866	0.991467	0.984705	1.07458	1.04252	1.01143	1.36128
160	-0.127381	-0.292595	-0.489072	-0.231188	-0.0404385	0.100122	-0.282806	0.0432226	0.064392	-0.40846
161	1.35796	1.02957	1.47036	1.60323	1.34394	1.50318	1.41869	1.50667	1.55046	1.45603
162	1.07879	0.967782	0.880963	0.998355	0.962263	1.04573	0.885023	0.967973	1.02014	0.739135
163	1.23976	1.42244	1.42085	1.27653	1.22214	1.45077	1.37845	1.24627	1.39252	0.827239
164	0.952033	0.939315	0.970755	0.808532	0.896555	1.11645	0.771949	1.15341	1.0711	0.843169
165	0.1241	-0.01317	0.180692	0.0617915	-0.114916	0.0684597	0.554598	0.646938	0.719516	-1.04784
166	1.90939	1.65445	2.09933	1.94202	2.01394	1.90338	1.99698	1.41799	1.38973	1.05369
167	-0.741762	-0.522338	-0.297204	-0.925826	-0.0198195	-0.825609	-0.355649	-0.581682	-1.21702	-1.4865
172	0.372555	0.384255	0.12039	0.292445	0.445164	0.312323	0.246091	0.789845	0.678489	0.644276
173	-0.594827	-0.826476	-1.19611	-0.481081	-0.894852	-0.612805	-0.578144	-1.07614	-0.480469	-0.516395
174	-1.72967	-1.13355	-0.978382	-1.20951	-1.01134	-0.354646	-0.625143	-1.29961	-0.693083	-0.74269
175	0.763974	1.01002	0.495244	0.426061	0.31516	0.595387	0.00328407	0.861292	0.991946	0.95195
176	-1.24038	-0.682402	-1.01456	-1.7994	-0.818498	-1.22186	-0.875816	-1.75947	-0.333509	-0.567133
177	-0.431156	-0.154164	-1.12302	-0.342366	-0.46528	-0.827724	-1.22878	-0.299398	-0.251695	-2.08377
178	1.36545	1.00796	1.281	1.40879	1.58526	1.22765	1.42415	0.828564	0.711559	1.08389
181	-1.08749	-1.32897	-1.56936	-0.550159	-0.553043	-1.08177	-1.12563	-1.24362	-1.11201	-0.841026
182	-0.545445	-0.523515	-1.04177	-1.4422	-1.0313	-0.393126	-0.564877	-1.13562	-1.41201	-1.7901
183	0.219056	0.59082	0.362633	0.127819	0.166662	0.0549652	0.61294	-0.336264	0.00197371	1.06231
185	-0.473637	-0.393051	-0.359305	-0.317891	-0.368033	-0.160365	-0.143743	0.292052	0.592485	-0.723007
186	-1.32618	-0.853057	-1.526	-0.889128	-1.2557	-1.25765	-0.363067	-0.799139	-0.585674	-0.536298
187	-0.85315	0.182999	-0.607631	-0.803633	-0.48525	-0.233064	0.541117	-1.15546	0.0154207	-0.980823
189	-1.3326	-1.26525	-0.342229	-0.900927	-0.85884	-0.843808	-0.899046	-0.843521	-0.447061	-1.70236
190	-0.415059	-0.487478	0.030301	0.0694047	-0.0993371	0.0445065	-0.116961	-0.741026	-0.327743	-0.841724
191	1.16323	1.45021	1.16574	0.987526	0.941157	1.08533	1.18563	1.55409	1.498	1.15278
196	-0.478777	-1.38608	-0.672776	0.174788	-0.671678	-0.0704121	0.263188	0.855877	0.855124	-1.00972
197	-1.20261	-1.85213	-0.860878	-1.15311	-1.22283	-1.57979	-1.17467	-1.77675	-0.71446	-1.74014
199	-0.785488	-0.467552	-0.115809	-1.20586	-0.00224106	0.0100888	0.345649	-1.56777	-0.690172	-0.191363
202	0.942304	0.199262	0.329311	1.00427	0.627123	0.400592	0.601483	0.667371	0.558292	0.923797
203	1.43538	1.54293	1.54844	1.61098	1.50905	1.53343	1.35818	1.20122	1.17781	1.64224
204	0.450463	-0.188559	0.221198	0.219066	0.301734	0.255522	0.257047	0.917565	1.02175	-0.0389542
205	0.73681	0.445538	0.26326	0.774799	0.659497	0.305119	0.626644	0.753645	0.799784	0.508789
207	1.18712	1.23824	1.22896	1.32081	1.33094	1.23742	1.16347	1.51241	1.46335	0.912673
208	-0.128066	-0.2116	0.136113	-0.479897	0.163454	-0.095434	0.0635606	-0.465049	-0.543497	0.116695
210	0.944009	1.04116	0.929899	1.13315	0.674068	0.903597	0.858948	0.678929	0.600762	0.557985
211	0.858657	0.858998	0.801227	0.969826	0.781685	0.909731	0.886702	1.17681	1.13794	0.523437
212	-1.77323	-1.68795	-1.42713	-1.50537	-1.54296	-1.44427	-1.27238	-1.93829	-1.5254	-1.87526
213	-0.454647	-0.981656	-0.69296	-1.12108	-0.101593	-1.05206	-0.922297	-1.0128	-1.52984	-0.956078
214	1.46435	0.884844	1.50237	1.10117	1.30503	1.04265	1.26069	1.36863	1.46435	-2.13274
215	0.244739	0.28741	0.484883	0.183491	0.44315	0.359145	0.403214	0.586905	0.678117	0.00929148
216	1.34528	2.24665	1.66941	1.01081	0.858757	1.78428	0.793859	-1.54059	-1.03437	2.17647
217	1.75391	2.12909	1.15947	1.68001	1.20843	1.52314	1.46745	1.26706	1.29636	1.89481
218	-1.16309	-1.49094	-1.12589	-1.1621	-1.05419	-1.35731	-0.977401	-0.880114	-1.01278	-1.27316
219	-0.0577898	0.0497397	0.239942	-0.427623	-0.285862	0.145107	-0.115028	0.370366	0.454019	-0.30228
220	-0.461162	0.221237	-1.20988	0.334537	-1.19863	-0.558202	0.259911	-0.576705	-0.237184	2.17368
221	-0.724347	-0.459529	-0.143198	-0.0624815	0.313037	-0.0610567	0.270504	0.235892	0.0881414	-0.081879
222	-1.44406	-1.63064	-1.3294	-1.27357	-0.569544	-1.25964	-1.53837	-1.54656	-1.75795	-1.87297
223	1.86026	1.8936	1.84078	1.69029	1.69702	1.90675	1.72126	1.72258	1.63294	2.10058
224	1.28555	1.37413	1.33416	1.231	1.26416	1.36311	1.23642	0.885324	0.976215	1.25575
225	-0.485254	-0.221321	-0.29206	-0.0493007	0.0455925	-0.0235256	0.111182	-1.72821	-1.15232	-0.177968
226	2.45979	2.45299	2.42684	2.37595	2.305	2.43914	2.454	2.37793	2.64379	2.34823
228	-1.27135	-1.42002	-0.364862	-1.03987	-0.8009	-0.871545	-1.19349	-0.643123	-1.27083	-1.52566
229	-1.2158	-1.21509	-1.85696	-0.880526	-1.85686	-1.03156	-2.27032	-2.02383	-2.54699	-1.99651
230	-0.165819	0.652958	0.0892671	0.608317	0.513305	0.100037	1.4214	0.83849	1.0767	0.997376
231	2.16085	2.13218	2.20832	2.10791	2.10086	2.18849	2.10685	2.12476	2.34063	2.06336
238	-0.306892	-1.04878	-0.458874	0.0418482	-0.0188639	-0.355646	-0.307918	-0.546888	-0.220331	-0.259331
239	-0.824551	-1.09034	-1.27486	-1.15674	-0.287375	-1.64385	-0.6424	-0.706195	-0.262554	-0.408785
240	0.13979	-0.0583087	0.174093	0.154428	0.538737	-0.0154831	0.289119	-0.2131	-1.26072	-0.670872
241	0.658867	-0.299547	0.511152	0.268904	0.0688534	0.569757	0.665903	-0.212986	0.240092	-0.0301879
242	-1.31667	-1.49774	-1.19632	-1.25505	-0.882014	-1.27177	-1.19039	-1.80893	-0.467155	-1.19373
244	NA	NA	NA	NA	NA	NA	NA	NA	NA	NA
245	-0.881419	-0.941198	-0.332124	-1.20829	-0.405227	-0.662286	-0.715473	-1.74314	-0.775889	-0.849241
246	-1.11577	-1.32385	-0.41234	-0.979225	-0.799133	-0.902781	-0.493551	-1.8639	-1.55166	-1.57818
247	-1.39163	-0.607052	-0.847219	-1.45019	-1.25938	-0.53931	-0.372375	-0.843197	-0.516882	-1.19264
248	-1.31706	-1.6762	-1.44873	-1.545	-1.16804	-1.46619	-1.29459	-1.71464	-1.41034	-1.8239
249	-1.17584	-1.3647	-1.23451	-1.68271	-1.27784	-0.867085	-1.67492	-0.70455	-1.22935	-0.141049
250	-1.57147	-1.75499	-1.35982	-1.52528	-1.39428	-1.50264	-1.03916	-1.95147	-1.66019	-1.79368
251	-0.644715	-0.509953	0.143631	-0.211583	-0.589871	-0.516679	-0.419232	-1.38669	-1.01003	-1.00762
257	-0.0176828	-0.529914	-0.207423	-0.378299	-0.134766	-0.616048	-0.0550387	-1.76798	-1.0979	-0.564308
258	-1.12007	-0.859046	-0.411855	-0.908085	0.106653	-0.472225	-0.783736	-0.936351	-0.347034	-1.07105
259	-1.3024	-1.28639	-1.27603	-1.02753	-1.50901	-1.51147	-1.49831	-1.74508	-1.5998	-1.50926
262	0.958226	0.575518	0.651073	1.03796	1.08107	0.97301	1.06213	1.29737	1.2908	0.775541
265	-0.409666	-0.237218	-0.24005	-0.15607	-0.115498	-0.205064	-0.2894	-0.433606	-0.294704	-0.243781
266	-0.163315	-0.231799	-0.0600251	0.00345818	-0.387266	-0.242521	0.0226247	-0.411808	-0.255361	-1.55561
267	1.39257	0.896294	1.08386	1.0203	0.893688	0.174058	0.650234	1.14524	1.10111	0.0433461
268	-1.06058	-0.632945	-0.963618	-1.54701	0.202202	-0.869209	-0.410609	-0.36523	-0.404869	-0.380584
269	-0.670594	-1.36412	-0.673858	0.678991	0.916819	0.592528	-0.314403	-1.49465	-1.48453	-1.32747
270	-0.314761	-0.986038	-0.619051	-2.06988	-1.49288	-1.04785	-0.150461	-2.32295	-0.387818	-0.230637
271	1.62187	1.51168	1.55963	1.53236	1.65495	1.5854	1.6281	1.09611	1.18837	1.93185
272	1.42617	1.21881	1.26133	1.36965	1.33071	1.45054	1.21119	0.581751	0.945212	1.0428
273	1.49789	1.26457	1.36201	1.3367	1.31453	1.4553	1.46747	0.470961	0.392147	1.80148
274	1.11052	0.870183	0.894298	0.965849	0.825639	1.07006	0.795383	0.936473	1.04366	0.55766
275	1.32205	0.631216	1.23948	1.36949	1.11301	1.27602	1.31592	-0.23919	0.0484373	0.951129
276	NA	NA	NA	NA	NA	NA	NA	NA	NA	NA
278	NA	NA	NA	NA	NA	NA	NA	NA	NA	NA
279	NA	NA	NA	NA	NA	NA	NA	NA	NA	NA
280	NA	NA	NA	NA	NA	NA	NA	NA	NA	NA
283	-0.341115	-0.160133	0.118529	-0.1674	0.102656	-0.227133	0.428723	-0.2402	-0.0741157	-0.667888
284	-2.76243	-1.95468	-0.453282	-1.23732	-0.873103	-1.04172	-0.789517	-0.969905	-0.622983	-2.32198
285	-0.360369	-0.470844	-1.33268	-1.17895	-1.63781	-1.30146	-1.19346	-1.53148	-2.0312	-1.45275
286	0.0987597	-0.452246	-0.425087	0.0759873	0.220793	-0.180104	-0.880915	-0.320071	-0.206161	-1.25457
287	1.70368	1.3428	1.86987	1.78226	1.87268	1.90077	1.95979	-0.507635	-1.29704	1.88095
288	1.48116	1.39734	1.44184	1.2617	1.52555	1.68903	1.51396	-0.417798	-0.392724	1.6866
290	-1.46586	-0.933448	-1.85534	-0.697842	-1.02331	-1.52567	0.0405948	0.670275	0.949214	-1.65592
291	-0.128266	-0.87005	-0.143376	-1.55207	-0.500658	-0.0661822	-0.141055	-0.675369	-0.275658	-0.860962
292	1.57381	2.10075	1.88843	1.95381	2.14694	1.84715	1.85293	2.41348	2.43268	1.73916
293	2.21428	2.52493	2.17151	1.98754	2.01489	2.23706	2.06092	2.29102	2.30925	2.18092
301	0.351282	0.823602	0.185034	1.01196	0.0120681	0.38293	1.44361	2.27522	2.09185	0.265022
302	-1.84879	-1.47177	-0.905504	-1.7907	-1.69543	-0.843904	-0.573701	-1.62657	-1.60569	-1.60544
303	-0.334966	-1.01592	-0.0746439	-0.685629	-0.830988	-0.988837	-1.09612	-0.0322924	-0.43669	-1.40831
304	0.434	0.823093	0.0669018	0.443929	0.136075	0.192821	0.799975	1.80718	1.63615	0.266224
305	-0.786562	-0.274664	-1.07799	-0.838499	-1.05322	-1.18298	-0.716905	0.395583	0.554448	-0.696027
306	-0.0196652	0.145782	0.555333	0.00553539	-0.295356	-0.265987	0.885028	1.00543	0.455762	-0.363801
307	0.346557	0.596142	0.359528	0.807154	0.453779	0.709189	0.546216	1.41564	1.40184	-0.0946405
308	1.61168	1.90763	1.87758	1.95278	1.40346	1.54505	1.70333	2.22492	2.28837	1.96
309	1.72436	2.03054	1.97592	1.88141	1.87636	1.968	1.87189	1.68381	1.72784	1.37765
310	1.51398	1.36779	1.60556	1.46493	1.46618	1.44523	1.55213	1.50222	1.37604	1.58295
311	0.418465	0.527545	0.408995	0.810337	0.471741	0.746585	0.725593	1.75254	1.92846	-0.0992955
312	-0.926952	-1.33051	-0.766162	-0.997118	-0.770762	-0.8601	-0.903373	-0.708869	-1.30732	-1.31216
313	0.131662	0.101249	0.380384	0.206379	0.412539	0.260495	0.449703	-0.165469	-0.0277164	-0.0547582
314	-1.00942	-0.0327954	-0.142683	0.0594992	0.0780819	-0.043896	-0.440345	-0.115341	0.0222605	-0.777464
316	-0.638165	-0.861232	-0.917892	-0.290185	-0.530444	-0.155499	-0.138545	0.292257	0.577453	-1.09898
317	-0.0873661	0.253082	0.00154498	0.109396	0.00464971	-0.0348937	-0.288039	0.429714	0.337116	0.161754
318	0.791366	0.787299	0.594547	0.547881	0.550068	0.538898	0.904706	0.3988	0.395299	0.797853
319	-2.11872	-1.26444	-0.837061	-2.23373	-1.6134	-1.14989	-1.69958	-1.82541	-1.27045	-1.35353
320	0.343039	0.00817417	0.163367	0.675684	0.76219	0.498174	0.727771	-0.632098	-0.859793	-0.228428
321	0.0812846	-0.514121	-0.519966	-0.649327	-0.418736	-0.488581	-0.57572	0.145172	0.304107	-1.38333
322	1.15987	1.0697	1.04923	1.33421	1.19306	1.17518	1.22302	0.414429	0.437813	1.15341
323	0.779921	0.631949	0.855888	0.7078	0.619731	0.927917	0.733227	0.752984	0.71265	1.11652
324	0.528824	0.552018	0.50673	0.698861	0.570125	0.41062	0.539291	0.308443	0.325912	0.305139
325	-0.293618	-0.274745	-0.222608	-0.52514	0.160421	-0.405085	-0.0997958	-0.305601	-0.34634	-0.373349
326	-0.945157	-0.194253	-0.538526	-0.937669	-0.17472	-0.0911174	-0.357473	-0.391011	-0.190021	-1.02319
327	1.41514	1.10556	1.30612	1.48547	1.28757	1.32881	1.40407	1.15312	1.14358	1.09751
328	1.54439	1.92958	1.60358	1.59775	1.38947	1.60995	1.60473	1.95822	1.88206	1.60265
329	1.26394	1.34267	1.34846	1.38842	1.24105	1.29401	1.24908	1.57862	1.57169	1.41748
330	-0.54141	0.552705	-0.202285	-0.154969	-0.269524	-0.374536	-0.150823	0.31442	0.139652	-0.892869
331	-0.0383944	0.197099	0.0927986	-0.0304637	0.090742	-0.0679785	-0.0597637	0.0646823	-0.0873332	-0.0789133
332	-0.496186	-0.444085	-0.34891	-1.07371	0.030942	-1.46198	-0.563813	1.42181	1.38526	-0.623895
333	2.30853	2.25091	2.29455	2.25406	2.34075	2.26008	2.34303	-0.024643	-0.188913	2.08303
334	2.37839	1.91185	2.30972	2.15376	2.20669	2.25602	2.2651	2.02719	2.1198	2.14692
335	-1.0326	-1.10614	-0.725569	-0.490704	-0.765176	-0.441025	-0.703366	-0.41838	-0.816039	-1.10377
336	-0.797039	-0.929578	-1.33493	-0.71432	-0.885481	-0.856669	-0.672869	-0.630711	-1.35076	-0.289667
337	-0.284501	-0.458486	-0.478036	-0.562755	-0.361166	-0.744174	-0.113809	-0.612268	-0.256999	-1.12405
338	-1.52845	-0.738897	-0.647112	-0.660194	-0.270963	-0.315696	-0.271187	-1.72486	-1.53212	-1.33282
339	-0.193483	-0.595306	-1.1871	-0.911743	-0.668293	-0.832784	-0.663879	-0.6133	-0.436345	-0.666245
341	0.788899	0.117454	0.554884	0.182083	-0.293834	0.361694	0.930369	0.0963455	-0.344756	-0.513552
343	-1.11668	-1.24374	-0.573939	-1.06736	-1.16454	-0.919602	-0.537745	-1.43267	-1.80037	-0.745723
344	0.221122	-1.24085	-0.394755	-0.471645	-0.745723	-0.391682	0.525716	-1.14511	-1.23609	-1.51067
345	-1.03117	-1.50195	-1.06516	-1.56817	-1.10471	-1.34621	-0.883513	-1.6332	-0.916949	-1.20037
346	-0.242406	-0.349152	0.122602	-0.191556	0.0109559	0.106506	-0.119003	-0.0906764	-0.195444	-0.121466
347	0.321187	0.507594	0.312167	-0.68269	0.1465	0.736087	1.35625	-0.226379	-0.600893	0.353426
348	1.27522	1.00165	0.701573	0.962538	0.182205	0.889028	1.28923	1.21741	1.05912	-0.0229412
350	-0.413951	-0.622194	-0.39821	-0.738935	-0.931459	-1.04163	-0.252086	-0.373477	-0.628085	-0.380041
351	1.53512	1.52209	1.42687	1.43555	1.18562	1.52932	1.53382	1.06767	1.02482	1.65088
353	0.567181	0.839406	0.463048	0.418485	0.135272	0.345398	0.53618	0.843469	0.895712	0.184084
354	-1.05041	-1.09827	-1.15823	-1.01149	-0.829836	-0.581082	-1.00818	-0.880296	-0.819793	-1.39782
355	0.0721351	0.109332	-0.0822349	0.245393	0.440262	-0.182024	0.468502	0.801196	0.901652	-0.0520736
356	-0.61022	-1.21557	-0.605584	-1.16131	-0.749243	-0.519894	-0.207579	-1.38707	-0.580865	-0.590438
357	0.879063	0.970419	0.930914	0.876418	1.00974	0.917097	0.787362	1.07788	1.26028	0.25248
358	0.470081	-0.0331441	0.347031	0.548151	-0.839222	-0.899002	0.792387	-1.3555	-1.62044	0.580919
359	-0.749227	0.190907	-0.520487	-0.271727	-0.437229	-0.0102649	-0.7667	-0.396425	0.198193	0.125685
360	-0.465746	-0.060643	-0.475408	-0.0447852	-0.115752	-0.929564	-0.460637	-0.528739	-1.19753	-0.565451
361	-1.75158	-2.4458	-1.92095	-0.477309	-0.768941	-0.794258	-1.81367	-1.91975	-2.23317	-2.42293
362	-0.963066	-1.21022	-0.263808	-1.12622	-0.319354	-0.35602	-0.716875	-0.560925	-1.21713	-1.34532
363	-1.79647	-1.45288	-1.49967	-1.77099	-1.49641	-1.60992	-1.4355	-2.02618	-1.65066	-1.52268
364	0.0672783	-0.23719	-0.100114	-0.0917833	0.130824	-0.232637	0.298883	-0.390968	-0.393582	-0.611587
366	-1.53255	-1.72887	-0.859672	-1.38052	-0.962339	-1.41993	-1.00506	-1.66538	-1.6755	-1.44479
367	-0.0266608	-0.204906	0.782936	0.65549	0.946306	0.0708482	0.643614	0.264732	0.3502	-0.127527
368	-1.90897	-2.0131	-1.47308	-1.81565	-1.48215	-1.31471	-1.65453	-1.57653	-1.69032	-2.07582
369	1.10072	1.0947	1.03967	1.13305	1.11739	1.14119	1.22151	1.07424	1.09076	0.98427
372	1.99985	1.84121	1.81794	1.84357	1.70146	1.77181	1.80212	1.71365	1.84217	1.75897
373	0.562307	0.958989	0.727757	0.620991	0.56983	0.537417	0.496245	0.542298	0.52713	0.88637
374	-0.657306	-0.711297	-0.49111	-0.460987	-0.747137	-0.706458	-0.52468	0.153341	0.084403	-0.745759
375	-1.11607	-1.69544	-1.04409	-2.14032	-0.748316	-1.16802	-0.344117	-1.83204	-1.74244	-1.19434
377	2.18409	2.23873	2.09486	2.18524	2.10887	2.10682	2.16434	1.85751	1.74523	1.96429
378	1.80955	1.79428	1.59632	1.68129	1.61577	1.79668	1.67458	2.10911	2.11736	1.73953
379	0.935146	0.676384	0.803028	0.782669	1.02116	0.679902	0.872011	0.573341	0.500646	0.230058
381	1.58008	1.3864	1.67847	1.62545	1.60754	1.59424	1.6493	1.47873	1.39471	1.31235
382	0.479007	0.50463	0.593949	0.503321	0.77185	0.62561	0.56448	1.21157	1.14252	0.0469493
383	-0.565407	-0.12513	0.0600434	-0.140375	-0.600474	-0.20942	-0.267513	-0.532063	-0.620792	-0.562678
384	0.80665	1.16931	0.532748	0.436961	-0.0754191	0.690149	0.4306	0.215493	0.146551	1.97132
387	1.81523	1.62074	1.63114	1.83099	1.84975	1.82842	1.8856	2.31752	2.31776	1.56211
388	0.104447	0.797848	-0.324501	0.627421	0.310098	0.0276206	0.621564	0.488513	0.533945	0.0206938
389	1.55293	1.364	1.50163	1.77638	1.47554	1.44132	1.70301	1.78852	1.9781	0.44123
390	1.05936	0.953013	0.52839	0.835082	1.4026	1.00214	0.730594	1.7207	1.74767	0.0904484
391	1.10141	0.908275	1.14652	1.01976	1.0901	1.03548	1.20989	1.40343	1.42877	0.49486
392	1.68822	1.49126	1.52374	1.50838	1.47069	1.65908	1.5113	1.65496	1.75474	1.64185
393	-0.488803	-0.18723	-0.514581	-0.529423	-0.878428	-0.647145	-0.216211	-0.46828	-0.360023	-1.11168
394	0.596082	0.376572	0.567551	0.519008	0.726196	0.595431	0.664173	0.142618	-0.00164928	0.372972
395	-0.355695	0.0870259	-0.0536913	0.171576	-0.477302	-0.537621	0.0345399	-0.0513101	0.0363766	0.877461
396	0.832499	0.946448	0.653492	0.760512	0.851728	0.828045	0.780865	1.25623	1.38179	0.159835
397	0.317427	0.067102	0.613753	0.413444	0.459143	0.298527	0.529003	-0.386877	0.241838	-0.736712
398	-0.441359	-0.901313	-0.333795	0.0749926	0.0769001	-0.0867477	-0.0181811	-0.347816	-0.0758504	-0.358984
399	-0.672145	-1.07094	-0.70761	-0.552824	-0.729441	-1.25217	-1.08144	-1.84369	-1.25543	-1.74076
400	1.17026	1.51827	0.963217	1.04822	0.98603	1.04397	1.01652	0.752753	0.473758	1.30017
401	-0.926717	-0.903583	-0.425142	-1.12735	-0.806348	-0.327725	-0.12303	-0.651206	-0.982421	-1.34317
402	1.52045	1.21728	1.42481	1.4194	1.34849	1.5428	1.43522	1.20989	1.28366	0.757057
403	0.154556	-0.412781	-0.129816	-0.0231593	0.366164	0.242478	-0.436596	-0.0343558	-0.617305	0.218883
405	-1.01981	-0.897754	-1.41778	-1.15392	-0.100659	-0.423251	-0.2646	-0.0896832	-0.31684	-0.420996
406	0.774364	0.641675	0.561207	1.18121	0.63081	0.391834	0.791444	0.246397	0.0643411	0.851189
407	0.0698156	-0.196484	0.117846	-0.0330822	0.296964	-0.0666699	0.294006	-0.315229	-0.0894238	-0.17778
408	-1.3593	-1.66445	-1.5475	-1.42643	-0.874223	-1.45546	-1.30537	-0.136936	0.0336015	-1.87981
409	0.75011	1.2146	0.63951	0.880803	0.641742	0.638361	0.864785	1.25888	1.18316	0.179827
410	0.293975	0.209366	0.616951	0.35088	0.110133	0.646818	0.35737	0.0887297	0.164793	0.453689
411	-0.205263	-0.31205	-0.453013	-0.488321	-0.777743	-0.30125	-0.330841	-0.24421	-0.143406	-0.0880692
412	-0.226563	-0.0613247	0.283532	-0.120987	0.290079	0.0292124	0.105129	0.244965	0.34481	0.663038
414	-0.503011	-1.13963	-0.961137	-0.747406	-0.196403	-0.206007	-0.318109	-0.532302	-0.077815	-1.22704
415	-0.172419	-0.332318	-0.0234275	-0.318172	-0.274286	-0.24925	-1.04718	-0.0688053	0.0481913	-0.624506
416	-0.232727	-0.374621	-0.417381	-0.410024	-0.80831	-0.648875	-0.366642	-0.978179	-0.0218037	-0.368833
417	0.0440972	-0.052952	-0.198305	-0.28015	0.0521501	0.131016	-0.0310364	-0.477004	-0.303279	-0.230748
419	-0.803701	-0.82368	-0.493827	-0.169073	-0.32698	-0.326797	-0.478689	-1.75506	-0.443295	-0.648433
420	-0.0999347	-0.426878	0.108023	0.121841	0.0235417	-0.562349	0.308505	-0.47241	-0.299831	-0.286101
421	-0.275773	-0.237381	-0.469021	-0.0728952	0.0429945	-0.20447	-0.229611	-0.129495	-0.598215	0.0284527
427	1.7515	1.7971	1.71929	1.64649	1.85354	1.79095	1.87363	0.98107	0.979935	2.2161
429	-0.997583	-1.44797	-0.426347	-0.297686	-0.699122	-0.258424	-0.750591	-1.2404	-0.843091	-1.50844
430	-2.45717	-2.17838	-2.32576	-2.15345	-1.55744	-2.12227	-0.981	-2.85201	-2.30453	-2.0388
432	-0.721892	-1.71206	-0.985152	-1.24778	-0.566844	-1.25185	-0.504144	-1.13179	-1.44723	-1.85972
433	-0.779123	-1.17722	-0.747663	-0.994107	-0.7306	-0.103745	0.196922	-1.03736	-0.848832	-1.05715
434	-0.596342	-0.753738	-0.864656	-1.4337	-1.27309	-0.983586	-1.09525	-1.94364	-0.646327	-0.924184
435	0.896149	1.17434	0.598824	0.976758	0.658652	0.670553	0.728802	0.723555	0.791031	0.906507
438	-0.603875	-0.677484	-0.543852	-0.387137	-1.68163	-0.269876	-0.430048	-0.970281	-0.544499	-1.40522
439	1.44469	1.48933	1.44742	1.3795	1.44587	1.46288	1.52908	1.42921	1.45979	1.20534
440	1.47262	1.65191	1.42798	1.43828	1.45679	1.54069	1.244	0.604285	0.502455	1.65361
443	-1.62677	-1.52212	-1.18873	-0.629747	-1.42632	-1.3985	-1.65141	-1.3347	-1.07974	-2.2846
444	0.135435	-0.484754	0.353007	-0.220358	0.148139	0.169269	0.298523	0.735825	1.15789	0.113357
445	0.538898	1.19307	0.239764	1.04101	0.0698714	-0.216028	0.631666	1.27065	1.17095	0.818504
460	1.48212	0.946364	1.39844	1.41841	1.57575	1.49664	1.49006	-1.13063	-1.60563	1.68218
462	-1.25001	-0.588955	-0.336457	-0.373963	-1.19488	-0.653889	-0.285845	-1.56361	-0.391425	-0.550626
463	0.670127	0.537595	0.34696	0.50964	0.521562	0.383815	0.320318	0.38809	0.506136	0.421468
466	0.190686	0.348245	0.333591	0.627588	0.288226	0.42212	0.3649	0.776723	0.55822	0.272264
467	-0.968864	-1.14961	-0.565761	-0.783652	-0.543106	-0.965385	0.108965	-0.201324	-0.120481	-1.33639
468	1.76695	1.86625	1.79666	1.68863	1.62685	1.7257	1.64157	1.87301	2.02677	1.85343
471	1.43929	1.78699	1.3724	1.48533	1.29273	1.45987	1.36831	1.71836	1.72328	1.44
472	-0.419895	-0.47467	-0.220796	-0.374805	0.0194024	-0.73902	-1.13396	-0.71019	-0.337116	-0.309714
473	-0.910043	-1.47789	-0.426477	-0.949033	-1.18704	-0.588897	-0.64405	-1.61049	-1.09026	-1.28379
474	-1.11827	-1.40344	-0.37743	-0.761589	-0.755257	-0.424953	-0.799984	-1.58829	-1.15077	-1.52193
475	1.36588	1.33729	1.10642	1.37167	1.00548	1.34184	1.32776	1.28993	1.14254	0.893242
476	2.13827	2.00939	2.01066	1.92772	1.96917	1.95752	2.11464	1.65972	1.67629	2.21574
477	1.30096	0.786222	1.34951	1.56364	1.65725	1.49686	1.44986	-0.872225	-0.208486	-0.203991
478	1.4456	1.69981	1.86	1.91941	2.06117	1.9177	1.9307	-0.550568	-0.510175	1.26524
479	-1.47943	-0.620881	-0.819642	-0.345481	-0.119803	-0.809727	-0.313043	-0.366095	-0.205965	-0.578292
480	-0.791764	-1.61638	-0.567199	-1.54696	-0.764874	-0.481162	-0.15902	-1.36067	-1.07302	-0.306729
481	2.38827	2.57358	2.53263	2.4838	2.44625	2.34481	2.45987	1.41513	1.44433	2.62303
482	0.957979	0.248482	0.959621	1.03695	1.25446	1.08217	1.25599	-0.22481	-0.57722	1.09929
483	1.70067	1.45022	1.44119	1.53087	1.49672	1.75031	1.71285	2.13626	2.24138	1.80774
486	0.0231003	-0.123685	0.0381274	-0.0929204	0.239106	-0.260891	0.447996	-0.0213315	0.256742	-0.464293
487	-0.395534	-0.467689	-1.48407	-0.482047	-0.521611	-1.18894	-0.240912	-0.71284	-0.491312	-0.684954
488	2.23741	1.85804	2.24203	2.05126	2.13694	2.29481	2.21499	2.04482	2.08466	2.06236
489	-1.50685	-0.656704	-0.991417	-1.3327	-1.3244	-0.238108	-0.950552	-0.367895	-1.16456	-1.30748
490	1.84937	1.16271	1.93512	1.5584	1.46597	1.95223	1.80173	1.51427	1.75915	1.56268
491	1.37757	0.233976	1.45435	1.15777	1.55551	1.57124	1.27644	-0.456434	-1.19009	1.43277
492	-0.0841513	-0.485773	0.0943225	0.148221	0.0355791	0.394119	-0.514195	-1.16386	-0.569695	0.00274835
493	-0.246102	0.102789	0.399769	0.285601	0.609508	0.235089	-0.197759	0.0584717	0.11347	-0.474437
495	-0.776505	-1.48039	-1.2551	-1.20748	-1.15554	-0.306451	-1.64381	-0.681107	-0.934736	-1.36468
496	-1.21612	-1.60034	-1.00548	-1.37442	-0.996914	-1.23774	-1.14584	-1.59723	-1.29092	-1.32007
498	-0.852961	-1.3844	-0.922452	-1.06127	-0.24867	-0.390962	-1.16575	-0.710991	-0.67861	-0.605793
501	1.45826	0.992728	0.874275	1.14919	1.13771	1.06812	0.971444	1.38927	1.22933	0.840801
506	2.42612	2.52367	2.50336	2.4146	2.42723	2.48461	2.52821	2.38805	2.41011	2.40972
509	2.16201	2.17397	2.21671	2.14016	2.10409	2.18216	2.22497	2.14664	2.21601	1.73645
513	0.615021	0.680693	0.94679	0.710905	0.881922	0.900584	0.712271	0.80321	0.841462	0.527413
514	2.01802	2.61344	2.42551	2.51936	2.04876	2.12926	2.29324	2.1356	2.04912	2.62532
515	2.23933	2.02041	2.24647	2.29434	2.22247	2.21276	2.3172	2.17454	2.09152	2.059
516	1.0293	1.44795	1.11582	1.05813	1.07434	1.18264	1.118	1.17933	1.0518	1.29304
517	-0.677209	-0.62262	-1.1134	-0.524835	-0.163595	-0.17916	-0.252614	-0.408896	-0.0338992	-0.356519
518	2.13554	2.10594	2.16945	2.07497	2.10494	2.13124	2.16898	2.1466	2.0542	2.02158
521	1.54568	1.62798	1.4217	1.42452	1.45085	1.42783	1.45773	1.13737	1.06688	1.3817
522	1.99306	2.12475	2.06856	2.01092	1.93732	2.02963	2.03874	1.93886	1.90246	1.98291
523	1.48056	1.24352	1.32765	1.46592	1.5984	1.60802	1.54179	1.23493	1.20922	0.948433
525	-0.416346	-1.0977	-1.08144	-0.667679	-0.396628	-0.594619	-0.697932	-0.883823	-1.41863	-1.13187
526	2.25694	2.11914	2.11742	2.12384	2.26471	2.21923	2.24107	1.82254	1.89468	2.0751
527	1.74514	1.41441	1.68163	1.6102	1.63494	1.73876	1.75111	1.48531	1.44965	1.53189
528	1.01984	0.690548	0.925693	0.945086	0.917233	0.889093	0.981331	0.798167	0.717102	0.961049
529	1.84543	1.8913	1.94056	1.88652	1.81843	1.95428	1.93064	1.53787	1.58004	1.60164
533	1.98399	1.69898	1.94224	1.99948	1.8917	1.95924	2.09106	1.72552	1.83628	2.39297
534	0.589221	0.640932	0.867506	0.702446	0.81001	1.29884	0.764729	0.0625722	0.330263	0.595974
535	1.25953	1.1027	1.12793	1.21832	1.5156	1.37323	1.37325	0.478516	0.580426	1.01466
537	2.01908	1.99254	1.97479	1.88347	1.92255	2.1044	2.05102	1.6917	1.77757	2.22835
538	1.07615	1.11338	0.949953	0.893192	0.897885	1.06292	0.945117	0.836002	0.766361	0.961207
539	-0.461956	-1.25006	-0.915429	-1.14394	-0.19236	-1.54839	-1.06556	-0.989119	-0.333758	-1.25184
540	0.712022	0.657503	0.377369	0.399463	0.299083	0.142246	0.487482	-0.174738	-0.00709348	0.317648
545	0.340987	0.729184	0.401307	0.360742	0.279705	0.46639	0.0945998	0.596425	0.420577	0.639663
546	1.15309	1.22776	1.24846	1.13637	1.43634	1.14814	1.18901	0.859564	0.72838	1.10219
547	1.24236	0.908064	1.35322	1.23479	1.42654	1.23387	1.37527	-0.419437	-0.35653	1.19535
549	1.24012	1.10711	1.3775	1.31305	1.22447	1.37418	1.34688	0.742239	0.864844	1.42771
550	0.807054	0.836583	0.963037	0.787145	0.814565	0.940524	0.998687	1.0715	1.12447	0.75266
551	-1.22721	-1.69358	-1.40399	-1.43989	-1.47552	-1.34464	-1.08044	-1.74598	-1.27779	-1.51302
552	-1.07002	-1.14126	-1.18578	-1.26102	-0.967835	-1.32753	-0.915723	-1.20681	-1.34163	-1.78196
553	-1.11089	-1.35063	-1.09284	-0.810564	-1.08633	-1.1229	-1.00178	-1.45998	-0.752393	-1.0578
554	-1.58859	-1.92353	-1.55288	-1.58668	-1.63064	-1.57929	-0.936831	-1.65106	-1.51672	-1.6564
558	-0.795797	-0.963191	-0.342137	-0.888494	-0.650195	-0.848225	-0.542923	0.959055	1.00686	-0.476076
563	-0.690546	0.0840929	-0.736054	-0.530371	-0.784091	-1.01741	-0.407996	-1.79911	-0.631302	-0.754191
566	-1.7958	-1.53804	-0.669624	-1.19284	-1.367	-1.14166	-0.124777	-1.07901	-1.24785	-1.46227
567	2.62568	2.56356	2.50491	2.61072	2.67883	2.54551	2.62071	2.54366	2.58027	2.66242
570	-0.175416	-1.22025	-0.440573	-0.783244	-0.164335	-0.957564	-0.625587	-0.633571	-1.0728	-0.250712
571	0.141157	0.0710298	0.430121	0.131828	0.508878	0.265857	0.262458	1.09278	1.13023	0.255758
572	0.763759	0.397889	0.788408	0.800076	0.738118	0.782507	0.781643	0.710119	0.690119	0.352532
573	1.31539	1.39668	1.48402	1.21336	1.18727	1.41397	1.33663	0.803216	0.794333	2.04772
574	-1.53536	-1.62426	-0.842602	-0.635518	-0.662038	-1.03061	-1.23944	-1.34932	-1.5694	-1.39511
575	-0.301533	-0.195735	-0.00483194	-0.702482	-0.403578	0.225017	0.106678	-0.215834	0.178825	-0.567155
576	1.08483	0.817394	1.29871	1.24947	1.41472	1.57982	1.28247	0.655225	0.648853	0.134629
577	1.29691	1.83248	1.27444	1.5228	1.37283	1.46558	1.08915	-0.91642	-0.438758	1.56241
578	-0.635658	0.278005	-0.539203	-0.148623	-0.0827171	-0.255655	-0.462004	0.546099	0.692586	0.186296
579	-0.734536	-0.689273	-0.431986	0.142944	-0.34735	-0.568816	0.0682885	-0.28897	-0.322326	-0.36764
580	0.569223	0.792484	1.07866	-0.394973	0.493584	1.1844	0.665316	1.32601	1.23648	0.478797
581	0.292023	0.459469	0.450359	0.400957	0.542831	0.467675	0.589558	0.71437	0.719227	0.0842489
582	1.18482	0.799966	1.32147	1.33266	1.40769	1.30708	1.32363	0.725478	0.644484	1.08667
583	1.18882	1.2177	1.29244	1.32125	1.33649	1.27249	1.2006	0.844354	0.7527	1.01016
585	0.922282	0.381541	0.772654	0.908243	0.725027	0.811681	0.78519	0.365626	0.465292	1.02874
586	-0.953773	0.15334	-1.06854	-1.051	-0.578257	-1.03772	-1.07422	0.497779	0.902141	-1.68974
587	0.510738	1.37141	0.55932	0.511291	0.472514	0.538576	0.518273	0.879935	0.924301	0.680097
590	-1.27731	-1.23407	0.595129	1.41621	0.0786822	-1.58554	-0.340137	-0.0816072	-0.123224	-0.42466
593	1.00968	1.04506	0.965147	1.04275	0.894516	0.927918	1.06718	0.75329	0.784432	1.02072
594	0.606959	0.507759	0.406679	0.124039	0.41783	0.638301	0.404178	0.363745	0.303787	0.203123
595	1.1329	0.403404	1.15615	1.09644	1.08606	1.03487	1.2184	1.26312	1.4302	1.64312
596	-0.490582	-1.23014	-0.75378	-0.590633	-0.517422	-0.853679	-1.58319	-1.11645	-1.59086	-0.305534
597	-0.680991	-1.99082	-0.26901	-0.645711	-0.24629	-0.497434	-0.416396	-0.428735	0.275201	-1.16815
598	0.437995	0.663904	0.318075	0.692006	0.449836	0.584796	0.640179	0.755513	0.704821	-0.0215236
599	0.147998	0.202672	0.0311117	0.257865	0.437737	0.0972709	0.0176744	0.0611151	-0.250715	0.222103
602	-1.21039	-1.24801	-0.97358	-0.435259	-1.0697	-0.775868	-1.02918	0.539295	0.236449	-1.71953
604	1.19574	0.596297	0.825717	1.16209	0.648662	0.742038	0.963331	0.67785	1.02539	0.651851
605	0.228985	0.236218	0.320535	0.467406	0.39097	0.314777	0.103155	0.517266	0.529146	0.130038
606	-1.13297	-2.32762	-1.62435	-1.68413	-0.417651	-1.64507	-1.18065	-2.22312	-1.56103	-1.24947
607	0.884641	0.438515	0.806645	0.630502	0.995798	0.979313	0.769879	0.307181	0.139103	0.499724
608	-1.60602	-0.925055	-0.562678	-1.46178	-1.59277	-0.817576	-1.38126	-2.00242	-1.87638	-0.947139
610	0.213365	-0.233297	-0.0813188	-0.130237	0.33151	0.336945	0.101264	-0.652012	-1.35367	-0.111058
611	-1.04505	-0.611049	-1.04619	-1.06121	-0.564762	-1.21733	-1.16609	-1.50529	-1.11087	-0.626267
613	1.2723	1.84253	1.23912	1.23934	1.29746	1.34838	1.23475	0.731746	0.851084	1.0466
617	0.757477	0.856265	0.78014	0.863984	0.826629	0.842164	0.8058	0.922476	0.928102	0.706834
622	-1.51052	-0.813225	-1.69854	-0.97908	-0.879967	-1.45087	-1.66498	-1.87308	-1.82318	-1.78845
623	-0.233354	-1.02442	-0.650929	0.0954425	-0.0358228	-0.472981	-0.489676	0.699674	0.656302	-0.248329
624	-1.0238	-0.989033	-0.340485	-0.971788	-0.591125	-0.917744	-0.862384	1.31951	1.2501	-1.17946
627	0.301631	0.544291	-0.172196	-0.498556	-1.50549	-0.97204	-0.60307	0.109211	0.845165	1.4227
629	-0.41699	-0.414836	-0.943938	-0.175834	-0.888361	-0.981914	-0.183957	0.848852	0.728263	-0.9475
631	-1.40811	-1.53187	-1.08045	-0.369933	-1.23151	-1.61216	-1.39219	-0.27441	-0.598779	-1.8663
632	NA	NA	NA	NA	NA	NA	NA	NA	NA	NA
633	0.354022	0.567668	-0.106948	0.185848	-0.268447	0.327742	0.886744	0.390777	0.601631	0.252062
634	-0.453708	-0.543249	-0.630439	-0.432804	-0.431584	-0.410571	0.131247	-0.562633	-0.218129	-1.15282
635	-0.300523	0.29537	0.192434	-0.26065	-0.767401	-0.1727	-0.645749	-1.28652	-0.955713	-0.689724
636	-0.522026	-0.144543	-0.193921	-1.28756	0.0157925	-0.601481	-0.622938	0.152587	-0.121578	-0.24824
637	-0.730206	-0.24974	-1.18511	-0.720832	-1.13856	-1.38811	-0.252435	1.1235	1.02093	-1.51416
638	-0.353864	-0.0586691	-0.465582	-0.21576	-0.580914	0.19172	-0.705122	-0.045487	-0.976492	-1.93305
639	-0.791663	-0.70464	-0.707865	-0.735797	-0.573712	-0.216969	-1.40181	-0.417837	-0.683872	-1.16635
640	-1.38051	-1.84665	-1.58311	-1.61573	-1.45875	-1.76711	-1.48736	-1.78269	-1.71679	-1.71597
641	-0.309914	-0.0569301	0.0859966	-1.20633	0.287679	-0.291253	-0.336245	0.924775	0.83359	0.0857469
642	0.424266	1.00834	0.332541	0.418723	0.674329	0.591061	0.215697	1.02998	1.0102	0.457679
643	-0.694489	-1.72495	-0.639544	-1.82367	-0.909135	-1.08577	-0.601414	-1.32093	-1.13672	-1.62056
644	0.539801	0.421054	0.46062	0.543201	0.510865	0.602354	0.483549	0.713802	0.591321	0.0184021
645	0.613832	0.794644	0.632347	0.623966	0.52083	0.548141	0.689589	0.75361	0.606921	-0.36187
646	-2.01997	-2.93422	-1.79046	-2.1446	-2.05219	-2.45765	-2.13738	0.763583	0.524198	-1.99522
648	1.5594	1.7178	1.60335	1.65117	1.56959	1.52436	1.72305	1.30058	0.993325	1.5218
649	-0.864277	-0.493281	-0.562975	-0.407917	-0.353404	-0.713571	0.0165983	-0.424976	-0.556397	-0.201505
650	-1.08818	-0.388938	-1.24825	-1.71856	0.139334	-0.537669	-0.256399	-0.722917	-1.13402	-1.79994
651	-1.03378	-0.355481	-0.463495	-0.571844	-0.323622	0.0493726	-0.0398701	-1.50763	-1.14585	-0.435051
652	-1.82824	-1.79578	0.18961	-1.4692	-1.50776	0.749013	-0.637419	-1.77816	-1.56167	-2.00012
653	1.00014	-0.350886	-0.236526	-0.496968	-1.56947	-1.57961	-1.62114	-1.1295	-0.534254	-1.5875
654	-0.537835	-0.0491608	-0.540689	0.233858	-1.06745	-0.440553	0.213079	-0.83441	-1.1798	0.234201
655	-0.822906	-0.25928	-0.0243631	-0.082877	-0.715282	-0.33283	0.167479	-1.22328	-0.823041	-1.13467
656	-1.19601	-0.99278	-0.623082	-1.3204	-0.976291	-0.597293	-1.0906	-1.70707	-1.22743	-0.550448
657	0.93565	0.660881	0.886002	1.00481	0.993773	0.857494	0.928659	0.840956	0.617595	0.731453
658	-0.875915	-1.1951	-0.94744	-1.10851	-0.861224	-1.28233	-0.916993	-1.17679	-1.10719	-0.831786
659	0.622171	0.125777	0.432498	0.384907	0.737224	0.472339	0.585285	0.602952	0.728623	-0.0797733
660	-1.55868	-0.564959	-0.961411	-1.31138	-0.804072	-1.2182	-0.433277	-1.57732	-0.987394	-1.21561
661	0.358733	1.1384	0.335105	0.325538	0.446856	0.215937	0.224532	0.457185	0.586375	0.719567
662	0.399036	0.435724	0.324873	0.434176	0.0365318	0.345603	0.447407	0.38088	0.340748	0.324114
663	0.76074	0.543012	0.814975	0.742912	0.811732	0.664073	0.798538	0.950008	0.747981	0.864247
664	0.945339	0.840446	1.13742	1.03655	1.06208	1.07955	1.16639	1.59785	1.89673	0.926148
665	1.64966	1.55571	1.6012	1.68256	1.63551	1.61435	1.63965	1.71868	1.75455	1.70265
666	-0.964771	-1.50537	-0.967107	-1.20176	-0.955877	-0.955233	-0.872854	-1.40535	-1.3478	-1.12302
667	-1.27998	-1.02174	-0.559601	-1.85079	-0.754808	-2.37472	-0.810683	-0.621795	-0.409963	-0.981419
668	1.12883	0.811323	-0.273689	0.859683	-0.54965	0.27478	0.131556	-0.0838388	-0.271436	1.59565
669	0.593992	0.773671	0.689795	0.631461	0.578051	0.522904	0.609797	0.272611	0.166917	0.797977
670	0.450804	0.282899	0.310935	0.261624	0.507547	0.509496	0.655566	0.323511	0.331108	0.247646
671	-1.03045	-1.54572	-0.883922	-1.07209	-1.16229	-1.37844	-0.765436	-1.55351	-1.15413	-1.38373
672	-0.494643	0.176573	-0.229614	-1.14393	0.0520527	-1.27431	-0.213436	1.10648	0.941646	-0.27521
673	0.0395684	-0.0942537	-0.25021	0.088338	-0.106712	0.0459074	0.0346278	-0.111369	0.201178	0.0236533
675	-0.510329	-0.454447	-0.473268	-1.58706	-1.37266	-0.495814	-1.35864	0.350516	0.287337	-1.54537
676	-1.0698	-1.10146	-1.56542	-0.59369	-1.90802	-2.09065	-1.40093	-2.41263	-1.77387	-0.705554
677	0.274257	0.413079	0.169627	0.672722	-0.288868	0.186176	0.764622	1.78323	1.71996	-0.0652643
678	-0.129346	-0.450606	-0.318796	-0.0705162	-1.62335	-0.13057	-0.201321	0.528524	0.316737	-0.876953
680	-1.86751	-1.95543	-0.339096	-1.75905	-0.957331	-0.240866	-1.35578	-2.22965	-1.38684	-1.85439
682	1.78582	1.65194	1.69297	1.29532	1.56405	1.76956	1.71477	1.73693	1.89838	1.62687
683	-1.30363	-0.758958	-0.341989	-0.174571	-0.112829	-0.239128	0.00785397	0.190486	0.132426	-1.80097
684	0.371594	0.39101	0.030995	0.315352	-0.44539	0.301372	0.799933	0.22128	0.302365	0.163782
685	0.22646	-0.615807	0.0289403	0.0213607	0.0677325	-0.120177	-0.240685	-1.7015	-1.70675	-0.94173
686	0.799135	0.402003	0.941246	0.692558	0.718469	0.667372	1.03453	0.312702	0.583024	0.700317
687	-0.388974	-0.744883	-0.800818	-0.933017	-0.702384	-1.56301	-0.735891	-0.322298	-0.22305	-0.764667
688	-0.479857	0.0871708	-0.189617	0.109229	-0.117144	-0.0616678	-0.190308	0.0354057	0.195138	0.546715
689	2.20807	2.38209	2.25549	2.25373	2.229	2.14107	2.24759	2.43804	2.4862	1.95654
690	-0.870993	-0.974035	-0.630149	-0.897134	-1.32238	-0.948769	-0.980327	-0.418364	-0.538989	-1.46911
694	-0.684992	-0.399088	-1.04353	-0.513811	-0.879202	-1.41086	-0.587561	-1.73653	-0.984258	-0.765618
695	-0.732733	-0.884031	-0.969728	-0.807925	-0.725236	-0.138873	-0.76948	-1.05723	-1.17258	-1.79466
696	-0.784853	-0.653328	-0.461104	-0.535401	0.00728109	-0.752095	-0.0625972	-0.734556	-0.425012	-0.518214
699	-0.463884	-0.116729	-1.08994	-0.542573	-1.47008	-1.55872	-0.649493	1.54205	1.42306	-1.67689
701	0.358395	0.186784	0.267149	0.164868	0.426995	-0.0707539	0.22628	1.85131	1.73588	0.268619
705	-0.0609811	0.243485	0.343792	-0.510879	0.115742	0.303038	0.17111	0.94371	0.980444	-0.171742
706	0.241066	0.733754	0.675245	0.545697	0.410054	0.708278	0.752713	1.63866	1.55712	-0.0285909
708	1.34132	1.88471	1.34902	1.51533	1.21071	1.31341	1.40252	1.8064	1.73745	1.44923
710	0.41427	0.413359	0.612517	0.672169	-0.00127962	1.01711	0.900576	0.703057	0.545307	0.163951
711	0.2762	-0.0593154	0.130219	-0.0662072	0.243418	-0.0600963	0.190978	-0.140507	-0.273085	0.610692
712	1.15921	1.12498	1.04646	0.822779	0.885588	1.21915	1.28935	-1.27769	-1.51841	0.558708
713	1.02587	0.823128	0.569518	0.581263	0.226082	0.878811	0.997358	-0.502193	-0.517811	0.16195
714	1.25124	1.22722	1.0065	0.835348	0.531221	1.18353	1.18376	-1.23085	-0.750413	0.737075
715	0.397192	0.388669	0.447456	0.150872	0.457146	0.540173	0.841997	1.60345	1.46896	-0.205009
716	-1.30866	-0.553412	-1.17392	-1.02392	-0.892415	-1.5226	-0.285793	0.99625	0.999658	-0.900758
717	-0.274786	-0.566279	-0.351464	-0.736346	-1.02389	-0.33678	-0.582698	-0.74416	-0.586529	-0.581155
718	1.45455	0.605604	1.2492	1.46511	-1.02112	1.12154	1.58941	1.85576	1.53896	0.0764075
719	0.399743	-0.0876024	0.433744	0.0246689	0.0643368	0.384066	0.841746	-0.36156	-0.227544	-0.256628
720	NA	NA	NA	NA	NA	NA	NA	NA	NA	NA
721	NA	NA	NA	NA	NA	NA	NA	NA	NA	NA
722	-0.257803	-1.44038	-0.959361	-0.8398	-0.765294	-1.14837	-0.725589	-1.21748	-1.11626	-1.17967
725	-1.12459	-0.989606	-1.08183	-1.13041	-0.681822	-0.943046	-0.937063	-1.20522	-1.02413	-1.39237
726	-0.159682	-0.24142	-0.450281	-0.341797	-1.3293	-0.531259	-0.357981	0.133878	0.312934	-1.69784
727	0.451572	0.319958	0.594051	0.425337	0.373146	0.178732	0.524591	0.519082	0.302997	0.349533
728	0.563839	1.01222	0.44712	0.325924	0.395903	0.249955	0.549677	-0.567865	-1.64906	0.61053
729	-0.969224	-1.33653	-0.761861	-0.824671	-0.633357	-0.696284	-0.632446	-0.699779	-0.383521	-0.31427
730	0.124121	-0.242124	-0.289153	-0.118235	1.85025	0.606484	0.351565	-1.11907	-0.920899	-0.332534
731	-0.691937	-1.24646	-1.56934	-1.2768	-1.1409	-0.655249	-1.10891	-1.15068	-1.10144	-0.663582
732	0.14833	-0.621778	-0.850679	-1.23846	-0.13407	-1.00125	-0.0563766	-1.03961	-0.124965	-0.617908
733	-0.660967	-2.12814	-1.4923	-1.67952	-1.10562	-0.783477	-1.81694	-1.55672	-1.22225	-0.501186
734	0.765973	1.19923	0.587694	0.859349	0.903531	0.754461	0.646091	0.818156	0.814552	1.14009
735	-1.94206	-1.89449	-2.2477	-1.91259	-2.24395	-1.63734	-1.43034	-2.39278	-2.30327	-2.2119
738	1.54074	1.41472	1.62227	1.57165	1.2937	1.62841	1.50591	1.41831	1.50656	1.48718
740	1.79536	1.40358	1.87841	1.81724	1.76013	1.82819	1.90375	1.77408	1.73607	1.49562
741	0.429444	0.237761	0.505125	0.459414	0.606618	0.410929	0.409016	0.0959281	0.130895	0.153775
744	0.778872	0.981741	0.901277	0.714133	0.900618	1.27712	1.13557	-2.29378	-0.994598	1.57961
745	-1.00396	-1.10442	-0.163026	-1.16668	-1.0527	-1.15859	-1.03747	0.364214	0.507759	-1.03789
746	2.16411	1.98902	1.99908	2.04975	1.90324	2.01413	1.99283	2.10753	2.08527	2.23792
747	-0.397297	-0.869875	-0.721787	0.214693	-0.671421	-0.743806	-1.07996	0.112282	-0.117956	-0.204593
750	-1.05466	-0.497701	-0.862324	-0.317398	-0.769912	-0.289793	-1.10123	-1.20133	-0.396865	-1.4956
752	-0.21542	-0.24843	-1.16459	-0.221534	-0.0418719	-0.0989238	0.043739	-0.415136	-0.672232	-0.766288
753	0.393695	0.525436	0.294316	0.58918	0.557268	0.30747	0.358211	-0.879084	-1.41399	1.0192
754	1.80871	1.92108	1.80128	1.62718	1.52709	1.88808	1.79717	2.1646	2.24255	1.81528
755	-1.20473	-1.36656	-1.07541	-1.39194	-1.0029	-1.311	-1.27739	-1.69084	-1.12111	-1.91961
757	1.54039	1.20878	1.43643	1.47188	1.39361	1.45532	1.66043	1.04654	1.13543	1.5732
758	0.0312913	-0.209556	0.140491	-0.0188783	0.181682	0.158652	-0.107129	-0.279321	-0.318429	-0.310339
759	-0.277118	-0.74128	-0.231097	-0.439405	-0.894498	-0.194921	-0.354472	-0.989055	-0.465688	-0.316207
760	-1.09271	-0.247607	-1.0744	-0.679957	-1.57073	-0.49717	-0.453663	-2.022	-1.43294	-1.07287
761	-1.12729	-0.804551	-0.532925	-1.1106	-0.337852	-0.51338	-0.826703	-1.79999	-2.09071	-0.70713
762	-0.615586	0.356494	0.266912	0.0168321	0.0569567	0.0626989	-0.191134	-0.497336	-0.728926	-0.146365
763	-0.139784	-0.400943	-0.288313	-0.088258	-0.00606347	-0.513033	-0.00722441	-0.494625	-1.31723	-1.45194
765	-1.91493	-2.08198	-1.1275	-1.91528	-0.476073	-1.52158	-0.84859	-1.07649	-1.92176	-1.7232
766	-0.103197	-0.885009	-0.268899	-0.232079	-0.74332	-0.326979	-0.718826	-1.02198	-0.127835	-0.975939
767	-1.5426	-1.47887	-0.475653	-1.40891	-1.09988	-1.64315	-1.20078	-1.47411	-1.37466	-1.78489
768	-0.0952409	-0.240386	0.0992458	0.105431	0.0669998	0.0113477	-0.0021136	-0.206343	0.332135	0.18024
770	1.68954	1.30529	1.43242	1.4768	1.30834	1.40171	1.36242	0.621317	0.510357	0.944315
771	1.6737	0.41937	0.679065	0.28008	0.450233	0.865865	1.13489	0.623741	0.827478	-0.0358779
773	-0.507467	-0.995383	-0.586268	-0.21797	-1.09238	-0.652085	-0.473322	-0.470982	-0.190018	-0.393257
774	-1.07736	-1.04801	-0.932692	-1.30946	-1.20945	-1.12104	-1.23368	-1.42568	-1.52373	0.021267
775	0.0590446	0.121491	0.34232	-0.162474	0.352737	0.047425	0.181074	-0.579179	-0.416203	-0.0683815
776	0.484261	0.42885	0.494517	0.439544	0.59612	0.554178	0.505808	-1.54499	-0.438381	0.906106
777	-1.15697	-1.33739	-1.44937	-1.18466	-1.42735	-1.4482	-0.921159	-1.6563	-1.53322	-1.33115
778	-1.19161	-1.70786	-0.189242	-0.902175	-0.807468	-0.977595	-0.948648	-1.62976	-0.994836	-1.52794
779	-1.08308	-0.140947	-0.744715	-0.430059	-0.490588	-0.774994	0.187146	-0.252118	-0.67312	-0.105916
780	1.66534	1.61103	1.5883	1.63027	1.73596	1.73157	1.75401	1.20922	1.24624	1.31123
781	0.564023	0.0754007	0.228887	0.332839	0.869607	0.767558	0.56959	-0.254755	-0.065573	-0.00698957
782	0.116875	-0.263492	-0.128345	-0.35259	0.325515	0.130329	0.377091	-0.119594	0.0948566	-0.404174
783	0.256848	0.373366	0.299913	0.372284	0.385895	0.34984	0.260512	-1.54735	-0.2233	-0.0124853
784	-0.253307	0.180153	0.476699	0.951535	0.901989	0.629669	0.455514	0.691915	0.929363	-0.734113
785	-0.874842	-0.992703	-1.02445	-0.540591	-0.451294	-0.741235	-0.624767	-1.55796	-1.00696	-0.0725121
786	-0.993468	-1.10891	-0.455219	-0.784527	-0.280629	-0.728635	-0.70163	-0.973653	-1.18091	-0.476651
788	0.836313	0.833283	0.764519	0.813006	0.834161	0.854595	0.61979	0.614329	0.523136	0.938761
790	-0.550092	-0.445248	-0.848837	-0.913859	-0.235836	-1.12583	-0.888874	-0.841755	-0.911553	-0.349493
793	-0.457677	-0.676669	-0.489022	1.80463	-1.24012	-1.43128	-0.155733	-1.00904	-0.864413	0.61031
794	0.257746	-0.145634	0.0804565	0.433744	0.947965	0.571625	0.767499	-0.0111462	0.0778573	-0.142561
795	-1.26551	-1.33085	-0.855809	-1.23158	-0.946438	-1.05454	-1.08005	-1.49514	-1.25016	-1.48588
796	-0.088603	-0.266837	-0.0177032	0.0134763	-0.48122	-0.147928	-0.129235	-0.694966	-0.879917	-0.476559
797	-0.0378683	-0.12929	-0.186927	-1.53006	-0.769839	-0.776047	-0.456347	-0.724308	-0.636489	-0.308132
799	-1.9009	-1.84569	-1.79961	-1.90933	-1.61936	-1.68908	-1.29363	-2.33563	-1.97188	-1.23402
800	0.342577	0.589106	0.0492067	0.25094	0.0473897	0.0359782	0.611271	0.729097	0.794035	0.217069
801	2.37191	2.22769	2.44338	2.42549	2.38715	2.4199	2.39288	1.84933	1.81826	2.22558
805	2.83347	2.71206	2.84712	2.75541	2.84913	2.74813	2.84498	2.61954	2.69855	2.70435
808	0.391885	0.0260119	0.365921	0.17377	0.300244	0.257398	0.337613	0.293348	0.220685	0.178911
810	-0.762907	-0.395969	-0.78057	-0.314187	0.0962398	-0.213094	-1.18374	-0.405995	-0.190331	-1.3851
811	1.18551	0.883287	1.04917	0.936183	1.07184	1.04298	0.938881	1.36171	1.46062	1.239
813	0.457507	1.25671	0.449772	0.38727	0.329493	0.491501	0.696431	1.9179	2.0631	1.56514
814	0.36875	-0.133401	-0.989511	-0.0335018	-0.748274	-0.347317	-0.392545	-0.061071	-0.244731	-0.261422
815	-1.30621	-1.18544	-0.757904	-0.523983	-1.03938	-1.26197	-0.191551	-1.79408	-1.15358	-1.65129
816	0.923568	0.204004	0.915113	0.881441	0.935464	0.933741	0.763918	-1.36407	-0.548347	0.931828
817	0.705281	0.334684	0.93115	0.522257	0.799531	0.987863	0.96997	0.641336	0.695725	0.851769
818	0.867603	0.440963	0.919851	0.907744	0.912687	0.873667	0.967514	0.646178	0.664927	0.45896
819	1.80281	1.77799	1.68078	1.77442	1.5692	1.68836	1.64222	1.59081	1.52842	1.50382
820	-1.02689	-1.41469	-0.993355	-1.08172	-0.813458	-1.15927	-0.977239	-1.25368	-1.23124	-1.15979
821	2.19482	2.22637	2.1252	2.22586	2.12094	2.12665	2.16779	2.1755	2.25293	2.20057
822	0.447479	-0.026615	0.173801	0.211731	-0.910653	-0.230649	0.306184	1.42851	1.45005	-0.119294
823	0.940732	0.618961	1.08272	0.973508	1.11564	1.00836	1.13578	0.768775	0.941656	0.255144
824	2.16905	1.70392	2.05617	2.06156	2.02795	1.99487	1.94441	2.38887	2.41739	1.60083
825	-0.80698	-0.64216	-0.243937	-0.000404972	0.174539	-0.125303	-0.215441	-0.213284	-0.142714	0.114385
826	2.33251	2.09613	2.23422	2.25719	2.29785	2.25414	2.27486	2.0765	2.09272	1.96265
827	-1.35821	-0.76859	-0.716878	-1.0545	-0.320215	-1.35348	-0.504696	-1.52557	-2.09356	-2.16323
828	0.291308	0.161759	0.425096	0.398977	0.395426	0.149778	0.0512782	-0.792211	-0.22836	0.362707
829	1.69536	1.3058	1.71552	1.60029	1.56232	1.62443	1.65342	1.94209	1.84151	1.47592
830	-1.16964	-1.13855	-0.829073	-1.16988	-1.32779	-0.661707	-1.68395	-0.808173	-0.976373	-1.81336
831	0.185558	-0.213855	0.363158	0.0092395	0.280239	0.0537706	0.420726	-0.102185	-0.257262	0.0313423
832	1.29446	1.10623	1.36736	1.32909	1.2561	1.35538	1.40262	1.48621	1.44866	1.20907
833	-1.28136	-1.15007	-1.24643	-1.54384	-0.95832	-1.18138	-1.00793	-1.34426	-1.50483	-1.3976
834	-0.318835	-0.235798	-1.00236	-0.449333	-0.247698	-0.096122	-0.112174	0.152076	0.296603	-1.68846
835	-0.281495	-0.436526	-0.866585	-0.368805	-0.00800433	-0.371493	-0.266624	0.111296	0.201519	-0.991988
836	0.271327	-0.24323	0.344138	0.291611	0.0674519	0.212461	0.167067	1.13921	1.0158	0.0895214
837	-0.509138	-1.15942	0.142987	-0.360061	0.363577	-0.204727	0.0833619	0.54236	0.674204	-0.440077
838	-0.790176	-0.648944	-0.706595	-1.48915	-1.14219	-1.04483	-1.16602	-1.42558	-0.797294	-0.764899
839	0.197262	-0.0625875	0.35873	0.602965	0.318065	0.306332	0.311297	1.13405	1.09976	-0.119485
840	0.211246	0.16588	0.300491	0.354803	0.148484	0.0939537	0.270036	0.87481	0.732334	-0.118296
841	-1.09661	-1.33238	-0.401624	-1.4144	-0.206358	-0.420918	-0.379866	-1.29993	-0.317436	0.0451217
842	0.828816	0.761865	0.913301	0.814296	0.979508	0.906157	0.869438	0.533689	0.510587	0.597521
843	-0.290319	-0.428562	-0.738055	-0.560764	0.161041	0.0485085	-0.405474	-0.269761	-0.485858	-0.310792
844	-0.422638	-0.909	-0.18239	-0.0856449	0.169593	0.0133673	-0.108034	-0.975027	-0.883426	-0.416886
845	-1.29529	-1.69665	-1.14027	-0.817502	-1.37859	-1.06411	-0.714043	-1.4078	-1.51333	-1.20133
846	-0.529624	-0.415346	0.363845	-0.106139	-0.070727	-0.0907358	0.232948	-1.13933	-0.651477	-0.988374
847	0.254664	0.412522	0.405847	0.617077	0.272546	0.255345	0.772853	1.51902	1.53071	0.967642
856	-2.21684	-1.95526	-2.07492	-1.7571	-2.12474	-1.78167	-1.73127	-2.21715	-2.25092	-2.4545
857	-0.766176	-0.251553	-0.807463	-0.526879	-0.368813	-0.583103	-0.180537	1.45018	1.31844	-1.51131
858	-0.21506	0.135933	-0.384302	-0.250601	-0.582825	-0.41156	0.352893	0.983373	0.923811	-0.10469
859	-0.416223	-0.478758	-0.824139	-0.642419	-0.669784	-0.67735	-0.0264101	-1.2967	-1.39421	-0.503756
860	-1.38422	-0.471989	-0.13849	-0.892127	-1.06019	-0.814479	-0.752199	-0.278325	0.0983294	-0.420158
861	-0.65249	-0.50127	-0.816929	-0.252883	-1.05837	-0.759175	-0.270842	-0.327248	0.237612	-0.413042
862	-0.459492	-0.261465	-0.370491	-1.38316	-0.282292	-0.64613	-0.38428	-0.636041	-0.597436	-0.214319
863	0.54137	-0.349388	0.299737	0.614747	0.516013	0.34134	0.263942	-1.02967	-0.846316	-0.458997
864	-0.528488	0.00891618	-0.216716	-0.169554	0.0166827	-0.103799	-0.204472	-0.492947	0.0317495	-0.26746
865	1.28569	1.99304	1.16085	1.43781	1.13153	1.23972	1.20124	1.9493	1.98145	1.86045
866	-1.07783	-1.17824	-1.42974	-1.47403	-1.47057	-1.79752	-0.727352	-1.80751	-1.30405	-1.32217
867	-0.557555	-0.416964	-0.202706	-1.0494	-0.0271283	-0.221806	-0.285803	0.0940556	0.256651	-1.33501
868	-1.63139	-2.11658	-1.78297	-2.06229	-2.14726	-1.88685	-0.865449	-1.90033	-2.13204	-0.859244
869	-1.91044	0.316158	-1.05322	-1.15435	-1.11712	-1.29254	-0.573799	-1.78858	-0.359241	-0.193278
871	-1.23443	0.213284	-0.796674	-0.876855	-0.982456	-1.24009	-0.529612	2.19655	2.24293	-0.254609
873	0.524667	1.4139	0.400835	0.606657	0.489842	0.497882	0.67068	1.03831	1.05583	0.478858
874	-0.944225	-0.520735	-1.03684	-0.214559	-0.314823	-1.01132	0.185557	1.08654	1.03089	-1.63218
875	0.369279	0.540159	0.147232	0.0667172	-0.0625801	0.32179	0.155936	0.800524	0.896459	-0.256746
881	-1.67954	-1.74431	-1.56265	-1.02731	-1.42005	-1.38218	-0.973597	-1.681	-1.58987	-1.75627
883	-1.64681	-1.50037	-1.40176	-1.49109	-1.46585	-0.733114	-0.775265	-2.01777	-1.65534	-1.53896
885	-1.50412	-1.63944	-1.65148	-1.5046	-1.60153	-1.65465	-1.56156	-1.60115	-1.26194	-1.89607
886	-0.874809	-0.598712	0.0697177	-0.988053	-0.918674	-0.626356	-0.831633	-1.04204	-1.41205	-1.10802
887	-0.240474	-0.761177	-0.238454	-0.508268	-0.479568	-0.982461	-0.217587	-1.29409	-1.25557	-0.864115
889	0.680139	0.521959	0.886002	0.795898	0.975565	0.582865	0.968851	0.514666	0.215275	0.568013
890	-0.150623	-0.0850936	-0.0686522	-0.372635	-0.724587	-1.28476	-0.116234	1.64883	1.57165	-0.366032
891	0.363123	0.297151	0.151588	0.376871	0.256922	0.204742	0.334059	2.07844	2.02119	0.021817
892	-0.712846	-1.95698	-0.54419	-1.47754	-0.929778	-0.889789	-1.46469	-1.0092	-1.97886	-0.215108
894	0.866169	-0.46197	0.760558	0.609561	0.999705	0.710346	0.927834	0.376254	0.118718	-0.110253
896	-0.318243	-0.569948	-0.156464	-0.366969	-0.249242	-0.271024	0.0102582	-0.407893	-0.0975269	-0.332649
898	0.0185548	-0.237172	0.0656289	0.225161	0.352099	0.10646	-0.908353	0.492756	0.513861	-0.146642
899	-0.145722	-0.0391886	0.0364743	0.105558	0.145216	0.192182	0.249402	1.19086	1.16163	-0.263308
900	1.74357	1.93231	1.61699	1.7953	1.80051	1.50936	1.75811	1.96796	1.88501	1.20879
901	-0.249799	-0.59009	-0.476495	-0.48029	-0.163183	-0.209343	-0.211509	-0.440446	-0.136705	-0.338657
902	1.46152	1.4638	1.53328	1.48651	1.38856	1.50434	1.58523	1.32373	1.33473	1.29424
904	0.96811	0.861255	0.851534	0.818657	0.882337	0.684726	0.80353	0.660874	0.701453	0.725852
905	0.576214	0.736468	0.606364	0.579225	0.501495	0.822381	0.413283	0.538284	0.531827	0.725943
908	1.31581	1.58655	1.18874	1.28492	1.09684	1.3047	1.1437	1.47508	1.58026	1.50166
909	-0.0396524	-0.75204	-0.0498534	0.0483216	0.318963	0.106479	0.0647006	-0.436536	-0.523454	-0.138738
910	-1.76974	-1.86514	-1.48613	-1.70156	-1.15336	-1.77918	-1.22052	-1.70352	-1.28332	-1.69357
911	-0.976531	-1.07908	-0.0955915	-1.13421	-0.403543	-0.800224	-1.16203	-0.62772	-0.874856	-1.49185
912	-1.23188	-1.93835	-1.56924	-1.82746	-0.815687	-1.46234	-1.09541	-1.40056	-1.63484	-1.62145
913	-1.06933	-1.06396	-0.982389	-1.2123	-0.919058	-0.846153	-0.937727	-1.51518	-1.29399	-1.33101
914	-0.468357	-0.235069	-0.269066	-0.62681	-0.117051	-0.236093	0.0952678	-0.485196	-0.728541	-0.287476
915	-0.230712	-0.950742	-0.78569	0.152322	-0.570752	-0.361654	0.0762181	-0.334535	-0.5176	-0.530428
916	-0.764664	-0.321506	-0.853493	-0.86457	-0.852093	-0.698229	-0.0561374	-1.49879	-1.08611	-1.05288
917	-1.18172	-1.20609	-0.763951	-0.417563	-0.207801	-1.24301	-1.26205	-1.43977	-1.27686	-1.27673
919	-0.580376	-1.04717	-0.924167	-0.928407	-0.938733	-0.821425	-0.842521	-0.819132	-0.997188	-1.07887
920	0.0116829	0.35212	-0.520983	-0.0705244	-0.907536	-0.165099	0.0192722	-0.158403	-0.575386	-0.943687
921	-0.411311	0.221614	0.374665	-0.0890078	0.162548	0.315413	0.316488	-0.455337	0.109433	-0.846192
922	-0.326609	-0.841108	-0.275277	-0.492088	-0.111214	-0.96253	-0.260541	-0.681919	-1.02733	-0.531246
923	-1.44025	-1.78522	-1.55835	-1.16926	-1.188	-1.56606	-1.39419	-1.69537	-1.43543	-1.71626
924	-0.824638	-0.404509	-0.0996825	-0.0508058	-0.0462496	-0.832022	-0.776098	-0.850616	-0.354025	-0.38136
925	-0.634864	-0.917956	0.115869	-0.641695	-0.644316	-0.091535	0.384133	-0.851003	-0.976385	-0.280453
926	-0.125143	-1.83501	-0.825245	-0.882815	-0.962723	0.262252	-1.08159	-1.82866	-0.975552	-0.699898
928	1.90688	1.92139	1.79747	1.5527	1.20018	1.74178	1.65537	1.87973	2.0986	0.600248
929	0.715041	0.554745	0.709027	0.562476	-0.385062	0.646921	0.9495	0.0512146	0.306289	0.854643
930	-0.368761	-1.13748	-0.560386	-0.790262	-0.985132	-0.937604	-1.16319	-1.80592	-0.803051	-2.13354
931	-0.454871	-0.337769	-0.0985088	-0.376124	-0.237711	-0.0613921	-0.00369121	-0.794918	-0.34984	-0.190365
932	-0.975412	-1.04003	-0.461471	-0.68915	-0.34869	-0.960944	-0.363079	-0.772518	-1.16519	-1.11528
933	-1.02087	-1.05568	-0.0140888	-0.873187	-1.0024	-0.12664	-0.625274	-0.4498	-0.522628	-1.2927
939	0.0262418	-0.119674	-0.263245	-0.119998	-0.00834563	0.115509	0.042422	-0.226945	-0.0181829	-0.231563
940	-0.602537	-1.02555	-0.625206	-0.771741	-0.66136	-0.35278	-1.59159	-0.720569	-0.363753	-0.637947
941	-0.961229	-0.399914	-0.128465	-0.350406	-0.00507044	-0.0790305	-0.374031	-0.915015	-0.409776	-1.21753
942	-0.0596874	-0.0683005	0.090653	-0.123402	0.0629354	0.20659	0.310201	-0.0966279	-0.242486	-0.200642
943	-0.132958	-0.369944	0.182323	-0.0605386	0.0082585	0.0731376	0.0830687	-0.0223272	-0.174793	-0.128832
944	-0.986801	-0.380563	-0.466084	-0.469384	-0.799864	-0.981502	-0.309279	-1.43573	-0.27915	-1.50307
945	-1.28486	-1.18582	-0.67418	-1.45175	-1.10535	-1.33561	-0.556471	-1.78875	-1.62295	-1.4072
946	-1.82263	-1.2205	-1.18026	-1.52287	-1.55213	-1.69158	-1.09426	-1.28888	-1.86346	-2.54881
947	0.0741986	0.317704	0.165189	0.347555	0.476814	0.189199	0.609411	0.0804339	0.0907249	-0.0134927
948	-0.350726	-0.292069	-0.168156	-0.541997	-0.0729817	-0.415614	-0.725739	-1.49888	-0.734827	-0.252326
949	0.695208	0.475604	0.586015	0.903755	0.723482	0.877448	0.735751	0.992348	1.03631	0.643373
950	1.51407	0.929731	1.39455	1.4245	1.5285	1.62412	1.49583	1.66718	1.80129	1.00952
951	-0.195893	-1.45923	-0.34573	-0.828263	-1.40789	-0.454962	-0.254937	-0.912027	-0.564976	-1.98795
952	-0.498928	0.00495825	-1.07188	-1.5812	-0.993478	-0.324009	-0.267086	-0.651637	-0.883754	-0.153565
953	0.172653	0.0646272	0.124163	-0.240106	-0.168718	0.0392816	0.236582	-0.665439	-0.524062	-0.0755314
954	-1.38251	-1.22718	-1.27793	-1.28824	-1.31333	-1.28844	-1.25193	-1.39182	-1.62723	-1.72659
955	1.33078	1.21627	1.30755	1.23719	1.35215	1.31196	1.21146	0.69687	0.747878	1.36587
956	-0.853794	-0.723159	-0.743711	-0.21282	-1.29598	-1.66301	-0.56723	-1.35	-2.12912	-0.657149
957	-0.0369663	-1.53182	-0.832083	-1.0707	-0.721456	-1.13665	-1.24206	-0.415533	-0.703956	-1.62196
958	-1.12845	-1.24337	0.578385	0.0331304	-0.323629	-0.404762	-0.0851183	-1.18646	-1.12673	-1.26567
959	-0.895299	-1.33041	-1.0405	-1.43694	-0.871388	-0.905747	-0.786279	-1.52972	-1.27568	-1.16949
960	-1.35566	-1.37822	-1.13112	-1.60331	-1.5544	-1.22871	-0.94746	1.35034	1.66085	-0.10202
961	1.77067	1.59562	1.36922	1.62924	1.57103	1.5107	1.57352	1.83885	1.84768	1.91208
962	-0.254141	-0.319398	0.010807	-0.10997	-0.0106378	-0.103653	0.128345	-0.499687	-0.0289619	-0.0123162
963	0.8405	0.745185	0.735095	0.49475	0.503383	0.622695	0.979975	-0.402952	-0.486358	0.260008
965	0.0994393	0.743028	-0.334278	-0.297525	-0.0140273	-0.354931	0.444765	0.796364	0.779807	0.38554
966	2.27163	2.02216	2.16097	2.21994	2.08863	2.20313	2.23085	2.05719	2.22972	2.23172
967	2.36181	2.50847	2.21483	2.28931	2.09579	2.2369	2.20171	2.47645	2.52674	2.51001
968	-0.908512	-0.63693	-1.45197	-0.922143	-1.34775	-0.597702	-0.453927	-1.03943	-0.179172	-1.34394
969	-0.410731	-0.46041	-0.62658	-0.78511	-1.5925	-0.913378	-0.726294	-1.18703	-1.13881	-1.02836
970	-0.377814	-0.523991	0.0501795	0.166103	0.120895	-0.496022	0.314568	0.54832	0.476912	-0.349157
971	-1.02776	-0.612604	-0.887531	-1.25438	-1.52985	-1.42977	-1.1042	-1.07505	-1.29388	-0.820776
972	-0.523895	-1.63403	-0.448711	-0.689516	-0.635957	-0.608772	-1.39356	-1.28249	-0.702457	-0.879679
973	-0.0587554	0.0313218	0.242337	-0.0765046	-0.355578	0.205748	0.286144	0.167931	0.408472	0.218956
974	-0.213951	-0.204394	0.00708269	-0.182796	-0.315988	-0.847053	0.132749	-0.236359	-0.905123	-0.210835
975	2.24654	1.86749	2.07256	2.08729	1.89895	2.03752	2.16142	2.19643	2.17283	2.34837
976	-0.311476	-0.0870836	-0.13007	-0.0194865	-0.206298	-0.0167312	0.0772585	0.687427	0.742155	-0.57765
977	1.13956	0.861191	0.940947	0.586778	0.760696	0.932691	0.887464	1.52598	1.60515	1.00977
978	-1.70589	-2.0872	-1.85477	-1.54435	-1.57484	-1.72446	-1.37069	-1.96837	-1.23382	-2.13323
983	0.446866	1.32477	0.629854	0.319413	0.606311	0.227637	0.277251	2.05569	1.87391	0.820408
984	NA	NA	NA	NA	NA	NA	NA	NA	NA	NA
987	1.46543	1.25048	1.46667	1.36958	1.41328	1.42038	1.36535	1.12477	0.925125	1.52516
988	0.892144	0.962832	0.860608	1.10345	0.990365	1.14796	0.934253	1.44413	1.371	0.391329
989	-0.0743085	-0.341176	0.150953	-0.0547587	-0.0418408	-0.161978	-0.180088	0.0287404	-0.268737	-0.133066
990	-0.617316	-0.230916	-0.611139	-0.866896	-0.241274	-0.586836	-0.617721	1.35983	1.25456	-0.265001
991	-0.403636	-0.265203	-1.42903	-0.26112	-1.1888	-1.37191	-0.18657	1.92735	1.91502	-0.273514
993	-0.0262162	-0.87188	-0.740804	0.278616	-0.0342833	-0.351681	-0.125243	0.72511	0.633639	-0.616318
994	0.624692	0.91876	0.482961	0.86215	0.704827	0.77953	0.678355	1.97571	1.97148	0.7933
995	-0.584981	-0.298235	-0.301904	-0.615602	-0.130111	-0.654854	-0.483206	1.09524	1.02151	-1.41257
996	0.862757	0.672919	0.987266	0.551689	0.719073	0.627788	0.725905	1.01658	1.01955	0.238896
997	1.13052	1.21693	1.10248	0.958053	1.10758	1.14769	1.28343	1.34609	1.38355	1.07825
998	1.25783	1.17011	1.23609	1.08553	0.924939	1.27461	1.26664	2.35824	2.364	0.840307
999	0.333953	0.376575	0.261028	0.222078	0.428381	0.588121	0.221653	-0.698204	-1.6744	-0.0832397
1000	1.44867	0.79396	1.59629	1.43864	1.31957	1.49843	1.34599	1.2776	1.21244	1.69619
1001	1.48533	-0.457223	1.35003	0.651611	1.44932	1.6258	1.36917	0.0201857	-0.78502	-1.07859
1002	-0.552992	-0.705952	-0.735662	-0.725989	-0.21057	-1.82535	-0.419247	-1.69679	-0.484962	-0.70412
1003	0.00497067	0.561306	0.0296394	0.0617024	0.261369	0.271529	0.536925	-0.46088	-0.848007	0.00311724
1004	-0.465906	-0.522326	-0.149443	-0.326351	-0.386757	-0.469072	-0.11567	-1.11097	-0.682534	-0.388476
1005	-1.05955	-2.36362	-1.80205	-1.09938	-2.10475	-2.13763	-1.03396	-2.16996	-0.850659	-1.5762
1006	0.402087	-0.336254	0.557109	0.749428	0.662137	1.00711	0.704059	-0.521161	-0.40792	-0.382895
1007	-0.969442	-1.38854	-1.20936	-0.0840175	-0.644063	-0.937318	-1.05721	-0.985628	-1.67518	-1.30313
1008	1.27046	-0.0177437	1.45793	1.42649	1.58398	1.33492	1.23528	-0.677712	-0.225687	-0.421605
1009	-0.0662323	0.0571928	-0.865875	-0.30019	-0.997887	-0.34334	0.0797387	0.760888	0.982781	-0.325767
1010	1.40663	0.167761	-0.328851	1.62453	-0.825065	-0.569454	0.953522	-1.24987	-0.551788	1.35825
1012	-0.443939	-0.706849	-0.560751	-0.584897	-1.29302	-1.14308	-0.880278	-0.0364785	-0.119338	-0.992709
1013	-0.883051	-1.10495	-0.802335	-0.580977	-0.824836	-0.0723523	-1.04855	-0.827727	-1.27564	-1.19312
1014	-1.63266	-1.80006	-1.49586	-1.54261	-1.21237	-1.6684	-1.27795	-1.62282	-1.76563	-1.82107
1015	-1.10057	-0.374065	-0.0835562	-1.34492	-0.890511	-0.66185	-0.0893158	-1.33335	-1.38526	-1.07896
1016	0.614427	0.934864	1.46567	1.41167	1.63086	1.31422	1.28384	-0.833673	-0.607239	1.48049
1017	0.12859	0.258064	0.0308969	0.0712547	0.0695223	0.154114	0.215577	1.52327	1.47457	-0.0200236
1018	-0.0911309	-0.375653	-0.718603	-0.573302	-0.219914	-0.690166	-0.719133	-0.474373	-1.17353	-0.660739
1019	1.55097	1.87268	1.66683	1.59749	1.56128	1.60531	1.72076	2.12887	2.03038	1.57208
1020	0.936569	1.51284	1.0378	1.09428	1.11064	1.12289	1.15679	0.893423	1.18651	1.01703
1021	-0.482694	0.52762	0.121313	-0.277304	0.249548	0.355949	-0.0503432	0.443533	0.419769	0.412709
1022	0.90236	1.27225	0.826858	0.962109	0.734695	0.789502	0.6498	1.28514	1.21302	0.870371
1024	0.989962	0.483462	0.495253	0.781628	0.623165	0.749528	0.649583	0.648924	0.742219	0.50298
1025	0.791573	0.845988	0.911713	0.963209	0.917757	0.960496	0.899176	0.802847	0.966111	0.596758
1026	-2.22699	-1.12823	-0.676211	-0.775812	-0.986957	-1.76009	-0.596843	-0.660068	-0.608167	-1.55097
1027	1.37943	1.37585	1.57685	1.58296	1.55036	1.50663	1.63152	1.33574	1.24579	1.44303
1028	-0.0294019	-0.542012	-0.379772	-0.176105	0.0831834	0.0247617	0.106354	-0.338382	0.00393388	-0.26853
1029	-1.26232	-0.348264	-0.314564	-1.78176	-0.260159	-1.5126	-0.612567	1.69865	1.68683	-0.30133
1030	-1.0536	-0.331332	-0.184206	-0.544138	-0.928456	-0.565699	-0.545357	-0.145753	-0.00936346	-0.338585
1031	0.309505	0.233289	0.202216	0.500393	-0.195849	0.131019	0.129414	1.49334	0.941502	0.522601
1032	0.0370957	0.253037	0.205086	0.532293	0.349482	0.479022	0.440615	0.052622	0.0376449	0.0154875
1033	-0.924565	0.261838	-0.695623	-0.480246	0.0902701	-0.363946	-1.00475	1.74717	1.61253	0.079541
1036	1.72781	0.885525	1.25149	1.5468	1.18374	1.49298	1.33398	0.610693	0.461611	1.0545
1038	0.0720074	0.657869	0.459078	-0.791996	-1.2028	0.572357	0.00229102	-2.10052	-1.85153	-0.308896
1039	0.937306	1.41832	0.769916	1.06081	0.650832	0.687156	1.03535	1.21341	1.10544	1.36289
1040	1.20309	0.408496	0.730985	1.2989	0.932461	1.26659	0.801769	-1.53364	-1.43981	0.372633
1041	-1.13473	-1.14227	-1.15104	-1.18272	-0.977815	-1.57743	-1.04729	-1.55661	-1.23666	-1.73293
1043	1.45414	0.353999	0.99998	-0.0570543	0.518969	0.98353	1.04902	-0.442432	-0.440351	-1.24864
1044	-1.12397	-1.40576	-1.20803	-1.22515	-0.666037	-1.2318	-1.09184	-0.924563	-1.01934	-1.49036
1045	-1.09141	-1.22464	-0.967608	-1.25981	-0.83502	-1.0525	-0.93197	-1.42453	-1.2408	-1.57705
1046	-1.7154	-1.85276	-1.52185	-1.68554	-1.39555	-1.59383	-1.67037	-1.68015	-1.80971	-1.50415
1047	0.575561	0.47977	0.650859	0.836877	0.616762	0.741852	0.569193	0.80324	0.71524	2.01223
1048	-0.383686	-0.895002	-0.152696	-0.259097	-1.25561	-1.20128	-0.46384	-0.784519	-0.487025	-0.419993
1050	0.467621	-0.141238	0.113621	-0.0404573	-0.931098	-0.610901	0.423215	-1.03884	-1.21093	-0.210606
1051	1.48223	1.71622	1.12921	1.41175	0.978231	1.3347	1.3549	2.10393	2.34515	1.01827
1052	1.97285	2.10797	1.93742	1.66132	0.693886	1.50943	1.60472	2.07858	2.03701	2.4952
1053	-1.24448	-0.163255	-0.355998	-0.283202	-0.316211	-0.159809	0.172305	-1.19742	-0.600877	-0.243823
1054	0.307388	0.393358	0.339353	0.34677	0.325033	0.370464	0.358379	0.51319	0.47257	0.22989
1056	NA	NA	NA	NA	NA	NA	NA	NA	NA	NA
1057	-0.620394	0.171911	-0.105676	-1.46974	-0.633436	-0.903072	-1.07763	-1.46938	-1.804	-0.589687
1058	-1.45015	-0.161147	-1.5641	-0.692379	-0.920956	-0.731551	-0.587397	1.49531	1.32471	-0.696639
1059	0.599551	0.765215	0.635597	0.704862	0.736021	0.794073	0.705899	1.0639	1.1035	0.75586
1060	0.335114	0.35222	0.361293	0.544853	0.312442	0.452185	0.437302	0.358653	0.327929	0.291004
1062	-1.25135	-1.23113	-1.17246	-1.55027	-1.04034	-1.55467	-1.43988	1.12851	1.05538	-1.16954
1063	-0.378619	0.168218	-0.0368586	-0.0334484	0.230482	0.0936012	0.207668	1.77511	1.72867	-0.0638236
1066	-1.76652	-1.74989	-0.926867	-0.0178633	-0.897504	-0.948282	0.103804	-0.842897	-1.27024	-1.62024
1068	0.0801901	0.224858	-0.0274321	0.14354	0.2413	-0.180011	0.0942855	-0.31132	-0.24323	-0.0992343
1069	1.74296	1.98997	1.78912	1.86214	1.80692	1.93172	1.84714	1.46481	1.33782	1.4581
1070	1.34963	1.38792	1.47798	1.55964	1.30165	1.32843	1.45658	1.15527	1.07674	1.45461
1071	-1.88944	-0.152424	-1.79699	-1.54902	-1.03697	-1.9291	-1.76014	-2.1402	-1.90619	-2.00222
1072	2.08296	1.93936	1.98846	2.11545	2.21587	2.136	2.15373	2.42475	2.45948	1.76191
1073	0.886751	0.761728	1.0737	0.982522	0.902887	0.964008	0.905476	1.42739	1.50159	1.10961
1075	0.840459	0.403888	0.939076	0.499454	0.551629	0.846493	0.83701	1.35401	1.4328	0.885958
1080	0.154008	-1.67134	-0.807155	0.237562	0.209123	-1.11336	-0.730392	-1.95595	-1.56716	-1.55244
1081	2.7042	1.8761	2.3235	2.55912	0.123928	2.121	1.92306	-1.14551	0.223519	2.64722
1082	NA	NA	NA	NA	NA	NA	NA	NA	NA	NA
1084	0.122862	0.151683	0.128478	0.040238	0.17153	0.131807	0.118322	-0.0640646	0.0716808	0.0322196
1087	-0.873	-2.01472	-0.985108	-1.57343	-1.33498	-1.6543	-1.48861	-1.82691	-1.48659	-2.67718
1088	-1.61323	-1.81322	-2.00237	-0.919699	-1.1654	-1.31222	-1.13224	-1.168	-0.59886	-2.40663
1089	-0.152354	-0.428877	-0.0949594	-0.141067	-0.137431	-0.179637	0.0538412	-0.273897	-0.229393	-0.00389364
1101	-1.15519	-1.43509	0.363276	-0.909852	-0.497576	0.51024	-1.13251	-1.18971	-1.48786	-0.904055
1102	-1.12878	-0.883446	-1.2997	-1.69846	-0.345144	-1.05923	-1.06188	-1.59875	-1.21276	-1.38705
1103	-1.87277	-1.59234	-1.37634	-1.93938	-1.44265	-1.52612	-1.32237	-1.7147	-1.89427	-1.14066
1104	-0.216561	-0.238717	0.226187	0.0584263	0.0794955	0.0493957	0.166636	1.27952	1.32089	-0.199138
1105	1.20467	1.30432	1.3399	1.07872	1.37621	1.05905	1.06833	1.41667	1.38706	0.989936
1106	0.0840926	0.400463	0.136465	0.0359063	0.204585	-0.0485732	0.218936	0.0730552	-0.300448	0.492435
1107	0.676094	0.164342	0.73839	0.895737	1.09489	0.763718	0.517971	0.265341	0.430675	0.117369
1108	0.584329	0.342129	0.383823	0.395746	0.693224	0.630208	0.4917	0.96822	0.97467	0.0944756
1109	-1.73407	-0.617771	-1.58407	-1.47016	-1.35303	-0.653683	-1.6863	-1.19509	-0.84125	-0.77953
1111	-0.156924	-0.539852	-1.21266	-0.67328	-0.169051	-0.261215	-0.478849	0.864258	0.850496	-1.15488
1112	0.450311	0.12971	0.226849	0.202798	0.528895	-0.0821888	-0.0849596	0.151286	0.203555	-0.253558
1113	2.58449	2.14128	2.6503	2.77738	2.74094	2.5557	2.61802	-0.585256	-1.17904	2.6075
1114	2.56077	2.55894	2.43761	2.38612	2.41936	2.4654	2.45032	-0.495852	-0.331812	2.87582
1116	-0.272108	-0.344524	-1.05255	0.0898514	-1.27535	-0.823521	1.44926	0.965252	1.11724	0.157276
1117	0.0780507	-0.220427	-0.53411	0.292134	-0.467905	-0.497222	0.390771	-0.542444	-0.259205	-0.107925
1118	-1.59422	-1.24457	-1.25424	-0.935707	-1.08826	-1.11161	-0.495416	-1.46067	-1.19298	-1.85899
1119	0.690907	0.701601	0.175059	0.549424	0.427654	0.625736	0.495019	0.841867	0.555755	0.312812
1120	1.20623	1.20492	1.23374	1.32871	1.09523	1.27349	1.28614	0.614004	0.636539	1.23776
1121	-2.48761	-2.1106	-1.19742	-1.22367	-2.57677	-2.16895	-0.836426	-1.06153	-0.737488	-0.654573
1122	-2.19539	-1.81277	-2.03644	-1.84552	-1.82579	-2.07732	-0.836507	-1.72001	-0.759455	-1.80135
1123	2.20871	1.7739	2.51193	1.68687	1.64303	2.12956	2.065	1.56956	1.65336	1.196
1124	-0.17728	0.656485	-0.460756	0.10404	0.0141056	0.169234	-0.0947513	-0.625117	-0.107279	0.470145
1128	-1.41508	-0.66257	-1.55723	-1.34471	-1.17305	-0.812522	-0.64509	-1.51076	-1.13621	-0.664777
1129	-0.451886	-1.08496	-1.26526	-0.925148	-1.26506	-1.40894	-0.542961	-1.9124	-1.02093	-0.434461
1130	-1.55553	-0.87701	-1.34569	-0.740564	-0.987889	-0.529869	-1.3085	-0.718605	-1.41792	-0.811378
1131	-1.14739	-0.892052	-1.22652	-0.535251	-0.315178	-0.482242	-1.10984	-1.35711	-0.523038	-0.89556
1132	-1.57792	-1.68561	-1.4921	-0.502713	-1.29417	-0.289389	-1.02853	-1.65411	-1.13934	-1.33855
1133	0.0676632	-0.360773	0.285133	-0.0294668	0.455947	-0.132889	0.492521	-0.482544	-0.259652	0.245853
1134	-0.201475	-0.902529	-0.35559	0.00778154	-0.0739351	-0.602787	0.216488	-1.318	-0.371748	-0.203883
1135	0.157891	0.22335	0.233633	0.091925	0.152231	0.0983872	-0.0398198	-0.0107098	0.142642	0.267657
1136	0.445985	0.799577	0.157598	0.592989	0.297351	0.141446	0.410614	-1.24411	-1.14334	1.58527
1137	-1.02314	-1.6411	-0.688834	-0.688203	-0.863966	-1.08523	-1.11191	-1.59641	-1.38086	-1.16528
1138	0.693807	-0.589755	-0.0166482	0.247779	-0.312867	-1.00457	0.526677	0.0166328	0.0097121	-0.423185
1139	NA	NA	NA	NA	NA	NA	NA	NA	NA	NA
1140	0.11136	0.129502	0.134663	0.138991	0.131933	0.0125653	0.166807	0.887765	0.687785	-0.310711
1141	-0.135687	-0.171524	0.159432	0.0776373	-0.28674	-0.33391	0.21835	-0.467254	0.0770895	-0.0829444
1142	-0.260716	-0.572945	-0.2135	-0.14851	0.171347	-0.24749	0.104804	-0.385371	-0.15319	-0.154759
1143	-0.788931	-0.568759	-0.682002	-1.26018	-1.35958	-0.718453	-1.36934	-1.29589	-0.324503	-0.0400759
1144	-1.20353	-1.31315	-1.18705	-0.691651	-1.16682	-1.42273	-0.980688	-1.40921	-0.930383	-1.25347
1145	-1.17189	-0.24682	0.0979026	-0.323965	-1.2364	-0.397886	-0.362184	-0.328106	-1.1463	-1.32553
1146	0.0811586	-0.226777	0.127716	-0.00571666	-0.1512	0.190067	0.27844	0.0261934	0.221855	-0.28171
1147	0.884868	0.365039	0.773777	0.848671	0.691036	0.744823	0.662165	0.806518	0.715686	0.710927
1149	-0.496225	-0.391511	-0.193607	-0.898789	-0.974361	-0.0245436	-0.153835	-0.659155	0.0014872	-0.561164
1152	1.03104	1.09936	0.86916	1.26348	0.778341	0.94406	1.11714	0.710482	0.940364	1.68671
1153	2.5149	2.31698	2.55145	2.49949	2.41726	2.43148	2.47716	1.62563	1.53722	2.4222
1154	-0.865538	-0.587787	-1.24254	-1.19892	-0.60115	-1.07655	-1.24825	0.0442952	-0.229666	0.13694
1155	1.79406	1.94044	1.82963	1.9723	1.97295	1.85066	1.93636	1.64122	1.73384	1.46011
1158	-1.191	-1.61741	-0.98693	-0.941656	-1.06164	-1.0835	-0.113535	-1.55386	-1.338	-1.43228
1160	0.26409	-0.514255	0.399335	0.184049	0.282373	0.561607	-0.0489541	-0.567266	-0.91167	-0.0864729
1161	-1.23452	-2.04303	-1.402	-0.985853	-1.77017	-1.64778	-1.69141	-0.830758	-0.816939	-1.07812
1163	0.888642	1.04786	0.920913	1.02333	1.05754	0.816464	1.11917	1.91586	1.87114	0.657501
1164	-0.206989	0.934968	0.125657	0.138057	0.453095	0.122192	0.513627	2.13605	2.11104	0.625684
1173	1.80774	1.91575	1.70488	1.91723	1.96925	1.82582	1.6929	2.21011	2.19211	1.80539
1174	0.121275	0.419292	0.0437316	0.0259236	0.115876	0.358199	0.405329	0.292783	0.19724	-0.0836524
1175	1.20455	1.41375	1.25065	1.27521	1.36675	1.26753	1.26622	1.7026	1.74293	1.21081
1176	1.571	2.11947	1.69664	1.48675	1.48105	1.52953	1.56947	1.94269	1.89203	1.8754
1178	-0.933832	-1.03428	-0.205554	-1.11952	-1.2768	-0.216202	-0.817226	-1.12212	-1.24098	-1.19455
1179	-0.416244	-0.428924	-0.149332	-0.932837	0.117982	-0.0756856	0.131746	-0.705555	-0.237935	-0.27541
1180	-0.989994	-1.42801	-0.907278	-0.331674	-0.819628	-1.14488	-0.971522	-1.44113	-0.922783	-0.495214
1181	-0.0792512	0.201119	0.208075	-0.145103	-0.008596	-0.010646	0.124402	-0.109856	-0.178009	-0.198602
1182	1.72576	1.44465	1.46783	1.48024	1.42107	1.45959	1.52761	0.725081	0.752903	1.6637
1183	0.457885	0.684424	0.531605	0.595184	0.840041	0.704889	0.775389	-0.812567	-0.762397	0.387828
1184	0.624213	0.231205	0.629323	0.313473	0.574451	0.577357	0.360622	-0.470831	-0.326782	0.0822544
1185	0.461084	-0.0273339	0.534056	0.646495	0.571129	0.52497	0.585662	0.21714	0.0244679	0.209145
1186	0.603588	0.191882	0.713468	0.273842	0.590132	0.411196	0.446859	0.707421	0.688834	0.522726
1187	NA	NA	NA	NA	NA	NA	NA	NA	NA	NA
1188	0.968478	0.019965	1.38616	1.4791	1.41636	1.24441	1.07516	-0.732059	-0.265899	-0.513298
1191	2.74877	2.02722	2.61468	2.61683	2.65709	2.57815	2.63259	1.59825	1.42833	1.60111
1192	1.5337	1.98381	1.38363	1.64704	1.66844	1.31707	1.7268	2.26287	2.34269	0.728298
1193	-0.460571	-0.419479	-1.09275	-0.941417	-0.350004	-0.530229	-0.287515	-1.94984	-2.15593	-0.386741
1195	NA	NA	NA	NA	NA	NA	NA	NA	NA	NA
1196	1.10952	1.30509	1.25871	1.16284	1.03056	1.1529	0.99778	1.18659	1.08257	1.35781
1197	NA	NA	NA	NA	NA	NA	NA	NA	NA	NA
1198	0.727942	0.679419	0.850878	0.596532	0.70333	0.684824	0.788522	0.648531	0.821557	0.775208
1200	1.79799	1.39261	1.62368	1.53208	1.64534	1.79046	1.79036	1.53859	1.55836	1.68948
1201	0.638305	0.71509	0.754074	0.713409	0.890244	0.51823	0.845874	0.620956	0.576069	0.405493
1203	0.964994	1.0625	1.0194	0.93606	0.42841	0.731915	1.00237	0.89894	0.839055	1.61023
1207	1.58367	1.35483	1.59106	1.65695	1.50036	1.46494	1.59358	1.48397	1.31682	1.53648
1208	-0.136579	-0.476699	-0.0747669	-0.0458661	-0.03074	-0.23821	0.0618744	-0.583342	-0.396527	0.00956784
1209	1.09464	1.00037	1.02502	0.958053	1.02042	1.12447	1.15835	1.03538	1.11246	0.934575
1211	0.0497523	-0.46393	0.0528201	-0.0590239	0.0444378	0.0606594	-0.309397	-0.141603	0.109152	0.0821221
1212	1.25624	1.16061	1.18009	1.51795	1.22773	1.21821	1.25768	1.09329	1.0023	0.789655
1213	2.51138	2.50996	2.46486	2.43742	2.4354	2.45158	2.50908	2.44399	2.55637	2.42474
1215	-0.265993	-0.999048	-1.3926	-0.327485	-1.37101	-1.30441	-1.04421	-0.633957	-1.09353	-1.39375
1230	-0.0323373	-0.0393996	-0.0659144	-0.00903296	-0.243402	0.0331539	0.272847	-0.558582	-0.252627	-0.26087
1232	-0.971644	-1.5337	-0.956171	-1.30833	-0.626383	-0.502215	-0.61443	-1.0669	-1.40658	-1.30036
1233	-1.39372	-1.22437	-0.729857	-1.17599	-0.794649	-0.35824	-0.62081	-1.27552	-0.337494	-0.472563
1234	-0.6661	-0.903302	-0.886153	-0.19407	0.0110903	0.26253	-0.248696	-1.58499	-0.244953	-0.663345
1235	-0.764094	-1.10375	-1.07046	-0.627829	-0.457892	-0.511167	-1.0768	-1.00045	-0.822103	-0.813383
1236	-0.669872	-0.662717	-0.184118	-1.42269	-0.29013	-0.893247	-0.0506359	-0.815822	-0.574463	-1.08822
1237	-1.32158	-0.721558	-1.18196	-1.18045	-1.09649	-0.373672	-1.40872	-1.29848	-1.31165	-1.19115
1238	-1.19844	-0.988379	-0.712014	-1.11931	-1.08473	-1.48088	-0.864391	-0.662756	-0.951683	-1.70689
1240	0.240637	-0.487327	0.302091	0.190513	0.38437	0.139568	0.360569	-1.14934	-1.01275	-0.39368
1241	-0.843566	0.179602	-0.935401	-1.01659	-0.578779	-0.701958	-1.3941	-1.12802	-0.0625378	-1.61493
1244	-1.1792	-1.82708	-1.61346	-1.87963	-1.01409	-1.71393	-1.6394	-1.81926	-1.04602	-1.93433
1258	-0.509057	-1.91347	-0.314908	0.302155	-0.156794	-1.25889	-0.528121	-1.52826	-0.803474	-0.690345
1259	0.92634	0.0159967	0.963853	1.10536	0.0370381	0.856509	1.05614	-0.666347	-1.77988	-0.579401
1260	NA	NA	NA	NA	NA	NA	NA	NA	NA	NA
1261	-2.10126	1.01926	-1.57369	-1.27439	-1.62698	-1.99118	-1.44379	-2.40815	-1.97648	0.659206
1262	-0.22594	-0.643375	-0.703484	-0.129272	-0.674976	-0.388407	-0.717572	-1.21745	-1.33672	-0.759623
1263	0.505527	0.051095	-0.00192436	0.525267	0.587323	0.294193	0.490025	0.706976	0.778052	-0.107686
1264	-1.21678	-1.47625	-0.550906	-1.51435	-0.798634	-0.456781	-0.494044	0.736603	0.556204	-1.63119
1265	0.15677	0.125989	0.546682	0.087602	0.227164	0.0339217	0.547261	1.4163	1.34079	-0.0358827
1266	1.19294	0.844024	1.34341	0.937489	0.899667	1.38411	0.979514	2.00468	1.96562	-0.401947
1267	0.335908	0.0547369	0.437213	0.461016	0.447131	0.499583	0.532785	-0.0626804	0.206037	-0.0913559
1268	-1.83834	0.363199	-1.20158	-1.09124	-0.290364	-1.54172	-0.977809	-0.957711	-0.724528	-0.0179511
1269	0.117831	-0.0396676	0.447833	0.161378	0.222901	0.101269	0.233428	-0.36945	0.102578	-0.013463
1270	NA	NA	NA	NA	NA	NA	NA	NA	NA	NA
1271	-0.0909724	0.0432224	0.145391	-0.0466488	-0.189903	0.0763019	0.282312	-0.403964	0.147421	0.644942
1272	0.485312	-0.0756903	0.467527	0.265735	0.380944	0.425681	0.371513	-0.599978	-0.555853	0.560353
1277	0.417373	1.23813	-0.0226419	-0.101565	0.0321041	0.580093	0.857434	2.3408	2.29424	0.432035
1278	0.363507	1.59574	0.389632	0.105254	0.550202	0.707532	1.23173	2.37203	2.50479	1.01738
1280	1.15491	0.0197455	0.885377	0.941456	1.51279	0.933019	0.776662	-0.759435	-0.728934	-0.383923
1281	0.483827	1.49209	0.116084	-0.26691	-0.130379	0.791775	1.2777	2.00106	1.81906	0.0328135
1282	0.493012	1.37572	0.144163	0.495998	0.571073	0.560378	1.25792	1.47798	1.67138	0.460456
1284	0.653575	1.26748	0.375738	0.294644	0.522995	0.284802	1.18979	1.82769	2.04073	0.345134
1285	0.160887	1.15949	-0.431375	-0.257855	-0.077327	-0.260186	-0.398325	-1.76827	-1.3798	1.30651
1286	-0.984416	0.976721	-1.01324	-1.21219	-1.64391	-1.48852	-1.04815	-2.31083	-1.01997	0.457977
1287	0.447891	0.0585742	0.0675134	0.334548	-0.000372161	-0.206424	0.314778	0.769724	0.626152	-0.376958
1288	-0.290567	-1.45469	-0.728171	-1.36938	-0.700642	-0.909026	-1.02806	-0.739363	-0.683503	-1.31896
1289	-0.160156	0.10588	-0.843954	-1.10854	-1.16964	-1.18141	-0.436742	1.15828	1.03359	-0.813874
1290	0.384705	0.636996	0.314438	0.777488	0.317177	-0.0354488	0.194791	1.74393	1.62153	-0.21163
1291	-1.39014	-0.218013	0.269296	-1.04031	0.122155	0.775793	-0.98793	1.5141	1.72102	-1.70296
1292	-0.464563	0.611279	-0.712684	-1.63318	-0.251257	0.0656334	0.484799	2.02158	2.22186	-0.146746
1293	-0.233818	0.672198	-1.18487	-0.824416	-0.60608	-0.302556	0.344361	-0.232709	0.573325	-0.713766
1294	-0.0492131	-0.125236	0.165576	0.0391393	0.341301	0.0925373	0.000628861	0.631438	1.06186	-0.180998
1295	-2.37838	-1.00916	-1.85469	-1.132	-1.24425	-0.738979	-0.505468	0.53314	0.824813	-1.94225
1296	-0.936907	-0.562528	-0.786137	-0.666205	0.062659	-0.824143	0.339562	0.570329	0.348528	-1.45211
1297	-2.33095	-0.994756	-1.41467	-1.78702	-2.0232	-2.22364	-1.77918	-2.59918	-1.89102	-0.904378
1298	0.178463	0.559705	0.00121702	0.465501	-0.0449638	0.311569	0.190531	-0.0269633	-0.0116165	2.02619
1299	-0.606519	-1.32257	-1.63498	-0.248729	-1.36207	-1.30862	-0.958892	0.164529	-0.222292	-1.59623
1300	-0.74305	-0.209436	0.0929168	-0.321626	0.0332102	-0.0761518	-0.0916587	-0.551474	-0.112898	-0.11159
1301	-0.726695	-0.324997	0.400212	-0.412921	-0.376289	-0.418606	-1.4152	1.38557	1.13887	-0.682209
1302	0.0155828	-0.194101	-0.104965	0.0447877	-0.21349	0.0891786	-0.210513	-0.39475	-0.438639	-0.658223
1303	-0.0337322	0.024792	-0.189466	-1.08941	-0.937764	-0.486827	0.392061	1.77159	1.75667	1.28631
1305	-1.05874	-1.08379	-0.962834	-1.03342	-0.96307	-0.758279	-0.478141	-0.451057	0.384304	-1.47259
1306	-0.158641	0.319272	-0.126755	-0.260844	-0.0396609	-0.455727	0.417021	-0.212521	0.217728	0.129339
1307	0.619139	0.65441	0.516573	0.217193	0.0477234	0.479242	0.511375	0.505908	0.609793	0.0146742
1308	-1.57824	-1.64405	-1.47308	-1.55532	-1.4693	-1.48229	-1.45495	-1.66555	-1.5074	-1.81926
1310	-1.371	-1.89083	-1.69452	-1.6159	-1.53961	-1.4068	-1.031	-1.85493	-0.425873	-0.885074
1311	-0.787093	-0.303593	-0.261022	-0.480415	-0.305289	-0.211729	-0.158071	-0.240902	-0.241051	-0.517299
1312	1.29977	0.972866	1.09114	1.20742	1.12959	1.02296	1.36033	1.27941	1.36758	1.70712
1314	-1.19388	-1.31093	-1.89241	-1.29289	-1.45063	-1.17456	-0.755069	-0.971861	-0.884523	-0.444553
1315	1.99071	1.91754	2.02251	2.0418	1.8779	1.98585	2.03994	2.07602	2.07314	2.08017
1316	-0.00687101	0.615844	-0.122675	0.228702	-0.307439	-0.0766811	0.447722	1.53252	1.56103	0.718448
1317	0.271866	0.796247	0.193103	0.217529	0.503817	0.324303	0.470998	0.939821	0.733841	0.916335
1318	0.615208	0.270524	0.9871	0.0155315	0.613657	1.03195	0.701666	0.527224	0.495649	-0.189156
1325	0.504253	-0.0324577	0.28128	0.303326	0.208827	0.0226963	0.169245	0.0832991	0.0849052	0.209257
1326	-0.729157	-1.63477	-0.526172	-0.604063	-0.179357	-0.471329	-0.213384	-0.526131	-0.207297	-1.97298
1327	2.17176	2.35349	2.33268	2.2138	2.21536	2.21538	2.3092	1.97287	1.96546	1.98767
1329	2.10288	2.24464	2.18339	2.09782	2.01392	2.17974	2.18014	1.94708	1.99783	2.00056
1337	2.52743	2.65826	2.59805	2.5488	2.57098	2.49815	2.6376	2.40648	2.46703	2.6246
1339	0.0719863	-1.07818	0.397785	-0.203695	0.196503	0.298246	0.15929	-0.313115	-0.239852	1.56065
1340	1.98515	2.11737	2.06459	1.98442	1.99825	1.98198	2.05431	1.75431	1.7046	1.86643
1345	2.34968	2.40367	2.43735	2.36743	2.25682	2.28709	2.30602	2.19471	2.15195	2.59906
1346	1.86401	1.70942	2.20722	2.18418	2.31212	2.29469	2.25035	-1.36258	-1.81687	2.22999
1347	2.17988	2.0849	2.26168	2.24447	2.14238	2.17274	2.24267	2.08916	2.04489	2.27952
1349	1.96591	2.05129	2.16004	1.86085	2.02051	1.98875	2.06303	1.96783	1.92594	1.93134
1350	2.43164	2.57247	2.56085	2.49513	2.49676	2.36789	2.51369	2.2732	2.17934	2.41643
1351	2.37819	2.13403	2.44958	2.39872	2.41356	2.36728	2.48709	2.29816	2.22917	2.30555
1352	0.812025	0.734178	0.801693	0.727532	0.954034	0.863429	0.82296	0.881793	0.817682	0.564547
1353	0.684345	0.837071	0.842668	0.845848	0.900786	0.886473	0.802259	0.61914	0.440118	0.786825
1355	0.848033	0.941232	1.09533	1.04742	0.966431	0.9248	0.974001	0.989032	0.879884	0.880477
1356	-1.78561	-1.89642	-1.38803	-1.52034	-1.72431	-1.55228	-0.275209	-2.26311	-1.9699	-1.3725
1357	-1.4872	-1.61944	-1.25721	-1.35866	-1.40186	-1.122	-1.24865	-0.682553	-0.775774	-0.697893
1358	0.0651283	-0.483184	0.107713	-0.162624	-0.0150135	-0.663367	-0.346814	-0.47396	-0.282373	-0.275896
1359	0.0967674	-0.328477	-0.12509	0.00140731	0.041346	0.108152	0.370823	0.390163	0.054289	-0.00816813
1360	-0.398328	-1.92659	-0.118902	-1.29169	-1.02316	-1.26909	-1.01741	-0.434926	-0.670181	-0.822697
1361	-1.45098	-1.60795	-1.50836	-1.51609	-1.32764	-0.622629	-0.916648	-1.96149	-1.49273	-1.09187
1362	0.973138	0.779523	0.73367	0.748127	0.845606	0.934369	0.951492	1.09338	0.996201	0.613499
1363	2.52515	2.53098	2.49175	2.33978	2.33639	2.47036	2.56937	1.18583	1.11108	2.73281
1364	-1.73588	-1.60616	-1.05778	-1.39707	-1.38028	-0.992453	-0.930691	-1.3086	-1.4676	-1.60756
1365	0.480601	1.09493	0.0913024	0.626183	0.366388	0.0566495	0.138654	-0.651495	-0.42339	0.626391
1366	0.95125	-0.0964435	0.410963	1.09578	0.000100008	0.670656	0.467221	-0.404092	-0.608549	0.0212376
1368	-0.188885	0.479428	-0.0786527	-0.571882	-1.48132	0.197045	-0.15025	-0.549607	-0.537639	0.153064
1369	-0.11347	-0.434011	0.0186781	-0.00748063	-0.0568586	-0.249681	-0.143023	-0.465358	-0.245052	-0.37932
1370	-0.547386	-1.17269	-0.482306	-0.59175	-0.268701	-0.206287	-0.15693	-1.19294	-0.331275	-1.25454
1371	0.289504	0.449509	0.46854	0.316582	0.265568	0.303502	0.336517	0.852584	0.915035	0.246553
1373	-0.433882	0.100069	-0.331773	-0.13044	-0.131655	-0.666004	-0.381709	0.639161	0.304778	-0.235128
1374	0.691293	0.963653	0.541099	1.00887	0.287837	0.849512	0.811201	0.566766	0.683755	0.877931
1375	NA	NA	NA	NA	NA	NA	NA	NA	NA	NA
1376	0.472343	0.368238	0.42652	0.42405	0.441794	0.66299	0.389199	0.424393	0.551152	0.239126
1378	-0.962169	-1.45316	-0.500376	-0.700116	-1.13391	-0.742452	-0.412307	-1.01002	-1.23467	-0.798367
1379	-1.05862	-1.75731	-0.802509	-1.1348	-1.5074	-0.976369	-0.918103	-1.5884	-1.00937	-1.41734
1380	-1.34009	-1.84126	-1.11906	-1.44515	-1.3877	-1.61396	-1.21022	-1.73835	-1.4035	-1.01135
1381	-0.601502	-0.897026	-1.57461	-0.335802	-0.748816	-1.3058	-0.30145	-1.57821	-0.199805	-0.799214
1382	1.66028	0.243613	1.43653	1.3219	0.754456	1.83841	1.02739	0.428212	0.247137	-0.105628
1384	0.227691	-0.0421455	0.440358	0.154289	0.50885	0.172008	0.810155	0.358379	0.642058	-0.296388
1385	0.92411	0.750347	0.805596	0.952395	1.11407	1.0466	0.832595	0.975046	0.925696	0.452992
1386	-0.642456	-0.978173	-1.54155	-0.415459	-0.442984	-1.72621	-0.884736	-1.52049	-1.65476	-1.49075
1387	0.9974	0.869555	1.0702	1.07643	1.00629	1.06317	1.11869	1.35274	1.0513	0.904478
1388	-0.531238	-0.520251	-0.846137	-1.43888	-1.09066	-1.26649	-0.676391	-1.09874	-0.967711	-1.50976
1389	1.45394	1.48608	1.47961	1.58865	1.68278	1.50368	1.56297	1.01957	1.12424	1.33671
1390	0.75974	1.16463	0.411329	0.689663	0.453836	0.582251	0.598948	0.731246	0.789355	0.731083
1392	-0.996103	-0.91437	-0.764155	-0.978462	-0.653122	-1.1729	-0.512714	-1.38654	-1.14985	-1.33678
1393	-0.810264	-1.40305	-1.11424	-1.16385	-0.466615	-0.485778	-0.800011	0.339243	0.0811967	-1.42711
1394	0.102103	-0.495562	-0.761175	-0.15991	-0.128493	-0.0231111	-0.215626	-0.489856	-0.615712	-0.343984
1395	-0.166391	0.386057	0.374002	-0.0197136	0.234983	0.342666	0.243167	-0.799507	-1.35443	0.869569
1396	-0.447491	1.00879	-0.035267	0.0164513	-0.576457	0.266988	0.378598	-0.522474	-0.330984	-0.355119
1397	1.45864	1.47626	1.66982	1.57565	1.45369	1.58739	1.51346	1.26675	1.38034	0.0791476
1398	0.672223	0.80429	0.65693	0.661254	0.687201	0.844064	0.764432	1.23396	1.2498	0.456546
1399	0.32794	0.107415	0.233816	0.183667	0.306945	0.406427	0.330249	0.58539	0.605936	-0.581323
1400	1.64095	1.87346	1.73965	1.89998	1.78757	1.7755	1.76853	-0.148011	-0.399418	1.80768
1401	-1.77026	-2.0272	-1.09646	-1.60102	-1.28942	-1.39245	-1.2583	-1.40823	-1.6988	-1.14605
1404	-0.850847	-1.52092	-1.15242	-1.29722	-0.863275	-0.978711	-0.449017	-0.787105	-1.71854	-1.36122
1406	-1.04456	-1.27955	-0.792105	-1.09532	-0.503774	-1.32262	-0.134459	-1.83324	-0.856919	-1.34699
1407	0.63082	0.454939	0.432217	0.836205	0.408964	0.498865	0.825818	1.13593	1.01168	1.2219
1408	0.559862	0.455075	0.739061	0.643581	0.48122	0.727853	0.02901	-0.258846	-1.15922	1.02185
1409	-1.50351	-1.52366	-1.52109	-1.20199	-1.34946	-1.25494	-1.35777	-1.57206	-1.53829	-1.39463
1410	0.373234	0.164589	0.184254	0.590712	0.304534	0.733293	1.12768	-0.360285	-0.246539	-0.370487
1411	-0.091883	-1.66599	-0.394507	-1.91596	-0.499542	-0.728492	-0.358123	-2.39151	-2.16963	-2.26158
1412	0.259109	-1.54918	0.390811	0.284377	0.684829	0.732732	0.24037	-1.9479	-2.05834	0.215597
1413	-1.67236	-1.55339	-1.01658	-1.62362	-1.25571	-1.55217	-1.16567	-1.5849	-1.42233	-1.40497
1414	-1.16122	-1.21084	-0.837011	0.0377708	-0.530733	-1.26426	-0.838521	-1.13537	-1.66402	-1.31613
1415	-1.16779	-1.36001	-1.06487	-1.47638	-1.25574	-1.11469	-1.26871	-1.3068	-1.42176	-0.801142
1416	-1.0533	-0.968599	-1.51808	-0.869098	-0.349221	-1.32712	-0.735773	-1.64378	-1.57155	-0.533505
1417	-1.42669	-1.50718	-1.13609	-1.45548	-0.836994	-1.28479	-1.16882	-1.73539	-1.50035	-1.65192
1418	-1.33106	-0.807695	-1.02607	-0.914353	-1.04342	-0.0579277	-0.229324	-2.00546	-1.5491	-1.21422
1419	-0.18481	-0.326974	-0.697154	-0.385195	-0.302922	-0.342908	-0.409894	-0.847002	-1.40722	-1.55939
1420	0.323195	-0.605084	0.074197	-1.08204	-0.650231	0.506922	-0.802528	-1.48137	-0.980892	-1.49352
1421	0.444645	0.249835	1.35118	0.435533	0.548659	1.61101	1.29807	-0.0511291	-0.267618	-0.0846033
1427	-0.155627	-0.253039	-0.0280901	-0.384591	-0.0433368	-0.219882	-0.243642	-0.240854	-0.352087	-0.406217
1428	0.490179	-0.194674	0.585349	-0.787604	0.734671	0.75149	0.886126	-1.06369	-0.236098	-1.06265
1429	1.73338	0.761371	1.64787	1.48578	0.966182	1.54002	1.56224	1.05846	0.906003	-0.14156
1431	1.61307	1.61038	1.54208	1.6451	1.62613	1.60592	1.57103	1.95482	1.8331	1.53364
1432	1.03147	1.12579	0.876043	0.963099	0.898247	0.958384	1.01176	1.13255	1.14704	0.909128
1434	1.01172	0.912749	1.19348	1.2893	1.10294	1.19012	1.06197	1.67304	1.54994	1.14074
1435	-1.30654	-1.02747	-1.45893	-1.56051	-1.0147	-1.47445	-1.28368	-1.03033	-0.458359	-1.16137
1436	1.20124	0.637862	0.813287	0.744498	0.478968	0.949401	1.1023	-0.541607	-0.0459316	0.244016
1437	-0.338747	-0.28518	0.196854	-0.172975	-0.703345	-0.672142	0.280795	-0.248616	-0.106223	-0.188374
1438	-0.888072	-1.2783	-1.07496	-0.642253	-1.10009	-0.467516	-0.945002	-1.58876	-1.73241	-0.699096
1439	-0.172922	-0.312699	-0.0277954	-0.430636	-0.171425	-0.272329	-0.00743369	-0.807443	-0.926269	-0.353524
1440	-1.41281	-0.438559	-0.746408	-0.819998	-1.06828	-1.24507	-0.887061	-1.11591	0.00534093	-1.35476
1441	0.289134	0.148353	0.414941	0.397955	0.445616	0.133646	0.472632	-0.244908	0.0776904	-0.234959
1442	-0.870656	2.3648	-1.59106	-1.29988	-1.46084	0.232674	-1.50966	-1.62282	-1.63308	-0.909635
1443	-1.07866	2.23106	-0.622983	-1.65167	-1.51261	0.366101	-1.54257	-1.69425	-1.80951	-1.49004
1444	-0.24792	1.02823	0.0123814	-0.337126	-0.944135	0.295004	-0.427474	-1.33667	-0.673317	-0.352194
1445	0.996967	0.532708	1.07939	0.959159	0.841589	1.1214	1.08351	1.19973	1.23329	0.781018
1446	-0.760449	-0.378784	-0.930573	-1.05582	-0.991495	-0.48071	-0.868853	-0.747571	-0.424815	-0.849303
1447	-0.0321146	-0.669081	0.272827	-0.183599	0.146215	-0.116878	0.435286	-0.608688	-0.289766	-0.179481
1448	-1.12633	-1.4787	-0.571921	-1.35725	-0.651087	-0.620974	-0.673717	-0.965757	-1.3861	-1.55451
1452	-0.0473356	0.0559792	-0.295227	-0.345346	0.0748129	-0.252081	-0.425321	0.372023	0.328272	-0.0503256
1453	0.995112	0.906925	0.916426	0.96604	0.961624	0.952335	0.981631	1.32765	1.35798	0.687374
1454	0.710236	0.481418	0.726375	0.648168	0.620469	0.652866	0.789405	0.826388	0.850326	0.44782
1455	0.977374	0.997803	1.0304	0.968382	1.02368	1.03887	1.12915	1.05104	1.12492	1.07349
1456	1.00319	1.15662	0.976847	0.874718	0.975663	1.04585	0.97758	1.20714	1.1812	0.610675
1457	1.00561	1.18167	0.926668	0.975916	1.11144	1.05322	0.967678	1.24956	1.30296	1.06019
1459	1.03237	1.31338	1.16274	1.03925	1.02586	0.97322	1.08525	0.871087	0.891663	0.794381
1460	1.9028	1.92879	1.93457	1.95906	1.85409	1.89577	1.95801	2.06907	2.10605	1.64985
1462	-0.763035	-0.393511	-0.617455	-1.31914	-1.00276	-0.434233	0.0785573	0.336946	0.163618	-1.23893
1463	0.507285	0.143163	0.612708	0.100341	0.681208	1.02259	0.622997	-0.362453	-1.04563	-0.205658
1464	-0.815419	-0.601718	-1.36491	-1.39098	-0.964849	-1.46526	-1.28089	0.616641	0.855084	-1.0614
1465	2.10111	1.73892	1.92457	2.08016	1.99875	1.97873	2.09681	1.89357	1.88567	1.2867
1466	1.60794	0.697877	1.40968	1.60286	2.1798	2.01968	1.33266	1.48813	1.56328	1.99638
1468	-0.985145	-0.7094	-0.240009	-0.377122	-0.0122945	0.029775	-0.163129	0.538295	0.510118	-0.136947
1469	-1.47674	-1.21027	-1.62684	-1.29785	-1.33188	-1.05362	-0.999069	-1.57888	-0.050939	-0.840333
1470	-0.0318111	0.202551	-0.204422	-0.0880829	0.222643	0.125792	0.329905	-0.483375	0.0909415	-0.270443
1471	2.35025	2.61887	2.10125	2.3831	2.32936	2.35347	2.39467	1.73053	1.87156	2.40124
1472	0.0366898	0.160457	-0.995029	0.168359	-0.138924	-0.0737529	-0.230312	-0.340941	0.150852	-0.128316
1473	-0.625769	-0.783994	-1.21642	-1.27534	-0.654084	-0.588822	-1.76966	-1.50926	-1.06068	-1.11263
1474	-0.121333	-0.365639	-0.229822	-0.171445	-1.53527	-0.108732	-0.105587	-0.107909	-0.104167	-0.354942
1475	-0.477424	-0.512916	-0.264622	-0.315994	-0.441238	-0.187211	-0.255157	-0.708362	-0.574278	-0.809497
1476	2.18475	1.84205	2.11417	1.99914	2.05129	2.04715	2.16882	1.9388	1.96704	1.79199
1477	0.315799	0.395176	0.333787	0.323432	0.154757	0.349293	0.329448	0.760517	0.844676	0.235987
1478	0.286939	0.35318	0.335351	0.507603	0.329652	0.401767	0.247089	0.876989	1.00569	0.613786
1479	1.22538	1.07963	1.08864	1.22445	1.03511	1.19396	1.09923	1.46706	1.27135	1.13909
1482	-0.367757	-1.17905	-0.888692	-0.711628	-0.873475	-0.657522	-0.227186	-0.427945	-0.126466	-1.34585
1486	0.137547	-0.00382625	0.211855	0.178292	0.224659	-0.0831164	0.333517	-0.129699	0.0657836	0.575205
1487	0.241328	-0.262667	-0.0797298	-0.459113	-0.0377057	-0.235697	-0.293172	-0.73055	-0.966648	-0.66571
1488	1.23225	0.844558	1.12429	1.39603	1.17261	1.14118	1.12663	1.51092	1.43999	0.810211
1489	-0.784956	-0.943039	0.117892	0.419345	-0.186031	-0.177315	-0.533062	-0.145845	-0.181436	-1.15703
1490	0.301531	0.524898	-0.587956	-0.0511747	-0.322789	0.351915	0.686845	1.37054	1.91278	2.36661
1491	-0.0504596	-0.181136	-0.413214	-0.0594283	-0.102886	-0.116194	-0.0984747	-0.378514	-0.0160936	-0.0792044
1493	-1.13577	-1.14962	-0.961248	-1.16826	-0.628685	-1.21417	-0.798528	-1.73332	-1.03802	-0.605992
1495	0.424614	0.41935	0.123881	0.867404	0.69852	0.688965	0.491597	1.30152	1.26467	-1.85807
1496	0.868241	0.947318	0.686884	0.413561	0.508292	0.759818	0.725984	-0.760954	-0.432905	0.405219
1497	0.254856	0.507611	0.286858	0.190223	0.39153	0.123641	0.0129624	0.461667	0.498912	0.103953
1499	-0.228517	-0.639651	0.039897	-0.238284	-0.309498	0.0959811	0.0632493	-0.33141	-0.0676524	-0.358607
1500	0.924256	0.808735	0.783852	0.88394	0.966531	0.96856	0.883949	1.05882	1.08379	0.559193
1501	-0.739057	-0.242174	-0.542737	-0.563604	-0.34236	-0.326547	-0.350718	-0.970816	-0.408733	-0.393176
1503	0.561002	0.176505	0.849343	0.300203	0.330108	0.60717	0.432632	1.49295	1.55207	0.604885
1504	NA	NA	NA	NA	NA	NA	NA	NA	NA	NA
1506	-1.0831	-0.976984	-0.155755	-0.136646	-0.224016	-0.933383	-0.311958	-0.711999	-0.298755	-0.47542
1508	1.8399	1.32318	1.73393	1.54513	1.57586	1.849	1.86053	2.07547	2.29287	1.78606
1509	1.26127	0.525387	1.21435	0.893116	0.773816	1.26232	1.18085	0.798466	0.838421	1.32612
1510	-0.0494561	-0.829498	-0.220808	-0.183481	-0.0567608	-0.39208	-0.135422	-0.473993	-0.371353	-0.400225
1511	-0.336822	-0.481725	0.00195119	-0.286256	-0.123521	-0.562446	-0.614751	-0.708071	-0.239875	-0.39409
1512	1.57088	0.738215	1.32733	1.06401	1.06235	1.36232	1.2936	0.878745	0.604871	2.3651
1513	0.509306	0.424093	0.788049	0.173527	0.591634	0.600508	0.738228	1.2102	1.09472	0.563899
1514	1.65235	1.58589	1.61383	1.4928	1.4823	1.63865	1.56819	1.45645	1.56156	1.97957
1515	1.60535	0.599788	1.44498	1.09307	0.820109	1.70837	1.09467	0.716103	0.517171	0.221572
1518	0.473583	0.351016	0.387634	0.361051	0.423413	0.457359	0.422204	0.225408	0.302857	0.681722
1519	1.17873	0.779898	1.38706	1.06774	1.23349	1.1004	1.37413	0.923441	0.971948	1.11921
1520	-0.42069	-0.552034	-0.538091	-0.140128	-0.181175	-0.914534	-0.241087	-0.308526	-0.299381	-0.217585
1521	-1.2268	-1.41024	-0.920219	-1.42483	-1.08048	-1.30587	-0.969204	-1.12708	-1.31736	-1.66099
1522	-0.388695	-0.842411	0.27632	0.359393	0.0486066	0.377754	0.448682	0.298056	0.47151	0.0975755
1523	0.440421	0.449521	0.307426	0.756212	0.395196	0.487209	0.206659	0.501193	0.601116	0.457539
1524	-0.795188	-0.298284	-1.06797	-1.49204	-0.542006	-0.294199	-1.00219	-1.38891	-0.488437	-1.06015
1525	-0.170671	0.11582	-0.204865	-0.298741	0.298565	0.0504167	0.0659029	-0.00677776	-0.192798	-0.052703
1527	-1.2674	-1.68406	-1.45778	-1.64666	-1.227	-0.724388	-1.21721	-0.875082	-1.59891	-1.77846
1528	1.175	1.13828	1.38568	1.51345	1.58697	1.34787	1.28934	1.30306	1.24365	0.789801
1534	1.68142	1.59253	1.18892	1.54064	1.02911	1.70641	1.34251	0.287625	0.508315	1.76509
1535	0.509761	0.298439	0.55025	0.786801	0.270163	0.45564	0.833782	1.01243	1.10128	-0.0132434
1536	0.096383	-0.376364	0.0117553	-0.309798	0.127723	-0.179906	-0.00248651	-0.739627	-0.486679	-0.614477
1537	1.6797	1.21173	1.72943	1.67894	1.57707	1.75348	1.79924	1.78829	1.80794	1.65566
1538	-2.41819	-2.64948	-1.17439	-1.66099	-1.5889	-1.88384	-1.2656	-2.29204	-1.81494	-2.04143
1539	-0.78786	-0.757996	-0.499423	-0.791446	-0.14441	-0.723038	-0.284237	-0.915408	-0.388089	-0.424983
1540	1.39796	1.62696	1.48044	1.4603	1.43432	1.44127	1.30366	0.62565	0.821318	1.28039
1543	-1.02071	-1.22687	-0.386569	-0.611144	-0.662785	-0.916964	-0.776939	-0.951608	-0.661396	-1.14057
1544	0.592273	0.338679	0.583707	0.482174	0.656269	0.301283	0.482472	0.184737	0.21546	0.504948
1545	-0.636687	-1.06597	-1.20853	-1.89856	-1.50118	-1.94977	-1.38653	-1.32353	-1.13631	-1.94199
1548	0.0399446	-0.0301874	0.0873662	-0.149527	0.245001	-0.0679807	0.195935	-0.599032	-0.0741485	-0.236263
1549	-0.177784	-1.016	-0.662801	-0.975487	-0.487005	-0.37552	-0.663445	-0.253984	0.0633242	-0.937994
1550	-1.03958	-1.41587	-1.14803	-1.04083	-1.03529	-0.982679	-1.11041	-0.61113	-0.339702	-1.85784
1551	-0.561261	-1.70783	-1.06967	-0.871984	-0.395028	-0.277185	-0.483302	-0.78958	-1.38537	-0.667637
1553	-0.966863	-0.975135	-0.28462	-0.495703	-0.283593	-0.718837	-0.22695	-0.809397	-0.492344	-1.35922
1555	-0.155346	-0.711507	-0.0533773	-0.718176	-0.709303	-0.793505	-0.973393	-1.43714	-1.17897	-0.228389
1556	0.0440107	-0.218664	-0.442375	0.106865	0.129454	-0.0422337	-0.0881628	-0.503002	-0.554899	-0.491079
1557	-0.17284	-0.27937	-0.30115	-0.116317	-0.259466	-0.613886	-0.326415	-1.34236	-0.515874	-0.348379
1558	-0.128638	-1.06916	-0.513516	-0.130123	0.0316703	-0.295627	-0.0394733	-1.39646	-1.54507	-0.0249239
1559	-0.11744	-0.273451	-0.0418796	-0.0537957	-0.101838	-0.281483	-0.548024	-0.269264	-0.241407	-0.342372
1562	-0.465945	-1.39886	-0.14828	-1.09783	0.196886	-0.0591502	-0.124928	-1.74371	-0.235384	-0.969658
1564	NA	NA	NA	NA	NA	NA	NA	NA	NA	NA
1565	0.192365	0.0895169	0.160043	-0.0805985	-0.225332	0.152993	-0.495921	-0.200114	-0.00185891	0.436353
1571	-0.762644	-0.715585	-0.526878	-0.296854	-0.447389	-0.53948	-0.430676	-0.874658	-0.400163	-0.571253
1572	-0.645199	-1.107	-1.37216	-0.710737	-1.43212	-1.27134	-0.489669	-0.729193	-1.29986	-1.15019
1573	-1.42253	-0.888498	-0.57985	-1.37837	-1.06066	-1.37148	-0.388931	-1.58826	-1.23552	-0.320414
1576	0.405435	0.134754	0.523517	0.105418	0.34341	0.206093	0.332037	-0.171485	-0.0134706	-0.225783
1577	-0.56462	-1.42484	-0.392945	-0.575604	-1.36247	-1.37823	-0.477682	-1.03753	-0.888529	-0.797668
1579	-0.877938	-0.568711	-0.611103	-1.98996	-0.504543	-0.417054	-0.811058	-0.862664	-0.752994	-0.714649
1580	0.0644625	-0.152334	0.0813296	0.0686533	-0.0173558	-0.299413	0.359879	-0.542332	-0.576227	-0.370423
1581	-0.975438	-0.911402	-0.389659	-1.76378	-0.857864	-0.542119	-2.44877	-1.04037	-0.725796	-0.785409
1582	-0.0962623	-0.0292425	0.191785	-0.253468	0.139507	0.0531074	0.296473	-0.45594	-0.398044	-0.292776
1583	-0.0130514	-0.365193	0.0929276	0.508809	1.10933	0.790987	0.327118	-0.412483	-0.0919625	-0.589276
1584	-1.77884	-1.56975	-1.07585	-1.70875	-1.36429	-0.930981	-1.43888	-1.565	-1.29545	-1.88012
1585	-0.801748	-0.828363	-0.615838	-0.589007	-0.180175	-0.727878	-0.916041	-0.844544	-0.865832	-0.97197
1586	-1.54067	-0.811855	-1.54	-0.967608	-0.571366	-0.349385	-0.45221	-1.50575	-1.24627	-1.21145
1587	-1.40651	-0.58192	-0.353054	-0.215332	-0.13997	-0.514358	-0.249043	-0.287662	-0.466344	-0.634849
1588	-1.82083	-1.47642	-1.41228	-2.23681	-1.28953	-2.30602	-0.687406	-2.17851	-2.50704	-1.85625
1589	-1.04702	-0.743039	-0.36017	-0.550437	-0.950359	-1.224	-1.33245	-0.961754	-1.16558	-1.22326
1591	-0.888576	-0.558162	-0.210658	-0.408892	-0.415252	-0.329683	-0.332955	-1.02099	-0.707401	-0.801462
1592	-0.539333	-0.199764	-0.351272	-1.02526	-0.409929	-0.761009	-0.510493	-1.49706	-1.33741	-0.782657
1593	0.957956	-0.798927	0.935502	0.927484	0.951889	0.856763	1.08691	0.289974	0.0280411	0.157615
1594	-0.245664	-0.0101103	0.0156543	0.139994	-0.0616421	-0.0876712	-0.371958	-0.00720215	0.231339	0.0993689
1595	0.920748	0.693922	0.56018	0.956397	0.80698	0.728421	0.836111	0.542854	0.651603	1.37706
1600	-0.116949	-1.3286	-0.126304	-1.47837	-0.15662	-0.433717	0.0829249	-1.8816	-1.73056	-1.43466
1601	-1.98072	-2.01821	-0.844612	-1.05144	-1.08039	-0.621715	-0.681746	-1.25857	-1.92764	-2.00021
1602	1.41747	1.58889	1.31698	1.73041	0.957299	1.52764	1.25692	-1.67626	-1.25237	1.72829
1603	1.79818	2.07283	1.85948	1.88035	1.60048	1.78843	1.95423	1.9864	2.0724	2.19093
1604	1.20032	0.154255	1.09774	1.13713	1.18192	1.04856	1.03431	0.422995	0.563916	0.671816
1605	1.55754	1.21912	1.52005	1.48983	1.46732	1.52477	1.53827	1.71199	1.8009	1.50206
1606	0.0810587	0.0798288	0.362247	0.181962	0.34761	0.389346	0.2219	1.06245	0.959925	0.0560192
1607	-0.596429	-1.99406	-0.576924	-0.538645	-0.173013	-0.552857	-0.774854	-0.993813	-0.405168	-1.66086
1608	-0.973336	-0.00759073	0.347883	-1.16801	-0.0279646	0.024129	0.214851	-0.810832	-1.26628	0.603907
1609	-1.51947	-1.65769	-1.35129	-1.10732	-0.764437	-1.0097	-1.26464	-0.582588	-1.15683	-0.534585
1610	0.118931	-0.0881635	0.248483	0.113533	0.167183	0.037504	0.101814	-0.155032	-0.0638194	0.11188
1611	1.26854	1.76876	0.672655	1.01146	0.601076	0.973789	1.05886	1.76526	1.84485	1.72942
1612	1.59182	1.95941	1.72602	1.09668	1.42582	1.66481	1.5263	0.88662	0.713036	1.70595
1613	0.310287	0.899196	0.36762	0.454695	0.487324	0.541223	0.376269	0.784789	0.959291	0.221975
1615	1.36907	1.60364	1.43435	1.46713	1.38583	1.36924	1.44474	1.61204	1.66717	0.894283
1616	0.558948	0.66592	0.277957	0.585601	0.514132	0.471948	0.420564	0.898808	0.869038	0.429523
1617	NA	NA	NA	NA	NA	NA	NA	NA	NA	NA
1618	-0.749542	-1.77669	-0.357398	-0.820799	-0.462881	-0.627294	-1.25333	-1.29748	-1.05056	-2.1302
1620	-1.35758	-1.50238	-1.32197	-0.851174	-1.36613	-1.19947	-1.72146	-0.80633	-1.78952	-1.35248
1621	-1.29503	-1.46242	-1.28543	-1.38478	-1.24493	-1.0242	-1.2929	-1.59768	-1.29763	-1.1349
1622	2.35993	1.98067	2.21862	2.05734	2.61391	2.28333	2.59446	2.11634	2.20561	2.11523
1627	1.10327	0.860655	1.39861	1.37743	1.21314	1.3746	1.47339	1.53369	1.54474	0.711168
1628	1.01372	1.19813	0.912367	1.49641	1.12488	0.906141	1.37513	0.226824	0.341989	0.882731
1629	0.510674	0.461038	0.518358	0.28147	0.276637	0.431237	0.230868	0.31675	0.143434	-0.338719
1630	-0.339106	-0.14625	0.0801774	-0.131524	-1.59203	0.285183	-0.533647	-0.559741	-0.734836	-0.538373
1632	1.02264	0.95816	1.08801	1.01066	0.914274	1.08044	1.07969	1.19158	1.18104	0.702336
1633	0.690509	0.125245	0.566519	0.680914	0.653648	0.703057	1.00595	0.973006	0.882027	0.575843
1634	0.696007	0.977079	0.422782	1.55033	0.297306	0.605833	1.42217	0.0328245	0.264085	0.763133
1635	0.909081	0.854829	0.723338	1.1293	1.02099	0.952835	0.919323	1.44719	1.46551	0.930973
1636	0.058337	-0.457499	-0.634973	-0.275842	0.286687	-0.161423	-0.307937	-0.466019	-0.302048	-1.50912
1638	-0.253023	-0.684956	-0.336926	-0.622363	-0.374885	-0.347724	-1.14617	-2.15534	-1.18704	-0.460511
1639	1.74047	1.83072	1.72639	1.77204	1.94494	1.84726	1.73415	1.60199	1.52802	1.64
1641	0.705237	0.898176	0.870964	0.750351	1.18484	0.941407	0.546799	-0.833477	-0.652681	-1.0007
1642	1.65679	1.5556	1.6854	1.8045	1.55057	1.61489	1.6733	1.74738	1.63194	1.47933
1643	0.596856	0.534129	-0.109348	0.276224	0.205464	0.0154143	0.525615	1.11082	1.13262	1.00736
1644	-1.04726	-0.150456	-0.860705	-1.95956	0.187121	-0.815273	-0.659597	-1.57559	-0.836693	-0.00752958
1645	-0.818482	-0.76285	-0.712324	-0.524928	-0.169722	-0.79572	-0.993667	-1.69025	-1.20134	-0.9043
1646	-0.823098	-0.76885	-1.33324	-1.92122	-1.41453	-0.947679	-0.49743	-1.28906	-0.875827	-1.79215
1647	1.16682	1.31447	0.984479	0.864676	1.39981	1.11951	1.11121	1.34404	1.15545	0.993208
1649	1.2592	0.784371	1.21766	1.18302	1.35641	0.998823	0.991953	0.197611	0.440797	1.07751
1650	1.6844	1.5498	1.60498	1.49304	1.31601	1.39135	1.55549	1.69174	1.6477	2.22361
1652	0.650677	1.02986	0.538824	0.775839	0.667076	0.738528	0.720652	1.18427	1.2357	0.74959
1653	2.01204	2.1858	2.07423	1.89655	2.05362	2.04049	2.03355	1.82848	1.8519	1.9017
1654	-0.0993056	-0.534993	0.00859246	-0.0824768	0.130854	-0.0803375	0.28134	-0.51283	-0.41328	-0.113813
1655	2.30378	2.3448	2.37502	2.28461	2.33168	2.19892	2.30716	2.25038	2.1569	2.42854
1656	-0.028542	-0.113926	0.095936	-0.407178	0.111871	0.0555937	0.198594	-0.198204	-0.170076	-0.20249
1657	0.840553	1.08141	0.838991	0.866676	0.769227	0.752094	0.848909	0.46508	0.159065	1.09509
1659	0.400531	0.695256	0.29588	0.428166	0.133549	0.393239	0.406155	0.939527	0.937457	0.247019
1660	1.1524	1.09987	1.13378	1.20027	1.11139	1.18284	0.893567	1.54198	1.40814	1.10672
1662	-1.66049	-1.54236	-1.34955	-1.57183	-1.63182	-0.69722	-1.43696	-1.44059	-0.88113	-1.54596
1663	0.34343	0.73367	0.367904	0.421034	0.801179	0.391408	0.46381	1.28578	1.11843	0.458906
1665	1.78667	1.82315	1.81845	1.73498	1.72357	1.8543	1.75547	2.12202	2.10257	1.83709
1666	1.29429	0.847558	1.25431	1.3875	1.22641	1.30399	1.12926	1.25219	1.13265	1.09594
1667	NA	NA	NA	NA	NA	NA	NA	NA	NA	NA
1668	NA	NA	NA	NA	NA	NA	NA	NA	NA	NA
1669	-0.543972	-1.20921	-0.95009	-0.572195	-0.220441	-0.543602	-0.565784	-1.14786	-0.929356	-1.28947
1670	-0.330093	-0.807802	-0.0510644	-0.582963	-0.151589	-0.322195	-0.239456	-0.602591	-0.445212	-0.699269
1671	-0.889193	-1.28374	-1.01033	-0.960749	-1.28866	-1.62979	-1.03729	-1.242	-1.03815	-1.34725
1672	-0.615425	-0.486008	-0.11701	-0.702028	-0.115238	-0.619197	0.151916	-0.443336	-0.645823	-0.180777
1673	-0.959546	-0.874034	-0.737218	-0.882463	-0.715225	-0.328191	-0.820108	-0.360074	-0.177743	-1.05312
1674	-0.386509	-0.271855	-0.765261	-0.0555784	-0.416734	-0.117223	-0.291044	0.016304	-0.0638341	-0.103258
1675	-0.121433	0.0555194	0.0550875	-1.09128	-0.59061	-0.59086	0.287013	-0.568711	-0.651531	-1.29712
1676	0.90823	0.700229	0.950635	0.955873	1.21682	1.14841	1.04265	1.17671	1.19121	0.657529
1677	0.0964323	-0.100707	-0.0198025	0.144266	0.0905814	0.0232718	-0.301805	0.174698	-0.141368	0.193087
1678	0.299848	0.137539	0.388149	0.116891	0.156373	0.378482	0.287269	0.250971	-0.076716	0.0381211
1687	-0.192177	0.28843	-0.465699	-0.159373	-0.451139	-0.337362	0.100332	1.40512	1.43508	-0.0832028
1690	1.28355	1.54254	1.61746	1.50072	1.71768	1.56942	1.5341	1.62065	1.62635	2.05826
1716	1.13531	1.37092	0.956302	1.11124	0.936397	1.08729	1.07909	0.977185	0.894244	1.09774
1717	0.936861	0.139786	0.609495	0.672075	0.880273	0.906022	0.743761	0.755964	0.977812	0.947014
1718	1.5405	0.750966	1.89397	0.97629	1.45152	1.7866	1.0114	1.61596	1.87239	0.186005
1719	0.632513	0.508693	0.621808	0.621409	0.729481	0.469895	0.716593	1.21746	1.08764	0.103156
1720	-0.58307	-1.43125	-0.912527	-1.95507	-0.630198	-1.16384	-1.37127	-1.76516	-0.777968	-3.12604
1723	-0.234842	-0.232941	-0.20049	-0.20094	0.0471067	-0.042411	0.0843115	-0.318037	-0.458401	-0.166199
1725	1.26327	1.29877	1.25831	1.36945	1.18044	1.23422	1.34743	0.836497	0.866939	1.43688
1727	1.60586	1.61909	1.67664	1.64964	1.59609	1.76856	1.7414	1.69614	1.76962	1.31894
1728	-0.155698	0.466012	-0.487974	-0.108031	0.208199	-0.661912	0.0328799	0.807564	0.508744	-1.05579
1729	1.00297	1.68943	0.786103	0.990267	0.693428	1.07149	0.592506	1.48071	1.41287	1.0939
1730	0.178153	-0.236974	-0.256733	-0.368322	0.316462	0.176369	0.334279	0.327244	0.34982	0.203013
1731	0.261735	0.0626616	0.0414042	0.120292	0.240227	-0.0488838	0.0316323	-0.475188	-0.456397	-0.757787
1733	-0.885264	-0.916538	-0.570872	-0.710734	-0.694157	-1.28509	-0.652546	-2.02314	-0.865604	-0.688137
1734	2.03747	1.39211	2.04073	1.32356	1.19991	1.61725	1.25455	-0.605585	-0.474576	2.4963
1735	-0.795975	-1.13061	0.218541	-0.0377859	-0.221758	-0.494597	-0.326058	-0.826632	-1.0612	-0.225205
1736	1.13138	1.52511	1.15224	1.27463	1.14622	1.19975	1.10637	1.58322	1.51918	1.07518
1737	0.829787	0.428313	0.7613	0.928593	1.00072	0.950562	0.803035	0.930473	1.06907	0.449788
1738	1.53488	1.78232	1.62513	1.63653	1.63916	1.59448	1.51351	1.57686	1.42294	1.53807
1739	1.20117	1.32225	1.06335	1.34331	1.29374	1.12792	1.21736	1.3296	1.19064	0.66891
1740	0.46114	-0.0971949	0.492342	0.5277	0.247778	0.304324	0.451871	-1.02955	-1.57477	-0.0322399
1741	0.395585	0.870255	0.641352	0.276277	-0.0705879	0.481309	0.745168	0.251691	0.33111	0.0717578
1742	0.887549	0.461012	0.695912	0.617805	0.649076	0.85721	0.891954	0.135538	0.17676	0.0417476
1743	0.678942	0.93971	0.836739	0.867618	0.825958	1.05072	0.9549	1.15892	1.14598	0.49589
1745	-0.349261	-1.40993	-0.123224	-1.09011	-0.859783	-1.55769	-1.17171	-0.739456	-0.969169	-0.0497185
1746	-0.31896	-1.81404	-1.1868	-1.68984	-1.21165	-1.14833	-1.62039	-0.424396	-1.00994	-1.66575
1747	-0.927381	-0.59699	-0.565585	-0.655014	-0.956744	-1.27799	-0.463897	-1.42557	-0.417249	-0.777254
1748	-0.297838	-0.67312	-0.42435	-0.601521	-0.915063	-0.230975	-0.245938	-0.185656	-0.360443	-0.389513
1749	-1.87444	-1.21564	-1.6832	-1.77621	-1.15295	-1.44241	-0.462589	-2.26919	-0.821661	-1.87162
1750	-1.44388	-1.35183	-0.98255	-1.28677	-0.925085	-1.18024	-1.37598	-1.68364	-1.33557	-1.88015
1755	0.0358646	-0.0661824	-0.920639	-0.0109922	0.119301	-0.169199	0.0916492	0.384775	0.392365	-0.0131511
1756	-0.611344	-0.0635699	0.171358	0.159623	0.0775192	-0.144648	0.0253128	-0.265284	-0.493865	0.582378
1757	-0.846734	-1.63846	-0.532726	-1.02928	-1.08997	-0.742823	-1.41569	-1.77186	-1.23039	-1.5733
1758	-1.04342	-1.54658	-1.89283	-1.79971	-1.42928	-1.32812	-1.53499	-2.03208	-0.913098	-0.514646
1759	1.40773	1.30055	1.27678	1.54698	1.40369	1.35342	1.23834	1.43942	1.44454	1.63972
1760	-1.19213	-1.12351	-0.961776	-0.918413	-1.09771	-1.3221	-0.67666	-1.34527	-1.3307	-1.54477
1761	-1.16301	-1.044	-1.18389	-0.976855	-1.42747	-0.99285	-1.59207	-0.827964	-0.45114	-1.24914
1762	0.969312	0.738875	1.06063	1.05201	0.993042	1.07882	1.01499	0.782802	0.720074	0.769675
1763	-0.590456	-0.664543	-0.375585	-0.167412	-0.167399	-0.842053	-0.141735	0.737429	0.353973	-0.382867
1767	0.103491	0.774233	0.26733	0.272874	0.257131	0.214009	0.469022	-0.224392	-0.0964226	-0.665027
1768	-0.291002	-0.463362	-0.329981	-0.453343	-0.357618	-0.277024	-0.665154	-0.777603	-1.73892	-0.774165
1769	-1.67416	-1.89081	-1.08834	-1.25047	-1.57883	-1.3107	-1.45536	-1.49555	-1.44579	-1.68822
1770	-0.185642	-1.24776	-1.24364	-0.831724	-1.03954	-0.558518	-1.02194	-1.20767	-0.847054	-1.56776
1773	0.243217	-0.0927379	0.0462988	-0.00568447	0.0298964	0.155673	0.00198958	-0.203461	0.0767057	0.0246398
1774	0.861277	0.845735	0.752691	0.793843	0.807138	0.848388	0.8137	0.633811	0.634335	0.599964
1775	-1.42537	-1.35578	-1.03964	-0.969875	-1.09645	-0.79094	-1.16042	-1.51407	-1.23723	-1.28481
1776	-1.00898	-1.27285	-0.833776	-0.268861	-0.68108	-1.23388	-0.821589	-1.80559	-1.3797	-1.14443
1777	1.31627	1.14786	1.28197	1.22641	1.16211	1.24549	1.44228	0.887198	0.987395	1.15257
1778	-0.433283	-0.275	0.0132523	-0.0303488	-0.190883	0.135808	-0.423867	-0.167263	-0.150361	0.391053
1780	-0.502617	-0.316185	0.205493	-0.173722	0.20588	-0.632711	-0.293098	-0.570531	-0.434232	-0.356428
1781	1.59063	1.97534	1.73532	1.92803	1.66781	1.76694	1.75181	1.95313	1.90168	1.47747
1783	1.66226	1.83084	1.53238	1.63073	1.63159	1.70443	1.52028	1.39447	1.4506	1.65961
1785	-1.31215	-1.41762	-1.58179	-1.33393	-1.16825	-1.32633	-1.60067	-1.14056	-0.771445	-1.45018
1786	0.720847	0.732935	0.809041	0.84019	0.874551	0.841004	0.762929	1.69658	1.70352	0.839265
1787	-0.25013	-0.075581	0.0929479	0.011168	0.0307926	-0.2338	0.036848	-0.140388	-0.213186	-0.741467
1788	-1.29241	-0.473581	-0.102852	-0.436846	-0.136855	-0.0519498	-0.309798	-0.00470822	-0.209246	-0.593784
1789	0.0715493	-0.137678	0.128792	-0.0118671	0.214099	0.0860388	-0.134573	0.533278	0.361359	-0.15862
1791	-1.96612	-1.78293	-0.610862	-1.06586	-1.63947	-1.06521	-1.48553	-1.75173	-1.72024	-0.613479
1793	0.356018	0.270511	0.425584	0.150296	0.252736	0.214511	0.440583	1.34987	1.40404	-0.138813
1794	-1.88606	-1.60361	-1.10925	-1.99226	-1.61942	-1.73734	-1.74201	-1.88815	-1.93702	-2.07593
1795	1.00697	-0.00897228	0.939577	0.683939	0.992986	0.944533	0.783341	-0.800863	-1.36591	0.705747
1796	-0.0786292	0.132345	-0.836862	-0.271826	0.24644	-0.0330921	0.201499	0.397747	0.349634	-0.533017
1797	-0.624435	0.255671	-0.0605622	0.20071	-0.560508	0.117639	0.0839172	-0.0532683	0.216626	0.688118
1798	0.863444	0.793018	0.75167	0.822001	0.696467	0.86457	0.828438	0.931089	0.952251	0.795569
1800	-0.173453	-1.04963	-1.17029	-0.866366	-0.892797	-0.797649	-0.54475	-1.22526	-1.38429	-0.846797
1801	NA	NA	NA	NA	NA	NA	NA	NA	NA	NA
1802	-0.258194	0.122791	0.160023	0.167962	0.154188	0.298254	0.210498	0.599398	0.486147	0.520564
1803	-1.27952	-1.58561	-0.973849	-1.20304	-1.01913	-1.26326	-1.1061	0.229276	0.624798	-1.62317
1804	-0.177166	-0.484998	-0.753887	-0.412951	-0.713242	-0.354042	-0.455986	-1.22573	-0.540438	-0.383215
1805	-1.40207	-1.03548	-0.988867	-1.3637	-0.298915	-0.308127	-1.33464	-0.73138	-0.437286	-0.523384
1806	-0.153512	-0.667093	-0.172194	-0.45146	0.0387776	-0.173508	-0.0893226	-0.330257	-0.412063	-0.133742
1807	-1.51358	-0.395607	0.00466804	-0.278047	-0.181724	-0.271777	-0.180907	-0.719832	-0.66509	-0.518015
1808	1.95396	1.58911	1.98928	2.14951	1.97264	2.02737	2.14507	1.88344	1.88891	1.98556
1809	0.860272	-0.05075	0.720609	0.753695	0.871349	1.0333	0.86409	0.856339	0.91813	0.0595939
1810	0.627756	0.635222	0.435517	0.65936	0.531508	0.497894	0.637091	1.43951	1.44268	0.775957
1811	-0.469871	-0.956805	-0.823926	-0.375156	-0.308559	-0.183555	-0.663109	-1.18286	-1.53507	-0.762677
1812	-0.430523	-0.622406	-1.06772	-1.59138	-0.00226415	-0.694567	-0.302662	-1.2424	-1.65634	-0.819801
1813	0.970709	0.0104672	0.741415	0.787797	0.829962	0.679042	0.656972	-0.660823	-0.184927	0.0748688
1814	-1.67445	-2.05671	-1.55418	-1.53607	-0.984297	-1.81281	-1.52023	-2.10725	-1.79208	-1.79863
1815	-1.7103	-1.96717	-1.54946	-1.84618	-1.66733	-1.57727	-1.49553	-2.08142	-1.79308	-1.89607
1816	-0.00515287	-0.0194173	0.366797	0.0779818	0.314095	0.074432	0.405201	-0.1863	-0.00664571	-0.152713
1819	0.673484	0.797313	0.673161	0.716722	0.835834	0.7371	0.526694	1.01115	1.04093	0.320931
1820	-0.19055	-0.81366	-0.289332	-0.288472	-0.223452	-0.112166	-0.263801	0.0246231	0.20139	-0.402646
1821	-0.36993	-1.48455	-0.284835	-0.196599	0.0617536	-0.235101	-0.571886	-0.55019	-0.378799	-0.0684879
1822	0.569705	-0.443784	0.59424	0.51594	1.0683	0.603019	0.401989	0.0303455	0.0229949	-0.613385
1823	-1.54678	-1.61634	-1.02016	-1.42151	-1.20072	-1.72076	-1.20996	-2.20969	-1.43919	-2.33228
1824	-1.8255	-0.454046	-1.11413	-0.883529	-1.47394	-1.30583	-1.07283	-1.80646	-2.20132	-0.932685
1825	-0.617364	-0.843056	-1.30057	-0.338057	-0.104052	-0.450199	-0.241466	-0.018397	0.0975716	-0.747012
1826	-0.867797	-0.849237	-0.457253	-0.912499	-0.583984	-0.741683	-0.718604	-1.01044	-1.12991	-0.405611
1827	0.721854	1.06289	0.453506	0.824184	0.671074	0.731454	0.490529	1.21197	1.07161	1.09676
1828	-1.54839	-1.45413	-1.26892	-1.70675	-1.6014	-1.70262	-0.516334	-1.68948	-1.56714	-1.8986
1829	-0.574761	-0.225044	-0.160534	-0.986143	-0.138151	-0.0750844	0.236802	0.906244	0.657237	0.68113
1830	-1.3615	-0.246875	-0.306854	-1.09399	-0.941378	-0.157078	-1.47728	-1.33266	-0.19138	-1.11611
1831	0.216288	0.600548	0.41472	0.36082	0.448741	0.357961	0.392183	-0.706764	-1.07899	0.705948
1832	1.58582	1.3155	1.77873	1.49584	1.62154	1.72354	1.56439	0.947837	1.07267	-0.16876
1833	-0.644556	-0.456877	-1.34575	1.08224	-0.803307	-1.90368	-0.551788	-1.31256	-1.01829	-1.59912
1834	0.23802	-0.0963288	0.230128	0.064336	0.0462594	-0.0137753	0.173634	0.0215154	-0.105579	-0.268554
1836	1.74538	2.29411	2.06937	1.48267	1.38463	1.72401	1.60497	1.01798	1.00423	1.56582
1837	-0.229678	0.564411	0.0881352	-0.0602177	0.123592	0.0666783	-0.117931	-0.0157674	0.016051	0.45084
1838	0.271684	-0.0165792	0.511385	0.211269	0.373834	0.246394	0.384677	-0.192509	-0.73176	-0.122049
1839	-0.353003	-0.286068	-0.0510532	0.292085	0.560316	0.171396	0.331204	0.983122	1.16405	0.416131
1840	0.565851	-0.554186	0.59849	0.765028	0.589754	0.643323	0.556629	-0.520897	-0.273118	-0.690838
1841	-0.0426987	-0.396414	0.164837	-0.0620655	-0.217744	-0.23915	-0.22368	0.288836	0.353855	-0.10068
1842	-1.05347	-1.1549	-0.44213	-0.357482	-1.07656	-0.980888	-1.35001	-0.839656	-0.635512	-1.11849
1843	1.1822	1.83879	1.13852	2.19103	1.55117	1.09443	1.69701	1.51849	1.3751	1.8577
1844	-1.14367	-1.13067	-1.21135	-1.03354	-1.03896	-1.34812	-1.11974	-0.690175	-1.05462	-1.22696
1845	1.3863	1.56804	1.13221	1.46898	1.30469	1.22406	1.37641	1.32832	1.32381	1.53931
1846	-2.18273	-1.2744	-1.27962	-1.88753	-1.09911	-1.19377	-1.02806	0.592011	0.874728	0.260885
1847	-0.225103	-0.305366	-0.218406	-0.265207	-0.244889	-0.00545117	0.0492124	1.77501	1.87417	-0.607437
1848	0.601231	1.82739	-0.0966606	0.882066	0.034415	-0.0914018	0.571623	1.82041	1.96318	1.51124
1849	0.675023	0.390978	0.609501	0.455917	0.569203	0.542049	0.507406	0.72369	0.79018	0.223671
1850	1.10787	0.316063	0.946309	1.41412	1.59054	1.31946	1.06314	-0.0489605	0.0305941	0.691009
1852	-0.562082	-0.803688	-0.47678	-1.71646	-0.0381618	-0.668411	-0.47962	-1.33784	-0.571428	-0.94114
1854	0.665706	0.697551	0.689334	0.962923	0.8654	0.614209	0.820266	1.1933	1.19612	0.52779
1855	0.959778	0.456608	1.09798	0.906601	0.858439	1.01288	0.901653	0.981436	0.980238	0.795575
1856	0.0466229	-0.254777	0.143508	0.0803147	-0.11047	0.00388188	0.0689479	0.63924	0.622498	-0.0305739
1857	0.357054	0.266463	0.475233	0.215387	0.462282	0.563151	0.246757	0.225869	0.187133	-0.444611
1859	1.55669	1.51038	1.61435	1.6523	1.51434	1.62346	1.49771	1.52429	1.48372	1.51004
1861	-1.65	-2.04987	-1.44366	-1.61074	-0.861564	-1.4708	-0.348641	-0.971864	-1.75432	-1.35448
1869	-0.212884	-0.176138	-0.066776	-0.0457119	0.406864	-0.618189	-0.231319	0.530103	0.575869	-0.144508
1870	-0.882958	-1.11941	-0.306019	-0.539594	-0.229006	-0.462228	-0.546186	-0.308315	-0.232215	-0.9659
1871	0.118255	-0.313427	-0.264376	0.0674257	0.25096	0.114733	0.0569124	0.451058	0.4251	-0.0497772
1874	0.496259	0.347785	0.200143	-0.0452704	0.26865	0.185613	0.204879	0.424055	0.367295	-0.595657
1875	0.102993	-0.32503	0.02266	0.0234602	-0.194642	-0.0361764	-0.16587	0.0958786	0.177884	-0.0573629
1876	0.429957	0.826424	0.59653	0.480924	0.394724	0.506373	0.565216	0.823042	0.661453	0.64435
1877	0.270689	0.161181	0.347769	0.352303	0.340782	0.44818	0.238162	0.469225	0.383801	0.430126
1879	-0.896356	-0.0982061	-1.39703	-1.68044	-1.39449	-0.89149	-0.352024	-0.191502	-0.643022	-0.463981
1880	-0.15448	-0.336894	-0.0549045	-0.0556926	-0.0809928	-0.338416	0.162313	-0.542529	-0.71957	-0.870769
1889	0.614614	0.256261	0.922823	0.717771	0.908417	0.734333	0.930139	1.10384	1.47606	0.126791
1890	-0.232175	-0.2274	0.0254709	-0.230847	-0.560156	-0.0794537	0.0164843	-0.215017	-0.296293	-0.688687
1891	1.11045	1.39153	1.09505	1.25475	1.17257	1.03738	1.27132	0.791959	0.930926	0.742013
1892	1.82971	1.58248	1.90364	1.72222	1.69715	1.8451	1.80744	1.96371	1.9817	1.54306
1893	0.139761	0.35087	0.250186	0.100097	0.421294	0.244565	0.395074	1.73141	1.83229	0.183626
1894	-0.0308224	-0.000100353	-0.050445	0.0433414	-0.0949259	0.0970258	0.0200409	1.62001	1.45044	0.0295421
1896	-0.310222	-0.758194	0.0266462	0.197891	0.8584	0.0622062	0.348527	-1.19776	-0.508483	-0.456554
1901	-0.286159	0.353641	-0.361662	0.218327	-0.180384	-0.0940017	0.482132	-0.947683	-0.697429	0.115624
1902	0.463	0.00611588	-0.0201101	0.2301	-8.74429e-05	-0.315938	0.384927	1.08543	1.09106	-0.646465
1903	0.247462	0.854573	0.291842	0.211285	0.124589	-0.0733241	0.675562	0.988775	0.9146	0.183246
1906	-0.902716	-1.36624	-0.85026	-1.17742	-1.32426	-0.448707	-0.854477	-1.54687	-0.297778	-1.09692
1907	-0.847476	-0.0378885	-0.178886	-0.19884	-0.443562	-0.313969	-0.8586	-1.24982	-0.7834	-0.520305
1908	-0.604933	-1.18935	-0.827703	-0.948848	-0.385718	-0.45464	-0.971754	-1.60616	-1.09536	-1.31612
1909	-0.462476	0.0181994	-1.46482	-2.1521	-0.372666	-0.604244	0.230296	-0.549308	-0.183414	-0.921156
1910	-0.210517	0.0112805	-0.307504	-0.300863	-0.21868	-0.441542	0.00291353	-1.94271	-0.184258	-0.621576
1911	1.2064	1.17967	1.36791	1.17182	1.31741	1.1546	1.27773	0.927325	0.750324	1.31649
1912	1.42254	1.02141	1.17745	1.45307	1.23499	1.39081	1.26768	1.86275	1.96083	1.05995
1915	-0.150189	-0.27636	0.143582	-0.165274	0.0870491	0.296107	-0.0444415	-0.0274913	-0.180417	-0.151879
1917	2.28618	2.12003	2.29449	2.45097	2.4939	2.34508	2.18105	0.432115	0.305131	2.5219
1933	2.06835	2.2252	2.04984	2.01774	1.99424	1.97534	2.07246	2.27144	2.20836	2.1126
1936	1.67292	1.64008	1.72479	1.7076	1.76083	1.6556	1.74144	2.13337	2.16171	1.62295
1937	2.50424	2.32591	2.53197	2.41554	2.48175	2.45396	2.53095	2.52708	2.63013	2.34473
1938	2.15945	2.55428	2.35815	2.16595	2.18117	2.2707	2.25607	2.33279	2.36135	2.45953
1939	1.04547	1.41541	1.11687	1.06036	0.964656	0.87179	0.985435	1.17841	1.23084	1.23094
1942	-1.29779	0.392636	-0.520098	-0.16343	-0.171744	-1.29122	-0.319212	0.0136299	0.0378521	-0.416287
1943	-1.54601	-1.86334	-1.24902	-1.61816	-1.29514	-1.20219	-1.15999	-1.95447	-1.40012	-1.58917
1944	1.03613	1.41481	0.750541	0.782572	0.59964	0.94843	0.869178	-0.640274	-1.29429	0.624466
1945	-1.28179	-0.387281	-1.33817	-1.67576	-1.41367	-1.53906	-1.46098	0.0048634	-0.0761112	-2.32726
1946	-1.54488	-1.76811	-0.975226	-1.18656	-1.48127	-0.774369	-1.12579	-1.6274	-1.33001	-1.39421
1947	0.0440654	-0.0503333	-0.304518	0.0760522	0.0916577	-0.053162	-0.266366	0.375954	0.200753	-0.162114
1948	-0.015391	0.831428	1.21169	0.662142	1.0763	1.32929	1.20563	0.983073	1.04539	0.424532
1949	1.25482	0.944067	1.18326	1.25314	1.2761	1.48666	1.14925	0.875458	0.726181	0.29065
1950	-0.467463	-0.855353	-0.374212	-0.421515	-0.946141	-0.862418	-0.259592	-0.696987	-0.581451	-0.310176
1951	0.582324	0.401599	0.640778	0.723268	0.411317	0.538782	0.613176	-0.918573	-0.328004	0.442148
1952	0.916073	0.225968	0.969294	0.89782	0.99623	1.05386	0.826473	0.579258	0.611438	0.728738
1953	-1.44232	-1.42537	-1.46245	-1.55226	-1.31485	-1.43271	-1.35852	-1.0986	-1.53578	-1.8633
1954	0.907437	0.404761	0.738115	0.610536	0.801783	0.781867	0.755362	0.609107	0.407764	0.698578
1955	1.52717	1.27768	1.4554	1.31943	1.36423	1.55472	1.54136	0.912654	0.935268	1.19396
1956	-0.0669368	0.241559	0.163457	-0.0138781	0.233783	0.110287	0.373884	-1.58688	-0.761149	0.623339
1958	0.369898	0.687792	0.552681	0.945678	1.25521	0.642458	0.900353	1.09393	1.24565	0.0769271
1959	-0.591497	-0.359676	-0.114306	-0.0297508	1.47252	-0.130086	0.21361	-1.12777	-0.487667	-1.40802
1960	-0.966285	-0.122208	-0.288096	-0.0980046	1.26715	-0.390987	-0.0132441	-0.286283	-0.630306	-0.945057
1961	0.10137	0.0186937	-0.0484094	0.142995	1.21584	0.159721	0.050108	-1.32353	-0.279956	-0.148665
1962	-0.324922	0.0342931	-0.217897	-0.198228	-0.27127	-0.224163	-0.48207	-0.297145	-0.195996	-0.388476
1964	0.649257	0.713796	0.490644	0.799072	0.61948	0.608865	0.684666	1.08415	0.900984	0.565529
1965	0.458063	1.0812	0.465666	0.641181	0.196792	0.486932	0.528576	1.46095	1.475	1.26559
1967	1.10856	1.17876	1.22233	1.06918	1.06072	0.960165	1.12592	1.3818	1.26778	1.24757
1968	0.525081	0.0234356	0.73112	0.0286809	0.63024	0.374492	0.44754	0.902484	0.857744	0.0425902
1969	-0.227243	-1.23894	-1.36716	-0.348436	-0.320384	-1.21274	-0.0716778	1.61787	1.64175	-0.427642
1973	2.23254	2.45337	2.22743	2.23622	2.18825	2.28803	2.26347	2.56993	2.6034	2.0087
1974	0.0112882	0.182811	-0.45992	-0.081579	0.0689661	0.0222225	-0.219544	0.518024	0.406228	0.0650544
1975	1.90161	2.04036	1.92506	2.0084	2.10933	1.92756	2.03556	1.95241	2.00112	1.77157
1977	1.4502	0.970158	1.26366	1.44176	1.49593	1.43601	1.52095	1.51632	1.42451	1.33727
1978	0.104077	0.488622	-0.568921	-0.165469	0.378203	-0.12844	-0.714334	1.43204	1.51217	0.236545
1979	-0.573447	-1.27986	-0.390192	-0.700641	-1.19452	-0.481924	-1.16175	-0.685458	-0.604703	-0.503778
1981	0.700129	0.649533	0.598568	0.477322	0.610693	0.751245	0.713372	0.940819	1.0704	0.367335
1982	-0.971733	-1.11356	-0.848654	-0.984504	-0.439086	-1.00941	-1.24512	-0.7107	-1.279	-0.460603
1983	1.31551	1.50362	1.19663	1.303	1.26365	1.34592	1.18769	1.69543	1.70927	1.37702
1984	0.994789	0.515053	1.198	0.953952	1.03368	1.27405	0.580235	1.26438	1.32758	0.458343
1990	-1.04468	-1.27089	-0.784986	-1.1734	-1.11927	-1.13004	-0.758821	-1.51834	-1.32779	-1.78771
1991	-1.14213	-1.43628	-0.645741	-0.382	-1.25868	-1.10334	-1.28649	-1.52873	-1.11676	-1.60564
1992	1.33295	1.30382	1.01247	1.29331	1.2163	0.986086	1.2343	0.497524	0.58596	0.78315
1993	-0.275837	-0.477979	-0.108338	-0.245816	0.399594	0.116309	-1.24162	-0.386692	-0.600322	-0.33093
1994	1.68242	1.54403	1.66758	1.36118	1.43235	1.59876	1.56948	2.04427	1.95801	1.25636
1995	-1.44738	-1.23909	-0.473295	0.931936	-0.583549	0.589321	-0.973782	-2.00568	-2.05819	-0.317612
1996	0.431473	1.31484	0.401025	0.661448	0.980352	0.796254	0.605329	-1.33201	-0.428148	1.19673
1997	0.578932	0.535725	0.438903	0.480801	-0.152332	0.392565	0.545355	1.0448	0.924477	-0.105297
1998	1.09868	0.849779	1.16722	1.14153	1.16586	1.1061	0.977536	1.04916	0.907439	1.04922
1999	-1.25245	-0.507447	-1.101	-0.161091	-0.69875	-1.17761	-1.06665	-1.13215	-0.94198	-0.521231
2000	-1.02039	-0.437704	-0.880692	-0.125357	-0.470025	-0.945794	-0.620161	0.584433	0.65199	-1.28563
2001	-1.74233	-1.55879	-1.11546	-1.36948	-1.62559	-1.62578	-1.03854	-0.878177	-2.01195	-1.77251
2002	0.616675	0.594214	0.716522	0.55203	0.811814	0.248383	0.753841	0.946671	1.09046	0.28616
2004	-0.694358	-0.00900286	-0.394865	-0.252665	0.223178	-0.167919	0.00965848	0.433139	0.554608	-0.952086
2005	-0.675243	-0.557684	-0.585528	-0.658837	-0.994022	-0.431663	-0.535123	-0.303341	-0.494932	-1.37234
2006	-0.87752	-0.0829034	-0.505731	-0.92769	-0.322027	-0.428621	-0.535109	-1.34291	-1.10881	-1.14752
2009	0.431454	0.405472	0.368581	0.597222	0.401506	0.26974	0.320539	-0.0980261	0.00324332	0.38294
2010	0.797643	0.699206	1.03599	0.870955	0.977628	0.902966	0.954833	0.484795	0.452484	0.493575
2011	-0.628629	-1.03465	-0.621298	-0.950058	-0.127193	-0.981163	-0.840814	-1.097	-1.11969	-1.43003
2012	-0.467227	-0.818601	-0.576392	-0.775586	-1.50899	-0.489652	-0.672219	0.0058599	0.0161216	-0.637078
2013	-0.889643	-0.0433113	-1.22688	-0.321291	-1.08739	-0.557524	-0.793962	0.756165	0.91049	0.986096
2014	0.364869	0.244185	-0.599289	0.0189751	0.0632454	0.146781	0.80991	1.90766	1.83088	-0.279373
2015	-0.22787	-0.881167	-0.849239	-0.928031	0.23258	-0.933494	0.469738	0.550626	0.639912	-0.269113
2016	-1.80715	-1.95022	-1.49945	-1.14566	-1.22559	-1.6602	-1.00504	-1.65861	-1.82901	-1.19663
2017	-1.52364	-1.0235	-1.2445	-1.48013	-0.909391	-1.25838	-0.605022	-0.929006	-0.753592	-1.99224
2018	-0.843474	-0.593591	-0.778603	-1.60391	-0.779108	-1.15791	-1.08085	-1.83718	-1.90239	-0.847695
2019	-1.1222	-1.00675	-0.129826	-1.048	-0.239693	-0.339211	-0.388476	-0.455838	-0.323275	-0.657058
2020	-1.5312	-1.58467	-1.37774	-1.31451	-1.12009	-1.11527	-0.825847	-1.93222	-1.656	-0.628039
2021	0.391915	0.650428	0.645057	0.653527	0.278788	0.435503	0.37431	0.455341	0.355122	0.540386
2022	-1.33644	-1.55825	-0.724738	-1.25308	-1.17174	-1.02904	-0.0348113	0.24496	0.202563	-1.41443
2023	1.59513	1.62019	1.54734	1.72224	1.63292	1.63938	1.6174	2.51097	2.6197	1.64616
2026	2.46076	1.51584	2.40572	2.29631	2.58456	2.48905	2.4657	1.68286	1.709	1.86925
2027	-0.331301	-0.628243	-0.248515	-0.79294	-0.915684	-0.369554	-0.585393	-0.31533	0.0553488	-1.15432
2028	-0.898594	-0.28109	-1.01987	-2.01809	-0.419747	-0.913632	-1.02434	-1.58935	-1.2775	-0.48766
2029	1.67262	1.48968	1.6477	1.81287	1.57009	1.70421	1.61637	1.85396	1.71024	1.70705
2030	1.37152	0.848009	1.25773	1.18613	1.38962	1.29117	1.3841	1.06693	1.11979	1.2045
2033	0.505694	0.856653	0.584878	0.678973	0.891729	0.654262	0.911404	0.601247	0.503649	0.454479
2034	1.44359	1.69391	1.57988	1.37304	1.57945	1.6974	1.73415	1.89818	1.87006	1.15836
2035	-0.482391	-1.57208	-0.177638	-0.733798	-0.454198	-0.404551	-0.23127	-1.35565	-1.08951	0.0905086
2036	0.614578	0.356896	0.746552	0.770563	1.01641	0.892957	0.658921	0.356396	0.307572	0.613294
2037	0.653358	0.218016	0.605435	0.735891	0.836627	0.58922	0.751754	1.22331	1.22937	0.349727
2038	-1.22054	-1.32045	-0.906077	-1.3002	-1.1735	-1.06632	-0.861671	-1.91573	-1.51317	-1.31048
2039	1.34457	1.15684	1.43996	1.47832	1.52922	1.52613	1.56768	0.283457	-0.00505009	1.11121
2040	1.57014	1.54033	1.55991	1.30494	1.46307	1.56299	1.56091	1.49681	1.43333	0.671583
2041	0.365826	-0.251241	0.367582	0.45823	0.574297	0.392944	0.415482	-1.2786	-1.26851	-0.185654
2042	0.165614	-0.190467	0.0485414	-1.86544	-1.91159	-1.33959	0.243902	-2.64115	-1.9387	0.684243
2043	-1.73099	-1.82915	-0.922624	-1.5758	-1.21113	-1.49163	-1.31476	-0.81862	-1.00779	0.785105
2044	-0.810364	-0.832345	-0.33364	-1.06698	-0.506699	0.523813	0.519299	-0.477026	-0.433287	-0.847418
2045	0.038677	-0.573599	-0.274205	-0.27331	-0.59435	-0.285055	-0.238886	-1.0145	-1.46097	-0.246359
2046	-0.323209	-0.265945	-0.453793	-0.125752	0.0679461	-0.746422	-1.39945	-1.63782	-1.79058	0.517933
2047	0.689174	0.0809162	0.491182	0.348257	1.04797	0.929294	0.690961	-1.11336	-1.5489	0.257984
2048	0.0998538	-0.0743721	-0.228026	-0.140265	0.0082865	-0.085324	-0.536534	0.0841127	0.0166781	-0.079356
2049	-1.12011	-0.615	-1.09363	-0.257486	-1.11156	-0.405084	-0.382465	0.298203	0.0735478	-1.19124
2050	-0.125087	0.265449	0.0232587	-0.140654	-0.834732	0.078892	0.264769	1.11955	0.951945	-0.308965
2051	1.19512	0.1627	1.50292	1.14374	1.97512	1.41913	1.38438	-0.169378	-0.210061	-0.177426
2052	1.45056	1.1829	1.3868	1.45178	1.58448	1.24252	1.42762	1.20393	1.16991	0.308483
2053	1.23711	1.44107	1.10621	1.02095	0.738534	1.11609	0.868235	-1.79739	-1.4208	1.69114
2054	-0.316724	-0.00223501	0.0327015	-0.280814	-0.441419	-0.141682	-0.344677	0.32665	0.543703	-0.917094
2055	-0.118378	0.362438	0.142669	-0.125198	-0.0254076	0.0549734	-0.0829666	0.0571396	0.00202955	-0.15742
2056	-0.0343611	-0.363398	-0.295559	-0.531825	-0.589729	-0.579571	-0.141096	-0.615195	-0.713435	-0.4055
2057	0.694227	0.677736	0.581274	0.507176	0.719105	0.517363	0.585178	0.237526	0.524524	-0.0228992
2058	0.917955	0.783222	0.912764	0.801129	0.85449	0.925551	0.778674	0.919794	0.89102	0.822789
2059	1.72828	1.03047	1.62426	1.36309	1.40173	1.644	1.7862	1.45812	1.38751	2.00137
2060	1.1765	0.583135	1.2907	1.10499	1.27843	1.44902	1.22402	0.713524	0.484438	0.679295
2063	-0.637742	-0.836339	-0.776693	-1.07363	-0.453861	-0.411219	-0.813824	-0.279517	-0.279949	-1.44969
2064	-1.46886	-0.583093	-1.54107	-0.249507	-0.495074	-0.42357	-0.201033	-0.129883	-0.148843	-1.73427
2065	-0.344484	-0.490041	0.0340105	0.0714143	-0.0453198	-0.109018	-0.0545874	-1.21159	-0.331716	-0.512962
2066	-0.0798474	-0.296848	0.0642935	-0.457262	-0.360556	0.43153	-0.151994	-0.825584	-0.447193	0.24651
2067	0.93113	1.11419	1.0958	0.868652	0.745085	0.960517	1.05195	1.01482	0.946126	1.06663
2068	-0.644063	0.566697	0.120441	-0.0631827	-0.512533	0.4183	-0.826401	0.410765	0.630918	0.675431
2069	-0.500652	-0.971589	-0.564665	-0.685736	-0.188193	-0.614094	-1.19249	-1.74539	-1.64316	-0.355326
2070	-2.05495	-2.14746	-1.52707	-0.947327	-1.06175	-1.93265	-0.438427	-1.87268	-2.10097	-2.19615
2071	1.10812	1.16089	0.863911	1.06469	0.986285	1.10705	0.944719	1.10975	1.00191	0.84894
2072	0.265679	0.034846	0.230403	-0.263693	0.488698	-0.0202383	0.146273	-0.786398	-0.33501	0.0293966
2073	0.797332	1.02296	0.772169	0.904332	0.603374	0.88491	0.751373	0.618841	0.590381	1.18587
2074	NA	NA	NA	NA	NA	NA	NA	NA	NA	NA
2077	0.579307	0.808445	0.758006	0.739969	0.885392	0.595487	0.778724	0.409037	0.700029	0.364287
2078	-0.409574	0.0905921	-1.02212	-1.04886	-0.18784	-0.262537	-0.00510464	-2.13214	-1.45459	0.0966352
2079	2.34885	2.29467	2.32311	2.33991	2.26419	2.2611	2.37372	2.33712	2.26269	2.45659
2081	-0.207604	0.045834	-0.248522	-0.12123	0.134561	0.101421	0.089916	-0.599387	0.0458463	-0.174556
2086	NA	NA	NA	NA	NA	NA	NA	NA	NA	NA
2091	1.6282	1.8628	1.87158	1.71623	1.74972	1.5727	1.71098	2.10284	2.14811	1.4971
2098	2.08557	2.07602	1.96681	1.99396	1.72257	2.0376	2.05554	1.90539	1.88228	1.83681
2099	0.0478629	-0.584888	-0.195048	0.429294	0.938727	-0.0695649	0.129813	-1.39491	-0.568506	-0.341727
2100	-1.15767	-0.726243	-0.865277	-0.239374	-0.562375	-0.380979	-0.0243976	-0.63379	-1.3748	-0.350074
2101	0.474991	0.584757	0.4624	0.527125	0.545593	0.453973	0.523237	0.495161	0.477499	0.398629
2103	-1.03076	-1.75491	-0.298022	-0.601861	-0.944926	-1.33704	-1.3055	-1.7341	-0.733897	-0.729646
2104	0.163911	0.553868	0.289001	-0.223609	-0.00329594	-0.0419028	0.0198595	-0.849738	-0.562532	0.576488
2107	0.792787	0.886845	0.800405	0.857695	0.666292	0.789547	0.874371	1.51448	1.52611	0.893343
2108	1.36652	1.13027	1.3088	1.38814	1.36838	1.39111	1.24961	1.72503	1.70676	1.374
2109	1.67288	1.72136	1.66466	1.45453	1.32439	1.56429	1.48306	1.0311	0.976304	1.00501
2110	0.0616137	0.068344	0.0485644	-0.110926	0.06579	-0.018508	-0.106257	0.185458	0.146395	0.530925
2113	-0.618867	-0.487555	-0.795057	-0.511907	-0.770147	-1.33901	-1.06316	0.907174	0.985826	-0.983688
2114	0.501805	0.204877	0.0778278	0.76862	-0.0354586	0.284165	0.363402	1.43509	1.39111	-0.00411221
2115	-0.100743	0.848314	0.195992	0.163924	0.176804	0.209726	0.246618	0.556128	0.697423	0.271898
2116	-0.379172	-0.157404	-0.332403	-0.146301	-0.427042	-0.202093	-0.146207	-0.483451	-0.416016	-0.96196
2117	0.0103771	-0.267808	0.208092	-0.052513	0.446499	0.00969592	0.00647416	0.149219	-0.0435064	-0.168863
2118	-0.774842	-1.08234	-0.9214	-0.0262125	-0.827254	-0.702291	-0.798662	0.715982	0.850447	-0.823313
2119	0.967149	1.41604	0.741197	0.555374	0.128067	0.516322	0.803411	1.32958	1.37868	1.30968
2120	-0.0387366	-0.337882	-0.942499	-0.00919115	-0.0160362	0.0133331	0.0733004	0.345983	0.415905	-0.377759
2121	-0.812066	-1.07799	-0.698071	-1.04278	-0.675342	-0.943805	-0.756248	0.223841	0.221592	-1.2909
2122	-1.37384	-2.09022	-1.48267	-1.75293	-1.62031	-1.35367	-1.74687	-0.686068	-1.88256	-1.47447
2123	0.133052	-0.326466	0.115521	-0.0739539	-0.326915	0.00340536	0.320432	0.59369	0.520929	-0.39712
2124	0.0486395	-0.416971	-0.405312	-0.581673	-0.675408	-0.179956	0.150764	0.146362	-0.109204	-0.522151
2125	0.0406235	-1.06883	0.425295	-1.03835	-0.758705	0.271025	0.0337506	-1.10951	-0.232303	-0.354838
2128	-0.629428	-0.775393	-0.591525	-0.871843	-0.631463	-0.476538	-0.656451	-0.920239	-0.61733	-0.705954
2130	1.39185	1.25734	1.34906	1.43331	1.42893	1.39497	1.36896	1.61639	1.53045	1.27376
2131	0.582793	0.561912	0.843444	0.541733	0.72313	0.912393	0.982352	1.46342	1.67124	1.00395
2132	1.23444	0.855026	1.25483	1.09907	0.861069	1.3536	1.25271	1.3639	1.33716	1.24368
2134	-0.258913	-0.869873	-0.808073	-0.664069	-1.20166	-0.970756	0.276682	-0.442116	-0.470202	0.407087
2135	1.29817	1.03002	1.43583	1.47211	1.37451	1.4998	1.51493	1.37714	1.41034	1.23984
2137	0.406573	0.367083	0.381049	0.422237	0.566721	0.683238	0.418684	0.458401	0.530352	0.586276
2138	0.547923	-0.0529321	0.115887	1.08825	1.31875	0.85083	0.864885	-1.49952	-1.40545	-0.477025
2139	-0.639889	0.0162169	-1.17542	-0.264587	-0.263114	-1.25365	-1.19084	-0.388625	-1.09131	-1.53713
2140	0.0288634	-0.434587	-0.0360419	0.320114	0.293478	0.189707	-0.178249	0.258486	0.264108	-0.133803
2145	1.01441	0.56699	0.984389	1.03006	0.963123	0.909987	0.885981	0.258177	0.420596	0.8018
2146	-0.210567	-0.0135887	-1.71341	-0.788304	-1.31186	-0.752285	-1.25125	1.0033	0.826451	-0.86112
2147	-0.462806	-1.13956	-0.569841	-1.25784	-0.877568	-1.05909	-0.744094	-1.21461	-1.55222	-1.61566
2149	0.228122	-0.117341	0.238192	0.114615	0.123729	0.163044	0.280983	0.249381	-0.0506093	-0.198879
2150	0.411974	-0.0382625	0.133829	0.102247	0.306187	-0.0615549	0.433235	0.291772	0.500494	-1.44459
2151	-1.41889	-0.548448	-0.458944	-0.944601	-0.364464	-1.54631	-1.14829	-1.11764	-1.49082	-0.627571
2152	0.633361	1.18745	0.4681	1.05724	-0.650868	0.0419001	0.714302	1.03988	0.916642	0.43175
2153	0.00304621	-0.565882	-0.342248	-0.105937	-0.20015	0.143504	0.145097	-1.30456	-1.18547	-0.306533
2155	0.0405397	0.0923628	-0.036637	0.031297	0.31411	0.0591441	0.155607	-0.14876	-0.136467	0.0749055
2157	0.61028	0.859722	0.570848	0.890523	0.901944	0.73869	0.864076	0.341542	0.281797	0.339483
2158	-0.256184	-0.440379	-0.288507	-0.3728	-0.217052	-0.25021	-0.331157	-1.10456	-0.757191	-0.795601
2159	-0.301471	-0.453466	-0.3323	-0.284426	-0.28891	-1.00528	-0.119115	-0.521886	-0.649944	-0.89974
2160	-2.29447	-2.64219	-1.55176	-2.29818	-2.20618	-2.11109	-0.899545	-1.93237	-2.33847	-2.02503
2161	-0.843182	0.246824	-0.273084	-0.027356	-0.373483	-0.20056	-0.323676	-0.0957133	0.0706326	-0.339538
2162	-0.0518165	-0.399759	0.100211	-0.195885	0.413424	-0.23308	0.310854	-0.658634	-0.494726	-0.0557762
2165	-1.04421	-1.62126	-0.56342	-1.06682	-0.938913	-1.76123	-1.65112	-1.36767	-1.43159	-1.10535
2166	0.960473	0.30748	1.0184	0.831302	0.90362	0.709901	1.02807	-0.204233	0.00751251	0.717211
2167	-0.639122	-1.36211	-1.21003	-0.359164	-1.36894	-0.510714	-0.959911	-1.44426	-0.604614	-0.782169
2168	-1.67579	-2.05707	-1.76906	-1.87053	-1.77743	-1.71779	-1.65973	-2.28707	-1.52797	-2.36485
2169	-0.635416	-1.37581	-0.193522	-0.19175	0.166062	0.124229	-0.508831	-1.05817	-1.0116	-1.26935
2170	-0.390369	-1.40944	-0.456062	0.0436119	-0.126149	-0.0665088	0.325761	-0.970484	-0.237692	-0.42975
2171	1.7065	1.00069	1.46758	1.4879	1.51028	1.39164	1.5506	1.38172	1.22132	0.726422
2172	-2.10029	-2.29368	-1.55688	-1.75232	-2.01156	-1.16113	-1.63977	-1.74167	-1.63833	-1.47706
2173	-0.586224	-0.275068	-0.0449831	0.563462	-1.4569	-1.42476	0.465523	-0.662248	-1.28862	0.355909
2175	-0.489893	-0.115732	-0.144409	-0.996159	-0.210486	-0.324958	-0.686391	1.01662	0.9485	-0.143327
2176	-0.363433	-1.94358	-1.21179	-1.31073	-0.243144	-0.46048	-0.656034	-0.47971	-0.629223	-0.413467
2177	-0.536945	-0.681188	-0.258328	-0.512019	-0.150757	-0.503007	-0.346785	-0.730481	-0.673614	-0.0159952
2178	0.272481	0.256397	0.377348	0.328394	0.265088	0.542919	0.238245	0.523664	0.570428	-0.185968
2180	0.879064	0.927885	0.821472	0.725025	0.619006	0.791835	0.737348	0.492546	0.388873	1.2278
2181	1.54707	1.62433	1.33388	1.46557	1.13864	1.29777	1.51048	1.24029	1.29012	1.74358
2182	0.0225938	-0.17945	0.176486	-0.219802	0.0555784	0.109609	-0.382661	-0.127282	0.105345	-0.207353
2184	0.343607	0.135742	0.452623	0.454927	0.560061	0.0910472	0.424574	0.623762	0.629722	0.0605709
2185	0.869746	0.475112	1.01625	0.718186	0.8221	0.679874	0.700784	0.0721661	-0.0178436	-0.18994
2186	1.59155	1.58857	1.50684	1.58101	1.52394	1.43412	1.20842	1.42977	1.25667	1.58919
2187	-1.55076	-2.08743	-1.60936	-0.916679	-0.796044	-1.50613	-1.46474	0.0102791	-0.217545	-2.33712
2188	0.504462	0.0391729	0.641976	0.776867	0.292801	0.560008	0.617178	-0.103647	0.109443	0.483255
2189	0.398429	0.323999	0.360484	0.579178	0.638177	0.420676	0.540671	1.43564	1.30304	0.373046
2191	-0.22953	-1.24196	-0.960057	-0.535962	-0.744951	-0.998083	-0.888304	0.631148	1.28593	-0.932169
2192	-0.965881	-0.813828	-0.748594	-1.44101	-1.03185	-0.626718	-0.895469	0.771968	0.686386	-1.23201
2193	0.818768	1.07469	0.881009	0.738201	0.748901	0.905736	0.740444	1.02778	1.03616	0.948568
2194	0.880092	0.64234	0.81287	0.81412	0.811371	0.924542	0.488256	1.28765	1.45996	0.636496
2195	-0.278627	-0.0219771	-0.266671	-0.00616956	0.0399633	-0.163771	0.450747	1.59937	1.61519	0.897706
2196	-1.23332	-0.67137	-0.396899	-0.532187	-0.871465	-0.407162	-0.509039	-1.55555	-1.22242	-1.10614
2197	2.34889	2.38684	2.51381	2.4538	2.42021	2.34958	2.52896	2.43986	2.46216	2.39198
2199	-0.961283	-1.1608	-1.2271	-1.08103	-0.80884	-0.887386	-0.465999	0.117185	0.0595511	-0.559882
2200	0.261288	-0.0817002	0.641787	0.887363	0.793101	0.304769	0.808857	1.19945	1.31584	-1.18085
2201	-0.487158	-1.22096	-0.236443	-0.66269	-0.169225	-0.855862	-0.396601	-0.550993	-1.31443	-1.36356
2202	-0.607778	2.19901	-0.260035	-0.723685	-1.12301	-0.187608	0.528956	0.726288	0.346902	-0.434222
2203	0.439742	0.219318	0.313779	0.475922	1.2679	0.678994	0.511283	-0.218461	-0.213835	0.197158
2204	-0.498419	-1.22125	-0.51541	-0.756528	-0.50794	-0.415547	-0.75813	-0.64909	-1.02656	-0.834515
2205	-0.10264	-0.159726	-0.160293	-0.885816	0.321252	0.0358849	0.18035	-1.0489	-0.470608	-0.70398
2206	-0.342769	-2.21516	-0.689224	-0.496924	-0.346263	-0.0947077	-1.57628	-2.19204	-0.592192	-1.19012
2207	0.17008	-0.134254	-0.0635573	-0.131962	-0.307352	0.130033	0.49738	-0.856701	-0.484367	-1.37905
2208	-0.847905	-0.605955	-0.709048	-1.08753	-0.579422	-1.03828	-1.30232	-1.56154	-1.00279	-1.60219
2209	-1.19589	-1.66382	-0.860571	-0.836843	-0.517623	-1.69685	-1.61018	-1.65325	-1.81155	-1.40852
2210	0.313684	-1.69071	-0.086425	0.0615809	-1.06716	-0.516219	0.445976	-1.98227	-1.39597	-0.66903
2212	-0.755602	-1.88556	-1.48133	-1.76183	-0.883182	-1.58393	-1.07364	-1.4663	-1.65706	-1.21735
2213	-1.40762	-0.476595	-0.129365	-0.874222	-0.489862	-0.515536	0.0203844	-0.772241	-0.858389	-0.370281
2214	NA	NA	NA	NA	NA	NA	NA	NA	NA	NA
2215	0.253426	0.198049	0.252296	0.46388	0.0808947	-0.0379218	0.66093	-0.367371	-0.0997356	-0.161032
2217	1.28037	0.659296	1.19321	1.15655	1.01434	1.26007	1.26063	1.06799	1.00256	0.698881
2218	0.623618	0.507568	0.643954	0.626391	0.636296	0.495393	0.556109	0.52188	0.378767	0.743012
2219	-0.621703	-0.286935	-0.403115	-0.698898	-0.138003	-0.287574	-0.739574	-0.548306	-0.912292	-0.354234
2220	-0.577642	-0.421651	-1.76835	-0.884914	-0.359395	-0.899027	-0.665276	-0.618425	-0.676247	-0.67904
2222	1.92948	1.79587	1.88931	1.73055	1.81905	1.84459	1.86705	1.80656	2.01653	2.1362
2224	1.11739	1.22963	0.99958	1.1152	1.17964	1.1119	1.20921	1.54938	1.64187	1.10584
2230	0.624725	0.50845	0.656676	0.750128	0.658981	0.846571	0.563654	0.605206	0.716045	0.338567
2232	0.216318	0.292192	0.00815046	0.158459	0.416227	-0.0336281	0.126467	1.03089	0.990246	-0.319773
2235	0.283147	0.517783	0.411061	0.319185	0.309713	0.3528	0.366865	0.517102	0.398273	-0.000231362
2237	0.335355	0.774763	0.291599	0.639714	0.640796	0.146029	0.604281	1.87139	1.79088	0.520286
2239	1.09633	0.215941	0.791258	1.45323	0.823418	0.615564	0.835992	-0.414079	-0.118446	-0.381465
2241	0.276781	0.036459	0.350669	0.403118	0.395468	0.313112	0.0736731	0.389014	0.235743	-1.33056
2242	-1.55869	-0.506576	-0.190087	-1.38088	-0.748171	-1.43717	-0.766996	-0.420219	-1.10423	-1.15456
2243	-1.56805	-1.84359	-1.9305	-1.37384	-1.40754	-2.07586	-2.30745	-2.63695	-2.09088	-2.80548
2244	-0.137986	-0.51038	-0.844164	-0.212112	-0.283572	-0.75072	-0.813006	-0.587219	-0.90146	-0.772224
2245	0.523053	0.638795	0.532439	0.518692	0.771336	0.774207	0.400959	0.966265	0.88709	0.0744863
2246	-1.80445	-1.284	-1.48313	-1.96168	-0.328449	-1.49522	-0.377194	-0.14061	-0.180746	-1.15445
2247	-0.277043	-1.2826	-0.152159	-0.105415	-0.274451	-0.280682	-0.459859	0.579707	0.694369	-1.65088
2248	-1.48262	-1.6149	-1.74503	-1.4085	-1.39733	-1.63473	-0.64768	-1.87495	-1.66433	-1.41471
2249	-0.605412	-1.5514	-1.06421	-1.09821	-1.19076	-1.79178	-1.21942	-1.42597	-1.22861	-1.26683
2250	-0.230587	-0.984887	-0.00638062	-0.923787	-0.387127	-1.45381	-0.112699	0.725089	1.08657	-1.35806
2251	0.0224845	0.0589664	0.138318	0.114899	0.382068	0.11998	0.372188	-0.172846	-0.630375	-0.716021
2252	-2.95059	-2.92625	-1.59552	-3.11406	-2.38542	-2.43704	-2.21321	-2.89318	-2.04191	-2.43487
2253	-1.53531	-1.53736	-1.38782	-1.52798	-1.73881	-1.13523	-0.827112	-1.58958	-1.69517	-1.88288
2254	-0.221928	2.24066	0.142559	0.191293	-0.910024	-0.0797665	-0.160419	-0.555092	-0.976523	-0.753127
2255	-1.23551	-0.473659	-1.14872	-0.203207	-1.03096	-1.38817	-1.01707	-1.5432	-1.51886	-0.730283
2256	-0.776293	-0.36925	0.146661	0.211295	0.423149	0.258423	0.349373	0.358357	0.562707	-0.191991
2257	0.594864	0.395059	0.367163	0.450317	0.693282	0.516939	0.526396	-0.503343	-0.405767	0.436788
2258	1.92634	1.23542	0.896924	-0.00390367	1.04211	2.18997	1.3645	-0.990721	-1.00791	1.60479
2259	0.104418	0.286967	0.319783	0.598469	0.726232	0.446882	0.948745	-1.83704	-1.30779	0.807319
2260	-0.270298	-0.223498	-0.0408941	-0.166506	0.0882874	-0.069292	-0.358627	-0.329837	-0.216367	-0.00168298
2261	-1.12641	-1.38286	-0.898239	-1.27132	-1.69854	-1.02915	-1.44755	0.0959692	-0.0390398	-1.11126
2262	-0.747181	-2.43577	-1.08241	1.25033	0.596722	-0.697595	-0.137892	-2.13367	-0.699303	-2.04327
2263	-0.446037	-0.575022	0.491844	-0.0325751	0.198519	-0.0236772	0.222759	-1.93777	-1.82475	0.525803
2264	-1.15764	-1.21472	-1.15087	-1.52191	-1.05103	-0.910733	-1.06915	-0.649987	-0.951296	-1.4042
2266	-1.59576	-1.25214	-1.00362	-1.04201	-1.69518	-1.31967	-0.65694	-0.996705	-0.866356	-1.54867
2267	0.0872018	-0.346252	-0.636951	-0.514824	-0.179683	-0.82017	-0.289791	-0.38471	0.0571904	-0.309887
2268	-0.996855	-0.876906	-1.59185	-0.759314	-0.516708	-0.41344	-0.174872	-1.3289	-1.5191	-0.805069
2271	0.258292	0.275636	0.262866	0.390773	0.441688	0.201687	0.24371	0.669191	0.538302	0.147641
2272	0.258338	-0.0415833	0.138498	0.339486	0.256249	0.209957	0.275246	-0.61534	-0.464187	0.152357
2273	1.18254	0.88904	0.944276	1.15001	1.11304	1.08995	1.14963	1.0405	1.02994	0.693301
2274	-0.0305364	0.735306	-0.891226	-0.322539	-0.0328792	0.432349	0.252807	1.64585	1.61856	0.328856
2275	-1.09247	-1.53467	-0.700983	-0.95633	-0.742658	-1.15448	-0.797185	0.306813	0.027522	-1.42976
2277	-0.451237	0.258353	-0.216151	-0.388483	-0.0908856	-0.933745	-0.197082	-1.2952	-0.670631	0.123367
2280	1.74866	1.9771	1.66062	1.54791	1.60957	1.68067	1.68984	2.00934	2.23517	1.565
2281	0.502982	0.0758163	0.477784	0.985425	0.821607	0.818346	0.682002	0.876051	0.769617	-0.284667
2286	1.93641	1.52367	1.93742	1.61341	1.61177	1.8697	1.63681	0.99384	1.1838	2.05373
2287	1.65598	1.69138	1.73464	1.56761	1.46265	1.73837	1.5907	1.7336	1.66382	1.74351
2288	-1.32583	-0.591635	-1.29746	-0.511096	-0.953067	-0.907117	-0.710168	-0.853485	-0.336554	-1.1429
2289	0.474064	1.52974	1.07738	0.103784	0.642576	0.766559	0.387942	0.389149	0.358915	0.218041
2290	1.4356	0.529525	1.20629	1.02874	0.860882	0.391569	1.35656	1.31452	1.61776	1.33574
2294	-0.457307	-0.409688	0.00374441	-0.373901	-0.0890597	-0.055682	-0.352962	1.42388	1.46485	-0.140804
2295	-0.172285	0.128582	-0.477901	-0.413842	0.0810091	-0.0812917	0.224528	-0.859653	-0.308706	0.52354
2296	-1.22704	-0.664812	-0.514413	-0.533525	-0.777482	-0.945202	-0.131392	-0.514573	-0.502366	-0.907312
2297	-1.5338	-0.448565	-0.44496	-1.38431	-1.0549	-0.854582	-0.243978	1.65841	1.79657	-0.94991
2298	-0.389213	-0.375257	-0.0192881	-0.22057	-0.0794317	-0.233901	-0.191191	-0.568499	-0.784833	-0.698636
2299	0.00197461	-0.537542	0.176773	-0.284248	-0.109814	-0.334014	0.0198624	-0.895857	-0.29227	-0.767002
2300	-0.608769	-1.97299	-1.11084	-1.86683	-0.730355	-1.47638	-1.25071	-0.913253	-1.0119	-1.79944
2301	-1.39673	-1.24669	-1.24607	-0.4394	-1.14668	-0.632216	-1.18993	-1.41986	-1.07084	-1.41321
2302	0.0427816	-0.129072	-0.12574	-0.471844	-0.334247	-0.221844	-0.440586	-0.4539	-0.536821	-0.681617
2303	-0.625114	-0.392775	-1.10376	-1.24517	-0.577902	-0.646135	-1.29926	-0.550138	-0.509481	-0.408709
2304	-0.775917	-0.975264	-1.76691	-1.11263	-1.6497	-1.59668	-1.36978	0.25783	0.289343	-0.476308
2305	-1.64455	-0.829028	-1.42254	-1.70663	-1.41747	-1.55408	-1.75349	1.69928	1.70003	-1.91789
2306	-0.45167	-0.418578	-0.655354	-0.55517	-0.25228	-0.46881	0.0449581	-0.578844	-0.809239	-0.610109
2307	-0.356927	-0.642254	-0.080891	-1.3211	-0.774353	-0.357625	-0.0766874	-0.681849	-1.00185	-0.694494
2308	-1.31967	0.100371	-1.21805	-1.31476	-0.989898	-1.15309	-1.0246	-1.76466	-1.26331	0.199636
2309	1.09563	1.19627	1.30207	1.17398	1.27609	1.16898	1.04783	1.02004	1.092	0.916571
2310	NA	NA	NA	NA	NA	NA	NA	NA	NA	NA
2312	-0.46152	-0.99923	-0.228532	-0.802412	-0.259682	-0.67797	-1.44706	-0.919267	-1.49686	-1.95633
2313	-0.669621	-0.340081	-0.601655	-0.619862	-1.16884	-1.03959	-0.251557	0.029712	-0.259967	-0.278284
2314	1.01576	1.04693	0.866837	0.989885	0.788023	0.807286	0.962729	1.26894	1.30318	0.816524
2315	-0.679299	-0.699029	-0.515544	-0.637135	-1.88759	-1.41106	-0.567618	-1.32558	-0.862953	-0.76369
2316	1.00449	0.854224	0.855429	0.750273	0.691724	1.07033	0.9173	2.19874	2.28241	0.444469
2317	0.731955	0.144791	0.590453	0.624445	0.885358	0.715053	0.547249	1.46668	1.25031	0.483333
2318	0.0950534	0.209427	0.0790102	0.0610959	0.180588	0.280809	0.05259	1.42786	1.44858	-0.345973
2319	1.2938	0.973198	1.32227	1.43871	1.39809	1.35864	1.2211	1.41489	1.48099	0.642705
2321	0.0948988	-0.299862	-0.049291	-0.225246	-0.0523685	0.193585	-0.253797	-0.643376	-1.09919	-0.117811
2322	-1.20815	-0.698692	-0.212757	-0.285624	-0.268538	-0.187356	-0.669819	-0.805082	-0.33528	-0.743971
2323	-1.37697	-1.74026	-1.04966	-1.3883	-1.2085	-1.51725	-1.326	-0.892533	-1.17095	-1.48508
2324	-0.0500167	-0.233878	0.0530292	-0.0402075	-0.0680365	-0.0136586	0.269845	0.0321064	-0.412319	-0.320849
2326	-0.575927	-0.249114	-0.331021	-0.6774	-0.277952	-0.329018	-0.335943	-1.89429	-0.500348	-1.30854
2327	0.079412	0.645958	0.229109	0.430628	0.221642	0.219908	0.669994	-1.16574	-0.528953	0.305455
2328	-1.80767	-0.292817	-0.441609	-1.72203	-1.84808	-0.814725	-0.430901	-2.17775	-1.1884	-0.831604
2329	0.275306	0.533602	0.432284	0.303235	0.492254	0.106834	0.597175	0.173696	0.371395	0.10682
2330	-0.85068	-0.258266	-0.165179	-0.242438	-0.232463	-0.224481	-0.909177	-1.71508	-0.884312	-0.719967
2331	0.468987	0.583689	0.299377	0.770046	0.121323	0.372775	0.840956	0.0558981	0.204996	0.0786203
2332	1.09791	1.02169	1.00471	1.56154	1.3797	1.18871	1.10643	1.22921	1.09925	0.648345
2334	-0.162221	0.756968	-1.07554	-0.51231	-0.0600622	-0.736617	-0.198033	-0.262556	-0.155989	0.699572
2335	-0.306551	-0.258757	-0.14212	-0.436364	-0.322201	-0.244437	-0.286631	-0.46408	-0.145201	-0.482134
2339	1.66137	2.05446	1.63612	1.67301	1.48016	1.61677	1.59013	1.72272	1.72639	1.75324
2342	-0.518061	-0.223471	-0.454386	-0.393428	-0.261658	-0.358596	-0.609402	-0.468861	-0.218322	0.273938
2346	-2.06061	-0.866616	-1.22282	-1.82521	-1.78042	-1.34771	-1.65877	-1.85108	-2.09492	-1.58791
2348	1.32403	0.386649	1.70869	1.06217	1.51183	1.71494	1.15161	-1.29658	-0.273254	-0.599057
2350	0.374378	0.171043	0.106812	-0.049128	-0.118609	-0.257541	0.619022	-0.704371	-0.952841	-0.0411889
2352	-0.285009	-1.12802	-0.669839	-0.374475	-0.0944948	-0.920122	-0.180846	-0.58424	-0.0834754	-1.581
2353	-0.200681	0.0558728	-0.0215354	0.827674	0.643486	0.345724	0.915605	0.386308	0.440785	-1.59258
2354	-1.01987	-1.19623	-0.870819	-0.253203	1.57333	-1.37994	-0.890249	-1.55444	-0.93143	-1.49023
2355	-0.445727	-0.0306436	-0.610537	-0.0624873	-0.168715	-0.277222	0.398408	0.682541	0.770318	0.0762879
2356	0.706187	0.679566	0.531367	0.828992	0.582026	0.773699	0.696369	0.957182	1.09705	0.643101
2357	-1.4001	-1.15052	-1.53099	-1.46687	-0.311543	-1.45111	-0.579339	-1.34417	-0.821882	-1.50678
2358	-0.766642	-1.12192	-0.434196	-2.42889	-0.460785	-1.00575	-0.677042	-0.825929	-1.15888	-2.07755
2359	-1.12065	-0.886613	-0.357261	-0.460205	-0.85081	-0.716624	-0.204387	-0.855017	-0.941222	-0.496938
2395	0.563785	0.426115	0.500316	0.465162	0.464136	0.554604	0.485065	0.554329	0.54107	0.339059
2444	-1.9883	-0.581381	-1.8795	-0.72506	-1.39728	-0.602803	-0.467867	-0.980865	-1.03163	-1.91283
2475	0.229716	0.491783	0.0640095	0.00576283	0.30972	0.154374	0.157575	0.248724	0.448948	0.357835
2483	0.800695	0.790027	0.927546	0.838135	0.702888	0.946229	0.816184	1.14738	1.13116	0.923586
2487	0.0732194	0.428069	0.183754	0.075318	0.148831	0.0995086	0.510686	0.0196379	-0.149277	-0.153429
2488	1.34842	0.261737	0.0866319	1.84442	1.50485	0.844203	1.1606	-1.24394	-0.649134	-1.36445
2491	-1.3326	-2.69434	-1.14166	-2.53488	-1.58091	-0.908494	-1.06515	-0.847304	-0.877792	-1.05408
2492	-0.554928	-1.44879	-1.00028	-0.566462	-1.09279	-0.887669	-0.743684	-1.29206	-1.44909	-1.57488
2494	-1.15913	-1.9401	-0.498269	-0.946504	-1.79857	-1.82804	-0.864208	-1.57768	-0.600596	-1.53699
2495	2.35104	2.22455	2.4195	2.42301	2.45021	2.52596	2.38596	2.54907	2.58395	2.18504
2498	NA	NA	NA	NA	NA	NA	NA	NA	NA	NA
2509	2.29573	2.2652	2.32019	2.39333	2.30679	2.2775	2.38851	2.36355	2.22612	2.28348
2512	2.5846	2.58353	2.46845	2.54709	2.49462	2.48654	2.63725	2.60268	2.6275	2.64368
2515	-0.617311	-1.15017	-0.962122	-0.842756	-0.59489	-0.663126	-0.586098	-1.36372	-1.28698	-0.779928
2516	0.392472	-0.875632	0.460941	0.234201	0.833286	0.589213	0.661477	-0.642724	-1.11735	-1.12991
2517	1.39094	1.18797	1.35252	1.38099	1.21478	1.23977	1.46287	1.17441	1.24977	2.14858
2519	1.11432	0.820905	0.604617	0.803497	0.664363	1.0157	0.960959	1.57021	1.46553	1.38017
2520	-0.0718818	0.0161271	-0.120213	-0.118505	-0.0155282	-0.255438	0.0360818	-0.670967	-0.130475	-0.330926
2521	-0.7026	-1.79274	-0.292609	-0.847296	-1.21253	-0.473317	-1.65482	-0.210343	-0.454282	-0.637537
2523	0.862251	0.0442927	0.844941	0.831033	0.54128	0.401048	0.825628	-0.0973092	-0.368001	0.368679
2524	0.0325671	-0.15474	0.284975	-0.110363	-0.794557	0.366868	-0.596978	-0.809605	-0.0490641	-0.569361
2525	-0.877324	-1.16421	-1.04239	-0.103922	-0.185023	-0.418873	-0.634402	-1.26749	-0.39613	-1.32834
2526	-0.00628391	-0.115171	-0.0756221	0.1635	0.10538	0.135401	-0.555123	-0.16897	0.0510731	-0.18071
2527	0.0636693	-0.0508022	0.189978	-0.0438656	0.15922	0.166026	0.156668	-0.313032	0.194475	-0.441911
2528	-1.10336	-1.39835	-1.20528	-1.02213	-1.0196	-1.11136	-1.06591	-1.52299	-0.929207	-1.70863
2529	-1.52414	-1.8357	-1.3904	-1.84934	-0.903638	-0.956154	-1.53688	-1.17058	-1.74029	-2.27342
2530	0.509674	0.516762	0.328576	0.466144	0.392318	0.409559	0.605294	1.04409	1.10412	0.219762
2531	-0.111096	-0.0649964	-0.0101131	0.170474	-0.2018	-0.149391	-0.398577	0.0814499	-0.0137033	-0.29349
2532	-0.0661136	0.489459	0.406319	-0.18799	0.679083	0.680051	0.560254	-1.36115	-1.36778	0.322583
2533	-0.044127	-1.32124	-0.14697	-0.527069	-0.636987	-0.736374	-0.162523	-1.7283	-0.667275	-1.13892
2534	-0.056596	-0.478271	-0.154164	-1.17236	-0.329772	-0.270478	-0.137925	-0.454713	-1.58782	-0.55132
2535	-1.57751	-2.16329	-1.85853	-1.67193	-1.66503	-1.82174	-1.77949	1.67447	1.68999	-2.3256
2537	0.859045	0.824796	1.14784	1.15828	0.816951	0.971011	1.18711	0.66979	0.710195	1.20052
2538	-0.15012	-0.343251	-0.460912	-0.611497	-0.0702998	0.0455999	-0.0157206	-0.489083	-0.11491	-1.56229
2539	1.32413	1.92631	1.08909	1.13904	0.954988	1.2111	1.13324	1.04454	1.06101	0.498479
2542	0.652085	-0.29838	0.558663	0.713924	0.659147	0.644859	0.658712	0.690092	0.717937	0.0468542
2543	-0.685643	-1.3981	-1.49533	-1.98486	-1.34852	-1.81871	-0.967215	-2.0095	-1.50208	-1.58186
2547	2.19619	2.13642	2.09441	2.16424	2.08094	2.15293	2.13729	2.23555	2.20659	2.04941
2548	1.29905	1.25552	1.19915	1.02089	1.17482	1.14841	1.11744	0.736295	0.758455	1.55665
2549	-1.11571	-2.06952	-0.618014	-2.25301	-1.46284	-1.09629	-1.43871	-1.6284	-1.60012	-0.991223
2550	0.82903	0.829411	0.727885	1.45957	1.17709	0.80455	0.956464	0.402282	0.489081	0.917486
2551	-0.123635	0.0198508	-0.252467	-0.230806	0.165367	-0.153363	-0.31139	0.311784	0.367258	-0.674623
2553	0.684568	0.654357	1.01916	0.767521	0.812678	0.90792	0.822687	1.23286	1.24539	0.617593
2554	-1.14312	-1.61218	-0.789569	-1.14498	-0.437124	-1.33015	-0.667596	-1.03503	-1.79821	-0.405189
2555	-0.254903	-0.778109	-1.35822	-1.00494	-1.6651	-1.4145	-0.539887	-0.743847	-1.12011	-1.24338
2556	-1.46694	-1.38678	-1.58447	-1.38746	-1.53534	-1.34272	-1.63425	-1.74261	-1.77498	-1.42488
2557	0.00706885	-0.312166	0.103645	-0.144041	-0.0687658	-0.13029	-0.000195706	-0.515842	-0.369598	0.895995
2558	-0.73301	-0.52579	-0.441406	-0.386899	-1.0193	-0.716393	-0.995349	-1.1696	-1.18157	0.441847
2559	-1.60326	-1.69478	-0.753165	-1.37466	-0.388169	-1.88242	-0.43223	-1.80385	-0.943908	-1.6634
2560	-0.100658	1.53637	0.570756	-0.299085	-0.442118	-0.209052	0.0664904	-0.910427	-0.565404	1.76743
2561	-0.301719	-0.158086	-0.328849	-0.412452	-0.306362	-0.114923	-0.496377	-0.867371	-0.278816	0.881153
2562	1.42008	1.21916	1.40822	1.36229	1.48404	1.54662	1.46364	-0.966894	-1.37539	1.29011
2563	-0.500616	-1.19245	-0.803518	-0.145549	-0.0900938	-0.804109	-0.572356	-1.2855	-1.26187	-1.43536
2564	-1.57944	-0.654526	-1.14513	-0.819632	-1.47325	-1.14213	-0.512103	-0.691028	-0.208461	-1.78204
2565	-0.900618	-0.917301	-0.334988	-0.107191	0.0930477	0.0091021	-0.717466	-0.875935	-0.947767	-1.10395
2566	1.34878	-0.0408716	1.66262	1.43222	1.38493	1.52873	1.43082	-1.99208	-0.688496	1.7258
2567	-1.77761	-2.25082	-0.402897	-1.53989	-1.6746	-1.24984	-2.1129	-0.747126	-1.79765	-0.552337
2568	-0.273016	-0.497336	-0.182055	0.127269	-0.220495	-1.06724	0.419753	-1.49358	-0.373435	-1.3353
2569	-0.0209641	-0.418927	-0.223563	-0.20122	-0.122153	-0.380347	-0.192918	-0.793759	-0.521887	-0.565864
2570	0.12967	-0.137557	0.128336	-0.389446	-0.188479	-0.28395	-0.0237578	-0.31571	-0.12258	-0.562683
2571	1.4679	-0.335979	1.82137	1.5016	1.45264	0.516086	1.52631	-2.07029	-1.71769	0.0882478
2572	-1.39122	-0.987111	-0.593692	-0.79599	-0.736927	-1.44474	-1.17232	-0.725528	-0.28484	-0.384495
2575	-1.37043	-0.415787	-0.172322	-0.856208	-0.737006	-0.764312	-0.931843	-1.33705	-1.27548	-0.778543
2579	NA	NA	NA	NA	NA	NA	NA	NA	NA	NA
2580	1.06572	0.909153	0.809294	0.905264	0.748024	0.94181	0.812499	0.990541	1.07966	1.13774
2581	1.37885	1.41983	1.47493	1.57524	1.50426	1.47075	1.25737	0.73489	0.78514	1.60894
2582	-0.189034	0.00777528	-0.00204766	-0.152687	0.230341	0.073298	-0.100619	0.203576	0.0391972	-0.609724
2583	0.290901	0.127342	0.611314	0.577283	0.797857	0.803087	0.552275	-0.297126	-0.189204	-0.0252589
2584	-1.82971	-1.61491	-1.51599	-0.968935	-0.690218	-1.40925	-0.979934	-0.0719547	0.108736	-1.70172
2585	0.259612	0.614018	0.370158	0.499137	0.392207	0.634217	0.396941	0.415589	0.518474	0.447282
2587	-1.0872	-1.39427	-0.616499	-0.569929	-1.54003	-1.08846	-0.340994	-0.78753	-1.7476	-0.939333
2588	0.64308	0.61644	0.639468	1.15665	0.911048	0.639085	0.769476	0.917093	0.875831	0.523236
2589	0.999755	1.56988	0.701072	0.894199	0.591947	0.727385	0.800446	1.2068	1.2391	1.72746
2590	0.360333	0.0570184	0.170906	0.263888	0.501549	0.477653	0.249038	0.982315	1.05415	-0.0824574
2591	0.388411	0.771857	0.537251	0.637731	0.693892	0.419815	0.641161	0.456693	0.510681	0.473421
2592	1.06245	0.945204	0.969146	1.04303	1.06633	1.05124	1.05444	0.665514	0.642112	0.822339
2593	0.305561	0.113913	0.1185	0.272621	-0.107443	-0.387024	-0.595247	0.0531989	0.28735	-0.37371
2595	-0.461004	-0.664521	-0.288745	-0.374607	-0.187451	0.0288383	-0.351348	-0.0145661	-0.0360173	-0.201
2596	-0.36855	1.05358	-0.3072	0.0447208	0.390725	0.280771	0.400742	-1.18172	-0.153656	-0.149352
2597	2.72597	2.67521	2.69788	2.66507	2.69796	2.65597	2.71288	2.61494	2.79687	2.69922
2615	-1.4821	-0.803787	-1.17353	-1.04289	-1.05442	-0.809185	0.275602	-1.63952	-1.52133	-1.16599
2617	1.80697	1.84562	1.78081	1.77087	1.7054	1.81551	1.73114	1.784	1.74144	1.81036
2618	-0.0379339	-0.219405	0.0378185	0.0409391	-0.18248	0.199077	-0.0391116	0.185746	-0.0820686	-0.131907
2619	-2.00246	-2.11871	-1.52967	-1.05714	-1.60143	-1.58909	-1.79774	-1.17099	-0.90495	-1.45733
2620	0.527704	-0.746341	-0.847556	0.106227	-0.167492	-0.296796	-0.103258	-1.16878	-1.98669	-0.00853879
2621	1.45003	1.15673	1.3891	1.23868	1.18043	1.36036	1.4505	2.14205	2.30553	1.89804
2622	0.705445	0.624016	0.688055	0.76527	0.638054	0.624131	0.70155	0.298889	0.127542	0.497651
2623	-1.17367	-1.15935	-0.772958	-0.978211	-0.609684	-0.73966	-0.888157	-1.17091	-0.759546	-0.949742
2624	0.153646	0.0126823	0.176489	0.418467	0.628235	0.0732193	0.383319	-0.105704	-0.176635	-0.176059
2625	0.844161	0.71575	0.689799	0.824728	0.883399	0.968619	0.876168	-0.820885	-0.676222	0.157626
2626	-1.50446	-0.578562	-0.880806	-1.46775	-1.41167	-1.1471	-0.977881	-1.01521	-0.892528	-1.06861
2627	-0.50431	-0.651982	-0.830021	-1.42522	-0.457199	-0.600633	-0.211925	-1.32821	-1.09184	-1.29966
2628	-1.99692	-2.24281	-1.96013	-2.03184	-1.93865	-1.5562	-1.72098	-2.30837	-1.29379	-2.09376
2629	NA	NA	NA	NA	NA	NA	NA	NA	NA	NA
2630	1.04177	1.18092	0.964193	0.943505	0.764233	1.00975	1.03806	1.00766	1.10953	1.48226
2631	1.40134	1.45509	1.4183	1.56347	1.32095	1.37254	1.49784	1.272	1.16354	1.56862
2632	1.55929	1.02667	1.46069	1.30925	1.26198	1.47989	1.45206	1.77986	1.81262	1.56137
2633	0.232047	0.296053	-0.166461	-0.0297554	-0.253508	-0.332319	0.373665	1.3855	1.28184	-0.210393
2634	0.207735	0.273621	-0.0165824	-0.594776	-1.07432	0.0118	0.259255	0.672046	0.644517	-0.0921004
2635	-0.973846	-0.895701	-0.269217	-0.286397	-0.335593	-0.338291	0.138688	1.34513	1.25393	-0.524118
2636	-1.30981	-1.16813	-1.21681	-1.27333	-1.06687	-1.25448	-1.21097	-1.48913	-0.650714	-1.37289
2637	-1.07466	-1.11896	-0.883903	-1.6386	-1.09575	-0.956773	-1.05327	-1.47696	-1.74121	-1.44601
2638	-0.791116	-2.18276	-1.47953	-1.1963	-0.31975	-0.151212	-1.449	-0.824575	-1.486	-0.864693
2639	0.770161	0.647326	0.693372	0.640045	0.471604	0.855158	0.697462	0.630154	0.620961	0.697728
2641	-0.685936	-0.596628	-1.37394	-1.68555	-1.61325	-1.35143	-1.2218	-0.657613	-1.44501	-1.079
2642	-0.104691	-0.276033	-0.277243	-0.537756	-0.435558	-0.395273	-0.0541976	-0.112576	-0.505757	-0.590582
2643	0.979191	0.666403	0.75951	1.31449	0.866801	0.853865	0.707637	0.506493	0.322731	1.05075
2644	0.60834	0.055992	0.488979	0.883897	0.667834	0.47203	0.636255	0.499587	0.650858	-0.398262
2645	1.12498	1.34141	1.07692	1.19028	1.34472	0.991682	1.23182	-0.642853	-1.21508	0.536139
2646	-1.20365	-1.51174	-1.18682	-1.41349	-1.18778	-1.19017	-1.08357	-1.56247	-1.02101	-1.16437
2647	1.36393	1.45506	1.49043	1.45034	1.43302	1.48943	1.46138	1.36156	1.31872	1.35393
2648	0.618294	0.778177	0.802706	0.699192	0.647281	0.859436	0.638697	0.654769	0.655403	0.497596
2649	-0.260214	-0.337119	-0.43162	-0.627985	-0.195838	-0.683502	-0.404403	-0.56768	-1.09598	-0.47007
2650	-0.159529	-0.352004	-0.972591	-0.143439	0.277239	0.153164	0.113938	0.205136	0.0502778	-0.637815
2651	-0.113925	-0.698031	-0.0758218	-0.468615	-1.44703	-0.323184	0.157021	-0.73297	-0.255735	-0.672326
2652	NA	NA	NA	NA	NA	NA	NA	NA	NA	NA
2653	NA	NA	NA	NA	NA	NA	NA	NA	NA	NA
2657	NA	NA	NA	NA	NA	NA	NA	NA	NA	NA
2658	-0.10934	-0.630115	0.0921197	-0.00523704	0.158478	0.320861	-0.309319	-0.126559	-0.770412	-0.486629
2660	-0.887835	-0.748938	-1.05445	-0.544341	-0.876453	-1.27912	0.299898	-0.768273	-0.857289	0.857335
2661	-0.149128	0.322413	-0.312349	-0.451533	-0.622858	-0.553802	0.0367407	-1.03582	-0.125283	-0.357772
2662	0.37177	-1.3231	-1.55973	-0.538572	0.738694	-0.315937	0.655998	-1.62041	-0.222525	-0.469512
2664	2.23719	2.17336	2.28582	2.29805	2.26218	2.28508	2.18531	1.6602	1.81355	2.13252
2665	1.61768	1.96401	1.58696	1.66637	1.70243	1.675	1.71859	1.93319	1.96832	1.35488
2668	-1.45739	-1.07019	-0.381239	-0.742378	-0.833379	-0.306698	-0.264092	-1.54058	-0.402803	-1.58992
2669	-0.0941738	0.36347	-0.143772	-0.0548233	-0.191691	0.161706	0.503602	0.839019	0.883151	0.372657
2670	-1.09117	-1.59702	-1.40974	-0.62904	-1.05917	-1.16182	-0.0645159	-1.81988	-1.57416	-1.68378
2671	0.374154	0.241735	0.254704	0.102186	0.153483	0.261715	0.522484	0.33977	0.556343	-0.0276414
2672	-1.4525	-1.65231	-1.19429	-1.35897	-1.23012	-1.65248	-1.30535	-1.82671	-1.49497	-1.5545
2673	1.42103	1.58285	0.925482	1.3761	1.48826	1.55066	1.26	1.20168	1.38592	1.1644
2674	-0.487	-0.762374	-0.238096	-1.90514	-0.120235	-0.664961	-0.300658	0.156038	-0.0683389	-1.08725
2675	-0.498533	-0.923983	-0.499761	-0.692829	0.795296	0.230613	-0.512782	-0.743984	-1.62061	-1.13753
2676	-1.13601	-1.5084	-1.07529	-1.30935	-0.997563	-1.12112	-1.15983	-1.10877	-0.913147	0.220714
2677	0.358823	0.642339	0.486738	0.402824	0.312898	0.338712	0.449279	0.960885	0.878298	0.675044
2678	0.162515	-0.257106	0.261258	0.207152	-0.0128208	0.0898506	0.287793	-0.118709	-0.0360166	-0.202018
2679	NA	NA	NA	NA	NA	NA	NA	NA	NA	NA
2681	0.89904	0.394807	0.612382	0.65339	0.790021	0.511386	0.937755	-0.531815	-0.364888	0.358823
2683	-1.17856	-0.749309	-1.40993	-0.904058	-1.00115	-0.917298	-0.659456	-0.629078	-0.509117	-1.34768
2686	0.139147	-0.109145	0.127	0.229707	0.539922	-0.164884	0.284695	-0.260657	-0.318499	-0.177243
2687	-1.56699	-0.447945	-1.28335	-1.64884	-1.35787	-1.25266	0.10135	-1.60338	0.0765345	-1.73253
2688	0.412932	2.76827	0.647536	0.109747	0.230272	1.52736	-0.189396	-1.78125	-0.716547	0.0404871
2689	-0.0643538	0.16643	0.190579	-0.455112	0.0315363	-0.494075	-0.793211	-1.81245	-1.28922	-0.258832
2690	0.361237	0.427229	0.391164	-0.771694	-0.630474	0.0493938	0.646058	-0.851502	-1.0544	-0.753673
2691	-0.282086	-0.331332	0.0513776	-0.199342	-0.179454	-0.109869	-0.0655615	-0.503416	-0.1661	-0.908972
2692	-0.253771	2.16235	-0.0198045	-1.02147	-1.04213	-0.630825	-0.822653	-0.771717	-1.13319	2.48163
2693	-0.494679	-1.40715	-1.20205	-1.5858	-1.18365	-1.28022	-0.871619	-1.63721	-1.42935	0.342148
2694	-0.914091	-0.778459	-0.362995	-1.40741	-0.269759	-1.95801	-0.953521	-1.46165	-1.28035	-0.586931
2695	-0.365878	-1.16274	-0.897278	-0.259114	-0.406822	-1.12034	-0.991884	-1.42848	-1.21264	-1.52113
2696	-0.963699	-1.01255	-0.596417	-1.48778	-1.02424	-0.773017	-0.712456	-1.49558	-0.553083	-1.84009
2697	0.119738	0.509021	-0.121105	0.491996	0.196821	0.149585	0.462966	1.66989	1.61079	0.343475
2700	-1.58176	-1.55054	-1.52158	-1.44833	-1.17595	-1.62049	-1.12789	-1.27823	-1.46143	-1.61106
2701	-0.263601	0.671742	-0.144817	0.0853003	-0.288219	-0.0412617	0.451093	-0.52469	-1.08977	0.136796
2702	-1.37424	-2.17186	-0.815815	-1.28487	-1.1737	-0.07468	-0.755299	-1.33136	-1.03794	-1.31869
2703	-0.800521	-0.646321	-0.639564	-0.665757	-0.0852741	-1.19538	-1.00565	-1.43918	-1.13531	-0.679023
2705	0.0670697	-0.423438	0.143683	-0.383433	0.238618	-0.263375	0.229592	-1.06331	-0.367157	-0.474849
2706	-0.685383	-1.09735	-1.24312	-0.247699	-0.760823	-0.885457	-0.315741	-1.01892	-0.400649	-1.15504
2707	-0.733528	-0.822144	-1.24313	-1.43414	-0.683342	-0.790621	-1.06552	-0.123101	-1.31406	-1.22717
2709	-1.41282	-1.6153	-1.26806	-1.56391	-1.11543	-1.37378	-1.38881	-1.95858	-1.88246	-1.33393
2710	-0.125999	0.303211	-0.0409005	0.0931056	0.168681	0.219692	-0.183227	-0.0786076	0.0859293	0.22019
2712	-0.321954	-1.20817	-0.415924	-0.434779	-0.176544	-0.721082	-0.114941	-0.89639	-0.324183	-0.479886
2713	-0.397512	0.162312	-0.140413	0.100643	0.255538	0.232294	-0.22712	0.137365	0.185762	0.220975
2717	0.796454	1.04738	0.771674	0.782611	0.701814	0.826796	0.75071	1.10033	1.19455	1.77308
2719	0.119272	0.525094	0.017718	1.63668	-0.270419	0.167317	0.227828	-0.804392	-1.19156	-0.069608
2720	1.47231	1.17779	1.39299	1.21311	1.13668	1.34064	1.3669	1.66462	1.64479	1.8657
2729	-1.13615	-0.955011	-0.905292	-1.19128	-0.0707714	-0.216105	-1.56423	-0.958937	-0.649301	-0.811987
2730	1.14352	0.477024	0.792613	1.27547	1.06007	1.09867	0.940356	1.29605	1.38007	0.464942
2731	0.202562	0.356778	-0.36383	-0.720994	-0.68981	0.435734	-0.77369	-0.324355	-0.128737	-0.379882
2733	0.670022	0.498791	0.518122	0.374597	0.495185	0.515366	0.608433	0.929158	1.04693	0.370125
2734	2.0975	1.78956	1.83968	1.74979	1.68765	1.97908	1.71723	1.51518	1.55968	1.73019
2735	0.159167	-0.211773	-0.2027	-0.958013	-0.770964	-0.839254	-0.236702	-0.131938	-0.983372	-1.02467
2736	-1.48009	-0.507739	-0.320666	-1.90123	-1.94198	-0.0118755	-0.242105	0.590534	0.447979	-0.54057
2737	-1.88708	-2.14641	-1.4587	-1.95206	-1.56233	-1.66523	-1.80841	-0.0256491	-0.426904	-1.84815
2738	-2.05501	-1.9586	-1.94523	-1.25302	-1.07303	-1.5177	-1.76113	-1.70355	-1.72898	-2.4607
2739	1.68368	1.53092	1.63855	1.74791	1.66771	1.71593	1.76458	2.21303	2.19075	1.53597
2740	0.217885	0.244864	0.556779	0.305455	0.760654	0.0518123	0.835456	-0.144345	0.0322097	-0.0116866
2741	-1.09542	-0.919597	-0.557774	-0.952767	-1.27387	-0.279453	-0.265592	-0.899895	-0.282997	-1.50315
2742	-0.314052	-0.653618	0.148536	-0.384945	0.0654324	0.400377	-0.526183	-0.910807	-0.275923	-1.14996
2743	1.12022	0.306451	1.44765	0.98216	1.08818	1.18239	1.15237	0.647318	0.642489	1.07182
2744	1.09816	0.612453	0.519024	0.588921	0.420972	0.853728	0.781291	0.45331	0.385202	0.730625
2745	1.12981	2.04488	1.0273	1.42332	0.801539	0.978041	1.1898	1.72161	1.75517	1.1934
2746	0.996133	0.991244	1.21298	1.15572	1.17981	1.17066	1.21636	1.36335	1.5005	0.851014
2747	-0.52571	-0.83963	-0.32876	-0.203487	-0.164172	-0.526415	-0.316647	-0.762028	-0.430083	-1.09754
2749	NA	NA	NA	NA	NA	NA	NA	NA	NA	NA
2752	1.70986	1.41522	1.20137	0.936079	1.16902	1.16488	1.27949	0.835773	0.993504	0.178815
2760	0.536864	0.41056	0.595786	0.701352	0.717377	0.691569	0.841413	0.192834	0.47199	-0.0145008
2762	0.923876	0.650081	0.610774	0.396689	0.862058	0.867793	1.03094	0.611331	0.531319	0.449453
2764	0.407875	0.565964	0.317549	0.419049	0.532664	0.398092	0.738171	1.11124	1.03818	0.419012
2765	-0.303867	-0.498568	-0.243478	-0.535868	0.132431	-0.186214	-0.199754	-1.72635	-0.41797	-0.269126
2766	0.802274	1.00875	0.763998	0.567817	0.728477	0.680389	0.742035	0.293975	0.338498	0.455217
2767	0.653271	0.489747	0.916188	0.631623	0.84683	0.853373	0.985827	0.980188	1.01952	0.482712
2768	0.594543	0.92406	0.66104	0.775399	0.727556	0.706451	0.532134	0.945127	0.985506	0.656009
2769	-0.205983	-0.449436	-0.408312	-0.193338	-0.231842	-0.131947	-0.125845	-0.944635	-1.19219	-0.358994
2770	1.22004	1.31793	0.818233	-0.259722	0.714444	1.3442	1.12654	1.00378	0.849731	1.1143
2771	1.17151	1.06818	0.983115	1.31706	1.21807	1.13896	1.13449	1.35714	1.49931	0.527793
2773	1.02891	0.754902	1.02066	0.999305	1.06783	1.08273	1.02055	1.41396	1.33643	0.593364
2774	0.539296	0.330845	-0.126828	-0.0434143	0.213143	0.334151	0.227701	-1.48087	-1.51996	0.690694
2775	1.08683	1.50076	0.963542	1.39162	1.17015	0.885036	0.982378	-0.416511	-0.337477	1.25323
2776	1.63186	1.73592	1.45099	1.74376	1.77056	1.65334	1.50168	1.38847	1.36805	1.56564
2778	2.88861	2.77755	2.86288	2.80102	2.87819	2.80536	2.92944	2.57689	2.77651	2.84189
2779	-1.59364	-1.78404	-0.9668	-1.40353	-1.09325	-1.47756	-1.21877	-1.55878	-1.30651	-1.64893
2780	-1.32493	-1.50557	-1.73342	-1.41454	-1.06754	-1.0609	-1.83165	-0.958004	-1.25593	-0.933148
2781	1.38669	1.02783	1.19354	1.50309	1.49541	1.47247	1.44544	-0.368738	0.0389167	0.778008
2782	1.64883	1.38746	1.53494	1.48794	1.79045	1.70569	1.63137	1.99192	2.02693	1.28506
2783	1.63822	1.61979	1.68627	1.79835	1.74932	1.78304	1.69637	1.77303	1.80353	1.48639
2784	1.85928	1.1169	1.98691	1.53952	2.02394	1.83072	2.0288	-0.209525	-0.485902	0.695473
2785	1.30761	0.861387	1.10608	1.93845	1.17017	1.71889	1.41851	-0.0677754	-0.126078	1.55073
2786	-1.03309	0.0572067	0.245251	0.435694	0.52201	0.505926	0.496654	-0.800416	-1.14351	0.627128
2787	1.20519	1.45607	1.15235	1.23664	0.949058	1.23438	1.22717	2.0597	2.11875	0.868471
2788	1.15853	0.279383	1.14695	0.666074	0.757216	1.16574	1.01273	-0.0340974	-0.282572	0.740879
2790	1.8191	1.79817	1.84789	1.90877	1.74901	1.7668	1.91129	1.64949	1.49939	1.99967
2791	-0.0273045	0.767109	0.00935043	0.233286	0.162695	0.025636	0.961654	1.05997	1.34213	0.307919
2792	-2.18379	-1.92466	-0.740809	-0.856398	-0.558095	-2.08053	-1.72669	-1.84671	-1.69201	-0.925745
2793	-0.117603	-0.362359	0.201997	-0.665845	-0.584879	-0.0914734	0.268282	-0.499792	-0.17821	-0.98059
2794	0.793905	0.745313	0.800121	0.670835	0.738526	0.94429	0.842553	0.911532	1.00997	0.408347
2796	-0.790218	-1.74856	-1.59719	-0.304969	-0.651957	-0.771539	-1.04974	-0.848975	-0.420738	-0.395904
2797	-1.50216	-0.980958	-1.067	-0.784541	-1.17111	-1.07945	-0.846571	-1.03378	-1.46197	-1.25761
2798	0.0907126	-1.11437	-0.676191	-1.31637	-0.72714	-0.199741	-1.68026	-1.44789	-0.551127	-1.69611
2799	0.615609	0.621272	0.626956	0.728371	0.979949	1.03679	0.940264	1.26909	1.37346	0.735307
2800	0.828502	0.996141	0.710325	0.606892	0.788427	0.560826	0.709117	0.839809	0.861854	0.944419
2801	1.16119	2.03965	0.766856	0.87876	0.853797	0.746897	0.4038	0.704641	0.831946	1.77298
2802	-0.255955	-0.368182	0.0973706	-0.213965	-1.45254	-0.204259	0.0170837	-0.338314	-0.25762	-0.29162
2803	1.14318	1.31298	1.09332	1.26674	0.950678	1.21615	1.0901	1.36322	1.15786	1.61267
2804	1.22873	1.26466	1.07697	1.23476	1.08788	1.18964	1.16805	0.774461	0.811037	1.06709
2805	1.24764	0.964627	1.28224	1.21773	1.33808	1.29879	1.38746	1.2338	1.27506	1.22296
2806	1.58736	1.66547	1.54647	1.6238	1.47371	1.72852	1.4854	1.70819	1.74771	1.38423
2810	-1.1519	-0.460828	-1.08283	-1.39696	-1.23789	-1.02943	-1.01242	-0.341346	-0.807042	-0.421403
2811	0.171015	-0.242107	0.239349	-0.021255	0.280492	-0.124538	0.00902578	-0.395119	-0.14925	-0.0602088
2812	-0.937278	-1.11274	-0.716916	-0.995399	-0.710544	-0.871215	-0.634339	-1.10761	-1.03919	-1.35208
2813	-0.944853	-1.36765	-0.453058	-0.661071	-0.491489	-0.757468	-0.74546	-0.993571	-0.488549	-0.761968
2814	-1.34691	-1.13002	-0.149605	-0.511976	-0.297791	-1.2713	-0.268099	-1.11783	-0.988345	-0.395694
2815	-1.14115	-1.33422	-0.825946	-1.14186	-1.05725	-1.10855	-0.96894	-1.73544	-1.71378	-1.73268
2817	0.239809	-0.272662	-0.0999416	0.322495	0.441764	0.27603	0.276618	0.34733	0.509629	-0.262031
2819	-1.69212	-1.25584	-1.30857	-1.4798	-0.979838	-1.41354	-1.53777	-1.58431	-1.31914	-1.36351
2820	0.123927	-0.190607	0.136859	0.258589	-0.0571486	0.213046	0.0927298	0.19461	0.115746	-0.400347
2821	1.82498	2.11061	1.95242	1.78575	1.94008	1.99473	1.91613	1.8117	1.97979	2.23579
2822	0.0219176	-0.205846	0.051531	-0.0415649	-0.0401196	0.125056	-0.206098	-0.521263	-0.541494	0.230955
2823	1.17045	-0.123651	0.445111	1.70213	1.66437	0.706649	0.591304	-0.980543	-0.887967	-1.7331
2824	-0.0652476	0.16188	-0.0431884	0.534481	-1.12397	0.184345	0.303541	-0.90811	-1.33848	0.241544
2825	-0.735884	-0.557758	-0.518358	-0.717503	-0.30967	-0.0415646	-1.17779	-0.529916	-0.252597	-0.702484
2826	0.495949	0.989758	1.02861	1.30353	1.16335	0.974083	0.769246	-0.468093	-1.11725	-1.06307
2827	-0.300107	-1.41686	-0.855744	-1.29575	-0.605367	-1.11389	-0.585701	-0.33799	-0.0185187	-0.203117
2828	-0.157929	-0.0128122	0.0482589	-0.109496	0.160304	-0.162039	0.0595749	-0.21858	-0.332187	-0.0648736
2829	-0.733568	-1.28586	-0.427567	-1.0831	-0.0884082	-0.796279	-0.519797	-0.523448	-0.527116	-0.787119
2830	0.287959	0.236214	0.679736	-0.0678139	0.556432	0.511964	0.325305	-0.330274	-0.114997	-0.0534446
2831	-1.16003	-1.41254	-0.504287	-1.03774	-0.502512	-1.27248	-0.824049	-1.53398	-1.38123	-1.39356
2832	-1.26094	-1.58274	-1.55502	-0.679469	-0.582303	-1.62682	-0.685998	-0.839844	-0.783732	-1.75591
2833	-0.937292	-0.819426	-0.819238	-0.744888	-0.877018	-0.898765	-0.901045	-1.38545	-0.755068	-0.189233
2834	0.650095	-0.144865	0.618586	1.30478	1.34784	1.01887	1.18421	-0.973516	-1.46908	-0.825902
2835	-2.0595	-2.20683	-1.82547	-0.521301	-0.894633	-1.46967	-1.42589	-0.796409	-1.87688	0.716347
2837	-0.507921	-0.538908	0.31996	0.26582	0.119527	0.373327	0.393255	0.144855	0.257368	0.341442
2838	-0.294405	-1.05119	0.092718	-0.232428	-0.238516	-0.191377	-0.0137673	-0.263378	-0.222898	-0.326818
2840	-1.90678	-1.86154	-1.71435	-2.05962	-1.26735	-1.57231	-1.67328	-1.85403	-1.27142	-1.97838
2841	-1.65926	-1.11126	-0.507575	-0.773595	-0.588643	-0.630202	-1.48679	-1.01327	-0.59735	-0.899195
2842	1.23982	1.40743	1.13792	1.196	1.10267	1.20919	1.20145	-0.167211	-0.0693996	1.19883
2843	-1.14666	-1.17014	-0.480879	-1.81142	-1.33646	-0.474908	-1.01262	-1.92014	-0.666204	-1.50274
2844	-0.133637	-0.537135	-0.0339405	-0.111088	-0.406559	-0.115688	0.0594603	-0.341293	0.0151071	-0.671124
2845	-0.237698	-0.40497	-0.0725979	0.107763	0.287961	-0.106752	-0.740544	-1.45179	-0.936415	-0.515633
2846	-0.592105	-0.864769	-0.603629	-0.743143	-0.378982	-0.531682	-0.483409	-0.539476	-0.0387013	-0.830327
2847	-0.577595	-1.70516	-1.04972	-1.4839	-0.727676	-0.61655	0.0899759	-1.76694	-1.31031	-1.56736
2848	-1.13368	-0.849362	-1.37064	-1.34383	-1.25835	-0.580149	-1.06889	-1.33945	-1.43465	-1.32534
2849	-1.6997	-1.7111	-1.75363	-1.60234	-1.0787	-1.52224	-0.542407	-0.871023	-0.450088	-1.37188
2850	0.553808	0.0690401	0.381581	0.491956	0.477576	0.52343	0.674931	-0.124486	-0.101407	0.149733
2852	-0.0138538	-0.588563	0.0102437	-1.3607	-0.945254	-1.1696	-1.10512	0.0178351	-0.509545	-1.46208
2853	-1.54735	-1.11162	-1.67452	-1.29532	-0.908125	-1.50908	-1.58433	-1.80686	-1.56454	-1.39275
2854	-0.457655	-0.989938	-1.07373	-0.349722	-0.789822	-0.78121	-0.176204	-0.533729	-0.239377	-1.48761
2857	0.696325	0.202842	0.665161	0.504227	0.0215267	0.586157	0.749812	-0.842259	-0.674719	0.0257093
2859	-0.450711	-0.252331	-0.279527	-0.0846731	-0.0915752	-0.243696	-0.607651	-1.13969	-0.381079	-0.027568
2861	-0.655523	-0.256566	-1.57005	-0.644047	-0.280448	-0.538959	-1.50195	-0.69102	-0.570848	-0.615781
2862	-1.17436	-1.1491	-0.631809	-1.03348	-0.84328	-0.504681	-0.572717	-1.93996	-0.507269	-1.86349
2863	-1.3568	-1.82444	-1.21774	-0.583989	-1.07335	-1.35845	-1.42391	0.381845	0.334864	-2.04855
2864	-2.00954	-2.18436	-1.78473	-2.0776	-1.6521	-1.72738	-1.57867	-1.92309	-2.06928	-1.8008
2865	-1.22936	-1.1811	-1.27504	-1.40132	-0.914065	-1.19224	-1.4351	-1.37955	-0.60306	-1.23911
2867	-1.48163	-1.93373	-1.28136	-1.03172	-1.42566	-1.72339	-1.18787	-1.83509	-1.90547	-1.63771
2868	-0.154934	-0.161069	0.195485	-0.0777396	-0.313819	0.0985052	-0.0210737	-0.223968	-0.312154	0.259947
2869	0.064292	-0.203037	0.421113	0.231148	0.403025	0.333039	0.218253	-0.0962894	0.0480136	-0.0295329
2870	0.0775035	-0.00918847	0.041146	0.115314	0.192478	0.00169066	0.117819	0.525556	0.425629	-0.0708707
2872	1.23196	1.5225	1.27084	1.30412	1.47506	1.22771	1.20431	1.50508	1.4602	1.68858
2873	1.04965	1.04443	1.0775	0.976984	1.16856	1.10871	1.06024	1.173	1.22565	0.781441
2874	1.17464	1.3598	1.09992	1.21483	1.08473	1.10252	1.13598	1.36078	1.33212	1.18974
2875	-0.00523054	-0.22814	-0.28308	0.0114876	0.158247	0.180613	0.00657983	-0.0643687	-0.487802	-0.148845
2876	1.63903	1.46541	1.64188	1.45848	1.47813	1.59869	1.79588	1.93271	1.944	1.48224
2877	-0.414614	0.0763021	-0.25303	-0.16151	-0.785683	-0.6816	-0.716178	-1.36579	-0.871361	0.421265
2878	2.49842	2.56277	2.55301	2.631	2.26906	2.59975	2.30224	0.718843	0.570696	0.746685
2879	2.00447	2.19233	2.1348	2.13239	2.16723	2.13059	2.33145	1.76379	1.83359	1.94324
2880	-1.12026	-1.25214	-1.0085	-0.412258	-1.14087	-0.372998	-1.23152	-1.54255	-1.13244	-1.08468
2882	0.561249	0.373248	0.591753	0.683949	0.530513	0.52424	0.631763	0.439001	0.169268	0.959926
2885	1.02473	1.00756	1.09907	1.11235	1.02313	1.01995	1.08235	1.14942	1.16486	0.720466
2886	-0.23955	0.0928358	-0.0170491	-0.23776	-0.325633	-0.593762	-0.396471	-1.15113	-0.527803	-0.215839
2887	1.34144	1.31267	1.42404	1.42483	1.36714	1.43144	1.33055	0.661703	0.817499	1.81525
2888	1.04518	0.27916	-0.542184	0.144909	-0.0970586	-0.270323	-0.122426	-2.09926	-1.19329	-1.27629
2889	0.164748	0.0443037	-0.0359758	-0.812663	0.287858	-0.112708	0.309037	0.173076	0.158945	-0.171898
2890	0.0718954	-0.198557	-0.401222	-0.447855	-0.00319539	-0.657823	-0.189286	-1.89271	-0.94	-0.198018
2891	2.3795	1.89323	2.24024	2.01429	2.25712	2.13748	2.05381	-2.00143	-1.9665	2.27978
2892	-1.20368	-1.39833	-0.818468	-1.49409	-0.740854	-0.157582	-1.27706	-1.88879	-0.973304	0.512312
2893	-0.3181	-1.07358	-0.332812	-0.238813	-0.336828	-0.777341	-0.495771	-3.12575	-1.40939	-1.22627
2894	-0.154744	-0.444236	0.0572971	-0.0841082	0.262603	-0.326897	0.0554684	-0.677554	-0.171353	-0.653449
2895	-0.196426	-0.617339	-0.027067	-0.395714	-0.671854	-0.11157	-0.280226	-1.03759	-0.57868	-0.591936
2896	1.71357	1.56457	1.75718	1.45149	1.58095	1.62688	1.71283	1.94281	2.03967	1.64725
2897	0.0440667	-0.358416	-0.0684718	-0.186976	-0.187617	0.28902	-0.0364873	-0.950117	-0.272302	-1.41839
2898	-1.32559	-2.27871	-1.07642	-0.687987	-0.662182	-0.423734	-1.59094	-0.768242	-2.51149	-2.35537
2899	-2.0351	-1.85729	-1.42059	-1.45151	-0.902644	-1.73078	-0.965023	-2.1546	-1.93029	-2.02483
2900	0.566472	-0.283733	0.487891	0.39092	0.583758	0.40907	0.149198	-1.28203	-0.433053	-0.56528
2901	-1.06354	-1.0797	-0.195438	-1.12635	-0.96995	-0.834114	-1.09681	-0.43785	-0.687052	-0.703687
2902	-1.63629	-1.89415	-1.46564	-1.704	-1.28305	-1.55148	-1.266	-2.01077	-1.76225	-2.08759
2903	-0.241645	-0.320744	-0.10955	-0.452788	-0.241898	-0.422026	-0.285936	-0.802558	-1.02183	-0.089611
2904	-1.37107	-1.16617	-1.19536	-1.20017	-1.00799	-1.32229	-1.19348	-0.745602	-0.593801	-1.01109
2905	0.15744	-0.211623	0.252219	0.0924086	0.379493	0.0525218	0.157406	-0.113941	0.0607394	0.110798
2906	-0.787249	-0.727084	-0.577927	-0.918506	-0.456051	-1.15882	-0.603419	-1.15531	-0.526824	-0.927477
2907	1.5366	0.889023	1.30027	1.31915	1.45389	1.52371	1.35722	1.33496	1.43181	0.975873
2908	1.36733	1.96138	1.43453	1.21126	1.26025	1.26518	1.17623	1.29023	1.23676	1.43188
2909	-0.330653	0.0315358	0.163973	0.0627519	0.337087	0.00894249	-0.0815924	0.296201	-0.0232164	0.158044
2911	-1.46249	-1.66635	-0.54674	-0.941971	-0.271788	-1.46379	-1.2355	-2.15515	-1.86469	-0.700543
2912	-0.682623	-0.0968991	-0.574418	-1.01799	-0.514095	-1.0472	-0.746104	-0.599266	-1.36078	-0.877474
2913	-1.06949	-0.623892	-0.861601	-0.627911	-0.652573	-1.0063	-0.48011	-1.60704	-0.555869	-0.479658
2914	-0.0497751	-0.0433238	-0.41009	-0.089395	-0.448604	-0.520604	-0.029456	-0.924568	-0.0926781	-0.754414
2915	-0.714451	-1.32658	-0.911674	-1.78128	-0.673088	-0.747489	-0.87779	-1.14918	-0.973848	-0.601118
2916	0.0196367	-0.0394768	-0.373182	-0.0231062	0.195294	-0.0394362	-0.190185	-0.363135	-0.194422	-0.156875
2917	-1.35518	-1.64974	-0.965901	0.77546	0.277976	-0.69102	-0.478685	-1.50908	-1.36106	-1.22751
2918	-1.94253	-1.41554	-1.66754	-1.71412	-1.08365	-0.912944	-1.63045	-2.31266	-1.84062	-1.46751
2919	-0.815667	-0.785391	-1.24243	-1.02101	-0.752175	-0.295132	-0.540631	1.78835	2.0167	-1.09001
2920	-2.06615	-1.88289	-1.66774	-2.13922	-1.422	-1.95061	-1.63678	-1.15416	-1.48402	-2.28371
2921	-0.278904	-1.34589	-0.630567	-0.458393	-0.155147	-0.354676	-0.230053	0.145309	0.561013	-1.66388
2922	0.372536	-1.13894	-0.939519	0.769671	-1.48576	-0.810235	0.251776	-1.85796	-1.42282	-1.01577
2923	2.27076	1.82352	2.19948	2.03405	1.95108	2.15892	2.18726	2.02918	2.16037	2.46556
2925	0.359469	0.0962277	0.527084	0.146699	0.400065	0.184546	0.457734	-0.137396	-0.101943	0.0676526
2926	1.18665	0.822975	0.976804	1.17564	1.00503	1.09837	1.02181	1.1415	1.12613	1.17292
2928	-1.73929	-1.20205	-1.77016	-1.57918	-1.79167	-1.89847	-1.77774	-1.09767	-1.33485	-2.17809
2931	-0.209944	-0.281101	0.494044	0.0754077	0.503916	0.132644	0.280022	-0.345484	0.208065	-0.336406
2932	1.54087	1.49586	1.48114	1.36363	1.37756	1.38498	1.2868	1.42483	1.41597	1.04873
2934	1.79968	1.23645	1.61489	1.48574	1.16947	1.64961	1.84483	1.7985	1.8869	1.08364
2935	0.904925	1.1162	0.916272	1.00354	1.01086	1.08248	1.01217	1.57784	1.59269	0.889233
[truncated: 22,723 more rows]

## Sheet: 228112
id	GSM563806	GSM563807	GSM563808	GSM563809	GSM563810	GSM563811	GSM563812	GSM563825	GSM563826	GSM563829	GSM563834	GSM563837	GSM563844
1	NA	NA	NA	NA	NA	NA	NA	NA	NA	NA	NA	NA	NA
2	-0.0713948	-0.745898	1.05214	1.08898	-0.732605	-0.432475	-0.323777	1.9962	0.195596	-0.757483	-0.381698	-0.347183	NA
9	-1.23051	-1.26175	-1.56864	-0.981142	-0.340113	-1.31553	-0.539163	NA	NA	NA	NA	NA	NA
10	NA	NA	NA	NA	NA	NA	NA	NA	NA	NA	NA	NA	NA
12	NA	NA	NA	NA	NA	NA	NA	NA	NA	NA	NA	NA	NA
13	NA	NA	NA	NA	NA	NA	NA	NA	NA	NA	NA	NA	NA
14	0.119678	0.410434	-0.147717	-0.0648923	0.0415985	0.644799	0.319431	0.647853	0.708125	0.465327	0.771192	0.676089	1.21972
15	-1.04975	0.107574	-0.243031	NA	NA	NA	NA	NA	NA	NA	NA	NA	NA
16	NA	NA	NA	NA	NA	NA	NA	NA	NA	NA	NA	NA	NA
18	-0.938702	-0.593278	-1.08683	-1.17216	-0.73433	-1.02441	-1.00944	NA	NA	NA	NA	NA	NA
19	-1.15595	-1.01347	-1.08093	-0.4134	-0.508467	0.488951	-0.824857	-0.533756	-0.483143	-1.14349	-0.374617	NA	NA
20	-1.23447	-1.21135	0.0843274	-0.342675	-0.96183	-1.20216	-1.17636	-1.19959	NA	NA	NA	NA	NA
21	-0.555683	-0.570489	-0.718174	-0.479778	-0.244817	0.295515	0.251126	0.111891	-0.0990583	0.0903972	0.631961	NA	NA
22	-0.239668	0.464554	-0.208501	0.00956542	-0.198695	0.509	-0.00981863	0.239619	0.0971485	-0.132046	-0.0290663	0.0945709	0.628632
23	0.242116	0.417188	0.412219	0.735581	0.329366	1.25462	0.801466	0.736846	1.04376	0.641601	1.04003	0.65051	1.38558
24	NA	NA	NA	NA	NA	NA	NA	NA	NA	NA	NA	NA	NA
25	-0.123449	-0.215113	0.0365192	0.211642	0.0614989	-0.51862	-0.0264741	-0.169611	0.0646323	-0.11112	0.0019517	0.0164059	0.863423
26	0.646564	NA	NA	NA	NA	NA	NA	NA	NA	NA	NA	NA	NA
27	0.296664	0.76412	1.02284	0.472232	0.890025	0.590896	0.207447	0.58784	0.711278	0.396069	0.620456	0.278813	0.77742
28	-1.63358	-1.44157	-1.60835	-1.73525	-0.999406	NA	NA	NA	NA	NA	NA	NA	NA
29	-0.449564	-1.17649	-1.12571	-0.45447	-0.888921	-1.2511	-0.659644	-0.816767	-0.436649	-0.55965	-0.483368	-0.670389	NA
30	1.20498	0.565271	1.02108	1.11285	0.68025	1.04459	0.832358	1.35291	0.684246	0.986754	1.15063	0.813698	1.11986
31	-1.13003	-1.2207	-1.45678	-1.41029	-1.17575	NA	NA	NA	NA	NA	NA	NA	NA
32	-1.42278	-1.60296	NA	NA	NA	NA	NA	NA	NA	NA	NA	NA	NA
33	-1.71938	-1.4226	NA	NA	NA	NA	NA	NA	NA	NA	NA	NA	NA
34	-1.59014	-1.43007	-1.39418	NA	NA	NA	NA	NA	NA	NA	NA	NA	NA
35	-0.986876	-1.34812	-0.4965	-1.29471	-1.31758	-0.384003	-0.905135	-0.633068	-0.190419	-1.08794	-0.621699	0.669388	NA
36	-1.00893	-0.301739	-1.27782	-1.0998	-0.656232	-0.975825	-0.903566	-0.335009	-0.610395	-0.672751	-0.836587	-0.663537	-0.302214
37	2.35005	1.79754	1.97826	1.92948	1.69871	0.746132	1.41732	1.65831	1.77674	2.14033	1.7789	1.81001	1.80223
38	-0.18057	0.480799	0.307653	0.0412158	-0.288607	0.0817662	0.514298	0.539566	0.378988	1.00439	0.449334	0.133558	0.980805
39	NA	NA	NA	NA	NA	NA	NA	NA	NA	NA	NA	NA	NA
40	0.963795	0.0442731	-0.32329	-1.19826	-0.886287	0.455124	-0.380317	1.12827	NA	NA	NA	NA	NA
41	-0.766595	-0.990867	-0.397721	-0.851281	-0.40227	0.490602	1.13226	0.368805	0.620807	0.245734	0.571903	0.482329	-0.320458
43	-0.699007	-0.857177	-0.909195	-1.11276	-0.757483	0.295751	-0.211083	-0.0331262	-0.52223	-0.358845	-0.411169	NA	NA
47	1.20248	0.949911	0.879533	1.10452	1.3603	1.36499	0.929696	1.33816	0.839745	0.722579	1.6036	NA	NA
48	0.782699	0.786399	0.683772	0.561141	0.954907	0.639502	1.09291	1.21382	1.21806	0.879437	1.14383	1.18427	1.59412
49	-1.34526	-0.913017	-1.39848	NA	NA	NA	NA	NA	NA	NA	NA	NA	NA
50	0.252245	-0.259076	0.297121	0.331154	0.481638	1.07773	0.619275	0.792211	0.720481	0.397075	0.414232	0.366242	1.65673
51	NA	NA	NA	NA	NA	NA	NA	NA	NA	NA	NA	NA	NA
52	1.48623	1.66138	1.37715	1.2615	1.20135	1.90374	1.78941	1.71397	1.79527	1.92226	1.59645	1.68993	2.52214
53	-0.577075	0.157949	-0.578569	0.210686	-0.00134421	-0.0264741	0.149052	0.109473	0.47583	0.449182	0.198938	0.24172	0.837626
54	-1.41449	-0.950274	-1.6318	-1.36869	-0.818057	-0.990145	-1.0255	-0.343641	NA	NA	NA	NA	NA
55	-1.42066	NA	NA	NA	NA	NA	NA	NA	NA	NA	NA	NA	NA
56	0.00682639	-0.724528	-0.744875	-0.835365	-0.638368	-0.69581	-0.962476	-0.778488	-0.718671	-0.715323	-0.880944	NA	NA
58	-1.21135	-1.54956	-1.15868	-1.40541	-1.15092	-0.838894	-0.831709	-0.765506	-0.465997	-1.00633	-0.527335	-0.334407	NA
59	-1.34096	NA	NA	NA	NA	NA	NA	NA	NA	NA	NA	NA	NA
60	1.16581	1.02836	1.68287	1.55184	0.951597	1.80257	1.28888	1.28529	1.13538	1.66575	1.43874	1.11835	2.34875
70	-1.35534	-1.2699	-1.28291	0.157692	-0.890914	0.741676	-0.125105	-0.995043	-0.566229	-1.15682	NA	NA	NA
71	2.64913	2.16202	2.98845	2.71395	2.6215	3.27725	2.67734	2.69134	2.8213	2.95551	3.07856	2.61561	4.30074
72	NA	NA	NA	NA	NA	NA	NA	NA	NA	NA	NA	NA	NA
81	1.31197	0.914386	1.2139	1.49966	0.888222	0.557871	0.994315	0.494823	0.932033	0.434897	0.435207	0.353631	1.07069
86	0.846333	0.993637	1.14559	1.11857	1.20937	0.926625	1.22964	1.17657	1.01992	1.29994	1.60572	1.18763	1.35975
87	1.00416	0.486103	0.948215	0.59155	0.252346	1.46016	0.0856314	0.268816	1.30225	0.850809	0.807168	1.41857	2.03401
88	-0.89336	-0.713839	NA	NA	NA	NA	NA	NA	NA	NA	NA	NA	NA
89	NA	NA	NA	NA	NA	NA	NA	NA	NA	NA	NA	NA	NA
90	-0.238558	0.187771	0.214927	0.62466	0.432081	-0.0383951	-0.313427	0.445667	-0.0540406	0.446879	0.0521608	-0.0594506	0.19139
91	-0.681142	-0.691578	-1.20342	-0.738043	-1.17351	-1.2702	NA	NA	NA	NA	NA	NA	NA
92	-0.230383	0.0802994	-0.211921	-0.586899	-0.119212	0.0340059	-0.091265	-0.378939	0.469687	-0.140037	0.0228987	-0.684488	NA
93	0.542498	1.16139	1.30994	1.36798	1.25168	1.00497	1.27867	1.33425	1.06658	1.35469	1.49479	0.967195	0.950772
94	-0.621849	-0.919424	0.272856	-0.0157507	-1.33337	-0.0141819	-0.0829739	-0.0505924	-0.166846	-0.558256	-0.251369	0.0704436	1.54676
95	0.0373067	-0.493703	-0.114391	-0.0101461	0.369893	0.662778	0.157981	0.447185	0.255027	0.402521	0.553184	0.0129732	1.37783
97	-0.48029	-0.77712	-0.235383	-0.886287	-0.73353	-0.12334	0.00648581	-0.459558	-0.785805	-0.230115	-0.683451	-0.689891	NA
98	1.3019	0.79801	0.522855	0.782322	0.900089	2.17284	1.76521	1.9161	1.87702	2.0067	1.57911	1.49298	1.08979
100	-1.34787	-1.02447	-1.51527	-1.17615	-0.061098	NA	NA	NA	NA	NA	NA	NA	NA
101	-0.0294793	-0.372677	-0.976919	-0.672278	-1.24779	-0.272457	-0.348459	-1.18003	-1.16389	-0.242982	NA	NA	NA
102	-0.395878	-0.352717	-0.369349	-0.0118625	-0.345549	0.243729	0.0103196	0.049527	0.213657	0.124189	0.0383678	-0.080372	-0.195348
103	1.18565	1.64236	0.184123	0.607046	0.685274	1.76325	1.0146	1.9759	1.57636	0.889252	1.46966	1.28489	1.23636
104	NA	NA	NA	NA	NA	NA	NA	NA	NA	NA	NA	NA	NA
105	-0.604484	NA	NA	NA	NA	NA	NA	NA	NA	NA	NA	NA	NA
107	0.469481	-1.17908	-0.434514	-0.0502704	-0.311478	-0.15474	-0.31648	-0.967879	-0.801247	-0.890515	NA	NA	NA
108	0.164051	0.1485	0.637493	0.326906	0.474461	1.06623	1.17323	0.979634	0.682432	0.50555	0.750533	1.19205	-0.159889
109	-1.69281	-0.352912	-1.90144	-1.36969	-0.155754	-1.08332	-0.843336	-0.497087	NA	NA	NA	NA	NA
111	NA	NA	NA	NA	NA	NA	NA	NA	NA	NA	NA	NA	NA
112	0.871677	1.02114	1.64536	1.77619	1.63349	1.34489	1.93199	1.81372	1.05636	0.675878	0.831605	1.56387	0.870017
113	-1.44392	-1.0769	-1.29958	-0.95427	-0.0777982	NA	NA	NA	NA	NA	NA	NA	NA
114	-0.658285	NA	NA	NA	NA	NA	NA	NA	NA	NA	NA	NA	NA
115	-0.973478	-1.28207	-1.17615	-1.19792	-1.16074	-1.06949	NA	NA	NA	NA	NA	NA	NA
116	NA	NA	NA	NA	NA	NA	NA	NA	NA	NA	NA	NA	NA
117	-0.798038	-0.874161	-0.42705	-0.627272	-0.459714	0.175065	-0.477573	-0.421145	-0.568339	-0.267051	-0.298866	-0.616864	NA
118	1.53829	1.74811	1.32966	1.47901	1.47489	1.46037	1.29192	1.7878	1.23768	1.17171	0.934892	1.08206	1.24561
119	-1.54824	-1.61825	-1.24699	-1.21524	-1.11099	-1.37868	-0.836305	NA	NA	NA	NA	NA	NA
120	1.39255	1.25579	-0.147337	0.0389345	1.1738	0.692999	1.4512	0.364521	0.514429	0.241397	0.926667	-0.211179	NA
123	-1.30721	-1.23072	-0.80315	-1.22398	-1.03077	-0.697792	NA	NA	NA	NA	NA	NA	NA
124	0.900694	2.86827	-1.20868	-0.697954	NA	NA	NA	NA	NA	NA	NA	NA	NA
125	0.0076584	0.246012	NA	NA	NA	NA	NA	NA	NA	NA	NA	NA	NA
126	-0.133982	-1.03577	NA	NA	NA	NA	NA	NA	NA	NA	NA	NA	NA
127	NA	NA	NA	NA	NA	NA	NA	NA	NA	NA	NA	NA	NA
128	0.172616	0.940674	0.0578895	0.549548	0.283792	0.333404	0.709463	1.19119	0.459694	0.793927	0.455998	0.238912	0.439201
130	NA	NA	NA	NA	NA	NA	NA	NA	NA	NA	NA	NA	NA
131	-0.834895	NA	NA	NA	NA	NA	NA	NA	NA	NA	NA	NA	NA
132	0.449862	0.148256	0.424062	0.334401	0.709437	0.367166	1.03956	1.07435	1.10924	1.36647	1.17882	1.08355	0.633761
133	NA	NA	NA	NA	NA	NA	NA	NA	NA	NA	NA	NA	NA
134	NA	NA	NA	NA	NA	NA	NA	NA	NA	NA	NA	NA	NA
135	-1.36777	-1.32696	-1.21956	-1.5264	-1.27125	-0.651329	-1.19113	-0.856504	-0.62776	NA	NA	NA	NA
136	NA	NA	NA	NA	NA	NA	NA	NA	NA	NA	NA	NA	NA
140	-1.19611	-1.07392	-1.36519	-0.608041	-0.231313	0.116793	-0.791207	-0.988482	NA	NA	NA	NA	NA
141	NA	NA	NA	NA	NA	NA	NA	NA	NA	NA	NA	NA	NA
142	2.5092	2.25602	2.07039	2.14979	2.73168	3.28264	2.84759	3.04983	2.8589	2.89805	3.17653	2.87598	3.82649
143	-0.763287	-1.1204	-0.827322	-1.37936	-0.630166	-0.758823	-1.23599	-1.00582	NA	NA	NA	NA	NA
146	NA	NA	NA	NA	NA	NA	NA	NA	NA	NA	NA	NA	NA
147	-0.998229	-1.05969	-0.768079	-0.947089	-0.577679	-0.746154	-0.721034	-0.964472	-0.836258	-0.797903	-0.809431	-0.822168	NA
148	-1.39461	NA	NA	NA	NA	NA	NA	NA	NA	NA	NA	NA	NA
150	0.312657	0.275492	0.151256	0.0470668	0.506632	0.241515	0.76984	0.268958	0.259012	0.260797	0.454506	0.180036	-0.0805175
151	-1.46397	-1.5961	-1.7813	-1.39212	-1.06974	-1.10105	NA	NA	NA	NA	NA	NA	NA
152	-0.750858	-0.819579	-1.11048	-0.592844	-0.688687	NA	NA	NA	NA	NA	NA	NA	NA
153	-1.57949	NA	NA	NA	NA	NA	NA	NA	NA	NA	NA	NA	NA
154	-1.3412	-0.852859	NA	NA	NA	NA	NA	NA	NA	NA	NA	NA	NA
155	-1.42136	-1.17317	-1.12129	-1.14035	-0.856263	-1.02148	-0.620544	-1.15337	-1.06986	-1.09388	NA	NA	NA
156	-0.509424	-0.234302	-0.506522	-0.453754	-1.26631	-1.21985	-1.01495	-0.361347	-0.517419	NA	NA	NA	NA
157	-1.23267	-1.09699	-1.1998	-1.2536	-1.259	-1.20028	-0.956462	-0.952616	-0.938965	-0.694559	-1.20286	-0.969126	NA
158	NA	NA	NA	NA	NA	NA	NA	NA	NA	NA	NA	NA	NA
159	-0.00774079	-0.191778	-1.08732	-0.389849	-0.21276	1.14466	-0.0881576	-0.424816	0.371987	0.608253	0.394154	-0.0359352	-0.149148
160	-0.424424	-0.361741	-0.380662	-0.688447	-0.440627	-0.64305	-0.143969	-0.573528	-0.282692	-0.548867	-0.676066	-0.66823	NA
161	0.773113	0.594584	0.0840316	0.317809	0.874098	0.0395555	0.508912	0.208361	0.674471	0.578366	0.352186	0.507987	0.28222
162	-1.24574	-0.809203	-1.62771	-1.17846	NA	NA	NA	NA	NA	NA	NA	NA	NA
163	1.54067	1.24872	0.392047	0.802644	0.609418	0.997877	0.447385	0.785804	1.02332	1.10806	0.821879	0.391435	1.45054
164	-0.731009	-0.753907	-1.28848	-1.14684	-1.17765	-1.11447	-1.18044	-0.8703	-0.72174	-0.871032	-0.150179	NA	NA
165	-1.68197	-0.538652	NA	NA	NA	NA	NA	NA	NA	NA	NA	NA	NA
166	0.562191	1.07865	-0.643813	0.400371	-0.49725	0.904247	-0.0311531	0.457173	-0.0563871	0.136161	-0.727031	0.202529	0.760153
167	-0.0954809	NA	NA	NA	NA	NA	NA	NA	NA	NA	NA	NA	NA
172	NA	NA	NA	NA	NA	NA	NA	NA	NA	NA	NA	NA	NA
173	NA	NA	NA	NA	NA	NA	NA	NA	NA	NA	NA	NA	NA
174	NA	NA	NA	NA	NA	NA	NA	NA	NA	NA	NA	NA	NA
175	-1.20196	0.785992	-1.36195	-0.674565	-1.0292	-0.343116	-0.601122	0.362436	-0.17828	-0.544637	0.152647	-0.590534	0.0645079
176	-0.847514	-0.84272	-0.264005	-0.579601	-0.529425	-0.200824	0.0434734	-0.33135	-0.255905	-0.406753	-0.205713	-0.252895	-0.738255
177	-0.577537	-1.12687	-0.876171	-0.18554	-0.882672	-1.05623	NA	NA	NA	NA	NA	NA	NA
178	-0.481603	0.168208	0.44816	0.191142	0.184716	-0.307193	0.191111	0.0667626	-0.452076	-0.00902927	-0.332713	-0.372734	-0.870349
181	-1.42278	NA	NA	NA	NA	NA	NA	NA	NA	NA	NA	NA	NA
182	-0.839932	-0.328764	-0.0829113	-0.135106	-0.960754	-0.424304	-0.65368	-1.10682	-0.804239	-0.855879	-0.690774	-0.192716	NA
183	-1.03629	-1.44319	-1.00424	-0.972279	-0.987983	-0.21711	-0.297131	-0.71487	-0.211586	NA	NA	NA	NA
185	-1.70186	-1.26548	-1.45485	-0.828906	-0.330968	NA	NA	NA	NA	NA	NA	NA	NA
186	-1.4675	-1.78889	-1.24757	-1.32115	NA	NA	NA	NA	NA	NA	NA	NA	NA
187	-1.37137	NA	NA	NA	NA	NA	NA	NA	NA	NA	NA	NA	NA
189	-1.447	-1.5037	NA	NA	NA	NA	NA	NA	NA	NA	NA	NA	NA
190	-1.66226	NA	NA	NA	NA	NA	NA	NA	NA	NA	NA	NA	NA
191	-0.746325	-0.502841	-0.0983798	-0.19077	-0.420845	0.259056	0.00595576	-0.518219	0.789086	0.602841	0.598038	0.186214	0.815027
196	-0.970321	-1.00899	-1.28352	-1.43796	-1.02395	-1.09438	-0.842247	0.0508989	-0.686325	NA	NA	NA	NA
197	NA	NA	NA	NA	NA	NA	NA	NA	NA	NA	NA	NA	NA
199	NA	NA	NA	NA	NA	NA	NA	NA	NA	NA	NA	NA	NA
202	-1.67021	-1.27088	-1.37927	NA	NA	NA	NA	NA	NA	NA	NA	NA	NA
203	0.170304	0.321386	-0.903213	-0.575797	0.00343389	0.964387	0.682806	0.757498	0.774435	0.641859	0.733253	0.360333	1.27146
204	0.911812	1.10316	1.12695	1.05709	1.26523	1.63786	1.4551	1.32868	1.45468	1.31452	1.4361	1.33717	1.81556
205	-1.54147	-1.03647	-1.59418	-1.05754	-0.854104	-1.26735	-0.971408	-1.00115	-0.836211	NA	NA	NA	NA
207	0.145182	0.157354	0.130848	0.447867	-0.00651167	-0.458901	-0.367646	-0.574733	-0.0913071	-0.512767	-0.407522	-0.586899	0.754161
208	-1.30432	-1.04509	-1.58274	-1.18907	-1.11289	-1.25849	NA	NA	NA	NA	NA	NA	NA
210	NA	NA	NA	NA	NA	NA	NA	NA	NA	NA	NA	NA	NA
211	-0.35537	-0.383426	-0.35565	-0.255779	0.0687111	0.40115	0.333098	0.284563	0.290292	0.38966	0.516875	0.0556848	0.929116
212	-1.13197	-1.52689	NA	NA	NA	NA	NA	NA	NA	NA	NA	NA	NA
213	NA	NA	NA	NA	NA	NA	NA	NA	NA	NA	NA	NA	NA
214	1.9524	1.81438	2.30639	1.81068	2.06993	1.64305	1.98066	2.39686	1.57627	2.12551	1.97157	1.73286	1.49399
215	-0.4817	-0.089878	-0.0710038	0.0967366	0.109625	0.879762	1.13872	1.00492	0.602961	0.281067	0.974923	0.96099	-0.545667
216	2.9736	3.00316	1.42101	2.11211	2.65359	3.13631	2.31115	2.75939	2.57977	3.25147	2.59114	2.61863	2.84717
217	-1.5857	-1.31885	-1.17216	NA	NA	NA	NA	NA	NA	NA	NA	NA	NA
218	-1.30862	-1.1028	-1.0003	-1.20657	-1.18859	0.240912	-0.791655	-1.1132	-0.997054	-0.874896	NA	NA	NA
219	-0.831615	-1.34869	-0.031646	-0.659023	-0.667995	-0.842105	-1.06299	-0.514824	-0.323777	-0.225922	-0.62686	0.154745	NA
220	-0.393368	-0.0166622	0.825122	0.205571	0.420462	-0.0597351	-0.523403	0.503815	NA	NA	NA	NA	NA
221	-0.452417	-1.27397	-0.486295	-0.673697	-0.510151	0.188207	1.17961	0.140527	-0.139638	0.406265	0.330914	-0.443515	NA
222	NA	NA	NA	NA	NA	NA	NA	NA	NA	NA	NA	NA	NA
223	1.89231	2.42261	1.87207	1.89418	2.12887	2.28123	2.18783	3.25713	2.02536	1.92943	2.46187	2.09893	1.73169
224	-0.141168	-0.247577	-0.373475	0.361146	0.324882	-0.809476	-0.904477	-0.21834	-0.0830572	-0.0703661	0.177208	-0.119885	0.183044
225	-1.11632	NA	NA	NA	NA	NA	NA	NA	NA	NA	NA	NA	NA
226	NA	NA	NA	NA	NA	NA	NA	NA	NA	NA	NA	NA	NA
228	NA	NA	NA	NA	NA	NA	NA	NA	NA	NA	NA	NA	NA
229	-1.30206	-0.306662	-1.22028	NA	NA	NA	NA	NA	NA	NA	NA	NA	NA
230	-0.561046	-1.35295	-0.661783	-0.138752	-0.696699	0.118907	1.1366	0.271535	0.059964	0.598597	-0.160365	NA	NA
231	0.133327	-0.19516	0.192629	0.21612	-0.207261	0.845959	0.819766	0.77672	0.74859	0.625698	1.01507	0.910836	0.83445
238	-0.509259	-1.22993	0.496552	0.645036	1.05912	-0.0790427	0.841898	-0.0972784	0.410349	1.23952	0.625106	0.4838	0.241045
239	-1.0061	-1.14192	-1.12327	-1.13132	-0.954804	-0.894611	-0.719583	-0.836963	-0.954644	-0.698561	-0.985992	-0.909297	NA
240	-1.04326	-1.05933	-1.07004	-1.17223	-1.37919	-1.24574	-1.08862	-1.20133	NA	NA	NA	NA	NA
241	NA	NA	NA	NA	NA	NA	NA	NA	NA	NA	NA	NA	NA
242	-0.067041	-0.173487	-0.117285	-0.351128	-0.0250045	-0.0752729	0.365921	0.278517	0.0845536	0.0223594	-0.0498077	NA	NA
244	NA	NA	NA	NA	NA	NA	NA	NA	NA	NA	NA	NA	NA
245	0.22652	0.162053	-0.411496	-0.19768	-0.968964	-0.705393	-1.05563	-0.609365	-0.456963	NA	NA	NA	NA
246	-0.531148	NA	NA	NA	NA	NA	NA	NA	NA	NA	NA	NA	NA
247	NA	NA	NA	NA	NA	NA	NA	NA	NA	NA	NA	NA	NA
248	-1.28207	-1.3847	-1.23188	-1.2267	-0.962746	-0.661121	-0.799438	-0.844142	-1.03425	-1.02062	-0.829606	0.361469	NA
249	-1.10588	-1.33345	-0.71133	-1.23433	-0.833676	-0.885147	-1.17209	-0.307857	-0.433814	-0.611612	-0.601122	NA	NA
250	-0.591147	-0.738635	-0.306317	-0.442131	-0.323479	0.325539	0.0061451	-0.300341	-0.417908	-0.254223	-0.0359946	-0.503104	NA
251	-1.37229	-1.56947	-1.05082	-1.02159	-0.870788	-0.723403	-0.60727	-0.619465	-0.782161	-1.05396	-0.358312	NA	NA
257	-1.42057	-1.37995	-0.939333	-1.0813	NA	NA	NA	NA	NA	NA	NA	NA	NA
258	-1.03274	-1.27457	-1.04762	-1.18584	-1.0707	-0.916651	-0.373532	-0.66635	-0.884057	-1.04003	-0.891363	NA	NA
259	NA	NA	NA	NA	NA	NA	NA	NA	NA	NA	NA	NA	NA
262	0.858881	1.23422	0.578835	1.11193	0.845278	1.89417	1.33623	1.52568	1.43629	0.931518	1.18268	1.16407	1.76624
265	-1.6297	-1.661	-1.53986	-1.24816	-1.10299	NA	NA	NA	NA	NA	NA	NA	NA
266	-1.49179	-0.986987	-0.725904	-0.798986	-0.727533	-1.06968	-1.00655	-0.727533	-1.02938	-0.878431	NA	NA	NA
267	NA	NA	NA	NA	NA	NA	NA	NA	NA	NA	NA	NA	NA
268	0.913569	0.254796	0.307612	0.78165	-0.652562	0.3561	-0.858283	-0.884107	-0.871569	0.152744	-0.172178	-0.464957	0.286342
269	-0.353414	-0.294953	-0.252144	-0.299788	-0.0662423	-0.137115	0.440102	0.0914338	-0.0597758	-0.000485762	-0.0926752	0.0309513	-0.499829
270	NA	NA	NA	NA	NA	NA	NA	NA	NA	NA	NA	NA	NA
271	1.12254	1.15396	1.1154	0.996839	1.47285	0.325029	0.814924	0.599246	1.20402	0.690841	0.878434	0.833149	0.751507
272	0.707636	1.01835	0.732328	1.08228	1.19975	0.749939	0.608124	1.03557	1.18512	1.60177	1.28349	1.07179	1.18609
273	0.678309	0.523592	-0.480546	0.814639	0.458324	0.192087	0.177444	0.196398	-0.512999	0.506599	0.225684	0.466583	-0.719624
274	0.451139	0.409847	0.384654	0.0268134	0.30549	1.05475	0.118907	0.00565274	0.298861	0.238028	0.210352	0.588759	1.13053
275	-0.520122	-0.281969	-0.303562	-0.0303848	0.0673653	-0.149753	0.386752	0.277557	0.240721	0.406228	0.333643	0.0803693	0.307762
276	NA	NA	NA	NA	NA	NA	NA	NA	NA	NA	NA	NA	NA
278	NA	NA	NA	NA	NA	NA	NA	NA	NA	NA	NA	NA	NA
279	NA	NA	NA	NA	NA	NA	NA	NA	NA	NA	NA	NA	NA
280	0.47591	0.167716	-0.23288	0.154939	0.241911	-1.08308	-0.744577	-0.458619	-0.616531	-0.980427	-0.687486	-1.06666	-0.592663
283	NA	NA	NA	NA	NA	NA	NA	NA	NA	NA	NA	NA	NA
284	0.51875	1.06509	1.03425	0.971778	0.668546	1.74529	-0.376017	0.399394	1.19106	0.640867	0.732207	0.536057	NA
285	1.8272	-1.3666	0.19966	-1.38913	-1.2418	-0.483561	1.58177	-1.11587	0.0401397	-0.740795	-1.23621	-0.349793	NA
286	-1.18694	-0.964094	NA	NA	NA	NA	NA	NA	NA	NA	NA	NA	NA
287	0.458719	1.25146	0.516843	0.4091	0.473867	-0.891662	-0.330805	-0.0378589	0.162213	0.268445	-0.415636	-0.709976	0.249439
288	NA	NA	NA	NA	NA	NA	NA	NA	NA	NA	NA	NA	NA
290	-1.15132	-1.05331	-1.0425	-0.886883	-0.906098	-0.437871	-0.363235	-0.614789	-0.567952	-0.641524	-0.745898	-0.578889	-0.585607
291	1.7136	1.48639	0.966739	0.893038	1.66166	1.40761	1.55895	2.16427	1.47767	2.06288	1.5095	1.6925	1.99681
292	2.23714	2.02931	2.30621	2.24764	2.11793	3.21889	2.91838	2.7862	2.61292	1.9714	2.6032	2.69033	3.83751
293	NA	NA	NA	NA	NA	NA	NA	NA	NA	NA	NA	NA	NA
301	-1.47085	NA	NA	NA	NA	NA	NA	NA	NA	NA	NA	NA	NA
302	0.245865	-0.484622	0.805252	0.832784	-0.00974159	2.20497	1.27581	1.77066	1.89064	0.694116	1.39856	1.52625	1.10559
303	NA	NA	NA	NA	NA	NA	NA	NA	NA	NA	NA	NA	NA
304	NA	NA	NA	NA	NA	NA	NA	NA	NA	NA	NA	NA	NA
305	NA	NA	NA	NA	NA	NA	NA	NA	NA	NA	NA	NA	NA
306	-0.538891	-0.720204	-0.381669	-0.836493	-0.930131	-0.834473	NA	NA	NA	NA	NA	NA	NA
307	-0.535351	0.165232	0.217176	0.516526	-0.292284	1.04604	0.647161	1.38297	0.733296	0.0472479	0.0339324	0.20049	1.57191
308	0.0521968	0.197507	-0.951284	-1.13553	-0.549798	-0.402653	-0.0319616	-0.163747	-0.319865	-0.368582	-0.895012	NA	NA
309	1.22622	0.898833	0.0998559	-0.525888	0.650245	0.853216	0.637723	0.688759	1.33104	0.700302	0.888887	0.766764	0.599944
310	0.943926	0.657077	0.241779	0.215093	0.594263	0.180146	0.495705	0.855028	0.790459	0.755149	0.569114	0.6222	1.13449
311	-0.528379	0.276765	-0.628737	-0.146376	0.253695	-0.294325	0.478085	-0.342371	0.171619	0.243656	NA	NA	NA
312	NA	NA	NA	NA	NA	NA	NA	NA	NA	NA	NA	NA	NA
313	-1.43508	-1.24728	-1.26586	-1.14894	-1.27532	-0.864563	NA	NA	NA	NA	NA	NA	NA
314	-1.29981	-1.50835	-1.26983	-0.790938	-1.47141	-1.27789	-1.07167	-1.20966	NA	NA	NA	NA	NA
316	-0.565843	-0.872742	-1.19314	-0.428774	-0.890814	-0.282692	-0.0145883	NA	NA	NA	NA	NA	NA
317	-0.414443	-0.407789	-0.738508	-0.270235	-0.212472	-0.83913	-0.444099	-0.696376	-0.286476	-0.50784	-0.436344	-0.204286	-0.390313
318	0.42005	0.493011	0.0422542	-0.0660377	0.948023	0.62293	0.54576	0.479585	0.923065	0.521337	1.20547	0.551084	0.770844
319	-0.526493	-1.29733	-0.0106858	-0.761421	0.680314	-1.16195	0.100489	-0.226506	0.306107	-0.454781	-0.265501	NA	NA
320	-0.404892	-0.354755	-0.0564682	0.0901898	-0.0889125	0.217628	0.181447	0.243949	-0.00432634	0.282388	-0.129676	-0.0444537	-0.165386
321	-1.34575	NA	NA	NA	NA	NA	NA	NA	NA	NA	NA	NA	NA
322	1.22825	1.06925	-0.504515	0.518238	0.788541	-0.238878	0.847632	0.484353	0.544025	1.32163	-0.00119154	0.567535	-0.0974901
323	NA	NA	NA	NA	NA	NA	NA	NA	NA	NA	NA	NA	NA
324	0.347117	-0.235481	-0.863497	-0.633974	-0.121274	0.174086	-0.427261	-0.437138	-0.386024	0.0309144	-0.0931176	-0.282305	0.494297
325	NA	NA	NA	NA	NA	NA	NA	NA	NA	NA	NA	NA	NA
326	-1.14159	-1.23556	-1.0945	-1.12123	-1.33441	-0.422588	-1.14559	-1.46694	-0.95203	-1.08998	NA	NA	NA
327	0.981135	0.956048	0.811336	0.988093	1.15352	0.44635	0.698627	1.1628	0.940687	1.18974	1.58368	0.753148	1.54696
328	1.64222	1.25433	2.08551	1.94799	1.47727	2.18451	2.29889	2.02322	2.31299	2.17463	2.20747	2.1769	2.5932
329	-0.161045	0.353046	0.0615346	-0.122491	0.0785503	-0.482983	-0.218123	-0.324859	-0.135283	0.418463	0.179471	0.100232	NA
330	-1.45531	-1.25486	-1.03775	-1.51459	-1.11689	-0.075976	-0.806331	-0.699372	-0.723195	NA	NA	NA	NA
331	NA	NA	NA	NA	NA	NA	NA	NA	NA	NA	NA	NA	NA
332	-0.655922	-0.573847	0.216904	-1.83762	-1.17514	0.662293	-0.675869	-0.786161	-0.860114	0.943602	NA	NA	NA
333	-0.451424	-0.521694	-0.676264	-0.285023	-0.810116	-0.844379	-0.577608	-0.721616	-0.997837	-0.662718	-0.698683	NA	NA
334	NA	NA	NA	NA	NA	NA	NA	NA	NA	NA	NA	NA	NA
335	NA	NA	NA	NA	NA	NA	NA	NA	NA	NA	NA	NA	NA
336	NA	NA	NA	NA	NA	NA	NA	NA	NA	NA	NA	NA	NA
337	-0.779018	-1.20566	-0.592555	-1.54733	-0.817457	-1.39736	-1.25975	NA	NA	NA	NA	NA	NA
338	NA	NA	NA	NA	NA	NA	NA	NA	NA	NA	NA	NA	NA
339	-1.02579	-1.13521	-1.10676	-1.63136	-1.11238	-1.32274	NA	NA	NA	NA	NA	NA	NA
341	-0.370855	-0.968909	1.44043	1.09488	1.07058	-0.642592	0.494744	-1.2418	-0.116702	0.388633	-0.204096	1.06597	NA
343	-1.44591	NA	NA	NA	NA	NA	NA	NA	NA	NA	NA	NA	NA
344	-0.991367	-1.38879	-1.20196	-0.957855	-0.613273	NA	NA	NA	NA	NA	NA	NA	NA
345	NA	NA	NA	NA	NA	NA	NA	NA	NA	NA	NA	NA	NA
346	-1.40898	-1.63336	-1.37716	NA	NA	NA	NA	NA	NA	NA	NA	NA	NA
347	-0.332386	-0.914551	-1.1725	-1.01364	-1.01924	-0.22765	-0.253321	-1.12507	-1.10569	NA	NA	NA	NA
348	NA	NA	NA	NA	NA	NA	NA	NA	NA	NA	NA	NA	NA
350	1.14137	0.574756	1.77857	1.64653	1.36384	1.79391	2.4011	1.5153	1.90741	1.74483	1.86123	1.83262	2.01432
351	1.14551	0.582267	0.675777	1.11051	0.415997	1.97681	1.78998	1.62697	1.58211	2.06702	1.39648	1.55324	1.45431
353	0.825161	0.723383	0.835479	0.834829	0.844229	1.98336	1.76426	2.03763	1.62263	1.77862	1.70412	1.37095	2.29246
354	NA	NA	NA	NA	NA	NA	NA	NA	NA	NA	NA	NA	NA
355	-1.29695	-0.820826	-0.134621	-0.931901	NA	NA	NA	NA	NA	NA	NA	NA	NA
356	NA	NA	NA	NA	NA	NA	NA	NA	NA	NA	NA	NA	NA
357	-0.74705	-0.833816	-0.481347	-0.277535	-0.111206	-0.286813	-0.534536	-0.109445	-0.235211	-0.861321	-0.586109	-0.413489	0.0709557
358	NA	NA	NA	NA	NA	NA	NA	NA	NA	NA	NA	NA	NA
359	-0.625324	-0.581706	-0.579922	-0.460372	-0.412507	-0.185121	0.0810506	-0.154154	-0.215329	-0.240953	-0.0648514	0.0846405	-0.692262
360	-1.37573	0.477425	-0.987872	-1.21149	-0.666976	-1.03618	-0.735172	NA	NA	NA	NA	NA	NA
361	-1.24421	-0.906148	NA	NA	NA	NA	NA	NA	NA	NA	NA	NA	NA
362	-0.94693	-1.18735	-0.869276	-0.534095	-0.632804	-0.572396	0.117918	-1.05694	-0.527941	-0.735594	-0.578213	-0.564159	-0.62047
363	-0.0748389	-1.29124	0.91858	0.489457	0.937126	0.333643	1.66202	0.485053	1.23237	0.898602	0.985084	0.835742	0.365549
364	NA	NA	NA	NA	NA	NA	NA	NA	NA	NA	NA	NA	NA
366	-0.596429	NA	NA	NA	NA	NA	NA	NA	NA	NA	NA	NA	NA
367	-1.54855	-1.36952	-1.51088	-0.872791	-1.35107	NA	NA	NA	NA	NA	NA	NA	NA
368	-1.47609	-1.32091	-1.30276	-0.941384	-0.806058	-1.13488	-1.0266	-0.940752	-0.802289	NA	NA	NA	NA
369	0.451256	0.462544	0.276454	0.443013	0.331714	0.845806	0.423893	0.784065	0.470295	-0.158938	0.00303508	0.365087	1.15743
372	1.64951	1.59948	1.04401	1.44534	1.95588	1.09029	1.90582	2.0096	1.88351	1.96155	2.02608	1.61556	1.59358
373	0.224667	-0.297236	-0.618795	-0.492275	0.0806139	-0.246183	-0.613939	-0.386111	-0.469723	-0.590534	-0.228528	-0.502513	-0.613902
374	-1.16262	-1.03729	-0.928052	NA	NA	NA	NA	NA	NA	NA	NA	NA	NA
375	3.39313	3.56017	2.90708	3.36665	3.7899	3.96765	3.88494	3.89843	3.86038	3.70562	4.05676	3.79909	3.96781
377	0.931169	0.576128	0.13746	0.516679	0.636084	0.0797226	-0.119494	0.322396	0.168558	0.46633	0.717894	0.256372	0.611203
378	2.36071	2.22595	2.74968	2.41711	2.8496	2.63601	3.00424	2.76616	2.61147	2.62896	3.26649	2.67023	2.9229
379	NA	NA	NA	NA	NA	NA	NA	NA	NA	NA	NA	NA	NA
381	1.43361	1.52422	1.76609	1.69824	1.40222	2.33099	2.1192	1.94642	2.03003	1.71038	1.79195	2.21158	2.47225
382	0.604311	0.295986	0.219449	-0.116248	0.227504	0.443036	0.435422	0.547566	0.701813	0.718939	0.884475	0.36673	1.75517
383	NA	NA	NA	NA	NA	NA	NA	NA	NA	NA	NA	NA	NA
384	NA	NA	NA	NA	NA	NA	NA	NA	NA	NA	NA	NA	NA
387	NA	NA	NA	NA	NA	NA	NA	NA	NA	NA	NA	NA	NA
388	-0.19768	0.818577	0.0791279	0.146875	-0.294115	0.00221791	-0.634541	-0.729751	0.277938	-0.279981	-0.522062	-0.417967	-0.116183
389	-1.03974	0.0519806	-0.165751	0.159667	0.170954	0.57908	0.672519	0.666414	0.433693	-0.691417	0.472552	0.662852	0.957852
390	-1.72944	-0.54966	NA	NA	NA	NA	NA	NA	NA	NA	NA	NA	NA
391	NA	NA	NA	NA	NA	NA	NA	NA	NA	NA	NA	NA	NA
392	-0.66463	-0.421536	-0.902606	-0.927689	-0.361206	-0.861659	-0.610432	-0.656967	-1.00323	0.000867061	NA	NA	NA
393	-1.52096	-0.995713	-1.39126	-0.574272	-0.557247	-0.621289	-0.846706	-0.81981	-1.06654	-0.867038	NA	NA	NA
394	0.54998	0.742728	1.09539	1.00573	0.974883	0.940529	0.994165	0.850976	0.869033	0.939244	0.996741	0.780314	0.417783
395	0.0634585	1.51038	-0.608408	-1.06053	0.276751	1.2369	-0.208048	1.20902	-0.11424	0.0150756	0.387405	-0.0929491	1.21351
396	NA	NA	NA	NA	NA	NA	NA	NA	NA	NA	NA	NA	NA
397	-1.55762	-1.31632	-1.448	-1.47994	NA	NA	NA	NA	NA	NA	NA	NA	NA
398	-0.801202	-0.517786	NA	NA	NA	NA	NA	NA	NA	NA	NA	NA	NA
399	-1.34234	NA	NA	NA	NA	NA	NA	NA	NA	NA	NA	NA	NA
400	1.08622	1.02767	1.05523	0.748199	1.33599	1.23309	1.31069	1.31278	1.26194	1.31499	1.56803	1.60764	0.707885
401	-1.59461	NA	NA	NA	NA	NA	NA	NA	NA	NA	NA	NA	NA
402	0.331274	0.989226	0.294656	0.503649	-0.25485	0.616027	0.628438	0.619744	0.472987	0.721793	0.652283	0.207919	0.288312
403	1.85202	2.33759	1.19609	1.91065	2.15263	2.35033	2.48269	2.49415	2.38793	2.52559	2.23224	2.30881	2.42791
405	-0.0440339	0.275761	0.0061451	-0.119516	-0.167439	-0.391621	-0.587366	-0.694478	-0.567037	-0.936552	-0.607637	-1.03082	0.884834
406	-1.37978	-1.22577	-0.880352	NA	NA	NA	NA	NA	NA	NA	NA	NA	NA
407	-1.39229	-1.39264	-1.41239	NA	NA	NA	NA	NA	NA	NA	NA	NA	NA
408	NA	NA	NA	NA	NA	NA	NA	NA	NA	NA	NA	NA	NA
409	-0.802334	-0.691136	-0.86767	-0.900891	-1.34364	-1.19334	-0.354112	-0.550144	-0.172063	-0.899833	-0.0547884	NA	NA
410	-0.760337	-0.240928	-0.533349	-0.1854	-0.567952	0.160116	0.124805	-0.0286337	-0.0740334	-0.0503911	-0.0141625	0.852321	NA
411	-1.69186	NA	NA	NA	NA	NA	NA	NA	NA	NA	NA	NA	NA
412	-1.24538	-0.860742	-0.895463	-1.2687	-0.674012	-1.02781	-0.262106	-0.190045	-0.498555	-0.421055	-0.55836	-0.626747	-0.178997
414	-1.73178	-1.14349	NA	NA	NA	NA	NA	NA	NA	NA	NA	NA	NA
415	-1.47393	NA	NA	NA	NA	NA	NA	NA	NA	NA	NA	NA	NA
416	-1.5517	-1.69293	-1.48722	-0.831802	NA	NA	NA	NA	NA	NA	NA	NA	NA
417	3.73764	3.59966	3.77421	3.41883	3.71941	2.56567	2.29306	2.83497	2.36633	2.63321	2.70921	3.02964	2.27222
419	-0.229699	NA	NA	NA	NA	NA	NA	NA	NA	NA	NA	NA	NA
420	-1.2687	-1.46992	-1.25228	-1.06611	-1.26489	-1.09562	-1.1537	-1.20189	NA	NA	NA	NA	NA
421	0.481264	-0.153479	0.819097	0.390648	0.466986	0.269799	0.150333	-0.0966859	0.172917	0.605363	-0.289519	0.406376	0.509638
427	0.563727	0.199184	-0.06283	0.859966	0.161589	0.736201	0.140854	0.508813	0.366627	0.405786	0.21823	-0.0763898	1.1823
429	-1.28565	0.616605	-0.231582	-0.343531	-1.434	-0.962045	-0.319327	-0.291788	-0.640877	NA	NA	NA	NA
430	-1.57624	-0.909144	-1.00967	-1.17487	-1.0288	-0.793898	-0.839648	NA	NA	NA	NA	NA	NA
432	0.494141	-0.910213	1.81393	1.12724	2.21261	0.52719	2.41341	0.724115	1.93168	1.46374	1.91697	1.6322	1.09032
433	-0.616049	-1.46203	0.562876	-0.203716	0.624699	-0.77009	0.814117	-0.638976	0.365652	0.296512	0.09562	-0.0784203	0.270397
434	NA	NA	NA	NA	NA	NA	NA	NA	NA	NA	NA	NA	NA
435	-1.01177	-0.641601	-0.953363	-0.756534	-0.773467	-0.806331	-0.365693	-0.427654	-0.68957	-0.274223	-0.185749	-0.343227	NA
438	-0.995266	-1.58211	-1.77299	-1.13132	-1.10796	-1.04845	NA	NA	NA	NA	NA	NA	NA
439	1.05029	0.938621	0.991431	0.897793	0.49634	1.61399	1.25221	1.1728	1.09487	1.25242	1.083	0.964771	1.51943
440	1.26187	0.61823	0.653178	1.18989	1.36289	2.05619	1.09532	0.974311	1.54304	1.2916	1.65066	1.5971	1.26609
443	NA	NA	NA	NA	NA	NA	NA	NA	NA	NA	NA	NA	NA
444	-1.67776	NA	NA	NA	NA	NA	NA	NA	NA	NA	NA	NA	NA
445	NA	NA	NA	NA	NA	NA	NA	NA	NA	NA	NA	NA	NA
460	NA	NA	NA	NA	NA	NA	NA	NA	NA	NA	NA	NA	NA
462	NA	NA	NA	NA	NA	NA	NA	NA	NA	NA	NA	NA	NA
463	0.420062	0.47373	0.00629654	0.224353	0.377556	-0.603276	-0.341848	-0.483272	-0.205285	-0.214752	-0.326782	-0.735468	NA
466	0.222137	0.541108	0.139347	0.13915	0.231743	0.10523	0.495984	0.284746	0.639807	0.367704	0.279729	0.806458	NA
467	0.355451	-0.621774	-0.989591	-0.603971	-1.25952	-0.852237	-0.941911	-0.802606	NA	NA	NA	NA	NA
468	1.38573	1.05154	1.3647	1.66585	1.87585	1.63607	1.92047	1.6569	1.91769	1.78672	1.65156	1.87284	2.1616
471	0.123722	0.27586	0.161301	0.317458	0.0865518	0.697192	0.397646	0.623212	0.661566	1.04964	0.959483	0.317295	1.54628
472	-0.500123	0.253608	0.0378191	-1.05331	-0.303721	-0.932475	-0.992257	-0.345909	-0.476521	-0.400594	-0.833957	NA	NA
473	0.633751	1.38667	0.515216	1.04616	0.819593	0.499458	0.571677	0.379393	0.877489	0.762415	0.570061	0.54822	0.275011
474	-1.11797	-1.11555	-1.24326	-1.27419	-1.16355	-1.07325	-1.17663	-1.34396	-1.23267	-1.0153	NA	NA	NA
475	1.16564	0.822851	0.545337	0.747102	1.24896	1.93653	1.58318	1.73824	1.50645	1.22858	1.863	1.6214	2.12341
476	NA	NA	NA	NA	NA	NA	NA	NA	NA	NA	NA	NA	NA
477	-0.946612	-0.946347	-0.391534	0.24175	-0.575584	-0.310038	-0.205499	-0.282072	-0.524443	-0.702296	-0.518553	-0.134092	-0.923289
478	-0.840404	-1.2352	-0.855543	-0.809385	-1.15423	-0.6619	NA	NA	NA	NA	NA	NA	NA
479	NA	NA	NA	NA	NA	NA	NA	NA	NA	NA	NA	NA	NA
480	NA	NA	NA	NA	NA	NA	NA	NA	NA	NA	NA	NA	NA
481	NA	NA	NA	NA	NA	NA	NA	NA	NA	NA	NA	NA	NA
482	-0.598464	-0.780301	-0.58769	-0.15765	-0.638634	-0.326701	-0.145595	0.0353643	-0.0644835	-0.464265	-0.507082	-0.180825	-0.487714
483	0.489794	0.579763	0.666052	0.945499	0.28781	1.74903	0.466272	1.12148	1.26534	0.851911	1.05755	0.672049	2.52077
486	-1.53216	-1.27223	NA	NA	NA	NA	NA	NA	NA	NA	NA	NA	NA
487	0.465765	0.660174	0.854361	0.86648	0.936426	0.958231	1.20071	0.944593	0.856654	0.747281	0.688279	1.02652	-0.0891643
488	1.53042	0.83061	1.76007	1.91385	1.75293	2.01537	1.72073	1.15608	1.52783	1.68602	1.24015	1.19392	1.37299
489	-0.969343	-0.846991	-0.189062	-0.392174	-0.811534	-0.561605	-0.238582	-0.342289	-0.400007	-0.762679	-0.545289	-0.572467	1.25094
490	0.0426547	-0.110969	0.0453263	0.0728778	-0.289493	-0.235727	-0.618795	-0.818748	-0.294429	-0.452231	-0.20412	-0.329525	NA
491	-0.914397	-0.790759	-1.33265	-0.846896	-0.719417	NA	NA	NA	NA	NA	NA	NA	NA
492	-0.525518	-1.04127	-0.0488429	NA	NA	NA	NA	NA	NA	NA	NA	NA	NA
493	-1.46769	-1.59354	-1.37742	NA	NA	NA	NA	NA	NA	NA	NA	NA	NA
495	NA	NA	NA	NA	NA	NA	NA	NA	NA	NA	NA	NA	NA
496	-1.45632	-1.52778	-1.1831	-1.67056	-1.06871	NA	NA	NA	NA	NA	NA	NA	NA
498	1.41234	1.15343	0.671495	0.947852	1.00402	1.38316	1.44223	1.11252	1.47504	1.54969	1.13673	1.33767	1.71042
501	-0.833019	-0.0550109	-0.800749	-1.07818	-1.12616	-0.59288	-1.12033	-0.562024	-0.762549	NA	NA	NA	NA
506	2.86987	2.50721	2.59523	2.62536	2.79584	3.2538	2.61387	2.80201	2.74245	3.07196	2.63711	2.88326	3.50006
509	1.49539	1.40097	1.34027	1.32007	1.60625	1.48747	1.86464	1.81639	1.62072	1.9648	1.85586	1.58146	2.29315
513	1.39494	0.867444	1.85642	0.950915	0.879327	2.21288	2.0295	1.6866	1.81883	2.00729	1.90899	1.89821	1.63557
514	NA	NA	NA	NA	NA	NA	NA	NA	NA	NA	NA	NA	NA
515	NA	NA	NA	NA	NA	NA	NA	NA	NA	NA	NA	NA	NA
516	2.35941	2.02721	2.27881	1.97173	2.14592	3.12621	2.59214	2.63795	2.69425	2.73721	2.95268	2.55809	3.18141
517	NA	NA	NA	NA	NA	NA	NA	NA	NA	NA	NA	NA	NA
518	2.46258	2.41833	2.49353	2.12414	2.50217	3.17484	2.9223	2.9742	2.78933	2.87295	2.81078	2.73869	3.52593
521	2.02423	2.11674	2.05222	1.58847	2.14098	2.47912	2.16642	2.47221	1.92964	2.02301	1.92303	2.04807	2.06664
522	-0.95941	-1.17074	-0.905591	-0.894661	-0.442807	0.751524	-0.176549	-0.334271	-0.0223455	0.262694	0.387819	-0.247203	0.734564
523	1.88731	1.22655	1.54813	1.41174	2.01092	2.03627	1.6911	2.1674	1.59081	1.96855	1.97917	1.51213	2.5236
525	1.88943	0.732795	1.69598	1.78505	2.09176	2.45501	2.35255	2.99907	2.1369	2.03931	2.33433	1.74823	1.32627
526	2.3687	1.86884	1.00143	1.67694	1.52984	1.54665	1.26896	1.29099	1.86046	1.60062	1.72802	1.19421	2.13795
527	-1.03769	-1.20531	-1.44301	-1.29625	-0.825601	-1.11682	-0.798896	-1.00605	NA	NA	NA	NA	NA
528	0.337371	0.295792	-0.272892	-0.358817	-0.282124	-0.0968552	-0.197232	-0.2267	-0.0195773	0.214216	0.0727016	-0.441609	1.04313
529	2.71294	2.55492	1.92329	2.07238	2.36614	2.88742	2.91195	3.0697	2.81908	2.90098	2.87518	2.64903	3.34504
533	1.99306	2.08326	1.8736	1.93802	2.30328	3.51638	2.96789	2.64121	2.86205	2.60978	2.60093	2.88382	2.74004
534	0.72804	0.854293	0.238691	0.321453	0.952034	2.11281	0.912538	0.0298263	0.634971	0.650311	1.18623	-0.356966	0.844229
535	1.50507	0.893118	1.32407	0.865058	1.52875	0.867548	1.89642	1.09923	1.54575	1.29882	1.66678	1.20654	1.4292
537	NA	NA	NA	NA	NA	NA	NA	NA	NA	NA	NA	NA	NA
538	0.670359	0.37265	0.433168	-0.103374	0.618034	0.236701	0.269813	0.957554	0.528419	0.513882	0.642335	0.454611	0.878478
539	NA	NA	NA	NA	NA	NA	NA	NA	NA	NA	NA	NA	NA
540	-1.19667	-1.81787	-1.33361	NA	NA	NA	NA	NA	NA	NA	NA	NA	NA
545	0.0186126	-0.548419	0.146794	-0.146086	-0.0596335	-0.62746	-0.532976	-0.178927	-0.685087	-0.42829	-0.197138	-0.569325	-0.458213
546	0.158431	0.200352	0.456906	0.29356	-0.334927	0.0639567	0.153729	-0.441794	-0.448605	-0.107966	0.0518725	-0.91701	NA
547	0.733598	-0.0327115	0.654955	0.748412	0.631566	0.971378	0.670904	0.805939	0.866995	1.06876	0.270852	0.499702	1.75515
549	-1.00921	-0.742663	-1.13151	-1.21001	NA	NA	NA	NA	NA	NA	NA	NA	NA
550	0.188626	0.412976	0.583688	0.461329	0.382121	1.09113	0.855013	0.807239	0.869406	0.596117	0.589919	0.686955	1.59602
551	-1.01307	-1.32568	-1.04121	-0.642935	-0.827648	-0.920762	-0.90554	-1.03711	-1.01268	-0.815479	-0.8848	NA	NA
552	-1.73811	-1.18119	-1.09718	NA	NA	NA	NA	NA	NA	NA	NA	NA	NA
553	-1.51547	-1.40593	NA	NA	NA	NA	NA	NA	NA	NA	NA	NA	NA
554	-1.1748	-1.26773	-0.77136	-0.81355	-1.07532	-0.860114	-1.0914	NA	NA	NA	NA	NA	NA
558	-0.954751	-1.03204	-0.61405	-0.902354	-0.872106	-0.932579	-0.545358	-0.930391	-0.663576	-0.695931	-0.614345	-0.708582	NA
563	-1.70979	-1.14198	-1.38691	1.01787	NA	NA	NA	NA	NA	NA	NA	NA	NA
566	NA	NA	NA	NA	NA	NA	NA	NA	NA	NA	NA	NA	NA
567	NA	NA	NA	NA	NA	NA	NA	NA	NA	NA	NA	NA	NA
570	NA	NA	NA	NA	NA	NA	NA	NA	NA	NA	NA	NA	NA
571	NA	NA	NA	NA	NA	NA	NA	NA	NA	NA	NA	NA	NA
572	NA	NA	NA	NA	NA	NA	NA	NA	NA	NA	NA	NA	NA
573	2.40612	1.51995	2.2347	1.72814	2.50153	3.12677	3.34713	2.70077	2.87671	3.00428	2.75364	2.96921	2.73456
574	NA	NA	NA	NA	NA	NA	NA	NA	NA	NA	NA	NA	NA
575	NA	NA	NA	NA	NA	NA	NA	NA	NA	NA	NA	NA	NA
576	NA	NA	NA	NA	NA	NA	NA	NA	NA	NA	NA	NA	NA
577	1.36547	2.28301	0.541171	0.00134294	1.42231	2.03341	1.91886	1.76355	2.21473	1.92382	0.398241	1.59793	NA
578	-0.743258	-0.512203	-0.616012	-0.538925	-0.789015	0.602891	-0.448852	-0.35509	-0.108995	-0.205142	-0.46351	-0.278358	0.730208
579	-0.9354	-1.10299	-0.606095	-0.653449	-0.299577	-0.292154	-0.131673	0.0173041	-0.598246	-0.523503	-0.373932	NA	NA
580	-1.08167	-1.17047	NA	NA	NA	NA	NA	NA	NA	NA	NA	NA	NA
581	0.349472	0.496965	0.913491	0.478062	0.819829	1.04525	1.26568	0.98384	1.02673	0.882456	1.03093	1.16798	0.526489
582	0.324788	0.722011	0.211308	0.482906	-0.485168	0.259574	0.682825	0.275959	0.381251	-0.102735	-0.252469	-0.0103774	NA
583	-0.288269	-0.360025	-1.33821	-0.843194	-0.519755	-1.13495	-0.964472	-0.899783	-0.769696	-0.645648	-1.18872	-0.680943	NA
585	0.132237	0.755798	-0.663576	0.023066	0.469905	-0.114693	-0.0706129	0.316889	-0.0263956	0.208254	0.326357	0.235002	0.840092
586	-0.96658	-0.0505924	1.75048	-1.19031	0.171271	-0.645227	-0.468743	-0.354923	-0.365297	-1.05378	0.302237	NA	NA
587	-0.817504	-0.709443	-1.40168	-0.99683	-0.848228	-0.708746	-0.801564	-0.514293	-0.69468	-0.263979	-0.345272	-0.570171	-0.403536
590	-0.614345	NA	NA	NA	NA	NA	NA	NA	NA	NA	NA	NA	NA
593	0.383269	0.429004	0.0167428	0.247982	0.312493	0.936946	0.558549	0.580313	0.818333	0.801714	0.8803	0.644979	0.895252
594	-0.756706	-0.589813	-0.439861	-0.101926	-0.596792	-0.584998	-1.30791	-1.15099	-0.690292	0.0896363	0.299027	0.210382	0.560049
595	NA	NA	NA	NA	NA	NA	NA	NA	NA	NA	NA	NA	NA
596	-1.39874	-1.69792	-0.471466	-0.843099	-0.864078	NA	NA	NA	NA	NA	NA	NA	NA
597	NA	NA	NA	NA	NA	NA	NA	NA	NA	NA	NA	NA	NA
598	-0.368667	-0.268323	-0.412358	-0.238016	-0.251694	0.0455077	0.0270541	0.150786	-0.0741367	-0.206951	-0.132112	0.0706203	-0.0644427
599	0.727241	-0.0294597	-0.0192854	0.317634	0.649603	0.0785153	0.19743	0.0804916	0.459787	-0.00216525	0.290042	0.241926	0.604291
602	-0.0776324	-0.100863	0.451725	0.136358	0.319404	0.821172	0.896802	0.558111	0.940874	0.321911	0.587638	0.706011	0.534004
604	-1.10412	-1.35312	-1.07234	-1.02839	-0.748118	-1.14868	-0.868157	-1.19182	-0.902909	-0.937705	-0.924994	NA	NA
605	-0.457963	-0.880796	-0.106725	-0.06977	-0.624426	0.400495	-0.312946	-0.0618923	-0.0199473	0.132039	0.629714	NA	NA
606	-0.514791	NA	NA	NA	NA	NA	NA	NA	NA	NA	NA	NA	NA
607	-0.539232	-0.443176	-0.125149	-0.164771	-0.132002	0.369535	0.184544	-0.198294	-0.200303	-0.222789	-0.346158	0.506488	NA
608	-1.33562	-1.44937	NA	NA	NA	NA	NA	NA	NA	NA	NA	NA	NA
610	-1.63158	-1.52254	-1.39538	NA	NA	NA	NA	NA	NA	NA	NA	NA	NA
611	-0.994876	-0.624126	-0.600247	-0.50009	-0.284634	-0.628436	-0.650636	-0.607159	-0.530979	-0.718464	-0.509028	-0.399655	NA
613	-0.177772	-0.432293	-0.684049	0.0697015	-0.233541	0.645577	-0.51652	0.326584	-0.311878	-0.535181	-0.429531	-0.468553	0.174891
617	0.406904	0.570679	0.427287	0.480856	0.73403	1.14165	0.831675	1.29526	0.834148	1.11151	0.502919	0.578845	1.39026
622	-0.008106	-0.378595	0.488636	0.371859	0.0214101	0.0790929	-0.637116	0.123188	-0.233272	0.434528	0.132055	-0.514758	NA
623	NA	NA	NA	NA	NA	NA	NA	NA	NA	NA	NA	NA	NA
624	-1.2894	-0.916241	-1.6115	-0.827881	-0.373162	NA	NA	NA	NA	NA	NA	NA	NA
627	0.496586	0.0442186	-0.565036	-0.830774	0.747825	-1.08572	0.426133	0.347994	-1.13924	1.73505	-0.0782958	0.936828	NA
629	-1.10406	-0.633483	0.765338	0.156791	-0.141345	0.76543	-0.935662	NA	NA	NA	NA	NA	NA
631	-0.556204	-1.4242	-1.5569	-1.34722	-1.01821	-0.843099	-1.10456	-0.872693	-1.16201	-0.722946	-0.326186	NA	NA
632	NA	NA	NA	NA	NA	NA	NA	NA	NA	NA	NA	NA	NA
633	-0.431048	-1.32504	-1.11441	-1.25952	-1.30479	NA	NA	NA	NA	NA	NA	NA	NA
634	-1.71161	-1.35501	-1.56214	-1.22986	NA	NA	NA	NA	NA	NA	NA	NA	NA
635	-0.986158	NA	NA	NA	NA	NA	NA	NA	NA	NA	NA	NA	NA
636	-0.275839	-0.0406027	-0.286839	0.162101	-0.0695851	-0.314765	-0.343724	-0.575477	-0.306131	-0.18333	-0.420845	-0.488327	1.48208
637	-1.63927	-1.33425	-0.38118	-1.39624	-1.31514	-0.35565	-0.263422	NA	NA	NA	NA	NA	NA
638	0.0275907	-0.436649	0.865402	-0.859825	-0.561605	-1.06029	-1.12816	1.52278	NA	NA	NA	NA	NA
639	-1.44292	-0.845803	-0.980537	-1.0755	-1.34616	NA	NA	NA	NA	NA	NA	NA	NA
640	-1.02724	-1.29587	-0.8747	-1.3408	-1.20847	-0.992981	NA	NA	NA	NA	NA	NA	NA
641	-0.976754	-0.326484	-1.10374	-1.41669	-1.42057	-0.734077	0.302402	-0.176826	NA	NA	NA	NA	NA
642	NA	NA	NA	NA	NA	NA	NA	NA	NA	NA	NA	NA	NA
643	-0.531013	-0.657859	-0.200303	-0.426083	-0.141901	0.460112	0.591661	0.305764	0.0336751	-0.11026	-0.0445937	0.587719	-0.761464
644	-1.14967	-1.07788	-0.822446	-0.69848	-0.187148	0.0543739	-0.252845	0.170367	-0.424515	-0.103843	0.338998	0.775459	NA
645	-1.41143	NA	NA	NA	NA	NA	NA	NA	NA	NA	NA	NA	NA
646	-1.67531	NA	NA	NA	NA	NA	NA	NA	NA	NA	NA	NA	NA
648	0.593872	1.35773	0.178104	0.773055	0.263583	1.14451	0.334002	0.970857	0.414341	1.06121	0.572571	0.355464	NA
649	-0.386863	-0.0907394	-0.172844	0.0746905	-0.0497474	0.758112	0.568247	0.338231	0.319741	0.104583	0.398093	0.145068	-0.0889125
650	-1.30799	-1.0262	-1.21368	-0.556968	NA	NA	NA	NA	NA	NA	NA	NA	NA
651	NA	NA	NA	NA	NA	NA	NA	NA	NA	NA	NA	NA	NA
652	-0.839177	-1.21163	NA	NA	NA	NA	NA	NA	NA	NA	NA	NA	NA
653	-1.81693	NA	NA	NA	NA	NA	NA	NA	NA	NA	NA	NA	NA
654	NA	NA	NA	NA	NA	NA	NA	NA	NA	NA	NA	NA	NA
655	-1.71488	-1.36677	NA	NA	NA	NA	NA	NA	NA	NA	NA	NA	NA
656	NA	NA	NA	NA	NA	NA	NA	NA	NA	NA	NA	NA	NA
657	-0.304568	0.384377	-0.515689	0.247267	-0.264816	-0.463887	-0.122535	-0.0816824	0.224249	0.369995	-0.00620465	-0.022697	0.711463
658	-1.07953	-0.294639	-0.52404	NA	NA	NA	NA	NA	NA	NA	NA	NA	NA
659	NA	NA	NA	NA	NA	NA	NA	NA	NA	NA	NA	NA	NA
660	NA	NA	NA	NA	NA	NA	NA	NA	NA	NA	NA	NA	NA
661	-0.887529	-1.46092	-1.31451	-1.04626	-1.14782	-0.240211	-0.732983	-0.679672	-0.850708	-0.971299	-0.560941	NA	NA
662	0.822459	0.34578	-0.198341	-0.160501	0.513554	0.910936	0.424929	0.700499	0.679802	0.582866	1.03947	0.807048	0.75996
663	0.563986	0.434969	0.413037	0.785584	0.425507	1.54471	1.20235	1.65904	0.911727	0.652424	0.836607	0.807263	0.793547
664	-1.21072	-1.29109	-0.746751	-1.28764	-1.21729	-0.609659	NA	NA	NA	NA	NA	NA	NA
665	1.78983	1.49936	1.91733	1.86422	1.53328	1.79735	2.00598	1.45446	1.78078	1.88509	1.51989	1.21643	2.22825
666	-1.56018	-1.46871	-1.33796	-1.45651	-1.26027	-0.894962	NA	NA	NA	NA	NA	NA	NA
667	-0.220755	-1.2158	-0.258672	-1.19986	-1.40289	-1.16603	-0.866747	-0.298866	NA	NA	NA	NA	NA
668	-0.396433	-0.633785	-0.469154	-0.239668	-0.119104	-0.144659	0.230213	0.287921	-0.305972	-0.0209799	0.0037756	-0.197492	-0.378079
669	NA	NA	NA	NA	NA	NA	NA	NA	NA	NA	NA	NA	NA
670	0.730667	0.682788	0.600761	1.03781	0.906005	0.991163	1.22487	1.28005	1.18645	1.10097	0.843195	0.742361	1.51477
671	0.110285	0.207767	0.133805	0.0141188	0.256834	0.188004	0.453502	0.256618	-0.023674	0.385119	0.133541	0.231862	-0.693752
672	-1.31411	-0.99209	-1.25789	-0.253396	-1.10556	-1.03577	-0.432718	NA	NA	NA	NA	NA	NA
673	-1.16805	-0.870105	-1.1467	-0.841207	-1.23245	-1.05076	NA	NA	NA	NA	NA	NA	NA
675	-1.74511	NA	NA	NA	NA	NA	NA	NA	NA	NA	NA	NA	NA
676	NA	NA	NA	NA	NA	NA	NA	NA	NA	NA	NA	NA	NA
677	-0.146711	-0.164612	0.397088	1.12463	0.0923829	1.29897	1.41243	1.28767	1.53132	-0.311931	0.483336	0.969279	0.731187
678	-1.62044	-1.39624	-1.30377	-0.757095	NA	NA	NA	NA	NA	NA	NA	NA	NA
680	0.132567	NA	NA	NA	NA	NA	NA	NA	NA	NA	NA	NA	NA
682	1.93338	1.48334	2.58149	2.16658	1.91605	2.47613	2.56447	2.37695	2.33275	2.28132	2.2941	2.25821	1.50912
683	-0.843715	-0.792596	-0.712029	-0.832364	-0.719375	-0.592736	-0.448512	-0.648369	-0.768297	-0.743896	-0.813	-0.978014	-0.410813
684	-0.287827	-1.1725	-0.212784	0.0386055	-1.34412	0.658847	0.443686	0.25783	1.24853	-0.518019	0.314219	-0.0392099	NA
685	-1.47844	-1.68115	-1.4242	-1.29927	NA	NA	NA	NA	NA	NA	NA	NA	NA
686	0.357928	-0.153817	0.896454	0.254405	0.45672	0.518423	0.447937	0.845293	0.647341	0.984979	1.11559	0.846104	0.44562
687	-1.35107	NA	NA	NA	NA	NA	NA	NA	NA	NA	NA	NA	NA
688	-0.0527889	0.369829	0.403471	0.516406	0.406081	0.574418	0.600482	0.63065	0.627936	0.0984518	0.235918	0.665299	-0.244271
689	NA	NA	NA	NA	NA	NA	NA	NA	NA	NA	NA	NA	NA
690	NA	NA	NA	NA	NA	NA	NA	NA	NA	NA	NA	NA	NA
694	0.65473	1.6203	1.46566	1.83702	1.53416	2.28209	1.60465	2.27669	1.78972	1.60124	1.76248	1.59061	2.24148
695	-0.683052	-0.392145	-0.364562	-0.381324	-0.28215	-0.274377	-0.0917489	-0.112733	-0.185516	-0.540802	-0.397896	-0.172522	-0.639014
696	-0.0395082	0.541734	0.168765	-0.0620146	0.149506	0.495135	0.643658	0.93305	0.330741	0.0486413	0.229172	0.271322	-0.10634
699	-1.4282	NA	NA	NA	NA	NA	NA	NA	NA	NA	NA	NA	NA
701	NA	NA	NA	NA	NA	NA	NA	NA	NA	NA	NA	NA	NA
705	-0.741304	-0.593278	0.0376544	-0.0304242	-0.568445	0.233477	-0.112022	-0.238336	0.182246	0.0661773	0.0824638	-0.402388	0.633713
706	0.0494728	0.517682	0.0435643	-0.809476	2.35345	0.571882	-0.771536	1.25413	1.96726	1.12216	0.486508	1.27126	NA
708	NA	NA	NA	NA	NA	NA	NA	NA	NA	NA	NA	NA	NA
710	-0.395235	-1.38623	-0.474896	-0.217713	0.0327374	0.00837636	-1.0824	0.96798	-0.539334	-0.157085	NA	NA	NA
711	NA	NA	NA	NA	NA	NA	NA	NA	NA	NA	NA	NA	NA
712	0.451502	0.39176	0.68551	0.301714	-0.0546671	1.13286	1.60551	1.51401	1.9305	-0.184865	0.374903	1.18588	0.812589
713	-1.29048	-1.44573	-1.07252	-1.40315	-0.665177	-0.273071	-0.232096	0.0118825	-1.01981	-0.538516	-0.415815	NA	NA
714	-0.398511	-0.649521	-0.0652194	-0.319677	0.46385	0.911634	0.617594	1.09703	-1.05017	0.00635332	0.833497	NA	NA
715	-0.901345	-0.0273962	0.191157	0.353644	-0.571407	-1.12906	0.468527	-0.379427	-0.81861	NA	NA	NA	NA
716	0.447314	0.486024	0.720883	0.744231	0.73713	1.07041	1.42613	1.11666	1.12892	0.907844	0.980223	1.33106	0.300144
717	-1.32369	-1.55792	-1.10777	-1.31972	-0.409092	-0.680029	-0.926289	-0.30129	-0.975825	-0.742918	-0.39617	NA	NA
718	NA	NA	NA	NA	NA	NA	NA	NA	NA	NA	NA	NA	NA
719	-1.58559	-1.41239	-1.00751	-1.06744	-0.750772	-0.62626	-1.14238	-0.793853	NA	NA	NA	NA	NA
720	NA	NA	NA	NA	NA	NA	NA	NA	NA	NA	NA	NA	NA
721	NA	NA	NA	NA	NA	NA	NA	NA	NA	NA	NA	NA	NA
722	NA	NA	NA	NA	NA	NA	NA	NA	NA	NA	NA	NA	NA
725	NA	NA	NA	NA	NA	NA	NA	NA	NA	NA	NA	NA	NA
726	NA	NA	NA	NA	NA	NA	NA	NA	NA	NA	NA	NA	NA
727	-0.713386	-1.08992	-1.59835	-0.749102	-0.722281	-0.805967	-0.860307	-0.589597	-0.673342	-0.993371	NA	NA	NA
728	-1.66009	-1.61009	-1.52057	-1.14644	NA	NA	NA	NA	NA	NA	NA	NA	NA
729	-0.5128	-0.930131	NA	NA	NA	NA	NA	NA	NA	NA	NA	NA	NA
730	-1.60933	-1.02268	-1.614	-1.39581	-1.12276	-1.40125	-1.21807	NA	NA	NA	NA	NA	NA
731	NA	NA	NA	NA	NA	NA	NA	NA	NA	NA	NA	NA	NA
732	-1.66467	-1.54936	-1.35666	-1.27585	-1.35353	NA	NA	NA	NA	NA	NA	NA	NA
733	-0.539573	-1.54258	-1.20084	-1.16543	-0.609144	NA	NA	NA	NA	NA	NA	NA	NA
734	0.395746	0.814987	0.500779	0.47921	0.657808	0.940391	0.809668	1.74676	0.846417	0.655218	0.929165	0.489558	1.41892
735	NA	NA	NA	NA	NA	NA	NA	NA	NA	NA	NA	NA	NA
738	0.298792	0.338509	0.258537	-0.265273	0.300351	-0.288659	0.277331	0.146338	0.52623	0.630505	0.817143	0.416787	0.682742
740	0.0202921	0.283792	-0.294194	-0.415905	-0.018313	0.0940029	0.471488	0.310438	0.502919	0.420813	0.165901	0.071591	NA
741	-1.04579	-1.01057	-1.22584	-1.1831	-1.12958	-0.750172	-0.721325	-0.340883	-0.510052	-0.205094	-0.238878	-0.489264	NA
744	-0.346712	-0.722114	0.226758	0.0594279	-0.854728	0.367179	-0.225533	0.132369	0.0934345	0.19592	-0.117848	-0.16302	NA
745	-0.420725	-0.434788	-0.241101	-0.424123	-0.231802	-0.566335	-0.316399	-0.784648	-0.391156	-0.279466	0.0241064	-0.370855	-0.739228
746	2.16488	2.23203	2.47445	2.50063	2.77359	2.76374	3.41685	3.10702	3.22895	3.17313	3.42967	3.25566	3.18637
747	-0.731723	0.986439	-1.11549	0.173533	-0.102096	0.704702	0.539108	0.68088	0.253767	0.269186	-0.161816	0.288019	0.234913
750	NA	NA	NA	NA	NA	NA	NA	NA	NA	NA	NA	NA	NA
752	-0.866795	-0.646452	-0.472163	-0.825973	-0.837716	-0.320538	-0.771974	-0.877055	-0.638026	-0.23337	-0.694397	-0.653256	-0.862626
753	-1.61618	-1.27133	NA	NA	NA	NA	NA	NA	NA	NA	NA	NA	NA
754	-1.46685	-1.55957	-1.19383	-1.25982	-0.674368	-1.39049	-1.28703	-0.413847	-0.788346	-0.793404	-0.975333	NA	NA
755	-1.46305	-1.38572	-1.37237	-1.18433	-1.30932	-1.20594	-0.985881	-0.93211	NA	NA	NA	NA	NA
757	0.422686	0.633107	0.349603	0.660698	0.819207	1.37467	1.33698	1.29968	0.834473	0.379747	1.10181	0.801177	1.1106
758	NA	NA	NA	NA	NA	NA	NA	NA	NA	NA	NA	NA	NA
759	-1.1991	-1.36361	-1.08955	-0.882672	-1.18174	-0.915626	-1.00137	-0.905793	-1.14559	-0.707272	-1.19986	NA	NA
760	NA	NA	NA	NA	NA	NA	NA	NA	NA	NA	NA	NA	NA
761	-0.615271	-0.538754	-0.287905	-1.16516	-0.703639	-1.26324	-1.12404	-1.19917	NA	NA	NA	NA	NA
762	-1.23469	-1.61968	-0.40507	-1.31458	-1.07751	-0.423069	-1.2227	-1.16295	NA	NA	NA	NA	NA
763	NA	NA	NA	NA	NA	NA	NA	NA	NA	NA	NA	NA	NA
765	NA	NA	NA	NA	NA	NA	NA	NA	NA	NA	NA	NA	NA
766	0.698582	0.661995	0.877917	0.726319	0.860041	0.918538	1.3078	1.13557	0.882801	0.906363	1.03067	0.82264	0.0616059
767	-0.973696	-0.996216	NA	NA	NA	NA	NA	NA	NA	NA	NA	NA	NA
768	-1.6049	-0.894611	-1.40367	-0.721533	NA	NA	NA	NA	NA	NA	NA	NA	NA
770	0.411266	0.161813	0.972432	0.949993	0.650122	0.722212	1.28733	0.73695	0.706215	0.476525	0.813302	0.504081	1.37398
771	-1.24042	-1.16108	-1.44482	0.405822	-1.2855	-1.07089	-1.09992	-0.447924	-1.03158	NA	NA	NA	NA
773	NA	NA	NA	NA	NA	NA	NA	NA	NA	NA	NA	NA	NA
774	-1.37826	NA	NA	NA	NA	NA	NA	NA	NA	NA	NA	NA	NA
775	0.190413	0.2102	1.14149	0.273268	0.447585	0.369624	0.87372	0.352825	0.217537	0.263569	0.202636	0.170018	NA
776	0.740692	0.636822	1.38342	1.34289	1.41715	0.196783	-0.297105	1.13163	-0.236981	0.201395	0.637751	0.767421	NA
777	-0.891562	-1.32393	0.343007	-0.42829	0.516745	-0.573811	1.56093	-0.418387	0.969841	0.762256	0.463365	0.143078	0.592877
778	NA	NA	NA	NA	NA	NA	NA	NA	NA	NA	NA	NA	NA
779	NA	NA	NA	NA	NA	NA	NA	NA	NA	NA	NA	NA	NA
780	-1.06956	0.450776	-1.26616	0.903817	-0.0696673	0.655284	0.0581222	-0.51672	-0.244618	0.651161	NA	NA	NA
781	-0.663849	-0.0301091	0.652358	-0.411823	0.713053	-0.63947	0.621528	0.159923	-0.0532127	0.309101	0.208984	NA	NA
782	-1.47422	-1.48391	-1.20783	NA	NA	NA	NA	NA	NA	NA	NA	NA	NA
783	1.30665	1.08541	1.12493	1.42827	0.980864	-0.863013	0.247384	0.134218	0.384905	1.01343	0.626977	0.190133	0.0229731
784	-0.904679	-0.563914	-1.17317	-0.475979	-1.19952	-0.214032	-0.239964	-0.350377	-0.151861	0.259718	-0.772281	-0.651367	0.402731
785	-1.44764	-0.240631	-0.773994	-1.26332	-1.18454	0.00797966	-1.02799	-1.11587	NA	NA	NA	NA	NA
786	NA	NA	NA	NA	NA	NA	NA	NA	NA	NA	NA	NA	NA
788	-0.0835994	-0.598209	-0.388427	-0.513762	-0.0273177	0.515052	0.754921	1.01946	0.735693	0.854702	0.838135	0.691121	0.550968
790	-0.904831	-0.633861	-0.667525	-0.752531	-0.481892	0.769773	-0.508566	-0.469249	-0.308894	-0.477733	-0.313133	-0.275531	-0.352159
793	-0.968747	-0.986987	-0.516487	-1.02366	NA	NA	NA	NA	NA	NA	NA	NA	NA
794	0.880219	NA	NA	NA	NA	NA	NA	NA	NA	NA	NA	NA	NA
795	-1.66836	-1.34437	-0.749401	NA	NA	NA	NA	NA	NA	NA	NA	NA	NA
796	NA	NA	NA	NA	NA	NA	NA	NA	NA	NA	NA	NA	NA
797	-1.45834	-1.17989	-1.3593	-0.916138	-1.10399	-1.27684	NA	NA	NA	NA	NA	NA	NA
799	-1.12514	-0.806285	-0.285905	-0.629601	NA	NA	NA	NA	NA	NA	NA	NA	NA
800	-1.18146	-0.209576	-1.35501	NA	NA	NA	NA	NA	NA	NA	NA	NA	NA
801	1.29793	0.794186	1.29147	1.29639	1.29584	1.12633	2.03882	1.52973	1.12651	1.17221	1.13114	1.13577	0.587112
805	-1.7167	-1.30043	-1.35773	NA	NA	NA	NA	NA	NA	NA	NA	NA	NA
808	-1.64072	-1.69245	-1.53495	-1.39332	-0.909042	-1.03478	-0.629827	NA	NA	NA	NA	NA	NA
810	NA	NA	NA	NA	NA	NA	NA	NA	NA	NA	NA	NA	NA
811	0.481967	0.00750718	0.849865	0.249512	0.32472	0.763928	0.726136	0.557704	1.10441	1.02607	0.928333	0.806099	0.342467
813	0.162549	0.236701	0.155728	0.320658	0.431507	0.170098	0.643772	0.0512236	0.421442	-0.0619738	0.527395	0.76925	1.03615
814	-0.644271	-1.11175	-0.797092	NA	NA	NA	NA	NA	NA	NA	NA	NA	NA
815	-0.566616	-0.528076	-0.875288	-0.600685	-0.33871	-0.92035	-0.646567	-0.837245	-0.994541	-0.87794	-0.430653	-0.377993	NA
816	0.014963	-0.342068	-0.351852	-0.576187	-0.0269841	-0.311291	-0.0996099	-0.548006	-0.00371384	-0.334189	-0.119971	-0.231557	-0.887131
817	-0.667133	0.669823	-0.345217	0.118354	-0.343337	0.410031	-1.06353	0.307612	-0.927637	-0.783803	-1.05987	-1.04132	NA
818	NA	NA	NA	NA	NA	NA	NA	NA	NA	NA	NA	NA	NA
819	2.09327	1.74155	0.963943	1.08087	1.87417	2.48041	2.02345	1.87339	1.66915	1.61904	2.544	2.21206	2.50054
820	-1.10733	NA	NA	NA	NA	NA	NA	NA	NA	NA	NA	NA	NA
821	3.49944	2.63346	2.82405	2.95296	3.34183	3.22141	3.33411	3.13086	2.91249	3.00672	3.6088	3.14577	3.50604
822	-0.397574	-0.969615	-0.580207	-0.595595	-0.920144	-0.669565	-1.18522	-0.888623	NA	NA	NA	NA	NA
823	-1.1496	-0.418626	-0.698156	-0.716603	-1.02062	-1.06359	-1.16315	-1.07483	-0.804058	NA	NA	NA	NA
824	-1.68725	-1.33321	-0.890116	NA	NA	NA	NA	NA	NA	NA	NA	NA	NA
825	-0.965336	-0.223735	-1.6908	-0.723528	-1.08216	-0.98887	-0.938492	-0.598609	-0.670704	-0.944021	NA	NA	NA
826	0.227176	-0.15121	0.0996334	0.373287	0.151013	0.855951	0.882368	0.535384	0.250312	0.570638	0.0695248	0.268702	NA
827	0.244051	0.371834	0.383684	0.471682	0.430765	0.0587485	0.437313	0.627239	0.18959	0.116406	0.36988	0.446279	-0.226311
828	-0.735257	-0.841585	-0.139372	-0.540153	-0.808016	-1.01143	-1.07277	-1.26728	-1.0104	NA	NA	NA	NA
829	1.24945	1.54813	1.70744	1.75179	1.7567	2.027	1.94995	1.93734	1.74037	1.44862	1.78164	1.88303	1.66035
830	1.17955	1.2216	1.37027	1.46637	1.36967	2.00419	2.41694	1.77037	1.55152	1.63442	1.8825	1.98347	1.37004
831	1.22719	0.475944	0.459346	0.351834	0.93979	1.98391	0.5506	0.907751	0.992143	0.284087	1.41916	1.13876	1.89263
832	1.90932	1.85052	1.6439	1.74099	1.96201	2.08798	1.94358	1.64284	2.05102	1.97365	2.09234	1.78747	2.44196
833	0.406597	-0.1295	-0.348237	0.0269615	-0.0141625	-0.428501	-0.487875	-0.902657	-0.0155762	0.328377	0.0361894	-0.197515	-0.0302469
834	NA	NA	NA	NA	NA	NA	NA	NA	NA	NA	NA	NA	NA
835	-0.657277	-0.881981	-0.331322	-1.00447	-0.420905	-1.07264	-0.940489	-1.28955	-0.645074	0.0169487	NA	NA	NA
836	-1.15555	-0.846706	-1.01924	-1.11867	-0.936185	-0.813367	-1.10852	-0.664786	-0.658984	-0.791565	-1.07161	-0.312252	NA
837	-1.54379	-1.08868	-0.477573	-0.634768	-0.642706	-0.464045	-0.138176	-0.671255	-0.716149	0.0118073	NA	NA	NA
838	NA	NA	NA	NA	NA	NA	NA	NA	NA	NA	NA	NA	NA
839	-0.245562	-0.829513	-0.436436	-0.657083	0.161749	0.217055	-0.449564	-0.423159	-0.0030635	-0.309586	0.0600533	0.167636	-0.668191
840	-0.661978	-0.47118	0.126602	-0.635184	-0.628061	-0.145707	-0.0194995	-0.0802681	-0.64431	0.0769557	-0.331759	1.39368	NA
841	-1.31089	-1.02096	-0.680784	-1.06702	-0.810985	NA	NA	NA	NA	NA	NA	NA	NA
842	0.678795	0.924886	0.469182	0.978813	1.16001	1.27023	0.839014	1.21418	0.741197	0.692187	0.771316	0.7908	0.715442
843	NA	NA	NA	NA	NA	NA	NA	NA	NA	NA	NA	NA	NA
844	-1.57959	-1.4841	-1.31057	-1.13787	-1.0507	-1.12983	-0.806968	NA	NA	NA	NA	NA	NA
845	NA	NA	NA	NA	NA	NA	NA	NA	NA	NA	NA	NA	NA
846	NA	NA	NA	NA	NA	NA	NA	NA	NA	NA	NA	NA	NA
847	-0.152602	0.0872979	-1.10834	-0.49059	-1.05569	-0.563634	-0.978616	-0.0164682	NA	NA	NA	NA	NA
856	NA	NA	NA	NA	NA	NA	NA	NA	NA	NA	NA	NA	NA
857	-1.26825	NA	NA	NA	NA	NA	NA	NA	NA	NA	NA	NA	NA
858	-0.383167	-0.822724	0.796382	-0.6389	1.4474	-1.35897	-0.283029	-0.0409811	-0.602874	-0.305177	NA	NA	NA
859	NA	NA	NA	NA	NA	NA	NA	NA	NA	NA	NA	NA	NA
860	-1.5445	-1.29247	-1.10745	-0.939385	NA	NA	NA	NA	NA	NA	NA	NA	NA
861	-0.408144	-0.559615	-0.41707	-0.347599	-0.127792	-0.196761	0.0450903	-0.313855	-0.104205	-0.237671	-0.358312	NA	NA
862	-1.88059	NA	NA	NA	NA	NA	NA	NA	NA	NA	NA	NA	NA
863	-1.38427	NA	NA	NA	NA	NA	NA	NA	NA	NA	NA	NA	NA
864	1.86267	0.191684	2.84644	2.427	3.25786	3.85103	2.59024	3.68125	3.44896	3.73996	3.34024	2.52605	NA
865	-0.661121	0.583709	-0.186821	-0.0778604	0.0938996	0.366088	-0.0237718	0.549222	0.300585	0.43824	0.634299	0.15339	1.14446
866	-0.897721	-0.695285	-0.372278	-0.494938	-0.353442	-0.359744	0.0152255	-0.233664	-0.880007	-0.515024	-0.441886	NA	NA
867	-1.08683	NA	NA	NA	NA	NA	NA	NA	NA	NA	NA	NA	NA
868	-1.54571	-1.31553	-1.45844	-1.55946	-1.34023	NA	NA	NA	NA	NA	NA	NA	NA
869	0.975103	0.295889	-0.539232	-0.326565	1.77794	-0.919784	0.0351625	-0.0756037	NA	NA	NA	NA	NA
871	-0.723362	-0.46669	1.02017	0.731455	-0.443884	1.46376	0.861786	1.0272	0.926709	0.288242	0.535726	0.3118	1.34999
873	NA	NA	NA	NA	NA	NA	NA	NA	NA	NA	NA	NA	NA
874	-0.932683	-1.52531	-1.07004	-1.06353	-1.31482	-0.780876	-0.338079	NA	NA	NA	NA	NA	NA
875	-0.289284	-1.26848	-0.0119398	-1.18085	-1.19148	-1.14743	0.507822	NA	NA	NA	NA	NA	NA
881	NA	NA	NA	NA	NA	NA	NA	NA	NA	NA	NA	NA	NA
883	-0.273557	-0.0741367	-0.00976085	-0.252144	-0.12753	0.316876	-0.34541	-0.310598	0.203891	0.231713	0.383949	0.0390076	0.239677
885	-1.35025	NA	NA	NA	NA	NA	NA	NA	NA	NA	NA	NA	NA
886	-0.920607	-0.99739	-0.640649	-0.676343	-0.590317	-0.625137	-0.562689	-0.599009	-0.545083	-0.691458	-0.687606	-0.371196	NA
887	NA	NA	NA	NA	NA	NA	NA	NA	NA	NA	NA	NA	NA
889	1.21662	0.945348	0.687862	0.580833	0.887857	0.955939	1.07876	1.20147	1.02839	0.627297	1.04532	1.18597	0.87274
890	-0.308521	-0.307033	-0.665412	-0.916958	-0.910977	-0.151345	-0.137159	-1.25767	-0.314684	-1.19487	-0.109595	NA	NA
891	0.170114	-0.280703	-0.0453739	-1.01878	-0.469723	1.03381	-0.952936	-0.0425561	-1.03042	-0.527705	-0.331895	-0.642783	0.726632
892	-0.592374	-0.496109	-0.899682	-0.388456	-0.642477	-0.18426	0.000848021	-0.715984	0.142866	-0.392029	-0.196078	-0.407996	0.0159377
894	0.315209	-1.3256	-0.474355	0.897641	0.786579	-1.18461	-0.560417	-0.0586178	0.433586	0.402867	-0.490364	-0.673421	NA
896	-1.22756	-1.48136	-1.46111	-1.37615	NA	NA	NA	NA	NA	NA	NA	NA	NA
898	-1.11543	-1.32904	-0.465965	-1.12578	-0.10711	NA	NA	NA	NA	NA	NA	NA	NA
899	-1.4431	-1.28002	-1.47581	-1.71865	-0.648983	-1.29594	-1.23332	-1.20875	NA	NA	NA	NA	NA
900	0.449499	0.184669	-0.127311	0.437741	0.510802	0.759339	0.0164433	0.0666917	0.446467	-0.157763	0.8234	0.378443	1.50649
901	-0.480194	0.695089	-0.458025	0.0438188	-0.167622	0.00567168	-1.19176	-0.292284	-0.473815	-0.359997	-0.444623	-0.774829	-0.3153
902	0.942494	0.234454	0.269343	0.24925	0.752565	1.25234	1.31967	1.37034	0.955104	0.576527	1.04319	1.4474	1.83229
904	1.32744	1.1987	1.31807	1.27493	1.71212	1.51048	1.55357	1.46382	1.26582	1.1826	1.30565	1.45619	1.32499
905	-0.191379	0.0926589	-0.191309	-0.00781766	-0.638368	0.566316	-0.209242	0.168145	0.0297156	-0.261575	-0.290222	-0.0802681	0.130997
908	-0.870056	-1.0766	-0.870544	-0.871129	-1.06539	-0.716232	-0.8119	-0.831615	-0.920865	-1.06173	-0.818702	NA	NA
909	NA	NA	NA	NA	NA	NA	NA	NA	NA	NA	NA	NA	NA
910	NA	NA	NA	NA	NA	NA	NA	NA	NA	NA	NA	NA	NA
911	0.0442913	0.160837	0.505418	0.503716	0.492776	0.41019	0.659847	0.436374	0.414378	0.284255	0.376427	1.0629	-0.04812
912	-1.661	-1.13501	-1.18201	-0.790446	-0.804693	-0.915575	-1.44992	-0.890365	NA	NA	NA	NA	NA
913	NA	NA	NA	NA	NA	NA	NA	NA	NA	NA	NA	NA	NA
914	-1.28116	-1.20987	-1.00486	-0.746325	-1.12462	-0.775225	-0.914858	-1.18385	NA	NA	NA	NA	NA
915	-1.24428	-0.815571	-1.18481	-1.08973	NA	NA	NA	NA	NA	NA	NA	NA	NA
916	NA	NA	NA	NA	NA	NA	NA	NA	NA	NA	NA	NA	NA
917	-1.21836	-1.27163	NA	NA	NA	NA	NA	NA	NA	NA	NA	NA	NA
919	-1.49705	-0.750643	-1.20209	NA	NA	NA	NA	NA	NA	NA	NA	NA	NA
920	-1.60706	NA	NA	NA	NA	NA	NA	NA	NA	NA	NA	NA	NA
921	NA	NA	NA	NA	NA	NA	NA	NA	NA	NA	NA	NA	NA
922	NA	NA	NA	NA	NA	NA	NA	NA	NA	NA	NA	NA	NA
923	-1.20545	-1.13048	-1.25678	-1.26818	-0.984998	-1.35831	-1.02309	-1.01884	-0.896867	-1.22035	-0.994485	NA	NA
924	0.247238	0.29338	0.634145	0.135453	0.506974	1.26565	1.15876	0.972259	1.01601	1.03444	0.670655	1.04877	1.01981
925	-1.49456	-1.39771	-1.48466	-1.21814	-1.22556	-1.28177	-1.23224	-1.12244	NA	NA	NA	NA	NA
926	NA	NA	NA	NA	NA	NA	NA	NA	NA	NA	NA	NA	NA
928	1.17166	1.25795	1.45313	1.29245	1.47233	1.32667	1.65389	1.5417	1.29919	1.41389	1.41002	1.35953	1.04085
929	-1.58591	-0.789641	-1.12719	-1.33627	-0.608408	0.129606	-0.00268116	-0.58532	-0.942807	-0.130487	-0.277406	NA	NA
930	-1.62242	-1.58369	NA	NA	NA	NA	NA	NA	NA	NA	NA	NA	NA
931	NA	NA	NA	NA	NA	NA	NA	NA	NA	NA	NA	NA	NA
932	NA	NA	NA	NA	NA	NA	NA	NA	NA	NA	NA	NA	NA
933	-1.28971	-1.03135	-1.20126	NA	NA	NA	NA	NA	NA	NA	NA	NA	NA
939	-1.15509	NA	NA	NA	NA	NA	NA	NA	NA	NA	NA	NA	NA
940	-1.10663	-1.17047	-0.88599	-1.31577	-1.11036	-0.924426	-0.634277	-1.00492	-1.24545	-0.858187	-0.773071	NA	NA
941	-1.6545	NA	NA	NA	NA	NA	NA	NA	NA	NA	NA	NA	NA
942	-1.51176	-0.999518	-0.932996	NA	NA	NA	NA	NA	NA	NA	NA	NA	NA
943	-0.377706	-0.385244	-0.174384	-0.345134	-0.260135	-0.222208	-0.208764	-0.273276	-0.467763	-0.288425	-0.292859	-0.256433	-0.693148
944	NA	NA	NA	NA	NA	NA	NA	NA	NA	NA	NA	NA	NA
945	NA	NA	NA	NA	NA	NA	NA	NA	NA	NA	NA	NA	NA
946	NA	NA	NA	NA	NA	NA	NA	NA	NA	NA	NA	NA	NA
947	-1.61367	-1.16268	NA	NA	NA	NA	NA	NA	NA	NA	NA	NA	NA
948	-1.04403	-0.566897	-0.974842	-1.49936	-0.778886	-0.961023	-0.70132	-0.924012	-0.997949	0.203845	NA	NA	NA
949	-1.4211	-1.66261	-1.73538	-1.22749	-1.29155	NA	NA	NA	NA	NA	NA	NA	NA
950	NA	NA	NA	NA	NA	NA	NA	NA	NA	NA	NA	NA	NA
951	-0.985274	-0.973096	-1.0504	NA	NA	NA	NA	NA	NA	NA	NA	NA	NA
952	-1.32568	-1.38495	-1.16953	-1.12065	-0.996271	-0.952456	-1.1204	-1.21956	-0.924426	-0.933257	-0.746965	NA	NA
953	-0.913273	-1.11017	-0.964148	-1.28154	-0.771536	-1.21843	-0.667642	-0.64122	-0.796236	NA	NA	NA	NA
954	NA	NA	NA	NA	NA	NA	NA	NA	NA	NA	NA	NA	NA
955	-0.0103774	-0.0792918	-0.0484011	-0.201842	0.0614811	-0.00582101	0.132666	-0.0440938	-0.0905502	0.0812252	-0.0532531	-0.0827029	-0.203431
956	-0.923134	-1.31395	-1.21305	-0.927896	-0.620954	-0.546629	-0.488327	-0.914039	-0.788301	-0.395965	-0.724361	-0.0864613	NA
957	0.760849	0.863761	1.12861	0.963647	1.20266	1.00949	1.21923	0.936849	0.950307	0.963593	1.10184	0.966417	0.801787
958	-1.59995	-1.39341	-0.991979	-0.912303	-0.797497	NA	NA	NA	NA	NA	NA	NA	NA
959	-0.64042	-0.728872	-0.54282	-1.09134	-0.442807	0.315101	0.0763065	-0.118519	-0.441916	-0.603094	-0.341599	-0.346019	-0.700143
960	-1.5775	-0.955713	-0.332577	-0.652446	0.347811	-0.581135	0.869742	-0.213	-0.289076	NA	NA	NA	NA
961	-0.685406	-1.10815	-0.792013	-0.764896	-0.334982	-0.074529	-0.687846	-0.101905	-0.51672	-0.268527	-0.276199	-0.478883	-0.221094
962	-1.15145	-0.745259	-0.416711	-0.765288	-0.919372	NA	NA	NA	NA	NA	NA	NA	NA
963	-1.49447	-1.18859	-1.55098	-1.13892	-1.15165	-1.10261	-0.783404	-1.15795	-0.361263	NA	NA	NA	NA
965	0.870293	1.09576	0.371042	-0.060752	-0.0244955	0.544703	-0.306874	0.800559	0.172901	0.0801247	0.625339	0.774361	NA
966	1.30756	0.682396	0.500924	0.705779	0.540778	0.894468	1.24739	1.08138	1.12216	0.971344	0.996072	1.01751	1.13053
967	NA	NA	NA	NA	NA	NA	NA	NA	NA	NA	NA	NA	NA
968	-1.5895	-1.66917	-1.10199	-1.259	-1.45421	-0.65183	-0.817089	-1.06383	-0.63122	-0.643469	-0.939333	NA	NA
969	-1.61825	-1.26183	NA	NA	NA	NA	NA	NA	NA	NA	NA	NA	NA
970	NA	NA	NA	NA	NA	NA	NA	NA	NA	NA	NA	NA	NA
971	0.616106	0.679875	0.804685	0.670174	0.862643	0.731256	0.894106	0.777988	0.647493	0.669194	0.67992	0.755317	1.51469
972	NA	NA	NA	NA	NA	NA	NA	NA	NA	NA	NA	NA	NA
973	0.0951902	0.070161	-0.162452	0.157064	0.276497	0.819829	0.986688	0.525031	0.918043	0.623543	0.783713	0.752877	0.335144
974	0.341348	-1.67881	-1.19715	-1.19162	NA	NA	NA	NA	NA	NA	NA	NA	NA
975	1.32119	1.08975	0.91023	1.42727	1.28506	1.42708	1.64114	1.17882	1.46786	1.55324	1.21801	1.29653	1.42995
976	-0.527032	-0.549488	-0.061322	0.606175	-0.282667	-0.328764	-0.52488	-0.0012297	-0.120992	-0.522163	-0.355482	-0.505699	-0.629112
977	-0.666624	-0.941911	-0.794482	-0.807241	-0.72091	-0.720578	-0.659527	-0.866261	-0.55118	-0.539334	-0.804058	-0.530438	NA
978	-1.18509	NA	NA	NA	NA	NA	NA	NA	NA	NA	NA	NA	NA
983	-0.587726	0.0945021	-0.263143	-1.59269	-1.05283	-0.0516799	-0.0495463	-0.6076	-0.726071	0.854732	NA	NA	NA
984	NA	NA	NA	NA	NA	NA	NA	NA	NA	NA	NA	NA	NA
987	0.401854	0.489221	-0.049285	0.262593	0.571132	-0.848371	-0.533281	0.0246447	-0.21444	0.141574	-0.242685	-0.233983	-0.511574
988	-1.19625	NA	NA	NA	NA	NA	NA	NA	NA	NA	NA	NA	NA
989	-1.52392	-1.43329	-1.43463	-1.30315	-1.08695	-1.11714	-1.14513	-0.709156	-0.901849	NA	NA	NA	NA
990	-1.12507	-1.12674	-1.01381	-1.30416	-0.977521	-0.576294	-0.285905	-1.02677	-0.627385	-0.479874	-0.473211	-0.811946	NA
991	-1.33008	-0.788167	NA	NA	NA	NA	NA	NA	NA	NA	NA	NA	NA
993	NA	NA	NA	NA	NA	NA	NA	NA	NA	NA	NA	NA	NA
994	-0.0147045	0.629115	0.232307	0.73528	0.0722787	0.226758	-0.353275	-0.132684	-0.136254	0.368793	-0.256156	-0.0728987	NA
995	NA	NA	NA	NA	NA	NA	NA	NA	NA	NA	NA	NA	NA
996	0.89314	0.847647	0.590412	0.675979	1.01898	0.905539	0.843095	1.20897	0.760983	0.804181	1.12982	0.844459	1.41566
997	0.413915	0.170986	1.15977	0.395311	0.178544	0.976286	0.899028	0.34972	0.713371	0.724778	0.588304	0.810375	0.978654
998	-1.51459	-0.182262	-1.5607	-0.754509	-0.747691	NA	NA	NA	NA	NA	NA	NA	NA
999	NA	NA	NA	NA	NA	NA	NA	NA	NA	NA	NA	NA	NA
1000	-1.75456	-1.63258	NA	NA	NA	NA	NA	NA	NA	NA	NA	NA	NA
1001	-0.722863	-0.710222	-0.657238	-0.442469	-0.557769	-0.589417	-0.26507	0.0270726	-0.329743	-0.653989	-0.998509	-0.635184	-0.622446
1002	-1.60727	-1.41405	-1.04756	-1.42989	-0.762332	NA	NA	NA	NA	NA	NA	NA	NA
1003	-1.1467	-1.6902	-0.674841	-0.802832	-1.19024	-0.967229	-1.09905	-0.607637	NA	NA	NA	NA	NA
1004	-1.33756	-1.14362	-1.11466	-0.348792	-1.26354	NA	NA	NA	NA	NA	NA	NA	NA
1005	-1.58718	NA	NA	NA	NA	NA	NA	NA	NA	NA	NA	NA	NA
1006	NA	NA	NA	NA	NA	NA	NA	NA	NA	NA	NA	NA	NA
1007	-1.44709	NA	NA	NA	NA	NA	NA	NA	NA	NA	NA	NA	NA
1008	-0.350739	-1.16778	NA	NA	NA	NA	NA	NA	NA	NA	NA	NA	NA
1009	-0.337832	-0.443853	-0.438422	-0.901093	-0.784159	0.191731	-0.656735	-1.1188	-0.804421	-0.978726	-0.459808	-1.01188	NA
1010	-0.920607	NA	NA	NA	NA	NA	NA	NA	NA	NA	NA	NA	NA
1012	-1.15376	-1.43742	-1.10249	-0.729793	NA	NA	NA	NA	NA	NA	NA	NA	NA
1013	-1.08992	-1.03507	-1.32131	-1.15019	-1.0228	-0.899128	-0.531588	-1.08671	-0.809933	-1.11695	-0.397926	-1.11238	-0.776238
1014	NA	NA	NA	NA	NA	NA	NA	NA	NA	NA	NA	NA	NA
1015	-1.41073	-1.21793	-1.19051	-1.40471	-1.41449	-0.863013	-0.675276	-0.831381	-1.08893	NA	NA	NA	NA
1016	2.03334	2.04041	1.50619	0.909066	1.88752	0.797374	0.92246	1.66266	1.41417	1.72142	1.8413	1.95023	0.204441
1017	-1.1367	-1.24268	-0.988648	-0.815571	-1.3175	-1.20783	-0.271409	NA	NA	NA	NA	NA	NA
1018	-0.309692	-0.414234	0.0819755	-0.155213	-0.645916	-0.538311	-1.09103	-0.620544	-0.67987	-0.367193	-0.758347	-0.825508	-0.26011
1019	1.78989	1.95781	2.11568	1.84807	2.04854	2.46465	2.38876	2.28423	2.28675	2.25348	2.3686	2.41534	3.1124
1020	1.01929	0.918976	0.98058	0.933433	0.486058	1.56888	1.2046	1.33622	1.31345	0.852412	1.65803	1.45044	1.45897
1021	-1.32816	-1.18989	NA	NA	NA	NA	NA	NA	NA	NA	NA	NA	NA
1022	1.2111	0.687309	0.117347	0.254216	0.844329	1.83951	0.874928	0.94473	0.791035	0.68933	1.11884	1.1324	1.08441
1024	-1.23751	-1.14986	-0.658479	-0.858861	-1.29186	-1.07532	NA	NA	NA	NA	NA	NA	NA
1025	-0.0141238	0.050917	-0.0853322	0.0027121	0.143812	0.459462	0.672464	0.846952	0.706028	0.354321	1.0175	0.348518	NA
1026	1.82725	1.50416	1.55375	1.55259	1.16208	2.21311	1.56655	2.76391	1.53688	1.66972	2.48525	1.52092	1.78627
1027	-1.56657	-1.65541	-1.62286	-0.913784	-1.09165	-0.855399	-1.08394	-1.14251	-0.296999	-0.475024	-0.202008	-0.455996	NA
1028	-0.000447627	0.897605	1.86302	2.02629	1.72734	1.5554	3.18659	1.35193	2.42168	1.42906	2.27487	1.50917	2.02794
1029	-1.36969	-1.25908	-1.28222	-0.574555	-0.66046	-0.77193	-0.630504	-0.666781	-0.50117	NA	NA	NA	NA
1030	0.596408	0.237129	0.0556489	0.609359	0.0075828	0.136293	0.231253	0.18534	0.19966	0.464393	-0.0258859	0.275903	0.234469
1031	-1.01262	-0.67279	-0.971952	-1.47543	-1.14585	-0.409804	-1.01998	-1.16603	-0.7085	-0.714169	-0.81355	-0.63439	-0.17865
1032	-0.221966	-0.139948	-0.584568	-1.01701	-1.0435	0.113511	-0.427261	-0.640687	-0.366683	-1.05682	-0.674802	-0.222329	NA
1033	NA	NA	NA	NA	NA	NA	NA	NA	NA	NA	NA	NA	NA
1036	-0.0380376	1.27338	-1.54733	0.667295	-0.641677	0.457964	-0.398834	0.763234	0.88706	0.603438	1.40485	1.2665	1.5219
1038	NA	NA	NA	NA	NA	NA	NA	NA	NA	NA	NA	NA	NA
1039	NA	NA	NA	NA	NA	NA	NA	NA	NA	NA	NA	NA	NA
1040	0.159635	0.149571	0.135717	1.08795	0.533115	0.922636	0.958163	1.37336	0.764537	-0.21161	0.133129	0.580395	NA
1041	-1.50922	-1.02932	-1.0707	-0.890016	NA	NA	NA	NA	NA	NA	NA	NA	NA
1043	NA	NA	NA	NA	NA	NA	NA	NA	NA	NA	NA	NA	NA
1044	NA	NA	NA	NA	NA	NA	NA	NA	NA	NA	NA	NA	NA
1045	-1.26489	-1.09836	NA	NA	NA	NA	NA	NA	NA	NA	NA	NA	NA
1046	NA	NA	NA	NA	NA	NA	NA	NA	NA	NA	NA	NA	NA
1047	-1.3252	-1.42057	-1.39324	-1.06895	-0.374074	-1.37355	-0.809888	NA	NA	NA	NA	NA	NA
1048	0.559716	-0.427201	0.181902	0.455776	0.551315	NA	NA	NA	NA	NA	NA	NA	NA
1050	-1.5929	-1.56657	-1.12148	-1.16342	-1.05635	-0.161884	NA	NA	NA	NA	NA	NA	NA
1051	-0.779858	-0.874357	-1.04291	-0.932058	-0.680029	0.761301	-1.05652	-1.24406	-0.52039	-0.776106	-0.723237	0.777519	NA
1052	-0.0504917	1.1827	-0.124342	0.481026	-0.742748	1.1335	0.539363	1.96269	1.39284	0.754102	0.94137	-0.117199	0.537189
1053	NA	NA	NA	NA	NA	NA	NA	NA	NA	NA	NA	NA	NA
1054	-0.701483	-0.626148	-0.738297	-0.509457	-0.550592	0.42005	-0.326999	-0.197067	-0.227528	-0.230286	-0.201131	-0.00436463	-0.456963
1056	-0.939385	-1.53037	-0.168765	-1.26818	-0.30645	-1.51723	NA	NA	NA	NA	NA	NA	NA
1057	-1.04491	NA	NA	NA	NA	NA	NA	NA	NA	NA	NA	NA	NA
1058	-1.49533	-1.08942	-0.888672	NA	NA	NA	NA	NA	NA	NA	NA	NA	NA
1059	-0.817043	-0.926496	-0.334845	-0.278204	-0.419135	-0.606499	-0.304991	-0.388688	-0.757267	-0.544569	-0.41698	NA	NA
1060	-0.396404	0.094743	-0.211825	0.244769	0.0935379	0.479994	0.226415	0.659081	0.479562	0.239722	0.231891	0.344572	NA
1062	-0.877595	-0.0780055	-0.853338	-1.27495	-0.46868	-0.476298	-0.440996	NA	NA	NA	NA	NA	NA
1063	-1.57238	-0.306211	-0.954697	NA	NA	NA	NA	NA	NA	NA	NA	NA	NA
1066	-0.842436	-0.704658	1.14792	-0.0412999	0.324385	-0.268527	NA	NA	NA	NA	NA	NA	NA
1068	NA	NA	NA	NA	NA	NA	NA	NA	NA	NA	NA	NA	NA
1069	1.57733	1.96116	0.943492	1.50069	1.77312	2.03586	2.10931	2.5302	1.80988	1.65793	1.75869	1.86187	2.03498
1070	0.482001	0.429555	0.204838	-0.0852486	0.568825	0.553006	0.695044	0.826208	-0.226992	0.618425	0.519141	0.414719	0.0611957
1071	-1.60404	-1.5929	-1.56585	-0.851472	-1.3123	NA	NA	NA	NA	NA	NA	NA	NA
1072	2.29747	2.45	2.69294	2.70247	2.58574	2.74123	2.83362	2.93392	2.57291	2.89755	2.71514	2.33058	2.55917
1073	0.374865	0.698161	0.00892389	-0.188548	0.155857	-0.302742	0.494398	0.50704	0.236937	0.13997	0.138182	-0.115211	1.29904
1075	-0.705638	-0.163907	0.0932105	0.179157	-0.0822238	0.284816	0.628023	1.04679	0.391335	0.873809	0.0820453	0.259848	-0.357807
1080	NA	NA	NA	NA	NA	NA	NA	NA	NA	NA	NA	NA	NA
1081	2.38876	-0.431139	0.345465	2.26184	1.45314	4.54702	3.05707	-0.404067	0.437254	NA	NA	NA	NA
1082	NA	NA	NA	NA	NA	NA	NA	NA	NA	NA	NA	NA	NA
1084	NA	NA	NA	NA	NA	NA	NA	NA	NA	NA	NA	NA	NA
1087	-1.38156	-1.3996	-1.50476	-1.32178	-1.24027	-1.18331	-1.2378	-1.20147	-1.07788	NA	NA	NA	NA
1088	NA	NA	NA	NA	NA	NA	NA	NA	NA	NA	NA	NA	NA
1089	NA	NA	NA	NA	NA	NA	NA	NA	NA	NA	NA	NA	NA
1101	-1.21297	-0.284219	NA	NA	NA	NA	NA	NA	NA	NA	NA	NA	NA
1102	-0.447368	-0.390255	0.509418	0.511439	0.251954	0.291211	0.837996	0.496363	-0.961991	0.0590167	0.065556	0.35259	NA
1103	-1.58338	NA	NA	NA	NA	NA	NA	NA	NA	NA	NA	NA	NA
1104	-1.29981	-1.37531	-1.64106	-0.493281	-1.00548	-0.736944	NA	NA	NA	NA	NA	NA	NA
1105	0.540672	0.628235	0.100164	0.381983	0.711287	2.08693	-0.0596335	0.425989	0.0536188	0.0568147	0.377417	0.426061	0.378506
1106	-1.57687	-1.48779	-0.608041	-1.05165	-0.780699	-0.884354	-0.977904	NA	NA	NA	NA	NA	NA
1107	NA	NA	NA	NA	NA	NA	NA	NA	NA	NA	NA	NA	NA
1108	1.67124	1.4068	2.1759	1.73443	1.85078	1.52427	1.55013	1.41773	1.54302	1.54152	1.69375	1.52568	2.07391
1109	0.892645	0.862237	1.02553	1.03683	1.02192	1.10226	1.54715	1.2102	1.26884	1.0931	0.988001	1.11567	0.903184
1111	-0.730548	-1.2782	-1.56637	-1.43724	-0.930391	-0.694559	-0.479714	-0.363376	-0.959571	-0.482309	NA	NA	NA
1112	0.142637	0.0625683	0.511505	0.420341	0.451385	0.077131	0.480833	0.168717	0.441192	0.0661418	0.325901	0.335383	0.421853
1113	1.76467	1.56548	0.565022	1.67036	1.39497	3.457	2.41917	2.70113	2.78973	2.41107	1.96607	1.55963	1.79233
1114	0.242586	0.54557	-1.24772	0.206121	0.394614	-0.258068	-0.457026	0.17631	0.907322	1.43267	0.639769	1.32456	0.863251
1116	-1.31537	-1.21312	-1.21241	0.146127	-1.08578	-0.9464	0.571399	1.38953	-1.01165	-0.926496	-0.623566	NA	NA
1117	-0.803059	0.230228	-0.183934	-0.709976	NA	NA	NA	NA	NA	NA	NA	NA	NA
1118	-1.35287	-1.19833	-0.711495	-0.905692	-0.826066	-0.472386	-0.455404	-0.510085	-0.808016	-0.43284	-0.439739	-0.563669	NA
1119	-1.04156	-0.585356	-0.33646	0.286733	-0.85109	-0.91266	-0.868157	-0.56437	-1.20461	-1.06101	-0.422798	-0.437168	NA
1120	0.972832	1.47728	1.15254	1.45449	1.24853	0.639377	1.5162	2.18953	1.64904	1.85504	1.14554	1.50303	0.99765
1121	-1.23491	-0.706536	-1.5264	-1.01074	-1.05088	NA	NA	NA	NA	NA	NA	NA	NA
1122	NA	NA	NA	NA	NA	NA	NA	NA	NA	NA	NA	NA	NA
1123	-0.0528696	0.0994794	-0.575194	-0.0873614	-0.363969	-0.253647	-0.626747	-0.785493	-0.0699139	-0.151255	-0.38779	-0.574697	-0.0632788
1124	-0.13286	-1.43616	-0.982187	-0.952563	1.10603	NA	NA	NA	NA	NA	NA	NA	NA
1128	-0.402829	-0.476584	0.110438	-0.11995	0.283385	-0.063932	0.30742	-0.0684148	0.535876	0.119041	-0.00729889	0.0867081	-0.792506
1129	NA	NA	NA	NA	NA	NA	NA	NA	NA	NA	NA	NA	NA
1130	-0.736353	-0.246059	-1.34128	-0.569642	-0.293042	-0.827648	-0.202103	-0.448357	-0.687526	-0.689851	-0.697265	-0.567178	NA
1131	-0.548247	-0.998341	-0.0113608	-1.0766	-0.329308	-0.401182	-0.884998	NA	NA	NA	NA	NA	NA
1132	-1.38207	-0.677372	-0.921431	NA	NA	NA	NA	NA	NA	NA	NA	NA	NA
1133	NA	NA	NA	NA	NA	NA	NA	NA	NA	NA	NA	NA	NA
1134	-0.295006	-0.320889	-0.242833	-0.105486	-0.0329485	0.0915546	0.151369	-0.0594709	-0.0774666	-0.0952696	-0.0158282	-0.0961995	-0.158056
1135	-0.800161	-1.40532	NA	NA	NA	NA	NA	NA	NA	NA	NA	NA	NA
1136	-0.470895	-0.541554	-0.173533	-0.414801	-0.303007	0.402817	0.292616	-0.304091	-0.0607113	-0.282977	0.0270726	-0.165683	0.192226
1137	-1.72024	-1.11842	-0.805512	NA	NA	NA	NA	NA	NA	NA	NA	NA	NA
1138	-1.40307	-0.734246	0.787524	NA	NA	NA	NA	NA	NA	NA	NA	NA	NA
1139	NA	NA	NA	NA	NA	NA	NA	NA	NA	NA	NA	NA	NA
1140	-1.17365	NA	NA	NA	NA	NA	NA	NA	NA	NA	NA	NA	NA
1141	-1.66559	-1.62638	-1.42704	NA	NA	NA	NA	NA	NA	NA	NA	NA	NA
1142	-1.60879	NA	NA	NA	NA	NA	NA	NA	NA	NA	NA	NA	NA
1143	-1.36436	-1.79377	-0.388601	NA	NA	NA	NA	NA	NA	NA	NA	NA	NA
1144	-0.305548	-0.424937	-0.182054	-0.197138	-0.0831406	-0.0300697	0.280813	0.0893595	0.0940545	0.0076773	0.18732	0.0396834	-0.93378
1145	-0.418986	-1.67102	-1.81503	-1.35517	-1.03013	-0.685846	-0.872351	-1.12687	NA	NA	NA	NA	NA
1146	-1.20552	-1.31853	-0.973859	-0.555509	-0.732689	-0.954964	-0.460121	-0.565246	-1.01143	-0.990645	-0.640991	NA	NA
1147	-0.08337	0.576915	-0.128799	0.000657598	0.112026	-0.0855203	0.0989486	0.447737	0.18858	0.354009	-0.0240651	-0.112582	0.906714
1149	NA	NA	NA	NA	NA	NA	NA	NA	NA	NA	NA	NA	NA
1152	-1.18187	-1.24589	-1.49562	-0.727115	NA	NA	NA	NA	NA	NA	NA	NA	NA
1153	NA	NA	NA	NA	NA	NA	NA	NA	NA	NA	NA	NA	NA
1154	-1.06053	-1.36062	-1.37497	-1.07107	-0.772852	-0.668623	-0.710591	-0.27238	-0.87372	-0.820641	-0.798309	-0.672199	-0.793987
1155	1.32147	1.51022	0.520424	1.34745	0.902983	1.98414	1.81744	2.02888	1.53439	2.03855	1.4755	1.65946	2.39035
1158	NA	NA	NA	NA	NA	NA	NA	NA	NA	NA	NA	NA	NA
1160	-1.02504	-1.05742	-0.63985	-1.30502	NA	NA	NA	NA	NA	NA	NA	NA	NA
1161	NA	NA	NA	NA	NA	NA	NA	NA	NA	NA	NA	NA	NA
1163	-1.1288	-1.16409	-0.921019	-1.30611	-1.42145	-0.368809	-0.890465	-0.442346	-0.642821	-1.01103	NA	NA	NA
1164	0.812795	0.737981	1.74605	0.679738	0.603408	2.04043	0.229946	1.11093	0.288591	0.687027	0.832381	0.461804	2.77311
1173	NA	NA	NA	NA	NA	NA	NA	NA	NA	NA	NA	NA	NA
1174	1.05534	0.267275	0.486103	0.0530071	0.574612	1.74773	1.21241	0.726684	1.72176	1.29036	1.87467	1.96121	1.51567
1175	2.14707	2.19651	1.77918	2.33089	2.04343	2.94752	2.82143	2.80451	2.85208	2.68575	2.80453	2.75868	3.22153
1176	NA	NA	NA	NA	NA	NA	NA	NA	NA	NA	NA	NA	NA
1178	NA	NA	NA	NA	NA	NA	NA	NA	NA	NA	NA	NA	NA
1179	NA	NA	NA	NA	NA	NA	NA	NA	NA	NA	NA	NA	NA
1180	0.595366	-0.170779	1.64544	1.34644	2.40879	1.62621	3.31513	1.78139	2.84282	2.74689	2.96506	2.46507	1.38679
1181	-1.04845	-1.29525	-1.15994	-1.2687	-1.07953	-1.20699	-1.27118	NA	NA	NA	NA	NA	NA
1182	0.499902	0.539598	0.0292356	0.497711	0.601269	-0.34932	-0.342509	0.776819	-0.29218	0.422336	0.0566175	-0.464107	NA
1183	-0.618498	-0.275583	-1.43535	-0.930027	-0.782871	-0.642706	-0.874602	-0.480834	-0.72145	-0.539539	-0.730506	0.349002	NA
1184	-1.34641	-0.965606	-1.37086	NA	NA	NA	NA	NA	NA	NA	NA	NA	NA
1185	-0.14048	0.0363543	-0.460717	-0.161408	-0.375588	-1.06281	-0.722821	-0.992758	-0.640801	-0.829326	-0.666585	NA	NA
1186	NA	NA	NA	NA	NA	NA	NA	NA	NA	NA	NA	NA	NA
1187	NA	NA	NA	NA	NA	NA	NA	NA	NA	NA	NA	NA	NA
1188	NA	NA	NA	NA	NA	NA	NA	NA	NA	NA	NA	NA	NA
1191	-1.0914	-0.831802	-1.22028	NA	NA	NA	NA	NA	NA	NA	NA	NA	NA
1192	-0.318386	-0.0882834	-0.361066	-0.298445	-0.197539	0.205022	0.609596	0.397472	0.157	0.0298816	0.465961	0.245573	0.294185
1193	-1.61804	-1.58453	-1.27389	-1.35979	-1.46425	-1.37145	-0.978671	NA	NA	NA	NA	NA	NA
1195	0.711331	1.43492	0.911171	1.17635	1.26628	0.797067	0.617056	1.01675	1.27607	0.749625	0.395497	0.520392	0.76693
1196	0.670119	0.799514	0.9253	0.298309	0.447608	0.389835	0.0644901	0.843885	0.301453	0.551105	0.185091	0.20731	-0.321617
1197	NA	NA	NA	NA	NA	NA	NA	NA	NA	NA	NA	NA	NA
1198	0.427984	0.849751	0.987522	0.968783	0.948132	1.22667	1.20251	1.19545	1.00174	0.763493	1.06269	1.04714	2.04069
1200	0.559841	0.924	-0.574591	0.175617	0.0892037	-0.739821	0.0927106	0.0223036	0.27426	0.379911	0.0947258	0.875898	NA
1201	-0.133476	-0.0598774	0.179722	0.0300846	-0.406665	0.583394	0.0507546	0.211065	0.414195	0.229321	-0.231533	-0.103971	1.19577
1203	0.0719613	0.338813	-0.431473	-0.0656489	0.0867081	0.141852	0.259805	0.790264	0.069949	-0.640763	0.249628	0.185294	-0.110411
1207	-0.405778	-0.562339	0.187289	0.203095	-0.224731	-0.806194	-0.840782	-0.451052	-0.808153	-0.26246	0.244695	-0.0333237	NA
1208	NA	NA	NA	NA	NA	NA	NA	NA	NA	NA	NA	NA	NA
1209	1.04592	0.786163	0.502243	0.74148	0.60444	0.146241	0.416605	-0.0848517	0.199737	0.0346853	0.186806	0.805899	NA
1211	0.259171	0.0884765	-0.00440293	0.0393729	-0.0167398	0.346147	0.550685	0.0494908	0.0885112	0.337331	0.19049	0.362036	0.987863
1212	0.92687	0.288354	-0.59158	-0.39901	0.383924	1.0413	0.463804	0.61437	0.458452	0.239604	0.375525	0.454681	1.58731
1213	2.58586	2.3191	2.00808	1.96527	2.36491	2.42793	2.40823	2.51134	2.19816	2.39618	2.47926	2.21694	2.47971
1215	-0.566827	-0.611649	-0.689289	-0.379312	-0.174108	-0.471149	-0.601378	-0.45503	-0.651752	-0.495881	-0.366796	NA	NA
1230	-1.30932	-1.65291	-1.22013	-1.09575	NA	NA	NA	NA	NA	NA	NA	NA	NA
1232	NA	NA	NA	NA	NA	NA	NA	NA	NA	NA	NA	NA	NA
1233	NA	NA	NA	NA	NA	NA	NA	NA	NA	NA	NA	NA	NA
1234	NA	NA	NA	NA	NA	NA	NA	NA	NA	NA	NA	NA	NA
1235	-1.15961	-0.271281	NA	NA	NA	NA	NA	NA	NA	NA	NA	NA	NA
1236	0.564784	0.679115	0.846807	0.65233	0.864181	0.563748	0.686128	0.578162	0.535416	0.371451	0.744206	0.623727	0.239839
1237	-1.81125	-1.51811	-1.31112	-1.13865	-1.30307	-0.831101	NA	NA	NA	NA	NA	NA	NA
1238	NA	NA	NA	NA	NA	NA	NA	NA	NA	NA	NA	NA	NA
1240	NA	NA	NA	NA	NA	NA	NA	NA	NA	NA	NA	NA	NA
1241	-1.05587	-1.23991	-1.01398	-1.37514	-1.2212	-1.38232	-1.49801	-1.21807	NA	NA	NA	NA	NA
1244	NA	NA	NA	NA	NA	NA	NA	NA	NA	NA	NA	NA	NA
1258	-0.764461	-0.985771	-1.17846	-0.751372	-0.778532	-0.734625	-0.388398	-0.905692	-0.575477	-0.613384	-0.638254	-0.39104	-0.744279
1259	-1.40584	-0.508038	NA	NA	NA	NA	NA	NA	NA	NA	NA	NA	NA
1260	NA	NA	NA	NA	NA	NA	NA	NA	NA	NA	NA	NA	NA
1261	0.191126	1.21843	0.0854403	0.442233	0.729064	-0.822863	-0.554711	0.25656	0.305271	0.0904491	0.0925037	NA	NA
1262	-1.33184	-1.09122	-1.62848	-1.16355	-1.19813	-1.03594	-1.42411	-1.16248	NA	NA	NA	NA	NA
1263	-0.779903	-0.325942	-0.685326	-0.777826	-0.573387	-0.554989	-0.765114	-0.783404	-0.598136	-0.550696	-0.63814	-0.477637	NA
1264	NA	NA	NA	NA	NA	NA	NA	NA	NA	NA	NA	NA	NA
1265	-0.340553	-0.34003	-0.0249849	-0.388891	-0.0280246	0.741753	0.301067	0.339421	0.509165	0.129739	0.364071	0.00658043	0.727866
1266	0.738634	0.317931	0.961362	1.1451	-0.294482	1.86527	1.62729	0.733071	2.13965	0.62329	1.01672	0.92551	2.56322
1267	-0.567811	-0.233836	-0.626522	-0.646529	-0.282899	-0.673697	-0.390778	-0.398863	-0.173602	-0.422257	-0.347738	-0.587977	-0.282382
1268	-0.160501	-0.0502905	0.0722258	-1.00407	-1.0707	NA	NA	NA	NA	NA	NA	NA	NA
1269	NA	NA	NA	NA	NA	NA	NA	NA	NA	NA	NA	NA	NA
1270	-1.41493	-1.4102	-1.02211	-1.22056	-1.05058	-1.17751	NA	NA	NA	NA	NA	NA	NA
1271	1.36476	1.37946	1.72705	1.54049	1.61711	1.66091	1.9726	1.57754	1.62705	1.38284	1.51704	1.66563	1.2701
1272	0.483619	0.570185	0.226893	0.896621	1.06587	0.326865	0.826833	0.802091	0.491757	1.13467	0.451561	0.606334	0.758381
1277	-1.61814	1.74886	-0.198034	0.514571	1.74944	-0.762115	0.740092	-0.228333	NA	NA	NA	NA	NA
1278	0.537946	-0.711248	2.0302	1.25669	1.06132	1.37961	-0.16168	0.526737	-0.58446	0.838536	0.434671	1.64485	0.598937
1280	-1.07034	-0.864272	-1.56286	-1.3546	NA	NA	NA	NA	NA	NA	NA	NA	NA
1281	-0.663459	-1.65632	-0.871667	NA	NA	NA	NA	NA	NA	NA	NA	NA	NA
1282	-1.58823	-1.50971	-1.08628	-1.37078	NA	NA	NA	NA	NA	NA	NA	NA	NA
1284	-0.327569	-1.1067	1.24871	0.0110732	-1.29764	0.380265	-0.373618	0.188113	-1.20622	-0.860452	-0.436191	-0.963285	1.07136
1285	-1.3312	-0.13769	-0.448481	-0.0952274	0.126985	1.42847	-0.735088	0.541532	-0.0347473	-0.620544	-0.238656	0.643287	NA
1286	1.27307	1.54087	1.69613	1.60354	1.68042	1.53547	1.81915	1.62198	1.46069	1.22568	1.79589	1.73628	1.15288
1287	-0.558918	-0.461532	-0.586289	-0.919115	NA	NA	NA	NA	NA	NA	NA	NA	NA
1288	-0.110668	-0.860066	0.0382581	-0.180755	NA	NA	NA	NA	NA	NA	NA	NA	NA
1289	-0.645801	-0.741517	NA	NA	NA	NA	NA	NA	NA	NA	NA	NA	NA
1290	-0.00885609	-0.6591	-0.628023	-1.21637	NA	NA	NA	NA	NA	NA	NA	NA	NA
1291	NA	NA	NA	NA	NA	NA	NA	NA	NA	NA	NA	NA	NA
1292	-0.839932	-1.53335	0.309797	-0.505666	-1.42873	0.551336	-0.585679	-0.100544	-0.931901	-0.882079	-0.906858	-1.04121	0.623387
1293	NA	NA	NA	NA	NA	NA	NA	NA	NA	NA	NA	NA	NA
1294	-0.0147626	0.587375	-1.67671	-0.990256	-1.28253	0.763594	-0.685286	-1.27088	-0.695325	NA	NA	NA	NA
1295	-0.533857	-1.51107	-0.242586	-0.263675	-0.647103	-0.419405	-1.00171	-0.490687	-0.618498	-0.466564	-0.882969	-0.596575	NA
1296	NA	NA	NA	NA	NA	NA	NA	NA	NA	NA	NA	NA	NA
1297	-1.63481	NA	NA	NA	NA	NA	NA	NA	NA	NA	NA	NA	NA
1298	-1.06227	0.914308	0.0313935	0.27044	1.60951	-0.220876	1.17415	0.87193	-0.650136	1.88247	NA	NA	NA
1299	-1.34161	-0.860404	1.162	-0.567354	0.531345	-1.03746	-0.432445	-0.185121	2.50481	NA	NA	NA	NA
1300	NA	NA	NA	NA	NA	NA	NA	NA	NA	NA	NA	NA	NA
1301	-1.35238	-1.10443	NA	NA	NA	NA	NA	NA	NA	NA	NA	NA	NA
1302	-0.756448	-0.845993	-0.888573	-0.55676	-0.743896	-1.04479	-0.699493	-0.331513	-0.763939	-1.20938	NA	NA	NA
1303	1.36232	0.652387	1.32224	0.507899	-0.885395	1.04606	0.151838	-0.155686	0.626251	NA	NA	NA	NA
1305	-1.3574	-1.30619	-1.38478	-0.724861	-1.30043	-0.8684	-1.20783	NA	NA	NA	NA	NA	NA
1306	-0.819764	-0.878579	-0.224172	-0.583744	-0.861611	0.0781825	-0.804966	-0.352159	-0.491367	-0.982132	-0.453816	-0.679672	-0.174154
1307	NA	NA	NA	NA	NA	NA	NA	NA	NA	NA	NA	NA	NA
1308	NA	NA	NA	NA	NA	NA	NA	NA	NA	NA	NA	NA	NA
1310	NA	NA	NA	NA	NA	NA	NA	NA	NA	NA	NA	NA	NA
1311	-0.680983	-1.13514	0.554065	NA	NA	NA	NA	NA	NA	NA	NA	NA	NA
1312	-1.39461	NA	NA	NA	NA	NA	NA	NA	NA	NA	NA	NA	NA
1314	NA	NA	NA	NA	NA	NA	NA	NA	NA	NA	NA	NA	NA
1315	1.39359	1.46259	0.501401	1.02549	1.59638	0.902026	1.42366	1.04329	1.8141	1.61391	1.88729	1.51564	1.39055
1316	0.770852	1.07429	0.688605	0.718351	-0.310171	1.34414	0.891853	0.713777	1.04864	1.15967	0.213551	0.536186	1.11906
1317	0.645577	0.232455	0.522476	-0.137447	0.785584	0.652641	0.819663	0.389885	1.29107	0.689973	1.45436	1.32999	0.629704
1318	-0.306503	-0.174016	-0.0329287	-0.319865	-0.111893	0.310928	0.555813	0.0447272	0.162949	-0.170664	0.0877141	0.226042	-0.200871
1325	-0.445455	-0.145729	-0.904224	-0.809842	-0.64718	-0.186751	-0.717719	-0.933049	-0.797452	-0.21834	-0.589237	-0.578604	NA
1326	-0.694438	-1.19938	-1.30682	NA	NA	NA	NA	NA	NA	NA	NA	NA	NA
1327	2.58635	2.46345	1.79201	2.07638	2.24975	3.32843	2.88978	2.71895	2.75812	2.91326	2.99334	2.8113	3.80599
1329	2.0935	2.03296	1.95337	1.95489	2.26434	3.3649	2.69501	2.77352	2.64412	2.59348	2.63902	2.43909	3.4217
1337	2.83786	2.52849	2.55374	2.47484	2.93643	3.65967	2.97462	3.33424	3.02315	3.27935	3.27443	3.07999	3.85921
1339	0.132055	-0.187474	0.241926	-1.26399	1.85919	1.75995	1.8321	-0.823373	1.55002	1.48151	2.04637	0.973146	NA
1340	1.46924	1.49952	1.18327	1.62464	1.41726	2.63293	2.55422	2.41535	2.31873	2.06653	2.14581	2.13746	2.64724
1345	-0.319865	0.0300477	-0.121209	-0.419945	0.328899	0.603169	0.20522	0.0175473	-0.29388	-0.468458	0.518869	NA	NA
1346	-0.621737	-1.36652	-1.10318	-0.28466	0.555781	-0.0675944	0.923157	-0.384782	0.264686	-0.34331	0.0980576	-0.749958	NA
1347	-0.321644	0.0340977	0.0807537	-0.247477	-0.0975537	-0.202458	-0.0637483	0.282922	0.106318	-0.245637	0.124589	-0.286346	-0.182054
1349	1.89173	2.60464	2.13999	1.95239	2.15348	2.96921	2.58822	2.79822	2.32107	2.14994	2.33477	2.22893	3.14796
1350	3.49743	3.22717	2.90207	2.98595	3.50766	4.04311	3.77862	3.71622	3.52634	3.45861	3.91032	3.60996	3.91439
1351	1.84818	1.99599	1.98558	1.66699	2.04604	2.88231	2.75281	2.92545	2.54036	2.79107	2.88472	2.4295	2.73708
1352	-1.25036	-1.3256	-1.40203	-1.27752	-1.43949	-1.06425	-1.06059	-1.13229	NA	NA	NA	NA	NA
1353	0.249104	0.344861	-0.151233	-0.0676764	0.196907	0.956462	1.05318	1.59259	0.387079	0.726258	1.02068	0.558392	0.85617
1355	0.0424181	0.247063	0.0351442	-0.110948	0.107659	-0.758088	-0.209935	0.099719	-0.237498	-0.016507	0.106556	-0.516454	0.69399
1356	-1.17983	0.877636	-0.316721	-0.554919	-0.633181	NA	NA	NA	NA	NA	NA	NA	NA
1357	NA	NA	NA	NA	NA	NA	NA	NA	NA	NA	NA	NA	NA
1358	-0.439739	NA	NA	NA	NA	NA	NA	NA	NA	NA	NA	NA	NA
1359	-1.3722	0.0593564	-0.263878	-0.749444	-1.03828	NA	NA	NA	NA	NA	NA	NA	NA
1360	NA	NA	NA	NA	NA	NA	NA	NA	NA	NA	NA	NA	NA
1361	NA	NA	NA	NA	NA	NA	NA	NA	NA	NA	NA	NA	NA
1362	-0.865145	-1.64826	-1.55823	-1.05664	-0.90554	NA	NA	NA	NA	NA	NA	NA	NA
1363	1.18405	0.964111	1.33056	1.35185	1.50351	1.2992	1.58817	1.6602	1.01811	1.29175	1.09473	1.06763	0.108117
1364	-0.866406	0.010753	0.108032	-0.107367	-0.0427557	0.0756218	-0.722364	NA	NA	NA	NA	NA	NA
1365	-0.951071	-0.207571	0.119108	0.00982945	0.292796	0.211505	-0.296658	0.640332	0.356385	0.0055012	NA	NA	NA
1366	-0.636358	-1.09799	-1.23788	-0.887827	0.448113	NA	NA	NA	NA	NA	NA	NA	NA
1368	0.469136	0.294517	-0.373475	-0.857273	-0.0938977	0.0392816	-0.161839	0.24285	-0.640306	0.286328	-0.198814	NA	NA
1369	NA	NA	NA	NA	NA	NA	NA	NA	NA	NA	NA	NA	NA
1370	-1.61106	-1.19729	-1.31175	NA	NA	NA	NA	NA	NA	NA	NA	NA	NA
1371	-0.373589	-0.223978	-0.123275	-0.365693	-0.233198	-0.538925	-0.516221	-0.372734	-0.655883	-0.534909	-0.441026	-0.934563	-0.0107629
1373	-1.00458	-0.850135	-1.44937	-1.22972	0.230421	NA	NA	NA	NA	NA	NA	NA	NA
1374	-0.845518	NA	NA	NA	NA	NA	NA	NA	NA	NA	NA	NA	NA
1375	0.790524	0.769416	-0.272764	-0.0505723	-0.25272	0.353683	-0.272483	0.169685	-0.126786	0.421539	-0.513894	-0.155866	0.0363543
1376	0.107591	0.241852	-0.374703	-0.393835	0.422445	0.595526	0.444547	0.094743	0.523397	0.33745	0.687944	0.478017	0.175301
1378	NA	NA	NA	NA	NA	NA	NA	NA	NA	NA	NA	NA	NA
1379	NA	NA	NA	NA	NA	NA	NA	NA	NA	NA	NA	NA	NA
1380	NA	NA	NA	NA	NA	NA	NA	NA	NA	NA	NA	NA	NA
1381	NA	NA	NA	NA	NA	NA	NA	NA	NA	NA	NA	NA	NA
1382	-0.740499	-0.597737	-0.54111	-0.8478	0.637081	0.956869	0.890222	-0.151188	-0.898223	1.12047	NA	NA	NA
1384	NA	NA	NA	NA	NA	NA	NA	NA	NA	NA	NA	NA	NA
1385	-1.02839	-0.987872	-0.798851	-1.10462	-0.686125	-1.28994	-1.04039	-1.06823	-1.06666	NA	NA	NA	NA
1386	0.780084	0.748896	0.775525	0.79639	1.04527	0.576762	1.09553	0.843026	0.788265	0.943155	0.714605	0.629994	0.958075
1387	-0.935139	-0.640725	-1.33869	-1.02903	-0.812221	-0.859439	-0.675473	-0.594001	-0.723112	-0.436313	-0.595849	-0.871471	NA
1388	-1.55885	-1.16993	-1.19597	-1.46046	-1.00328	-1.08634	-0.743981	-0.884008	-0.789507	-0.689811	-0.884255	NA	NA
1389	1.11334	1.42131	-0.254123	1.13178	1.50983	0.825599	1.30601	1.10342	1.21227	1.45674	1.24839	1.30389	1.09243
1390	0.197138	-0.14651	-0.598173	-0.477765	0.145345	0.412524	0.314246	0.120482	0.116104	0.421381	0.928543	0.378722	0.71111
1392	NA	NA	NA	NA	NA	NA	NA	NA	NA	NA	NA	NA	NA
1393	NA	NA	NA	NA	NA	NA	NA	NA	NA	NA	NA	NA	NA
1394	-0.884107	NA	NA	NA	NA	NA	NA	NA	NA	NA	NA	NA	NA
1395	0.0338773	0.11405	0.362616	0.129358	0.284269	0.443154	0.553069	0.525106	0.138379	0.0977489	0.184747	0.287195	0.265331
1396	-1.2696	-1.21432	-1.19445	-1.39315	-1.22427	-0.996607	-1.29525	-1.08296	-1.1446	NA	NA	NA	NA
1397	1.12658	1.74409	0.781126	1.58121	1.4963	1.22378	1.40211	1.24977	1.38504	1.20387	1.13303	1.21831	1.13158
1398	-0.61913	-0.61283	-0.665607	-0.674368	-0.693792	-0.590029	-1.26354	-0.398453	-0.453692	-0.578106	-0.933362	0.151644	NA
1399	NA	NA	NA	NA	NA	NA	NA	NA	NA	NA	NA	NA	NA
1400	-0.88485	-0.999742	-1.05617	-0.771492	-0.713139	-0.296133	-0.39104	-0.7076	-0.583243	-0.505567	-0.583243	-0.286813	-0.11982
1401	NA	NA	NA	NA	NA	NA	NA	NA	NA	NA	NA	NA	NA
1404	-1.57447	-0.770397	NA	NA	NA	NA	NA	NA	NA	NA	NA	NA	NA
1406	NA	NA	NA	NA	NA	NA	NA	NA	NA	NA	NA	NA	NA
1407	-0.71207	-0.100608	-0.344387	-0.50271	-0.290874	-0.0506326	-0.219329	-0.704047	-0.293932	-0.285593	-0.0727544	-0.0779226	0.951706
1408	-1.09699	-0.879662	-1.59942	-0.850087	-0.820965	-1.07283	-0.455996	-0.479426	-0.60032	-0.711043	-0.772413	-0.515157	NA
1409	NA	NA	NA	NA	NA	NA	NA	NA	NA	NA	NA	NA	NA
1410	NA	NA	NA	NA	NA	NA	NA	NA	NA	NA	NA	NA	NA
1411	NA	NA	NA	NA	NA	NA	NA	NA	NA	NA	NA	NA	NA
1412	NA	NA	NA	NA	NA	NA	NA	NA	NA	NA	NA	NA	NA
1413	0.333789	0.411083	0.488659	0.511175	0.943258	0.65673	1.44873	0.810303	1.14494	0.803229	1.19219	1.01284	0.197954
1414	-0.631107	-1.03036	-1.18468	-0.822724	-1.17378	-0.653835	-0.260766	-0.0815159	-0.371111	-0.152625	-0.767337	-0.607086	NA
1415	NA	NA	NA	NA	NA	NA	NA	NA	NA	NA	NA	NA	NA
1416	NA	NA	NA	NA	NA	NA	NA	NA	NA	NA	NA	NA	NA
1417	-1.57478	-1.02718	-1.15741	-0.980263	-1.09587	-1.04391	NA	NA	NA	NA	NA	NA	NA
1418	NA	NA	NA	NA	NA	NA	NA	NA	NA	NA	NA	NA	NA
1419	NA	NA	NA	NA	NA	NA	NA	NA	NA	NA	NA	NA	NA
1420	-1.62176	-1.46945	-0.963123	-1.29842	-1.08505	NA	NA	NA	NA	NA	NA	NA	NA
1421	NA	NA	NA	NA	NA	NA	NA	NA	NA	NA	NA	NA	NA
1427	-0.99009	-1.33096	-1.47675	-1.00126	-0.67496	-1.09967	-0.985495	-0.949848	NA	NA	NA	NA	NA
1428	1.68734	NA	NA	NA	NA	NA	NA	NA	NA	NA	NA	NA	NA
1429	-0.984887	0.325525	-0.783226	-0.284245	-0.174292	-0.0475179	0.42766	0.720769	0.353462	-0.156656	0.0932622	-0.455497	-0.305018
1431	0.540948	0.421212	0.533704	0.377277	0.241955	-0.0977231	-0.300051	-0.443638	-0.0376604	0.165822	-0.206379	-0.122317	NA
1432	0.25355	0.286552	-0.0465154	0.263941	-0.151412	-0.483657	-0.400301	-0.574095	0.0942956	-0.480546	-0.117047	-0.547077	0.787003
1434	1.33178	1.10932	0.917236	0.810359	1.31576	1.37165	1.17186	1.15099	1.79152	1.76237	1.59257	1.37075	1.86219
1435	NA	NA	NA	NA	NA	NA	NA	NA	NA	NA	NA	NA	NA
1436	-0.919012	-1.4566	-0.546905	-0.464989	-0.529999	-0.534706	-0.281478	0.112161	-0.841254	-0.578996	NA	NA	NA
1437	NA	NA	NA	NA	NA	NA	NA	NA	NA	NA	NA	NA	NA
1438	-1.16028	-1.65529	-1.31553	-1.57572	-0.910875	-0.93112	-1.04904	-0.564194	-0.78723	NA	NA	NA	NA
1439	NA	NA	NA	NA	NA	NA	NA	NA	NA	NA	NA	NA	NA
1440	-0.674486	-0.691458	-0.348515	-0.289493	-0.410753	0.265688	0.264242	-0.0164682	0.0116379	0.29338	-0.130026	0.0741277	0.00950884
1441	-1.05188	-1.56461	-1.2134	-1.10607	-1.28443	-1.06329	-0.650328	NA	NA	NA	NA	NA	NA
1442	NA	NA	NA	NA	NA	NA	NA	NA	NA	NA	NA	NA	NA
1443	NA	NA	NA	NA	NA	NA	NA	NA	NA	NA	NA	NA	NA
1444	NA	NA	NA	NA	NA	NA	NA	NA	NA	NA	NA	NA	NA
1445	-0.168239	-0.468648	0.0170048	0.162693	-0.343724	0.21467	-0.690694	0.0240136	-0.65368	-0.509391	-0.420665	-0.706005	1.68516
1446	NA	NA	NA	NA	NA	NA	NA	NA	NA	NA	NA	NA	NA
1447	NA	NA	NA	NA	NA	NA	NA	NA	NA	NA	NA	NA	NA
1448	-0.838658	-0.887827	-0.492989	-0.751758	-0.717761	-0.506983	0.122604	-0.40389	-0.126502	-0.142812	0.000638554	-0.292572	NA
1452	1.17253	0.863153	0.373745	0.545147	1.05288	1.51034	0.464704	0.720533	0.979746	0.82921	1.58828	1.31074	1.14492
1453	1.41106	1.41372	1.16339	1.12994	1.24514	1.61367	0.761385	1.47336	1.08158	1.40033	1.41024	1.06726	NA
1454	0.582612	0.546532	0.655622	1.09646	1.09962	1.15012	0.57179	1.01628	0.732596	0.447267	0.504457	0.792713	1.27251
1455	NA	NA	NA	NA	NA	NA	NA	NA	NA	NA	NA	NA	NA
1456	0.221687	0.194067	-0.435032	-0.26975	-0.110905	0.273026	-0.755026	-0.76307	-0.804875	-0.633559	-0.474705	-0.551594	-0.34273
1457	-0.193913	0.073547	-0.201202	-0.496826	-0.215522	-0.339205	-0.288659	-0.567706	0.0656803	0.303982	-0.0964109	-0.298471	0.0169861
1459	0.0604283	-0.0624834	-0.0630544	0.154374	0.461804	0.606096	1.17166	0.725327	0.537626	0.580639	0.77756	0.660146	1.62473
1460	NA	NA	NA	NA	NA	NA	NA	NA	NA	NA	NA	NA	NA
1462	-1.5451	-1.30697	-0.719873	-1.38037	-1.17331	-0.594074	-1.00424	-1.16885	-0.988371	-1.04821	-1.3656	NA	NA
1463	-0.833769	-0.755844	NA	NA	NA	NA	NA	NA	NA	NA	NA	NA	NA
1464	-1.6128	-0.584389	-1.39306	-1.20692	-1.24875	-0.814422	NA	NA	NA	NA	NA	NA	NA
1465	-1.29981	-0.702744	0.691817	0.20118	-0.0757278	0.827971	0.39156	0.314219	0.335967	-0.175927	0.286635	-0.310385	2.11268
1466	-1.34567	-0.420485	0.127682	-1.33707	0.211627	0.38817	-0.635487	0.246494	-0.86991	-0.430926	-0.19735	0.532879	NA
1468	NA	NA	NA	NA	NA	NA	NA	NA	NA	NA	NA	NA	NA
1469	NA	NA	NA	NA	NA	NA	NA	NA	NA	NA	NA	NA	NA
1470	1.54958	2.5331	2.20069	2.36494	2.46261	3.25566	2.78608	2.96719	2.81584	2.21599	3.07854	2.22335	3.12725
1471	-0.848228	-1.3134	-1.35098	-1.38122	-0.119321	-0.859439	-0.881684	-0.914602	-0.875877	-0.857609	NA	NA	NA
1472	NA	NA	NA	NA	NA	NA	NA	NA	NA	NA	NA	NA	NA
1473	-1.37304	-1.3316	-1.25715	-1.20377	-1.13631	-1.13074	NA	NA	NA	NA	NA	NA	NA
1474	-0.95823	-1.48173	-1.20265	-0.12008	-0.339755	0.00616403	0.151725	-0.492761	1.6738	-0.894061	-0.680546	NA	NA
1475	NA	NA	NA	NA	NA	NA	NA	NA	NA	NA	NA	NA	NA
1476	NA	NA	NA	NA	NA	NA	NA	NA	NA	NA	NA	NA	NA
1477	0.704587	0.700105	0.175254	0.265345	0.985209	0.428092	0.610484	0.879489	1.11826	0.989331	0.877762	1.15509	NA
1478	-1.24049	-1.41248	-1.06919	-0.801292	-0.901042	-0.873573	-0.892611	-0.980317	-0.826159	NA	NA	NA	NA
1479	0.115599	-0.273685	-0.640458	-0.126655	0.220771	0.0875407	-0.0355787	-0.337283	-0.225046	-0.23212	0.299206	-0.0948051	-0.0302076
1482	NA	NA	NA	NA	NA	NA	NA	NA	NA	NA	NA	NA	NA
1486	-0.236071	-0.0739715	-0.215377	-0.454812	-0.0320602	-0.425872	0.127865	-0.301792	0.0611243	-0.397486	0.233063	0.128429	NA
1487	NA	NA	NA	NA	NA	NA	NA	NA	NA	NA	NA	NA	NA
1488	1.40621	1.83478	1.32309	1.40323	1.46145	1.21302	1.47622	1.26238	1.2274	1.37593	1.55947	1.50451	2.07685
1489	-1.30611	-1.63247	-0.963554	-1.08112	-0.746197	-0.767337	0.0795127	-0.741517	-0.294744	-0.546458	-0.462191	-0.569325	NA
1490	0.829623	1.91316	0.757313	-0.0312911	-0.0169533	1.53873	0.159458	1.70082	0.419881	1.30969	0.281629	0.774815	NA
1491	-0.983729	-0.991701	-0.960754	-1.3395	-1.0973	-0.91537	NA	NA	NA	NA	NA	NA	NA
1493	NA	NA	NA	NA	NA	NA	NA	NA	NA	NA	NA	NA	NA
1495	0.893125	0.45363	0.694936	0.564059	0.221297	0.339196	-0.087529	0.347706	-0.30645	0.388671	-0.169336	-0.0507735	NA
1496	-0.571124	0.208467	-1.44946	-1.24545	-1.16436	-0.72008	-1.29186	-0.345466	-0.695972	-0.810893	-0.882475	NA	NA
1497	-1.39857	-1.11803	NA	NA	NA	NA	NA	NA	NA	NA	NA	NA	NA
1499	-0.476553	-1.43922	-1.21319	-0.829373	-0.94381	-1.38913	NA	NA	NA	NA	NA	NA	NA
1500	0.466123	0.524447	0.686074	0.402867	0.409296	-0.656425	-0.183121	-0.330369	-0.382648	-0.146466	-0.392931	-0.390662	0.179754
1501	0.542042	0.758331	-0.386169	-0.090067	0.231075	-0.692101	-0.560627	0.161461	0.423169	0.432332	-0.0415191	0.552985	NA
1503	-0.371993	-0.276122	0.326557	0.0594994	-0.272917	1.06779	0.276454	-0.0442937	0.441002	0.187039	0.0944849	0.0901033	0.556064
1504	-0.603569	NA	NA	NA	NA	NA	NA	NA	NA	NA	NA	NA	NA
1506	-1.46434	-1.29842	-1.51635	-1.1767	-1.23202	-0.960915	-0.838705	-1.2072	NA	NA	NA	NA	NA
1508	2.09654	1.40054	1.23679	1.40196	1.55437	1.94564	1.98159	1.93365	2.27786	0.79978	1.4105	1.55916	2.36501
1509	1.69347	1.76241	1.24641	1.69393	1.35577	1.43343	1.63738	1.28746	1.48569	1.4427	1.27193	0.95343	2.11351
1510	NA	NA	NA	NA	NA	NA	NA	NA	NA	NA	NA	NA	NA
1511	-1.60857	-1.57217	-0.710263	NA	NA	NA	NA	NA	NA	NA	NA	NA	NA
1512	0.450554	1.67731	0.0613741	0.819821	0.052593	2.27956	1.25459	1.89097	1.54985	1.54155	1.45501	1.17682	3.1683
1513	-0.212304	-0.546251	0.250748	0.714032	0.425002	0.70116	-0.373875	-0.207309	-0.246681	-0.560522	-0.280858	-0.584675	0.607037
1514	1.76339	1.72454	1.46386	1.62074	1.69084	1.84416	2.231	2.46567	2.19027	1.87232	2.52395	2.38195	2.2912
1515	-1.22092	-1.39075	-1.50709	1.51546	-1.13391	-0.648484	NA	NA	NA	NA	NA	NA	NA
1518	NA	NA	NA	NA	NA	NA	NA	NA	NA	NA	NA	NA	NA
1519	-1.79854	-0.996551	-1.27336	-1.02522	NA	NA	NA	NA	NA	NA	NA	NA	NA
1520	-1.33208	-1.64409	-1.13229	-1.07349	0.183654	-0.275018	-0.197114	-0.671727	-0.251544	NA	NA	NA	NA
1521	NA	NA	NA	NA	NA	NA	NA	NA	NA	NA	NA	NA	NA
1522	-1.62187	-0.809796	NA	NA	NA	NA	NA	NA	NA	NA	NA	NA	NA
1523	-0.793538	-0.823651	-0.729081	-0.48263	-0.525753	-0.795831	-0.879761	-1.22013	NA	NA	NA	NA	NA
1524	-0.638406	-1.46434	-1.14401	NA	NA	NA	NA	NA	NA	NA	NA	NA	NA
1525	-1.53555	-1.4088	-1.27774	NA	NA	NA	NA	NA	NA	NA	NA	NA	NA
1527	NA	NA	NA	NA	NA	NA	NA	NA	NA	NA	NA	NA	NA
1528	0.716207	0.09562	-0.034866	-0.177149	0.195966	0.627848	0.471682	-0.0462349	0.868601	0.182637	-0.0950373	0.0468856	1.79495
1534	1.46476	0.761737	0.96045	0.619949	1.5633	0.887375	0.70358	0.798477	1.13794	1.4541	1.24436	1.22343	0.504744
1535	-0.975552	-1.54946	-0.417279	-0.59241	0.407014	0.138494	0.0478996	0.270966	-0.681898	-0.209098	0.385471	NA	NA
1536	-1.62859	-1.24027	-1.27858	-0.888573	NA	NA	NA	NA	NA	NA	NA	NA	NA
1537	1.56986	1.36789	1.94348	1.5922	1.29122	2.41284	1.95553	1.7836	2.00173	1.9242	1.85862	1.58719	2.74353
1538	NA	NA	NA	NA	NA	NA	NA	NA	NA	NA	NA	NA	NA
1539	NA	NA	NA	NA	NA	NA	NA	NA	NA	NA	NA	NA	NA
1540	0.218125	0.130451	-0.554642	-0.266517	0.293546	-0.536881	-0.586504	0.108253	-0.501432	-0.17969	-0.438942	0.000581418	0.199276
1543	-1.141	-1.1771	-1.4675	-1.35558	NA	NA	NA	NA	NA	NA	NA	NA	NA
1544	-1.03443	-1.0095	-1.18591	-0.946136	-0.940121	-0.993092	-1.27442	-1.04691	-1.32608	-0.931693	-0.816491	NA	NA
1545	-1.07155	-0.315541	0.918085	-1.20678	-0.971789	-0.65287	NA	NA	NA	NA	NA	NA	NA
1548	NA	NA	NA	NA	NA	NA	NA	NA	NA	NA	NA	NA	NA
1549	0.243216	0.243304	0.542721	0.330234	0.590856	0.364791	0.619197	0.271649	0.07212	0.0922104	0.172838	0.260841	0.230169
1550	NA	NA	NA	NA	NA	NA	NA	NA	NA	NA	NA	NA	NA
1551	NA	NA	NA	NA	NA	NA	NA	NA	NA	NA	NA	NA	NA
1553	-0.971354	NA	NA	NA	NA	NA	NA	NA	NA	NA	NA	NA	NA
1555	NA	NA	NA	NA	NA	NA	NA	NA	NA	NA	NA	NA	NA
1556	NA	NA	NA	NA	NA	NA	NA	NA	NA	NA	NA	NA	NA
1557	NA	NA	NA	NA	NA	NA	NA	NA	NA	NA	NA	NA	NA
1558	0.389697	-1.03998	-0.0434944	-0.552321	0.300461	-0.327759	-1.21942	-0.379197	-0.621513	-0.790983	NA	NA	NA
1559	-0.966525	-0.829139	-1.76745	-1.40959	-0.818748	NA	NA	NA	NA	NA	NA	NA	NA
1562	-0.708582	NA	NA	NA	NA	NA	NA	NA	NA	NA	NA	NA	NA
1564	NA	NA	NA	NA	NA	NA	NA	NA	NA	NA	NA	NA	NA
1565	-0.03283	-0.124407	-0.641677	0.0569402	-0.361967	-0.321482	-0.698804	-0.0767831	-0.395352	-0.72532	-0.418027	-0.479362	-0.750044
1571	-1.46185	-1.73625	-1.71646	NA	NA	NA	NA	NA	NA	NA	NA	NA	NA
1572	-1.04027	-1.12283	-0.34613	-0.2124	-0.742366	-0.230872	-0.35862	-0.263346	-0.75481	-0.909195	-0.663459	-0.407404	NA
1573	-1.72011	-0.924891	-0.677412	-1.13417	NA	NA	NA	NA	NA	NA	NA	NA	NA
1576	NA	NA	NA	NA	NA	NA	NA	NA	NA	NA	NA	NA	NA
1577	NA	NA	NA	NA	NA	NA	NA	NA	NA	NA	NA	NA	NA
1579	-1.47787	-1.36911	-1.1541	-1.42013	-0.934145	-0.721948	-1.05337	-1.2599	NA	NA	NA	NA	NA
1580	-0.0141238	NA	NA	NA	NA	NA	NA	NA	NA	NA	NA	NA	NA
1581	NA	NA	NA	NA	NA	NA	NA	NA	NA	NA	NA	NA	NA
1582	-1.34649	-1.29009	-1.32107	-1.44983	-1.28764	-1.34567	-1.06871	-1.04391	NA	NA	NA	NA	NA
1583	-1.12347	-1.10224	-0.791789	-1.0384	-0.611981	-0.408262	-0.741304	-0.532197	-0.676778	-0.178303	NA	NA	NA
1584	NA	NA	NA	NA	NA	NA	NA	NA	NA	NA	NA	NA	NA
1585	NA	NA	NA	NA	NA	NA	NA	NA	NA	NA	NA	NA	NA
1586	-1.00531	-1.27238	-1.08998	-1.37338	-0.96685	-1.08992	-0.92427	-1.11797	-1.13644	-1.00899	NA	NA	NA
1587	-1.33361	-0.196902	NA	NA	NA	NA	NA	NA	NA	NA	NA	NA	NA
1588	NA	NA	NA	NA	NA	NA	NA	NA	NA	NA	NA	NA	NA
1589	-1.44265	-1.28894	-1.41283	-1.32496	-1.27035	-1.44075	-1.17799	-1.21241	-0.226725	NA	NA	NA	NA
1591	NA	NA	NA	NA	NA	NA	NA	NA	NA	NA	NA	NA	NA
1592	-0.933257	-0.0649945	NA	NA	NA	NA	NA	NA	NA	NA	NA	NA	NA
1593	-1.04367	0.148175	-1.21949	-0.114305	-1.13307	-0.520222	0.097869	0.818562	0.239236	-0.309852	-0.274249	1.06496	NA
1594	-0.52875	-1.46444	-0.641106	-0.232047	-0.935348	-0.94693	-1.24414	-0.657238	-0.841727	-0.876564	-0.756491	-1.17765	NA
1595	1.08963	0.808251	0.451584	-0.0360343	0.685219	1.32017	1.28685	1.31697	1.51362	1.42098	1.06995	1.46783	1.62934
1600	-0.754337	-0.542581	-0.813275	-0.177449	-0.182634	0.336828	0.778654	0.234055	-0.33583	-0.393835	-0.29574	0.680259	0.19966
1601	-1.03286	-0.808564	-0.845043	-0.873867	-0.842673	-0.520523	-1.08948	-1.36046	-0.829326	-0.92396	-0.333396	NA	NA
1602	0.0305457	-0.0416985	0.368357	0.0354193	0.3317	0.216105	0.247326	0.30716	0.103732	-0.104781	0.386991	0.263626	-0.553463
1603	2.61057	2.12959	2.4122	2.13692	2.3828	2.39703	3.24327	2.44787	2.82003	2.52087	2.47269	2.64875	2.85254
1604	2.07474	2.59123	2.00931	0.846853	2.07533	2.01664	0.759549	2.03685	1.80848	1.44282	1.93144	2.51692	3.0306
1605	1.08134	0.706731	1.4443	1.27904	1.30903	1.27824	1.4043	1.21181	1.04986	1.0983	1.75905	1.10116	0.969473
1606	-0.850326	NA	NA	NA	NA	NA	NA	NA	NA	NA	NA	NA	NA
1607	-1.4745	-1.13365	-0.385504	0.341387	-0.652832	0.142326	NA	NA	NA	NA	NA	NA	NA
1608	-1.27608	-0.161771	-1.32369	-1.0288	-1.22434	-0.766421	-1.16161	-0.879958	NA	NA	NA	NA	NA
1609	-1.29509	-1.69151	NA	NA	NA	NA	NA	NA	NA	NA	NA	NA	NA
1610	NA	NA	NA	NA	NA	NA	NA	NA	NA	NA	NA	NA	NA
1611	0.742344	0.689095	-0.0469564	0.613161	0.848402	0.92122	0.663876	-0.149753	0.983108	0.953988	1.11821	1.01314	1.28063
1612	0.300929	1.00125	0.592224	0.376224	0.811082	0.886658	0.832683	0.627858	0.746762	0.617056	0.732354	0.596438	0.0540324
1613	0.185746	-0.472068	0.208984	0.0224338	-0.378423	-0.420035	-0.435551	-0.0514381	-0.483111	-0.312171	-0.421896	0.158672	NA
1615	0.917696	0.766389	1.33757	1.1841	1.23463	1.72638	1.74721	1.5262	1.34492	1.45641	1.43113	1.37719	2.24771
1616	-0.863788	-0.575371	-0.702459	-0.60145	-0.913988	-0.961453	-1.27178	-1.12816	-1.10418	-0.535691	NA	NA	NA
1617	NA	NA	NA	NA	NA	NA	NA	NA	NA	NA	NA	NA	NA
1618	NA	NA	NA	NA	NA	NA	NA	NA	NA	NA	NA	NA	NA
1620	NA	NA	NA	NA	NA	NA	NA	NA	NA	NA	NA	NA	NA
1621	NA	NA	NA	NA	NA	NA	NA	NA	NA	NA	NA	NA	NA
1622	1.28446	1.97929	1.69273	1.90009	1.54011	2.74144	2.66564	3.06827	2.66301	1.42134	1.68788	1.77448	3.16644
1627	1.19131	0.824958	0.305408	1.59782	0.985163	1.95747	1.34073	0.490052	0.903687	1.08486	0.590564	1.12756	1.8667
1628	0.275308	0.892296	0.395833	0.760262	0.672436	1.16798	1.39358	1.89874	1.39379	1.11548	0.87106	1.65911	1.31391
1629	-0.957372	-0.529256	-1.24384	-0.690172	-0.850087	-1.01086	-0.951338	-1.2804	-0.732353	-0.672711	-1.00064	NA	NA
1630	NA	NA	NA	NA	NA	NA	NA	NA	NA	NA	NA	NA	NA
1632	1.69536	1.74312	1.57737	1.4008	1.64856	2.32861	2.23429	2.07235	1.98537	2.63982	2.46864	2.17878	1.65692
1633	-0.168353	0.215229	-0.283313	-0.112883	-0.0944884	-0.116593	0.01271	0.299551	-0.41489	-0.471212	-0.432962	-0.336406	0.257181
1634	NA	NA	NA	NA	NA	NA	NA	NA	NA	NA	NA	NA	NA
1635	-0.187544	0.410728	0.262163	0.37895	0.242659	0.427059	0.532879	0.899273	0.833466	0.588648	0.790094	0.70242	1.42755
1636	-1.4203	NA	NA	NA	NA	NA	NA	NA	NA	NA	NA	NA	NA
1638	NA	NA	NA	NA	NA	NA	NA	NA	NA	NA	NA	NA	NA
1639	NA	NA	NA	NA	NA	NA	NA	NA	NA	NA	NA	NA	NA
1641	-0.29763	-0.316051	-0.430259	-0.376504	0.193186	0.254448	1.16787	0.347876	0.769666	0.527374	0.831449	0.526392	-0.0893112
1642	1.41368	1.25698	1.13842	0.934607	1.05031	-0.0583133	0.157611	0.323915	0.501445	0.6525	0.752159	0.163444	0.694558
1643	-1.61063	-1.37078	-0.932944	-1.05224	-0.716066	NA	NA	NA	NA	NA	NA	NA	NA
1644	-1.62992	-1.71634	-1.04179	NA	NA	NA	NA	NA	NA	NA	NA	NA	NA
1645	NA	NA	NA	NA	NA	NA	NA	NA	NA	NA	NA	NA	NA
1646	-0.944496	-0.9866	NA	NA	NA	NA	NA	NA	NA	NA	NA	NA	NA
1647	1.22664	1.45919	1.10613	0.646194	1.49947	2.58086	1.67227	1.57805	2.05475	1.57293	1.97948	1.70298	2.84938
1649	0.764162	0.643629	0.209106	0.532525	1.17355	0.673882	0.0823243	1.01403	0.459961	0.757675	0.510473	0.831123	0.937265
1650	1.70181	1.24249	1.31757	1.34829	1.88473	2.03715	1.9097	1.47785	2.06298	1.76714	1.98644	1.98576	1.71147
1652	1.25627	1.0317	1.32593	1.3516	1.29943	2.14834	1.99615	1.86851	1.87941	1.72731	1.90264	1.91118	2.91591
1653	2.17658	2.08573	2.01283	2.045	2.02311	2.96332	2.63789	2.57891	2.46217	2.51691	2.18982	2.28578	2.93358
1654	NA	NA	NA	NA	NA	NA	NA	NA	NA	NA	NA	NA	NA
1655	0.143355	-0.368128	0.0544997	-0.307299	0.266332	0.593932	0.0320381	0.4948	0.802852	0.872249	0.806314	0.829031	0.410312
1656	-0.747221	-0.601523	-0.778488	-0.704903	-0.555266	-0.856359	-0.575974	-0.728118	-0.743258	-0.585069	-0.430471	-0.533349	NA
1657	0.631007	0.58247	-0.522732	-0.203479	0.659791	-0.110368	-0.199026	-0.108802	0.14092	0.3949	-0.0502704	0.0912438	NA
1659	-0.314952	-0.386169	-0.969452	-0.711289	-0.283624	-0.27643	-0.119256	-0.232733	-0.267534	-0.219813	-0.222959	-0.50616	-0.070942
1660	NA	NA	NA	NA	NA	NA	NA	NA	NA	NA	NA	NA	NA
1662	-0.329335	-0.277998	0.0239022	-0.416233	-0.574095	-0.709894	-0.761681	-0.100714	-0.243453	-0.161635	-0.231729	-0.366287	-0.50695
1663	NA	NA	NA	NA	NA	NA	NA	NA	NA	NA	NA	NA	NA
1665	0.754617	1.07966	0.274954	0.68152	0.593239	0.356035	0.0176408	0.155728	0.712285	0.571728	0.566646	0.177868	0.993722
1666	-1.24765	-0.388021	-0.800839	-0.757699	-0.77439	-0.155123	-0.00281496	0.269429	-0.82078	NA	NA	NA	NA
1667	NA	NA	NA	NA	NA	NA	NA	NA	NA	NA	NA	NA	NA
1668	NA	NA	NA	NA	NA	NA	NA	NA	NA	NA	NA	NA	NA
1669	-0.618275	-1.04833	0.292908	-0.307644	0.732467	-0.312732	1.09205	-0.402564	0.351313	0.270739	0.50576	0.12954	-0.15826
1670	NA	NA	NA	NA	NA	NA	NA	NA	NA	NA	NA	NA	NA
1671	NA	NA	NA	NA	NA	NA	NA	NA	NA	NA	NA	NA	NA
1672	-1.21864	-0.191989	-0.736944	0.997436	-1.20622	NA	NA	NA	NA	NA	NA	NA	NA
1673	-0.141856	-0.296973	-0.469249	-0.477127	-0.33225	-0.445239	-0.659683	-0.501759	-0.722696	-0.576329	-0.52488	-0.303139	-0.730128
1674	NA	NA	NA	NA	NA	NA	NA	NA	NA	NA	NA	NA	NA
1675	-1.17351	-1.67986	-0.601779	-1.33853	-0.594617	NA	NA	NA	NA	NA	NA	NA	NA
1676	1.02212	1.04781	0.869101	0.617085	1.12809	1.46912	1.16017	0.879858	1.23715	1.50659	1.05844	1.01228	1.71973
1677	-0.196949	-0.112689	-0.139992	-0.247925	-0.175512	-0.131651	-0.154244	-0.360981	-0.115362	-0.119039	-0.0488027	-0.105592	-0.447955
1678	-1.36261	-1.59354	-1.35254	-1.38487	-1.16657	-1.06738	-1.08283	NA	NA	NA	NA	NA	NA
1687	-0.123231	-1.44419	-0.916036	NA	NA	NA	NA	NA	NA	NA	NA	NA	NA
1690	-0.880796	0.450905	0.0060883	-1.05587	-1.09799	-0.183168	0.0327558	0.192474	0.0813299	-0.703191	0.551158	0.689285	NA
1716	NA	NA	NA	NA	NA	NA	NA	NA	NA	NA	NA	NA	NA
1717	-0.475406	-0.680029	0.267989	0.316944	0.0964619	-0.273378	0.334759	0.735254	0.276539	-0.0502302	0.33448	-0.116096	0.26245
1718	-0.759255	-0.910722	-1.05432	0.128711	-0.870056	0.898306	-0.0284568	0.799804	0.0546434	-0.88599	-0.0262388	NA	NA
1719	0.612129	0.159683	-0.0891013	-0.47566	-0.235948	0.683426	-0.207976	0.074708	-0.2481	0.38986	0.752446	-0.158757	0.665076
1720	NA	NA	NA	NA	NA	NA	NA	NA	NA	NA	NA	NA	NA
1723	-0.907061	-0.935505	-1.42562	-1.12212	-1.22563	-1.02159	-0.982792	-1.23831	-0.641029	-0.85109	-0.355118	NA	NA
1725	NA	NA	NA	NA	NA	NA	NA	NA	NA	NA	NA	NA	NA
1727	2.5918	2.53434	2.22354	2.43066	2.45181	2.93071	3.0592	3.14128	2.94979	2.78791	2.5356	2.64385	3.54249
1728	-1.06113	-1.05629	-0.656386	-0.651406	NA	NA	NA	NA	NA	NA	NA	NA	NA
1729	1.80241	0.882816	0.882698	1.36263	1.56733	1.55587	0.436231	1.20992	0.928599	0.741899	1.1421	1.37466	1.75779
1730	0.854323	0.918941	0.999259	0.998156	1.02801	1.30506	1.60026	1.23721	1.42965	1.33375	1.37154	1.30469	0.688687
1731	-1.34007	-1.33724	-1.51949	-1.15881	-1.00042	-0.868205	-0.920247	-0.673184	NA	NA	NA	NA	NA
1733	-1.72244	NA	NA	NA	NA	NA	NA	NA	NA	NA	NA	NA	NA
1734	1.08826	-1.27073	-0.0490037	1.55715	0.58889	1.80907	1.33118	2.13262	1.57776	1.44719	0.632953	0.701714	0.550947
1735	-1.46028	-1.63849	-1.26459	NA	NA	NA	NA	NA	NA	NA	NA	NA	NA
1736	0.800254	0.956971	1.14931	1.08915	0.972839	0.949733	0.96598	1.1319	1.15014	0.691284	1.07744	0.932918	1.80368
1737	0.260553	0.483777	0.800157	0.482623	0.63328	0.886043	1.27728	0.889478	0.891198	0.861779	0.7015	0.868959	0.361443
1738	1.01466	0.977461	0.636775	0.842627	0.704177	1.27711	0.823063	0.635346	1.12558	0.836685	1.21428	1.07536	1.51917
1739	NA	NA	NA	NA	NA	NA	NA	NA	NA	NA	NA	NA	NA
1740	-1.4959	-1.68525	-1.17013	-0.94746	-0.786027	-0.663615	-0.0925278	-1.08948	-0.408677	NA	NA	NA	NA
1741	-0.184958	-0.126896	-0.477446	-0.081079	-0.227894	0.21814	-0.00488177	0.104277	-0.182216	-0.153502	-0.261802	0.486599	NA
1742	0.759784	0.341941	-0.561465	0.0490752	0.186993	-0.620209	0.284297	-0.291657	0.361146	0.413647	0.390648	0.231609	-0.293958
1743	0.10477	-0.286658	-0.0149175	-0.136452	-0.172476	-0.255779	-0.397516	-0.811488	-0.00603199	-0.353191	-0.429652	-0.215786	0.228979
1745	NA	NA	NA	NA	NA	NA	NA	NA	NA	NA	NA	NA	NA
1746	-0.942913	NA	NA	NA	NA	NA	NA	NA	NA	NA	NA	NA	NA
1747	NA	NA	NA	NA	NA	NA	NA	NA	NA	NA	NA	NA	NA
1748	0.477755	0.523245	0.847128	0.586869	0.743915	0.608618	0.708036	0.565829	0.635797	0.5733	0.679097	0.556283	0.231906
1749	-1.4403	-0.955018	-0.991868	-1.06744	-0.563074	-0.817918	-0.923082	NA	NA	NA	NA	NA	NA
1750	NA	NA	NA	NA	NA	NA	NA	NA	NA	NA	NA	NA	NA
1755	NA	NA	NA	NA	NA	NA	NA	NA	NA	NA	NA	NA	NA
1756	-0.713386	0.658781	-0.905591	-0.440781	-0.705883	-1.19245	0.225235	-0.717347	-1.09631	-0.42557	NA	NA	NA
1757	NA	NA	NA	NA	NA	NA	NA	NA	NA	NA	NA	NA	NA
1758	-1.35386	-1.43427	NA	NA	NA	NA	NA	NA	NA	NA	NA	NA	NA
1759	NA	NA	NA	NA	NA	NA	NA	NA	NA	NA	NA	NA	NA
1760	-0.0750455	-0.208549	-0.209361	0.733917	0.111317	-0.814652	-0.289988	-0.699696	-0.376275	0.126569	-0.913528	NA	NA
1761	0.342862	0.610631	1.11822	1.33617	0.983972	0.464981	1.17347	1.35421	0.486723	0.441109	0.503528	1.19237	-0.0457743
1762	0.5347	0.844291	0.553614	1.22247	0.753841	0.0947774	1.15817	0.740966	1.14153	1.07415	0.734073	1.0663	0.904312
1763	-1.23245	-1.48893	-1.41563	-1.53435	-1.29911	NA	NA	NA	NA	NA	NA	NA	NA
1767	-1.13846	-1.23512	-1.29865	NA	NA	NA	NA	NA	NA	NA	NA	NA	NA
1768	NA	NA	NA	NA	NA	NA	NA	NA	NA	NA	NA	NA	NA
1769	NA	NA	NA	NA	NA	NA	NA	NA	NA	NA	NA	NA	NA
1770	NA	NA	NA	NA	NA	NA	NA	NA	NA	NA	NA	NA	NA
1773	-0.733951	-0.864999	NA	NA	NA	NA	NA	NA	NA	NA	NA	NA	NA
1774	0.0345568	0.17527	0.175049	0.450284	0.47846	0.723182	0.743002	0.681538	0.687291	0.378278	0.69426	0.62219	0.427023
1775	0.0304719	-0.240903	-0.446812	-0.643431	-0.406399	-0.790625	-0.723237	-1.19355	-0.306635	-0.932266	-1.0885	NA	NA
1776	-0.946824	-1.44501	-1.86834	-0.15826	-0.459871	-0.309825	-0.524712	-0.184306	NA	NA	NA	NA	NA
1777	0.204609	0.319795	-0.274531	-0.434484	-0.606829	0.287334	0.255938	0.0936412	0.137	-1.15781	0.346986	0.627045	NA
1778	2.72712	2.23762	2.32283	2.35834	2.42012	2.43404	2.55238	2.66405	2.60735	2.68696	2.7663	2.62875	3.0734
1780	1.21252	1.03676	-1.54127	-0.784426	1.05617	0.823854	1.10729	1.57822	0.995486	0.720603	1.19753	1.39573	2.00634
1781	0.127466	0.424231	0.178937	0.368127	0.166204	0.524479	0.150689	0.229395	0.60669	0.4366	0.256805	0.252143	1.08308
1783	-0.925305	-0.980592	-1.07873	-1.29904	-1.37111	-0.558953	NA	NA	NA	NA	NA	NA	NA
1785	-0.111012	-0.163861	0.0104892	-0.664435	-0.533179	-1.38981	-1.00593	-1.02909	-0.98948	-0.319085	NA	NA	NA
1786	-0.207976	-0.0650558	-0.0720538	-0.588877	-0.579067	0.213853	-1.2553	-0.526998	-0.421025	-0.854871	-0.720536	-0.210891	NA
1787	NA	NA	NA	NA	NA	NA	NA	NA	NA	NA	NA	NA	NA
1788	-1.34657	-1.46462	-1.41493	-1.12996	-1.3357	NA	NA	NA	NA	NA	NA	NA	NA
1789	-1.33112	-1.45321	-1.69601	-1.5701	-1.30479	-1.31798	NA	NA	NA	NA	NA	NA	NA
1791	NA	NA	NA	NA	NA	NA	NA	NA	NA	NA	NA	NA	NA
1793	0.0418354	-0.262485	0.0394094	0.133838	0.370442	-0.12008	-0.0247695	-0.0576235	-0.153794	-0.043135	-0.0984222	-0.125323	0.122971
1794	NA	NA	NA	NA	NA	NA	NA	NA	NA	NA	NA	NA	NA
1795	0.0258317	-0.244594	-1.58327	-0.533722	-0.192622	-0.696012	-1.0043	-1.16811	-0.903617	-0.989646	NA	NA	NA
1796	-1.52412	NA	NA	NA	NA	NA	NA	NA	NA	NA	NA	NA	NA
1797	0.664025	0.276949	0.476423	0.259905	0.497889	1.76538	0.994933	0.122354	0.831279	0.352564	0.537893	0.667147	0.726319
1798	NA	NA	NA	NA	NA	NA	NA	NA	NA	NA	NA	NA	NA
1800	0.635787	NA	NA	NA	NA	NA	NA	NA	NA	NA	NA	NA	NA
1801	-0.182959	-0.0997797	-0.445702	-1.11536	-0.352828	-0.511574	-0.166754	-0.397574	-0.115643	0.058158	-0.0972361	0.0643834	NA
1802	-0.0991431	-0.317634	0.206441	0.0772362	0.241588	0.0831261	0.490333	-0.058496	0.344782	0.103493	0.216407	0.0639922	-0.186518
1803	NA	NA	NA	NA	NA	NA	NA	NA	NA	NA	NA	NA	NA
1804	-0.294403	0.394303	-1.28703	0.876794	0.780026	0.373338	-1.15105	1.10429	-0.67757	-0.863788	0.438857	NA	NA
1805	NA	NA	NA	NA	NA	NA	NA	NA	NA	NA	NA	NA	NA
1806	0.10849	0.694621	-0.652793	-0.303377	-1.17074	-0.768516	0.498969	-0.867573	-0.157153	-0.296763	-1.00278	NA	NA
1807	NA	NA	NA	NA	NA	NA	NA	NA	NA	NA	NA	NA	NA
1808	-0.296842	-0.357639	-0.43882	0.399183	-0.59981	-0.341324	-0.492826	-0.636509	-0.297709	-0.835083	-0.823326	0.994328	NA
1809	NA	NA	NA	NA	NA	NA	NA	NA	NA	NA	NA	NA	NA
1810	NA	NA	NA	NA	NA	NA	NA	NA	NA	NA	NA	NA	NA
1811	-0.825554	NA	NA	NA	NA	NA	NA	NA	NA	NA	NA	NA	NA
1812	0.330327	NA	NA	NA	NA	NA	NA	NA	NA	NA	NA	NA	NA
1813	-0.418207	-0.645878	-0.700548	-0.419675	-0.2637	-0.367221	-0.169954	-0.442316	-0.521694	-0.470135	-0.365042	-0.263143	-0.493898
1814	-1.12289	-1.32305	-1.53296	-1.45816	-0.928312	-0.988648	-1.19238	-1.03723	-0.991145	NA	NA	NA	NA
1815	0.206685	0.494119	0.79463	0.527794	0.567628	0.441428	0.653206	0.579121	0.00854632	-0.248673	0.121585	0.311051	-0.420965
1816	NA	NA	NA	NA	NA	NA	NA	NA	NA	NA	NA	NA	NA
1819	-1.07715	-1.03158	-0.934459	-0.953149	-0.838988	-0.405749	-1.28192	-1.08253	-1.0968	-0.240582	NA	NA	NA
1820	-0.413996	-0.97506	0.572191	-0.0287713	-0.0463151	-0.0963052	-0.0207655	-0.742748	-0.223056	-0.969018	-0.429016	0.195827	-0.424997
1821	-0.964472	-0.882623	-1.25412	-0.920401	-1.04869	-0.816077	-0.734751	-1.20384	-0.749829	-0.659877	-0.777164	-0.715158	NA
1822	-1.34169	-0.69472	-0.729667	-0.779593	-0.945289	-1.18296	NA	NA	NA	NA	NA	NA	NA
1823	NA	NA	NA	NA	NA	NA	NA	NA	NA	NA	NA	NA	NA
1824	NA	NA	NA	NA	NA	NA	NA	NA	NA	NA	NA	NA	NA
1825	NA	NA	NA	NA	NA	NA	NA	NA	NA	NA	NA	NA	NA
1826	-1.63403	-1.38105	-1.7401	-1.04297	-0.920504	-1.06798	NA	NA	NA	NA	NA	NA	NA
1827	-0.504548	-1.29394	-1.38904	-1.64556	-1.12623	-1.29571	NA	NA	NA	NA	NA	NA	NA
1828	NA	NA	NA	NA	NA	NA	NA	NA	NA	NA	NA	NA	NA
1829	-0.946506	-1.32401	NA	NA	NA	NA	NA	NA	NA	NA	NA	NA	NA
1830	-0.846373	NA	NA	NA	NA	NA	NA	NA	NA	NA	NA	NA	NA
1831	0.780297	0.587345	-0.214224	0.475374	-0.0660991	0.992515	0.325056	1.48933	1.15426	-0.37516	0.408806	0.128595	0.487477
1832	-1.56999	-1.17785	-1.19314	NA	NA	NA	NA	NA	NA	NA	NA	NA	NA
1833	NA	NA	NA	NA	NA	NA	NA	NA	NA	NA	NA	NA	NA
1834	NA	NA	NA	NA	NA	NA	NA	NA	NA	NA	NA	NA	NA
1836	0.222092	0.497065	-0.713592	-0.237301	0.382033	0.794687	0.665439	1.12517	0.745953	-0.343392	0.986708	0.709986	0.495738
1837	-0.463259	0.489142	-0.483208	-0.236883	-0.31844	-0.203218	0.0222477	-0.360756	-0.436649	-0.760078	-0.0419178	-0.436252	NA
1838	-0.855687	-0.643622	-0.920813	-0.904022	-0.167051	-0.616679	-0.316587	-0.802062	-0.634579	-0.794661	-0.319488	NA	NA
1839	-0.859632	-0.519488	-0.203312	-0.577857	-0.864757	0.456824	-0.71743	-0.995155	-0.176964	-0.870593	-0.0933073	-0.912507	-0.232439
1840	-0.796731	-0.3038	-1.39633	-1.00204	-1.127	NA	NA	NA	NA	NA	NA	NA	NA
1841	-0.300604	0.116911	-0.0893741	-0.0463952	0.0797925	1.08795	0.184435	0.50407	0.215637	0.364122	0.320402	0.185169	1.42275
1842	-1.60976	-1.45284	-1.38521	-0.650675	NA	NA	NA	NA	NA	NA	NA	NA	NA
1843	1.06949	0.169463	-0.261878	0.564732	-0.0645448	1.00795	0.174054	-0.240384	0.739398	0.832497	1.50425	0.360165	0.939417
1844	-0.976207	-1.18153	-1.2079	-0.803059	-0.137535	-1.08339	-0.889917	-1.0346	-0.127464	-0.921689	NA	NA	NA
1845	-1.34388	-1.50496	-1.44012	-1.02683	-1.06623	-0.818979	-0.861418	-0.820226	-0.908585	-0.16032	NA	NA	NA
1846	0.293727	-0.514226	0.794008	0.0940373	0.101582	-0.106404	0.379228	-0.700711	0.504954	0.500258	0.243773	0.773477	-0.37762
1847	-0.996998	-1.48684	-0.455778	-0.984666	-0.76294	-0.851424	-0.496207	NA	NA	NA	NA	NA	NA
1848	0.63823	-0.224172	1.06719	1.31492	0.322234	0.0682687	1.01784	-0.406931	0.502033	-0.426627	0.1091	0.412683	0.253579
1849	-1.46536	-1.46342	-1.07004	NA	NA	NA	NA	NA	NA	NA	NA	NA	NA
1850	-0.33583	-0.599847	-0.75266	-1.44093	-0.36674	-0.486489	-1.16221	-0.990479	NA	NA	NA	NA	NA
1852	NA	NA	NA	NA	NA	NA	NA	NA	NA	NA	NA	NA	NA
1854	0.180021	0.463388	-0.117285	0.19433	-0.15249	1.45048	0.603229	1.06459	0.696869	1.01365	1.28786	0.688134	0.572283
1855	NA	NA	NA	NA	NA	NA	NA	NA	NA	NA	NA	NA	NA
1856	-0.418057	-0.788881	-0.971571	-0.932214	-1.03495	-0.505929	NA	NA	NA	NA	NA	NA	NA
1857	NA	NA	NA	NA	NA	NA	NA	NA	NA	NA	NA	NA	NA
1859	-0.340002	0.423869	-0.165797	0.148078	0.0954653	0.166172	0.118924	0.419517	-0.0442937	0.187164	-0.00231808	-0.263143	0.300075
1861	NA	NA	NA	NA	NA	NA	NA	NA	NA	NA	NA	NA	NA
1869	NA	NA	NA	NA	NA	NA	NA	NA	NA	NA	NA	NA	NA
1870	-1.28642	-1.36228	-0.654994	-0.11396	-0.249321	NA	NA	NA	NA	NA	NA	NA	NA
1871	-1.42402	-1.3588	-0.535079	-0.975115	-1.33627	-0.548006	-0.479107	NA	NA	NA	NA	NA	NA
1874	1.17905	1.32421	1.1131	1.0924	0.997404	2.33413	1.29116	1.75894	1.14451	1.18229	1.58429	1.39348	1.15086
1875	0.44358	-0.139438	1.41846	1.07095	0.755697	1.37984	1.38293	0.675556	1.07997	0.844229	1.23055	1.02192	1.54922
1876	-0.059288	-0.0862312	-0.0709215	-0.236957	-0.825136	-0.0401847	-0.738974	-0.476329	-0.181938	-0.0791673	-0.313748	-0.373989	0.0699313
1877	-1.31711	-1.55578	-1.48173	-1.24794	NA	NA	NA	NA	NA	NA	NA	NA	NA
1879	-1.3076	-1.68408	-1.1752	-0.855255	-1.25338	NA	NA	NA	NA	NA	NA	NA	NA
1880	NA	NA	NA	NA	NA	NA	NA	NA	NA	NA	NA	NA	NA
1889	NA	NA	NA	NA	NA	NA	NA	NA	NA	NA	NA	NA	NA
1890	-1.19813	-1.10871	-1.03594	-0.625848	-1.23802	-0.769084	-0.791162	-0.90392	-0.154537	NA	NA	NA	NA
1891	0.454412	0.731922	0.010753	0.862913	0.192536	1.11096	1.23481	1.14219	1.23628	1.57218	0.992065	0.94506	2.05191
1892	1.59697	1.7335	1.30081	1.43188	1.58313	2.00687	1.81498	2.19884	1.87449	2.16345	1.81412	1.80185	2.55248
1893	-1.13911	-0.219547	-0.854871	-0.762419	-1.36369	-0.891063	-0.621625	-0.427987	-0.250045	NA	NA	NA	NA
1894	0.316456	0.375919	0.695763	-0.481988	-0.000256977	0.906184	-0.574414	0.657648	-0.753262	0.233315	0.714103	-0.564861	0.974171
1896	-1.45138	-1.08038	-1.16919	-1.06311	-1.4068	-0.898072	0.0553079	NA	NA	NA	NA	NA	NA
1901	-1.35025	-0.897419	-1.33942	-0.110454	NA	NA	NA	NA	NA	NA	NA	NA	NA
1902	NA	NA	NA	NA	NA	NA	NA	NA	NA	NA	NA	NA	NA
1903	0.392546	-0.592736	0.848074	0.431483	-0.450897	0.205037	1.23713	0.228264	1.03814	-0.023244	0.340886	0.427744	0.465523
1906	NA	NA	NA	NA	NA	NA	NA	NA	NA	NA	NA	NA	NA
1907	-1.46676	NA	NA	NA	NA	NA	NA	NA	NA	NA	NA	NA	NA
1908	1.11666	NA	NA	NA	NA	NA	NA	NA	NA	NA	NA	NA	NA
1909	-1.52481	-1.64589	-0.735215	-1.00588	-0.819394	-0.750301	-1.22327	-0.926496	NA	NA	NA	NA	NA
1910	-0.106426	-0.906452	-0.733951	NA	NA	NA	NA	NA	NA	NA	NA	NA	NA
1911	0.72771	1.47476	-0.186215	1.29429	1.2052	-0.120774	-0.279028	0.915699	0.426001	0.494286	0.341769	0.429723	0.59145
1912	0.455637	0.330074	0.608362	0.50018	0.361069	1.06204	0.354126	0.338906	0.675088	0.288731	0.470926	1.12295	NA
1915	4.13361	3.88689	4.27614	4.50212	4.40123	4.15752	4.76084	4.10821	4.36607	4.25952	4.57841	4.31699	4.63802
1917	1.74897	1.95737	1.86328	1.7105	1.32202	1.78347	1.86039	1.66307	1.849	2.53199	0.893626	1.56407	0.687037
1933	1.70027	1.27767	1.77958	1.81734	2.09046	2.68751	2.79278	2.29153	2.87822	2.61531	2.83776	2.59956	3.04004
1936	1.92313	1.26353	2.00773	1.96333	1.83255	1.95576	1.7863	2.14865	2.05764	2.03809	1.91572	3.17023	NA
1937	NA	NA	NA	NA	NA	NA	NA	NA	NA	NA	NA	NA	NA
1938	2.74309	2.08749	3.0184	2.76562	2.50873	2.83453	3.46944	2.57672	2.76094	3.01195	2.4425	2.87517	2.60075
1939	-1.41055	-1.25982	-0.62155	-1.08541	-1.14159	-0.775181	-1.03082	-1.19771	-0.886883	-0.69767	-0.704088	0.476457	NA
1942	-1.027	-0.895363	-1.04356	-0.725528	-0.467416	-0.55843	NA	NA	NA	NA	NA	NA	NA
1943	-1.67392	-1.41432	-1.38904	-1.21538	-0.868157	-1.23116	-1.0919	-1.10827	NA	NA	NA	NA	NA
1944	0.580456	0.367704	0.291754	0.335025	0.141067	0.254448	0.0508809	-0.226481	-0.124538	-0.565457	-0.241175	-0.268654	NA
1945	-1.58866	NA	NA	NA	NA	NA	NA	NA	NA	NA	NA	NA	NA
1946	-1.4088	-1.2378	NA	NA	NA	NA	NA	NA	NA	NA	NA	NA	NA
1947	-1.27759	-1.27178	-1.28435	-1.49351	-1.25154	-1.20819	NA	NA	NA	NA	NA	NA	NA
1948	-1.42287	-1.07599	-1.21921	-1.11124	-0.982022	NA	NA	NA	NA	NA	NA	NA	NA
1949	-1.38657	NA	NA	NA	NA	NA	NA	NA	NA	NA	NA	NA	NA
1950	0.229767	0.145166	0.459416	0.487815	0.65135	0.861238	1.41051	0.944462	0.818664	0.732614	0.731498	0.634952	0.650661
1951	0.908423	0.52305	1.036	0.974764	0.850352	0.296567	0.0315593	0.374152	0.422638	0.606334	0.662172	0.369522	0.449041
1952	-1.26668	-1.30346	-1.25886	NA	NA	NA	NA	NA	NA	NA	NA	NA	NA
1953	-1.50777	0.557923	NA	NA	NA	NA	NA	NA	NA	NA	NA	NA	NA
1954	-0.000142606	-0.335721	-0.319435	0.512601	-0.202838	0.25588	0.0875754	0.316876	-0.0977866	-0.167942	-0.51712	-0.577537	0.088719
1955	NA	NA	NA	NA	NA	NA	NA	NA	NA	NA	NA	NA	NA
1956	-1.39616	-1.37868	-1.73923	-1.53806	-1.27585	NA	NA	NA	NA	NA	NA	NA	NA
1958	-0.59093	-1.23072	-0.407789	0.192814	-0.274633	-0.56479	-0.675118	-0.768734	-0.294822	-0.782694	0.977514	0.177538	-0.679156
1959	0.470112	0.21296	0.34024	0.333962	0.445172	0.27702	0.531806	0.161445	0.258003	0.0960668	0.279109	0.337397	-0.119603
1960	-0.661199	-0.528379	NA	NA	NA	NA	NA	NA	NA	NA	NA	NA	NA
1961	-1.10024	-1.30596	-1.21396	-1.37936	-0.481315	NA	NA	NA	NA	NA	NA	NA	NA
1962	-1.17792	-1.25656	-1.43293	-1.1669	NA	NA	NA	NA	NA	NA	NA	NA	NA
1964	0.976306	0.948372	1.00789	1.1379	1.1522	1.11803	1.5878	1.07286	0.906291	0.82755	0.771018	1.78551	NA
1965	1.58343	0.898739	1.11179	0.810899	0.990653	1.20789	1.30566	1.15774	1.25351	1.00364	1.05574	1.33419	2.2876
1967	1.18118	0.805124	1.11713	0.997605	1.21896	1.5354	1.26499	1.58834	1.47121	1.45286	1.50769	1.45398	2.1226
1968	-1.00689	-1.19868	NA	NA	NA	NA	NA	NA	NA	NA	NA	NA	NA
1969	-1.06901	-1.18337	-1.00159	-0.848323	-0.599191	-1.11803	-1.12745	-0.930339	-0.767992	-0.926911	NA	NA	NA
1973	2.44564	2.26095	2.52841	2.55883	2.45546	2.66262	2.85223	2.77345	2.82236	3.05408	3.11595	2.79012	3.68563
1974	3.19925	2.94138	2.52601	2.77518	2.98943	2.48404	3.14778	2.51527	3.20697	3.13034	3.40822	2.71289	3.57042
1975	-1.29209	-1.13983	-1.29587	-1.18563	-1.10092	NA	NA	NA	NA	NA	NA	NA	NA
1977	0.468355	1.06641	-0.232169	0.658145	0.644067	0.987246	1.22846	1.68081	1.23047	1.25973	1.02012	0.873757	1.32124
1978	-0.491659	-0.593857	-0.34003	0.431268	-0.0703661	0.361314	0.695772	-0.34273	0.512053	0.200152	0.314531	0.0733533	1.11798
1979	-0.755844	-1.13229	-0.566581	-0.783759	-0.513994	-0.774258	-0.686445	-1.08591	-0.49813	-0.806058	-0.813688	-0.62915	0.273409
1981	1.42417	1.06163	1.53772	1.37519	1.5081	1.43072	1.12674	1.48879	1.43878	1.42897	1.69422	1.31586	1.9903
1982	-1.33829	-1.30877	-1.42482	-1.41204	-1.31403	-1.31403	-1.14993	-1.3797	-0.685966	NA	NA	NA	NA
1983	1.78202	1.42137	1.37787	1.44494	1.52399	1.17324	1.39048	1.26942	1.39175	1.37795	1.43781	1.37501	1.57964
1984	2.12087	1.51998	1.85769	1.08343	1.72869	1.82505	1.6512	1.48358	1.47003	2.01375	1.92296	1.48386	2.22888
1990	NA	NA	NA	NA	NA	NA	NA	NA	NA	NA	NA	NA	NA
1991	NA	NA	NA	NA	NA	NA	NA	NA	NA	NA	NA	NA	NA
1992	0.999654	0.854755	1.09891	0.626444	1.39081	1.80159	1.69175	1.95714	1.85359	2.23878	1.32644	2.49289	NA
1993	-0.317714	0.745996	0.117448	-1.01074	0.829732	-0.292676	0.204273	-0.595704	-0.0973631	-0.0326128	0.249017	NA	NA
1994	-0.921277	-1.11874	-0.799077	-0.914193	-1.01712	-0.878874	-0.639014	-0.709607	-1.03367	-0.702947	-1.06419	NA	NA
1995	0.738024	0.0726488	-0.587474	-1.41845	-0.539539	-0.250519	0.358199	0.0700197	1.43171	NA	NA	NA	NA
1996	-1.06461	0.348086	-0.499208	2.19178	-1.15112	1.83908	-0.315729	-1.01918	0.189077	1.37092	NA	NA	NA
1997	NA	NA	NA	NA	NA	NA	NA	NA	NA	NA	NA	NA	NA
1998	-0.390691	0.372484	-0.268934	-0.400271	-0.2008	-0.296055	-0.389036	0.223186	0.119561	-0.269954	-0.270771	-0.253396	-0.107645
1999	-1.75443	-0.929715	0.364187	-0.262232	-0.122796	NA	NA	NA	NA	NA	NA	NA	NA
2000	-1.75685	-1.43841	NA	NA	NA	NA	NA	NA	NA	NA	NA	NA	NA
2001	NA	NA	NA	NA	NA	NA	NA	NA	NA	NA	NA	NA	NA
2002	0.416726	0.361714	1.17455	0.995181	0.946975	1.46174	1.41989	1.71106	0.959456	0.703027	1.12145	1.09986	1.83951
2004	-1.22842	-1.17541	-1.24772	-1.08357	-0.932475	-0.703436	-0.959733	-0.855591	-1.00452	-1.09326	-0.933571	NA	NA
2005	-1.06179	-1.23563	-0.784203	-1.20133	-1.06239	-1.18598	-1.13093	-0.982352	-0.637192	NA	NA	NA	NA
2006	-1.12411	-0.973532	-1.18003	-1.28207	-1.03851	NA	NA	NA	NA	NA	NA	NA	NA
2009	-0.260893	-0.167211	-0.544569	-0.332331	-0.243007	-1.01855	-0.850803	-0.635676	-0.743258	-0.936081	-0.662562	-0.876318	-0.611354
2010	0.332752	0.53689	0.17856	0.133261	0.475591	0.575913	0.422239	0.415705	0.421478	-0.548144	0.506643	0.468769	0.716823
2011	0.497422	0.376186	0.789371	0.31651	0.65565	-0.191473	-0.0731462	-0.161726	-0.0262388	0.268745	-0.00308262	-0.0508541	0.0390258
2012	NA	NA	NA	NA	NA	NA	NA	NA	NA	NA	NA	NA	NA
2013	-1.48098	0.052521	-0.609107	-0.343751	-0.386979	-0.230359	-0.194289	-0.0301091	-0.346518	-0.272917	-0.428744	-0.0587396	-0.279775
2014	-0.0845802	0.288619	0.383458	0.448853	-0.543231	0.974697	0.784816	0.787109	0.531849	-0.394272	0.0577284	0.232885	-0.47229
2015	NA	NA	NA	NA	NA	NA	NA	NA	NA	NA	NA	NA	NA
2016	-0.811992	NA	NA	NA	NA	NA	NA	NA	NA	NA	NA	NA	NA
2017	-1.38896	-1.65484	-1.17799	-1.56595	-1.0374	NA	NA	NA	NA	NA	NA	NA	NA
2018	-1.66675	-1.31932	-1.17338	NA	NA	NA	NA	NA	NA	NA	NA	NA	NA
2019	-1.24362	-1.52669	-1.31238	-1.42962	-1.02764	-0.612092	-1.05088	-1.18756	-0.988537	-1.13768	-0.137469	NA	NA
2020	-0.301792	NA	NA	NA	NA	NA	NA	NA	NA	NA	NA	NA	NA
2021	NA	NA	NA	NA	NA	NA	NA	NA	NA	NA	NA	NA	NA
2022	-1.26183	-1.41195	-1.37363	-1.24224	-1.37615	0.0943472	NA	NA	NA	NA	NA	NA	NA
2023	2.6401	2.33606	2.82475	2.47164	2.41046	3.32113	3.0684	2.53758	3.09247	3.30551	2.99064	2.7184	3.58653
2026	1.01034	0.744052	1.06804	0.590946	0.645767	0.778835	0.575995	0.89266	0.652801	1.11823	0.573341	0.678126	1.56654
2027	1.27522	0.407518	2.39426	2.23398	2.78119	0.143551	0.494834	-0.238854	-0.700264	3.29533	1.35884	1.14239	2.46156
2028	-1.41792	-0.986655	NA	NA	NA	NA	NA	NA	NA	NA	NA	NA	NA
2029	0.334215	1.0417	0.280293	0.187351	0.876749	2.16247	1.13314	1.42678	1.60689	1.41824	1.73786	1.61356	3.45705
2030	NA	NA	NA	NA	NA	NA	NA	NA	NA	NA	NA	NA	NA
2033	0.799402	0.999181	0.611311	1.02124	0.431052	0.149765	0.748259	0.232766	0.350948	0.390098	0.557276	0.686265	NA
2034	0.00935792	-0.443238	0.227936	0.585999	0.25178	-0.115902	0.091779	-0.158712	0.0318356	-0.335255	-0.202316	-0.0535761	-0.247054
2035	-0.690694	-0.822956	-0.741941	-0.705352	-0.468206	-0.236292	-0.426808	-0.267814	-0.572573	-0.955178	-0.652253	-0.573493	-0.671137
2036	NA	NA	NA	NA	NA	NA	NA	NA	NA	NA	NA	NA	NA
2037	NA	NA	NA	NA	NA	NA	NA	NA	NA	NA	NA	NA	NA
2038	-1.36386	-1.6602	-1.51098	-1.63225	-1.44057	-1.29401	-1.38342	NA	NA	NA	NA	NA	NA
2039	-0.526426	-0.330478	-1.79549	-0.676264	-0.975552	-1.04203	-1.14382	-1.01953	NA	NA	NA	NA	NA
2040	-1.13281	-0.344608	-0.68961	-1.08425	-0.476808	-0.534163	0.297646	-0.545324	-0.624949	-0.609917	-0.743598	1.48382	NA
2041	-1.58422	-1.56224	-1.34437	-0.924115	-1.06467	-0.581706	NA	NA	NA	NA	NA	NA	NA
2042	-1.43634	0.467493	-1.28779	-1.05272	NA	NA	NA	NA	NA	NA	NA	NA	NA
2043	0.763293	-1.40741	-1.06263	-0.0836411	-1.27911	-0.181938	NA	NA	NA	NA	NA	NA	NA
2044	NA	NA	NA	NA	NA	NA	NA	NA	NA	NA	NA	NA	NA
2045	-0.0373826	-0.193749	-0.00493924	0.109558	0.291448	-0.0873824	0.44655	-0.395673	0.218275	0.0821499	0.38817	0.504158	-0.127574
2046	0.570092	0.598267	0.834891	0.745817	0.741719	1.25602	1.33207	1.30622	1.19441	1.07669	1.22698	1.08586	0.622833
2047	0.10189	-1.2917	1.1724	1.59944	-0.0356183	0.09562	0.961928	-0.427957	1.01196	-0.0730018	-0.451952	-0.465272	NA
2048	-0.299182	-0.22748	-0.0989735	-0.241398	-0.0365298	-0.0847055	-0.143412	-0.19853	-0.135239	-0.285204	-0.0452338	-0.531114	NA
2049	-1.60049	-1.65769	-1.47178	-1.33934	-0.925564	NA	NA	NA	NA	NA	NA	NA	NA
2050	-1.31743	-1.64129	-1.28161	-0.21916	-1.01712	-0.900437	-0.320565	-0.90387	-0.386053	-0.570207	-0.439739	-0.665685	0.105808
2051	-1.04999	NA	NA	NA	NA	NA	NA	NA	NA	NA	NA	NA	NA
2052	-0.800794	-1.09264	-1.03123	0.54323	-0.186611	-0.824347	-0.123972	-0.958498	0.198138	NA	NA	NA	NA
2053	0.746285	0.369816	0.315874	0.485087	0.721627	0.9429	1.16476	0.851371	1.46594	0.994653	1.38998	0.541851	0.922981
2054	-0.0390111	-0.074591	-0.408499	-0.111184	0.0674894	-0.301976	-0.230286	-0.381266	-0.322939	-0.25307	-0.300947	-0.0655057	-0.0573598
2055	0.00445864	-0.842058	0.120749	-0.565036	-0.203787	0.00261708	-0.370883	-0.378022	-0.0228337	0.00337693	0.14707	-0.35907	0.42097
2056	NA	NA	NA	NA	NA	NA	NA	NA	NA	NA	NA	NA	NA
2057	0.817868	0.0121459	0.146289	0.27477	0.864233	1.17384	0.885032	1.00717	1.028	0.630216	1.34196	1.27611	0.834597
2058	1.9388	1.87501	2.56617	1.6372	2.26286	2.81285	2.79761	2.4801	2.53791	2.33863	2.90794	2.67766	2.14748
2059	NA	NA	NA	NA	NA	NA	NA	NA	NA	NA	NA	NA	NA
2060	0.398502	0.405786	0.224772	0.938642	0.633934	1.01226	0.650245	0.330874	0.839953	0.733753	-0.0393889	0.52774	0.571636
2063	0.753925	0.23676	0.526176	0.686782	0.337636	1.38678	1.02923	0.471258	1.10198	0.831636	0.720927	0.942053	1.63306
2064	NA	NA	NA	NA	NA	NA	NA	NA	NA	NA	NA	NA	NA
2065	NA	NA	NA	NA	NA	NA	NA	NA	NA	NA	NA	NA	NA
2066	-1.17996	0.271151	0.0635119	0.904979	0.595657	-0.737494	-0.283106	NA	NA	NA	NA	NA	NA
2067	-1.60103	-1.33578	-0.934511	-0.00256649	0.0125596	-0.705026	-0.865824	-0.820688	-0.0144915	-0.291997	NA	NA	NA
2068	-1.49514	-1.05736	-1.63036	-0.725445	-0.985992	-1.02424	-0.299366	-0.718837	-0.35509	-0.713881	-0.454127	-0.686285	-0.371708
2069	NA	NA	NA	NA	NA	NA	NA	NA	NA	NA	NA	NA	NA
2070	NA	NA	NA	NA	NA	NA	NA	NA	NA	NA	NA	NA	NA
2071	0.626338	0.765789	0.670664	0.507381	0.43805	0.661388	0.131493	0.381187	0.493213	0.559862	0.281193	0.235164	1.35893
2072	-0.432171	-0.301449	-0.853003	-0.558639	-0.507642	-0.167325	-0.405985	-0.314845	-0.0581306	-0.0264937	-0.50153	-0.0279067	NA
2073	-0.283055	0.382159	-0.270694	-0.360644	-0.233051	-1.03775	-1.15429	-0.684967	-0.677729	-0.761898	-0.936185	-1.03019	NA
2074	-0.964364	-1.39719	NA	NA	NA	NA	NA	NA	NA	NA	NA	NA	NA
2077	0.970837	0.578621	0.717508	1.24998	0.776077	1.16491	1.03156	1.24861	0.9156	0.675226	0.75552	1.29901	1.78378
2078	-1.49447	NA	NA	NA	NA	NA	NA	NA	NA	NA	NA	NA	NA
2079	-0.758563	-1.03746	-0.620358	-0.546629	-0.794347	-0.791744	-0.241942	-0.598136	-0.771448	-0.330941	-1.03734	-0.828393	-0.525652
2081	NA	NA	NA	NA	NA	NA	NA	NA	NA	NA	NA	NA	NA
2086	NA	NA	NA	NA	NA	NA	NA	NA	NA	NA	NA	NA	NA
2091	1.06241	1.10384	0.650793	1.11795	1.00722	1.5034	1.62613	1.41461	1.7115	1.81175	1.80592	1.91149	2.38175
2098	-0.627422	-0.400037	-0.897018	-0.603715	-0.521025	-0.222208	-1.15185	-0.910467	-1.01285	-1.04532	NA	NA	NA
2099	0.446879	1.23368	0.298061	1.69783	0.675262	0.603507	1.284	1.8124	1.53567	1.72971	1.2629	NA	NA
2100	-0.569713	-0.682734	-0.625099	-0.629752	-0.472386	-0.581635	-0.21149	-0.471783	-0.437291	-0.436405	-0.257564	-0.55239	NA
2101	NA	NA	NA	NA	NA	NA	NA	NA	NA	NA	NA	NA	NA
2103	-1.34299	-1.45844	-1.34258	-1.4511	-1.2418	NA	NA	NA	NA	NA	NA	NA	NA
2104	-1.17405	-1.58327	-1.106	NA	NA	NA	NA	NA	NA	NA	NA	NA	NA
2107	0.880005	0.592586	0.0100746	0.570617	0.856601	1.27667	0.788574	1.1328	0.549959	0.740692	0.953621	0.908759	NA
2108	-1.58855	-0.629037	-1.26101	-1.47675	-1.21765	-0.552148	-1.28101	-1.21658	NA	NA	NA	NA	NA
2109	1.96068	1.27829	0.357669	0.623543	1.63082	2.04506	2.0679	1.69134	2.17802	2.02679	2.4406	1.87929	2.52607
2110	0.0681447	0.0637966	-0.41218	-0.422197	0.144106	-0.0187018	-0.231337	0.216844	0.197384	0.130583	0.00814969	0.0538526	-0.369746
2113	-1.52037	-1.68021	NA	NA	NA	NA	NA	NA	NA	NA	NA	NA	NA
2114	0.56271	0.368473	0.293949	0.569412	0.961638	0.191916	0.547176	0.270682	1.09183	0.641039	0.484726	0.592063	1.32232
2115	1.60275	1.35624	1.67654	1.02471	1.46779	2.16577	2.44144	-1.26915	1.21027	2.00886	1.47341	2.08994	1.94277
2116	NA	NA	NA	NA	NA	NA	NA	NA	NA	NA	NA	NA	NA
2117	NA	NA	NA	NA	NA	NA	NA	NA	NA	NA	NA	NA	NA
2118	-1.65986	-0.631408	-1.17304	-1.13242	-0.902404	-0.839082	NA	NA	NA	NA	NA	NA	NA
2119	1.60892	1.27766	1.92594	1.56521	1.86106	1.33277	1.65067	1.08035	1.85266	1.82962	1.63576	1.47398	2.22312
2120	-1.01052	-1.46843	-1.06992	-0.827089	-1.01987	-1.16724	-0.868692	NA	NA	NA	NA	NA	NA
2121	-1.74523	-1.71792	-1.13423	-0.648983	NA	NA	NA	NA	NA	NA	NA	NA	NA
2122	-1.00075	NA	NA	NA	NA	NA	NA	NA	NA	NA	NA	NA	NA
2123	NA	NA	NA	NA	NA	NA	NA	NA	NA	NA	NA	NA	NA
2124	-0.263802	-0.539709	-0.309133	-0.232782	-0.132464	-0.128865	0.227653	0.0354927	0.237232	-0.1156	-0.11995	-0.0316263	-0.0244564
2125	NA	NA	NA	NA	NA	NA	NA	NA	NA	NA	NA	NA	NA
2128	-1.49533	-1.42429	NA	NA	NA	NA	NA	NA	NA	NA	NA	NA	NA
2130	0.169939	-0.181891	-0.0733731	0.239133	0.100967	1.20296	-0.0243977	0.25643	0.453969	0.268074	0.12886	0.325204	1.15368
2131	-0.624351	-0.734246	-0.51662	-0.330505	-1.21616	-0.786695	-0.963662	-0.784692	-0.6024	-0.83026	-1.11282	-0.270362	NA
2132	NA	NA	NA	NA	NA	NA	NA	NA	NA	NA	NA	NA	NA
2134	-0.557316	-0.687926	-0.116053	-0.297341	-0.0691743	-0.451827	0.307366	-0.223541	0.195611	0.126852	-0.00910625	-0.524611	NA
2135	0.828174	0.836546	0.496419	0.781347	0.868265	0.625882	0.460947	0.943995	0.45391	0.663821	0.531173	1.13025	-0.0814535
2137	-1.26459	-1.37405	-1.6211	-1.04615	-0.993371	-1.13456	-0.820641	NA	NA	NA	NA	NA	NA
2138	-1.30121	-1.51117	-0.594436	-1.01735	NA	NA	NA	NA	NA	NA	NA	NA	NA
2139	-1.86035	-1.27216	NA	NA	NA	NA	NA	NA	NA	NA	NA	NA	NA
2140	NA	NA	NA	NA	NA	NA	NA	NA	NA	NA	NA	NA	NA
2145	0.0044776	0.301728	-0.0663652	0.379646	0.0842578	-0.0460747	-0.623491	-0.397867	-0.273122	-0.209051	-0.544672	-0.57229	0.354555
2146	-1.6442	NA	NA	NA	NA	NA	NA	NA	NA	NA	NA	NA	NA
2147	NA	NA	NA	NA	NA	NA	NA	NA	NA	NA	NA	NA	NA
2149	-1.26101	NA	NA	NA	NA	NA	NA	NA	NA	NA	NA	NA	NA
2150	NA	NA	NA	NA	NA	NA	NA	NA	NA	NA	NA	NA	NA
2151	NA	NA	NA	NA	NA	NA	NA	NA	NA	NA	NA	NA	NA
2152	0.339077	-0.448172	-1.0452	-0.434057	-0.213672	-0.176734	0.660464	0.626716	-0.789194	0.446444	-0.508896	NA	NA
2153	NA	NA	NA	NA	NA	NA	NA	NA	NA	NA	NA	NA	NA
2155	-1.60857	-1.2881	NA	NA	NA	NA	NA	NA	NA	NA	NA	NA	NA
2157	0.0578358	-0.972824	-0.167416	-0.206665	-0.209791	0.100643	-0.0944673	-0.0556785	-0.292232	0.245178	-0.299498	1.27062	NA
2158	-0.270873	-0.111291	0.0135743	-0.281814	0.175159	-0.0240847	-0.164954	-0.177864	-0.131519	-0.168559	0.0863262	-0.521728	NA
2159	-1.66192	-0.815111	-0.705189	-0.90828	-1.03082	-1.09905	NA	NA	NA	NA	NA	NA	NA
2160	NA	NA	NA	NA	NA	NA	NA	NA	NA	NA	NA	NA	NA
2161	-0.34025	-0.611612	0.212354	0.212188	0.0325534	1.26183	0.838382	-0.248448	0.043837	0.958319	0.30597	0.59007	1.80916
2162	-1.33675	-1.75443	-1.3023	-0.862529	NA	NA	NA	NA	NA	NA	NA	NA	NA
2165	-1.40359	-1.58148	NA	NA	NA	NA	NA	NA	NA	NA	NA	NA	NA
2166	-0.948892	-0.968367	-0.698115	-1.25036	-0.931016	-1.05325	-0.963716	-0.883859	NA	NA	NA	NA	NA
2167	-1.36137	-0.549729	NA	NA	NA	NA	NA	NA	NA	NA	NA	NA	NA
2168	NA	NA	NA	NA	NA	NA	NA	NA	NA	NA	NA	NA	NA
2169	NA	NA	NA	NA	NA	NA	NA	NA	NA	NA	NA	NA	NA
2170	-1.46713	-0.498522	-1.34315	-1.25169	-0.998901	0.584865	-0.929195	1.44554	-0.603642	-0.931849	-0.110497	-0.299788	NA
2171	0.728882	0.454506	1.3664	0.982568	0.422445	1.50398	1.60169	0.596127	1.52994	1.70122	1.03149	1.02758	1.81139
2172	-0.385793	-0.224828	0.28518	0.241089	0.109354	0.296332	0.532461	0.287153	-0.10412	-0.605692	0.162213	0.342994	-0.288087
2173	-0.844569	NA	NA	NA	NA	NA	NA	NA	NA	NA	NA	NA	NA
2175	-1.48202	NA	NA	NA	NA	NA	NA	NA	NA	NA	NA	NA	NA
2176	0.286426	0.0647389	0.124905	0.329967	0.105196	0.0610173	-0.0262192	-0.398336	0.543283	0.297121	0.869019	0.335516	0.570226
2177	NA	NA	NA	NA	NA	NA	NA	NA	NA	NA	NA	NA	NA
2178	-0.943071	-0.990701	-1.36485	-1.20007	-1.27487	-1.18481	-1.23889	-0.838894	-1.16335	-0.250619	NA	NA	NA
2180	0.806753	0.247705	0.82484	0.825395	0.936329	0.924253	0.787736	0.574848	0.843601	0.491096	0.444099	0.226311	0.529722
2181	0.603219	0.682879	-0.265983	0.146973	0.210215	1.18966	0.194809	0.810446	0.540502	0.636238	0.424725	0.293768	1.66233
2182	-0.891762	-0.528211	-0.285282	-0.453287	0.00595576	0.28025	0.340134	-0.00111521	-0.370542	-0.0723422	0.104736	1.06685	NA
2184	NA	NA	NA	NA	NA	NA	NA	NA	NA	NA	NA	NA	NA
2185	-0.289884	-0.263498	-0.160025	-0.0970668	-0.349654	0.411816	0.331154	0.12891	-0.0822446	0.0144754	-0.131563	-0.0716007	NA
2186	-0.553879	0.00839524	-0.297972	-0.741644	-0.35442	-0.716851	-1.44682	-0.673776	-0.456059	NA	NA	NA	NA
2187	NA	NA	NA	NA	NA	NA	NA	NA	NA	NA	NA	NA	NA
2188	NA	NA	NA	NA	NA	NA	NA	NA	NA	NA	NA	NA	NA
2189	-1.26593	-1.02891	-1.32896	-1.413	-1.28154	-1.52848	-0.915063	-1.15821	-0.863691	NA	NA	NA	NA
2191	-1.38376	-0.202292	-0.836634	-0.0814119	-1.15655	-0.510085	-1.28032	-0.880549	NA	NA	NA	NA	NA
2192	NA	NA	NA	NA	NA	NA	NA	NA	NA	NA	NA	NA	NA
2193	NA	NA	NA	NA	NA	NA	NA	NA	NA	NA	NA	NA	NA
2194	-0.633445	-0.787498	-0.848323	-0.954216	-1.10966	-0.903971	-0.993371	-1.16731	-0.610469	NA	NA	NA	NA
2195	1.43421	-0.563739	-0.404273	-0.595849	-0.485458	0.180962	-0.429865	-0.841774	NA	NA	NA	NA	NA
2196	-1.52848	-1.42864	-1.29818	-1.06648	-0.815939	-0.639736	NA	NA	NA	NA	NA	NA	NA
2197	-1.18941	-0.973042	-1.16926	-1.41256	-1.11023	-0.779151	-0.933571	-0.805375	-0.977794	NA	NA	NA	NA
2199	-1.68843	-1.34543	-1.13989	-0.88728	NA	NA	NA	NA	NA	NA	NA	NA	NA
2200	-1.04644	-0.690132	-0.702255	-0.936081	-1.09122	-0.885692	NA	NA	NA	NA	NA	NA	NA
2201	-1.39152	NA	NA	NA	NA	NA	NA	NA	NA	NA	NA	NA	NA
2202	NA	NA	NA	NA	NA	NA	NA	NA	NA	NA	NA	NA	NA
2203	-1.24801	-1.53345	-1.29386	-0.978507	-0.593133	-0.597737	-0.558953	-0.582456	-0.194501	-0.688607	-0.463793	NA	NA
2204	-1.02309	NA	NA	NA	NA	NA	NA	NA	NA	NA	NA	NA	NA
2205	-0.575229	-0.0698317	-1.26953	NA	NA	NA	NA	NA	NA	NA	NA	NA	NA
2206	-1.40837	NA	NA	NA	NA	NA	NA	NA	NA	NA	NA	NA	NA
2207	NA	NA	NA	NA	NA	NA	NA	NA	NA	NA	NA	NA	NA
2208	-1.32984	-1.4775	-1.50913	-0.988205	-1.20545	-1.18536	-0.787587	-1.02522	-0.951338	-1.16161	-1.00582	-1.06937	NA
2209	-0.782738	-1.1369	-0.794931	-0.414294	-0.884453	-0.297367	-0.53379	-0.387877	-0.49432	NA	NA	NA	NA
2210	NA	NA	NA	NA	NA	NA	NA	NA	NA	NA	NA	NA	NA
2212	NA	NA	NA	NA	NA	NA	NA	NA	NA	NA	NA	NA	NA
2213	NA	NA	NA	NA	NA	NA	NA	NA	NA	NA	NA	NA	NA
2214	NA	NA	NA	NA	NA	NA	NA	NA	NA	NA	NA	NA	NA
2215	NA	NA	NA	NA	NA	NA	NA	NA	NA	NA	NA	NA	NA
2217	NA	NA	NA	NA	NA	NA	NA	NA	NA	NA	NA	NA	NA
2218	-0.239471	-0.468996	-0.422107	-0.446257	-0.126044	-0.631371	-0.180061	-0.154289	-0.218316	-0.351992	0.131576	-0.336652	-0.22546
2219	-1.35205	-0.896716	NA	NA	NA	NA	NA	NA	NA	NA	NA	NA	NA
2220	NA	NA	NA	NA	NA	NA	NA	NA	NA	NA	NA	NA	NA
2222	-0.994541	NA	NA	NA	NA	NA	NA	NA	NA	NA	NA	NA	NA
2224	1.25942	1.048	1.40528	1.08046	1.29498	2.41391	1.83055	2.04847	1.71333	1.69198	1.67532	1.59473	1.90122
2230	NA	NA	NA	NA	NA	NA	NA	NA	NA	NA	NA	NA	NA
2232	0.153664	0.474518	0.686837	0.431064	-0.140768	1.16194	0.148061	0.596488	0.278051	0.321911	0.411046	-0.0527284	1.11365
2235	0.269115	0.325365	-0.385822	0.0301953	0.49489	0.0798799	0.0389345	0.764345	0.251431	0.200751	0.108897	0.37335	0.79015
2237	NA	NA	NA	NA	NA	NA	NA	NA	NA	NA	NA	NA	NA
2239	-1.14572	-0.781851	NA	NA	NA	NA	NA	NA	NA	NA	NA	NA	NA
2241	-0.329199	0.0384592	-0.863352	-0.416084	0.0462151	-1.00961	-1.10086	-0.519521	-1.05527	-0.449533	-0.693792	-0.870056	-0.166321
2242	-1.48192	-1.67287	-1.23527	-1.34421	-1.05629	-0.722156	-0.700873	NA	NA	NA	NA	NA	NA
2243	-0.846943	-0.591435	-1.13846	-0.68381	-1.02119	-0.583565	-0.336954	-0.155799	-0.637647	-0.545289	-0.709033	-0.86282	-0.622632
2244	-1.02758	-1.23361	-1.3676	-1.1725	-0.834191	-0.998509	-0.6024	-0.87622	-0.820503	-0.652446	-0.63405	NA	NA
2245	-1.39943	-1.49898	-0.927844	NA	NA	NA	NA	NA	NA	NA	NA	NA	NA
2246	NA	NA	NA	NA	NA	NA	NA	NA	NA	NA	NA	NA	NA
2247	-1.473	-0.674368	-1.43392	-0.872546	-1.02027	-1.1356	-0.674328	-1.11251	NA	NA	NA	NA	NA
2248	NA	NA	NA	NA	NA	NA	NA	NA	NA	NA	NA	NA	NA
2249	-1.61541	NA	NA	NA	NA	NA	NA	NA	NA	NA	NA	NA	NA
2250	-1.43634	NA	NA	NA	NA	NA	NA	NA	NA	NA	NA	NA	NA
2251	-1.00751	-1.13579	-0.782206	-0.943704	-0.861031	-0.669407	-0.752488	-0.897469	-0.841585	-0.81355	-0.800704	-0.704985	-0.675671
2252	-1.02349	-1.20077	-0.995155	-0.791789	-0.865242	-0.701767	-0.884255	-0.606792	-0.50949	-0.767468	-0.806376	NA	NA
2253	-1.68926	-1.48391	-1.57415	-1.3569	-1.44283	-1.08708	-1.02787	NA	NA	NA	NA	NA	NA
2254	1.35002	-0.286398	0.339143	-0.433327	0.572078	-0.70063	-0.0571571	0.371451	0.0664434	-0.0233613	1.02183	NA	NA
2255	-0.269724	-1.66077	-1.34583	-1.03396	-1.47253	-1.13644	-1.10042	-0.596756	-0.691498	NA	NA	NA	NA
2256	NA	NA	NA	NA	NA	NA	NA	NA	NA	NA	NA	NA	NA
2257	-0.56479	0.941488	1.01387	1.15207	-0.397603	-0.0580697	-0.268221	0.543601	0.697856	-1.14028	1.91451	NA	NA
2258	-0.73017	-0.0298532	-1.41889	-1.0061	1.20529	NA	NA	NA	NA	NA	NA	NA	NA
2259	0.714482	0.260596	0.902235	0.78364	0.693882	0.318012	-0.267152	0.475169	0.610927	NA	NA	NA	NA
2260	0.996364	0.677924	0.719955	0.772451	0.929515	0.775038	1.06646	1.35774	1.14874	0.949781	1.23865	0.855126	0.51597
2261	NA	NA	NA	NA	NA	NA	NA	NA	NA	NA	NA	NA	NA
2262	-0.841443	-1.26645	-0.801292	-0.237474	NA	NA	NA	NA	NA	NA	NA	NA	NA
2263	-1.49456	-1.21163	-0.105678	NA	NA	NA	NA	NA	NA	NA	NA	NA	NA
2264	-1.61683	-1.40298	-1.09463	-1.37346	-1.01958	-1.23462	NA	NA	NA	NA	NA	NA	NA
2266	-1.14022	NA	NA	NA	NA	NA	NA	NA	NA	NA	NA	NA	NA
2267	NA	NA	NA	NA	NA	NA	NA	NA	NA	NA	NA	NA	NA
2268	NA	NA	NA	NA	NA	NA	NA	NA	NA	NA	NA	NA	NA
2271	0.771308	1.18134	0.0802645	0.518281	0.976837	2.10771	0.984426	1.19677	1.4219	1.28572	1.80071	1.32658	1.54279
2272	-1.06497	-0.0562049	-0.29265	-0.460153	-0.904477	-0.526392	-0.311424	-0.126502	-0.794976	-0.732815	-0.101734	-1.23354	0.91916
2273	-1.60146	-1.43832	-1.21446	-1.37296	-1.23332	-1.13729	-0.793	-1.27125	-1.17121	NA	NA	NA	NA
2274	-0.212137	-1.45651	0.55289	-0.48607	-1.09016	1.50672	0.723287	2.26499	0.109964	-0.876957	0.145736	-0.188548	1.42235
2275	-1.39598	NA	NA	NA	NA	NA	NA	NA	NA	NA	NA	NA	NA
2277	-1.58654	0.221057	-1.65883	-1.4858	-0.565808	-0.273532	-0.763548	NA	NA	NA	NA	NA	NA
2280	1.35024	1.27969	1.83593	1.65584	1.73218	1.79473	1.85885	1.6528	1.8054	2.0806	1.83656	2.01054	2.08521
2281	-0.765332	-0.697508	0.0748135	-0.421025	0.307338	0.384238	1.34676	0.0338589	0.870166	0.998649	0.797212	0.402077	0.0884765
2286	2.38602	2.25354	1.94405	1.68507	2.32074	2.00631	2.64218	2.85944	2.54766	2.80146	3.00413	2.84558	1.90165
2287	2.35285	1.7008	2.08276	1.95305	1.99231	2.1649	2.54226	2.26705	2.19592	2.1852	2.09974	2.27614	2.2314
2288	0.399876	0.399443	0.570123	0.584033	0.52515	0.778654	0.706117	0.59356	0.370199	0.417625	0.326089	0.499135	1.45481
2289	0.661808	1.3154	-1.53305	-1.4332	-1.1941	0.380253	-0.362333	0.54048	-0.574343	-0.579316	NA	NA	NA
2290	-0.492275	-0.95395	-0.649098	-0.789418	-1.05159	-0.309559	-0.830727	-1.08517	-0.0976807	NA	NA	NA	NA
2294	-0.279028	-0.969126	-1.68549	-1.19473	NA	NA	NA	NA	NA	NA	NA	NA	NA
2295	-1.56492	-1.51586	-1.05933	-1.21914	NA	NA	NA	NA	NA	NA	NA	NA	NA
2296	-0.685366	-0.850756	-0.393951	-1.15304	-0.442469	NA	NA	NA	NA	NA	NA	NA	NA
2297	-1.22591	-1.326	-1.03239	-0.976973	-0.919681	-1.01707	-0.797542	-1.3707	-0.676541	-1.09419	-0.840782	NA	NA
2298	NA	NA	NA	NA	NA	NA	NA	NA	NA	NA	NA	NA	NA
2299	NA	NA	NA	NA	NA	NA	NA	NA	NA	NA	NA	NA	NA
2300	-1.40064	-1.2576	-0.939175	-1.04739	-1.07611	-0.980317	-0.816261	-1.05849	-0.827229	-0.591508	NA	NA	NA
2301	-0.920195	-0.56936	-0.868254	-0.873475	-0.623043	-1.01575	-1.25663	-1.06029	-0.873573	NA	NA	NA	NA
2302	NA	NA	NA	NA	NA	NA	NA	NA	NA	NA	NA	NA	NA
2303	-1.15855	0.266475	-0.529661	0.227191	0.185278	-0.522799	-0.50949	-0.546561	-0.617087	-0.39363	NA	NA	NA
2304	-0.0547884	-0.033067	0.175506	0.159923	0.267746	0.165072	0.201931	0.244447	-0.200753	0.168749	0.204487	-0.185167	NA
2305	-1.35996	-1.24684	-1.15775	-1.32488	-0.849467	-1.10443	-1.14225	-0.983564	-1.06167	-1.0824	-1.12687	-0.717968	NA
2306	0.084884	-0.157785	-0.17055	0.126586	0.106488	0.248944	0.310001	-0.0629728	0.0952246	-0.0303848	0.0820279	0.114488	-0.190325
2307	-1.01455	-1.63916	-1.1767	-1.05885	-1.25567	NA	NA	NA	NA	NA	NA	NA	NA
2308	-0.710427	0.54538	-0.939648	-0.616679	-0.658324	-0.994262	-0.507148	-0.712111	-0.831054	-0.34996	-0.818425	-0.650598	NA
2309	0.163684	1.12961	0.286635	0.656148	0.453116	-0.272431	0.366024	1.20051	0.65909	0.136473	0.221342	-0.0660581	0.764145
2310	NA	NA	NA	NA	NA	NA	NA	NA	NA	NA	NA	NA	NA
2312	NA	NA	NA	NA	NA	NA	NA	NA	NA	NA	NA	NA	NA
2313	-1.30051	-1.21368	-0.407611	NA	NA	NA	NA	NA	NA	NA	NA	NA	NA
2314	0.338932	0.173865	0.125821	0.290153	0.12597	-0.104845	-0.169405	0.34356	-0.321401	0.308227	-0.17708	-0.270107	0.476674
2315	-1.73625	NA	NA	NA	NA	NA	NA	NA	NA	NA	NA	NA	NA
2316	-0.0480598	-0.435307	0.812779	0.769217	-0.51702	0.0402127	-0.550627	-0.435337	-0.943915	-0.895814	-0.586899	0.31071	NA
2317	0.940135	0.832738	0.81051	0.803869	0.844413	0.198323	NA	NA	NA	NA	NA	NA	NA
2318	NA	NA	NA	NA	NA	NA	NA	NA	NA	NA	NA	NA	NA
2319	-0.685047	-0.515256	-0.918704	-0.219474	-0.774346	-0.693994	-0.693349	-0.384032	-0.650559	-0.67987	-0.822168	0.475214	NA
2321	-1.09301	-1.00435	NA	NA	NA	NA	NA	NA	NA	NA	NA	NA	NA
2322	-1.47337	-1.3374	-1.7217	-0.997166	-0.549143	-1.04727	-0.999406	0.571924	NA	NA	NA	NA	NA
2323	-0.807697	NA	NA	NA	NA	NA	NA	NA	NA	NA	NA	NA	NA
2324	-0.301686	-0.155235	0.137624	-0.0482605	-0.0155762	0.0981776	0.169289	-0.156566	-0.291814	-0.173556	-0.0941086	-0.0833283	-0.104802
2326	0.400557	-0.538209	NA	NA	NA	NA	NA	NA	NA	NA	NA	NA	NA
2327	-1.12964	-0.993482	-0.130575	-0.662952	-0.961076	-0.432414	-0.828626	-0.659877	NA	NA	NA	NA	NA
2328	-1.24992	-1.7009	-1.2961	NA	NA	NA	NA	NA	NA	NA	NA	NA	NA
2329	-1.55506	-0.35966	-1.04444	-0.21456	-0.80902	0.940729	-0.484493	0.399319	0.222976	0.220816	-0.339095	-0.460121	NA
2330	-1.5451	0.133046	-0.202245	NA	NA	NA	NA	NA	NA	NA	NA	NA	NA
2331	-1.21495	-1.24187	-1.02332	-0.669015	-1.20966	-0.667838	-0.217616	-0.905135	-0.744961	-0.581135	NA	NA	NA
2332	-1.64578	-0.42328	-1.28626	-1.15721	-1.27638	-0.644883	-0.876073	-0.648139	-0.602253	-0.854056	-0.237942	NA	NA
2334	-0.412596	-0.567389	-0.790938	-0.725612	-0.474801	-0.864999	-0.554642	-0.880697	-0.582492	-0.719292	-0.464863	-0.807378	-0.823048
2335	1.15688	0.0756394	3.16039	1.71048	1.08686	2.23282	2.2444	2.81501	1.1496	0.968348	2.03864	1.62888	1.89892
2339	0.828268	0.68904	0.659146	0.914407	0.720323	1.072	0.932785	0.789996	1.13529	0.959632	1.1283	0.788753	0.921502
2342	-0.740117	-0.870105	-1.08253	-0.519321	-0.543677	-0.220514	-0.5615	-0.289962	-0.187078	-0.24375	-0.317097	-0.834144	NA
2346	NA	NA	NA	NA	NA	NA	NA	NA	NA	NA	NA	NA	NA
2348	-1.36702	-1.3707	-1.16389	-0.176526	-1.08634	-0.537425	-0.816721	-0.67991	-1.05153	-0.77571	NA	NA	NA
2350	-1.33393	-1.71016	-1.62341	-0.155416	-0.658751	-0.760727	-1.00723	-0.941542	-0.727742	NA	NA	NA	NA
2352	NA	NA	NA	NA	NA	NA	NA	NA	NA	NA	NA	NA	NA
2353	0.26746	-0.106789	0.952804	1.79788	0.623931	-0.350683	-0.12173	-0.866844	0.563727	0.330994	0.569309	1.44773	0.47648
2354	-1.26056	-0.914653	-1.41274	-1.23628	-0.934354	-1.37683	-0.935139	-1.04009	-1.17534	NA	NA	NA	NA
2355	-0.834848	-0.811122	-0.514226	-0.424997	-1.04403	-0.512568	-0.317123	-0.829186	0.0622298	-0.114478	-0.434636	-0.547558	NA
2356	0.344493	0.407002	0.758852	1.00206	0.719482	1.07392	0.853906	0.953008	0.864271	0.534453	1.11309	1.21423	0.839075
2357	-1.44419	NA	NA	NA	NA	NA	NA	NA	NA	NA	NA	NA	NA
2358	NA	NA	NA	NA	NA	NA	NA	NA	NA	NA	NA	NA	NA
2359	NA	NA	NA	NA	NA	NA	NA	NA	NA	NA	NA	NA	NA
2395	NA	NA	NA	NA	NA	NA	NA	NA	NA	NA	NA	NA	NA
2444	-1.35517	-1.10086	-0.499829	NA	NA	NA	NA	NA	NA	NA	NA	NA	NA
2475	0.0469581	0.536826	-0.458056	-0.0888915	-0.0607927	-0.696214	-0.64263	-0.464391	-0.301765	-0.52059	-0.98948	-0.119494	NA
2483	NA	NA	NA	NA	NA	NA	NA	NA	NA	NA	NA	NA	NA
2487	-0.690493	-1.05921	0.847739	0.697694	-0.98743	0.295335	0.515052	-0.651444	-0.180084	-0.781541	-0.212496	0.303501	-0.223177
2488	-0.148052	-0.97659	NA	NA	NA	NA	NA	NA	NA	NA	NA	NA	NA
2491	-1.24684	NA	NA	NA	NA	NA	NA	NA	NA	NA	NA	NA	NA
2492	-0.333533	-0.089668	0.327133	0.192226	0.413854	-0.311051	0.175317	0.0557566	0.305243	-0.105229	0.353072	0.994087	NA
2494	NA	NA	NA	NA	NA	NA	NA	NA	NA	NA	NA	NA	NA
2495	0.639664	0.499335	1.08253	1.36903	1.29441	1.56342	1.7487	2.03947	1.65535	0.978442	1.31788	1.06153	2.46843
2498	NA	NA	NA	NA	NA	NA	NA	NA	NA	NA	NA	NA	NA
2509	NA	NA	NA	NA	NA	NA	NA	NA	NA	NA	NA	NA	NA
2512	NA	NA	NA	NA	NA	NA	NA	NA	NA	NA	NA	NA	NA
2515	NA	NA	NA	NA	NA	NA	NA	NA	NA	NA	NA	NA	NA
2516	NA	NA	NA	NA	NA	NA	NA	NA	NA	NA	NA	NA	NA
2517	-0.887827	-0.282667	-1.14815	-0.996998	-0.353582	-0.212664	-0.436588	0.160468	-0.211155	-0.654067	-0.713263	-0.628061	-0.398834
2519	-1.62022	0.372433	0.366486	-0.158282	-1.43365	-0.0977019	0.239118	0.429028	-0.150941	-0.528784	-0.789865	0.85112	NA
2520	NA	NA	NA	NA	NA	NA	NA	NA	NA	NA	NA	NA	NA
2521	-0.679513	0.0827079	0.0133114	-0.443915	-0.196737	0.466226	-0.710961	-0.716314	-0.83227	-0.766901	-1.01981	NA	NA
2523	-1.34234	-0.147672	0.784514	-0.500123	0.588567	0.312521	0.163109	-0.442254	-0.219378	-0.433814	0.734409	NA	NA
2524	-0.665959	0.0812426	-0.536065	-0.420485	-0.234572	0.113258	-0.341269	0.0774992	0.0095277	0.410496	0.0159564	0.0236978	NA
2525	NA	NA	NA	NA	NA	NA	NA	NA	NA	NA	NA	NA	NA
2526	NA	NA	NA	NA	NA	NA	NA	NA	NA	NA	NA	NA	NA
2527	NA	NA	NA	NA	NA	NA	NA	NA	NA	NA	NA	NA	NA
2528	-1.52491	NA	NA	NA	NA	NA	NA	NA	NA	NA	NA	NA	NA
2529	-0.925305	-1.0752	-1.11689	-0.808929	-0.811671	-0.728369	-0.637533	-0.725236	-1.01376	-0.440689	NA	NA	NA
2530	0.39495	0.669397	0.975602	1.08428	0.868519	-0.119603	0.706526	1.03809	-0.225192	-0.102905	-0.051418	0.504689	0.161685
2531	0.0929864	0.0839446	-0.493281	-0.00222256	0.0467588	0.211111	0.360656	0.973932	0.308486	0.527686	0.42946	0.757515	NA
2532	-1.09283	-0.631069	-0.903162	-0.963878	-1.18468	-1.16275	NA	NA	NA	NA	NA	NA	NA
2533	-1.28948	-1.12398	-1.15191	-1.43159	-1.02349	-1.09718	NA	NA	NA	NA	NA	NA	NA
2534	1.70842	2.23582	2.42695	2.31274	2	2.28058	2.44878	2.24581	2.33861	2.1855	2.59552	2.06342	2.82986
2535	-1.2357	-1.59237	-0.804784	-0.735257	0.0911748	0.047103	-0.520757	-0.401652	-0.501989	NA	NA	NA	NA
2537	1.64921	1.82968	-0.150672	0.405527	0.674159	1.56221	1.58947	1.4516	1.82045	1.38092	1.30964	0.828112	0.783451
2538	NA	NA	NA	NA	NA	NA	NA	NA	NA	NA	NA	NA	NA
2539	NA	NA	NA	NA	NA	NA	NA	NA	NA	NA	NA	NA	NA
2542	-0.843383	-0.539607	-0.844237	-0.929403	-0.754036	-0.926496	-0.53855	-0.816721	-0.656386	-0.556482	-0.481956	NA	NA
2543	NA	NA	NA	NA	NA	NA	NA	NA	NA	NA	NA	NA	NA
2547	2.23594	2.11643	1.51622	1.92196	2.14439	2.32405	2.04616	2.24871	2.43668	2.29835	2.15752	2.06161	2.72976
2548	2.59686	1.35179	1.42638	0.946817	0.0808759	1.64687	0.827059	0.518227	1.30773	1.73603	1.31395	0.661248	2.07864
2549	NA	NA	NA	NA	NA	NA	NA	NA	NA	NA	NA	NA	NA
2550	-0.0926752	0.680506	-1.54733	0.6011	-0.680228	-1.14159	-0.519421	-0.545152	0.0369222	-0.174246	-0.391185	NA	NA
2551	-1.40289	-1.13151	-1.04191	-1.16041	-0.77044	-0.865581	-0.470167	-0.817596	-0.653295	-0.576329	-0.475278	-0.728118	-0.635979
2553	-0.856456	-0.976372	-0.830633	-0.737156	-0.934511	-0.711741	-0.469439	-0.695164	-0.557664	-0.702744	-0.704251	-0.740371	-0.595885
2554	0.166331	-0.711741	-1.13151	-0.994541	NA	NA	NA	NA	NA	NA	NA	NA	NA
2555	NA	NA	NA	NA	NA	NA	NA	NA	NA	NA	NA	NA	NA
2556	-1.39092	-1.36969	-0.883612	-1.23051	-0.9417	-1.11714	-1.05903	-0.968801	-1.13579	-0.908941	-0.85862	NA	NA
2557	-1.60318	-0.806558	-1.20524	-1.08314	-0.884701	NA	NA	NA	NA	NA	NA	NA	NA
2558	-1.00379	NA	NA	NA	NA	NA	NA	NA	NA	NA	NA	NA	NA
2559	NA	NA	NA	NA	NA	NA	NA	NA	NA	NA	NA	NA	NA
2560	-0.392378	0.0259243	-0.210676	-0.0170698	0.288131	0.641554	1.06477	1.25218	0.384339	1.06119	0.644533	0.171445	0.69262
2561	-0.0640546	-1.18653	-0.0321589	-1.68138	-1.25206	-0.619428	-1.1844	NA	NA	NA	NA	NA	NA
2562	-0.30892	0.0738638	-0.961238	-0.237006	-0.658712	-0.511144	-0.620879	-0.797137	-0.55118	0.393593	-0.577039	-0.317097	-0.671727
2563	-1.3959	-1.01878	-0.99482	-0.353275	-1.18577	-0.769215	1.08147	NA	NA	NA	NA	NA	NA
2564	-0.733909	-0.884751	-0.120015	-0.191028	-0.0323759	-0.459307	0.763092	-0.492632	0.140658	0.190195	0.254694	-0.01084	-0.519822
2565	0.797784	0.62627	0.444441	0.792381	0.792454	-0.0148788	0.584956	0.412243	0.0159377	0.129407	-0.0477988	0.121485	NA
2566	-0.314577	0.76141	0.202406	0.212809	0.394042	0.0147192	0.434778	0.933405	0.74825	1.33375	1.06882	0.45952	NA
2567	-1.30276	-1.07666	-1.02383	-0.720744	-0.506291	-1.15013	NA	NA	NA	NA	NA	NA	NA
2568	NA	NA	NA	NA	NA	NA	NA	NA	NA	NA	NA	NA	NA
2569	-1.37204	-1.44582	-1.27827	-1.13417	-0.89341	-0.612055	-0.600794	-1.02148	-0.856311	NA	NA	NA	NA
2570	NA	NA	NA	NA	NA	NA	NA	NA	NA	NA	NA	NA	NA
2571	-1.4688	-1.56544	2.45854	-0.816399	-0.606682	NA	NA	NA	NA	NA	NA	NA	NA
2572	-0.775974	NA	NA	NA	NA	NA	NA	NA	NA	NA	NA	NA	NA
2575	NA	NA	NA	NA	NA	NA	NA	NA	NA	NA	NA	NA	NA
2579	NA	NA	NA	NA	NA	NA	NA	NA	NA	NA	NA	NA	NA
2580	0.0974745	0.506202	0.603418	0.567142	0.50262	0.436802	0.283862	0.669582	0.0783051	0.122721	-0.213864	0.346488	0.348845
2581	0.796898	0.969373	0.0971314	0.634232	1.09459	0.826427	1.40344	1.88512	1.30378	0.726563	1.29924	1.32109	1.51049
2582	-0.661199	-0.890914	-0.89762	-0.868157	-0.748417	-0.541896	-0.81433	-1.138	-0.366995	-0.371196	-0.760987	-0.457119	-0.816767
2583	NA	NA	NA	NA	NA	NA	NA	NA	NA	NA	NA	NA	NA
2584	-1.2352	-1.55516	-1.37927	-0.400829	-0.527166	-0.477669	-0.842436	-0.638178	-0.983784	0.489547	NA	NA	NA
2585	0.757894	0.104617	-0.42557	0.561225	-0.449378	0.0203667	-0.0945517	-0.0383355	0.0637432	0.429124	0.326785	0.0307117	0.708674
2587	-0.972606	-1.4323	-1.23173	-1.51195	-1.32824	-0.974678	NA	NA	NA	NA	NA	NA	NA
2588	-1.42128	-1.06473	-1.63726	-1.45056	-1.35484	NA	NA	NA	NA	NA	NA	NA	NA
2589	-0.876662	-0.154942	-1.40837	-1.02724	-0.841916	-0.999967	-0.746367	-0.603715	-0.897771	-0.888274	-0.952456	NA	NA
2590	-1.49696	-0.913784	-1.46351	-1.46936	-1.30315	-1.11829	-1.5038	-1.0507	NA	NA	NA	NA	NA
2591	-1.14559	-1.42766	-1.27231	-1.13729	-0.643126	-1.40968	-0.792193	-0.258849	-0.80533	NA	NA	NA	NA
2592	0.0216336	-0.0209604	0.249672	-0.0152274	-0.0638299	-0.405926	0.272458	0.448231	-0.182332	0.04607	0.0724373	-0.00451783	-0.550178
2593	0.811772	-0.454252	0.873742	0.211308	0.599396	0.433526	1.30692	1.1374	0.292157	0.623727	0.631595	0.982106	0.685356
2595	NA	NA	NA	NA	NA	NA	NA	NA	NA	NA	NA	NA	NA
2596	-1.35847	-1.22965	-1.30869	-1.59418	-1.27118	-0.992981	-1.15046	-1.07599	-1.27789	NA	NA	NA	NA
2597	4.11938	3.23406	4.69568	3.51083	3.91424	4.26478	4.01471	3.86972	4.00978	4.33874	4.02941	3.94214	4.4148
2615	-1.04033	0.194701	-0.539948	-1.20713	-0.827042	-0.688848	-1.12199	-0.590858	-0.655032	NA	NA	NA	NA
2617	2.24395	2.07178	2.17049	2.40735	2.41981	2.07391	2.36753	2.1037	2.53435	2.29526	2.66118	2.66776	2.55946
2618	-1.4274	-1.47618	-1.04456	NA	NA	NA	NA	NA	NA	NA	NA	NA	NA
2619	NA	NA	NA	NA	NA	NA	NA	NA	NA	NA	NA	NA	NA
2620	-1.25656	-1.19383	-1.383	-1.12546	-0.825554	-1.02194	-0.251469	-0.754638	0.609626	NA	NA	NA	NA
2621	0.66774	0.595466	-0.475183	1.07511	-0.0339957	1.58422	0.729376	1.1868	1.94889	0.0162748	0.571646	0.173675	0.798702
2622	1.48677	1.08288	0.0673122	0.891387	0.831581	0.948482	0.826005	0.688796	0.429807	0.962232	0.868541	0.717613	-0.0297351
2623	-0.0798525	-0.136828	-0.0510152	0.185762	-0.0234199	-0.0520427	-0.0793541	0.228592	-0.124298	-0.171283	0.228949	0.0697722	-0.56164
2624	-0.747136	-0.537255	-0.182309	-0.394797	-0.34494	-0.0814535	-0.213	-0.54804	-0.369718	-0.489781	-0.469913	-0.600685	-0.436894
2625	NA	NA	NA	NA	NA	NA	NA	NA	NA	NA	NA	NA	NA
2626	-1.37095	NA	NA	NA	NA	NA	NA	NA	NA	NA	NA	NA	NA
2627	NA	NA	NA	NA	NA	NA	NA	NA	NA	NA	NA	NA	NA
2628	-1.2525	-1.03001	-1.81422	-0.921947	-1.04975	-1.14035	NA	NA	NA	NA	NA	NA	NA
2629	0.400495	0.438311	-0.0107436	-0.413817	0.251794	0.0445274	0.125238	0.103476	0.574243	0.700803	0.140003	0.350347	NA
2630	NA	NA	NA	NA	NA	NA	NA	NA	NA	NA	NA	NA	NA
2631	-0.043135	-0.114456	-0.538516	-0.103651	-0.276045	0.0154317	-0.0157507	-0.220973	-0.033719	-0.000981657	0.0616951	0.285824	NA
2632	-1.61411	-1.64129	-1.50351	NA	NA	NA	NA	NA	NA	NA	NA	NA	NA
2633	-1.40125	-1.30471	-1.38631	-0.578533	-0.769084	-0.871471	NA	NA	NA	NA	NA	NA	NA
2634	-0.0741367	-0.309186	9.86735e-06	-0.131124	0.152857	-0.196384	-0.243701	-0.645151	-0.190185	-0.144147	-0.255603	-0.479874	NA
2635	-1.08874	-0.953469	-0.841585	-1.16188	-1.21538	-0.873622	NA	NA	NA	NA	NA	NA	NA
2636	NA	NA	NA	NA	NA	NA	NA	NA	NA	NA	NA	NA	NA
2637	NA	NA	NA	NA	NA	NA	NA	NA	NA	NA	NA	NA	NA
2638	NA	NA	NA	NA	NA	NA	NA	NA	NA	NA	NA	NA	NA
2639	-0.503497	-0.0909076	0.216437	0.138494	-0.328764	0.0750772	0.435588	0.479687	0.370761	0.411058	0.0146254	0.0114685	1.11693
2641	NA	NA	NA	NA	NA	NA	NA	NA	NA	NA	NA	NA	NA
2642	NA	NA	NA	NA	NA	NA	NA	NA	NA	NA	NA	NA	NA
2643	0.340372	-1.37666	-0.0487425	-0.473688	-0.291892	-0.881734	-0.525081	0.810931	-0.658596	-0.918755	-0.435002	-0.301343	-0.366287
2644	NA	NA	NA	NA	NA	NA	NA	NA	NA	NA	NA	NA	NA
2645	-1.30121	-1.24618	-0.288946	-0.1802	0.518848	-0.444561	0.258479	0.125804	-0.38357	NA	NA	NA	NA
2646	-1.07879	-1.23447	-0.846943	-1.18139	-1.01467	-1.15974	-0.824347	-1.49696	-1.22857	-0.940805	-1.26094	NA	NA
2647	0.502299	0.0610351	0.637885	0.332326	0.676704	1.20174	1.1537	1.27742	0.648534	0.80169	0.811304	0.77946	0.647057
2648	0.5745	0.877895	1.14766	1.19634	0.127865	0.374547	-0.010493	0.899757	0.474004	0.619324	-0.0166816	-0.127289	0.820921
2649	NA	NA	NA	NA	NA	NA	NA	NA	NA	NA	NA	NA	NA
2650	-1.59738	-1.02914	-1.15735	-1.36752	-1.41213	-0.954857	NA	NA	NA	NA	NA	NA	NA
2651	-0.244221	-1.5452	-1.4985	-0.778091	-0.571583	-0.955285	-0.658634	-0.638216	-0.517519	NA	NA	NA	NA
2652	NA	NA	NA	NA	NA	NA	NA	NA	NA	NA	NA	NA	NA
2653	0.711207	0.513072	0.361778	1.0131	0.457732	0.686183	0.775112	1.04147	0.558914	1.08551	1.11131	0.509748	1.02842
2657	NA	NA	NA	NA	NA	NA	NA	NA	NA	NA	NA	NA	NA
2658	NA	NA	NA	NA	NA	NA	NA	NA	NA	NA	NA	NA	NA
2660	-0.516554	-1.5142	-1.27774	-0.0397469	NA	NA	NA	NA	NA	NA	NA	NA	NA
2661	NA	NA	NA	NA	NA	NA	NA	NA	NA	NA	NA	NA	NA
2662	0.0963588	NA	NA	NA	NA	NA	NA	NA	NA	NA	NA	NA	NA
2664	0.308076	0.977799	-0.298919	0.35715	0.170938	0.0102065	-0.138375	-0.244197	-0.395527	-0.320727	-0.3453	0.750473	NA
2665	1.81927	1.82534	1.42172	1.94337	2.00414	1.95189	2.28404	1.65687	2.17737	2.0795	2.48832	2.00754	2.67895
2668	-1.47722	0.882764	NA	NA	NA	NA	NA	NA	NA	NA	NA	NA	NA
2669	0.369586	-0.388456	0.596958	0.726893	1.07402	0.482612	1.773	-0.0591458	1.05438	-0.693389	0.999777	0.761871	0.947941
2670	NA	NA	NA	NA	NA	NA	NA	NA	NA	NA	NA	NA	NA
2671	0.334613	-0.0358362	-0.225071	-0.483208	0.046342	0.366537	0.378734	0.690316	0.368985	0.383848	0.716075	0.386074	0.347169
2672	NA	NA	NA	NA	NA	NA	NA	NA	NA	NA	NA	NA	NA
2673	0.684319	0.812026	0.733322	0.0479177	1.22926	0.399802	0.717763	0.363041	0.974517	0.626997	0.596558	0.528839	0.743608
2674	-0.997278	-1.34787	-0.738424	-1.06666	NA	NA	NA	NA	NA	NA	NA	NA	NA
2675	-0.149014	-0.183842	0.140527	0.0194154	0.113545	0.273778	0.152436	-0.183214	-0.100204	0.00642903	0.539874	-0.726697	NA
2676	-1.24341	-1.31798	-1.127	-1.1181	-1.19321	-0.599155	-0.766595	-0.492924	-0.944708	-0.916036	NA	NA	NA
2677	0.261904	0.0585338	-0.154469	-0.371822	-0.183191	-0.355762	-0.15774	0.234159	0.0553797	-0.219619	-0.271486	0.658706	NA
2678	NA	NA	NA	NA	NA	NA	NA	NA	NA	NA	NA	NA	NA
2679	NA	NA	NA	NA	NA	NA	NA	NA	NA	NA	NA	NA	NA
2681	-1.06889	-1.28435	-1.19355	-0.975388	-1.24319	-0.420485	-0.27993	-0.367845	-0.100056	-0.740075	-0.672357	-0.542923	-0.588409
2683	NA	NA	NA	NA	NA	NA	NA	NA	NA	NA	NA	NA	NA
2686	-0.0390111	0.250036	-0.37299	-0.44029	-0.26639	-0.4008	-0.346185	0.0138372	-0.0887657	0.0238464	-0.0275533	-0.539266	NA
2687	-0.52069	-1.57928	-0.0623407	0.577294	-1.47048	-0.107924	-0.332904	-1.22206	0.0351442	-1.18893	-0.625137	-0.473148	-0.33668
2688	NA	NA	NA	NA	NA	NA	NA	NA	NA	NA	NA	NA	NA
2689	NA	NA	NA	NA	NA	NA	NA	NA	NA	NA	NA	NA	NA
2690	-0.456901	-0.176457	0.391647	-1.04993	-1.16081	-1.32218	-0.443546	-0.299261	0.517061	NA	NA	NA	NA
2691	NA	NA	NA	NA	NA	NA	NA	NA	NA	NA	NA	NA	NA
2692	0.78498	2.61453	0.636957	0.570988	0.851607	1.51439	1.36061	2.47507	1.68886	1.79753	1.49556	1.74005	NA
2693	0.477436	-0.319488	0.394129	-0.436008	-0.851233	NA	NA	NA	NA	NA	NA	NA	NA
2694	-1.3743	-1.26451	-1.23397	-1.19314	-1.17426	-0.852381	-0.529594	-0.795021	-0.740753	-0.8703	-0.979275	-0.538379	NA
2695	NA	NA	NA	NA	NA	NA	NA	NA	NA	NA	NA	NA	NA
2696	-1.53515	-1.19334	-1.42731	-0.241299	-0.59741	-0.514758	-1.25044	NA	NA	NA	NA	NA	NA
2697	-0.868449	-1.08554	NA	NA	NA	NA	NA	NA	NA	NA	NA	NA	NA
2700	NA	NA	NA	NA	NA	NA	NA	NA	NA	NA	NA	NA	NA
2701	-0.636206	-0.669093	-0.350822	-0.646107	-0.556864	-0.307086	0.24957	-0.23708	-0.00505421	-0.288868	-0.155912	0.0897401	-0.515888
2702	-1.13931	-1.33982	-1.03548	-1.19251	-1.35575	-1.30721	-1.11238	NA	NA	NA	NA	NA	NA
2703	-1.41757	-1.26795	-1.50689	-1.59803	-1.43769	-1.2807	-1.09599	-1.03419	NA	NA	NA	NA	NA
2705	NA	NA	NA	NA	NA	NA	NA	NA	NA	NA	NA	NA	NA
2706	-1.26631	-1.35	-1.08492	-1.31419	NA	NA	NA	NA	NA	NA	NA	NA	NA
2707	-1.25649	-1.50563	-1.17792	-1.23911	-1.45595	-1.14782	-1.23809	-1.07392	-0.873378	NA	NA	NA	NA
2709	-1.45065	-1.31057	-1.16068	-0.842768	NA	NA	NA	NA	NA	NA	NA	NA	NA
2710	-0.79058	-1.03612	-1.08517	-0.68154	0.129904	-1.34828	-1.01884	-0.770134	-0.201131	-0.633559	0.933419	NA	NA
2712	NA	NA	NA	NA	NA	NA	NA	NA	NA	NA	NA	NA	NA
2713	NA	NA	NA	NA	NA	NA	NA	NA	NA	NA	NA	NA	NA
2717	0.474084	0.614772	0.162165	0.242923	0.422626	0.725605	0.302855	1.31972	0.374267	0.325968	0.269913	0.769823	0.977308
2719	-1.40056	-1.59248	-1.40116	-1.46333	-1.1769	-0.870349	-1.23722	-1.02562	-1.04226	NA	NA	NA	NA
2720	-0.197586	-0.255126	-0.439892	-0.171994	-0.346185	-0.151345	-0.628098	0.0672767	-0.154199	-0.568515	-0.385273	0.418426	NA
2729	-1.1901	-1.05808	-0.624575	-0.4574	-0.963932	-0.644463	-0.326891	-0.429501	-0.61235	-0.685366	-1.08973	-0.324345	NA
2730	-0.503793	-0.0842045	-0.567424	-0.383859	0.199338	0.0835441	0.231876	-0.343199	0.209957	0.0794603	0.192598	0.146582	-0.0448737
2731	-1.11251	NA	NA	NA	NA	NA	NA	NA	NA	NA	NA	NA	NA
2733	-0.74445	-0.760727	-0.772062	-0.851329	-0.685446	-0.804103	-1.10494	-0.967879	NA	NA	NA	NA	NA
2734	0.328658	0.171287	0.387931	0.624922	0.60119	0.01224	0.651434	0.74136	0.594985	0.381604	0.770396	0.52012	0.88236
2735	1.39611	0.446597	2.59847	1.96454	2.99262	2.16306	3.84351	2.32045	3.26675	3.3317	3.40371	3.0577	2.14709
2736	-1.17928	-0.960539	-1.03635	-1.23368	-0.763852	-0.942438	-1.01524	NA	NA	NA	NA	NA	NA
2737	-1.48192	-1.1669	-0.132926	-0.703395	NA	NA	NA	NA	NA	NA	NA	NA	NA
2738	NA	NA	NA	NA	NA	NA	NA	NA	NA	NA	NA	NA	NA
2739	0.258811	0.123288	0.66774	0.68846	0.580405	0.859725	1.35747	1.07599	0.982996	0.109016	0.445231	0.376643	1.91445
2740	-0.438912	-0.453505	-0.0824529	-0.283857	-0.20234	0.174402	0.593249	0.219013	0.0399024	0.0308776	-0.0281817	0.254187	-0.696457
2741	-1.71403	NA	NA	NA	NA	NA	NA	NA	NA	NA	NA	NA	NA
2742	-1.5038	NA	NA	NA	NA	NA	NA	NA	NA	NA	NA	NA	NA
2743	-0.129961	0.260668	-0.903769	-1.10789	-0.315649	-0.101182	-1.15968	-0.261726	-0.0147626	-0.232904	NA	NA	NA
2744	NA	NA	NA	NA	NA	NA	NA	NA	NA	NA	NA	NA	NA
2745	-0.292807	-0.374103	-0.124495	-0.180593	0.0517103	1.16375	0.775145	0.827667	0.520098	0.370787	0.733166	0.485821	0.960274
2746	NA	NA	NA	NA	NA	NA	NA	NA	NA	NA	NA	NA	NA
2747	NA	NA	NA	NA	NA	NA	NA	NA	NA	NA	NA	NA	NA
2749	NA	NA	NA	NA	NA	NA	NA	NA	NA	NA	NA	NA	NA
2752	0.480584	0.861862	1.02221	1.78093	1.08872	2.3351	1.46758	1.77832	1.62012	-0.332413	0.586617	0.356359	1.56541
2760	-0.573953	-0.580956	-1.18941	-1.80977	-1.07222	-0.606022	-1.13151	-1.02903	-1.01256	-0.767075	-0.930911	-0.415129	NA
2762	-0.819856	-0.934198	-0.112926	-0.719251	-0.70805	-0.17939	-0.580528	-0.680824	0.121936	-0.211274	0.1326	-0.646988	NA
2764	0.946323	0.598188	0.877075	0.902638	0.752937	0.567535	0.851956	0.158961	0.735693	0.496942	0.390173	0.438976	1.3987
2765	-1.33578	-1.29587	-1.11918	-1.30877	-1.00689	-1.088	-0.638064	-1.01564	-1.21001	-0.785983	-0.505107	-0.914449	-0.567741
2766	-0.767642	-0.309692	-0.675869	-0.0808502	-0.253772	0.205022	0.5398	0.0140813	0.662871	-0.471529	0.563125	0.173264	0.320982
2767	0.855792	0.546099	0.865874	0.516024	0.651944	0.941357	0.915302	0.88839	1.30182	0.835533	0.935024	0.931622	1.08038
2768	0.163173	0.613495	0.166029	0.647066	0.330114	0.0140062	0.401336	-0.0388521	0.660735	0.226535	0.499602	0.424074	0.587991
2769	NA	NA	NA	NA	NA	NA	NA	NA	NA	NA	NA	NA	NA
2770	-0.32159	-0.430501	-0.493605	-0.0631564	-0.103203	-0.715323	-0.595704	-0.890565	-0.390691	-0.634806	NA	NA	NA
2771	0.380581	0.0318356	-0.155483	0.252506	0.405527	0.642716	0.0741453	0.32249	-0.0855412	0.411449	-0.089941	-0.0968129	NA
2773	-0.710796	-0.638862	-0.72091	-0.587222	-0.642973	-0.541965	-0.659644	-1.23918	-0.379915	-0.489911	-0.80674	-0.952989	-0.52656
2774	0.0750069	0.251838	-1.05313	-0.705311	0.0288108	-0.334845	-0.464989	0.785527	-0.0550513	-0.299919	-0.636623	0.76568	NA
2775	-1.07605	NA	NA	NA	NA	NA	NA	NA	NA	NA	NA	NA	NA
2776	-0.678997	-1.10487	-1.05778	-0.381151	-0.408499	-0.438514	-0.177287	-0.536541	-0.148969	-0.287853	-0.240137	-0.326836	0.422517
2778	4.74701	4.6954	4.82506	4.57101	4.93	5.07294	5.42411	4.94936	5.77523	NA	NA	NA	NA
2779	NA	NA	NA	NA	NA	NA	NA	NA	NA	NA	NA	NA	NA
2780	-1.28207	-1.3864	-1.01199	-1.2785	-0.990368	-1.21594	NA	NA	NA	NA	NA	NA	NA
2781	-0.161975	0.238485	-0.666663	0.239766	0.0857009	-0.3193	-0.530438	-0.50009	-0.179158	-0.351546	-0.380174	0.287055	NA
2782	NA	NA	NA	NA	NA	NA	NA	NA	NA	NA	NA	NA	NA
2783	0.734616	1.02498	0.73213	1.48272	1.22248	1.57545	1.27424	0.994679	1.40328	1.17545	1.19811	1.35277	1.46224
2784	0.874269	0.261171	0.857153	0.813547	0.720402	0.680478	0.0698429	1.26428	0.203967	0.62626	0.837155	-0.0621776	-0.381151
2785	0.726989	0.959152	-0.137756	0.210109	-0.343254	1.30009	1.18176	0.685129	1.22645	1.76871	0.317052	0.464739	0.327187
2786	-1.48126	0.298585	-0.289988	0.134003	0.0134241	0.521456	0.503328	0.907079	NA	NA	NA	NA	NA
2787	-0.695891	-0.38536	0.180319	-0.149753	0.0673122	0.53704	1.12596	0.72678	0.153293	-0.200256	0.490793	0.922903	-0.598973
2788	0.252883	-0.709853	0.210883	0.329753	0.265402	-0.152378	1.04652	-0.391534	0.765197	0.569258	0.0691888	0.271421	0.252419
2790	NA	NA	NA	NA	NA	NA	NA	NA	NA	NA	NA	NA	NA
2791	-1.31364	-0.560592	-0.456121	-1.25154	-0.192434	0.411584	0.0908984	-0.0548895	1.14653	1.08659	-0.296369	0.252201	NA
2792	-1.22914	NA	NA	NA	NA	NA	NA	NA	NA	NA	NA	NA	NA
2793	NA	NA	NA	NA	NA	NA	NA	NA	NA	NA	NA	NA	NA
2794	-1.39092	-1.38105	-0.790088	-0.987264	-0.553117	-0.635222	-0.592374	-0.839507	-0.739566	-0.521259	-0.64122	-0.532468	-0.862143
2796	-1.04792	-1.0864	-1.26541	-1.175	-1.30604	-1.10299	-1.02159	NA	NA	NA	NA	NA	NA
2797	NA	NA	NA	NA	NA	NA	NA	NA	NA	NA	NA	NA	NA
2798	NA	NA	NA	NA	NA	NA	NA	NA	NA	NA	NA	NA	NA
2799	-0.144325	-0.0791465	0.0261652	-0.134357	-0.0202199	-0.392174	-0.55965	-0.119299	-0.5855	-0.444284	-0.801066	-0.798399	0.195812
2800	0.117246	0.200137	0.421152	0.0665321	0.0521968	0.0746553	-0.542512	-0.339562	-0.0313305	-0.25593	-0.0215844	0.048153	0.0235306
2801	0.439177	0.513663	0.372089	-0.431624	0.381856	0.113309	0.0941406	-0.492502	-0.355202	0.0271096	0.513641	-0.182564	NA
2802	1.74617	1.51087	1.73113	1.60316	1.98786	1.39239	1.55651	1.59279	1.55635	1.67632	1.97671	1.95954	1.60446
2803	2.20464	1.74332	1.8658	1.59671	2.03997	1.2378	1.64885	1.66248	1.63079	1.72301	2.32675	1.6417	2.03439
2804	1.52359	1.27073	1.41206	1.45946	1.71783	1.35634	1.35558	1.2125	1.13637	1.16022	1.9184	1.32621	1.09919
2805	-0.0473174	0.477869	-0.631333	-0.361263	-0.155055	0.70382	-0.278976	0.507117	0.0954309	0.529162	-0.0589833	-0.0257488	0.7407
2806	1.54254	1.21853	0.882522	0.928984	1.0666	1.36821	0.780519	1.08796	1.31614	1.58311	1.40351	0.876135	1.99541
2810	NA	NA	NA	NA	NA	NA	NA	NA	NA	NA	NA	NA	NA
2811	-1.06786	-1.47066	0.0962729	-0.574449	0.270639	-1.0752	0.715116	-0.849801	0.342454	-0.00937574	0.551914	-0.262511	NA
2812	0.6195	1.29731	0.871774	1.28411	0.49918	1.10229	1.11071	1.10641	0.528204	0.716814	-0.687446	0.188113	NA
2813	-0.486005	NA	NA	NA	NA	NA	NA	NA	NA	NA	NA	NA	NA
2814	NA	NA	NA	NA	NA	NA	NA	NA	NA	NA	NA	NA	NA
2815	-1.69103	-1.39238	-1.24853	-1.12629	-1.09755	-0.993928	-0.420515	-0.710673	-0.506061	-0.891263	NA	NA	NA
2817	-0.684528	-0.673539	-1.32154	-0.573599	-1.38215	-0.185633	-0.902051	-0.737451	-0.366825	-1.1279	-0.0967917	NA	NA
2819	-1.80896	NA	NA	NA	NA	NA	NA	NA	NA	NA	NA	NA	NA
2820	-1.32904	-0.902202	-1.66341	-1.45165	-1.22355	-0.766116	-1.00385	-1.23701	-1.13846	-0.831194	NA	NA	NA
2821	-0.559824	-0.138287	-0.571583	-0.261524	-0.895914	-1.20433	-0.634655	-1.14454	-0.880697	-0.847895	-0.997837	NA	NA
2822	-1.41704	-1.02021	-1.17453	NA	NA	NA	NA	NA	NA	NA	NA	NA	NA
2823	-1.65837	-0.453381	-0.839507	NA	NA	NA	NA	NA	NA	NA	NA	NA	NA
2824	NA	NA	NA	NA	NA	NA	NA	NA	NA	NA	NA	NA	NA
2825	NA	NA	NA	NA	NA	NA	NA	NA	NA	NA	NA	NA	NA
2826	-0.540631	-0.882079	-0.236194	-0.661783	-0.0412202	0.459578	0.319633	-0.347266	0.936745	1.10148	-1.04203	0.239045	-0.274403
2827	-0.7117	-1.09165	-0.417788	-0.904173	-0.540085	-0.423189	-0.483946	-0.646567	-0.659605	-0.778709	-0.646797	-0.442162	NA
2828	-1.09394	NA	NA	NA	NA	NA	NA	NA	NA	NA	NA	NA	NA
2829	-1.47966	-1.2576	-1.31593	NA	NA	NA	NA	NA	NA	NA	NA	NA	NA
2830	-0.621029	-0.436955	0.161221	-0.196714	0.105502	1.1416	-0.0489233	0.635816	0.0858052	-0.152984	-0.594653	1.89747	NA
2831	-1.45348	-1.69887	NA	NA	NA	NA	NA	NA	NA	NA	NA	NA	NA
2832	-1.02499	-0.964202	-0.849515	-0.889518	-0.750044	-1.08917	-1.2257	-1.15033	-1.05778	-0.999462	-0.930079	NA	NA
2833	-0.942702	-1.05533	-0.82574	-0.888772	-0.583136	-0.512303	-0.491238	-0.55004	-0.725779	-0.898223	-0.600029	-0.335693	NA
2834	-1.48741	-1.52897	-1.49113	-0.612202	-1.39659	-0.998845	-0.935086	NA	NA	NA	NA	NA	NA
2835	-0.398863	NA	NA	NA	NA	NA	NA	NA	NA	NA	NA	NA	NA
2837	-1.127	-1.19847	-1.15662	-0.912609	-1.25545	-0.896466	-1.00176	-1.18598	-0.86529	-0.969289	-0.885543	NA	NA
2838	NA	NA	NA	NA	NA	NA	NA	NA	NA	NA	NA	NA	NA
2840	NA	NA	NA	NA	NA	NA	NA	NA	NA	NA	NA	NA	NA
2841	NA	NA	NA	NA	NA	NA	NA	NA	NA	NA	NA	NA	NA
2842	0.75226	0.658313	-1.03117	0.420002	0.73817	0.530636	0.805492	0.362874	0.954342	0.831224	0.876483	0.847555	1.32903
2843	-1.29201	NA	NA	NA	NA	NA	NA	NA	NA	NA	NA	NA	NA
2844	-1.63058	-1.43733	NA	NA	NA	NA	NA	NA	NA	NA	NA	NA	NA
2845	-1.00554	-1.71137	-1.20601	-0.886337	-0.622483	-0.986213	-0.852859	-1.06762	-1.15529	NA	NA	NA	NA
2846	NA	NA	NA	NA	NA	NA	NA	NA	NA	NA	NA	NA	NA
2847	NA	NA	NA	NA	NA	NA	NA	NA	NA	NA	NA	NA	NA
2848	NA	NA	NA	NA	NA	NA	NA	NA	NA	NA	NA	NA	NA
2849	0.589626	1.05982	0.212945	-0.354308	0.130997	NA	NA	NA	NA	NA	NA	NA	NA
2850	-0.852189	-0.575123	0.033473	-0.31895	-0.637078	-0.737325	-0.473021	-0.196172	-0.623416	-0.459432	-0.515722	-0.458244	NA
2852	-0.630768	-1.41046	-1.448	-0.603313	-0.0881367	0.313947	0.379456	-0.581885	NA	NA	NA	NA	NA
2853	-1.03623	-1.0738	-0.808244	-0.889269	-0.944919	-0.703354	-0.633899	-0.82886	-0.759169	-0.717389	-0.601888	-0.668152	NA
2854	NA	NA	NA	NA	NA	NA	NA	NA	NA	NA	NA	NA	NA
2857	-1.46759	-1.55854	-1.38921	-1.17466	-1.08136	NA	NA	NA	NA	NA	NA	NA	NA
2859	-1.10042	-1.10582	-0.967933	-1.25723	NA	NA	NA	NA	NA	NA	NA	NA	NA
2861	-1.03764	-0.372876	-0.760424	-1.13983	NA	NA	NA	NA	NA	NA	NA	NA	NA
2862	-0.984005	-0.905844	-1.2687	-1.16516	-1.0129	-1.21065	-0.848466	-1.07368	-0.901093	NA	NA	NA	NA
2863	-1.27487	-1.20356	-1.13729	-1.20279	-1.05094	-0.73492	-0.992591	-0.806649	-0.781496	-0.777782	-0.928052	NA	NA
2864	-1.44138	-1.31901	-1.11765	NA	NA	NA	NA	NA	NA	NA	NA	NA	NA
2865	-0.141212	0.0467951	-0.135967	0.131791	0.247282	0.6287	0.973159	0.846096	0.649612	0.686628	0.646555	0.697353	-0.0398066
2867	NA	NA	NA	NA	NA	NA	NA	NA	NA	NA	NA	NA	NA
2868	-1.30082	NA	NA	NA	NA	NA	NA	NA	NA	NA	NA	NA	NA
2869	-1.5797	-1.43643	-1.71549	-1.19826	-0.992591	NA	NA	NA	NA	NA	NA	NA	NA
2870	-0.892011	-0.703762	-0.710796	-1.03629	-0.739355	-0.823836	-0.473942	-0.686685	-0.665255	-0.697954	-0.619911	-0.983839	NA
2872	NA	NA	NA	NA	NA	NA	NA	NA	NA	NA	NA	NA	NA
2873	1.24713	1.18432	1.20393	1.15175	0.89738	1.41653	0.955355	1.03832	1.04283	1.37109	1.23447	0.924654	2.14502
2874	0.999589	1.03408	0.729107	0.70142	0.850101	0.697623	1.02979	0.896049	0.838467	0.925524	1.05399	0.731464	1.49996
2875	0.356074	0.312929	0.598996	0.635691	0.596758	1.04533	1.22315	0.972439	0.791724	0.713009	0.785812	0.895165	0.119695
2876	1.83742	1.43959	1.22599	1.58768	1.39942	2.48206	2.39771	2.50777	2.26798	2.51019	2.64692	2.03823	2.91813
2877	-1.48779	NA	NA	NA	NA	NA	NA	NA	NA	NA	NA	NA	NA
2878	3.73955	1.41193	2.04985	1.24887	2.956	2.93202	2.67971	2.97708	2.97941	2.97819	3.20706	2.57561	1.54842
2879	-0.771755	-0.901193	-0.553428	-0.892811	0.0459975	0.263927	0.159249	-0.271895	0.0734237	0.0959809	0.300158	-0.078441	NA
2880	NA	NA	NA	NA	NA	NA	NA	NA	NA	NA	NA	NA	NA
2882	-1.3588	0.075534	0.265445	0.769549	0.290543	0.512327	0.706944	1.05679	1.55063	0.679911	1.22187	0.763192	-0.0959881
2885	4.61014	4.45317	4.53859	4.40065	4.52716	3.96551	3.80059	4.13052	3.94459	4.01852	4.17976	4.28162	3.40454
2886	-1.15761	-0.789105	-0.990423	-0.766247	-0.996942	-1.2262	-1.21149	NA	NA	NA	NA	NA	NA
2887	-0.21752	0.197707	-1.19924	-0.824347	-0.86913	-0.563844	-0.94344	-0.580671	-0.233738	NA	NA	NA	NA
2888	-1.28971	-0.782339	1.73769	NA	NA	NA	NA	NA	NA	NA	NA	NA	NA
2889	-1.18433	-1.16188	-0.981637	-1.18078	-0.772062	-0.959733	-0.947036	-0.979878	-0.776238	-1.0303	-0.797542	-0.890266	NA
2890	0.426795	0.235667	-0.233394	-0.712728	0.0640456	-1.23469	-1.16436	-0.814422	-1.11574	-0.813963	-0.862626	NA	NA
2891	-0.953576	0.381629	-1.38717	-0.475215	-0.840545	-0.894211	-0.848943	-0.838658	-0.620135	-0.764505	-0.721823	NA	NA
2892	NA	NA	NA	NA	NA	NA	NA	NA	NA	NA	NA	NA	NA
2893	NA	NA	NA	NA	NA	NA	NA	NA	NA	NA	NA	NA	NA
2894	-1.52254	-1.52313	-1.53365	-1.26953	-1.4566	NA	NA	NA	NA	NA	NA	NA	NA
2895	NA	NA	NA	NA	NA	NA	NA	NA	NA	NA	NA	NA	NA
2896	0.778161	0.754896	0.762833	1.08192	0.213127	1.10188	1.18216	0.851896	1.22456	0.908474	0.952	0.709073	2.33769
2897	-0.347543	-1.49946	NA	NA	NA	NA	NA	NA	NA	NA	NA	NA	NA
2898	0.498279	-0.799077	0.806625	0.504479	0.848433	-0.245463	0.357902	-0.153029	0.308445	0.559341	0.577355	0.639521	0.109879
2899	-0.304012	-0.84116	0.952797	0.940218	0.635518	0.422964	1.4655	0.0755867	0.93112	0.869153	0.706286	0.612542	0.221552
2900	NA	NA	NA	NA	NA	NA	NA	NA	NA	NA	NA	NA	NA
2901	-1.0405	-0.785805	-1.04391	-1.08535	-0.950912	-1.07022	-0.927014	-1.03542	-0.814238	-0.979275	-0.685606	NA	NA
2902	-1.26302	-1.27088	NA	NA	NA	NA	NA	NA	NA	NA	NA	NA	NA
2903	NA	NA	NA	NA	NA	NA	NA	NA	NA	NA	NA	NA	NA
2904	-1.39702	NA	NA	NA	NA	NA	NA	NA	NA	NA	NA	NA	NA
2905	-1.71512	-1.20182	-0.613754	NA	NA	NA	NA	NA	NA	NA	NA	NA	NA
2906	-1.17027	-1.18721	-1.20889	NA	NA	NA	NA	NA	NA	NA	NA	NA	NA
2907	NA	NA	NA	NA	NA	NA	NA	NA	NA	NA	NA	NA	NA
2908	-0.793538	-0.179505	-1.14244	-1.19065	-1.19045	-1.48107	-0.967662	NA	NA	NA	NA	NA	NA
2909	-1.34071	-1.14578	-1.59227	-1.59184	NA	NA	NA	NA	NA	NA	NA	NA	NA
2911	NA	NA	NA	NA	NA	NA	NA	NA	NA	NA	NA	NA	NA
2912	-1.06047	-1.49322	-0.490008	-1.21023	-1.45449	NA	NA	NA	NA	NA	NA	NA	NA
2913	NA	NA	NA	NA	NA	NA	NA	NA	NA	NA	NA	NA	NA
2914	0.875528	-0.195207	-0.0595928	-1.37397	-0.471117	-0.761508	-0.577857	NA	NA	NA	NA	NA	NA
2915	-1.50438	-1.07046	-1.37995	-1.28002	NA	NA	NA	NA	NA	NA	NA	NA	NA
2916	NA	NA	NA	NA	NA	NA	NA	NA	NA	NA	NA	NA	NA
2917	-0.99521	-1.38054	-1.23563	NA	NA	NA	NA	NA	NA	NA	NA	NA	NA
2918	-1.89759	NA	NA	NA	NA	NA	NA	NA	NA	NA	NA	NA	NA
2919	NA	NA	NA	NA	NA	NA	NA	NA	NA	NA	NA	NA	NA
2920	NA	NA	NA	NA	NA	NA	NA	NA	NA	NA	NA	NA	NA
2921	-1.13456	-1.10808	-1.06684	-0.980537	-0.968801	-0.75266	-0.06614	-0.931641	-0.682336	-0.795336	-0.515988	-0.587941	NA
2922	NA	NA	NA	NA	NA	NA	NA	NA	NA	NA	NA	NA	NA
2923	0.409406	0.121184	-0.584532	-0.0240651	0.0813997	0.957493	0.496497	1.1053	0.407051	0.502476	0.470651	0.254448	0.63011
2925	0.0405958	-0.836211	1.1144	0.578264	1.42181	0.449241	2.03256	0.649461	1.68877	1.49029	1.83063	1.30445	0.5758
2926	-1.44301	-1.56637	-1.14644	-1.26938	NA	NA	NA	NA	NA	NA	NA	NA	NA
2928	-1.29155	-1.5142	-0.997278	-1.39229	-1.1469	-1.14028	-0.861949	NA	NA	NA	NA	NA	NA
2931	-0.865484	-0.95235	-0.614013	-0.722613	-0.989147	-0.672632	-0.258269	-0.736269	-0.508335	-0.564019	-0.689811	-0.612461	-0.597337
2932	0.0048758	-0.208836	0.338601	-0.0312911	0.344467	0.79315	0.0103196	0.165567	-0.096961	0.47846	0.253753	0.223381	0.905869
2934	1.92512	2.27446	1.63351	2.02769	2.13996	1.83377	2.02799	2.40334	2.31377	1.79626	2.47907	2.31661	1.01429
2935	1.21721	1.06873	0.687463	0.895418	0.924696	2.65122	1.03306	1.20847	1.16656	1.57842	1.38788	1.00165	1.66135
[truncated: 22,723 more rows]

## Sheet: 36314
id	GSM887860	GSM887861	GSM887862	GSM887863	GSM887864	GSM887865	GSM887866
1	NA	NA	NA	NA	NA	NA	NA
2	NA	NA	NA	NA	NA	NA	NA
9	-0.142649	-0.0155222	0.613677	-0.222246	0.218655	-0.579635	-0.780604
10	0.767151	0.768077	1.12038	0.082928	0.193783	0.724298	-0.246806
12	0.154268	0.172743	-0.779824	-0.218786	9.05443	0.732239	1.16914
13	-0.0285745	0.18297	-0.230418	-0.0254212	-0.657519	-0.103553	-0.0359414
14	0.630056	-0.129431	0.278278	0.0990212	-0.393189	0.224516	-0.269869
15	0.64982	-0.17824	0.764704	0.50111	-0.427596	-0.108734	-0.595214
16	0.213671	0.717948	-1.62305	0.0311792	-0.136163	0.577762	-0.095695
18	0.523055	1.3075	0.0484723	-0.285663	0.110204	0.0302709	-0.267328
19	0.0182864	1.15161	0.557087	-0.903914	-0.0828023	0.29495	0.175559
20	0.920907	0.242183	-0.193778	0.402577	0.129262	0.354137	-0.915824
21	1.2811	1.45083	0.305939	0.900917	-0.615293	0.552524	-1.06659
22	-0.678768	0.678253	-0.493909	0.313485	-0.607699	-0.141398	0.879644
23	0.0452902	-0.109808	0.227141	-0.906113	-0.327499	-0.302011	-0.188834
24	-0.254602	0.265257	0.0578761	0.0836829	-0.102913	-0.496398	-0.479451
25	1.01052	-2.07453	-0.0215069	0.970967	-0.44092	-2.44049	-0.421248
26	0.547442	0.612509	2.27336	0.347251	-0.434738	-0.30264	-0.142513
27	0.430975	0.109045	0.383056	-0.0609006	1.36789	0.748907	-0.574479
28	-0.450484	-0.484547	0.714943	0.342414	-0.380679	-1.80948	-0.31003
29	0.722495	-0.287509	0.364452	1.46114	0.038859	-0.370967	-0.703369
30	-0.0416207	-0.503299	0.184289	-0.129637	0.269229	0.413702	-0.0228952
31	-0.350167	-0.0242668	0.0358226	0.10748	-0.0346406	-0.265642	-0.652398
32	-0.0415569	0.313792	0.152588	0.328228	0.138	0.0526388	-1.1681
33	0.360352	-0.341731	-0.0719783	0.00735913	-0.326479	-0.305428	0.306261
34	-1.21928	-2.23088	-1.48284	-0.643786	0.330824	0.484881	2.28322
35	0.118269	-0.562229	0.270086	-0.0486671	0.381795	-0.408538	-0.0158488
36	-0.33371	-2.21058	-0.754773	-0.785303	-1.67201	-2.82051	1.22614
37	0.266251	0.68807	0.129418	-0.372929	1.05884	-0.376399	-0.0837501
38	-0.00784548	-0.0566704	-0.563323	-0.158389	0.143228	0.294872	0.465689
39	-0.285631	0.599402	0.0692424	-0.400241	-0.136621	1.1621	-0.180381
40	-0.181871	-0.170871	0.107199	-0.907056	-0.310683	-0.583446	-0.618345
41	0.476327	0.283097	-1.46737	-0.00635692	-0.0581589	-0.29168	-0.271068
43	0.170086	-0.081736	0.540104	0.422568	0.739383	-0.184433	-0.443831
47	0.106573	0.415387	0.0212271	-1.09053	-0.962042	-0.766932	0.0739526
48	-1.07953	0.232603	-1.03057	-0.652957	-0.914751	-0.603256	0.564264
49	0.468141	0.45396	-0.446457	-0.0224699	0.447568	-0.682785	-0.663293
50	0.895953	-0.0495541	-0.0149617	0.941412	-0.822424	0.494487	-0.572473
51	0.00613942	-0.615892	-0.686006	-0.0706553	-0.120581	0.704051	0.694753
52	-0.713066	-0.782458	-0.0401747	-0.0243412	-0.0649243	-0.0953153	0.578898
53	0.633116	-0.159659	-0.45648	0.682452	-0.0404147	-0.0774419	-0.368511
54	0.59959	1.11324	-0.499861	0.581187	-0.46306	0.43643	-0.193758
55	-0.493762	-0.474942	-0.236512	-0.0498093	0.369181	0.00945679	0.0274464
56	-0.246124	0.204062	0.183484	-0.221884	0.073383	0.115774	-0.440021
58	0.517444	0.529868	0.783325	-0.793342	0.351781	0.170758	0.706571
59	0.0717471	4.31301	-3.92556	-0.268207	2.69555	-1.39265	-0.136261
60	0.149043	0.827044	-0.241425	-0.526388	-0.460366	-1.11164	0.843346
70	-0.0457492	0.336181	0.494034	-0.0187667	-0.29337	-0.997912	0.434776
71	NA	NA	NA	NA	NA	NA	NA
72	0.462658	-0.000492283	0.74584	0.313279	0.814004	0.715211	-0.0640236
81	-0.775388	0.711574	0.111613	-0.285657	0.330207	1.16564	-0.113755
86	-0.577567	-1.67276	-1.18029	-0.383905	-0.503455	-0.206982	1.26003
87	-1.05465	-0.237289	-0.13671	-1.36567	0.905009	-2.34598	0.599902
88	-0.43821	-0.0715712	-0.103098	-0.0392754	0.509816	0.805501	-0.0252404
89	0.139018	0.1123	0.863526	0.33729	-0.123905	-0.0851673	0.0605282
90	-0.844354	0.0639413	-1.6398	0.21877	-0.167533	-0.837176	-0.128456
91	0.776102	1.04097	0.12369	-0.294195	-0.0344782	0.428457	-0.233706
92	-0.485878	0.221545	-0.823335	0.0869092	-0.0715165	0.223275	-0.305754
93	0.164096	0.267559	1.17502	0.0507189	-0.450465	0.250103	-0.100455
94	1.36341	0.222874	0.0286289	0.132386	0.610967	0.768814	-0.67085
95	NA	NA	NA	NA	NA	NA	NA
97	-0.695614	1.24375	0.0403673	-0.104883	0.382994	0.48844	0.139349
98	NA	NA	NA	NA	NA	NA	NA
100	-0.0508513	0.245447	0.0543248	-0.280526	-0.308879	-0.0182123	-0.246661
101	0.231339	-0.0699915	0.0324323	0.268962	0.19402	0.193498	-0.421258
102	0.544044	-0.194446	0.996228	0.208279	-0.177675	0.243853	-0.150152
103	1.13945	0.0318961	-0.459303	-0.00519037	-0.672434	-1.16128	-0.0593255
104	2.39445	0.345789	-0.902188	-0.0193879	-0.918831	-1.52616	-0.0451279
105	NA	NA	NA	NA	NA	NA	NA
107	-1.27127	-0.431515	0.474367	2.31361	-0.700152	0.366999	-0.53376
108	-0.0550345	0.0934011	-0.650879	-0.00194743	-0.120984	-0.108617	-0.131708
109	0.769686	-0.259914	-0.312931	0.0907339	-0.127672	0.0625848	-0.0441482
111	NA	NA	NA	NA	NA	NA	NA
112	0.0314131	-0.115423	-0.169804	0.615155	-0.095929	-0.515239	-0.296593
113	-1.18854	0.235117	-0.903393	0.540544	0.0367917	-0.355089	0.19427
114	1.51981	0.0499427	0.191286	-0.114459	0.39489	1.03813	-0.728912
115	-2.13399	-0.0417923	0.54205	-0.67094	0.408522	-0.684016	0.939613
116	-0.272669	-0.273914	-0.593173	-0.268845	0.286235	-0.469375	-0.0582911
117	0.344566	0.183318	0.477958	0.150448	0.387432	-0.0735367	-0.369843
118	-0.0701616	-0.453284	-0.089999	-0.30862	0.0903754	0.579402	0.346831
119	0.0497984	-0.392364	-0.12589	0.436144	-0.197675	0.332241	-0.443398
120	-0.11897	-2.56143	-2.87543	-3.8962	0.993937	0.987603	2.65692
123	0.236359	0.387183	-0.753153	-0.385676	6.44089	0.239622	-0.484072
124	-0.511105	-0.0181697	-0.511809	-0.609875	0.188217	-0.0463476	0.604616
125	-0.917216	-0.165178	-1.19341	-1.24304	1.85138	0.963713	2.01211
126	0.00296635	-0.149602	-0.277482	-0.0674837	0.068972	1.20859	0.28292
127	NA	NA	NA	NA	NA	NA	NA
128	0.407145	-3.29938	-1.2008	-0.374591	-0.560136	-0.114939	0.917022
130	-0.0262338	-0.0382821	0.544234	0.676983	-0.466306	0.162931	-0.186379
131	0.0352598	-0.00208414	0.190845	0.43147	-0.438356	-0.173712	0.0236338
132	-0.159844	-0.253765	-0.00839838	-0.0561167	-1.08419	-0.0564129	0.569344
133	0.0746452	-0.106454	-0.0504002	-0.906447	6.88397	-0.290762	7.00174
134	0.107863	0.883219	-0.0622115	-0.630284	1.36429	0.319731	-0.0340864
135	NA	NA	NA	NA	NA	NA	NA
136	0.597146	2.25153	-0.935479	0.439185	0.104719	0.0836176	-0.615412
140	0.463065	0.606735	-0.0976438	-0.153263	0.256315	-0.46598	-0.391912
141	0.205378	0.71128	0.520491	-0.149751	-0.259246	0.685049	-0.138025
142	-1.19224	-1.77408	-1.18202	0.785456	-0.768176	-0.361783	0.175002
143	0.412946	-0.431825	0.117355	-0.627905	0.145182	0.292598	0.0926736
146	0.574298	0.462396	0.228113	0.0148612	0.225771	0.328893	-0.448456
147	0.593493	0.348983	0.899208	-0.0731843	0.209348	0.427818	-0.276549
148	0.510172	-0.0190857	0.188586	-0.0454302	0.992832	0.808756	-0.25433
150	0.71804	0.769095	1.14723	0.479642	-0.0906977	0.277073	-0.399534
151	NA	NA	NA	NA	NA	NA	NA
152	0.49333	1.21119	-0.077369	0.254149	1.3137	0.0128547	-0.159314
153	0.229052	0.387913	-0.131832	0.394626	0.0629099	-0.089358	-0.0505657
154	0.431044	0.994584	0.0741516	0.17223	0.424622	-0.520914	-1.08233
155	-1.01062	-0.431073	0.265752	0.0705821	1.34367	-1.24966	-0.40403
156	-0.253653	-0.0121897	0.531361	0.413728	0.0198114	-0.0523262	-0.41751
157	0.453248	0.179445	-0.290998	-0.474802	-0.0969725	0.0359396	0.144302
158	-0.331755	-0.283386	-0.146563	0.213139	-0.0466408	-0.315485	-0.134294
159	0.808056	0.73547	1.05082	0.403805	-0.431334	-0.0479562	-0.0555296
160	NA	NA	NA	NA	NA	NA	NA
161	0.142976	-0.172754	-0.782136	0.356333	0.0168616	0.361607	-0.514553
162	-0.471178	0.0452719	0.0754472	0.00147171	-0.447522	0.139993	0.275595
163	-0.504078	-0.551779	-0.936244	-0.364432	-1.17552	-0.741054	0.635053
164	-0.152036	-0.144535	-0.935489	-0.410118	-0.814544	-0.768707	-0.218585
165	0.131156	1.51546	-0.345906	-1.12299	2.11015	0.967038	-0.177525
166	0.686214	-3.35347	-2.11979	-1.33387	-0.118743	1.39506	1.83466
167	0.629094	-0.0716563	-0.235278	0.451189	-0.0973127	0.000861092	0.211725
172	NA	NA	NA	NA	NA	NA	NA
173	-0.0152473	0.373215	0.580579	0.629325	-0.345673	-0.680353	-0.275178
174	-0.0899975	0.0254816	1.12644	-0.308434	0.419805	-0.285213	-0.178768
175	-0.173149	2.31788	-0.437302	-0.222094	0.261349	0.263521	-0.172347
176	0.929834	0.738063	0.0770345	0.759348	0.0281778	-0.0798008	-0.654317
177	0.995498	0.991663	0.9191	0.181682	0.462152	0.919956	-0.33157
178	-0.10012	-2.71297	-0.293765	1.46458	0.0356039	-0.138608	0.319622
181	0.323958	0.266722	0.907269	0.624976	-0.0323277	-0.00466482	-0.428313
182	0.379965	0.438146	-0.218784	0.441619	-0.455988	-0.633565	-0.329053
183	0.890904	0.424643	0.161362	1.68566	0.945165	-0.427017	-1.31897
185	-0.0403372	1.72191	0.223215	-0.0241787	0.0867056	-0.566588	-0.268628
186	0.0888458	0.913598	1.3803	-0.108279	-0.0213648	-0.0431518	-0.904966
187	-0.0444869	0.323264	0.157514	0.151124	0.218279	0.444125	-0.35447
189	0.563611	0.022187	0.58216	-0.0742536	0.789198	1.12374	-0.0130251
190	0.370084	0.542641	0.713265	0.358975	-0.136046	2.03248	-0.0890436
191	-0.214769	0.789171	1.61435	0.220702	-1.20702	-1.27624	-0.072314
196	-0.372346	0.730834	0.293353	1.20137	-1.40483	-1.56027	-0.971867
197	-0.509166	0.298911	-0.46867	0.215383	-0.0112707	-0.77263	-0.0510518
199	0.17528	-0.398467	0.158549	-0.294361	-0.183177	-0.370065	-0.194391
202	0.249431	0.699359	-0.0970727	-0.000594055	-0.0371504	-0.0273654	-0.241482
203	0.0157999	0.228364	0.00428631	1.17399	-0.613683	-0.39666	-0.148885
204	-1.47666	-1.16962	0.725344	0.351965	0.402779	-0.567097	-0.00998416
205	NA	NA	NA	NA	NA	NA	NA
207	0.123762	0.0600269	-0.18219	0.399672	-0.630007	-1.14847	-0.124543
208	-0.0887671	0.398262	0.0988055	0.0242513	-0.652937	-0.842957	-0.345874
210	-0.261354	0.365214	0.311708	0.195334	-0.0991506	0.0855907	-0.585809
211	0.848471	-0.815356	-0.110386	-0.229933	0.192444	-0.640793	0.0458704
212	-0.0723459	0.485085	-0.165609	-0.120041	0.155307	1.82354	-0.54202
213	0.426132	0.751205	-0.0280748	-0.605879	-0.436461	0.0122167	-0.201213
214	0.663539	-0.421508	-0.23517	3.06425	-1.26657	-1.95441	-1.04577
215	-0.00702526	0.740302	-0.0535262	0.19487	0.147732	0.298398	-0.488507
216	-2.82694	-0.480267	-0.206623	-0.389541	-0.854948	-0.57213	1.17495
217	0.0572534	-3.16074	-2.48619	-1.74674	1.67286	1.45999	2.61778
218	0.144158	0.30115	0.0878889	0.017413	-0.140864	-0.296959	-0.294212
219	0.636706	0.445264	0.978352	0.155945	0.0364605	-0.141221	-0.446943
220	-0.428395	0.933118	4.07987	-0.92411	0.0732114	-1.13216	-0.137727
221	-0.631332	2.244	0.170538	1.19004	-0.147761	-0.086911	0.0306931
222	-0.22637	0.148285	-0.300801	0.187822	0.115237	-0.200891	-0.129978
223	-0.100887	-2.18883	-2.84246	-0.317196	-0.0391418	0.832327	1.55115
224	-0.0136949	-1.99293	-1.469	-0.186994	0.799143	-0.0508209	1.03864
225	0.467056	-0.0887292	0.210711	0.50406	0.0242133	-0.43503	-0.10327
226	2.42862	0.246696	0.0650941	0.771481	-1.25626	-0.1209	-0.245083
228	NA	NA	NA	NA	NA	NA	NA
229	0.387001	-0.119357	-0.164919	-0.235087	0.246523	2.84199	0.0548413
230	0.69143	-0.0733575	0.00884162	-0.150435	0.639497	0.462878	-0.137846
231	-0.618005	-0.684987	0.881444	-0.185443	-0.254655	-0.0696361	-0.0736248
238	0.185024	-0.249538	0.572743	0.894851	-0.407254	-0.719482	-0.839968
239	-0.624699	0.476638	-0.294204	0.107729	-0.0680822	-0.692436	-0.186751
240	-0.0194153	0.944308	-0.380321	0.0471676	0.464019	0.955633	-0.098136
241	-0.178723	-0.342121	-0.0372461	-0.233129	-0.0272697	1.18709	0.0238397
242	0.404309	0.710912	-0.164992	0.394434	0.431893	0.770767	-0.628779
244	NA	NA	NA	NA	NA	NA	NA
245	0.644341	-0.205951	-0.572506	0.840555	0.507269	-0.291669	-0.207986
246	0.10178	0.221776	-0.743333	-0.519006	-0.0133957	-0.0341788	-0.0303371
247	0.191526	-0.1631	0.25918	0.109968	0.650125	0.936932	-0.643455
248	0.627665	0.659402	0.796744	0.15463	0.0374342	-0.491548	-0.849523
249	0.826321	0.54503	-0.233272	0.871648	0.0462562	-0.110772	-0.463976
250	NA	NA	NA	NA	NA	NA	NA
251	0.0375967	0.0139422	0.0670095	-0.243607	0.0251991	0.0370788	-0.334698
257	0.919071	0.663594	0.255974	0.455058	0.581302	0.798857	-0.566389
258	NA	NA	NA	NA	NA	NA	NA
259	0.0322516	0.813517	1.19329	0.00735154	0.0175634	-0.0718674	-0.31308
262	0.19026	-1.15157	-1.63201	-0.991285	-0.140613	-1.71536	0.786145
265	0.162837	0.431852	-0.0858736	1.12937	0.0213577	0.0938325	-0.634127
266	0.369358	0.500093	0.291456	0.242487	0.860731	0.000241365	-0.0960824
267	1.63603	0.626831	-0.363922	-0.0234146	-0.341697	-0.0411012	0.196539
268	0.0469291	0.941855	0.751042	1.05033	-0.242893	-0.304645	-0.500984
269	-0.00239552	-0.0621203	-0.281791	0.0603474	-0.0797279	0.755748	-0.137995
270	0.57761	0.456026	1.05655	-1.08744	-0.317429	-1.00256	0.0857092
271	0.418203	-0.481752	0.423054	0.497346	-0.518234	-0.705052	-0.2375
272	-0.625812	-0.361467	-1.41171	0.169131	-0.705004	0.470594	0.0816035
273	-0.287013	3.17496	-2.8525	0.897195	-1.76761	-0.21713	-0.272638
274	0.195875	0.0399587	0.364753	0.163508	-0.255094	-0.104475	0.739845
275	-0.368366	-0.0865419	-0.0628358	-0.333159	0.663699	0.829273	0.435487
276	NA	NA	NA	NA	NA	NA	NA
278	NA	NA	NA	NA	NA	NA	NA
279	NA	NA	NA	NA	NA	NA	NA
280	NA	NA	NA	NA	NA	NA	NA
283	-0.279666	0.0148597	-0.378278	0.0659569	0.724946	0.0310759	-0.155089
284	-0.576143	-0.195824	1.89982	2.0569	-0.331628	-1.48617	-0.0103244
285	1.47165	5.36016	0.730234	-0.247112	-0.696902	-0.0444155	-0.454314
286	0.250276	0.599736	-0.635031	-0.156226	0.401013	-0.282777	-0.860411
287	0.361327	-0.589193	0.444079	1.38419	-0.379921	-0.729606	-0.358727
288	-0.707542	0.134285	-1.4439	-0.428302	-1.46124	1.23555	-0.316299
290	-0.155046	0.330724	0.62453	0.272484	0.762623	-0.0501192	-0.893021
291	-0.915493	0.235018	-0.832955	-0.50623	-0.676372	0.410213	1.5307
292	-1.30229	-1.85315	-3.87241	-0.279777	0.215261	-0.510939	1.76563
293	-2.38824	1.40072	0.615389	1.11007	0.14654	0.509476	-0.596973
301	4.18184	0.000525406	-0.636937	-0.319742	5.58298	-0.349279	-0.0650413
302	-0.0388349	-0.0256809	-0.150477	-0.0229802	0.5035	-0.954923	-1.06349
303	0.449649	0.531892	-0.0301969	-0.829969	2.08432	-0.378557	-0.0689115
304	NA	NA	NA	NA	NA	NA	NA
305	NA	NA	NA	NA	NA	NA	NA
306	-0.297696	0.413303	-0.591334	0.00887959	1.97569	2.00101	1.24319
307	-0.847284	-0.119599	-0.4633	-0.898544	1.03711	0.997761	1.31969
308	-0.688724	-0.947793	-0.129431	0.292377	-0.872552	-1.00028	1.26277
309	0.14493	1.41887	-1.37044	1.12924	-0.404335	0.702594	-0.608979
310	-0.365069	-4.37063	-2.46043	-0.619721	-0.593463	-1.93496	1.86503
311	-1.76069	-0.0506174	-0.0576622	0.630192	-0.727369	-1.08069	0.351662
312	-0.157788	0.56206	-0.692905	-0.0160295	-0.536111	0.0344085	-0.0484863
313	0.359643	0.327529	0.569011	-0.0699687	0.134681	0.516706	-0.649137
314	0.721577	0.678923	-0.633082	-0.31603	0.266182	-0.0490453	-0.506536
316	-0.856248	1.38985	-0.0761402	-0.36874	0.555035	0.631164	0.32715
317	-0.0832671	0.209272	0.518989	-0.270715	0.236648	0.408296	-0.214604
318	NA	NA	NA	NA	NA	NA	NA
319	0.496955	-0.0283497	1.85007	0.211857	0.297179	0.533273	-0.243231
320	0.475745	-0.228859	0.152005	0.227206	0.452277	-0.176332	-0.251418
321	1.7637	-0.302643	-0.393274	-0.156407	0.0918913	2.69031	0.379565
322	0.54208	-0.0362892	-1.44878	1.16445	0.308131	-0.0282251	-0.095932
323	0.321931	-0.103662	-0.0470813	0.234696	-0.0146033	-0.525794	-0.0583321
324	-0.613334	0.93553	0.320077	0.36377	-0.0709074	-1.33233	-0.337629
325	0.0248057	0.124524	0.239955	-0.332598	-0.182498	0.141293	-0.0707419
326	-0.305947	0.0183867	1.12498	0.782474	-0.0829025	-0.14315	-0.673346
327	NA	NA	NA	NA	NA	NA	NA
328	0.60311	1.00441	-0.244989	0.180473	-0.831509	-0.865506	-0.674152
329	-0.709732	-0.313123	-1.54615	0.03902	-0.506379	-0.707458	0.761863
330	0.215986	-0.542044	-0.825857	-0.442456	0.0348292	-0.126513	0.743457
331	0.395554	-0.0330798	-0.330712	-0.213889	-0.0510518	0.0226215	-0.443384
332	-0.170972	-0.0023135	0.514563	-0.0546031	-0.565405	-0.0366401	-0.638105
333	-0.108934	1.31239	1.92778	1.03678	-1.03053	-0.0422222	-0.682538
334	3.67458	-0.92888	-1.23035	-0.250803	-0.417237	-1.03806	0.639434
335	-0.615348	-0.639116	0.116633	0.373301	-0.0951619	0.174665	0.37393
336	NA	NA	NA	NA	NA	NA	NA
337	0.772659	1.18108	0.0714646	-0.0481415	0.0649119	0.23697	-0.308791
338	-0.415409	1.05062	-0.321668	-0.20031	0.461664	0.0129139	-0.0774298
339	0.395429	0.247609	0.165511	-0.195487	-0.224	-0.153637	-0.187017
341	-0.252383	1.79159	-0.0505718	-0.391659	0.786065	1.20969	0.592509
343	-0.192023	-0.887415	0.71333	0.0202519	-0.181397	-0.383562	-0.483402
344	NA	NA	NA	NA	NA	NA	NA
345	0.425519	0.173428	0.169458	-0.119773	-0.395979	-0.290472	-0.186651
346	NA	NA	NA	NA	NA	NA	NA
347	-0.671812	0.454531	-1.19714	-1.9515	5.06675	1.4975	0.275288
348	4.43818	0.484852	0.126532	-1.60919	-0.284692	0.696073	0.00931249
350	0.347422	0.392513	-0.453648	-0.255558	-0.217267	-0.137816	-0.0790391
351	-1.87318	0.865966	-0.873725	-0.0216132	-0.960557	-2.03414	-0.0429027
353	0.0719081	0.0973048	0.368612	0.0785246	-0.134261	-0.0466727	-0.560598
354	0.521649	0.498603	0.722459	0.470044	-0.0177216	-0.627778	-0.949672
355	0.308676	-0.552684	-1.26618	-0.109227	-0.0551666	0.0292365	-0.698294
356	1.20752	-0.0113937	0.551657	-0.200279	0.575229	0.330172	-0.0744678
357	0.00222814	-0.124376	0.0600361	0.688219	-0.0667455	-0.534215	-0.386955
358	-0.644416	-0.0534745	-0.0110429	0.481351	0.127334	-0.688184	0.0556174
359	-0.273542	0.015168	0.0463413	0.305847	-0.0589776	0.181703	-0.156726
360	0.822809	0.747113	1.16976	-0.335732	0.421977	0.838228	-0.00379446
361	-0.280004	-0.0209737	-0.180691	-0.0367312	0.483264	0.00541336	-0.239006
362	0.142671	0.026194	-0.00401775	0.341853	-0.181219	-0.15843	-0.831759
363	0.460068	0.422246	0.553228	0.120903	-0.0408977	-0.0236182	-0.494448
364	NA	NA	NA	NA	NA	NA	NA
366	1.04903	0.179736	0.584068	-0.417246	-0.454664	-0.308222	-0.210334
367	-0.414582	-0.353545	-0.0641314	-0.0514619	-0.00290437	-0.329331	0.833311
368	NA	NA	NA	NA	NA	NA	NA
369	0.382453	0.883093	0.11689	0.194788	-0.269508	0.0953454	-0.0710791
372	-3.15207	-1.40705	-1.91766	0.3238	-0.388316	-0.551054	1.23921
373	-0.655264	1.36085	0.706636	-0.56375	-1.09973	-0.606635	0.300287
374	4.80957	-0.339154	-0.584274	-0.558179	0.414612	-0.8326	4.40601
375	NA	NA	NA	NA	NA	NA	NA
377	-0.406805	-1.8051	-1.07005	0.625633	-0.79162	-0.794232	0.557432
378	-0.327686	0.26317	-0.414488	-1.37344	-1.12917	-1.94708	1.02968
379	-0.464182	0.0922073	0.57995	-0.310985	0.775821	-0.717856	0.135478
381	-0.0034922	-0.645829	-0.0610237	0.325019	-0.222323	-0.371975	0.140209
382	-0.0721135	-0.180245	0.317204	0.296109	-0.779796	-0.544539	-0.494882
383	-0.262719	0.542557	0.539211	0.0839472	-0.236288	0.912646	0.133882
384	0.41249	-0.719265	-0.50037	0.904278	0.79273	-0.357061	0.540336
387	-0.20121	-1.07823	-0.892122	-0.0618074	0.0321331	-0.00731082	1.05571
388	-0.513082	0.202722	0.146455	0.0991215	0.292355	-1.08593	0.549983
389	1.50776	0.130928	-0.0404633	-0.403837	0.208464	0.583898	0.240031
390	6.36031	-0.789411	-1.34181	-1.56094	1.23544	-1.23542	1.46526
391	1.09475	0.26567	-0.472566	-0.11381	0.241699	0.0294962	-0.358937
392	0.398939	0.41319	0.00528729	-0.030748	0.0284542	0.0181862	-1.1214
393	0.0197871	-0.428564	-0.109359	0.010072	-0.244624	-0.82707	-0.0745893
394	-0.156495	-0.226367	0.0904802	-0.435015	-0.262265	-0.145999	0.0803337
395	0.000344653	1.57753	0.72704	0.0762356	0.579402	0.788513	-0.209663
396	0.590521	0.0992278	0.804856	-0.0325102	-0.493971	-0.181974	-0.0320056
397	0.90725	0.680857	0.148394	1.31689	-1.18614	-0.862819	-0.746165
398	NA	NA	NA	NA	NA	NA	NA
399	0.932494	0.666525	0.29666	-0.0956738	-0.882264	0.472452	-0.161602
400	-2.9945	-1.20867	-1.64501	0.333447	-1.43458	-2.61145	1.65615
401	NA	NA	NA	NA	NA	NA	NA
402	1.0536	-0.276179	-1.18359	-0.129072	-0.0198755	0.30667	0.0132466
403	-0.241816	0.313602	-0.285923	-0.0276495	-0.147461	-0.172133	0.0776664
405	0.770325	0.069294	-0.735913	-0.0821613	0.0176454	-0.303837	-0.445609
406	-0.344388	-1.26582	-0.806033	0.128215	0.507536	-0.0648301	0.586105
407	0.0739708	0.469965	0.177888	0.173343	-0.492701	-0.593796	-0.551603
408	NA	NA	NA	NA	NA	NA	NA
409	0.0875623	0.252465	2.79724	1.5601	-0.152078	-0.545688	-0.20357
410	-0.198749	0.070339	-0.0279138	0.0864231	-0.0272758	0.312866	-0.104359
411	-0.141809	1.71053	-0.0608156	-0.74948	0.165849	-0.00370029	0.0975099
412	-0.0432627	1.3304	1.43443	-0.0212532	0.397117	-0.24119	0.117002
414	0.703735	0.34302	0.695729	0.964109	0.0101145	0.601866	-1.21077
415	0.196042	0.0449287	0.807985	0.587923	-0.039722	-0.541924	-0.625557
416	0.100874	0.260982	-0.479843	0.0300111	0.158817	0.372915	-0.335026
417	0.0181831	-0.0335703	0.436246	-0.116442	0.198433	0.0794223	-0.0309455
419	-0.192553	-0.929737	0.0342664	-0.544601	0.430055	1.271	1.78034
420	0.141535	0.274424	-0.00667894	0.0678723	0.113216	-0.0759169	-0.258296
421	0.198773	0.117501	0.681429	0.356278	-0.301202	-0.79621	-0.460709
427	-0.447935	-3.29785	-0.576486	0.350026	-0.693681	0.224398	0.552599
429	0.743442	0.228031	0.16191	0.133088	-0.322346	0.171838	-0.229022
430	0.473974	-0.219814	0.409927	-0.108913	0.602168	0.00830391	-0.652056
432	1.25886	0.0369846	0.432292	0.301792	-0.1015	0.738429	-0.25654
433	0.394469	-0.127386	0.278761	0.0489675	-0.033513	0.238203	-0.3812
434	0.637506	0.89154	0.71558	-0.183991	0.764652	0.760267	-0.288058
435	0.218854	0.798098	1.62404	-0.151806	-0.477629	0.37583	-0.364806
438	0.304508	-0.108987	0.30982	0.0439839	-0.445565	-0.209222	-0.378944
439	-0.0561053	2.87582	0.409273	0.305306	-0.24446	0.598477	-0.418381
440	-2.65385	2.07982	0.584939	2.23674	-0.186932	-1.15464	0.122414
443	0.611607	0.0176484	0.494042	-0.0821643	0.513167	1.02955	-0.41097
444	-0.552099	0.315518	0.290982	0.843356	-0.194644	-0.146807	-0.330183
445	-0.0810342	0.410164	0.684759	3.68378	-0.0447922	-0.494329	-0.485049
460	-0.242601	1.08148	-1.26852	-0.612069	-0.330107	-0.0678498	2.01086
462	-0.434283	0.244223	0.0025213	0.165668	-0.0670387	0.157517	-0.823392
463	0.370453	0.418266	-1.14402	0.915741	-0.143651	-1.56982	-0.351081
466	0.617473	0.657409	0.14599	0.143768	-0.926444	-1.20055	-0.3138
467	0.802715	-1.11296	-1.63131	-1.8086	0.655932	2.15209	1.07511
468	-1.39624	-0.494885	-0.0920891	-0.0727104	3.06206	0.232111	0.417899
471	-0.598471	-0.340125	0.101989	-0.0926997	0.0281838	-1.40058	0.445094
472	-0.135305	0.504615	0.370344	-0.0569088	0.73602	1.32861	-0.833312
473	-0.0736096	-1.29974	-1.11385	-0.104396	0.163118	-0.634625	0.18486
474	NA	NA	NA	NA	NA	NA	NA
475	0.699447	0.369268	-0.474352	-0.856205	0.192521	0.548698	-0.364751
476	0.624638	0.255949	0.3909	-0.238328	-0.0910759	-0.0593559	-0.00515999
477	0.579232	0.231078	-0.50721	0.46959	-0.116713	0.276476	0.0521968
478	NA	NA	NA	NA	NA	NA	NA
479	-0.0346725	0.39588	-0.569313	0.0534028	0.689721	0.663296	-0.372311
480	NA	NA	NA	NA	NA	NA	NA
481	1.97537	0.369177	-0.74171	-0.108946	-0.235754	-0.846684	0.0444304
482	0.806457	-1.02621	-0.115347	1.72074	-0.0749797	-0.472985	0.606828
483	5.67358	-0.512962	-1.54799	-2.3787	4.39358	-1.29237	9.54277
486	NA	NA	NA	NA	NA	NA	NA
487	1.36087	1.38327	0.103454	0.232565	-0.293264	-0.0772855	-0.815517
488	-0.157006	-0.987977	1.28456	5.46024	-1.27329	-0.410279	-0.500524
489	0.700062	0.501855	-0.00549568	0.710596	-0.0619608	-0.255843	-0.37543
490	0.259921	-2.38292	-0.93826	0.210521	-1.23855	-0.877454	-0.14973
491	-0.667903	0.579498	-0.0424622	-0.304539	-0.261851	-0.341478	-0.0220537
492	0.990864	1.01675	1.52055	-0.170553	0.3511	0.693999	0.114928
493	0.0907293	0.229424	-0.283743	0.175901	-0.690514	-1.16951	-0.364618
495	0.300782	0.222833	-0.457401	0.391919	-0.218012	-0.0520619	-0.337177
496	-0.0438733	0.16911	0.0869229	-0.0192421	-0.195493	0.307176	-0.158995
498	0.118555	-1.11669	-0.00168162	1.70402	-1.62126	-1.84825	-0.0628327
501	-0.55437	0.394721	-0.290606	-1.36688	-0.575023	0.877052	0.179
506	0.65822	0.935781	0.752845	1.45449	0.0074047	0.0887486	-1.09459
509	-0.034354	-0.906552	-1.22424	-0.097454	-0.0301619	0.505745	1.16807
513	-0.356631	4.04315	0.827047	-0.250609	-1.47217	1.78409	0.120408
514	NA	NA	NA	NA	NA	NA	NA
515	-0.78684	-0.0624659	-0.70466	-0.936	-0.126761	0.0595272	0.611813
516	-0.751912	0.448858	-0.459467	-0.612646	-0.519191	-0.0128641	0.276604
517	1.12461	0.367002	-0.150798	-0.232973	0.0746149	0.00976058	-0.793702
518	0.405115	-1.59693	-1.60683	0.11261	0.903295	0.804764	0.568387
521	-1.27604	0.012317	-0.322084	-1.00204	-0.0768328	1.66103	0.187934
522	-1.789	-3.22838	-2.13464	0.00252282	0.41271	-0.216797	0.363724
523	0.52757	-1.11301	-0.490502	1.0387	-0.817229	-0.0208188	-0.142532
525	0.301606	-0.481175	0.128871	1.0906	-0.193387	-0.379508	-0.993021
526	-0.824806	-2.71414	-3.87365	0.390828	0.324785	0.722544	0.446896
527	0.0953515	0.221251	-1.01719	0.0330293	-0.440935	0.420976	0.351867
528	0.789002	-0.245089	-0.166517	-0.474176	-0.0842377	0.300401	0.78825
529	0.680196	-0.190082	-0.0563635	-0.39054	-0.00815231	0.324441	-0.0601093
533	-1.04951	0.358177	1.13371	0.129479	-0.0455487	1.63745	-0.164807
534	0.523025	0.266041	0.0174191	0.20446	0.192632	0.0930442	-0.590728
535	1.0853	-0.0115365	0.0537173	0.419056	-0.434255	-0.504275	-0.334767
537	-0.967021	-0.142843	0.39431	0.609103	-0.883929	0.67865	-0.026492
538	0.580069	-0.332307	-1.32271	1.22628	-0.240866	-0.356273	0.116863
539	-0.438961	-1.51858	-0.274967	-0.260075	0.908657	0.932875	1.02834
540	0.506139	-0.496817	0.453447	-0.60379	-0.148146	-0.828084	-0.42385
545	0.0267332	-1.31279	-0.42834	0.432719	-0.0517779	0.159068	-0.161003
546	-0.167708	0.642444	-0.0344081	-0.266049	-0.436243	0.38442	0.199633
547	0.607229	0.663746	0.88979	0.24376	-0.218161	-0.35698	-0.331228
549	-1.70094	-1.55382	-0.27881	0.471671	-0.581293	-0.199477	0.38804
550	NA	NA	NA	NA	NA	NA	NA
551	-0.583216	-0.298957	0.18623	0.258299	0.0806876	1.03385	-0.208
552	0.404579	-0.00432761	0.0563541	-0.066981	-0.0601882	0.133989	-0.250042
553	0.300026	0.653311	0.42161	0.543916	-0.197577	0.608084	-0.604936
554	0.771014	0.409405	0.509777	0.454258	0.178656	-0.127518	-0.477548
558	-0.422401	0.404529	0.799843	0.243248	-0.417544	-0.520634	-0.0485896
563	0.418131	0.632456	1.40143	-0.0189641	0.349358	-0.0455517	-0.623461
566	0.242701	-0.0504959	0.480707	0.168387	-0.710265	1.02041	-0.803946
567	-0.144207	0.51732	3.11215	0.0809428	-3.515	-4.72417	-3.50839
570	-0.0539727	0.14769	0.545193	-0.0105431	0.141394	0.219975	-0.538818
571	NA	NA	NA	NA	NA	NA	NA
572	-0.0134079	-0.552251	-0.837648	0.635065	0.110606	0.618954	-0.0368846
573	-0.206569	1.35597	5.52483	5.09507	-0.994095	-1.10158	-0.0740167
574	2.41229	0.094355	0.558716	-0.276665	-0.131092	-0.460114	-0.0260713
575	0.494053	0.187819	0.543649	0.399836	-0.330411	0.0797702	-0.425567
576	1.15826	0.445465	-0.802784	0.289737	-0.120448	-0.844142	-0.400444
577	-0.668137	-0.577426	-0.721524	-1.96527	-1.4217	-0.0169561	0.287115
578	0.480201	0.818815	0.211276	0.0343386	-0.149575	-0.0988529	-0.201441
579	0.133425	0.515063	-0.688301	0.123993	0.0143766	-0.597798	-0.307329
580	-1.87383	0.093269	-0.308986	-1.40428	0.709572	-0.115818	0.0513021
581	0.851868	1.92591	-0.0498853	-0.268481	0.0703406	0.443244	-0.644633
582	NA	NA	NA	NA	NA	NA	NA
583	NA	NA	NA	NA	NA	NA	NA
585	-0.459912	-1.09155	-0.618473	-0.0898608	0.578984	0.5987	0.0253434
586	-0.661383	0.0418908	1.12701	5.72084	0.186669	0.023589	-0.62398
587	-0.109056	2.63286	-0.51374	-0.25401	0.396467	0.274	-0.395742
590	-0.240905	-0.224744	-0.00636148	0.0741516	0.247706	1.6826	-0.249172
593	0.239125	0.822074	0.139781	-0.458529	0.356652	-0.178247	-0.21211
594	0.500621	0.147147	0.0247313	-1.02099	-1.22351	-0.0327708	-0.0317451
595	-1.20933	-0.13586	-1.19413	1.06803	-1.36965	-1.80149	0.268139
596	0.222268	0.575038	0.411074	0.277336	-0.107477	-0.58798	-0.625059
597	0.830425	1.47144	-0.0915544	0.111047	0.552588	-0.0547337	-0.0184568
598	-0.0333282	0.351609	-0.124985	0.269629	0.18131	-0.0311876	-1.00405
599	-0.323459	1.6891	0.84796	1.10964	-0.2288	-0.0486883	-0.015829
602	NA	NA	NA	NA	NA	NA	NA
604	-1.443	-0.0882902	-0.707797	-1.30687	3.53367	-0.495778	3.32538
605	-0.712185	0.0701841	-0.113221	0.868571	-0.773172	0.0204843	0.0561172
606	NA	NA	NA	NA	NA	NA	NA
607	-0.0190796	-0.471466	-0.519618	0.324059	-0.8176	-0.232389	-0.16003
608	0.149487	-0.00394028	0.276935	-0.0605756	0.259393	0.756351	-0.898528
610	1.67465	-0.901634	-1.01278	0.766855	-1.03989	0.284841	-0.504622
611	0.387654	0.924688	0.00260028	0.336234	-0.462281	0.00600423	-0.400831
613	-0.0502498	-0.177078	-0.0142676	0.0513781	0.113921	0.97359	0.0196853
617	0.473749	0.969076	-0.0506189	0.395011	0.119626	1.02928	-0.404279
622	0.573794	-0.924713	0.851147	0.365737	0.372622	0.0405131	-0.888211
623	0.62476	0.082101	0.943691	-0.129603	-0.14209	-0.199686	-0.387965
624	0.543117	-0.549783	-0.193384	0.162551	0.566017	0.0945221	-0.0362315
627	2.46171	1.5464	0.359459	-1.08925	-0.707765	-0.424552	0.233145
629	0.1961	-0.0879181	-0.0290651	-1.28568	0.91668	0.165139	-0.0354507
631	0.270619	0.487981	1.27213	0.0479407	-0.767481	-0.0963907	-0.368515
632	NA	NA	NA	NA	NA	NA	NA
633	1.13373	2.3932	-0.979993	1.64119	-0.260312	0.195796	-1.40233
634	0.505399	0.116354	0.560216	-0.204129	-0.378688	0.292462	-0.344856
635	-0.515254	0.0595151	-0.290176	-0.175766	0.471823	-0.110786	-0.0683465
636	-0.422927	-0.0497121	0.981847	0.085896	-0.716984	-1.45959	-0.182765
637	-0.384868	-0.113006	-0.63865	-0.215186	0.319743	-0.582478	0.0484906
638	0.186769	-0.110617	-0.292021	0.179369	0.312522	0.0460998	-0.681352
639	0.452194	-0.0336022	-0.0309137	0.172333	0.120807	-0.3637	-0.29519
640	1.27051	0.766315	0.682051	-0.364007	-0.0070769	0.679476	-0.616694
641	-0.0056901	-0.422763	-0.764871	-0.0588258	1.24516	0.791243	1.51812
642	-0.915904	-0.344199	0.867747	0.166351	0.0776649	-0.233857	-0.252872
643	0.0429297	0.242526	-0.0606318	0.0759606	0.427339	0.0675062	-0.329046
644	0.227196	-0.346963	-0.41419	0.389944	0.254315	-0.473249	0.195954
645	1.06836	0.363907	-0.851897	-0.0218517	1.07312	2.01718	-0.14291
646	-0.0306429	0.0358773	0.121546	0.37419	-0.1206	0.0693806	-0.290677
648	NA	NA	NA	NA	NA	NA	NA
649	0.33388	0.474036	-0.0229924	0.0420001	0.415836	-0.156945	-0.791872
650	-0.123937	0.132816	0.00898288	0.641426	0.426059	-0.0734987	-0.586803
651	0.253681	-0.307618	0.175025	0.56084	-0.47059	-0.351951	-0.715846
652	-0.194902	0.452493	-0.0241422	0.420094	0.188094	0.625906	-0.937994
653	-0.353282	0.244413	-0.134858	-0.28959	0.487442	0.0279074	-0.077606
654	0.32533	0.126017	-0.741932	-0.869718	0.497277	0.93776	-0.0210542
655	0.185885	0.717775	0.838681	0.218237	0.490366	-0.242317	-0.444236
656	NA	NA	NA	NA	NA	NA	NA
657	-1.05957	-1.38997	-1.01735	-0.530969	0.394614	-1.68114	0.0109195
658	0.305389	1.02621	0.795822	-0.182007	0.305704	-0.136459	-0.349229
659	0.698032	-0.248029	0.704973	0.00441694	-0.171723	-0.615975	-0.795947
660	0.138407	0.17949	1.02953	-0.0391676	-0.0253483	-0.0582501	-0.439735
661	-0.092803	1.20889	0.229225	0.312023	-0.0816266	0.322819	-0.263948
662	0.118078	0.576385	-0.0443609	-0.0695297	-0.020155	0.0906048	-0.639607
663	-0.496474	-0.854708	0.0499791	-0.105755	0.0412391	-0.380167	0.699572
664	0.702046	-1.86182	-0.359153	-1.09561	-0.13677	-2.09516	0.0722544
665	-0.892923	-2.03081	-1.32481	-0.379292	-0.0516153	-0.363412	1.73342
666	NA	NA	NA	NA	NA	NA	NA
667	-1.49469	-1.99094	1.46881	-1.77027	-0.0697652	0.176243	1.10236
668	NA	NA	NA	NA	NA	NA	NA
669	-1.52764	0.315313	0.440031	0.039465	-0.8578	-0.444709	0.242405
670	-0.793436	-0.333157	-0.923458	-0.253516	0.00193347	-0.0607351	-0.0310315
671	NA	NA	NA	NA	NA	NA	NA
672	0.32634	0.707914	0.261343	-0.248179	0.0964405	0.143912	-0.268106
673	NA	NA	NA	NA	NA	NA	NA
675	-0.141775	0.0824131	-0.477448	0.0772593	0.399041	-0.875755	-0.233153
676	0.504675	0.0603467	0.701108	0.0883112	0.98565	0.674922	-0.124863
677	-0.71573	-0.35404	-1.59922	-0.569648	2.33298	0.642181	2.70148
678	0.0819589	-0.0611649	-0.741973	-0.729055	1.51903	0.406514	3.7173
680	0.0883324	0.594016	-0.233689	-0.089841	-0.291165	0.502697	-0.105753
682	-0.221764	3.28024	1.40599	1.36184	-2.79221	-0.200885	0.136369
683	0.0847644	0.477217	-0.728435	-0.282583	-0.222097	1.17353	-0.079813
684	1.91687	5.29653	-0.9689	-0.837184	0.120616	-0.109318	0.0448041
685	0.245377	0.0812921	0.316335	0.0513173	-0.0822737	0.596435	-0.140912
686	-0.209667	0.607692	0.163162	-0.151519	0.341976	0.893267	-0.191956
687	-0.797507	-0.800624	-0.716721	0.0900959	0.281571	-1.11338	2.16489
688	1.28066	0.101401	-0.362549	0.506441	-0.223651	0.248614	-0.198672
689	-0.710449	-0.310943	-0.59135	0.0325402	1.03102	-0.301881	-0.0191267
690	0.156662	0.884017	-0.285188	0.856483	-0.345932	0.970154	-0.275024
694	-2.23902	-4.14513	-4.11471	0.666225	-0.017673	0.946792	1.06003
695	0.474603	0.203254	-0.0635405	-0.264407	-0.409021	-0.243206	-0.291528
696	-0.826679	0.480145	-0.104702	0.165662	0.412247	-1.13573	-0.688851
699	0.27693	0.412241	0.0873504	-0.267162	0.0150397	0.302819	-0.0150035
701	-0.304969	0.41569	0.285142	-0.111351	0.149218	-0.0549494	-0.158201
705	0.566783	0.269905	-0.27503	0.0193649	0.329226	-0.516795	-0.492473
706	-0.20467	-0.799947	-3.39069	2.03173	1.00717	0.510044	-0.015507
708	0.0206681	-1.17928	-1.02124	0.316134	0.251309	-0.40279	0.742378
710	0.599255	-0.127292	-1.47138	-0.0489572	2.13053	-0.677216	0.59498
711	0.826368	0.858198	0.621018	-0.0332741	-0.815551	-0.719312	-0.290121
712	NA	NA	NA	NA	NA	NA	NA
713	0.536542	1.33873	-0.309746	0.229755	-1.0595	-0.647821	0.218643
714	NA	NA	NA	NA	NA	NA	NA
715	2.27442	0.652932	-1.09321	-0.500502	1.22476	-0.211852	-0.12551
716	0.983744	0.740882	-1.23463	-2.09054	1.15722	-0.226544	-0.244962
717	0.934517	0.203579	0.682397	0.146095	-0.568648	0.142132	-0.370297
718	NA	NA	NA	NA	NA	NA	NA
719	1.18766	0.129084	0.632246	0.050526	0.169207	1.54083	-0.538764
720	NA	NA	NA	NA	NA	NA	NA
721	NA	NA	NA	NA	NA	NA	NA
722	0.134798	0.403139	-0.763828	-0.188005	0.427271	-0.0125147	-0.0336659
725	0.29932	0.0122653	-0.0319403	0.115939	0.357623	-0.0187409	-0.12401
726	-0.0155283	0.631874	0.246123	0.232289	0.156588	-0.209594	-0.899574
727	-0.274165	0.0484799	0.207301	1.11143	-0.321424	-0.255641	-0.212837
728	NA	NA	NA	NA	NA	NA	NA
729	-0.0706021	0.830474	-0.835494	0.00608473	-0.103574	-0.339183	-0.116652
730	0.967069	0.324174	-1.49076	-1.28729	0.495774	0.0893152	-0.0947548
731	-0.0862609	0.327059	-0.347276	0.0356494	0.345605	0.134283	-0.170214
732	0.63666	-0.122787	0.257365	0.680352	-0.140065	0.556303	-0.545282
733	0.170624	0.924957	-0.0910228	0.871132	-0.236202	-0.174788	-0.689482
734	-0.0335863	0.661647	0.0384899	0.310347	-0.389146	-0.331689	-0.188065
735	0.228579	-0.399784	-0.243204	0.627961	0.352908	-0.861041	-0.422814
738	NA	NA	NA	NA	NA	NA	NA
740	0.494918	-0.294909	-1.9066	-0.0430105	0.38288	0.52726	-0.0425594
741	NA	NA	NA	NA	NA	NA	NA
744	-2.36193	-1.99683	-1.015	-0.584255	-0.338978	0.963697	2.95077
745	-0.194148	0.0477129	-0.567693	-0.422366	0.690042	0.0193573	-0.220086
746	NA	NA	NA	NA	NA	NA	NA
747	0.556943	0.749883	0.369446	0.0620274	0.577976	1.00397	-0.696397
750	-0.0839202	0.624442	-0.0873986	0.137423	0.118693	0.167647	-0.286272
752	1.09375	-0.00514633	-0.55931	0.029323	0.304671	-0.486013	-0.0593695
753	-0.161338	-0.0412425	0.290908	0.16044	0.169897	-0.65079	-0.451478
754	-0.120338	-1.40489	-1.71931	0.0558225	0.388729	0.095953	0.600149
755	-0.00179554	0.408387	1.09345	0.754474	-0.340404	0.0144344	-0.327774
757	NA	NA	NA	NA	NA	NA	NA
758	-0.0559489	0.230609	0.694336	-0.0964241	0.331316	0.265813	-0.402315
[truncated: 24,186 more rows]

## Sheet: 46311
id	GSM1128550	GSM1128551	GSM1128552	GSM1128553	GSM1128554	GSM1128555	GSM1128556	GSM1128557	GSM1128558	GSM1128559	GSM1128560	GSM1128561	GSM1128562	GSM1128563	GSM1128564	GSM1128565
[truncated: 24,722 more rows]

[truncated: 2 more sheets: 51618, total]
